# Supplementary material for: The sleep-wake distribution contributes to the peripheral rhythms in PERIOD-2
Source: eLife. 2021 Dec 13;10:e69773. doi: 10.7554/eLife.69773 (PMC8798053; doi:10.7554/eLife.69773)
Supplement: Figure 1—figure supplement 2—source data 1. [file elife-69773-fig1-figsupp2-data1.xlsx]

## Sheet: SuplFig2B
DRINKING WATER										PUMP
	Activity				Photon						Activity				Photon
Time [hrs]	1AC	4AC	3CA21	4CA22	1AC	4AC	3CA21	4CA22		Time [hrs]	1AC	4AC	3CA21	4CA22	1AC	4AC	3CA21	4CA22
0.5	7.23333	5.875	9.9333	6.01127	0.71465	0.664267	1.05778	0.951237		0.5	12.9	7.10171	8.87	9.46	0.8863	1.02978	0.954617	0.9734
1.5	5.69583	9.8125	7.13335	10.209	0.649017	0.661317	1.08237	0.858		1.5	7.4	5.37288	8.17	7.66	0.916	0.929458	0.90745	0.937283
2.5	2.65417	2.7125	4.54443	8.3842	0.584117	0.553317	0.812667	0.608881		2.5	10.0723	6.19778	8.83333	12.3367	0.970567	0.922169	0.949667	1.06672
3.5	2.82083	4.17917	5.75002	4.14686	0.494067	0.511867	0.7615	0.515119		3.5	4.23888	3.75142	7.28667	9.04333	0.8396	0.964559	0.950567	1.05687
4.5	6.13333	1.57083	5.72227	8.02824	0.584983	0.4715	0.648117	0.592407		4.5	12.5556	3.24295	9.86667	6.21333	1.07272	1.16414	0.960617	1.04032
5.5	4.5375	4.91667	6.26662	4.54239	0.540633	0.443033	0.714167	0.615254		5.5	5.89447	3.67232	3.69667	6.22	1.03542	1.13485	0.906967	1.16295
6.5	3.21667	1.775	6.40557	5.11866	0.437933	0.401983	0.55245	0.596169		6.5	10.55	2.94349	5.46333	6.96667	1.0949	0.994339	1.03022	1.13187
7.5	4.40833	5.1625	6.43888	6.84748	0.523867	0.389917	0.457533	0.481678		7.5	3.71667	3.6441	7.17333	6.50333	1.00325	1.14602	1.09657	1.19042
8.5	6.05	7.69583	8.76665	4.29946	0.757383	0.489417	0.373383	0.619136		8.5	12.3944	5.86439	6.07333	9.06	1.25332	1.17083	1.03783	1.13028
9.5	10.025	9.19583	10.2833	10.3898	0.8003	0.435583	0.4206	0.910237		9.5	2.9278	5.56503	6.87667	8.16	0.863733	0.940034	1.03158	1.0535
10.5	7.60088	6.03509	10.1053	10.464	1.07154	0.551912	0.527298	0.970569		10.5	14.9889	4.20907	8.89	13.7033	1.14175	1.15086	1.07633	1.013
11.5	16.6042	16.1083	22.1945	22.6384	1.16537	0.729467	0.45585	0.883983		11.5	5.12179	9.61017	12.9231	11.2386	0.932731	1.19154	1.13456	1.00358
12.5	24.9167	26.2292	30.6056	20.7005	1.55742	1.45912	0.867867	1.12371		12.5	14.7722	28.8362	18.2933	18.8233	1.09668	1.4803	1.18553	0.989017
13.5	27.9375	25.175	33.6945	22.4859	1.51223	2.12808	1.25465	1.26398		13.5	14.1611	27.791	24.75	23.3	1.03968	1.10098	1.10032	0.999083
14.5	20.7792	23.1083	29.5778	21.4746	1.8901	2.34642	1.4881	1.28114		14.5	19.3722	24.952	28.6833	27.33	0.939983	1.0212	1.04347	0.914917
15.5	16.85	16.5542	17.1277	15.6272	1.84823	2.05975	1.63917	1.91381		15.5	22.7778	16.4746	34.0058	18.15	1.06007	0.967169	1.03592	0.919433
16.5	7.3625	18.2667	17.8083	10.2119	1.6117	1.9796	1.85018	1.77819		16.5	27.3556	19.0339	25.55	22.125	1.09735	0.874119	0.971533	0.887067
17.5	6.3575	9.6375	20.15	8.19491	1.39523	1.35722	1.80968	1.81746		17.5	22.5833	15.2288	19.5167	18.0917	0.947217	0.666153	0.948317	0.903517
18.5	8.70417	14.7875	15.45	17.6864	1.16883	1.40808	1.59098	1.60656		18.5	25.1083	14.2796	16.025	15.0958	0.961267	0.76078	0.93855	0.973517
19.5	10.9167	9.32083	5.95	7.9661	1.15202	1.34042	1.42107	1.279		19.5	16.8667	10.6667	13.0792	14.8125	0.968583	0.661542	0.939883	0.921433
20.5	5.4125	9.1625	3.175	6.44909	0.9173	0.81455	1.30682	0.98978		20.5	19.0583	4.94912	13.1292	15.6417	0.919933	0.704847	0.8798	0.974033
21.5	5.64583	10.1917	3.15833	6.79659	0.795767	1.12978	0.960383	0.849237		21.5	3.1	10.2938	8.2525	6.79333	0.751417	0.763407	0.892467	0.9423
22.5	6.96667	3.5875	4.46667	5.59886	0.720217	0.7632	1.0302	1.00722		22.5	16.3888	7.48592	9.75667	11.32	0.985017	0.829966	0.968783	0.9789
23.5	3.24167	3.69167	7.75558	4.81919	0.898283	0.64545	0.842383	0.951746		23.5	7.08893	3.0791	12.59	8.18	0.730067	0.709186	0.984417	0.933867
24.5	7.23333	5.875	9.9333	6.01127	0.71465	0.664267	1.05778	0.951237		24.5	12.9	7.10171	8.87	9.46	0.8863	1.02978	0.954617	0.9734
25.5	5.69583	9.8125	7.13335	10.209	0.649017	0.661317	1.08237	0.858		25.5	7.4	5.37288	8.17	7.66	0.916	0.929458	0.90745	0.937283
26.5	2.65417	2.7125	4.54443	8.3842	0.584117	0.553317	0.812667	0.608881		26.5	10.0723	6.19778	8.83333	12.3367	0.970567	0.922169	0.949667	1.06672
27.5	2.82083	4.17917	5.75002	4.14686	0.494067	0.511867	0.7615	0.515119		27.5	4.23888	3.75142	7.28667	9.04333	0.8396	0.964559	0.950567	1.05687
28.5	6.13333	1.57083	5.72227	8.02824	0.584983	0.4715	0.648117	0.592407		28.5	12.5556	3.24295	9.86667	6.21333	1.07272	1.16414	0.960617	1.04032
29.5	4.5375	4.91667	6.26662	4.54239	0.540633	0.443033	0.714167	0.615254		29.5	5.89447	3.67232	3.69667	6.22	1.03542	1.13485	0.906967	1.16295
30.5	3.21667	1.775	6.40557	5.11866	0.437933	0.401983	0.55245	0.596169		30.5	10.55	2.94349	5.46333	6.96667	1.0949	0.994339	1.03022	1.13187
31.5	4.40833	5.1625	6.43888	6.84748	0.523867	0.389917	0.457533	0.481678		31.5	3.71667	3.6441	7.17333	6.50333	1.00325	1.14602	1.09657	1.19042
32.5	6.05	7.69583	8.76665	4.29946	0.757383	0.489417	0.373383	0.619136		32.5	12.3944	5.86439	6.07333	9.06	1.25332	1.17083	1.03783	1.13028
33.5	10.025	9.19583	10.2833	10.3898	0.8003	0.435583	0.4206	0.910237		33.5	2.9278	5.56503	6.87667	8.16	0.863733	0.940034	1.03158	1.0535
34.5	7.60088	6.03509	10.1053	10.464	1.07154	0.551912	0.527298	0.970569		34.5	14.9889	4.20907	8.89	13.7033	1.14175	1.15086	1.07633	1.013
35.5	16.6042	16.1083	22.1945	22.6384	1.16537	0.729467	0.45585	0.883983		35.5	5.12179	9.61017	12.9231	11.2386	0.932731	1.19154	1.13456	1.00358
36.5	24.9167	26.2292	30.6056	20.7005	1.55742	1.45912	0.867867	1.12371		36.5	14.7722	28.8362	18.2933	18.8233	1.09668	1.4803	1.18553	0.989017
37.5	27.9375	25.175	33.6945	22.4859	1.51223	2.12808	1.25465	1.26398		37.5	14.1611	27.791	24.75	23.3	1.03968	1.10098	1.10032	0.999083
38.5	20.7792	23.1083	29.5778	21.4746	1.8901	2.34642	1.4881	1.28114		38.5	19.3722	24.952	28.6833	27.33	0.939983	1.0212	1.04347	0.914917
39.5	16.85	16.5542	17.1277	15.6272	1.84823	2.05975	1.63917	1.91381		39.5	22.7778	16.4746	34.0058	18.15	1.06007	0.967169	1.03592	0.919433
40.5	7.3625	18.2667	17.8083	10.2119	1.6117	1.9796	1.85018	1.77819		40.5	27.3556	19.0339	25.55	22.125	1.09735	0.874119	0.971533	0.887067
41.5	6.3575	9.6375	20.15	8.19491	1.39523	1.35722	1.80968	1.81746		41.5	22.5833	15.2288	19.5167	18.0917	0.947217	0.666153	0.948317	0.903517
42.5	8.70417	14.7875	15.45	17.6864	1.16883	1.40808	1.59098	1.60656		42.5	25.1083	14.2796	16.025	15.0958	0.961267	0.76078	0.93855	0.973517
43.5	10.9167	9.32083	5.95	7.9661	1.15202	1.34042	1.42107	1.279		43.5	16.8667	10.6667	13.0792	14.8125	0.968583	0.661542	0.939883	0.921433
44.5	5.4125	9.1625	3.175	6.44909	0.9173	0.81455	1.30682	0.98978		44.5	19.0583	4.94912	13.1292	15.6417	0.919933	0.704847	0.8798	0.974033
45.5	5.64583	10.1917	3.15833	6.79659	0.795767	1.12978	0.960383	0.849237		45.5	3.1	10.2938	8.2525	6.79333	0.751417	0.763407	0.892467	0.9423
46.5	6.96667	3.5875	4.46667	5.59886	0.720217	0.7632	1.0302	1.00722		46.5	16.3888	7.48592	9.75667	11.32	0.985017	0.829966	0.968783	0.9789
47.5	3.24167	3.69167	7.75558	4.81919	0.898283	0.64545	0.842383	0.951746		47.5	7.08893	3.0791	12.59	8.18	0.730067	0.709186	0.984417	0.933867
