# Supplementary material for: The sleep-wake distribution contributes to the peripheral rhythms in PERIOD-2
Source: eLife. 2021 Dec 13;10:e69773. doi: 10.7554/eLife.69773 (PMC8798053; doi:10.7554/eLife.69773)
Supplement: Figure 1—figure supplement 3—source data 1. [file elife-69773-fig1-figsupp3-data1.xlsx]

## Sheet: A
Time [h]	mouse	NREMS	REMS	R/N%	mouse	NREMS	REMS	R/N%	mouse	NREMS	REMS	R/N%	mouse	NREMS	REMS	R/N%	mouse	NREMS	REMS	R/N%	mouse	NREMS	REMS	R/N%	mouse	NREMS	REMS	R/N%	mouse	NREMS	REMS	R/N%
1	1	29.2	5.467	15.769	2	25.533	3.733	12.756	3	29.533	4.2	12.451	4	42.267	4.933	10.452	5	28.6	2.533	8.137	6	10.4	1.867	15.217	7	11.733	1.4	10.66	8	35.533	4.4	11.018
2	1	20.733	3.267	13.611	2	30.133	5.867	16.296	3	32.4	5.2	13.83	4	17.8	2	10.101	5	19.6	3.533	15.274	6	47.467	5.8	10.889	7	49.6	5.267	9.599	8	24.267	4.467	15.545
3	1	38.667	4.933	11.315	2	31.067	5.333	14.652	3	22.667	4.2	15.633	4	41.4	5	10.776	5	29.6	4.067	12.079	6	45.267	5.267	10.422	7	10.467	1.867	15.135	8	30.533	6.6	17.774
4	1	17.933	3.4	15.938	2	40.467	9.267	18.633	3	16.933	0.467	2.682	4	31.2	10	24.272	5	15.333	2.133	12.214	6	33.533	2.8	7.706	7	46.533	4.6	8.996	8	38.133	3.6	8.626
5	1	36	8.333	18.797	2	24	3.8	13.669	3	36.867	6	13.997	4	40	7.267	15.374	5	40.533	9.467	18.933	6	24.867	0.8	3.117	7	41.133	7.2	14.897	8	23.867	4.267	15.166
6	1	36.667	10.067	21.541	2	39.333	10.333	20.805	3	38.467	8.467	18.04	4	16.267	1.733	9.63	5	13.8	2.8	16.867	6	47	5.933	11.209	7	33	3.4	9.341	8	47.8	6.733	12.347
7	1	12.6	2.133	14.48	2	29.733	6.867	18.761	3	33.333	8.667	20.635	4	31.467	10.067	24.238	5	42.533	9.333	17.995	6	40.333	7.8	16.205	7	44.8	9.867	18.049	8	34.2	8.4	19.718
8	1	31	6	16.216	2	37.533	7.133	15.97	3	25.667	4.6	15.198	4	37.2	10.533	22.067	5	27.6	5.867	17.53	6	33.667	4.733	12.326	7	34.067	6.667	16.367	8	31.333	4.867	13.444
9	1	40	10.933	21.466	2	30.667	11.267	26.868	3	33.2	9.333	21.944	4	41.933	8.4	16.689	5	33.533	5.8	14.746	6	36.267	5.533	13.238	7	33.733	8.333	19.81	8	47.533	8.667	15.421
10	1	21.6	7.267	25.173	2	21.8	5.467	20.049	3	32.333	5.333	14.159	4	20.533	2.2	9.677	5	31.867	4.067	11.317	6	34.533	6.333	15.498	7	46.667	8.267	15.049	8	39.267	5.867	12.999
11	1	34.467	10.8	23.859	2	30.933	5.067	14.074	3	22.533	3.933	14.861	4	34.667	5.533	13.765	5	39.133	11.4	22.559	6	18.133	5.533	23.38	7	28.2	5.6	16.568	8	13.667	3.867	22.053
12	1	30.2	8.133	21.217	2	18.333	3.067	14.33	3	22.6	6.6	22.603	4	7.267	2.533	25.85	5	3.4	0	-1	6	21.333	5.933	21.76	7	41.667	10.667	20.382	8	34.4	5.733	14.286
13	1	24	6.2	20.53	2	9.467	1.133	10.692	3	17.4	4.667	21.148	4	21.067	2.6	10.986	5	26.8	5.467	16.942	6	13.267	2.533	16.034	7	18.733	2.2	10.51	8	14.067	2.333	14.228
14	1	26.4	4.933	15.745	2	9.6	0.467	4.636	3	5.667	0.667	10.526	4	0	0	-1	5	10.333	2	16.216	6	2.6	0	-1	7	10.133	1.267	11.111	8	16.4	2.533	13.38
15	1	11.133	1.067	8.743	2	2.267	0	-1	3	10.867	4.667	30.043	4	26.733	4.4	14.133	5	21.6	4.4	16.923	6	37.333	4.867	11.532	7	26.8	2.533	8.636	8	12.2	0.933	7.107
16	1	15	2.133	12.451	2	18.6	2.667	12.539	3	14.6	2.8	16.092	4	22.8	6	20.833	5	11.733	0.867	6.878	6	3.333	0	-1	7	26.4	2.4	8.333	8	3.667	0	-1
17	1	22.733	4.8	17.433	2	19.667	3.4	14.74	3	13.133	2.733	17.227	4	0	0	-1	5	31.533	6.667	17.452	6	41.467	4.867	10.504	7	12.4	1.4	10.145	8	25.133	2.667	9.592
18	1	14.533	4.6	24.042	2	0	0	-1	3	9.267	1.867	16.766	4	25.533	1.867	6.813	5	12.4	5.467	30.597	6	1.4	0	-1	7	25.067	4.533	15.315	8	0	0	-1
19	1	11.933	1.733	12.683	2	18.2	2.267	11.075	3	27.6	5.333	16.194	4	38.067	5	11.61	5	30.667	4.333	12.381	6	38.8	7.8	16.738	7	31.8	3.133	8.969	8	40.133	4.533	10.149
20	1	32.867	4.6	12.278	2	19.467	4.133	17.514	3	9.333	0.533	5.405	4	34.067	4.933	12.65	5	5.067	0	0	6	8.467	0	0	7	4.867	0	-1	8	8.133	0	0
21	1	0	0	-1	2	4.533	0	-1	3	18.4	2.867	13.48	4	0	0	-1	5	48.867	7.333	13.049	6	22.8	1.4	5.785	7	0	0	-1	8	34.2	4.733	12.158
22	1	27.2	2.667	8.929	2	16.533	2.533	13.287	3	19.8	3.533	15.143	4	21.667	1.8	7.67	5	0	0	-1	6	0	0	-1	7	25.4	1.8	6.618	8	16.867	0	0
23	1	0	0	-1	2	22.867	2.467	9.737	3	29	4.067	12.298	4	24.8	3.067	11.005	5	13.067	0.867	6.22	6	27.667	1.267	4.378	7	14.533	1	6.438	8	26.8	4.733	15.011
24	1	30.667	4.933	13.858	2	17.4	2.8	13.861	3	14.533	2.2	13.147	4	0	0	-1	5	15.067	2.733	15.356	6	7.067	0	0	7	8.8	0	0	8	36.4	5.6	13.333
25	1	22.933	3	11.568	2	15.733	1.667	9.579	3	23.133	3.333	12.594	4	11.8	0.2	1.667	5	35.6	4.4	11	6	43.133	5.733	11.733	7	50.6	3.667	6.757	8	13.733	1.333	8.85
26	1	21.8	1.733	7.365	2	39.733	4.8	10.778	3	28.2	5.267	15.737	4	33.2	5.733	14.726	5	13.733	2.867	17.269	6	42.133	4.933	10.482	7	0.867	0	-1	8	22.333	2.867	11.376
27	1	32.8	5.533	14.435	2	21.667	4.133	16.021	3	31.067	5.267	14.495	4	42.333	5.067	10.689	5	37.4	4.133	9.952	6	23.067	5.2	18.396	7	48.533	8.467	14.854	8	45.6	8	14.925
28	1	16.2	1.133	6.538	2	36.8	7.067	16.109	3	15.2	1.2	7.317	4	27.267	3.533	11.472	5	39.267	6.467	14.14	6	23.333	2.2	8.616	7	45	4.4	8.907	8	31.267	4.333	12.172
29	1	36.667	6.267	14.596	2	36.8	9.933	21.255	3	45.867	7	13.241	4	16.867	1.6	8.664	5	14.2	4.2	22.826	6	13.733	0.533	3.738	7	0	0	-1	8	35.733	6.467	15.324
30	1	16.733	3.8	18.506	2	37.533	9.733	20.592	3	10.667	2.067	16.23	4	42.267	8.8	17.232	5	32.067	4.8	13.02	6	34.867	4.267	10.903	7	40.267	4.733	10.519	8	31.333	4.067	11.488
31	1	41.2	7.333	15.11	2	18.6	5.533	22.928	3	45.933	6.667	12.674	4	44.933	7.933	15.006	5	35.267	4.533	11.39	6	38.667	9.2	19.22	7	36.733	8.067	18.006	8	47	7.933	14.442
32	1	31.333	8.333	21.008	2	37.8	11.133	22.752	3	33.933	10.733	24.03	4	28.067	6.933	19.81	5	39.4	7.2	15.451	6	32.933	7.2	17.94	7	40.6	4.533	10.044	8	33.333	6.533	16.388
33	1	28.8	6.6	18.644	2	34.067	8.467	19.906	3	42.067	6.2	12.845	4	40.2	8.6	17.623	5	27.533	6.333	18.701	6	21.667	4.2	16.237	7	37.133	9.6	20.542	8	45.133	11.133	19.787
34	1	39.267	12.4	24	2	35.8	9.733	21.376	3	19.8	4.333	17.956	4	23	4.133	15.233	5	42.533	9	17.464	6	36.067	8.267	18.647	7	38.067	7.467	16.398	8	25.8	5.533	17.66
35	1	26.533	7.533	22.114	2	26.333	8.533	24.474	3	32.2	5.8	15.263	4	29.467	5	14.507	5	19.933	2.733	12.059	6	20.933	1.467	6.548	7	35.533	9.533	21.154	8	27.533	4	12.685
36	1	22.933	4.533	16.505	2	25.133	1.333	5.038	3	25.733	9.067	26.054	4	22.667	4.8	17.476	5	39.533	5.8	12.794	6	29.067	3.867	11.741	7	27.333	11.4	29.432	8	25.733	5	16.269
37	1	33.867	9	20.995	2	11.667	3.467	22.907	3	16.933	5	22.796	4	0	0	-1	5	16.333	3.067	15.808	6	5.333	0.8	13.043	7	12.733	0	0	8	16.467	3.8	18.75
38	1	19.867	3.933	16.527	2	0	0	-1	3	11.333	1.867	14.141	4	7.467	0	0	5	13.533	0.333	2.404	6	9.6	2.267	19.101	7	12.267	2.867	18.943	8	9.8	3	23.438
39	1	12.267	3.733	23.333	2	17.4	3.067	14.984	3	12.733	2.667	17.316	4	36.467	4.067	10.033	5	14.867	3.467	18.909	6	39.4	5.333	11.923	7	27.6	2.533	8.407	8	21.733	5.467	20.098
40	1	14	4.6	24.731	2	4	0	-1	3	18.067	3.067	14.511	4	6.067	0	0	5	26.867	3.733	12.2	6	5.267	0	0	7	31.133	4.733	13.197	8	23.067	2.067	8.223
41	1	22.267	4.933	18.137	2	16.8	4.067	19.489	3	9.333	2.6	21.788	4	41.867	8.067	16.155	5	23	4.733	17.067	6	28.267	4.667	14.17	7	21.2	2.067	8.883	8	13.533	1.467	9.778
42	1	21.733	4.8	18.09	2	4.867	0	-1	3	9.867	0.267	2.632	4	0	0	-1	5	8.267	0.533	6.061	6	6.333	0	0	7	23.667	4.467	15.877	8	5.4	0	0
43	1	12.267	2.267	15.596	2	23.333	3.6	13.366	3	28	8	22.222	4	27.933	2.267	7.506	5	40	7.8	16.318	6	40.8	6.267	13.314	7	9.8	2.333	19.231	8	28.4	1.533	5.122
44	1	17.8	4.4	19.82	2	3.533	0	-1	3	13	3.667	22	4	40.2	7.467	15.664	5	18.133	3.667	16.82	6	0	0	-1	7	19.4	2.067	9.627	8	15.267	1.267	7.661
45	1	11.2	1.333	10.638	2	20.267	5	19.789	3	17.2	4.333	20.124	4	13.867	1.533	9.957	5	17.133	3.6	17.363	6	22.733	2	8.086	7	0	0	-1	8	19.733	3.2	13.953
46	1	28.267	4.333	13.292	2	8.067	3.467	30.058	3	18.267	2.067	10.164	4	0	0	-1	5	19.4	2.133	9.907	6	36.067	4.667	11.457	7	36.133	5.2	12.581	8	38.533	6.267	13.988
47	1	19.467	3.533	15.362	2	16.467	1.067	6.084	3	20.6	2.267	9.913	4	34.267	2	5.515	5	19.267	2.6	11.89	6	12.867	0.2	1.531	7	12.667	0	0	8	0	0	-1
48	1	5	2.133	-1	2	10.8	1.6	12.903	3	1.333	0	-1	4	45.467	7.733	14.536	5	16.267	1.733	9.63	6	15.933	2.2	12.132	7	0	0	-1	8	38.933	6.333	13.991
49	1	0.133	0	-1	2	0	0	-1	3	0	0	-1	4	0.2	0	-1	5	2.133	0	-1	6	1.333	0	-1	7	0	0	-1	8	0	0	-1
50	1	0	0	-1	2	0.2	0	-1	3	0	0	-1	4	0.2	0	-1	5	4.267	0	-1	6	0.333	0	-1	7	1.4	0	-1	8	0.267	0	-1
51	1	0	0	-1	2	3.267	0	-1	3	0	0	-1	4	0	0	-1	5	4.6	0.2	-1	6	0	0	-1	7	0	0	-1	8	0.667	0	-1
52	1	0	0	-1	2	0	0	-1	3	0	0	-1	4	4.467	0	-1	5	3.6	0.467	-1	6	0.4	0	-1	7	0.867	0	-1	8	1.2	0	-1
53	1	0	0	-1	2	0	0	-1	3	1.467	0	-1	4	0.133	0	-1	5	0.333	0	-1	6	0.6	0	-1	7	1.2	0	-1	8	0	0	-1
54	1	1.467	0	-1	2	0.2	0	-1	3	1.267	0	-1	4	0	0	-1	5	0.867	0	-1	6	0.4	0	-1	7	0.733	0	-1	8	0	0	-1
55	1	4.667	0.467	-1	2	39.667	5.933	13.012	3	30.6	3.733	10.874	4	36.6	5	12.019	5	28.533	4.667	14.056	6	39.2	1.267	3.13	7	20.533	3.067	12.994	8	30.8	4.933	13.806
56	1	47.533	7.2	13.155	2	45.333	8.933	16.462	3	46.267	6.733	12.704	4	49.267	8.333	14.468	5	41.8	7.667	15.499	6	47.733	7.867	14.149	7	52.133	6.4	10.934	8	52.533	5.867	10.046
57	1	15.867	3.067	16.197	2	24.6	7.733	23.918	3	36.733	7.267	16.515	4	45.933	7.267	13.659	5	20.133	3	12.968	6	26.6	2.467	8.486	7	49.267	8.733	15.057	8	49.6	8.733	14.971
58	1	36	6.333	14.961	2	41.867	11	20.807	3	46.733	6.267	11.824	4	29.067	7.2	19.853	5	29.267	3.8	11.492	6	45.4	10.8	19.217	7	30.2	9.667	24.247	8	32.533	4	10.949
59	1	36.667	8.333	18.519	2	17.267	3.2	15.635	3	28.6	5.133	15.217	4	33.133	9.267	21.855	5	31.933	5.333	14.311	6	22.867	2.333	9.259	7	29	4.4	13.174	8	36.867	6.467	14.923
60	1	22.733	10.667	31.936	2	42.933	8.467	16.472	3	18.4	3.867	17.365	4	44.2	9.667	17.946	5	34.467	7.467	17.806	6	36.2	6.733	15.683	7	43.067	6.267	12.703	8	25.667	2.267	8.115
61	1	34	12.133	26.301	2	11.2	4.467	28.511	3	17.467	4	18.634	4	9.4	0	0	5	19.333	4.4	18.539	6	18.667	3.067	14.11	7	24.4	4.133	14.486	8	11.333	0.267	2.299
62	1	19.4	6.6	25.385	2	14	2.533	15.323	3	13.533	1.2	8.145	4	12	0.933	7.216	5	26.067	4.4	14.442	6	26.667	5	15.789	7	19.933	2.4	10.746	8	20.533	5	19.582
63	1	20.333	5.267	20.573	2	15.067	2.867	15.985	3	17.667	3.733	17.445	4	19.4	1.733	8.202	5	17.067	2.933	14.667	6	24.333	4.533	15.704	7	20.333	3.067	13.105	8	26.4	4.2	13.725
64	1	12.4	3.533	22.176	2	10.333	0.6	5.488	3	14.267	1.6	10.084	4	37.8	8.4	18.182	5	21.667	5	18.75	6	13.8	2	12.658	7	20.867	2	8.746	8	10.733	1.133	9.551
65	1	25.133	5.067	16.777	2	4.533	0	-1	3	10.8	1.933	15.183	4	29.4	5.467	15.679	5	5.467	1.2	18	6	38.467	7.2	15.766	7	21.133	7.067	25.059	8	28.533	3.8	11.753
66	1	3.8	3.867	-1	2	14.533	3.8	20.727	3	19.667	5.467	21.751	4	18.467	5.6	23.269	5	24.667	7.267	22.756	6	22.933	3.067	11.795	7	17.6	2.533	12.583	8	22.533	5	18.16
67	1	21.533	4.067	15.885	2	27.933	7.867	21.974	3	4.333	1.267	-1	4	39.6	5.933	13.031	5	8.8	0.133	1.493	6	26.867	3.667	12.009	7	30.267	4	11.673	8	33.333	4.133	11.032
68	1	14.4	3.8	20.879	2	8.667	1.133	11.565	3	10.933	1.667	13.228	4	10.933	0.933	7.865	5	24	6.8	22.078	6	17.6	4	18.519	7	8.467	0.667	7.299	8	19.333	4.2	17.847
69	1	23.733	5.267	18.161	2	17.867	3.933	18.043	3	32.8	5.6	14.583	4	30.4	6.133	16.788	5	10.8	2.867	20.976	6	26.533	2.533	8.716	7	32.8	4.2	11.351	8	23.267	3.2	12.091
70	1	20.6	2.533	10.951	2	13.067	1.933	12.889	3	27.4	5.6	16.97	4	0	0	-1	5	32.267	5.6	14.789	6	20.467	1.067	4.954	7	1.8	0.467	-1	8	18.8	2.4	11.321
71	1	1.533	0.867	-1	2	19.6	3.267	14.286	3	0	0	-1	4	0.533	0	-1	5	14.467	0.733	4.825	6	9.333	1.067	10.256	7	3.333	0	-1	8	29.4	3.2	9.816
72	1	0	0	-1	2	36.2	8.067	18.223	3	30.4	5.333	14.925	4	10.6	0	0	5	27.267	4.733	14.792	6	0	0	-1	7	33.867	3.867	10.247	8	41.4	8	16.194
73	1	29.933	3.667	10.913	2	8.4	0.267	3.077	3	8.467	1.133	11.806	4	48.733	8.267	14.503	5	4.333	0	-1	6	27.133	2.533	8.539	7	23.667	2.467	9.439	8	23.867	2.4	9.137
74	1	5.733	2.6	31.2	2	23.133	1.6	6.469	3	41.4	6.867	14.227	4	16.133	0.467	2.811	5	47.8	7.333	13.301	6	46.533	4.2	8.279	7	46.6	5.933	11.294	8	41.867	5.867	12.291
75	1	39.133	5.067	11.463	2	41.133	7.333	15.131	3	13.8	0.067	0.481	4	37.733	3.867	9.295	5	15.733	0.2	1.255	6	7.4	2.733	26.974	7	22.067	3.467	13.577	8	17.533	3.2	15.434
76	1	4.133	2.267	-1	2	24.667	6.067	19.74	3	36.133	7.733	17.629	4	36.133	7.533	17.252	5	26.267	5.867	18.257	6	49.2	5.667	10.328	7	34.4	4.533	11.644	8	44.933	9.067	16.79
77	1	40	7	14.894	2	32.533	4.8	12.857	3	15.667	1.6	9.266	4	32.6	4.4	11.892	5	19.467	2.067	9.598	6	42.133	7	14.247	7	5.733	0	0	8	42.333	7.933	15.782
78	1	26.733	8.067	23.18	2	36.133	12.2	25.241	3	43.4	8.6	16.538	4	41.467	7.867	15.946	5	25.2	6.067	19.403	6	20.867	4.8	18.701	7	47.067	8	14.528	8	18.4	3.133	14.551
79	1	33.333	11.533	25.706	2	32.333	6.133	15.945	3	17.933	3.133	14.873	4	19.467	4.733	19.559	5	49.467	4.067	7.597	6	29.667	4.667	13.592	7	40.4	10	19.841	8	45.2	6.867	13.188
80	1	10.467	2.933	21.891	2	34	14.733	30.233	3	44.333	8.067	15.394	4	33.867	9.867	22.561	5	10.533	3.4	24.402	6	38.067	10.2	21.133	7	25.267	3.733	12.874	8	34.4	6.2	15.271
81	1	38.533	10.733	21.786	2	27.533	5.6	16.901	3	33.667	5	12.931	4	38.867	12	23.591	5	45.4	9.533	17.354	6	43	8.467	16.451	7	42.667	12.133	22.141	8	43.8	10.733	19.682
82	1	24.8	10.867	30.467	2	26.867	7.467	21.748	3	30.467	6.267	17.06	4	31.4	4.267	11.963	5	21.667	5.067	18.953	6	31.933	9.533	22.99	7	35.8	4.733	11.678	8	24.867	2.933	10.552
83	1	25.4	8.467	25	2	20.2	4.867	19.415	3	34	6.6	16.256	4	27.733	4.133	12.971	5	47.133	8.933	15.933	6	23.133	3.333	12.594	7	32.6	7.667	19.04	8	25.6	7.2	21.951
84	1	26	6.467	19.918	2	24.267	5.867	19.469	3	26.867	3.8	12.391	4	26.533	5	15.856	5	18.4	1.933	9.508	6	21.667	4.733	17.929	7	33.267	4.2	11.21	8	32.8	2.333	6.641
85	1	20.6	6.133	22.943	2	11.867	5.2	30.469	3	11.2	3.867	25.664	4	2.533	0.867	-1	5	17	5.467	24.332	6	15.8	2.067	11.567	7	19.4	7.4	27.612	8	12.2	1.867	13.27
86	1	13.2	3.733	22.047	2	10.133	4.267	29.63	3	10.467	0	0	4	6.4	0	0	5	12.4	1.533	11.005	6	7.2	0	0	7	16.4	1.267	7.17	8	8.667	0	0
87	1	12.933	2	13.393	2	8.333	0.4	4.58	3	16.067	1.933	10.741	4	20.133	2.733	11.953	5	11.2	0.933	7.692	6	15.2	1.6	9.524	7	11.933	0.667	5.291	8	19.8	1.733	8.05
88	1	17.2	5.067	22.754	2	14.533	2.467	14.51	3	8.733	0.933	9.655	4	15.933	1.733	9.811	5	11.067	3.733	25.225	6	0.267	0	-1	7	29.8	3.733	11.133	8	7.8	1.4	15.217
89	1	7.533	1.6	17.518	2	0.2	0	-1	3	4.267	0.4	-1	4	30	4.133	12.109	5	31.467	6.667	17.483	6	17.133	0.8	4.461	7	8.067	3.733	31.638	8	37.533	5.4	12.578
90	1	16	3.2	16.667	2	25.667	6.4	19.958	3	22	3.933	15.167	4	24.2	1.133	4.474	5	0	0	-1	6	19.667	3.8	16.193	7	20	1.4	6.542	8	3.267	0	-1
91	1	13.333	1.867	12.281	2	10.2	2.267	18.182	3	17.667	3.2	15.335	4	27.133	5.8	17.611	5	28.933	6.2	17.647	6	13.467	3.267	19.522	7	9.4	0.267	2.759	8	45.267	6.733	12.949
92	1	20.467	4.4	17.694	2	18.533	4	17.751	3	22.933	4.933	17.703	4	15.933	2.6	14.029	5	30.067	5.067	14.421	6	35.867	3.4	8.659	7	30.2	3.667	10.827	8	0	0	-1
93	1	11.867	2.133	15.238	2	22.067	4.733	17.662	3	21.333	3.267	13.279	4	10.667	1.067	9.091	5	2	0	-1	6	8.867	3.267	26.923	7	16.067	2.2	12.044	8	30.4	1.8	5.59
94	1	16	2.267	12.409	2	9.133	0.333	3.521	3	6.6	0	0	4	0	0	-1	5	33.533	4.933	12.825	6	14.533	2.133	12.8	7	21.933	2.667	10.84	8	9.533	1.4	12.805
95	1	1.733	0	-1	2	11	0.333	2.941	3	22.933	2.2	8.753	4	0	0	-1	5	4.467	1.933	-1	6	3.933	0	-1	7	3.733	0	-1	8	21.733	4.133	15.979
96	1	22.467	3.067	12.01	2	20.267	4.667	18.717	3	5.733	0	0	4	3.533	0	-1	5	18.467	1.2	6.102	6	47.8	6.4	11.808	7	13.2	2.067	13.537	8	33.267	5.067	13.217
NREM and REMS values in min/hr recording time
R/N% values represent the percentage of REMS out of total sleep (NREMS+REMS) in a given hour. RN% in hours with less than 5 min of NREMS are deemed insufficient to reliably estimate the R/N% are set to -1.0; i.e., missing values.
Grey area reflects sleep deprivation

## Sheet: B
day	ZT [h]	mouse	NREMS [min]	REMS [min]	mouse	NREMS [min]	REMS [min]	mouse	NREMS [min]	REMS [min]	mouse	NREMS [min]	REMS [min]	mouse	NREMS [min]	REMS [min]	mouse	NREMS [min]	REMS [min]	mouse	NREMS [min]	REMS [min]	mouse	NREMS [min]	REMS [min]
3	6	1	0	0	2	0	0	3	0	0	4	0	0	5	0	0	6	0	0	7	0	0	8	0	0
3	7	1	-22.233	-4.267	2	15.5	-0.267	3	-9.033	-3.933	4	-1.6	-4	5	-10.367	-2.267	6	-0.3	-7.233	7	-20.233	-5.9	8	-9.8	-3.233
3	8	1	-5.867	-4.233	2	23.167	-0.467	3	7.433	-4.867	4	15.033	-4.4	5	-2.067	-1.133	6	14.133	-5.333	7	-5.433	-5.1	8	10.4	-3.067
3	9	1	-24.4	-9.933	2	15.4	-2.6	3	6.533	-5.367	4	19.9	-5.633	5	-12.467	-4.2	6	11.767	-7.733	7	8.4	-5.333	8	13.667	-4.233
3	10	1	-18.833	-13.433	2	28.467	0.8	3	27.2	-3.933	4	27.2	-1.6	5	-20.4	-6.933	6	21.867	-4.233	7	-3.767	-3.533	8	13.667	-5.933
3	11	1	-12.667	-14.267	2	17.1	-2.8	3	28.433	-3.667	4	28.267	2.4	5	-18	-8.667	6	25.2	-5.4	7	-6.633	-6.7	8	29.933	-3.4
3	12	1	-16.5	-9.933	2	38.3	3.467	3	22.667	-7.633	4	57.5	8.4	5	-5	-4.1	6	36.2	-3.567	7	1.933	-11.467	8	25.533	-6.5
3	13	1	-11.433	-5.4	2	38.933	5.633	3	22.967	-8.467	4	56.367	7.1	5	-7.233	-3.967	6	45.567	-2.167	7	10.6	-8.433	8	21.6	-9.3
3	14	1	-15.167	-3.233	2	48.133	7.933	3	28	-8.533	4	64.633	8.033	5	6.9	-0.733	6	66.133	1.7	7	19.333	-8.1	8	29.033	-7.067
3	15	1	-6.533	-0.367	2	53.367	9.267	3	33.867	-8.467	4	52.433	5.533	5	5.733	-1.733	6	52.1	1.133	7	12.467	-7.567	8	38.467	-6.067
3	16	1	-8.633	-0.2	2	52.4	8.533	3	31.8	-9.8	4	75.8	10.933	5	8.1	0.967	6	61.6	3.133	7	4.567	-9.133	8	35.833	-5.967
3	17	1	-6	0	2	38.7	4.8	3	31.367	-10.533	4	84.267	12.367	5	-13.7	-3.533	6	65.2	5.567	7	8.9	-3.8	8	45.033	-4.233
3	18	1	-20.333	-0.833	2	50.8	8.6	3	41.467	-6.133	4	89.967	17.033	5	0.633	0.733	6	84.267	8.633	7	2.133	-5.767	8	64.867	0.767
3	19	1	-10.9	1.233	2	57.967	13.533	3	18	-11.533	4	96.567	19.333	5	-25.9	-5.2	6	71.333	5.267	7	11.6	-4.5	8	63.933	1.867
3	20	1	-21.833	0.533	2	55.133	12.6	3	17.767	-11.967	4	70.367	14.067	5	-13.5	-0.233	6	84.7	9.267	7	7.933	-4.867	8	71.567	5.433
3	21	1	-3.7	5.133	2	60.6	14.033	3	32.767	-9.967	4	93.833	19.433	5	-35.7	-2.833	6	88.467	10.1	7	40.733	-0.667	8	67.867	4.667
3	22	1	-10.833	4.167	2	61.367	12.967	3	41.133	-7.167	4	83	18.533	5	-13.133	1.7	6	90.9	8.833	7	11.767	-3.7	8	58.967	3.933
3	23	1	-19.033	3.267	2	61.3	14.467	3	16.333	-10.333	4	54	16	5	-14.833	0.7	6	79.967	9.167	7	1.5	-4.2	8	74.967	4.767
3	24	1	-36.867	-0.267	2	83.4	20.333	3	38.8	-6.1	4	41.867	12.133	5	-3.233	3.2	6	68.467	8.067	7	30.967	-0.333	8	78.7	6.8
4	0	1	0	0	2	0	0	3	0	0	4	0	0	5	0	0	6	0	0	7	0	0	8	0	0
4	1	1	3.867	-0.567	2	-12.233	-2.433	3	-17.867	-2.633	4	21.7	5.7	5	-27.767	-3.467	6	0.367	-1.267	7	-7.5	-0.067	8	-0.767	-0.467
4	2	1	-11.667	-0.467	2	-24.033	-6.167	3	-6.767	-1	4	12.333	2.3	5	3.367	0.667	6	2.1	-2.433	7	13.867	3.233	8	17.8	1.733
4	3	1	-8.267	-0.633	2	-9.267	-3.567	3	-19.833	-5.667	4	8.2	1.133	5	-14.4	-3.233	6	-24.667	-4.933	7	6.433	1.533	8	-2.733	-2.367
4	4	1	-21.2	-0.633	2	-23.233	-5.667	3	0.233	1.233	4	15.1	1.9	5	-15.433	-1.667	6	-3.9	-1.767	7	-4.933	1.567	8	7.5	2.733
4	5	1	-17.533	-0.933	2	-21.1	-7.733	3	-25.467	-3.667	4	19.267	1.867	5	-23.333	-6.433	6	18.933	4.567	7	-19.767	-2.033	8	20.033	5.3
4	6	1	-17.5	0.2	2	-23.4	-5.567	3	-6.633	-0.333	4	31.467	4.467	5	-21.067	-4.167	6	-1.133	4.267	7	-9.333	1.9	8	-1.133	3.033
4	7	1	-11.067	7	2	-15.233	-5.633	3	-28.333	-4.867	4	12.733	0.2	5	-10.5	-7.033	6	-10.967	0.433	7	-9.7	2.933	8	3.467	1.733
4	8	1	-31.767	2.767	2	-18.9	-0.033	3	-13.8	-4.467	4	13.967	1.333	5	-33.467	-10.167	6	-6.2	4.667	7	-21.767	1.067	8	5.533	2.233
4	9	1	-27.633	4.733	2	-23.733	-4.3	3	-17.767	-7.233	4	11.767	4.833	5	-18.6	-6.7	6	7.833	8.267	7	-14.533	4.233	8	3	3.067
4	10	1	-33.267	5.767	2	-25.667	-4.433	3	-13.367	-5.8	4	21.4	5.933	5	-34.133	-8.167	6	4.467	10.5	7	-21.1	1.1	8	-4.667	0.3
4	11	1	-38.367	5.067	2	-34.1	-6.367	3	-6.733	-4.067	4	17.067	4.8	5	-16.533	-6.3	6	8.067	10.333	7	-20.367	1.2	8	0.333	3.567
4	12	1	-38.933	5.2	2	-31.567	-2.7	3	-4.033	-8.1	4	28.633	6.133	5	-19.6	-7.267	6	4.533	10.167	7	-21.6	-5.633	8	3.067	0.533
4	13	1	-47.267	3.733	2	-30.267	0.2	3	-10	-9.067	4	20.633	5.7	5	-24.167	-6.067	6	11.033	10.567	7	-17.933	0.667	8	0	-0.667
4	14	1	-57.2	3.033	2	-24.933	4.233	3	-8.033	-10.333	4	23.3	5.7	5	-23.7	-5.7	6	12.133	9.433	7	-12.733	-0.133	8	-4.433	-3.433
4	15	1	-55.967	2.633	2	-26.433	3.1	3	-3.767	-12.067	4	11.833	4.2	5	-30.733	-8.7	6	-11.033	5.933	7	-28	-2	8	-1.6	-4.9
4	16	1	-53.267	4.333	2	-23.2	4.233	3	-11.367	-14.067	4	13.333	2.933	5	-38.967	-7.267	6	-15.067	5.933	7	-26.967	-1.833	8	-7.167	-4.533
4	17	1	-68.233	1.067	2	-41.233	0.5	3	-18.333	-16.333	4	22.4	3.033	5	-34.767	-6.3	6	-32.8	1.967	7	-35.7	0.167	8	11.033	-1.2
4	18	1	-70.367	-0.433	2	-18	6.9	3	-5.9	-13.467	4	33.833	3.233	5	-45.1	-9.3	6	-17	5.767	7	-40.067	-2.933	8	11.6	-1.2
4	19	1	-69.133	-0.567	2	-28.567	6.233	3	-16.033	-16.933	4	27.967	5.4	5	-51.5	-9.167	6	-43.333	2	7	-51.467	-5.4	8	22.6	2.5
4	20	1	-74	-0.667	2	-21.533	8.167	3	-4.267	-14.1	4	6.767	1.8	5	-33.033	-5.933	6	-11.7	5.4	7	-33.4	-2.767	8	10.9	1.867
4	21	1	-67.733	0.8	2	-11.867	10.4	3	-0.733	-14.433	4	10.5	2.1	5	-64.033	-11.4	6	-25.6	6.967	7	-17.333	-0.567	8	14.333	-0.3
4	22	1	-79.467	-0.433	2	-15.033	7.733	3	-13.167	-17.233	4	-0.333	1.2	5	-40.2	-7.533	6	-29.1	6.767	7	-26.167	-1.4	8	-3.833	-2.033
4	23	1	-87.467	-2.2	2	-23.7	6.3	3	-15.033	-18.2	4	-29.867	-1.333	5	-51.9	-7.333	6	-45.433	6.033	7	-36.033	-1.9	8	4.5	-0.267
4	24	1	-82.833	-2.667	2	-17.533	8.767	3	-17.233	-19.3	4	-49.067	-5.2	5	-49.1	-8.367	6	-9.133	11.333	7	-27.233	0.167	8	0.1	-1.167
NREM sleep and REM sleep as accumulated differences from mean baseline levels (baseline 1 + 2) in corresponding times of day expressed in minutes.
Day 3 = recovery day 1; day 4 = recovery day 2. Recovery was reset to 0 at the end of day 3.

## Sheet: C
day	light(1)/dark(2)	quantile	mouse	average time of quantile [ZT]	EEG delta power [%]	mouse	average time of quantile [ZT]	EEG delta power [%]	mouse	average time of quantile [ZT]	EEG delta power [%]	mouse	average time of quantile [ZT]	EEG delta power [%]	mouse	average time of quantile [ZT]	EEG delta power [%]	mouse	average time of quantile [ZT]	EEG delta power [%]	mouse	average time of quantile [ZT]	EEG delta power [%]	mouse	average time of quantile [ZT]	EEG delta power [%]
1	1	1	1	0.3139	175.994	2	0.7631	208.703	3	0.263	177.859	4	0.3365	164.534	5	0.3027	172.331	6	1.105	156.443	7	1.0934	200.971	8	0.6125	181.957
1	1	2	1	1.8041	153.301	2	1.5539	164.567	3	1.4058	153.242	4	1.0758	148.979	5	1.652	131.771	6	1.7499	134.132	7	1.7708	160.909	8	1.6963	168.693
1	1	3	1	2.5134	158.072	2	2.7321	139.268	3	2.1386	138.15	4	2.3847	160.351	5	2.7359	153.941	6	2.4698	120.996	7	3.2222	160.045	8	2.6835	152.126
1	1	4	1	3.7667	135.284	2	3.4533	147.112	3	3.8485	141.026	4	3.0992	144.26	5	3.7573	136.786	6	3.3327	107.581	7	4.046	146.744	8	3.7703	150.535
1	1	5	1	4.6173	144.906	2	4.0684	145.577	3	4.5838	132.325	4	4.0149	130.093	5	4.674	134.379	6	4.1825	95.2861	7	4.9104	127.318	8	4.9361	155.722
1	1	6	1	5.4523	120.288	2	5.229	126.801	3	5.405	120.199	4	4.821	133.026	5	5.6444	121.899	6	5.2999	125.969	7	5.9573	121.202	8	5.639	146.179
1	1	7	1	6.5773	110.236	2	5.9859	133.917	3	6.1565	104.973	4	6.1026	132.233	5	6.6006	109.466	6	5.9764	104.284	7	6.7874	125.435	8	6.5511	131.182
1	1	8	1	7.8237	130.95	2	6.8092	113.801	3	7.2475	111.024	4	7.1676	116.13	5	7.4484	109.336	6	6.7965	102.071	7	7.8065	91.3955	8	7.3587	131.079
1	1	9	1	8.5404	108.205	2	7.7691	97.1591	3	8.1722	113.733	4	7.9626	106.485	5	8.3521	110.162	6	7.6878	98.7824	7	8.6788	105.115	8	8.3523	110.821
1	1	10	1	9.6015	90.4061	2	8.7796	93.1076	3	9.0195	100.939	4	8.702	100.317	5	9.0645	99.5331	6	8.7049	100.43	7	9.5932	115.272	8	9.1287	100.063
1	1	11	1	10.5468	91.2071	2	9.9874	93.325	3	9.8473	87.5237	4	9.8253	96.0635	5	9.9198	97.2013	6	9.5697	91.2131	7	10.4182	85.6913	8	10.0983	92.2451
1	1	12	1	11.4973	79.3388	2	11.108	95.4252	3	11.0916	91.1826	4	10.8444	98.7101	5	10.8583	97.4035	6	11.011	104.335	7	11.5588	99.9544	8	11.36	106.063
1	2	13	1	12.7057	101.105	2	13.7813	103.321	3	13.5988	93.3454	4	13.356	120.281	5	12.7586	97.8508	6	13.6511	119.483	7	13.1259	102.539	8	13.5681	86.952
1	2	14	1	14.4861	96.3924	2	16.0629	159.621	3	16.2926	133.082	4	15.2788	132.044	5	14.9998	92.1393	6	15.3706	122.951	7	14.7348	111.859	8	16.7494	121.617
1	2	15	1	16.6925	102.204	2	18.2584	172.691	3	18.6164	131.16	4	17.8909	159.23	5	16.8354	109.163	6	16.766	121.276	7	16.4512	128.656	8	18.7483	159.607
1	2	16	1	18.7876	137.174	2	20.3213	169.479	3	20.0877	124.805	4	18.7407	131.366	5	18.8688	115.979	6	18.4795	143.786	7	18.0385	146.908	8	20.5176	127.977
1	2	17	1	20.8232	151.345	2	22.1005	163.927	3	21.9615	136.538	4	20.2034	121.375	5	20.4348	158.016	6	20.0686	122.296	7	20.1946	176.405	8	22.1978	144.569
1	2	18	1	23.1899	146.946	2	23.4711	158.887	3	23.2777	144.077	4	22.1492	147.584	5	22.5983	137.333	6	22.7796	137.887	7	22.5206	196.268	8	23.3759	172.433
2	1	19	1	0.7551	169.136	2	0.842	180.087	3	0.7901	176.357	4	1.1181	151.87	5	0.345	139.95	6	0.3351	156.383	7	0.31	187.982	8	1.08	178.65
2	1	20	1	1.5443	146.356	2	1.6817	160.735	3	1.6586	148.582	4	1.9897	147.308	5	1.8326	148.867	6	0.9892	147.648	7	1.4179	157.094	8	2.2562	183.572
2	1	21	1	2.7591	146.943	2	2.9098	162.576	3	2.8157	162.29	4	2.6851	122.291	5	2.6987	132.303	6	1.6483	128.416	7	2.6342	163.27	8	2.9586	171.786
2	1	22	1	4.0169	121.642	2	3.7924	142.754	3	3.9129	129.123	4	3.622	121.47	5	3.6876	116.569	6	2.54	114.034	7	3.3083	132.998	8	3.9585	156.475
2	1	23	1	4.8305	128.866	2	4.6584	149.086	3	4.7238	120.01	4	5.0738	127.993	5	4.8924	133.727	6	4.1073	111.407	7	4.7283	156.901	8	4.8853	143.215
2	1	24	1	5.9536	114.555	2	5.473	136.105	3	5.9459	135.891	4	5.7642	125.043	5	6.006	142.588	6	5.3468	122.063	7	5.9237	149.024	8	5.8908	167.375
2	1	25	1	6.8466	131.621	2	6.6265	110.895	3	6.6783	126.51	4	6.4508	115.365	5	6.8902	111.417	6	6.2528	115.682	7	6.7341	123.614	8	6.4984	128.108
2	1	26	1	7.6617	119.754	2	7.5776	136.36	3	7.477	107.999	4	7.1558	116.993	5	7.6647	97.8616	6	7.0448	116.79	7	7.696	113.656	8	7.1668	122.842
2	1	27	1	8.5447	105.676	2	8.3491	124.952	3	8.2248	107.352	4	8.2416	97.415	5	8.5524	102.881	6	7.9619	110.22	7	8.5116	100.06	8	8.109	124.005
2	1	28	1	9.5075	102.963	2	9.2871	101.421	3	9.1687	96.501	4	8.9709	105.936	5	9.5435	104.001	6	9.1789	107.841	7	9.3801	104.455	8	9.012	98.2996
2	1	29	1	10.368	108.103	2	10.2792	101.335	3	10.2886	112.659	4	10.0612	98.6083	5	10.7916	94.54	6	10.1391	94.0752	7	10.3153	98.1799	8	10.1262	88.4943
2	1	30	1	11.2655	103.761	2	11.4318	94.6031	3	11.2676	91.3061	4	11.1995	97.6331	5	11.5252	96.5556	6	11.4713	97.6431	7	11.461	96.3724	8	11.2279	92.7573
2	2	31	1	12.4534	91.9638	2	13.2679	117.619	3	13.1487	91.0477	4	14.3324	119.305	5	13.5306	95.2081	6	13.808	121.877	7	13.3466	102.127	8	13.2268	85.0536
2	2	32	1	13.9917	92.3168	2	15.8849	123.369	3	15.5088	111.485	4	16.3982	135.637	5	15.4932	108.436	6	15.5244	129.182	7	14.9275	119.915	8	15.5204	113.264
2	2	33	1	16.2594	128.519	2	18.3527	186.466	3	17.7947	138.546	4	18.5482	138.737	5	17.5039	108.754	6	17.6252	131.202	7	16.2989	117.995	8	18.1632	131.97
2	2	34	1	18.3932	142.859	2	19.9121	181.039	3	19.4562	140.551	4	19.6801	139.635	5	19.0782	144.067	6	19.5012	132.46	7	17.9451	124.924	8	20.2083	120.778
2	2	35	1	20.6153	148.795	2	21.4183	192.941	3	20.9772	173.082	4	22.4529	163.712	5	20.754	132.132	6	21.2114	134.383	7	20.3902	167.562	8	21.6619	184.074
2	2	36	1	22.3714	145.239	2	23.0047	169.57	3	22.3778	156.567	4	23.5417	145.497	5	22.814	142.468	6	22.8592	131.642	7	21.9308	196.543	8	23.4635	164.799
3	1	37	1	7.1105	257.112	2	6.4356	318.711	3	6.6362	263.928	4	6.589	223.465	5	6.6659	237.887	6	6.5249	193.66	7	6.6251	253.223	8	6.674	301.667
3	1	38	1	7.5051	220.632	2	6.9211	244.313	3	7.1663	212.631	4	7.1984	180.887	5	7.1144	197.823	6	7.0535	159.63	7	7.3975	193.803	8	7.2122	243.771
3	1	39	1	7.9132	195.008	2	7.4272	208.765	3	7.6902	178.083	4	7.7832	171.435	5	7.6049	165.487	6	7.609	144.681	7	7.931	169.887	8	7.7557	216.528
3	1	40	1	8.8001	159.137	2	8.0239	184.323	3	8.351	131.076	4	8.4191	144.654	5	8.7237	124.615	6	8.1707	130.775	7	8.497	134.518	8	8.3357	190.165
3	1	41	1	9.6523	161.674	2	9.0607	163.645	3	9.0458	135.259	4	9.2295	120.2	5	9.6777	117.807	6	9.2123	131.982	7	9.2725	147.112	8	8.8704	151.947
3	1	42	1	10.1029	158.207	2	9.8288	147.69	3	9.6125	145.519	4	10.0821	120.721	5	10.212	130.971	6	9.7677	112.687	7	10.0041	137.917	8	9.461	159.315
3	1	43	1	10.7655	129.699	2	10.8283	149.614	3	10.4833	123.483	4	10.8682	107.383	5	10.9514	120.061	6	10.7365	119.578	7	10.9534	112.851	8	10.5876	133.602
3	1	44	1	11.3689	126.835	2	11.6167	127.605	3	11.4897	116.956	4	11.685	108.891	5	11.7731	134.098	6	11.518	116.859	7	11.5805	99.5663	8	11.5391	128.845
3	2	45	1	12.403	127.526	2	13.3959	118.073	3	12.6977	118.77	4	13.6255	99.4356	5	12.9985	93.1989	6	12.9315	115.03	7	12.9216	104.873	8	13.37	113.493
3	2	46	1	13.7744	115.61	2	16.1558	132.632	3	15.0958	115.724	4	15.3104	121.103	5	15.0048	100.07	6	14.6693	113.382	7	14.8645	107.661	8	15.8301	129.891
3	2	47	1	15.6524	108.832	2	18.5474	127.737	3	17.7076	146.787	4	16.5348	108.62	5	17.2132	109.908	6	16.5089	112.448	7	16.6106	122.377	8	17.898	140.16
3	2	48	1	17.5658	117.514	2	20.8372	149.941	3	20.4192	163.735	4	17.7909	105.483	5	19.5375	123.203	6	18.195	117.021	7	18.4581	127.038	8	19.79	128.714
3	2	49	1	19.8016	144.89	2	22.8024	166.774	3	21.3513	154.409	4	19.1802	108.634	5	21.6104	136.864	6	19.6016	113.428	7	20.4576	145.141	8	21.8618	120.389
3	2	50	1	21.3033	124.477	2	23.4967	162.386	3	23.7021	177.214	4	21.3274	126.602	5	23.2538	124.177	6	21.5512	112.659	7	23.2264	166.395	8	23.3839	145.155
4	1	51	1	0.602	194.84	2	1.3075	126.964	3	0.9787	152.425	4	0.3143	157.96	5	1.1555	140.862	6	0.7478	144.076	7	0.8717	165.521	8	0.8671	135.647
4	1	52	1	1.4247	169.93	2	2.3337	123.015	3	2.1607	139.645	4	0.9377	147.428	5	1.7828	131.81	6	1.4385	125.771	7	1.5491	114.375	8	1.6233	110.971
4	1	53	1	2.5517	143.467	2	3.0391	118.131	3	3.248	130.922	4	2.4078	139.857	5	2.8517	111.615	6	2.6242	113.276	7	2.3466	94.5682	8	2.5963	114.957
4	1	54	1	3.7626	126.342	2	4.0458	104.218	3	4.438	127.695	4	3.1679	135.966	5	4.1968	120.106	6	3.6035	112.531	7	3.7102	127.773	8	3.6757	110.001
4	1	55	1	4.7115	125.948	2	4.9485	128.743	3	5.39	128.042	4	4.1764	109.742	5	5.6186	118.583	6	4.2744	99.4661	7	5.2882	136.196	8	4.4927	100.3
4	1	56	1	5.5804	103.6	2	5.6113	96.9549	3	6.2341	119.724	4	5.0567	115.236	5	6.2426	117.728	6	5.0366	94.0324	7	5.9834	103.453	8	5.3157	94.6112
4	1	57	1	6.4082	105.793	2	6.6031	99.8741	3	7.3245	121.364	4	5.9443	99.3149	5	6.7995	101.014	6	6.5082	112.62	7	6.8461	104.882	8	6.5466	104.85
4	1	58	1	7.6383	100.387	2	7.355	100.249	3	8.0157	106.397	4	7.203	97.736	5	8.1754	99.7393	6	7.323	102.895	7	7.9756	112.727	8	7.3904	83.9048
4	1	59	1	8.5674	112.192	2	8.2789	86.749	3	8.8822	88.7184	4	8.1585	93.8	5	8.8048	100.38	6	8.0999	100.163	7	8.6807	85.8304	8	8.2812	86.9328
4	1	60	1	9.3552	85.4021	2	9.079	83.9614	3	9.5868	88.9613	4	9.0317	95.5305	5	9.5855	69.2861	6	8.9258	88.0975	7	9.6013	80.2289	8	9.1978	86.6253
4	1	61	1	10.2845	83.8301	2	10.2356	91.6763	3	10.6524	94.5374	4	10.106	93.5713	5	10.5191	101.977	6	9.8907	83.6729	7	10.5028	88.7528	8	10.1933	97.0088
4	1	62	1	11.5656	77.9443	2	11.3728	84.4156	3	11.5786	91.127	4	11.4781	86.7081	5	11.2998	80.9782	6	11.3672	99.822	7	11.425	88.1765	8	11.4561	85.9887
4	2	63	1	12.8663	85.683	2	13.2514	113.476	3	13.2538	98.896	4	13.915	98.0698	5	13.0068	92.4412	6	13.3662	98.1978	7	12.9102	96.1461	8	13.7714	81.7358
4	2	64	1	14.9007	102.375	2	15.9733	153.857	3	16.078	126.899	4	15.7663	109.418	5	15.6871	111.578	6	16.5202	115.159	7	14.9201	120.815	8	16.0607	138.547
4	2	65	1	17.3311	135.849	2	18.0608	161.589	3	18.2265	166.595	4	16.6822	118.528	5	17.6108	116.07	6	18.769	143.369	7	16.6678	124.68	8	17.9766	143.863
4	2	66	1	19.3018	145.56	2	19.6368	176.79	3	19.2137	168.257	4	17.8209	109.619	5	19.112	130.038	6	20.0947	130.796	7	18.8326	140.389	8	19.7334	146.305
4	2	67	1	20.7432	134.819	2	21.2813	150.699	3	20.8817	142.167	4	18.7197	121.133	5	21.1133	147.952	6	22.4028	137.456	7	20.4075	153.419	8	21.7907	122.36
4	2	68	1	23.0599	161.241	2	23.2005	175.655	3	22.9522	167.197	4	20.3335	108.911	5	22.8227	142.909	6	23.6667	138.519	7	22.1962	157.91	8	23.3351	155.022
EEG delta power values are averaged over quantiles of EEG artefact free time spent in NREM sleep
average time of quantile [ZT] is the average time the NREM sleep epochs occurred in a given quantile; in graph EEG delta power is plotted at average time in quantile of all 8 mice; ZT0 = light-onset; ZT12 = dark onset
Number of NREM sleep quantiles: 12 in the light periods (except of day 3: 8) and 6 in the dark period
EEG delta power values are expressed as % of the average EEG delta power level reached over the last 4h of the the 2 baseline light periods
days 1 and 2 = baseline; day 3 = SD and recovery 1; day 4 =recovery 2
