# Supplementary material for: The sleep-wake distribution contributes to the peripheral rhythms in PERIOD-2
Source: eLife. 2021 Dec 13;10:e69773. doi: 10.7554/eLife.69773 (PMC8798053; doi:10.7554/eLife.69773)
Supplement: Figure 1—figure supplement 4—source data 1. [file elife-69773-fig1-figsupp4-data1.xlsx]

## Sheet: peripheral_3MS113
Time [hrs]	Waking [min/3min]	Bioluminescence	Wake bouts (='1') and sleep bouts (='0')
12.05	0.33333	373.94
12.1	1.1333	360.27	0
12.15	1	380.63	0
12.2	0.53333	373.28	0
12.25	0.8	364.26	0
12.3	0.46667	364.1	0
12.35	0.8	363.31	0
12.4	0.73333	367.66	1
12.45	1.8	361.78	1
12.5	2.9333	308.89	1
12.55	3	373.23	1
12.6	3	511.45	1
12.65	3	565.56	1
12.7	3	579.3	1
12.75	3	592.77	1
12.8	3	543.39	1
12.85	1.6667	522.73	1
12.9	1.1333	692.78
12.95	0.8	768.89
13	0.6	801.47
13.05	2.0667	714.69
13.1	0.8	702.47
13.15	0.6	663.99
13.2	0.73333	645.52
13.25	1.0667	531.1
13.3	1.2	524.73
13.35	3	397.24
13.4	2.8667	468.82
13.45	2.8667	516.38
13.5	3	728.34
13.55	3	744.96
13.6	3	679.14
13.65	3	717.08
13.7	3	701.61
13.75	2.4667	607.75
13.8	0.066667	613.5
13.85	0.46667	607.11
13.9	0.46667	603.06
13.95	0.6	573.04
14	3	534.29
14.05	3	469.16
14.1	3	651.34
14.15	3	597.25
14.2	2.8667	565.46
14.25	3	507.08
14.3	3	474.19
14.35	3	480.2
14.4	3	466.31
14.45	3	569.93
14.5	3	590.51
14.55	3	571.05
14.6	3	704.34
14.65	3	666.48
14.7	1.8667	631.79
14.75	3	502.86
14.8	2.1333	589.71
14.85	0.33333	628.29
14.9	0.26667	591.93
14.95	3	551.89
15	3	527.8
15.05	1.6	472.98
15.1	0.13333	440.83
15.15	0.33333	420.92
15.2	0.66667	421.72
15.25	1.9333	459.84
15.3	2.6667	471.37
15.35	2.2667	398.97
15.4	0.2	379.18	0
15.45	0.4	385.78	0
15.5	0.6	381.07	0
15.55	0.8	408.29	0
15.6	0.13333	405.05	0
15.65	1.4	430.79	0
15.7	0.26667	447.83	0
15.75	0.8	456.46	0
15.8	0.53333	421.44	0
15.85	0.93333	376.44	1
15.9	3	407.24	1
15.95	3	399.18	1
16	3	393.65	1
16.05	3	360.83	1
16.1	3	328.52	1
16.15	3	429.48	1
16.2	1.2667	394.12
16.25	0.6	376.24
16.3	0.66667	375.57
16.35	0.4	462
16.4	0.66667	491.15
16.45	0.86667	501.96
16.5	0.26667	485.91
16.55	1.9333	475.96
16.6	0.4	464.34
16.65	0.6	436.21
16.7	0.066667	448.81
16.75	0.86667	435.53
16.8	1.3333	419.91
16.85	0.2	380.66
16.9	0.66667	376.53
16.95	0.8	390.34
17	0.8	430.38
17.05	2.1333	377.94
17.1	3	349.41
17.15	3	412.97
17.2	1.3333	534.15
17.25	0.66667	611.15
17.3	2.3333	625.48
17.35	3	551.84
17.4	3	536.16
17.45	3	489.34
17.5	1.3333	597.76
17.55	1.4667	705.74
17.6	3	766.81
17.65	3	766.92
17.7	3	716.57
17.75	3	649.17
17.8	2.3333	702.73
17.85	0.6	876.35
17.9	0.6	903.62
17.95	0.66667	912.85
18	0.6	838.85
18.05	1.3333	705.01
18.1	0.53333	767.65
18.15	2.7333	704.9	1
18.2	3	669.92	1
18.25	3	603.97	1
18.3	3	576	1
18.35	3	523.75	1
18.4	3	485.33	1
18.45	3	549.94	1
18.5	3	814.49	0
18.55	0.73333	916.23	0
18.6	0.26667	819.94	0
18.65	0.13333	886.28	0
18.7	0.73333	798.59	0
18.75	0.26667	758.08	0
18.8	1.4	708.13	0
18.85	0.73333	628.15	0
18.9	0.66667	564.71	0
18.95	1	513.14	0
19	0.6	575.89	0
19.05	0.4	573.43	0
19.1	0.73333	594.7	0
19.15	3	486.35
19.2	2.8	564.15
19.25	0.66667	566.97
19.3	1.3333	644.04
19.35	2	614.53
19.4	3	463.69
19.45	3	586.11
19.5	3	795.87
19.55	3	719.07
19.6	3	811.39
19.65	3	846.63
19.7	1.0667	858.53
19.75	0.46667	773.73
19.8	0.4	792.8
19.85	2.2	877.67
19.9	3	816.07
19.95	3	718.16
20	3	595.21
20.05	0.86667	633.96	0
20.1	0.66667	703.5	0
20.15	1.3333	755.28	0
20.2	0.53333	809.79	0
20.25	0.53333	825.04	0
20.3	1.3333	700.17	0
20.35	1.3333	668.42	0
20.4	0.53333	734.56	0
20.45	1.2	693.63	1
20.5	2.6667	609.03	1
20.55	3	545.16	1
20.6	3	517.43	1
20.65	3	490.5	1
20.7	3	522.01	1
20.75	3	434.17	1
20.8	2.2667	632.77	1
20.85	0.66667	850.49
20.9	3	709.65
20.95	0.66667	649.63
21	0.6	607.76
21.05	0.66667	597.65
21.1	0.33333	767.54
21.15	0.66667	741.32
21.2	0.73333	719.26
21.25	1.6667	625.04
21.3	1	529.53
21.35	0.53333	598.31
21.4	0.86667	571.93
21.45	2.1333	557.38	1
21.5	3	439.78	1
21.55	3	459.25	1
21.6	2.9333	521.23	1
21.65	2.7333	622.84	1
21.7	3	609.26	1
21.75	3	642.11	1
21.8	3	632.38	1
21.85	3	646.78	1
21.9	3	655.78	1
21.95	3	584.92	0
22	0.93333	589.12	0
22.05	1.4667	747.16	0
22.1	0.8	779.52	0
22.15	0.2	688.1	0
22.2	1.2	536.99	0
22.25	0.6	521.4	0
22.3	0.66667	593.93	0
22.35	1.7333	534.8
22.4	0.8	466.8
22.45	0.66667	470.72
22.5	0.93333	470.03
22.55	1.4	440.79
22.6	3	364.68
22.65	3	456.26
22.7	3	472.13
22.75	3	519.37
22.8	3	604.71
22.85	3	578.2
22.9	3	562.38
22.95	3	575.03
23	3	680.5
23.05	3	598.61
23.1	3	607.81
23.15	0.8	640.72
23.2	0.86667	615.53
23.25	0.46667	568.37
23.3	0.6	513.31
23.35	1.9333	551.11
23.4	0.46667	493.16
23.45	0	471.2
23.5	1.2667	444.65
23.55	0.066667	470.83
23.6	0.066667	460.99
23.65	0	447.7
23.7	0.8	381.17
23.75	0.066667	374.08
23.8	0.2	370.75
23.85	0.13333	358.13
23.9	1.5333	389
23.95	0.46667	398.94	0
24	0.33333	367.12	0
24.05	0.4	376.39	0
24.1	0.66667	391.77	0
24.15	0.26667	370.95	0
24.2	0.86667	344.37	0
24.25	0.53333	328.93	0
24.3	0.4	306.84	1
24.35	2.4	321.96	1
24.4	3	295.34	1
24.45	3	311.87	1
24.5	3	325.83	1
24.55	2.6667	548.92	1
24.6	3	820.32	1
24.65	3	763.5	1
24.7	2.9333	840.97	1
24.75	3	865.93	1
24.8	2.8667	740.49	1
24.85	2.8667	622.76	1
24.9	3	658.87	1
24.95	3	581.92	1
25	3	507.52	1
25.05	3	430.14	1
25.1	2.8667	490.1	0
25.15	0.86667	466.61	0
25.2	0.86667	429.91	0
25.25	0.86667	400.86	0
25.3	0.53333	419.8	0
25.35	0.46667	405.93	0
25.4	0.86667	386.94	0
25.45	1	381.49	0
25.5	1.2	323.99	0
25.55	1.2667	296.39	0
25.6	0.73333	320.3	0
25.65	0.2	328.21	0
25.7	1.2667	309.99	0
25.75	0.4	327.33	0
25.8	1.4	309.47	0
25.85	0.26667	311.33	0
25.9	0.4	302.09	0
25.95	0.4	283.83	0
26	1.0667	267.03	0
26.05	2.0667	261.59
26.1	0.53333	303.81
26.15	1.0667	287.02
26.2	0.6	278.88
26.25	0.93333	271.62
26.3	0.4	253.27
26.35	1.7333	283.4
26.4	0.26667	291.2	0
26.45	0.066667	278.03	0
26.5	0.26667	283.43	0
26.55	0.6	263.99	0
26.6	0.73333	266.37	0
26.65	0.13333	276.17	0
26.7	0.66667	259.51	1
26.75	2.8667	241.02	1
26.8	3	245.84	1
26.85	3	232.29	1
26.9	3	240.27	1
26.95	3	235.78	1
27	3	260.72	1
27.05	3	355.68	1
27.1	2.8667	386.04	1
27.15	2.0667	433.86	1
27.2	0.66667	477.48	0
27.25	0.53333	456.38	0
27.3	0.066667	410.24	0
27.35	0.86667	393.38	0
27.4	0.46667	363.96	0
27.45	0.33333	343.01	0
27.5	0.53333	333.36	0
27.55	0.26667	311.66	0
27.6	0.6	304.28	0
27.65	0.26667	313.64	0
27.7	1.3333	284.93	0
27.75	1.4667	276.62	0
27.8	2.4	247.04
27.85	0.066667	278.42
27.9	1.1333	270.98
27.95	0.26667	260.25
28	0.46667	252.39
28.05	0.93333	260.5
28.1	0.6	252.97
28.15	0.8	251.9
28.2	1.2	240.15
28.25	1	242.89
28.3	0.66667	249.27
28.35	1.8	253.54
28.4	0.33333	262.78
28.45	0.13333	251.99
28.5	0.86667	248.37
28.55	1.2667	243.75
28.6	0.4	251.68
28.65	0.13333	248.48
28.7	1.2	247.62
28.75	0.46667	253.64
28.8	1.0667	251.6
28.85	0.73333	256.23
28.9	0.93333	255.23
28.95	3	226.01
29	3	238.57
29.05	3	219.61
29.1	3	258.28
29.15	3	279.28
29.2	1.4667	375.46
29.25	1	396.2
29.3	1.0667	372.96
29.35	0.6	364.14
29.4	1.0667	338.34
29.45	0.33333	329.83
29.5	0.33333	321.85
29.55	0.4	300.95
29.6	2.2667	292.77
29.65	1	294.33
29.7	0.8	269.04
29.75	0.93333	261.87
29.8	0.86667	251.67
29.85	0	278.47
29.9	1.6	277.23
29.95	0.4	262.81	0
30	0.13333	263.43	0
30.05	0.66667	249.01	0
30.1	0.33333	250.08	0
30.15	0.73333	238.39	0
30.2	0.26667	236.11	0
30.25	0.73333	239.4	0
30.3	0.53333	236.69	0
30.35	1.4	225.25	0
30.4	0.66667	230.72	0
30.45	0.33333	232.3	1
30.5	2.8667	224.32	1
30.55	3	206.79	1
30.6	3	181.86	1
30.65	3	254.15	1
30.7	3	355.06	1
30.75	2.6667	380.02	1
30.8	3	369.25	1
30.85	3	349.76	1
30.9	3	344.45	1
30.95	3	298.54	1
31	3	303.99	1
31.05	3	304.77	1
31.1	0.53333	342.77	0
31.15	0.46667	313.86	0
31.2	0.26667	287.02	0
31.25	0.86667	277.51	0
31.3	0.66667	272.49	0
31.35	0.6	265.63	0
31.4	0.33333	253.36	0
31.45	0.26667	257.16	0
31.5	1.6667	242.97
31.55	0.66667	233.19
31.6	0.33333	228.99
31.65	0.6	235.04
31.7	0	237.69
31.75	0.53333	229.87
31.8	1.0667	222.71
31.85	0.26667	220.27
31.9	0.93333	223.45
31.95	0.73333	226.34
32	0.6	225.74
32.05	0.53333	227.28
32.1	0.93333	238.28
32.15	0.66667	235.62
32.2	1	212.89
32.25	0.46667	225.93
32.3	0.8	231.74
32.35	1.0667	270.74
32.4	0.66667	274.92
32.45	0.66667	267.99
32.5	1.2	273.26
32.55	0.53333	249.77
32.6	1.0667	258.99
32.65	0.46667	269.02
32.7	0.46667	251.2
32.75	0.6	228.69
32.8	0.53333	232.49
32.85	0.4	228.63
32.9	1.2	217.41
32.95	0.73333	222.1
33	0.93333	222.48
33.05	0.73333	217.84
33.1	0.86667	210.22
33.15	2.2	201.29
33.2	3	182.49
33.25	3	177.6
33.3	3	190.27
33.35	2.2	284.94
33.4	0.26667	294.81
33.45	1.9333	372.21
33.5	3	384.03
33.55	0.6	390.53
33.6	2.2	376.19
33.65	1.3333	343.8
33.7	3	292.89	1
33.75	3	266.53	1
33.8	3	245.76	1
33.85	2.8667	420.89	1
33.9	3	526.79	1
33.95	2.7333	498.85	1
34	2.9333	577.15	1
34.05	3	484.1	1
34.1	3	401.53	1
34.15	3	386.82	1
34.2	3	348.29	1
34.25	3	313.53	1
34.3	3	306.4	1
34.35	3	304.92	1
34.4	3	353.96	1
34.45	3	304.92	1
34.5	3	339.79	1
34.55	2.3333	341.75	0
34.6	1.2667	322.91	0
34.65	0.73333	285.13	0
34.7	0.33333	328.91	0
34.75	0.066667	290.25	0
34.8	0.53333	287.27	0
34.85	0.46667	300.83	0
34.9	0.13333	287.74	0
34.95	0.2	275.21	0
35	0.8	247.08	0
35.05	0.93333	227.57	0
35.1	0.6	222.95	0
35.15	0.4	229.24	0
35.2	1	245.58	0
35.25	0.4	252.36	0
35.3	0.8	245.69	1
35.35	3	252.87	1
35.4	3	235.19	1
35.45	3	223.3	1
35.5	3	229.79	1
35.55	3	237.99	1
35.6	3	254.04	1
35.65	3	324.51	1
35.7	3	309.78	1
35.75	3	290.11	1
35.8		328.25
35.85	0.66667	337.43
35.9	0.66667	310.88
35.95	1	294.52
36	0.8	346.37
36.05	0.46667	345.9
36.1	1.4	318.73
36.15	0.73333	316.49
36.2	0.8	309
36.25	0.86667	288.98
36.3	0.8	296.63
36.35	1	288.63
36.4	0.66667	289.39
36.45	3	271.21
36.5	3	277.88
36.55	3	259.28
36.6	1.0667	266.6
36.65	0.33333	283.44
36.7	0.73333	289.91
36.75	2.4	275.71	1
36.8	3	256.25	1
36.85	3	271.56	1
36.9	3	474.36	1
36.95	3	555.77	1
37	3	523.41	1
37.05	3	514.06	1
37.1	3	445.33	1
37.15	3	397.86	1
37.2	2	545.42	0
37.25	0.46667	586.31	0
37.3	0.46667	555.74	0
37.35	0.93333	580.83	0
37.4	0.8	519.99	0
37.45	0.13333	500.14	0
37.5	0.2	466.66	0
37.55	1.7333	420.66
37.6	0.93333	383.51
37.65	0.4	367.84
37.7	0.66667	359.93
37.75	0.53333	386.94
37.8	2.8667	360.98
37.85	2.6	302.9
37.9	2.4	322.08
37.95	3	356.79
38	3	358.44
38.05	3	337.66
38.1	1.6667	400.75
38.15	0.4	454.31
38.2	1.9333	468.31	1
38.25	3	402.16	1
38.3	3	419.43	1
38.35	3	451.94	1
38.4	3	423.32	1
38.45	3	402.92	1
38.5	3	409.81	1
38.55	3	302.48	0
38.6	0.73333	534.84	0
38.65	0.4	534.47	0
38.7	0.66667	569.8	0
38.75	0.6	567.87	0
38.8	0.46667	564.92	0
38.85	1.2	479.99	0
38.9	0.2	453.19	0
38.95	1.3333	434.77	0
39	3	364.13
39.05	2.7333	387.95
39.1	0.26667	401.57
39.15	0.53333	369.31
39.2	2.9333	395.6	1
39.25	3	345.51	1
39.3	3	429.56	1
39.35	3	579.65	1
39.4	3	625.65	1
39.45	3	602.26	1
39.5	3	599.13	1
39.55	3	553.44	0
39.6	0.26667	582.71	0
39.65	0.86667	578.13	0
39.7	0.66667	612.33	0
39.75	0.8	597.91	0
39.8	0.86667	509.56	0
39.85	0.33333	475.92	0
39.9	1.9333	472.03
39.95	3	439.46
40	3	439.21
40.05	3	401.88
40.1	1.5333	500.73
40.15	0.53333	500.33
40.2	0.6	494.71
40.25	1	480.54
40.3	0.6	467.03
40.35	0.86667	452.94
40.4	2.3333	431.97	1
40.45	3	373.64	1
40.5	3	392.15	1
40.55	3	373.86	1
40.6	3	444.15	1
40.65	3	432.02	1
40.7	3	453.62	1
40.75	3	478.16	1
40.8	2.8667	503.65	1
40.85	3	529.41	1
40.9	3	513.88	1
40.95	3	493.17	1
41	3	458.9	1
41.05	3	486.6	0
41.1	0.66667	607.11	0
41.15	0.26667	593.53	0
41.2	0.33333	561.85	0
41.25	0.26667	526.92	0
41.3	0.93333	551.5	0
41.35	0.13333	537.9	0
41.4	1.0667	481.12	0
41.45	0.8	430.81	0
41.5	0.53333	423.93	0
41.55	1.2	418.71	0
41.6	0.2	401.62	0
41.65	1.5333	393.47
41.7	0.4	450.96
41.75	0.86667	450.14
41.8	0.4	466.36
41.85	0.8	454.16
41.9	1.8667	395.06
41.95	3	360.04
42	3	351.19
42.05	1.4667	369.24
42.1	0.4	387.66
42.15	1.9333	442.22	1
42.2	3	462.22	1
42.25	3	434.72	1
42.3	3	488.1	1
42.35	3	509.97	1
42.4	3	444.63	1
42.45	3	382.53	1
42.5	3	417.17	1
42.55	3	517.6	1
42.6	3	567.78	1
42.65	3	679.07	1
42.7	3	637.16	0
42.75	1.2	678.43	0
42.8	0.2	623.23	0
42.85	0.86667	563.34	0
42.9	0.46667	523.19	0
42.95	1.0667	545.79	0
43	0.6	520.15	0
43.05	0.6	500.71	0
43.1	0.13333	484.62	0
43.15	0.4	459.49	0
43.2	0.8	436.11	0
43.25	0.93333	432.58	0
43.3	0.6	444.34	0
43.35	0.66667	440.63	0
43.4	0.53333	422.26	0
43.45	1.1333	413.77	0
43.5	0.8	363.82	0
43.55	0.4	373.62	0
43.6	0.4	365.2	0
43.65	0.66667	353.73	0
43.7	2.9333	351.78
43.75	0.66667	355.83
43.8	1.2	349.14
43.85	1.6667	382.9	1
43.9	2.4667	346.01	1
43.95	2.6667	289.48	1
44	3	325.22	1
44.05	3	381.57	1
44.1	3	432.6	1
44.15	3	472.49	1
44.2	3	546.67	1
44.25	3	615.25	1
44.3	2.0667	577.85	0
44.35	0.66667	599.03	0
44.4	0.66667	622.72	0
44.45	0.73333	638.86	0
44.5	1.0667	578.91	0
44.55	0.066667	509.84	0
44.6	1.2	464.53	0
44.65	0.33333	547.98	0
44.7	0.2	515.32	0
44.75	1.1333	534.85	0
44.8	1.1333	503.16	0
44.85	0.26667	495.5	0
44.9	0.86667	508.99	0
44.95	0.86667	481.17	1
45	1.8667	419.53	1
45.05	3	413.55	1
45.1	3	346.47	1
45.15	3	356.65	1
45.2	3	486.8	1
45.25	3	440.16	1
45.3	3	474.88	1
45.35	3	490.59	1
45.4	3	492.9	1
45.45	3	491.19	1
45.5	3	608.75	1
45.55	3	605.75	1
45.6	3	609.89	1
45.65	3	610.45	1
45.7	3	675.98	1
45.75	3	671.96	1
45.8	3	537.12	1
45.85	3	551.61	1
45.9	3	690.08	1
45.95	1.9333	628.13	1
46	0.53333	597.57	0
46.05	0.46667	492.55	0
46.1	0.6	465.98	0
46.15	0.2	458.78	0
46.2	1.4667	429.89	0
46.25	0.26667	447.67	0
46.3	1.5333	480.01
46.35	0	479.83
46.4	0.066667	435.59
46.45	1.2667	464.22
46.5	0.13333	474.08
46.55	0.2	461.22
46.6	0	449.07
46.65	1.4667	429.67
46.7	2.8667	362.56
46.75	2.6667	330.96
46.8	1.4	399.05
46.85	0.53333	419.23
46.9	0.66667	421.35
46.95	0.73333	416.24
47	1.2	366.82
47.05	2.9333	294.27
47.1	0.4	333.33
47.15		308.2
47.2	0.73333	328.12
47.25	1.7333	313.39
47.3	3	316.41
47.35	3	358.19
47.4	3	366.64
47.45	3	443.59
47.5	3	525.51
47.55	3	558.89
47.6	3	544.67
47.65	3	491.16
47.7	3	596.05
47.75	3	546.76
47.8	3	530.7
47.85	3	597.28
47.9	3	680.41
47.95	3	583.66
48	1.6667	586.33
48.05	0.2	607.75
48.1	0.4	750.65
48.15	1.9333	531.43
48.2	0.2	512.03	0
48.25	0.13333	477.7	0
48.3	1	416.23	0
48.35	0.13333	385.1	0
48.4	0.4	358.77	0
48.45	0.4	333.68	0
48.5	0.6	306.51	0
48.55	1	290.84	0
48.6	0.13333	348.13	0
48.65	0.86667	322.45	0
48.7	0.26667	339.96	0
48.75	0.4	322.5	0
48.8	0.13333	310.97	0
48.85	1.2	292.55	1
48.9	3	313.68	1
48.95	3	308.97	1
49	3	317.33	1
49.05	3	349.51	1
49.1	3	388.36	1
49.15	3	379.27	1
49.2	3	444.32	1
49.25	3	436.65	1
49.3	3	424.99	1
49.35	3	424.68	1
49.4	1.6667	457.33	1
49.45	0.86667	526.77	0
49.5	1.0667	522.62	0
49.55	0.066667	439.84	0
49.6	0.93333	409.25	0
49.65	0.13333	403.05	0
49.7	0.93333	354.81	0
49.75	0.066667	338.08	0
49.8	1.1333	324.17	0
49.85	0.2	316.81	0
49.9	0	305.73	0
49.95	0.2	294.66	0
50	0.2	293.11	0
50.05	1.6667	276.33
50.1	0.2	292.14
50.15	0.33333	269.05
50.2	1.1333	288.76
50.25	0.26667	280.54
50.3	0.73333	260.72
50.35	0.53333	258.79
50.4	2	256.97
50.45	3	229.15
50.5	3	246.11
50.55	3	279.6
50.6	3	300.89
50.65	3	309.76
50.7	3	305.27
50.75	3	292.39
50.8	3	309.81
50.85	3	303.55
50.9	2.6667	390.46
50.95	0.66667	414.53
51	0.66667	377.33
51.05	0.6	360.4
51.1	3	295.56
51.15	3	308.8
51.2	2.4	352.67
51.25	0.26667	355.65
51.3	0.4	324.08
51.35	0.46667	308.1
51.4	0.8	285.68
51.45	0.13333	275.82
51.5	0.2	263.49
51.55	0.6	242.91
51.6	0.86667	243.11
51.65	0.26667	237.85
51.7	0.2	229.36
51.75	0.33333	223.63
51.8	1.6	230.32
51.85	3	225.57
51.9	2.5333	209.55
51.95	0.4	232.13
52	0.6	226.38
52.05	0.8	223.91
52.1	0.6	235.89
52.15	0.26667	233.29
52.2	0.4	235.25
52.25	3	226.54	1
52.3	3	228.86	1
52.35	3	231.26	1
52.4	3	229.46	1
52.45	3	252.84	1
52.5	3	261.33	1
52.55	3	312.16	1
52.6	3	335.43	1
52.65	2.7333	339.14	0
52.7	0.73333	305.21	0
52.75	0.53333	292.3	0
52.8	0.86667	265.12	0
52.85	0.53333	255.15	0
52.9	0.33333	261.46	0
52.95	0.33333	237.11	0
53	0.8	226.53	0
53.05	0.2	218.18	0
53.1	0.26667	211.09	0
53.15	0.53333	208.94	0
53.2	1.0667	208.65	0
53.25	0	203.32	0
53.3	0.26667	198.88	0
53.35	0.46667	201.06	0
53.4	1	195.46	0
53.45	0.4	185.4	0
53.5	0.73333	191.51	0
53.55	0.8	211.2	0
53.6	0.53333	234.83	0
53.65	0.6	235.14	0
53.7	1	238.45	0
53.75	3	229.61
53.8	3	268.55
53.85	3	311.21
53.9	1.6	366.19
53.95	0.2	358.26
54	0.93333	331.89
54.05	0.2	314.67
54.1	0.8	300.65
54.15	0.13333	285.92
54.2	0.066667	266.54
54.25	1.6	269.41
54.3	0.066667	271.55
54.35	0.2	254.82
54.4	1.2667	249.42
54.45	3	192.38
54.5	3	176.91
54.55	3	208.96
54.6	3	255.69
54.65	1.3333	271.54
54.7	0.66667	300.79
54.75	0.2	332.61
54.8	0.4	302.19
54.85	0.4	299.7
54.9	0.33333	292.24
54.95	0.2	275.04
55	0.33333	258.62
55.05	0.46667	247.74
55.1	0.2	251.45
55.15	0.33333	240.23
55.2	1.1333	237.12
55.25	0.2	241.68
55.3	0.26667	239.66
55.35	0.33333	229.28
55.4	0.66667	218.2
55.45	1.6	193.49
55.5	0.66667	186.4
55.55	0.86667	212.22
55.6	0.66667	217.2
55.65	0.86667	223.94
55.7	1	244.01
55.75	0.8	257.86
55.8	1.8667	266.95
55.85	3	212.57
55.9	3	204.08
55.95	3	261.09
56	3	267.47
56.05	2.9333	224.6
56.1	0.86667	327.14
56.15	0.6	330.25
56.2	0.33333	295.7
56.25	1.1333	289.08
56.3	0.4	315.19
56.35	0.46667	308.95
56.4	0.2	283.53
56.45	0.46667	268.33
56.5	0.33333	283.16
56.55	0.46667	293.05
56.6	0.6	305.56
56.65	2.0667	244.5
56.7	0.73333	267.3	0
56.75	0.66667	285.03	0
56.8	0.66667	285.06	0
56.85	0.6	288.19	0
56.9	0.73333	288.77	0
56.95	0.66667	300.87	0
57	1.1333	287.53	0
57.05	0.86667	275.6	0
57.1	1	271.92	0
57.15	1.2	259.25	1
57.2	3	218.3	1
57.25	3	228.21	1
57.3	3	218.26	1
57.35	3	216.48	1
57.4	3	325.71	1
57.45	1.8	455.8	1
57.5	0.86667	473.11
57.55	0.86667	422.34
57.6	0.93333	395.69
57.65	0.53333	389.72
57.7	1.4	347.19
57.75	3	333.95	1
57.8	3	291.3	1
57.85	3	262.26	1
57.9	3	300.64	1
57.95	3	313.69	1
58	3	302.18	1
58.05	3	264.23	1
58.1	3	270.09	1
58.15	3	294.52	1
58.2	1.7333	340.99	0
58.25	0.53333	335.1	0
58.3	0.86667	313.1	0
58.35	0.6	328.04	0
58.4	0.33333	332.33	0
58.45	0.2	299.2	0
58.5	1.2	280.76	0
58.55	0.4	275.58	0
58.6	0.4	262.03	0
58.65	0.73333	253.1	0
58.7	1.4	257.52	0
58.75	0.6	247.7	0
58.8	0.73333	247.46	1
58.85	3	217.66	1
58.9	3	200.55	1
58.95	3	298.22	1
59	3	301.6	1
59.05	3	309.38	1
59.1	3	450.81	1
59.15	3	444.01	1
59.2	3	415.19	1
59.25	3	403.97	1
59.3	3	358.59	1
59.35	3	345.2	1
59.4	1.4667	358.86	0
59.45	0.93333	359.09	0
59.5	0.53333	351.27	0
59.55	0.73333	307.83	0
59.6	0.2	308.27	0
59.65	0.73333	353.28	0
59.7	0.6	338.54	0
59.75	1.4	292.81	0
59.8	0.46667	306.7	1
59.85	2.8667	278.86	1
59.9	3	235.4	1
59.95	2.9333	285.44	1
60	3	282.62	1
60.05	3	337.98	1
60.1	3	359.94	1
60.15	3	344.7	1
60.2	3	346.57	1
60.25	3	348.57	1
60.3	3	375.88	1
60.35	3	352.71	1
60.4	3	364.29	1
60.45	1.9333	392.98	1
60.5	0.53333	417.49	0
60.55	0.53333	399.98	0
60.6	0.4	376.38	0
60.65	0.66667	360.32	0
60.7	0.33333	365.26	0
60.75	0.33333	333.39	0
60.8	0.73333	334.5	0
60.85	0.2	316.42	0
60.9	0.73333	307.13	0
60.95	0.73333	303.53	0
61	1.2	287.29	0
61.05	0.73333	282.52	1
61.1	1.7333	265.81	1
61.15	3	275.45	1
61.2	3	303.06	1
61.25	3	234.17	1
61.3	3	298.79	1
61.35	3	397.89	1
61.4	3	520.89	1
61.45	3	529.87	1
61.5	3	513.03	1
61.55	3	487.83	1
61.6	3	478.92	1
61.65	3	432.85	1
61.7	3	440.17	1
61.75	3	467.13	1
61.8	1.6	503.97	1
61.85	0.53333	473.62	0
61.9	0.73333	476.44	0
61.95	0.6	482.16	0
62	0.33333	488.96	0
62.05	0.8	454.63	0
62.1	0.73333	448.65	0
62.15	0.66667	413.92	0
62.2	0.8	387.5	1
62.25	2.4667	326.57	1
62.3	3	275.39	1
62.35	3	253.86	1
62.4	2.1333	350.69	1
62.45	3	337.65	1
62.5	3	331.38	1
62.55	3	431.72	1
62.6	3	437.27	1
62.65	3	384.43	1
62.7	3	375.08	1
62.75	3	390.08	1
62.8	3	384.28	1
62.85	3	469.33	1
62.9	3	511.67	1
62.95	3	567.78	1
63	3	510.38	1
63.05	3	491.05	1
63.1	3	440.36	1
63.15	3	451.34	1
63.2	2.6667	458.43	1
63.25	0.26667	445.86	0
63.3	0.4	458.06	0
63.35	0.8	416.95	0
63.4	0.86667	451.78	0
63.45	0.46667	476	0
63.5	0.066667	498.76	0
63.55	0.13333	479.98	0
63.6	0.8	435.83	0
63.65	1.1333	392.01	0
63.7	0.66667	387.17	0
63.75	0.66667	296.88	0
63.8	0.73333	297.57	0
63.85	0.53333	290.29	0
63.9	0.6	341.82	0
63.95	0.73333	370.87	0
64	0.66667	370.58	0
64.05	0.73333	396.78	0
64.1	0.73333	383.81	0
64.15	1	389.63	0
64.2	0.6	390.1	0
64.25	1	406.73	0
64.3	1	451.51	0
64.35	0.46667	446.15	0
64.4	0.6	452.89	0
64.45	1.2667	400.22	0
64.5	3	331.52
64.55	1.8667	398.05
64.6	0.73333	437.65
64.65	0.8	430.48
64.7	1.3333	431.59
64.75	3	351.99
64.8	2.4667	528
64.85	0.53333	454.98
64.9	0.73333	453.04
64.95	0.2	447.58
65	0.8	439.16
65.05	0.73333	454.94
65.1	1.9333	529.28	1
65.15	3	484.61	1
65.2	3	440.88	1
65.25	3	329.55	1
65.3	3	529.35	1
65.35	3	664.06	1
65.4	3	677.6	1
65.45	3	612.49	1
65.5	3	610.83	1
65.55	3	600.98	1
65.6	3	592.03	1
65.65	3	584.68	1
65.7	3	574.61	1
65.75	3	544.04	1
65.8	1.8667	566.29	0
65.85	0.86667	564.55	0
65.9	0.53333	559.87	0
65.95	0.8	513.85	0
66	0.73333	505.65	0
66.05	0.93333	558.01	0
66.1	0.66667	452.61	0
66.15	0.66667	516.7	1
66.2	2.1333	516.53	1
66.25	3	494.33	1
66.3	3	499.4	1
66.35	3	472.78	1
66.4	3	456.05	1
66.45	3	386.63	1
66.5	2.9333	478.81	1
66.55	1.1333	568.94	0
66.6	1	561.77	0
66.65	0.33333	566.3	0
66.7	1.1333	545.06	0
66.75	0.93333	446.68	0
66.8	0.53333	400.37	0
66.85	0.53333	390.67	0
66.9	1.2667	530.16	0
66.95	0.66667	542.05	0
67	1.1333	408.09	0
67.05	0.66667	411.1	0
67.1	0.53333	426.3	0
67.15	1.8667	401.59
67.2	3	365.39
67.25	3	404.44
67.3	3	596.66
67.35	1.7333	670.91
67.4	0.6	773.45
67.45	0.6	719.83
67.5	1.2667	674.32
67.55	2.8667	423.81	1
67.6	3	504.23	1
67.65	3	668.9	1
67.7	3	611.64	1
67.75	3	577.42	1
67.8	3	608.82	1
67.85	3	619.18	1
67.9	2.4667	608.51	0
67.95	0.86667	729.63	0
68	1.0667	800.25	0
68.05	1.2	749.39	0
68.1	0.86667	794.03	0
68.15	0.86667	737.61	0
68.2	0.73333	733.5	0
68.25	2.8	647.35
68.3	3	589.62
68.35	3	489.53
68.4	3	427.67
68.45	3	522.54
68.5	3	512.61
68.55	3	551.56
68.6	3	527.26
68.65	3	501.84
68.7	3	612.59
68.75	3	561.26
68.8	3	582.38
68.85	3	587.71
68.9	3	529.69
68.95	3	588.63
69	3	508.01
69.05	3	514.63
69.1	3	470.43
69.15	1.2667	652.28
69.2	0.4	722.93
69.25	0.26667	703.73
69.3	1.5333	608.24
69.35	2.5333	521.78
69.4	0.2	470.54	0
69.45	0.4	430.34	0
69.5	0.46667	380.43	0
69.55	0.86667	388.19	0
69.6	0.93333	403.14	0
69.65	1.2667	438.57	0
69.7	0.66667	384.66	0
69.75	0.6	395.31	0
69.8	0.66667	376.09	0
69.85	0.73333	367.27	0
69.9	0.53333	364.96	0
69.95	0.66667	342.2	0
70	0.66667	350.83	0
70.05	0.86667	394.25	0
70.1	0.8	403.9	1
70.15	1.6	412.7	1
70.2	3	377.04	1
70.25	3	431.8	1
70.3	3	430.24	1
70.35	3	495.27	1
70.4	3	452.8	1
70.45	3	409.41	1
70.5	3	492.96	1
70.55	3	492.52	1
70.6	3	516.77	1
70.65	3	503.57	1
70.7	3	550.42	1
70.75	3	538.91	1
70.8	3	453.58	1
70.85	3	475.67	1
70.9	3	450.78	1
70.95	2.2667	565.81	1
71	0.6	651.34	0
71.05	0.8	562.65	0
71.1	0.26667	528.63	0
71.15	0.8	475.84	0
71.2	0.13333	488.51	0
71.25	0.33333	479.49	0
71.3	0.26667	463.58	0
71.35	0.4	442.27	0
71.4	0.53333	427.38	0
71.45	0.8	408.38	0
71.5	0.66667	370.5	0
71.55	0.66667	368.03	0
71.6	0.4	372.41	0
71.65	0.93333	345.26	0
71.7	0.4	339.73	0
71.75	0.93333	347.37	0
71.8	0.73333	354.6	0
71.85	0.66667	361.65	0
71.9	0.2	376.56	0
71.95	0.46667	373.43	0
72	0.66667		0
72.05	0.4		0
72.1	1.0667		0
72.15	2.0667
72.2	3
72.25	3
72.3	3
72.35	3
72.4	3
72.45	3
72.5	3
72.55	3
72.6	3
72.65	3
72.7	3
72.75	3
72.8	3
72.85	3
72.9	3
72.95	3
73	3
73.05	3
73.1	3
73.15	3
73.2	3
73.25	3
73.3	3
73.35	3
73.4	3
73.45	3
73.5	3
73.55	3
73.6	3
73.65	3
73.7	3
73.75	3
73.8	3
73.85	3
73.9	3
73.95	3
74	3
74.05	3
74.1	3
74.15	3
74.2	3
74.25	3
74.3	3
74.35	3
74.4	2.8
74.45	3
74.5	3
74.55	3
74.6	3
74.65	3
74.7	3
74.75	3
74.8	3
74.85	3
74.9	3
74.95	3
75	3
75.05	3
75.1	3
75.15	3
75.2	3
75.25	3
75.3	3
75.35	2.8667
75.4	2.9333
75.45	3
75.5	3
75.55	3
75.6	3
75.65	3
75.7	3
75.75	3
75.8	3
75.85	3
75.9	2.0667
75.95	2.4
76	3
76.05	3
76.1	3
76.15	3
76.2	2.8667
76.25	3
76.3	3
76.35	3
76.4	3
76.45	3
76.5	3
76.55	2.8
76.6	3
76.65	2.6
76.7	2.9333
76.75	3
76.8	2.7333
76.85	2.8667
76.9	2.8
76.95	2.4667
77	2.5333
77.05	2.8
77.1	3
77.15	3
77.2	3
77.25	3
77.3	3
77.35	3
77.4	3
77.45	3
77.5	3
77.55	3
77.6	3
77.65	3
77.7	3
77.75	3
77.8	3
77.85	2.4
77.9	3
77.95	2.7333
78	2.9333
78.05	3
78.1	3
78.15	3
78.2	2.6667	0.53722
78.25	3	0.54849
78.3	1.8	0.55621
78.35	0.4	0.65742
78.4	0.13333	0.61159
78.45	0.53333	0.59178
78.5	0.4	0.62229
78.55	0.33333	0.59278
78.6	0.4	0.55978
78.65	0.13333	0.55186
78.7	0.4	0.54832
78.75	0.26667	0.57205
78.8	0.13333	0.56492
78.85	0.86667	0.54391
78.9	0.93333	0.48526
78.95	0.2	0.51915
79	0.6	0.49564
79.05	0.46667	0.54862
79.1	0.46667	0.5224
79.15	0.46667	0.52267
79.2	1.3333	0.50719
79.25	0.26667	0.54046
79.3	0.6	0.56048
79.35	0.46667	0.59959
79.4	0.26667	0.58125
79.45	3	0.58678
79.5	2.8	0.55482
79.55	2.9333	0.58773
79.6	1.4667	0.54399
79.65	0.4	0.62903
79.7	0.53333	0.62758
79.75	0.46667	0.77321
79.8	0.13333	0.77869
79.85	0.13333	0.77207
79.9	0.33333	0.76087
79.95	1.1333	0.75769
80	0.46667	0.70843
80.05	0.4	0.70317
80.1	0.2	0.76756
80.15	0.33333	0.81935
80.2	0.93333	0.9047
80.25	0.4	0.93829
80.3	0.46667	0.85018
80.35	0.8	0.83198
80.4	0.26667	0.80665
80.45	0.33333	0.77709
80.5	0.6	0.72694
80.55	0.26667	0.65947
80.6	0.46667	0.65119
80.65	0.46667	0.71011
80.7	0.2	0.70699
80.75	0.86667	0.67707
80.8	0.33333	0.62279
80.85	0.53333	0.65653
80.9	0.46667	0.69742
80.95	0.4	0.725
81	0.66667	0.66734
81.05	0.2	0.6115
81.1	0.13333	0.62486
81.15	0.53333	0.72967
81.2	1.2667	0.85601
81.25	0.26667	0.89329
81.3	0.6	0.81112
81.35	0.4	0.80472
81.4	0.46667	0.89863
81.45	1.7333	0.9077
81.5	3	0.88023
81.55	3	0.79577
81.6	3	0.86085
81.65	3	0.70349
81.7	3	0.94809
81.75	3	0.87567
81.8	3	1.2069
81.85	1.5333	1.315
81.9	0.4	1.0842
81.95	1.2	1.0526
82	0.73333	1.0866
82.05	0.13333	0.99354
82.1	0.73333	0.9461
82.15	0.13333	0.93859
82.2	0.4	0.90194
82.25	0.66667	0.88083
82.3	0.66667	0.91509
82.35	0.066667	0.84773
82.4	1.2667	0.83642
82.45	0.2	0.88742
82.5	0.8	0.80505
82.55	0.53333	0.83107
82.6	0.26667	0.77763
82.65	0.4	0.81137
82.7	0.6	0.90043
82.75	0.33333	0.92619
82.8	1	0.94633
82.85	0.4	0.94435
82.9	1.7333	0.88205
82.95	3	0.85364
83	3	0.97106
83.05	0.8	1.2962
83.1	0.53333	1.2037
83.15	0.33333	1.2068
83.2	0.6	1.2797
83.25	0.13333	1.26
83.3	2.0667	1.1967
83.35	0.2	1.275
83.4	1.3333	1.3099
83.45	0.33333	1.4532
83.5	0.26667	1.3678
83.55	0.53333	1.3186
83.6	0.066667	1.2291
83.65	0.86667	1.3897
83.7	1	1.4454
83.75	3	1.1842
83.8	3	0.6327
83.85	3	0.98314
83.9	3	0.77672
83.95	3	0.83674
84	3	1.2305
84.05	3	2.0729
84.1	3	2.2566
84.15	3	1.7436
84.2	3	1.65
84.25	3	1.3727
84.3	3	1.3371
84.35	3	1.1313
84.4	0.73333	1.3542
84.45	0.2	1.2059
84.5	0.53333	1.1143
84.55	0.46667	1.0499
84.6	0.26667	0.96867
84.65	0.6	0.91122
84.7	0.26667	0.79323
84.75	0.4	0.71638
84.8	0.6	0.67635
84.85	0.53333	0.87553
84.9	0.73333	0.83726
84.95	0.66667	0.79842
85	3	0.75953
85.05	0.93333	0.92294
85.1	0.86667	0.87613
85.15	0.8	0.90017
85.2	0.6	0.9117
85.25	0.93333	0.91629
85.3	3	0.76259
85.35	3	0.95833
85.4	2.6667	1.214
85.45	0.53333	1.4014
85.5	0.73333	1.414
85.55	0.6	1.2449
85.6	1.2	1.1362
85.65	0.93333	1.1317
85.7	1.2667	0.9825
85.75	1.7333	0.9956
85.8	3	0.75961
85.85	2.6667	0.8638
85.9	1.7333	0.92846
85.95	1.0667	1.2236
86	1.2	1.2798
86.05	2.2667	1.3418
86.1	2.9333	1.0091
86.15	3	0.93307
86.2	3	1.5771
86.25	3	1.9333
86.3	3	1.5658
86.35	3	1.4475
86.4	3	1.4358
86.45	3	1.3853
86.5	3	1.1576
86.55	2	1.0408
86.6	0.33333	1.0487
86.65	0.73333	1.0964
86.7	1	1.2052
86.75	0.46667	1.2523
86.8	0.066667	1.1119
86.85	1.0667	1.155
86.9	0.66667	1.1404
86.95	0.26667	1.0571
87	0.73333	0.97826
87.05	0.46667	0.85449
87.1	0.33333	0.79396
87.15	1.1333	0.82123
87.2	0.6	0.91243
87.25	0.6	0.88918
87.3	2.8667	0.73438
87.35	3	0.73079
87.4	2.7333	0.68199
87.45	0.86667	1.2756
87.5	0.33333	1.2928
87.55	1.7333	1.3293
87.6	3	1.1001
87.65	3	1.1447
87.7	3	1.3061
87.75	1.6667	1.5051
87.8	0.93333	1.6641
87.85	1.1333	1.6535
87.9	2.0667	1.576
87.95	3	1.4546
88	3	1.4446
88.05	3	1.2254
88.1	3	1.3471
88.15	2.9333	0.94548
88.2	0.8	1.168
88.25	0.46667	1.6224
88.3	1.0667	1.5635
88.35	0.4	1.5707
88.4	0.8	1.0881
88.45	0.93333	1.0603
88.5	0.4	1.1762
88.55	0.93333	1.0261
88.6	1.1333	0.97374
88.65	0.73333	1.0107
88.7	0.93333	1.0544
88.75	3	0.76222
88.8	3	0.94279
88.85	1.4	1.9573
88.9	1.1333	2.1235
88.95	1.6667	1.8057
89	2.3333	1.426
89.05	3	1.0434
89.1	3	1.4027
89.15	3	1.6974
89.2	3	1.2604
89.25	3	1.1062
89.3	3	1.37
89.35	3	1.3148
89.4	3	1.431
89.45	0.8	1.7465
89.5	0.33333	1.7191
89.55	0.73333	1.5447
89.6	0.53333	1.3643
89.65	3	1.463
89.7	3	1.2798
89.75	1.9333	1.1823
89.8	0.4	1.0062
89.85	0.53333	0.93972
89.9	0.66667	1.232
89.95	0.93333	1.0786
90	3	1.2662
90.05	2.5333	1.032
90.1	0.46667	1.0571
90.15	0.8	0.98829
90.2	0.6	1.0222
90.25	0.2	0.97579
90.3	0.8	1.0225
90.35	0.93333	0.96469
90.4	0.46667	0.87533
90.45	0.86667	1.0567
90.5	0.8	1.055
90.55	1.7333	1.0978
90.6	3	1.1757
90.65	3	1.1843
90.7	3	1.1495
90.75	3	1.1214
90.8	3	1.1598
90.85	2.2	1.4684
90.9	0.4	1.7174
90.95	0.53333	1.6677
91	0.53333	1.5999
91.05	1.1333	1.5689
91.1	0.26667	1.365
91.15	1.1333	1.4172
91.2	0.2	1.3718
91.25	0.13333	1.256
91.3	0.46667	1.139
91.35	2.2	1.1876
91.4	3	1.015
91.45	1.6	1.2946
91.5	0.66667	1.1887
91.55	1.8	1.4911
91.6	3	1.5499
91.65	3	1.3039
91.7	3	1.03
91.75	3	1.3341
91.8	2.8	1.1946
91.85	0.6	1.3205
91.9	1.1333	1.3456
91.95	0.33333	1.2547
92	2	1.5927
92.05	1.0667	1.8475
92.1	0.6	1.7997
92.15	1.2667	1.6534
92.2	0.53333	1.6203
92.25	1.5333	1.3414
92.3	0.26667	1.2499
92.35	1.1333	1.1836
92.4	3	1.1336
92.45	3	1.1393
92.5	3	1.059
92.55	3	1.0576
92.6	3	1.0797
92.65	3	1.1145
92.7	3	1.4123
92.75	0.93333	1.7786
92.8	0.4	1.7652
92.85	0.86667	1.7883
92.9	0.26667	1.8903
92.95	0.46667	1.7479
93	0.13333	1.5792
93.05	0.26667	1.5231
93.1	2.3333	1.256
93.15	3	1.5029
93.2	3	1.2442
93.25	3	1.1645
93.3	3	1.2705
93.35	3	1.2299
93.4	3	1.2566
93.45	3	1.1549
93.5	3	1.1771
93.55	3	1.2114
93.6	2.6	1.0633
93.65	0.8	1.2523
93.7	2.9333	0.99716
93.75	2.8	1.2705
93.8	0.26667	1.497
93.85	0.86667	1.4859
93.9	0.53333	1.3617
93.95	0.66667	1.1062
94	2.1333	1.2299
94.05	0.8	1.1304
94.1	0.2	1.047
94.15	0.53333	0.99539
94.2	0.73333	0.90795
94.25	2.0667	0.97042
94.3	3	0.95385
94.35	3	0.93326
94.4	3	0.91131
94.45	3	0.91815
94.5	3	1.0218
94.55	3	0.86763
94.6	3	1.0525
94.65	3	0.93
94.7	1.9333	1.2211
94.75	1	1.2031
94.8	0.8	1.1282
94.85	0.6	1.1949
94.9	0.46667	1.1257
94.95	0.8	1.0538
95	0.4	0.99871
95.05	0.93333	0.96133
95.1	0.53333	0.90273
95.15	0.86667	0.87609
95.2	1.0667	0.90728
95.25	0.86667	1.0864
95.3	0.86667	1.1058
95.35	1.1333	1.0602
95.4	1.7333	1.0823
95.45	1.2667	1.2027
95.5	1.4	1.1899
95.55	0.86667	1.128
95.6	0.93333	1.1731
95.65	0.73333	1.0976
95.7	0.33333	1.1943
95.75	0.8	1.1651
95.8	0.6	1.048
95.85	0.66667	1.0604
95.9	0.4	1.0259
95.95	0.33333	0.92717
96	0.26667	0.84818
96.05	2	0.80371
96.1	3	0.76018
96.15	3	0.82432
96.2	3	1.0195
96.25	3	1.0621
96.3	3	1.1912
96.35	3	1.3724
96.4	3	1.3433
96.45	3	1.2884
96.5	3	1.1341
96.55	3	1.0638
96.6	3	1.1626
96.65	3	1.012
96.7	3	1.3132
96.75	3	1.2643
96.8	3	1.2602
96.85	3	1.2006
96.9	0.93333	1.5068
96.95	0.6	1.2315
97	1.0667	1.1488
97.05	0.86667	1.3915
97.1	0.4	1.2569
97.15	0.73333	1.131
97.2	0.53333	1.0845
97.25	0.4	1.0215
97.3	1.6	0.94796
97.35	0.66667	0.92544
97.4	1.2667	0.93014
97.45	3	0.89735
97.5	3	0.78014
97.55	3	0.70788
97.6	3	0.67097
97.65	3	0.90242
97.7	3	0.93762
97.75	3	0.82214
97.8	2.6667	0.85108
97.85	1.2667	0.91126
97.9	1.6667	1.0601
97.95	0.53333	1.0746
98	0.8	1.0096
98.05	1.0667	0.96472
98.1	0.86667	0.87207
98.15	0.93333	0.7666
98.2	0.66667	0.71181
98.25	0.4	0.6836
98.3	2.9333	0.69816
98.35	3	0.76553
98.4	3	0.73612
98.45	2.8667	0.72153
98.5	1.8	0.66335
98.55	1.2	0.73677
98.6	1.7333	0.73641
98.65	1.9333	0.77025
98.7	0.66667	0.9016
98.75	1	0.88825
98.8	1.7333	0.9246
98.85	3	0.79895
98.9	1.2	0.66063
98.95	0.86667	0.62471
99	0.8	0.69348
99.05	1.8	0.83448
99.1	0.93333	0.82437
99.15	0.73333	0.74043
99.2	0.8	0.72004
99.25	0.73333	0.69966
99.3	0.4	0.6492
99.35	0.46667	0.60754
99.4	0.86667	0.53518
99.45	1	0.53268
99.5	1.4	0.57205
99.55	0.33333	0.59906
99.6	1.2	0.63567
99.65	0.8	0.67702
99.7	0.8	0.72901
99.75	0.8	0.89107
99.8	1	0.88711
99.85	0.2	0.98499
99.9	0.8	0.97065
99.95	2.6667	0.78499
100	3	0.62664
100.05	2.4667	0.74683
100.1	0.86667	0.88741
100.15	0.46667	0.85941
100.2	0.6	0.83105
100.25	0.86667	0.9928
100.3	0.73333	0.98144
100.35	0.46667	0.99833
100.4	1.6	0.9047
100.45	0.86667	0.74854
100.5	1	0.66528
100.55	0.86667	0.61174
100.6	0.66667	0.63072
100.65	1.0667	0.61957
100.7	2.0667	0.58479
100.75	2.4	0.5921
100.8	3	0.48777
100.85	3	0.62631
100.9	3	0.61537
100.95	3	0.68399
101	3	0.73171
101.05	3	0.79569
101.1	3	0.8117
101.15	3	0.76911
101.2	3	0.787
101.25	3	0.79195
101.3	1	0.73335
101.35	0.93333	0.71063
101.4	0.53333	0.69921
101.45	0.33333	0.67075
101.5	0.26667	0.68222
101.55	0.2	0.61591
101.6	0	0.56737
101.65	2.4667	0.56628
101.7	0.8	0.62249
101.75	0.73333	0.64362
101.8	0.26667	0.58689
101.85	0.26667	0.56328
101.9	0.66667	0.59024
101.95	0.53333	0.58289
102	0.4	0.6269
102.05	0.86667	0.67477
102.1	0.93333	0.74913
102.15	0.66667	0.7129
102.2	0.33333	0.68355
102.25	1.7333	0.72782
102.3	1.1333	0.73017
102.35	1.5333	0.74718
102.4	1.5333	0.60166
102.45	0.13333	0.64343
102.5	0.73333	0.64985
102.55	0.86667	0.65955
102.6	1.2667	0.67718
102.65	0.86667	0.697
102.7	1.0667	0.67411
102.75	0.93333	0.57907
102.8	0.53333	0.57933
102.85	2.3333	0.53283
102.9	3	0.43048
102.95	3	0.4869
103	3	0.66851
103.05	3	0.74256
103.1	3	0.67645
103.15	3	0.5874
103.2	2.8	0.45356
103.25	3	0.58564
103.3	3	0.514
103.35	2.7333	1.0029
103.4	0.4	1.0495
103.45	0.2	0.97478
103.5	0.86667	0.93625
103.55	0.26667	0.82963
103.6	0.2	0.80659
103.65	0.2	0.76681
103.7	0.26667	0.64377
103.75	0.13333	0.6311
103.8	0.2	0.59607
103.85	1.1333	0.5101
103.9	1.0667	0.51146
103.95	1	0.57445
104	0.8	0.7436
104.05	1.1333	0.68948
104.1	0.73333	0.67155
104.15	0.33333	0.63386
104.2	1.4667	0.64585
104.25	2.1333	0.58329
104.3	2.9333	0.47093
104.35	1.9333	0.63868
104.4	0.73333	0.80073
104.45	0.66667	0.88494
104.5	0.4	0.89282
104.55	1.2	0.94507
104.6	0.73333	0.81149
104.65	0.26667	0.78173
104.7	0.73333	0.81359
104.75	0.53333	0.85046
104.8	0.86667	0.77809
104.85	0.4	0.73065
104.9	0.46667	0.70594
104.95	0.4	0.63373
105	0.33333	0.59187
105.05	0.73333	0.5863
105.1	0.8	0.56054
105.15	1.2667	0.5351
105.2	0.6	0.54517
105.25	2.8667	0.58866
105.3	3	0.7466
105.35	3	0.39815
105.4	3	0.59483
105.45	3	0.69964
105.5	1.4667	0.99126
105.55	0.66667	1.0065
105.6	1.1333	1.2255
105.65	0.53333	1.087
105.7	2.2667	1.0188
105.75	3	0.76359
105.8	3	0.6076
105.85	3	0.84359
105.9	3	0.76184
105.95	3	0.81847
106	3	0.80205
106.05	3	0.8483
106.1	3	0.81593
106.15	3	0.75331
106.2	3	0.6249
106.25	3	0.84702
106.3	3	0.62094
106.35	2.6	0.68654
106.4	0.86667	0.88536
106.45	0.73333	0.83708
106.5	0.46667	0.81607
106.55	1.2	0.7557
106.6	0.86667	0.88913
106.65	1.0667	0.84972
106.7	1.9333	0.87027
106.75	0.46667	0.91058
106.8	1.7333	0.72079
106.85	0.26667	0.56855
106.9	0.4	0.56287
106.95	1.0667	0.61064
107	0.4	0.68442
107.05	0.33333	0.68542
107.1	0.66667	0.62087
107.15	0.6	0.61259
107.2	0.86667	0.62797
107.25	3	0.5457
107.3	3	0.67163
107.35	3	0.44628
107.4	3	0.63941
107.45	1.0667	0.85471
107.5	0.6	0.83985
107.55	0.86667	0.88803
107.6	1	0.73141
107.65	3	0.95687
107.7	3	0.95761
107.75	3	0.76673
107.8	3	0.56776
107.85	3	0.67069
107.9	3	0.89912
107.95	3	0.95377
108	2.0667	0.97187
108.05	0.26667	1.4632
108.1	0.26667	1.3584
108.15	0.13333	1.2838
108.2	3	1.4131
108.25	3	1.1673
108.3	3	0.9865
108.35	3	0.55765
108.4	2.6	0.5745
108.45	0.46667	0.92119
108.5	0.73333	0.87056
108.55	0.53333	0.83178
108.6	3	0.98554
108.65	3	0.84951
108.7	3	0.58486
108.75	2.3333	0.60629
108.8	0.6	0.77747
108.85	2.4	0.84787
108.9	2.9333	0.71345
108.95	0.8	0.77864
109	0.4	0.83438
109.05	0.8	0.89283
109.1	0.53333	0.9126
109.15	0.66667	0.87658
109.2	1.0667	0.86162
109.25	0.8	1.0981
109.3	0.8	1.0538
109.35	1.0667	0.95559
109.4	2.7333	0.78061
109.45	0.8	0.9994
109.5	0.6	0.97078
109.55	0.33333	0.93658
109.6	3	1.0496
109.65	3	1.0987
109.7	2.9333	0.62136
109.75	3	0.59633
109.8	0.8	0.79562
109.85	0.46667	0.80876
109.9	0.73333	0.90648
109.95	3	1.1423
110	2.8	0.96233
110.05	3	0.85733
110.1	2.3333	1.1414
110.15	1.1333	1.5035
110.2	3	1.3202
110.25	2.7333	1.2081
110.3	3	0.8805
110.35	3	1.0794
110.4	1.8	1.5949
110.45	0.66667	1.2816
110.5	0.33333	1.6268
110.55	2.4667	1.4035
110.6	3	1.2848
110.65	3	1.2029
110.7	3	1.026
110.75	3	1.092
110.8	0.93333	0.94745
110.85	0.33333	0.92749
110.9	0.93333	0.9545
110.95	0.73333	1.0078
111	0.33333	1.0044
111.05	0.53333	0.97657
111.1	0.4	0.92569
111.15	0.93333	1.1022
111.2	2.7333	1.2536
111.25	3	1.0274
111.3	3	1.1538
111.35	3	0.92613
111.4	3	1.0789
111.45	3	1.0452
111.5	3	1.0895
111.55	3	1.0341
111.6	3	0.72219
111.65	3	0.90765
111.7	0.46667	1.0759
111.75	0.73333	1.0866
111.8	0.46667	1.1357
111.85	0.33333	1.3832
111.9	0.6	1.4878
111.95	0.73333	1.5364
[truncated: 161 more rows]

## Sheet: peripheral_1MS114
Time [hrs]	Waking [min/3min]	Bioluminescence	Wake bouts (='1') and sleep bouts (='0')
12.05	0.333333	352.09
12.1	1.6	344.18
12.15	3	366.11
12.2	3	305.66
12.25	3	279.29
12.3	0.33333	362.82
12.35	0.66667	408.3
12.4	0.86667	440.08
12.45	0.46667	423.26
12.5	0.33333	405.66
12.55	2.4667	401.1
12.6	3	256.1
12.65	3	368.72
12.7	3	321.43
12.75	3	331.25
12.8	2.4	293.54
12.85	1	475.09
12.9	0	591.27
12.95	1.2	619.11
13	3	555.15
13.05	1	448.31
13.1	0.73333	439.02
13.15	3	376.31
13.2	3	318.33
13.25	2.3333	388.39
13.3	0.73333	395.86
13.35	0.73333	446.68
13.4	0.8	405.1
13.45	0.33333	371.1
13.5	1.7333	393.96
13.55	3	363.67
13.6	3	230.25
13.65	3	227.87
13.7	3	290.31
13.75	3	256.27
13.8	3	368.93
13.85	3	380.31
13.9	0.93333	615.22
13.95	0.53333	597.17
14	0.26667	574.46
14.05	0.8	546.15
14.1	1.7333	553.28
14.15	0.66667	521.5
14.2	3	484.52
14.25	3	434.59
14.3	3	300.83
14.35	1.2	376.25
14.4	0.6	339.85
14.45	2.2667	446.8
14.5	3	509.4
14.55	3	446.93
14.6	2.8	379.47
14.65	1.1333	388.91
14.7	0.6	431.11
14.75	0.4	467.08
14.8	0.33333	421.64
14.85	0.93333	457.1
14.9	0.26667	406.12
14.95	0.13333	368.57
15	0.4	324.48
15.05	3	281.52
15.1	3	214.34
15.15	3	301.25
15.2	1.6	462.03
15.25	0.73333	459.36
15.3	1.1333	544.54
15.35	1.0667	527.2
15.4	3	526.84	1
15.45	3	399.95	1
15.5	3	293.46	1
15.55	3	270.17	1
15.6	3	264.42	1
15.65	3	350.57	1
15.7	3	608.57	1
15.75	1.6	557.72	0
15.8	0.66667	782.32	0
15.85	0.66667	866.81	0
15.9	0.13333	817.1	0
15.95	0	709.05	0
16	0.13333	622.49	0
16.05	1.4	607.76	0
16.1	0.33333	566.29	0
16.15	1.1333	528.58	0
16.2	0.8	553.62	0
16.25	0	479.98	1
16.3	3	510.04	1
16.35	3	407.77	1
16.4	3	341.53	1
16.45	3	367.77	1
16.5	3	448.9	1
16.55	3	414.61	1
16.6	3	490.74	1
16.65	0.33333	596.63	0
16.7	1.0667	659.9	0
16.75	1.2	714.76	0
16.8	0.8	647.29	0
16.85	0.53333	673.56	0
16.9	0.8	649.83	0
16.95	0.73333	619.74	0
17	0.6	543.84	0
17.05	2.8	460.15
17.1	3	366.51
17.15	1.5333	453.84
17.2	1.2	564.28
17.25	1.2	697.5
17.3	1.8667	608.93	1
17.35	3	502.95	1
17.4	3	407.55	1
17.45	2.8667	534.7	1
17.5	3	610.48	1
17.55	3	626.67	1
17.6	3	870.18	1
17.65	3	961.78	1
17.7	3	853.31	1
17.75	3	819.11	1
17.8	3	719.31	1
17.85	3	634.76	1
17.9	3	697.71	1
17.95	3	670.31	1
18	3	718	1
18.05	3	565.42	1
18.1	3	523.57	1
18.15	3	501.15	1
18.2	3	617.66	1
18.25	3	628.1	1
18.3	3	634.28	1
18.35	3	677.59	1
18.4	3	586.65	1
18.45	3	546.56	1
18.5	3	528.43	1
18.55	3	419.91	1
18.6	3	333.98	1
18.65	3	346.56	1
18.7	3	445.27	1
18.75	3	411.49	1
18.8	3	472	1
18.85	3	502.82	1
18.9	3	599.33	1
18.95	3	579.01	1
19	3	605.83	1
19.05	3	521.43	1
19.1	3	572.92	1
19.15	3	588.56	1
19.2	3	512.99	1
19.25	3	605.27	1
19.3	3	589.54	1
19.35	3	593.36	1
19.4	3	766	1
19.45	3	694.18	1
19.5	3	558.15	1
19.55	2.9333	673.18	1
19.6	2.5333	894.24	0
19.65	1.0667	876.35	0
19.7	0.2	874.02	0
19.75	0.066667	778.24	0
19.8	0.066667	728.72	0
19.85	0.8	673.97	0
19.9	0.53333	640.54	0
19.95	0.2	695.7	0
20	0	718.34	0
20.05	0.6	665.45	0
20.1	0.26667	603.74	0
20.15	0.4	607.2	0
20.2	0	568.47	0
20.25	0.066667	528.18	0
20.3	0.2	553.96	0
20.35	0.4	510.4	0
20.4	0.73333	461.51	0
20.45	0.066667	423.95	0
20.5	1.4	422.22	0
20.55	0.53333	465.17	0
20.6	0.46667	460.97	0
20.65	0.8	445.08	0
20.7	0.73333	422.74	0
20.75	1.0667	398.92	0
20.8	3	363.07
20.85	3	431.87
20.9	3	406.74
20.95	3	409.94
21	2.0667	505.38
21.05	1.3333	678.73
21.1	0.73333	803.87
21.15	1.6	753.91
21.2	3	527.29
21.25	3	504
21.3	3	473.13
21.35	3	499.08
21.4	3	469.61
21.45	3	544.9
21.5	3	575.74
21.55	3	504.79
21.6	3	617.45
21.65	2.0667	866.12
21.7	2.6	803.05
21.75	1	723.69
21.8	0.13333	751.45
21.85	1.5333	679.94
21.9	0.066667	645.82
21.95	0.2	640.53
22	0.66667	545.82
22.05	0.2	543.2
22.1	0.2	516.13
22.15	1.1333	559.02
22.2	0.33333	549.86
22.25	1.0667	546.97
22.3	0.2	528.63
22.35	0.93333	503.23
22.4	1.5333	485.34
22.45	0.53333	479.54
22.5	0.53333	477.38
22.55	2.2667	371.18
22.6	3	252.29
22.65	2.8667	351.29
22.7	1.8667	479.8
22.75	1.4	462.64
22.8	0.73333	430.51
22.85	2.8	440.02
22.9	1.4667	450.93
22.95	2.2	494.11
23	3	419.02
23.05	3	316.7
23.1	3	355.81
23.15	3	425.52
23.2	2.3333	466.65
23.25	1.4	607.54
23.3	1.0667	663.43
23.35	0.73333	652.61
23.4	0.4	581.63
23.45	2	515.94
23.5	0.2	433.69	0
23.55	1.3333	442.84	0
23.6	0.66667	552.75	0
23.65	0.066667	547.31	0
23.7	0	557.17	0
23.75	0.8	530.26	0
23.8	1.0667	494.44	0
23.85	0.73333	438.06	0
23.9	0.6	401.12	0
23.95	0.46667	379.7	0
24	0.86667	382.97	0
24.05	0.4	338.56	0
24.1	1.1333	361.19	0
24.15	0.46667	356.69	0
24.2	0.53333	344.6	1
24.25	2.5333	339.2	1
24.3	3	237.2	1
24.35	3	240.78	1
24.4	3	271.11	1
24.45	3	206.09	1
24.5	2.6667	587.24	1
24.55	3	585.57	1
24.6	3	499.1	1
24.65	3	614.17	1
24.7	3	510.7	1
24.75	3	436.1	1
24.8	3	524.01	1
24.85	3	481.01	1
24.9	3	426.96	1
24.95	3	354.78	1
25	3	405.69	1
25.05	3	426.43	1
25.1	3	446.8	1
25.15	3	385.47	1
25.2	3	442.24	1
25.25	3	397.44	1
25.3	2.8	401.11	1
25.35	3	452.46	1
25.4	1.6667	390.53	1
25.45	0.93333	454.86	0
25.5	0.6	463.88	0
25.55	0.33333	347.23	0
25.6	0.73333	367.43	0
25.65	0.4	394.45	0
25.7	0.13333	336.74	0
25.75	1.3333	369.98	0
25.8	0.4	341.05	0
25.85	0.26667	343.34	0
25.9	0.33333	328.6	0
25.95	0.33333	303.13	0
26	0.26667	288.24	0
26.05	2	247.58
26.1	0.6	224.53	0
26.15	0	208.68	0
26.2	0.26667	206.44	0
26.25	0.73333	246.59	0
26.3	0.6	276.19	0
26.35	0.8	284.86	0
26.4	1.1333	250.3	0
26.45	0.4	253.94	0
26.5	0.33333	221.85	0
26.55	1.3333	240.79	0
26.6	0.33333	275.61	0
26.65	0.26667	295.92	0
26.7	0.13333	300.76	0
26.75	0.6	294.6	0
26.8	0.33333	306.89	0
26.85	1.0667	277.44	0
26.9	0.53333	252.49	0
26.95	0	256.93	1
27	2.2	281.73	1
27.05	3	195.99	1
27.1	2.8	146.35	1
27.15	2.3333	215.39	1
27.2	3	223.46	1
27.25	3	209.59	1
27.3	2.2	322.28	1
27.35	2.6	412.05	1
27.4	3	351.34	1
27.45	2.3333	398.23	1
27.5	0.66667	394.29
27.55	1.8	354.8
27.6	1.6667	359.82
27.65	0.6	346.16
27.7	0.46667	283.71
27.75	0.93333	266.29
27.8	2.9333	228.02
27.85	0.8	236.42
27.9	1.4667	219.15
27.95	0.66667	202.88
28	2.2667	252.35
28.05	0.33333	263.12
28.1	0.2	262.65
28.15	0.4	262.67
28.2	0.73333	260.16
28.25	0.26667	229.69
28.3	1	218.12
28.35	0.26667	204.45
28.4	0.066667	205.47
28.45	0.066667	182
28.5	1.8667	184.09
28.55	0.53333	154.31	0
28.6	0.53333	149.86	0
28.65	0.8	138.24	0
28.7	0.86667	176.46	0
28.75	0.13333	167.21	0
28.8	0.4	170.61	0
28.85	0.13333	161.77	0
28.9	1.1333	149.59	0
28.95	1.1333	181.81	0
29	0.8	178.27	0
29.05	0.4	185.78	0
29.1	0.46667	195.07	0
29.15	0.13333	212.11	0
29.2	0.6	232.58	0
29.25	0.8	238.11	1
29.3	1.9333	231.91	1
29.35	3	141.58	1
29.4	3	135.86	1
29.45	3	163.28	1
29.5	3	198.93	1
29.55	3	156.37	1
29.6	3	363.46	1
29.65	3	356.39	1
29.7	3	399.14	1
29.75	1.3333	360.05	0
29.8	1.3333	427.87	0
29.85	0.46667	446.01	0
29.9	1.4	408.29	0
29.95	1	373.49	0
30	0.73333	364.67	0
30.05	0.86667	298.09	0
30.1	0.73333	232.22	0
30.15	0.93333	219.78	0
30.2	0.46667	191.86	0
30.25	0.66667	186.06	0
30.3	0.26667	170.51	0
30.35	0.26667	155.17	0
30.4	0.46667	153.59	0
30.45	1	162.99	0
30.5	0.93333	215.74	0
30.55	1	213.12	0
30.6	0.86667	214.01	0
30.65	1.0667	218.03	0
30.7	0.33333	230.69	0
30.75	1.3333	230.4	0
30.8	0.66667	177.65	0
30.85	0.46667	180.27	0
30.9	0.46667	185	0
30.95	0.2	170.22	0
31	1.1333	206.02	0
31.05	0.33333	243.28	0
31.1	0.26667	245.04	0
31.15	0.53333	236.22	0
31.2	0.33333	249.46	0
31.25	0.2	238.35	0
31.3	2.2667	241.26
31.35	0.53333	224.25
31.4	0.4	196.45
31.45	1.2667	195.59
31.5	0.13333	183.58
31.55	0.53333	209.56
31.6	0.53333	200.34
31.65	1.4	241.47
31.7	1.8	238.6
31.75	0.86667	225.42
31.8	0.86667	220.06
31.85	1.2	239.6
31.9	1.0667	251.77
31.95	0.73333	244.68
32	2.8667	192.53
32.05	3	153.68
32.1	3	226.66
32.15	3	199.94
32.2	3	199.52
32.25	3	336.96
32.3	3	315.18
32.35	3	331.45
32.4	3	352.56
32.45	3	359.82
32.5	3	334.16
32.55	3	334.33
32.6	3	290.24
32.65	3	304.4
32.7	3	320
32.75	3	261.48
32.8	3	249.93
32.85	3	265.46
32.9	3	279.32
32.95	3	276.39
33	3	270.37
33.05	3	245.85
33.1	3	233.7
33.15	3	227.12
33.2	3	217.78
33.25	2.4667	193.49
33.3	0.53333	224.02
33.35	0.8	282.16
33.4	0.66667	356.4
33.45	0.46667	335.46
33.5	0.2	317.24
33.55	1.8	299.24
33.6	1.0667	282.44
33.65	0.4	285.79
33.7	0.46667	274.12
33.75	0.46667	262.54
33.8	0.66667	249.14
33.85	1.2667	260.54
33.9	0.73333	264.94
33.95	1	258.67
34	0.6	205.8
34.05	0.4	207.49
34.1	1.6	234.56
34.15	0.86667	214.47
34.2	3	183.04
34.25	3	150
34.3	2.8	216.93
34.35	3	170.26
34.4	1.2667	271.44
34.45	0.66667	321.86
34.5	1.0667	345.24
34.55	2.7333	464.32
34.6	3	399.14
34.65	3	351.32
34.7	3	302.74
34.75	3	312.36
34.8	3	364.78
34.85	3	382.05
34.9	3	418.42
34.95	3	405.31
35	3	378.93
35.05	2.5333	391.44
35.1	0.93333	498.75
35.15	0.46667	633.46
35.2	0.4	665.24
35.25	1.2667	622.26
35.3	1.6	549.08
35.35	0.86667	523.5
35.4	0.4	515.21
35.45	0.73333	532.79
35.5	0.4	511.7
35.55	2.0667	375.83
35.6	3	325.23
35.65	3	291.83
35.7	3	467.91
35.75	3	312.11
35.8	3	376.6
35.85	3	475.24
35.9	3	477.35
35.95	3	468.88
36	3	474.91
36.05	3	457.75
36.1	3	484.53
36.15	3	521.7
36.2	3	529.01
36.25	3	488.1
36.3	3	535.65
36.35	3	473.34
36.4	3	386.43
36.45	3	453.07
36.5	0.53333	537.78
36.55	0.4	509.27
36.6	2.2667	571.53
36.65	0.66667	630.15
36.7	0.8	583.2
36.75	0.2	524.02
36.8	0.33333	518
36.85	2.2667	520.75
36.9	3	369.26
36.95	3	306.35
37	3	371.48
37.05	3	430.23
37.1	3	349.21
37.15	3	515.21
37.2	3	515.01
37.25	3	419.36
37.3	3	452.76
37.35	3	452.96
37.4	3	485.58
37.45	3	423.24
37.5	3	453.82
37.55	3	458.93
37.6	3	477.06
37.65	3	459.93
37.7	3	483.82
37.75	3	465.57
37.8	3	508.88
37.85	3	476.39
37.9	3	528.74
37.95	3	484.16
38	3	472.03
38.05	2.6667	458.65
38.1	1.4667	515.94
38.15	1.4	455.94
38.2	3	362.05
38.25	3	446.73
38.3	3	541.49
38.35	3	441.6
38.4	3	457.86
38.45	3	348.24
38.5	2.8667	381.55
38.55	3	561.73
38.6	3	560.28
38.65	3	508.52
38.7	3	432.5
38.75	3	551.25
38.8	3	548.14
38.85	3	528.74
38.9	2.8	541.36
38.95	3	541.27
39	2.9333	468.69
39.05	3	493.47
39.1	2.8667	504.67
39.15	2.5333	527.46
39.2	3	509.13
39.25	2.8667	492.26
39.3	2.2	467.35
39.35	3	471.21
39.4	3	440.99
39.45	3	510.41
39.5	3	510.83
39.55	2.8667	486.28
39.6	3	481.7
39.65	2.8667	496.9
39.7	2.6	484.03
39.75	2.8	466.18
39.8	2.8	442.51
39.85	3	515.16
39.9	3	454.49
39.95	3	553.02
40	2.2	586.75
40.05	3	534.26
40.1	1.7333	568.19
40.15	2.2	556.24
40.2	2.2	567.04
40.25	1.3333	633.95
40.3	2.6667	569.34
40.35	3	477.19
40.4	3	508.32
40.45	1.7333	652.32
40.5	3	473.41
40.55	3	485.18
40.6	2.8	484.16
40.65	3	483.18
40.7	3	675.89
40.75	3	508.24
40.8	2.1333	547.93
40.85	2.6	546.95
40.9	2.4667	503.97
40.95	3	546.19
41	1.7333	478.37
41.05	2.7333	527.5
41.1	3	528.52
41.15	2.8667	563.1
41.2	3	527.61
41.25	3	475.65
41.3	3	541.67
41.35	3	454.32
41.4	3	426.67
41.45	3	591.07
41.5	2.1333	645.93
41.55	0.066667	712.13
41.6	0.73333	645.93
41.65	0	515.11
41.7	1.8667	566.97
41.75	1	764.17
41.8	0.066667	819.88
41.85	0.13333	818.37
41.9	0.26667	846.01
41.95	0.53333	856.74
42	0.26667	864.28
42.05	0.33333	836.96
42.1	0.2	824.98
42.15	0.26667	784.18
42.2	0.33333	774.63
42.25	0.33333	761.49
42.3	0.4	777.2
42.35	0.26667	762.02
42.4	1.7333	713.33
42.45	2.4667	630.97
42.5	1.4	633.55
42.55	1	609.84
42.6	1.4667	728.1
42.65	3	576.92
42.7	1.4667	704.63
42.75	3	471.08	1
42.8	2.8	585.9	1
42.85	3	570.23	1
42.9	3	506.72	1
42.95	3	637.41	1
43	3	862.58	1
43.05	3	918.29	1
43.1	3	1146.3	1
43.15	3	1440.4	1
43.2	3	976.87	1
43.25	3	1235.1	1
43.3	3	1331	1
43.35	3	1270.8	1
43.4	3	1247.3	1
43.45	3	1282.8	1
43.5	3	1213	1
43.55	3	1157.8	1
43.6	3	1064.7	1
43.65	3	1030.2	1
43.7	3	927.1	1
43.75	3	998.05	1
43.8	3	865.94	1
43.85	3	835.29	1
43.9	3	801.67	1
43.95	3	833.47	1
44	3	793.42	1
44.05	3	756.71	1
44.1	3	829.44	1
44.15	3	802.64	1
44.2	3	729.95	1
44.25	3	755.75	1
44.3	3	1014.5	1
44.35	3	766.61	1
44.4	3	843.85	1
44.45	3	718.41	1
44.5	3	807.47	1
44.55	3	814.54	1
44.6	3	653.76	1
44.65	3	584.98	1
44.7	2.6667	598.07	1
44.75	1.8667	675.38	0
44.8	0.66667	878.07	0
44.85	0.13333	963.78	0
44.9	0.2	945.75	0
44.95	0.26667	918.08	0
45	1.4667	830.91	0
45.05	0.13333	808.39	0
45.1	0.13333	768.64	0
45.15	0.13333	753.55	0
45.2	0	731.46	0
45.25	1.2	771.05	0
45.3	0.8	737.1	0
45.35	0.53333	685.67	0
45.4	0.6	685.41	0
45.45	0.26667	654.87	0
45.5	0.33333	628.65	0
45.55	0.2	597.49	0
45.6	0.33333	591.31	0
45.65	0.2	614.35	0
45.7	0.26667	604.04	0
45.75	0.6	577.77	0
45.8	0.93333	598.86	0
45.85	0.8	586.48	0
45.9	0.66667	575.66	0
45.95	0.4	585.21	0
46	0.26667	580.12	0
46.05	0.6	571.37	0
46.1	0.2	573.14	0
46.15	0.53333	557.32	0
46.2	1.9333	545.87
46.25	0.93333	611.58
46.3	0.26667	666.45
46.35	0.8	661.27
46.4	1.2667	622.4
46.45	0.93333	621.78
46.5	1.2667	591.09
46.55	1.0667	655.35
46.6	0.86667	646.37
46.65	0.6	642.42
46.7	1.4	620.15
46.75	0.86667	599.5
46.8	0.66667	615.41
46.85	1.2667	588.34
46.9	0	589.63
46.95	0.46667	582.3
47	0.4	564.72
47.05	1	564.47
47.1	0.6	566.4
47.15	0.86667	555.98
47.2	1	563.76
47.25	0.53333	550.62
47.3	1.6	513
47.35	2.0667	451.8
47.4	0.93333	519.17
47.45	1.1333	540.86
47.5	1.0667	551.44
47.55	0.46667	553.24
47.6	1.8	527.81
47.65	2.5333	434.63
47.7	1.0667	448.21
47.75	0.53333	442.61
47.8	3	403.32
47.85	2.7333	422.14
47.9	1.3333	539.36
47.95	0.93333	562.03
48	1	520.98
48.05	2.1333	541.71	1
48.1	1.8667	500.69	1
48.15	2.8	482.11	1
48.2	2.6667	512.55	1
48.25	3	469.06	1
48.3	3	381.86	1
48.35	3	415.06	1
48.4	3	870.32	1
48.45	3	1239.7	1
48.5	3	999.9	1
48.55	3	1477.6	1
48.6	3	1442.3	1
48.65	3	1057.5	1
48.7	3	980.69	1
48.75	3	1234.8	1
48.8	3	1047.9	1
48.85	2.8667	681.91	1
48.9	3	849.69	1
48.95	2.2	917.29	0
49	0.4	1013	0
49.05	0.33333	939.73	0
49.1	0.53333	921.59	0
49.15	0.2	837.7	0
49.2	0.066667	788.37	0
49.25	0.33333	749.95	0
49.3	0.13333	754.97	0
49.35	0.8	708.81	0
49.4	0.66667	735.32	0
49.45	0.066667	750.38	0
49.5	0.066667	717.47	0
49.55	0.26667	663.14	0
49.6	0.26667	652.16	0
49.65	0.46667	606.65	0
49.7	0.2	593	0
49.75	0.33333	590.26	0
49.8	0.2	590	0
49.85	0.2	581.28	0
49.9	0.13333	555.64	0
49.95	0.13333	530.06	0
50	0.73333	529.06	0
50.05	0.33333	527.41	0
50.1	0.53333	504.83	0
50.15	0.33333	479.99	0
50.2	1.0667	456.63	0
50.25	0.53333	445.96	0
50.3	0.53333	428.21	0
50.35	0.33333	414.09	0
50.4	0.46667	407.69	0
50.45	0.4	402.76	0
50.5	0.2	390.73	0
50.55	0.66667	377.84	0
50.6	2.3333	382.64
50.65	2.3333	384.6
50.7	1.4	427.02
50.75	1.8667	417.77	1
50.8	2.5333	407.59	1
50.85	2.8667	405.08	1
50.9	2.9333	345.32	1
50.95	3	353.34	1
51	3	336.05	1
51.05	3	282.41	1
51.1	3	291.12	1
51.15	3	484.12	1
51.2	3	504.74	1
51.25	3	681.4	1
51.3	3	712.07	1
51.35	3	841.29	1
51.4	3	813.66	1
51.45	3	767.02	1
51.5	3	804.75	1
51.55	3	771.13	1
51.6	3	700.13	1
51.65	3	678.48	1
51.7	3	623.86	1
51.75	3	578.59	1
51.8	3	583.54	1
51.85	3	557.52	1
51.9	2.6667	571.36	1
51.95	3	492.03	1
52	3	466.47	1
52.05	3	473.82	1
52.1	3	529.58	1
52.15	3	498.62	1
52.2	3	433.04	1
52.25	3	412.73	1
52.3	3	386.2	1
52.35	3	374.46	1
52.4	3	396.7	1
52.45	3	373.7	1
52.5	2.9333	339.52	0
52.55	1	375.12	0
52.6	0.46667	350.37	0
52.65	0	265.59	0
52.7	0.66667	282.56	0
52.75	0.46667	299.87	0
52.8	0.33333	293.6	0
52.85	0.53333	288.94	0
52.9	0.26667	288.31	0
52.95	0.26667	274.91	0
53	0.8	269.35	0
53.05	0.26667	262.31	0
53.1	0.46667	262.8	0
53.15	0.2	260.75	0
53.2	0.26667	256.57	0
53.25	0.46667	253.73	0
53.3	0.26667	253.37	0
53.35	1.6	252.97
53.4	0.73333	255.5
53.45	0.53333	255.79
53.5	1	251.81
53.55	1.0667	253.32
53.6	0	258.32
53.65	0.2	248
53.7	0.4	251.76
53.75	0.6	243.65
53.8	1.4	234.04
53.85	1.2	226.75
53.9	0.73333	232.06
53.95	0.66667	228.91
54	0.73333	230.9
54.05	1	221.9
54.1	0.73333	238.86
54.15	0.4	219.52
54.2	0.86667	213.21
54.25	1.9333	254.01
54.3	1.4667	252.96
54.35	3	174.23
54.4	3	191.09
54.45	2.5333	184.31
54.5	2.5333	164.69
54.55	1.8667	277.09
54.6	3	381.56
54.65	3	494.46
54.7	3	516.29
54.75	3	465.77
54.8	3	430.53
54.85	3	453.42
54.9	3	495.99
54.95	3	485.08
55	3	450.41
55.05	3	361.14
55.1	3	435.83
55.15	3	415.23
55.2	3	349.14
55.25	3	343.67
55.3	3	277.87
55.35	3	290.67
55.4	2.9333	323.09
55.45	3	325
55.5	3	258.4
55.55	3	259.46
55.6	3	265.57
55.65	3	272.26
55.7	2.9333	247.86
55.75	3	243.97
55.8	3	243.94
55.85	2.8667	245.03
55.9	3	232.99
55.95	3	244.32
56	3	227.63
56.05	3	241.65
56.1	3	249.27
56.15	3	244.4
56.2	3	233.85
56.25	3	239.31
56.3	3	225.55
56.35	3	213.26
56.4	3	236.93
56.45	3	241.42
56.5	3	226.9
56.55	3	230.61
56.6	3	218.41
56.65	2.7333	201.88
56.7	3	198.43
56.75	3	206.27
56.8	3	207.41
56.85	3	216.85
56.9	3	201.38
56.95	3	216.96
57	3	225.22
57.05	3	215.04
57.1	3	220.31
57.15	3	206.29
57.2	3	230.91
57.25	3	235.97
57.3	3	224.7
57.35	3	210.92
57.4	3	225.48
57.45	3	212.43
57.5	3	162.41
57.55	3	181.7
57.6	3	176.96
57.65	3	167.98
57.7	3	210.54
57.75	3	185.4
57.8	3	203.78
57.85	3	215.36
57.9	3	294.02
57.95	3	336.73
58	3	331.62
58.05	2.7333	268.31
58.1	0.13333	270.62
58.15	3	215.24
58.2	3	247.28
58.25	0.66667	321.61	0
58.3	0	312.88	0
58.35	0.4	309.61	0
58.4	0.2	303.85	0
58.45	0.53333	292.63	0
58.5	0.6	286.96	0
58.55	0.53333	279.89	0
58.6	0.066667	290.96	0
58.65	0.2	276.71	0
58.7	0.26667	267.71	0
58.75	0.53333	250.06	0
58.8	0.2	258.02	0
58.85	1	241.8	0
58.9	0.4	245.1	0
58.95	1.0667	242.55	0
59	0.26667	238.5	0
59.05	0.2	230.26	0
59.1	0.2	234.23	0
59.15	1.2667	228.59	0
59.2	1.2667	243.99	0
59.25	0.6	251.38	0
59.3	1.4667	254.69	0
59.35	0.66667	264.69	0
59.4	0.66667	255.98	1
59.45	1.9333	251.58	1
59.5	3	228.71	1
59.55	3	243.09	1
59.6	3	233.95	1
59.65	3	216.33	1
59.7	3	229.35	1
59.75	3	247.08	1
59.8	2.4667	261.28	1
59.85	0.26667	278.9	0
59.9	0	333.59	0
59.95	0.86667	360.43	0
60	0.13333	343.3	0
60.05	0.2	324.52	0
60.1	0.46667	311.76	0
60.15	1.6	280.47
60.2	0.26667	262
60.25	0.8	256.82
60.3	1.6	263.42
60.35	1.2	281.02
60.4	0.46667	280.69
60.45	0.73333	261.22
60.5	1.4	266.15
60.55	1	289.93
60.6	2.5333	243.55	1
60.65	3	266.15	1
60.7	3	269.79	1
60.75	3	305.14	1
60.8	3	321.59	1
60.85	3	333.99	1
60.9	3	330.54	1
60.95	2.8	357.29	1
61	2.8	280.4	0
61.05	0.2	329.56	0
61.1	0.4	318.49	0
61.15	0.73333	420.69	0
61.2	0.86667	413.86	0
61.25	0.66667	396.82	0
61.3	0.86667	298.2	0
61.35	1.4667	320.17	0
61.4	3	238.41
61.45	2	282.3
61.5	1.4	304.99
61.55	2.4667	268.1	1
61.6	3	302.76	1
61.65	3	318.25	1
61.7	3	354.58	1
61.75	3	343.45	1
61.8	3	341.63	1
61.85	3	216.2	1
61.9	3	208.38	1
61.95	3	219.04	1
62	3	234.15	1
62.05	3	349.09	0
62.1	1.4	467.88	0
62.15	0.6	537.77	0
62.2	0.26667	564.62	0
62.25	0	505.75	0
62.3	0.53333	491.15	0
62.35	0.26667	482.3	0
62.4	0.86667	427.5	0
62.45	0.066667	408.05	0
62.5	1.9333	364.27
62.55	0	387.87
62.6	0.73333	367.18
62.65	1.2	354.71
62.7	1.6667	349.18
62.75	0.46667	357.91
62.8	0.33333	346.89
62.85	0.86667	337.55
62.9	0.4	336.71
62.95	0.6	322.75
63	0.86667	339.5
63.05	1.8667	321.75
63.1	1.0667	334.39
63.15	0.26667	326.57
63.2	0.73333	322.88
63.25	0.73333	321.83
63.3	3	311.03	1
63.35	2.7333	313.98	1
63.4	3	334.2	1
63.45	3	301.18	1
63.5	3	334.42	1
63.55	3	332.27	1
63.6	3	339.2	1
63.65	3	399.06	1
63.7	3	479.49	1
63.75	3	516.77	1
63.8	3	524.82	1
63.85	2.2667	401.28	0
63.9	0.4	439.35	0
63.95	0.8	459.92	0
64	0.33333	381.1	0
64.05	0.73333	408.1	0
64.1	0.066667	396.72	0
64.15	1	416.43	0
64.2	0.4	412.05	0
64.25	0.6	414.54	0
64.3	0.33333	393.27	0
64.35	0.6	367.91	0
64.4	1.1333	365.24	0
64.45	0.93333	352.07	1
64.5	2.2667	290.51	1
64.55	3	253.42	1
64.6	3	324.11	1
64.65	3	391.3	1
64.7	3	412.9	1
64.75	3	417.77	1
64.8	3	377.59	1
64.85	3	325.41	1
64.9	3	322.54	1
64.95	3	316.12	1
65	3	339.43	1
65.05	3	439.07	1
65.1	3	604.87	1
65.15	3	583.29	1
65.2	2.3333	568.82	1
65.25	0.53333	567.95	0
65.3	0.2	646.69	0
65.35	0.26667	606.66	0
65.4	0.33333	557.33	0
65.45	0.93333	505.82	0
65.5	0.26667	480.66	0
65.55	0.86667	458.57	0
65.6	0.066667	442.5	0
65.65	0.2	413.81	0
65.7	0.6	405.16	0
65.75	0.066667	368.52	0
65.8	0.46667	339.23	0
65.85	0.33333	368.94	0
65.9	0.13333	395.71	0
65.95	0.66667	401.34	0
66	0.6	398.22	0
66.05	0.8	381.11	0
66.1	1.4	358.13	0
66.15	1.8667	312.71
66.2	1.4667	320.31
66.25	3	263.06
66.3	2.9333	251.1
66.35	1.5333	321.81
66.4	3	295.92
66.45	1.2667	349.99
66.5	2.1333	346.54	1
66.55	3	309.19	1
66.6	3	321.21	1
66.65	3	313.41	1
66.7	3	346.54	1
66.75	3	413.07	1
66.8	3	414.6	1
66.85	3	444.33	1
66.9	3	419.04	1
66.95	3	419.75	1
67	3	406.95	0
67.05	1.4667	349.73	0
67.1	0.66667	387.93	0
67.15	0.46667	384.04	0
67.2	1	377.88	0
67.25	0.066667	398.92	0
67.3	0.46667	399.37	0
67.35	0.2	390.61	0
67.4	0.86667	418.3	0
67.45	0.53333	422.01	0
67.5	0.93333	395.78	0
67.55	1.4667	372.23	1
67.6	2.8667	273.78	1
67.65	3	268.73	1
67.7	2.2	264.51	1
67.75	3	281.91	1
67.8	3	251.55	1
67.85	3	339.26	1
67.9	3	359.24	1
67.95	3	371.15	1
68	3	373.48	1
68.05	3	358.14	1
68.1	3	393.65	1
68.15	3	363.68	1
68.2	3	374.63	1
68.25	3	359.94	1
68.3	3	348.67	1
68.35	3	335.8	1
68.4	3	258.65	1
68.45	3	231.51	1
68.5	3	237.62	1
68.55	3	253.62	1
68.6	3	335.95	1
68.65	3	385.95	1
68.7	3	370.35	1
68.75	3	378.04	1
68.8	3	345.9	1
68.85	3	306.83	1
68.9	3	331.94	1
68.95	3	288.48	1
69	3	308.1	1
69.05	3	285.07	1
69.1	1.3333	325.58	0
69.15	0.6	363.89	0
69.2	0.46667	385.67	0
69.25	0.13333	394.96	0
69.3	0	369.07	0
69.35	0	337.15	0
69.4	0.46667	313.93	0
69.45	0	302.51	0
69.5	0.066667	289.66	0
69.55	1.0667	278.46	0
69.6	0.2	285.68	0
69.65	0.66667	258.08	0
69.7	0.066667	253.83	0
69.75	0	256.41	0
69.8	0.2	253.9	0
69.85	0.46667	245.61	0
69.9	0.066667	258.92	0
69.95	0	255.52	0
70	0.066667	254.56	0
70.05	0.2	247.58	1
70.1	2.2667	222.13	1
70.15	3	265.87	1
70.2	3	269.53	1
70.25	3	237.44	1
70.3	3	267.15	1
70.35	3	273.3	1
70.4	3	263.86	1
70.45	3	258.37	1
70.5	3	231.06	1
70.55	1.4667	317.19	0
70.6	0.6	330.85	0
70.65	0.8	307.96	0
70.7	0.066667	317.92	0
70.75	0.13333	309.58	0
70.8	0.73333	283.51	0
70.85	0.13333	271.94	0
70.9	0.2	273.38	0
70.95	0.4	271.64	0
71	1.0667	271.35	0
71.05	0.46667	252.62	0
71.1	0.4	248.6	0
71.15	0	246.04	0
71.2	0.13333	243.55	0
71.25	0.33333	242.3	0
71.3	0.6	252.99	0
71.35	1.0667	247.79	0
71.4	0.13333	243.68	0
71.45	0.26667	247.92	0
71.5	0.93333	243.56	0
71.55	1.0667	239.14	0
71.6	0.6	234.76	0
71.65	0.2	229.71	0
71.7	0.066667	232.71	0
71.75	0.46667	221.47	0
71.8	0.2	220.22	1
71.85	2.2	235.57	1
71.9	3	231.48	1
71.95	3	238.2	1
72	2.9333		1
72.05	2.6667		1
72.1	2.6667		1
72.15	3		1
72.2	3		1
72.25	3		1
72.3	3		1
72.35	3		1
72.4	3		1
72.45	3		1
72.5	3		1
72.55	3		1
72.6	3		1
72.65	3		1
72.7	3		1
72.75	3		1
72.8	3		1
72.85	3		1
72.9	3		1
72.95	3		1
73	3		1
73.05	3		1
73.1	3		1
73.15	3		1
73.2	3		1
73.25	3		1
73.3	3		1
73.35	3		1
73.4	3		1
73.45	2.9333		1
73.5	2.8		1
73.55	2.9333		1
73.6	3		1
73.65	3		1
73.7	3		1
73.75	3		1
73.8	3		1
73.85	2.6667		1
73.9	3		1
73.95	3		1
74	3		1
74.05	3		1
74.1	3		1
74.15	2.8		1
74.2	3		1
74.25	3		1
74.3	3		1
74.35	3		1
74.4	3		1
74.45	3		1
74.5	3		1
74.55	3		1
74.6	3		1
74.65	3		1
74.7	3		1
74.75	3		1
74.8	3		1
74.85	3		1
74.9	3		1
74.95	3		1
75	3		1
75.05	3		1
75.1	3		1
75.15	2.8667		1
75.2	2.3333		1
75.25	2.0667		1
75.3	2.2		1
75.35	2.3333		1
75.4	2		1
75.45	1.2667
75.5	2.7333
75.55	2.6667
75.6	2.3333
75.65	2.1333
75.7	3
75.75	3
75.8	3
75.85	3
75.9	3
75.95	3
76	2.9333
76.05	3
76.1	3
76.15	3
76.2	3
76.25	3
76.3	2.4667
76.35	3
76.4	2.5333
76.45	3
76.5	3
76.55	3
76.6	3
76.65	3
76.7	3
76.75	3
76.8	3
76.85	3
76.9	3
76.95	3
77	3
77.05	3
77.1	3
77.15	2.7333
77.2	3
77.25	3
77.3	3
77.35	3
77.4	2.2
77.45	3
77.5	3
77.55	2.6667
77.6	3
77.65	2.6
77.7	3
77.75	3
77.8	2.6667
77.85	2.8667
77.9	3
77.95	3
78	2.9333
78.05	2.8667
78.1	3
78.15	3
78.2	2.4	0.55204
78.25	2.6667	0.51653
78.3	0.4	0.69936
78.35	0.13333	0.639
78.4	0.2	0.63518
78.45	0.2	0.63458
78.5	0.2	0.58565
78.55	0.46667	0.56929
78.6	0.066667	0.55108
78.65	0.46667	0.53135
78.7	0	0.52192
78.75	0.2	0.53386
78.8	0.13333	0.5475
78.85	0.46667	0.53636
78.9	0.13333	0.5333
78.95	0.13333	0.52406
79	0	0.51733
79.05	0.33333	0.54046
79.1	0.13333	0.55315
79.15	1.2667	0.53985
79.2	2.9333	0.54843
79.25	0.6	0.58159
79.3	0.26667	0.59258
79.35	0.33333	0.61651
79.4	0.2	0.59623
79.45	0.066667	0.58088
79.5	0.33333	0.60742
79.55	0	0.6318
79.6	0.13333	0.6199
79.65	0.26667	0.61935
79.7	0	0.61468
79.75	0.46667	0.61483
79.8	0.2	0.60725
79.85	0.4	0.62536
79.9	0.26667	0.63624
79.95	0	0.69439
80	0	0.69329
80.05	0.066667	0.70352
80.1	0.73333	0.69197
80.15	1.6667	0.67837
80.2	0.4	0.64932
80.25	0.86667	0.71665
80.3	0.2	0.89567
80.35	0.33333	0.99261
80.4	0.2	1.0663
80.45	0.33333	1.0242
80.5	2.1333	0.88026
80.55	2.9333	0.92305
80.6	3	0.80574
80.65	0.86667	0.9255
80.7	2.2667	1.0603
80.75	0.13333	1.0369
80.8	0.46667	1.1824
80.85	0.26667	1.109
80.9	0	1.1064
80.95	0.13333	1.0413
81	0.53333	0.98654
81.05	0.6	0.99311
81.1	0.6	0.84204
81.15	0.8	0.79908
81.2	3	0.87299
81.25	3	0.7209
81.3	3	0.66451
81.35	3	1.2395
81.4	2.0667	1.591
81.45	1.3333	1.4713
81.5	2.8	1.0849
81.55	2.6667	0.83714
81.6	3	0.78455
81.65	3	1.2094
81.7	3	1.162
81.75	3	1.1987
81.8	0.33333	1.0433
81.85	0.53333	0.91188
81.9	0.6	1.3078
81.95	0.73333	1.4233
82	0.2	1.368
82.05	0.4	1.2284
82.1	0	1.1237
82.15	1.1333	1.1571
82.2	0.6	1.0624
82.25	0	1.0534
82.3	0	1.0208
82.35	1	1.0984
82.4	1.7333	1.0186
82.45	3	0.76403
82.5	3	0.84105
82.55	3	0.76864
82.6	3	1.0816
82.65	3	1.1712
82.7	1.3333	1.2871
82.75	2.6667	1.2805
82.8	1.3333	0.9631
82.85	0.2	1.0723
82.9	1.5333	1.1553
82.95	0.13333	1.0729
83	0.066667	1.0729
83.05	1.4	1.0455
83.1	0.2	0.97889
83.15	0.33333	1.0025
83.2	0.93333	0.91391
83.25	1.3333	0.8115
83.3	1.0667	0.93151
83.35	0.13333	1.0352
83.4	0	0.96628
83.45	2.0667	1.0673
83.5	3	0.79713
83.55	2.8	0.92076
83.6	3	1.2046
83.65	3	1.4445
83.7	3	1.4542
83.75	2.7333	1.1979
83.8	0.33333	1.2684
83.85	0.46667	1.1421
83.9	1.3333	1.1753
83.95	0.13333	1.0467
84	0	0.92821
84.05	0.46667	0.93523
84.1	2.4	1.0538
84.15	3	0.91465
84.2	3	0.95649
84.25	3	0.99688
84.3	3	1.0652
84.35	1.7333	0.94806
84.4	0.066667	0.97098
84.45	0.86667	1.0638
84.5	0.53333	1.3259
84.55	0	1.2289
84.6	0.73333	1.1813
84.65	0.13333	1.1462
84.7	0	1.0548
84.75	2.8667	1.1015
84.8	3	1.0663
84.85	3	1.0433
84.9	3	1.0418
84.95	2.5333	0.8851
85	0.26667	1.0103
85.05	0.33333	1.1084
85.1	0.93333	1.2385
85.15	0.13333	0.97851
85.2	0.46667	1.0342
85.25	0.6	1.0828
85.3	0.2	1.045
85.35	0.66667	1.1093
85.4	0.4	1.0597
85.45	0.13333	1.0218
85.5	0.66667	0.99169
85.55	2.7333	0.98426
85.6	3	0.98049
85.65	3	1.001
85.7	3	0.79805
85.75	3	1.0747
85.8	3	1.3668
85.85	3	1.5778
85.9	3	1.8076
85.95	3	1.9122
86	3	1.7373
86.05	3	1.6138
86.1	0.6	1.3876
86.15	0.2	1.0678
86.2	2.1333	1.1094
86.25	2.7333	1.3836
86.3	0.4	1.5111
86.35	0.33333	1.4258
86.4	0.2	1.4157
86.45	0.33333	1.4576
86.5	1.5333	1.2874
86.55	0.93333	1.1441
86.6	0.53333	1.0984
86.65	1.1333	1.0024
86.7	3	1.0345
86.75	3	1.0293
86.8	3	0.9594
86.85	3	1.1195
86.9	3	1.3714
86.95	3	1.4352
87	3	1.4553
87.05	3	1.5633
87.1	3	1.4467
87.15	3	1.4726
87.2	3	1.5736
87.25	3	1.4814
87.3	3	1.4402
87.35	3	1.3673
87.4	3	1.3751
87.45	3	1.3402
87.5	3	1.3787
87.55	3	1.3613
87.6	3	1.3276
87.65	3	1.176
87.7	3	1.1896
87.75	3	1.1441
87.8	3	1.2395
87.85	3	1.2982
87.9	3	1.1267
87.95	3	1.1253
88	3	1.1801
88.05	3	1.1761
88.1	3	1.1986
88.15	3	1.247
88.2	3	1.3123
88.25	3	1.2185
88.3	3	1.2704
88.35	3	1.1432
88.4	2.8	1.1187
88.45	3	1.15
88.5	3	1.1372
88.55	3	1.1747
88.6	3	1.0816
88.65	3	1.0641
88.7	3	1.2401
88.75	3	1.0776
88.8	3	1.268
88.85	3	1.0722
88.9	2.8	1.2109
88.95	0.4	1.0421
89	0.13333	0.96277
89.05	0.26667	0.96232
89.1	0.2	0.96226
89.15	0.2	0.96693
89.2	0	0.96532
89.25	0.13333	0.9754
89.3	1.4	0.95182
89.35	0.66667	0.83736
89.4	0.26667	1.1036
89.45	1	1.0677
89.5	0.13333	1.0375
89.55	0.26667	1.0032
89.6	0.13333	0.99164
89.65	0.53333	0.94086
89.7	0.26667	0.93724
89.75	0.8	0.91105
89.8	0.8	0.86162
89.85	0.6	0.82755
89.9	1.8	0.82097
89.95	1	0.82067
90	0.6	0.86251
90.05	2.8667	0.81078
90.1	3	0.64299
90.15	2.7333	0.86837
90.2	3	0.85793
90.25	3	1.3569
90.3	3	1.4797
90.35	3	1.5077
90.4	3	1.5442
90.45	3	1.5196
90.5	3	1.5082
90.55	3	1.4927
90.6	3	1.4139
90.65	3	1.3514
90.7	3	1.2819
90.75	3	1.2722
90.8	3	1.1521
90.85	3	1.3079
90.9	3	1.18
90.95	3	1.1939
91	3	1.1523
91.05	0.8	1.1342
91.1	0.066667	1.3094
91.15	0.6	1.2888
91.2	0.13333	1.2367
91.25	0.86667	1.2086
91.3	0.33333	1.1589
91.35	0.2	1.1336
91.4	0.26667	1.1089
91.45	1.7333	1.0912
91.5	0.73333	0.98575
91.55	0.33333	0.99046
91.6	0.73333	0.95734
91.65	0.33333	0.99091
91.7	0.2	0.96782
91.75	0.26667	0.92557
91.8	0.46667	0.8919
91.85	0.13333	0.88929
91.9	0.066667	0.88834
91.95	0.26667	0.90037
92	0.2	0.86264
92.05	0.46667	0.85737
92.1	0.4	0.87327
92.15	0.4	0.84447
92.2	0.26667	0.84301
92.25	0.93333	0.81717
92.3	0.2	0.78811
92.35	0.33333	0.76503
92.4	0.6	0.75499
92.45	0.46667	0.86708
92.5	0.26667	0.8746
92.55	0.26667	0.87124
92.6	0.13333	0.86993
92.65	2.0667	0.83706
92.7	3	0.65969
92.75	2.7333	0.74719
92.8	0.93333	0.94488
92.85	1.2667	1.0106
92.9	0.93333	1.1273
92.95	0	1.0808
93	1.8667	1.2652
93.05	3	0.97918
93.1	3	0.93171
93.15	3	1.4498
93.2	3	1.3136
93.25	3	1.5555
93.3	3	1.5315
93.35	3	1.7987
93.4	3	1.7841
93.45	3	1.7865
93.5	2.0667	1.3457
93.55	0.66667	1.2609
93.6	0.2	1.2292
93.65	0.46667	1.153
93.7	0.53333	1.0367
93.75	0.73333	1.0959
93.8	0.4	1.0157
93.85	0.66667	0.99077
93.9	0.8	0.94356
93.95	1.1333	0.89252
94	1.0667	0.92488
94.05	1.5333	1.0297
94.1	0.73333	1.0125
94.15	0.33333	0.93657
94.2	0.2	0.9606
94.25	0	0.93485
94.3	0.26667	0.92547
94.35	0.53333	0.87308
94.4	0.46667	0.72928
94.45	0.26667	0.7349
94.5	0.8	0.72932
94.55	0.33333	0.71151
94.6	0.13333	0.70323
94.65	0.4	0.69339
94.7	0.26667	0.67878
94.75	0.8	0.6851
94.8	0.8	0.71415
94.85	1.5333	0.75017
94.9	0.8	0.75965
94.95	0.4	0.73682
95	0.46667	0.72919
95.05	0.86667	0.73426
95.1	0.6	0.7319
95.15	0.26667	0.7194
95.2	0.26667	0.70133
95.25	1	0.7064
95.3	0.4	0.6949
95.35	0.4	0.69977
95.4	0.4	0.69801
95.45	0.4	0.70237
95.5	1.6667	0.68541
95.55	0.4	0.72193
95.6	0.13333	0.71631
95.65	0.66667	0.7131
95.7	0.26667	0.70431
95.75	0.6	0.71128
95.8	0.33333	0.72573
95.85	0.8	0.74976
95.9	0.2	0.75041
95.95	1.3333	0.76094
96	0.46667	0.7772
96.05	0.66667	0.77459
96.1	0.33333	0.79977
96.15	0.46667	0.83905
96.2	0	0.87884
96.25	1	0.74306
96.3	0.46667	0.82254
96.35	0.2	0.85344
96.4	1	0.89579
96.45	0.6	1.0102
96.5	2.0667	1.0656
96.55	3	0.96487
96.6	3	0.93877
96.65	1.6667	1.3176
96.7	2.1333	1.4747
96.75	3	1.5013
96.8	3	1.5419
96.85	3	1.6284
96.9	3	1.6235
96.95	3	1.0545
97	3	1.3449
97.05	3	1.322
97.1	3	1.3063
97.15	3	1.2391
97.2	3	1.3018
97.25	3	1.2234
97.3	2.9333	1.1568
97.35	2.3333	1.1085
97.4	2.8667	1.1436
97.45	3	1.0485
97.5	3	1.0378
97.55	3	0.92517
97.6	3	0.8911
97.65	3	0.91693
97.7	3	0.87784
97.75	3	0.8814
97.8	3	0.97553
97.85	3	0.91592
97.9	3	0.94391
97.95	2.4667	0.82489
98	0.33333	0.90005
98.05	0.2	0.88113
98.1	0.2	0.84802
98.15	1.5333	0.82338
98.2	0.2	0.78178
98.25	0.13333	0.75644
98.3	0.4	0.73185
98.35	0.2	0.73661
98.4	1.8	0.79602
98.45	0.13333	0.81272
98.5	0.46667	0.79716
98.55	0.66667	0.78753
98.6	0.33333	0.77072
98.65	0.53333	0.75797
98.7	0	0.73017
98.75	0.6	0.72128
98.8	1	0.71591
98.85	0.53333	0.69684
98.9	0.066667	0.69458
98.95	0	0.66232
99	0.26667	0.68008
99.05	0.26667	0.65293
99.1	0.6	0.62558
99.15	0.33333	0.62563
99.2	0.2	0.60846
99.25	0.13333	0.60249
99.3	0.6	0.6054
99.35	0.53333	0.59962
99.4	0.066667	0.59792
99.45	0.86667	0.5805
99.5	0.73333	0.57518
99.55	0.26667	0.56991
99.6	0.46667	0.56293
99.65	0.46667	0.56995
99.7	0.53333	0.57075
99.75	0.26667	0.55183
99.8	0.8	0.5567
99.85	0.66667	0.56944
99.9	0.53333	0.56542
99.95	0.46667	0.56256
100	1	0.55503
100.05	0.33333	0.55447
100.1	1.3333	0.56265
100.15	1.4667	0.56656
100.2	2.1333	0.56445
100.25	1.0667	0.58211
100.3	1.5333	0.64237
100.35	3	0.79675
100.4	3	0.84291
100.45	1.9333	1.0834
100.5	2.0667	0.93377
100.55	2.8667	0.96337
100.6	3	1.5643
100.65	3	1.4854
100.7	2.9333	1.3934
100.75	3	1.2275
100.8	3	1.2265
100.85	3	1.1673
100.9	3	1.0919
100.95	3	1.1283
101	3	1.0721
101.05	2.8	1.0281
101.1	3	0.98019
101.15	3	0.93844
101.2	3	0.87632
101.25	2.6	0.84782
101.3	3	0.86503
101.35	3	0.79829
101.4	3	0.85569
101.45	3	0.85002
101.5	3	0.84535
101.55	3	0.80315
101.6	3	0.76356
101.65	3	0.7915
101.7	3	0.77855
101.75	2.8667	0.75943
101.8	3	0.80118
101.85	3	0.72345
101.9	1.6	0.68838
101.95	0.53333	0.68296
102	0	0.67834
102.05	0.73333	0.66614
102.1	0.2	0.6553
102.15	0.33333	0.66719
102.2	0.33333	0.68319
102.25	1.4	0.70456
102.3	0.66667	0.70702
102.35	0.86667	0.71389
102.4	0.53333	0.71981
102.45	0.33333	0.6904
102.5	2.2667	0.68401
102.55	1.2667	0.67246
102.6	0.6	0.69774
102.65	0.8	0.70682
102.7	1.0667	0.70536
102.75	0.86667	0.68448
102.8	0.53333	0.65809
102.85	0.66667	0.65859
102.9	0.4	0.66365
102.95	0.46667	0.66546
103	0.66667	0.65783
103.05	0.66667	0.66354
103.1	0.73333	0.65105
103.15	0.66667	0.63795
103.2	0.86667	0.6548
103.25	0.73333	0.66082
103.3	0.86667	0.67943
103.35	0.8	0.68646
103.4	0.46667	0.66974
103.45	1.2667	0.64967
103.5	0.8	0.67546
103.55	1.1333	0.71208
103.6	0.73333	0.7481
103.65	1.0667	0.70114
103.7	0.8	0.70113
103.75	1.3333	0.70464
103.8	1.4667	0.72607
103.85	1.8	0.80193
103.9	2.3333	0.8371
103.95	3	0.82771
104	3	0.90703
104.05	3	1.5728
104.1	3	1.8066
104.15	3	1.6883
104.2	3	1.5933
104.25	3	1.5238
104.3	3	1.4025
104.35	3	1.4067
104.4	3	1.336
104.45	3	1.2307
104.5	3	1.1323
104.55	3	1.0638
104.6	3	1.0387
104.65	2.6	1.0639
104.7	3	1.0673
104.75	3	1.119
104.8	3	1.071
104.85	3	1.0802
104.9	3	1.0468
104.95	3	1.1083
105	3	1.0909
105.05	3	1.0552
105.1	3	1.0297
105.15	3	1.1137
105.2	3	1.1658
105.25	3	1.1421
105.3	3	1.06
105.35	3	1.0527
105.4	3	0.9805
105.45	3	0.95652
105.5	3	0.93659
105.55	3	0.91993
105.6	3	0.93614
105.65	3	0.91782
105.7	3	0.85239
105.75	3	0.95434
105.8	3	1.0139
105.85	3	1.0232
105.9	3	0.94901
105.95	3	0.9305
106	3	1.0964
106.05	3	1.09
106.1	2.8	1.0783
106.15	0.26667	1.0584
106.2		0.8921
106.25		0.864
106.3		0.84884
106.35	2.4667	0.88858
106.4	1.4667	0.91953
106.45	1.5333	0.93408
106.5	2.6	0.9265
106.55	3	0.93834
106.6	3	0.77943
106.65	3	0.83969
106.7	3	0.9447
106.75	3	1.1749
106.8	2.8667	1.2549
106.85	2.6	1.2352
106.9	3	1.1445
106.95	3	1.337
107	3	1.0513
107.05	3	0.9369
107.1	3	0.84578
107.15	3	0.92902
107.2	3	0.94121
107.25	3	1.3062
107.3	3	1.4881
107.35	3	1.5573
107.4	3	1.3412
107.45	3	1.3361
107.5	3	1.1065
107.55	2.1333	1.0048
107.6	0.66667	1.2423
107.65	0.73333	1.307
107.7	0.4	1.2495
107.75	0.73333	1.2359
107.8	0.13333	1.1863
107.85	0.4	1.236
107.9	0.33333	1.2307
107.95	0.6	1.214
108	1.4667	1.1276
108.05	2.4	1.1154
108.1	1.0667	1.1311
108.15	1.0667	1.0852
108.2	0.93333	1.0816
108.25	1.2667	1.0558
108.3	0.066667	1.0616
108.35	0.6	1.048
108.4	0.93333	1.0772
108.45	0.73333	1.0756
108.5	1.5333	1.0685
108.55	3	1.0004
108.6	2.8	0.99817
108.65	3	1.0151
108.7	3	1.0528
108.75	3	1.2142
108.8	3	1.3834
108.85	3	1.4705
108.9	3	1.6128
108.95	3	1.72
109	3	1.5332
109.05	3	1.5593
109.1	2.0667	1.5044
109.15	2.8667	1.5559
109.2	3	1.4918
109.25	3	1.4313
109.3	3	1.3964
109.35	3	1.3069
109.4	3	1.2226
109.45	3	1.1927
109.5	3	1.2937
109.55	3	1.2922
109.6	2.8667	1.1792
109.65	0.13333	1.4134
109.7	2.1333	1.3172
109.75	3	1.3101
109.8	2.9333	1.2588
109.85	3	1.2589
109.9	3	1.2197
109.95	3	1.2403
110	3	1.2793
110.05	3	1.2769
110.1	3	1.2792
110.15	3	1.3765
110.2	3	1.3316
110.25	2.8667	1.425
110.3	2.4667	1.3863
110.35	3	1.3595
110.4	2.0667	1.3016
110.45	2.5333	1.0987
110.5	0.26667	1.5416
110.55	0.6	1.4346
110.6		1.3716
110.65		1.4037
110.7		1.2781
110.75		1.167
110.8		1.108
110.85		1.0553
110.9		1.0634
110.95		1.0454
111	2.5333	1.0435
111.05	3	0.83329
111.1		0.88472
111.15		1.0673
111.2	2.9333	0.92761
111.25		1.4529
111.3		1.4745
111.35	2.5333	1.4687
111.4	3	1.3974
111.45		1.2794
111.5	2.8667	1.1295
111.55	3	1.1234
111.6	3	1.1152
111.65	3	1.1829
111.7	3	1.3428
111.75	3	1.3246
111.8	3	1.3725
111.85	3	1.435
111.9	3	1.3508
111.95	3	1.3927
[truncated: 162 more rows]

## Sheet: peripheral_3MP71
Time [hrs]	Waking [min/3min]	Bioluminescence	Wake bouts (='1') and sleep bouts (='0')
12.05	3	202.81
12.1	3	231.67
12.15	3	200.4
12.2	3	213.85
12.25	3	226.09
12.3	2.0667	219.02
12.35	2	217.49
12.4	1.8667	216.04
12.45	1.8667	217.62
12.5	2.8667	208.22
12.55	3	209.88
12.6	2.4667	204.41
12.65	1.6	208.61
12.7	2.3333	204.36
12.75	3	197.96
12.8	3	187.69
12.85	2.8	201.83
12.9	3	194.34
12.95	3	209.04
13	2.3333	223.71
13.05	1.4667	238.66
13.1	0.4	232.53
13.15	1.0667	227.3
13.2	1.5333	211.93	1
13.25	3	207.43	1
13.3	3	203.19	1
13.35	3	194.56	1
13.4	3	201.39	1
13.45	3	225.32	1
13.5	3	235.56	1
13.55	3	247.42	1
13.6	2.9333	235.02	1
13.65	2.7333	240.58	0
13.7	0.2	260.98	0
13.75	0.13333	258.04	0
13.8	0.4	254.42	0
13.85	0.53333	251.79	0
13.9	0.26667	244.28	0
13.95	1.0667	234.97	0
14	1.2	229.19	0
14.05	0.93333	227.68	0
14.1	3	208.45
14.15	3	203.65
14.2	3	191.67
14.25	3	214.16
14.3	1.0667	232.07
14.35	0.66667	244.51
14.4	1.2	240.37
14.45	0.2	234.95
14.5	1.3333	222.57
14.55	2	236.95
14.6	0.93333	229.43
14.65	2.8667	221.03
14.7	3	212.23
14.75	3	219.27
14.8	3	220.56
14.85	1.5333	233.32
14.9	0.2	241.2
14.95	0	251.62
15	1.4	242.62
15.05	0.46667	230.8
15.1	1.0667	222.97
15.15	0.13333	217.71
15.2	1.9333	210.02
15.25	3	189.92
15.3	3	236.3
15.35	3	225.05
15.4	3	248.79
15.45	3	246.38
15.5	3	266.18
15.55	3	242.29
15.6	3	262.34
15.65	3	269.44
15.7	1.8667	311.6
15.75	0.8	317.46
15.8	1.1333	312.42
15.85	0.46667	299.77
15.9	1.4667	293.59
15.95	0.26667	258.61
16	2	239.34
16.05	2.8667	229.81
16.1	3	240.14
16.15	2.2	254.76
16.2	0.73333	270.67
16.25	1.3333	263.82
16.3	2.4	255.78	1
16.35	3	235.58	1
16.4	3	234.06	1
16.45	3	229.66	1
16.5	3	254.66	1
16.55	3	268.7	1
16.6	3	275.32	1
16.65	2.4	281.57	0
16.7	0.33333	292.9	0
16.75	0.066667	272.72	0
16.8	0.26667	273.92	0
16.85	0.6	264.14	0
16.9	0.8	247.16	0
16.95	0.6	239.56	0
17	1.4667	244.13	0
17.05	0.46667	248	0
17.1	1.3333	236.06	0
17.15	2.4	269.31	1
17.2	2.1333	266.46	1
17.25	3	247.19	1
17.3	3	240.37	1
17.35	3	238.3	1
17.4	3	256.43	1
17.45	2.8	276.39	0
17.5	1.4667	330.32	0
17.55	1.1333	323.05	0
17.6	0.33333	312.14	0
17.65	1.2	304.45	0
17.7	0.73333	294.29	0
17.75	1	291.22	0
17.8	1.0667	275.29	0
17.85	0.73333	272.88	0
17.9	0.8	275.82	0
17.95	0.4	276.37	0
18	2.9333	260.88	1
18.05	3	239.14	1
18.1	3	232.45	1
18.15	3	238.54	1
18.2	3	280.45	1
18.25	2.8667	311.47	1
18.3	3	281.8	1
18.35	2.8667	278.27	1
18.4	2.8667	271.55	1
18.45	3	305.22	1
18.5	3	298.04	1
18.55	3	291.9	1
18.6	2.7333	338.28	1
18.65	3	312.9	1
18.7	3	275.7	0
18.75	1.4667	309.9	0
18.8	0.8	313.67	0
18.85	1.2667	294.45	0
18.9	0.4	305.12	0
18.95	0	284.62	0
19	0.2	277	0
19.05	0.8	281.27	0
19.1	0.8	274.6	0
19.15	0.13333	264.91	0
19.2	0.53333	261.59	0
19.25	1.4	253.44	0
19.3	1.1333	253.64	0
19.35	0.26667	259.21	0
19.4	0.86667	258.17	0
19.45	0.26667	256.16	0
19.5	0.2	241.47	0
19.55	0.26667	238.69	0
19.6	1.3333	242.67	0
19.65	1.1333	253.67	0
19.7	0.4	259.71	0
19.75	0.13333	258.78	0
19.8	0.86667	251.46	0
19.85	0.8	256.64	0
19.9	0.33333	265.24	0
19.95	0.4	258.35	0
20	0.73333	255.9	0
20.05	2.6667	242.7	1
20.1	3	219.48	1
20.15	3	257.27	1
20.2	2.3333	279.32	1
20.25	2.4667	322.94	1
20.3	3	308.69	1
20.35	3	342.02	1
20.4	3	293.07	1
20.45	3	280.31	1
20.5	3	308.24	1
20.55	3	343.75	1
20.6	3	312.46	1
20.65	3	320.88	1
20.7	3	301.79	1
20.75	3	343.01	1
20.8	3	336.76	1
20.85	3	311.92	1
20.9	3	344.61	1
20.95	1.9333	328.87	0
21	1.2667	313.42	0
21.05	0.26667	309.04	0
21.1	0.66667	298.89	0
21.15	0.93333	279.71	0
21.2	0.66667	270.35	0
21.25	0.93333	258.53	0
21.3	0.8	266.73	0
21.35	0.66667	259.15	0
21.4	0.73333	266.28	0
21.45	0.4	259.9	0
21.5	0.53333	254.3	0
21.55	0.46667	243.72	0
21.6	0.6	244.12	0
21.65	0.33333	226.42	0
21.7	0.4	231.45	0
21.75	0.4	242.56	0
21.8	2	237.09
21.85	1.6667	261.33
21.9	0.066667	263.77
21.95	0.46667	268.39
22	0.6	264.66
22.05	2.7333	230.1
22.1	3	229.17
22.15	3	288.21
22.2	3	261.23
22.25	3	258.16
22.3	2.4	304.43
22.35	0.53333	343.09
22.4	0.4	332.91
22.45	0.066667	319.07
22.5	1.5333	300.31
22.55	1.4667	279.42
22.6	1.2667	265.17
22.65	0.46667	259.77
22.7	2.7333	234.83
22.75	3	207.77
22.8	3	257.14
22.85	3	262.54
22.9	3	285.65
22.95	3	272.96
23	3	283.8
23.05	3	296.8
23.1	3	356.89
23.15	3	316.66
23.2	3	314.17
23.25	3	312.17
23.3	2.9333	290.08
23.35	0.93333	299.39
23.4	0.33333	268.88
23.45	0.13333	265.45
23.5	2.2667	287.19
23.55	0	306.87
23.6	1.1333	280.12
23.65	1.1333	254.2
23.7	0.4	249.91
23.75	1.4	243.33
23.8	0.4	248.49
23.85	1.2	239.75
23.9	1.6	231.46
23.95	0.73333	225.04	0
24	1.2667	223.15	0
24.05	0.2	227.57	0
24.1	0.2	224.63	0
24.15	0.2	218.34	0
24.2	0.8	235.47	0
24.25	0.26667	241.58	0
24.3	0	234.72	0
24.35	0.26667	227	0
24.4	0.46667	237.33	0
24.45	0.066667	230.78	0
24.5	1.1333	222.24	0
24.55	0.4	218.4	1
24.6	2.3333	203.24	1
24.65	3	199.17	1
24.7	3	229.32	1
24.75	3	244.35	1
24.8	3	329.23	1
24.85	3	319.76	1
24.9	3	276.43	1
24.95	3	307.78	1
25	3	292.76	1
25.05	3	298.29	1
25.1	3	280.98	1
25.15	1.7333	302.29	1
25.2	1.4	287.02
25.25	1.9333	285.62
25.3	0.33333	279.44
25.35	1.1333	263.66
25.4	1.2667	253.46
25.45	0.26667	244.12
25.5	0.066667	239.88
25.55	0.66667	234.12
25.6	1.4	231.21
25.65	0.86667	217.6
25.7	2	212.14
25.75	2.4667	209.4
25.8	0.26667	237.93
25.85	0.53333	241.09
25.9	0.66667	238.11
25.95	0.066667	239.64
26	1.5333	217.24
26.05	1.3333	208.64	0
26.1	0.4	208.59	0
26.15	1.0667	206.88	0
26.2	0.66667	202.59	0
26.25	1.0667	208.61	0
26.3	0.53333	218.43	0
26.35	0.46667	204.09	1
26.4	1.5333	191.16	1
26.45	3	194.4	1
26.5	3	195.69	1
26.55	3	214.22	1
26.6	3	238.28	1
26.65	3	262.1	1
26.7	3	252.64	1
26.75	3	231.77	1
26.8	3	234.03	1
26.85	2.3333	251.45	1
26.9	2.8667	228.25	1
26.95	0.73333	241.83
27	0	230.2
27.05	2.4	215.65
27.1	0.46667	234.53
27.15	0	226.84
27.2	0	218.73
27.25	0.066667	213.55
27.3	1.8	208.04
27.35	0.6	210.3
27.4	0.066667	203.08
27.45	0.13333	200.3
27.5	0	194.7
27.55	1.3333	198.36
27.6	1.6	198.36	1
27.65	3	187.63	1
27.7	3	201	1
27.75	3	227.54	1
27.8	3	236.78	1
27.85	3	242.24	1
27.9	3	255.4	1
27.95	3	230.17	1
28	2.6	232.08	0
28.05	0.6	238.53	0
28.1	0.26667	218.43	0
28.15	1	221.03	0
28.2	0.6	220.94	0
28.25	0.53333	214.61	0
28.3	0.2	208.18	0
28.35	0.2	199.27	0
28.4	1.4	195.34	0
28.45	0.4	204.16	0
28.5	0	202.67	0
28.55	0.066667	197.09	0
28.6	0.066667	194.31	0
28.65	0.6	191.44	0
28.7	0.33333	183.79	0
28.75	1.7333	172.95
28.8	0.46667	172.66
28.85	0	175.48
28.9	0.13333	176.19
28.95	0.13333	170.96
29	0.2	175.92
29.05	0.066667	178.05
29.1	2.2	175.54
29.15	2.2667	187.91
29.2	0.2	196.44
29.25	0	196.29
29.3	0.13333	191.26
29.35	0.46667	196.55
29.4	0.13333	193.68
29.45	0.4	190.55
29.5	2	183.81
29.55	0.13333	183.3
29.6	0	183.72
29.65	0.26667	180.01
29.7	0	175.27
29.75	0.6	175.62
29.8	2.5333	173.42	1
29.85	3	173.09	1
29.9	3	178.64	1
29.95	2.9333	193.22	1
30	2.8667	206.86	1
30.05	3	206.79	1
30.1	3	202.24	1
30.15	3	205.97	1
30.2	3	196.88	1
30.25	1.8	198.21	0
30.3	0.13333	201.76	0
30.35	0.066667	191.07	0
30.4	0.066667	187.27	0
30.45	0.2	179.27	0
30.5	0.2	178.36	0
30.55	0.33333	175.42	0
30.6	0	172.97	0
30.65	0	173.57	0
30.7	1.8667	163.68
30.75	0.73333	165.73
30.8	0.26667	167.61
30.85	0.066667	166.39
30.9	0.53333	163.88
30.95	0.13333	159.92
31	1.2	163.78
31.05	0.66667	169.67
31.1	0.53333	170.2
31.15	1	163.47
31.2	0	165.27
31.25	0.53333	169.26
31.3	0.4	165.49
31.35	0.2	161.79
31.4	0	166.82
31.45	2.4	159.12
31.5	0.2	164.55
31.55	0.4	168.17
31.6	0.33333	164.39
31.65	0.4	165.05
31.7	0.4	158.23
31.75	0.13333	163.11
31.8	1.0667	164.27
31.85	0.73333	171.51
31.9	0.066667	177.4
31.95	0.066667	172.42
32	0.13333	172.35
32.05	0.73333	172.06
32.1	0.26667	170.64
32.15	0.86667	167.1
32.2	3	167.83
32.25	3	167.3
32.3	3	173.3
32.35	0.73333	192.67
32.4	0.2	191.65
32.45	0	183.69
32.5	0.2	178.98
32.55	1.2	176.33
32.6	0	171.26
32.65	2.4667	167.06
32.7	0.6	173.33
32.75	0	174.57
32.8	0.2	171.88
32.85	0.46667	172.92
32.9	1.3333	163.68
32.95	3	156.81	1
33	3	184.12	1
33.05	3	173.25	1
33.1	3	180.54	1
33.15	3	200.34	1
33.2	3	177.36	1
33.25	3	191.38	1
33.3	3	177.86	1
33.35	2.8667	186.93	0
33.4	1.0667	194.1	0
33.45	0.2	195.59	0
33.5	0.066667	182.23	0
33.55	0.26667	182.77	0
33.6	0	174.48	0
33.65	0.93333	170.79	0
33.7	0.13333	163.18	0
33.75	0.8	162.23	0
33.8	0.13333	162.6	0
33.85	0.066667	156.73	0
33.9	0.2	154.22	0
33.95	0.86667	152.38	0
34	0.73333	155.15	0
34.05	3	158.64	1
34.1	3	160.26	1
34.15	3	175.35	1
34.2	3	166.61	1
34.25	3	173.7	1
34.3	3	176.45	1
34.35	0.73333	186.98
34.4	0.46667	187.18
34.45	0.26667	179.51
34.5	0.4	181.74
34.55	0.4	175.13
34.6	0.46667	166.93
34.65	0.73333	159.93
34.7	3	156.33
34.75	1.8667	161.17
34.8	0.066667	165.21
34.85	0.46667	164.17
34.9	0.66667	160.61
34.95	2.2	161.5
35	3	159.72
35.05	3	155.23
35.1	3	156.83
35.15	2.6667	205.6
35.2	1.2667	213.8
35.25	0.93333	207.73
35.3	1.2667	204.38
35.35	3	198.91
35.4	1.4	192.99
35.45	0	192.42
35.5	1.2	179.44
35.55	0.86667	177.26
35.6	0.2	177.12
35.65	0.86667	173.3
35.7	0.53333	170.83
35.75	3	158.18
35.8	3	175.91
35.85	3	178.16
35.9	3	183.09
35.95	3	183.27
36	1.0667	201.15
36.05	0.2	207.75
36.1	1.5333	196.33
36.15	1.9333	196.53
36.2	0.33333	190.66
36.25	0.13333	191.19
36.3	2.1333	182.99
36.35	3	180.61
36.4	3	185.21
36.45	3	192.2
36.5	1.7333	216.89
36.55	0.2	216.11
36.6	0.8	221.87
36.65	0	216.73
36.7	0.53333	200.46
36.75	3	192.26
36.8	3	185.59
36.85	3	193.79
36.9	3	221.95
36.95	2.2667	219.65
37	0.73333	243.01
37.05	1.1333	232.61
37.1	0.6	210.76
37.15	0.86667	201.2
37.2	1.6	189.05
37.25	2.8	181.24
37.3	3	169.69
37.35	3	195.86
37.4	3	211.08
37.45	1.9333	249.59
37.5	1.5333	245.1
37.55	1.6	227.92
37.6	0.8	218.77
37.65	0.53333	213.65
37.7	1.0667	212.96
37.75	1.1333	209.18
37.8	0.66667	202.32
37.85	3	185.18	1
37.9	3	195.76	1
37.95	3	217.64	1
38	2.0667	215.18	1
38.05	2.9333	223.33	1
38.1	3	222.04	1
38.15	2.7333	240.44	0
38.2	1.2667	254.64	0
38.25	0	264.97	0
38.3	0	252.19	0
38.35	0.4	246.54	0
38.4	0.066667	235.05	0
38.45	0.13333	221.69	0
38.5	1.9333	199.58
38.55	3	195.54
38.6	3	215.67
38.65	3	210.47
38.7	2.8	232.75
38.75	1.9333	251.06
38.8	1.2667	261.06
38.85	0.73333	257.88
38.9	0.26667	250.75
38.95	2.8	223.23
39	3	205.25
39.05	3	232.9
39.1	3	239.09
39.15	2.8	209.38
39.2	2	230.71
39.25	2.0667	270.4
39.3	3	225.44
39.35	2.8	247.93
39.4	3	244.04
39.45	3	253.26
39.5	2.8	232.04
39.55	3	221.88
39.6	3	263.5
39.65	2.6	255.94
39.7	2.2	251.28
39.75	2.9333	267.81
39.8	3	258.16
39.85	2.9333	240.89
39.9	3	255.51
39.95	3	239.91
40	3	259
40.05	3	235.06
40.1	3	255.77
40.15	3	226.15
40.2	2.8667	244.15
40.25	3	250.86
40.3	3	253.26
40.35	2.6667	246.1
40.4	0.53333	268.34
40.45	0.46667	254.36
40.5	1.6	229.05
40.55	2.9333	216.62
40.6	0.8	245.25
40.65	1.2667	227.67
40.7	2.1333	217.86
40.75	0.93333	226.31
40.8	2.4667	208.48
40.85	2.8	202.37
40.9	3	222.99
40.95	3	231.06
41	3	216.81
41.05	3	234.76
41.1	1.4	266.36
41.15	3	236.14
41.2	3	256.69
41.25	3	238.45
41.3	3	230.6
41.35	3	260.87
41.4	3	249.44
41.45	3	258.42
41.5	3	248.82
41.55	3	257.64
41.6	3	262.21
41.65	3	251.72
41.7	3	240.79
41.75	0.66667	298.01
41.8	2.4667	253.16
41.85	3	256.94
41.9	0.6	267.38
41.95	0.73333	270.31
42	0.86667	265.82
42.05	0.93333	236.73
42.1	0	244.02
42.15	0.8	239.64
42.2	0.13333	240.64
42.25	1.9333	231.39
42.3	0.26667	225.5
42.35	0.066667	228.9
42.4	0.066667	222.32
42.45	1.2	219.87
42.5	0.73333	239.16
42.55	0.6	235.69
42.6	0.26667	230.62
42.65	3	217.51
42.7	1.3333	228.24	0
42.75	0.6	231.84	0
42.8	1.0667	211.84	0
42.85	0.46667	213.33	0
42.9	0	212.1	0
42.95	0.26667	202.97	0
43	1.4	224.37	0
43.05	0.13333	226.45	0
43.1	0.4	219.94	1
43.15	3	202.49	1
43.2	3	210.12	1
43.25	3	229.05	1
43.3	2.3333	313.82	1
43.35	2.4667	348.73	1
43.4	3	304.15	1
43.45	3	313.57	1
43.5	3	349.77	1
43.55	3	312.24	1
43.6	3	331.08	1
43.65	3	332.99	1
43.7	2.8667	332.45	1
43.75	3	291.16	1
43.8	1.9333	371.78	1
43.85	1.6	367.98	1
43.9	0.2	364.71
43.95	0	345.87
44	2	304.09
44.05	1	314.73
44.1	0.53333	314.62
44.15	1	290.64
44.2	0.2	258.04
44.25	0.2	236.73
44.3	1.1333	262.21
44.35	0.4	262.48
44.4	1.8	252.79
44.45	0.73333	250.23
44.5	0.8	250.18
44.55	0.73333	224.94
44.6	0.4	221.27
44.65	0.46667	228.4
44.7	2.6	211.93
44.75	1	241.46
44.8	0.26667	248.02
44.85	1.3333	252.68
44.9	0.13333	251.75
44.95	2	229.84
45	1.8	216.66
45.05	1.1333	258.54
45.1	0.53333	261.88
45.15	0.13333	252.16
45.2	0.53333	241.34
45.25	1.2	242.11
45.3	0.26667	239.71
45.35	0	236.82
45.4	2	231.38
45.45	0.73333	242.62
45.5	0.66667	231.93
45.55	0.46667	234.59
45.6	0.2	230.33
45.65	0.4	221.75
45.7	3	213.72
45.75	3	220.96
45.8	3	243.65
45.85	2.8	322.92
45.9	1.8	358.05
45.95	2.4667	299.05
46	3	255.73
46.05	2.8	309.04
46.1	3	314.93
46.15	2.3333	330.35
46.2	3	315.75
46.25	2.9333	310.02
46.3	1.0667	381.46
46.35	0.53333	347.5
46.4	1	316.34
46.45	1.6667	295.56
46.5	0.33333	289.56
46.55	1.2667	266.96
46.6	0.6	272.51
46.65	1	248.38
46.7	0.73333	246.27
46.75	0.66667	224.6
46.8	1.3333	210.71
46.85	0.2	231.91
46.9	0.4	219.77
46.95	1.4	221.5
47	0.26667	230.52
47.05	0.93333	218.14
47.1	0.8	212.63
47.15	0.46667	214.5
47.2	0.86667	208.18
47.25	0.6	205.87
47.3	1.7333	225.05
47.35	1.1333	204.8
47.4	3	194.13
47.45	3	217.69
47.5	3	259.44
47.55	3	273.77
47.6	3	282.82
47.65	3	302.3
47.7	3	300.35
47.75	3	308.25
47.8	3	304.16
47.85	2.8667	332.01
47.9	1.1333	308.67
47.95	0.2	302.63
48	1.4667	272.89
48.05	1.7333	269.27
48.1	1.1333	247.64
48.15	1.8667	238
48.2	0	245.93	0
48.25	0.066667	232.84	0
48.3	1.4	223.88	0
48.35	0.13333	222.66	0
48.4	0.33333	211.03	0
48.45	1.2667	201.32	0
48.5	0.86667	210.92	0
48.55	0	207.63	0
48.6	0.2	212.2	0
48.65	1.2	199.6	0
48.7	0.26667	184.71	0
48.75	0.93333	190.33	0
48.8	0.6	190.09	1
48.85	2.5333	186.49	1
48.9	2.6667	199.28	1
48.95	3	196.93	1
49	3	214.99	1
49.05	3	245.63	1
49.1	3	300.57	1
49.15	2.9333	284.61	1
49.2	0	320.61
49.25	0.8	289.98
49.3	2.7333	272.43
49.35	1.4667	254.78
49.4	1.1333	239.8
49.45	0	237.33
49.5	1.3333	217.13
49.55	0.4	219.11
49.6	1.6	205.02
49.65	0.6	208.95
49.7	1.5333	199.5
49.75	0.13333	195.52	0
49.8	0.066667	190.61	0
49.85	0.53333	187.3	0
49.9	1.2	183.41	0
49.95	0.33333	183.92	0
50	0	181.71	0
50.05	0.4	178.89	0
50.1	0.26667	183.11	0
50.15	0.13333	174.2	1
50.2	2.6	177.62	1
50.25	3	185.28	1
50.3	3	216.15	1
50.35	3	214.37	1
50.4	3	225.15	1
50.45	3	226.41	1
50.5	3	247.99	1
50.55	3	249.5	1
50.6	3	232.32	1
50.65	1.2	228.96
50.7	0	233.02
50.75	2.5333	211.27
50.8	0.13333	198.2
50.85	1.8	194.66
50.9	1.9333	215.71
50.95	1.2	190.5
51	0.13333	190.57
51.05	0.066667	186.17
51.1	0.13333	183.26
51.15	0.93333	171.65
51.2	0.066667	174.3
51.25	0.86667	169.21
51.3	0.4	171.23
51.35	1.2667	175.14
51.4	0.13333	174.16
51.45	0	178.71
51.5	0.53333	171.44
51.55	1.6667	167.29
51.6	0.93333	177.84
51.65	0	178.7
51.7	0.93333	177.95
51.75	0.46667	176.15
51.8	2.6667	178.3
51.85	2.1333	176.48
51.9	0	171.36
51.95	2.1333	169.72
52	0.8	167.07
52.05	0.73333	170.71
52.1	0.13333	165.36
52.15	0	158.04
52.2	1.2667	167.04
52.25	0	169.44
52.3	0.066667	172.46
52.35	0	172.24
52.4	0.066667	168.83
52.45	1.0667	167.81
52.5	0.66667	167.1
52.55	1.8	162.05
52.6	0.2	160.78
52.65	1	171.63
52.7	0.66667	179.38
52.75	1.7333	179.38
52.8	0.93333	173.49
52.85	1.6	169.98
52.9	1.2667	173.97
52.95	0.53333	177.68
53	3	177.39
53.05	3	181.08
53.1	3	190.86
53.15	3	205.54
53.2	3	210.7
53.25	3	198.96
53.3	3	191.36
53.35	3	196.16
53.4	1.4667	230.58
53.45	0.6	224.04
53.5	2.0667	208.51
53.55	0.8	198.66
53.6	0.13333	187.93
53.65	0.2	183.75
53.7	1.2	176.15
53.75	1.0667	170.61
53.8	0.13333	171.66
53.85	0.26667	165.39
53.9	0.33333	165.05
53.95	0.73333	162.54
54	2.6	161.63
54.05	0.73333	166.71
54.1	0.13333	165.8
54.15	2.0667	159.4
54.2	0.73333	155.71
54.25	0	159.09
54.3	0.26667	151.44
54.35	2.7333	160.19
54.4	0.8	159.52
54.45	0.73333	155.15
54.5	1.8667	168.23
54.55	3	162.21
54.6	0.73333	155.67
54.65	0	152.67
54.7	0.2	158.94
54.75	1	158.45
54.8	0.13333	156.89
54.85	1.9333	155
54.9	0.13333	164
54.95	1	154.68
55	0.73333	169.08
55.05	0.66667	166.57
55.1	0	161.61
55.15	0.33333	165.72
55.2	0.26667	166.68
55.25	1.3333	160.45
55.3	1.5333	160.94
55.35	0.26667	159.43	0
55.4	1.1333	161.38	0
55.45	0.26667	160.85	0
55.5	0	165.73	0
55.55	0.53333	161.31	0
55.6	0	162.4	0
55.65	1	158.42	0
55.7	0.26667	149.97	0
55.75	0.4	152.52	0
55.8	0.4	152.23	0
55.85	0.86667	155.19	0
55.9	1.0667	155.19	0
55.95	0.46667	163.78	0
56	0.33333	162.16	0
56.05	1.2	159.78	0
56.1	0.46667	160.49	0
56.15	0.33333	157.87	0
56.2	1.2	162.67	0
56.25	1.2	162.4	1
56.3	2.5333	159.77	1
56.35	3	169.53	1
56.4	3	155.46	1
56.45	3	176.52	1
56.5	3	193.46	1
56.55	3	181.28	1
56.6	3	182.34	1
56.65	3	180.67	1
56.7	3	168.8	1
56.75	3	176.51	1
56.8	2.6	170.16	0
56.85	0.8	177.38	0
56.9	0.66667	170.8	0
56.95	1.2	166.06	0
57	0.6	169.46	0
57.05	0.86667	165.17	0
57.1	0.93333	166.3	0
57.15	1.3333	159.92	0
57.2	1.6	159.77
57.25	0.86667	155.96
57.3	0.066667	158.16
57.35	1.3333	152.89
57.4	0.6	158.07
57.45	0.33333	152.96
57.5	2.0667	152.82
57.55	3	153.38
57.6	3	161.62
57.65	3	158.4
57.7	3	173.66
57.75	2.4667	178.73
57.8	0.66667	178.81
57.85	0.46667	172.97
57.9	1.7333	173.41
57.95	1.2667	173.01
58	0.53333	171.14
58.05	1.1333	162.36
58.1	1.1333	164.29
58.15	0.8	160.02
58.2	1.6667	159.51
58.25	3	161.02
58.3	3	164.66
58.35	3	174.93
58.4	3	185.3
58.45	1	200.41
58.5	0.4	196.83
58.55	1.6	188.85
58.6	0.26667	189.19
58.65	0.46667	186.54
58.7	0.8	175.47
58.75	0.53333	172.23
58.8	0.26667	177.85
58.85	0.93333	169.71
58.9	1.2	175.02
58.95	0.53333	175.46
59	2.0667	177.8
59.05	2.8667	171.02
59.1	3	178.17
59.15	2.8667	187.97
59.2	1.3333	204.08
59.25	0.8	199.23
59.3	1.4	206.14
59.35	0.73333	202.98
59.4	1.9333	195.74
59.45	1.7333	190.69
59.5	1.2667	190.89
59.55	1.8667	177.15
59.6	3	171.66
59.65	3	185.35
59.7	0.86667	205.82
59.75	1.4	206.93
59.8	2.4	200.97
59.85	0.33333	209.7
59.9	0.6	193.48
59.95	0.86667	194.54
60	2.9333	188.43
60.05	2.4	186.67
60.1	0.8	201.74
60.15	0.53333	206.49
60.2	0.4	205.89
60.25	2.2	189.91
60.3	3	177.89
60.35	3	202.04
60.4	2.3333	205.15
60.45	2.5333	249.46
60.5	1.4667	230.59
60.55	1.1333	241.34
60.6	0.86667	205.43
60.65	1.6	209.41
60.7	1.3333	222.58
60.75	1.3333	206.8
60.8	3	198.07	1
60.85	3	204.11	1
60.9	3	229.58	1
60.95	3	241.55	1
61	3	251.66	1
61.05	3	253.15	1
61.1	3	225.79	1
61.15	2.3333	241.95	0
61.2	0.66667	259.66	0
61.25	0.53333	245.19	0
61.3	1.4667	239.76	0
61.35	0.2	233.47	0
61.4	1.4667	219.63	0
61.45	0.33333	214.05	0
61.5	1.2667	209.56	0
61.55	2.0667	202.49
61.6	3	206.75
61.65	3	245.8
61.7	3	225.86
61.75	1.4	254.22
61.8	1.1333	267.17
61.85	3	232.43	1
61.9	3	228.48	1
61.95	3	199.92	1
62	3	215.43	1
62.05	3	251.03	1
62.1	3	228.72	1
62.15	3	228.89	1
62.2	3	229.96	1
62.25	3	252.44	1
62.3	3	227.44	1
62.35	3	236.46	1
62.4	3	239.37	1
62.45	3	234.59	1
62.5	3	230.68	1
62.55	3	235.77	1
62.6	3	241.54	1
62.65	3	219.23	1
62.7	3	226.9	1
62.75	3	219.14	1
62.8	3	241.98	1
62.85	3	245.51	1
62.9	3	226.16	1
62.95	3	223.44	1
63	3	222	1
63.05	3	233.51	1
63.1	3	213.3	1
63.15	3	222.61	1
63.2	3	228.19	1
63.25	3	245.03	1
63.3	3	251.63	1
63.35	3	224.99	1
63.4	3	230.45	1
63.45	3	229.63	1
63.5	3	243.82	1
63.55	3	240.13	1
63.6	3	237.51	1
63.65	3	242.66	1
63.7	3	240.46	1
63.75	3	249.59	1
63.8	3	228.08	1
63.85	3	242.1	1
63.9	3	245.19	1
63.95	3	245.39	1
64	3	240.43	1
64.05	3	226.32	1
64.1	3	227.49	1
64.15	3	267.91	1
64.2	3	244.38	1
64.25	3	225.4	1
64.3	3	249.93	1
64.35	3	284.73	1
64.4	3	253.77	1
64.45	3	251.5	0
64.5	0.4	274.39	0
64.55	0.2	271.52	0
64.6	1.0667	249.72	0
64.65	0.4	232.23	0
64.7	0.66667	223.36	0
64.75	0.26667	217.72	0
64.8	0.2	208.54	0
64.85	0.73333	207.62	0
64.9	0.86667	199.42	0
64.95	2.2	192.2	1
65	3	207.42	1
65.05	3	212.88	1
65.1	3	222.28	1
65.15	3	254.9	1
65.2	3	264.66	1
65.25	3	249.21	1
65.3	3	270.9	1
65.35	3	257.23	1
65.4	3	236.94	1
65.45	3	240.92	1
65.5	3	274.96	1
65.55	3	259.56	1
65.6	3	252.58	1
65.65	3	263.64	1
65.7	3	251.62	1
65.75	3	251.11	1
65.8	3	246.44	1
65.85	3	245.37	1
65.9	3	255.75	1
65.95	3	252.7	1
66	3	271.45	1
66.05	3	255.61	1
66.1	1.7333	255.58	1
66.15	2.5333	242.34	1
66.2	1.0667	245.91
66.25	0	240.85
66.3	0.26667	228.71
66.35	1.8	219.29
66.4	3	211.55
66.45	3	220.57
66.5	3	263.28
66.55	3	253.1
66.6	3	248.7
66.65	3	253.19
66.7	3	236.92
66.75	3	239.14
66.8	3	251.63
66.85	3	239.47
66.9	3	232.42
66.95	3	258.93
67	3	255.13
67.05	1.4	265.62
67.1	0.26667	262.2
67.15	0.73333	249.48
67.2	1.2	233.79
67.25	0.4	227.7
67.3	2	220.5	1
67.35	3	216.03	1
67.4	3	222.52	1
67.45	3	210.49	1
67.5	3	235.94	1
67.55	3	249.09	1
67.6	3	233.73	1
67.65	3	228.33	1
67.7	3	226.73	1
67.75	3	265	1
67.8	3	253.11	1
67.85	3	254.84	1
67.9	3	242.66	1
67.95	3	232.26	1
68	3	241.03	1
68.05	3	252.36	1
68.1	3	249.83	1
68.15	3	244.03	1
68.2	3	238.98	1
68.25	3	231.11	1
68.3	3	250.76	1
68.35	3	262.78	1
68.4	3	242.66	1
68.45	3	231.53	1
68.5	3	226.99	1
68.55	3	224.3	1
68.6	3	228.17	1
68.65	3	219.88	1
68.7	3	247.45	1
68.75	3	239.59	1
68.8	3	233.76	1
68.85	3	226.45	1
68.9	3	232.29	1
68.95	3	229.76	1
69	3	226.07	1
69.05	3	228.13	1
69.1	3	235.84	1
69.15	3	231.15	1
69.2	3	227.1	1
69.25	3	224.77	1
69.3	3	237.06	1
69.35	3	223.54	1
69.4	3	230.14	1
69.45	3	219.52	1
69.5	3	208.67	1
69.55	3	208.45	1
69.6	3	212.49	1
69.65	3	215	0
69.7	0.86667	211.15	0
69.75	0.4	202.51	0
69.8	0.46667	197.66	0
69.85	0.13333	194.13	0
69.9	0.2	187.24	0
69.95	1.4667	185.88	0
70	1.0667	198.14	0
70.05	0.33333	199.9	0
70.1	0.93333	191.45	0
70.15	0.53333	195.36	0
70.2	0.33333	191.69	0
70.25	0.2	191.11	0
70.3	1	189.91	0
70.35	1.8	189.4
70.4	3	184.64
70.45	3	202.71
70.5	1.4	237.46
70.55	0.33333	234.99
70.6	0.8	221.26
70.65	1.7333	201.06
70.7	3	209.7
70.75	3	216.19
70.8	3	219.07
70.85	3	216.94
70.9	3	216.85
70.95	3	212.42
71	3	222.07
71.05	3	225.38
71.1	3	220.97
71.15	3	211.42
71.2	3	207.42
71.25	3	212.57
71.3	3	217.23
71.35	3	225.72
71.4	3	219.36
71.45	3	213.56
71.5	3	213.94
71.55	3	208.69
71.6	3	201.69
71.65	3	208.91
71.7	3	206.24
71.75	2.6	203.49
71.8	0.26667	205.57
71.85	0.33333	195.02
71.9	0.066667	198.15
71.95		194.72
72
72.05	3
72.1	3
72.15	3
72.2	3
72.25	3
72.3	3
72.35	3
72.4	3
72.45	3
72.5	3
72.55	3
72.6	3
72.65	3
72.7	3
72.75	3
72.8	3
72.85	3
72.9	3
72.95	3
73	3
73.05	3
73.1	3
73.15	3
73.2	3
73.25	3
73.3	3
73.35	3
73.4	3
73.45	3
73.5	3
73.55	3
73.6	3
73.65	3
73.7	3
73.75	3
73.8	3
73.85	3
73.9	3
73.95	3
74	3
74.05	3
74.1	3
74.15	3
74.2	3
74.25	3
74.3	3
74.35	3
74.4	3
74.45	3
74.5	3
74.55	3
74.6	3
74.65	3
74.7	3
74.75	3
74.8	3
74.85	3
74.9	3
74.95	3
75	3
75.05	3
75.1	3
75.15	3
75.2	3
75.25	3
75.3	3
75.35	3
75.4	3
75.45	3
75.5	3
75.55	3
75.6	3
75.65	3
75.7	3
75.75	3
75.8	3
75.85	3
75.9	3
75.95	3
76	3
76.05	3
76.1	3
76.15	3
76.2	3
76.25	3
76.3	3
76.35	3
76.4	3
76.45	3
76.5	3
76.55	3
76.6	2.8
76.65	3
76.7	3
76.75	2.2
76.8	2.8667
76.85	3
76.9	3
76.95	3
77	2.8667
77.05	2.6667
77.1	3
77.15	3
77.2	3
77.25	3
77.3	3
77.35	2.7333
77.4	3
77.45	3
77.5	3
77.55	3
77.6	3
77.65	3
77.7	2.4667
77.75	2.8
77.8	3
77.85	3
77.9	3
77.95	3
78	3
78.05	3
78.1	3
78.15	3
78.2	1.6667	0.81271
78.25	0.66667	0.80559
78.3	0.13333	0.80836
78.35	0.86667	0.78502
78.4	0.66667	0.78392
78.45	0.13333	0.80625
78.5	1.1333	0.79096
78.55	0.53333	0.79909
78.6	0.4	0.78896
78.65	0.13333	0.78031
78.7	0.53333	0.76769
78.75	0.26667	0.75994
78.8	0.86667	0.77622
78.85	0	0.76827
78.9	0.26667	0.78871
78.95	0.46667	0.78195
79	0.26667	0.78215
79.05	0.4	0.75722
79.1	0.46667	0.77061
79.15	0.6	0.79265
79.2	1.2667	0.78897
79.25	0.33333	0.78797
79.3	0.93333	0.78319
79.35	1.9333	0.80295
79.4	3	0.7809
79.45	3	0.84265
79.5	3	0.82963
79.55	3	0.81781
79.6	3	0.80897
79.65	3	0.82256
79.7	2.2	0.8296
79.75	0.4	0.82632
79.8	0.13333	0.82333
79.85	0.13333	0.78649
79.9	0	0.7973
79.95	0.66667	0.78747
80	0.13333	0.79719
80.05	0.066667	0.7801
80.1	0	0.78049
80.15	0.2	0.79121
80.2	0.4	0.77144
80.25	0.33333	0.79864
80.3	0.33333	0.78007
80.35	0.2	0.7752
80.4	0.4	0.76953
80.45	0	0.76297
80.5	0.2	0.75293
80.55	0.53333	0.77507
80.6	0.33333	0.79134
80.65	0.2	0.79253
80.7	3	0.7952
80.75	3	0.81386
80.8	1.2667	0.8211
80.85	0.33333	0.81146
80.9	0.33333	0.80679
80.95	0.93333	0.78871
81	0	0.78711
81.05	0.26667	0.76099
81.1	0.4	0.79256
81.15	0.13333	0.77071
81.2	0.33333	0.78699
81.25	0	0.78291
81.3	0.8	0.76771
81.35	1.5333	0.77098
81.4	3	0.78169
81.45	3	0.7934
81.5	3	0.83252
81.55	3	0.8472
81.6	1.6667	0.89634
81.65	0.53333	0.85305
81.7	0.6	0.86247
81.75	1	0.85939
81.8	0.26667	0.82413
81.85	0.33333	0.81181
81.9	0.8	0.83136
81.95	0.66667	0.8534
82	0.33333	0.82569
82.05	0.53333	0.84276
82.1	0.6	0.81465
82.15	0.13333	0.80938
82.2	1.6	0.80044
82.25	0.8	0.78723
82.3	1.4	0.79794
82.35	3	0.8306
82.4	3	0.8302
82.45	3	0.86067
82.5	3	0.84647
82.55	3	0.88657
82.6	3	0.90801
82.65	3	0.88477
82.7	3	0.84852
82.75	3	0.87056
82.8	3	0.89458
82.85	1.4667	0.94342
82.9	1	0.92961
82.95	0.6	0.903
83	0.26667	0.8592
83.05	0.2	0.84271
83.1	0.13333	0.83933
83.15	0.93333	0.82701
83.2	0.4	0.78917
83.25	0.46667	0.78073
83.3	0.66667	0.79939
83.35	0.13333	0.81566
83.4	0.73333	0.81764
83.45	1.0667	0.79678
83.5	0.46667	0.82438
83.55	0.73333	0.82258
83.6	0.73333	0.79815
83.65	0.46667	0.81145
83.7	0.46667	0.83765
83.75	0.53333	0.85184
83.8	0.26667	0.88073
83.85	1	0.88479
83.9	0.2	0.87496
83.95	0.2	0.87773
84	0.53333	0.86481
84.05	1.8667	0.86868
84.1	3	0.89071
84.15	3	0.89895
84.2	3	0.83301
84.25	3	0.87242
84.3	2.2667	0.8885
84.35	2.8667	0.90736
84.4	3	0.86188
84.45	3	0.97685
84.5	3	0.96324
84.55	3	0.9117
84.6	3	0.90573
84.65	1.2	0.94256
84.7	0.53333	0.93809
84.75	0.33333	0.90055
84.8	0.86667	0.89538
84.85	1.7333	0.85486
84.9	3	0.83837
84.95	3	0.94967
85	3	0.97835
85.05	3	0.96037
85.1	3	0.92442
85.15	3	0.92333
85.2	1.2667	0.94963
85.25	0.13333	0.96948
85.3	0.2	0.95508
85.35	2.6667	0.91118
85.4	3	0.84098
85.45	3	0.88863
85.5	3	0.90798
85.55	3	0.94342
85.6	3	0.93656
85.65	3	0.93308
85.7	3	0.9156
85.75	3	0.92115
85.8	3	0.9692
85.85	2.8667	1.0143
85.9	0.33333	1.0323
85.95	0.26667	0.98328
86	0.26667	0.94743
86.05	0.6	0.9081
86.1	0.8	0.90372
86.15	0.46667	0.88346
86.2	0.4	0.86221
86.25	0.13333	0.87153
86.3	1	0.86477
86.35	0.73333	0.86516
86.4	0.93333	0.84728
86.45	2.6	0.87577
86.5	3	0.87001
86.55	3	0.91835
86.6	3	0.91825
86.65	3	0.98764
86.7	2.6	0.97661
86.75	3	1.0165
86.8	2.7333	0.98732
86.85	0.33333	1.0063
86.9	0.13333	0.99634
86.95	0.33333	0.97459
87	0.4	0.95284
87.05	0	0.93446
87.1	1.6	0.92393
87.15	0.73333	0.91707
87.2	3	0.90793
87.25	3	0.87973
87.3	3	0.97831
87.35	3	1.072
87.4	3	1.077
87.45	3	1.0407
87.5	3	0.98801
87.55	3	0.99257
87.6	3	1.0177
87.65	3	1.0056
87.7	3	0.98798
87.75	3	0.96881
87.8	3	0.95898
87.85	3	0.93832
87.9	1	1.0289
87.95	1.2	0.98934
88	1.1333	0.95438
88.05	1.5333	1.0016
88.1	0.66667	0.95943
88.15	1	0.94979
88.2	0.2	0.9475
88.25	1.1333	0.92009
88.3	0.53333	0.94341
88.35	0.26667	0.91342
88.4	1.3333	0.88204
88.45	3	0.9009
88.5	3	0.93336
88.55	3	0.94953
88.6	3	1.1317
88.65	3	1.2015
88.7	3	1.1789
88.75	3	1.0932
88.8	3	1.0814
88.85	3	1.0105
88.9	3	0.99853
88.95	3	1.001
89	3	1.0121
89.05	3	1.0958
89.1	3	1.0794
89.15	3	1.0327
89.2	3	0.95947
89.25	3	1.1162
89.3	1.9333	1.0339
89.35	0.2	1.0851
89.4	0.46667	1.0484
89.45	0.86667	1.0193
89.5	0.2	0.98673
89.55	0.53333	0.95783
89.6	3	1.0278
89.65	2.8	1.0073
89.7	0.86667	1.0372
89.75	0.066667	1.0278
89.8	0.66667	1.0012
89.85	0.26667	0.98479
89.9	0.066667	0.95926
89.95	0.26667	0.94119
90	1.2	0.90901
90.05	3	0.93075
90.1	3	1.0113
90.15	3	0.99904
90.2	3	1.0627
90.25	3	1.1419
90.3	3	1.0746
90.35	3	1.0326
90.4	3	1.104
90.45	3	1.2471
90.5	3	1.1568
90.55	1.4	1.1325
90.6	0.13333	1.1334
90.65	0.6	1.0839
90.7	0.066667	1.0511
90.75	0.73333	1.0412
90.8	0.86667	1.0182
90.85	0.53333	0.99874
90.9	0.8	1.0371
90.95	1.0667	1.0356
91	0.93333	1.0295
91.05	0.2	1.0169
91.1	0.6	0.99722
91.15	0.73333	0.97407
91.2	3	0.93574
91.25	3	0.97942
91.3	3	1.0855
91.35	3	0.96233
91.4	3	1.1044
91.45	3	1.2368
91.5	3	1.1822
91.55	3	1.2248
91.6	3	1.1198
91.65	2.6667	1.1483
91.7	0.8	1.2861
91.75	0.86667	1.1981
91.8	0.4	1.1459
91.85	0.8	1.1083
91.9	0.73333	1.0626
91.95	0.4	1.0372
92	0.2	1.0254
92.05	2.1333	0.99757
92.1	3	1.083
92.15	3	1.0707
92.2	3	1.1767
92.25	3	1.1447
92.3	3	1.1212
92.35	3	1.2573
92.4	3	1.2076
92.45	3	1.1387
92.5	3	1.0794
92.55	3	1.2533
92.6	2.3333	1.1474
92.65	3	1.0706
92.7	3	1.087
92.75	3	1.0413
92.8	3	1.0298
92.85	0.86667	1.1904
92.9	1	1.1729
92.95	2.7333	1.0898
93	3	1.0484
93.05	3	1.1606
93.1	3	1.1658
93.15	3	1.1182
93.2	3	1.152
93.25	3	1.133
93.3	3	1.102
93.35	3	1.0769
93.4	3	1.1012
93.45	3	1.0769
93.5	3	1.0361
93.55	3	1.1129
93.6	3	1.0655
93.65	3	1.1061
93.7	3	1.0466
93.75	3	1.0492
93.8	3	1.0018
93.85	3	1.014
93.9	3	1.0249
93.95	3	1.0609
94	3	1.0429
94.05	3	1.0708
94.1	3	1.0565
94.15	3	0.99687
94.2	3	1.0435
94.25	3	1.0255
94.3	3	1.0471
94.35	3	1.0811
94.4	3	1.0353
94.45	2.4	1.0773
94.5	0.33333	1.0625
94.55	0.33333	1.0354
94.6	0.26667	1.0314
94.65	0.2	0.99828
94.7	0.2	0.98586
94.75	1	0.95527
94.8	2.0667	0.98158
94.85	0.53333	1.0043
94.9	0.46667	1.0164
94.95	0.8	0.95932
95	0.46667	0.96219
95.05	1.1333	0.99286
95.1	0.73333	1.0216
95.15	0.66667	1.0099
95.2	0.26667	1.0036
95.25	0.86667	0.99095
95.3	3	0.92938
95.35	3	0.95787
95.4	3	1.1147
95.45	3	1.1277
95.5	3	1.1302
95.55	3	1.2369
95.6	3	1.2452
95.65	3	1.1652
95.7	3	1.1175
95.75	3	1.1458
95.8	3	1.1079
95.85	3	1.1335
95.9	3	1.0531
95.95	3	1.0021
96	3	1.1958
96.05	3	1.0919
96.1	3	1.0661
96.15	2.4667	1.184
96.2	0.53333	1.1722
96.25	0.6	1.1066
96.3	1.4	1.0755
96.35	1.9333	1.0026
96.4	1.8	1.0099
96.45	0.26667	0.99474
96.5	0.66667	0.98868
96.55	0.26667	1.0064
96.6	0.66667	0.98161
96.65	0.6	0.96204
96.7	0.2	0.98865
96.75	0.66667	0.9947
96.8	0.4	0.99995
96.85	1	0.97274
96.9	0.2	0.95774
96.95	0.26667	0.96478
97	0.46667	0.97788
97.05	0.93333	0.99882
97.1	1.6	1.0303
97.15	0.46667	1.043
97.2	1.1333	1.0541
97.25	0.2	1.0417
97.3	1.2	1.078
97.35	0.33333	1.0769
97.4	0.73333	1.0586
97.45	0.33333	1.061
97.5	1.4	1.0112
97.55	3	0.96261
97.6	3	0.92864
97.65	3	1.0009
97.7	2.8	1.1484
97.75	3	1.0577
97.8	3	1.2256
97.85	3	1.172
97.9	3	1.1508
97.95	3	1.1175
98	3	1.0835
98.05	2.5333	1.1278
98.1	2.8	1.1062
98.15	2.7333	1.1062
98.2	0.53333	1.1132
98.25	0	1.0752
98.3	2.9333	1.0792
98.35	2.3333	1.0953
98.4	0.53333	1.1473
98.45	0.33333	1.142
98.5	0.13333	1.0488
98.55	0	1.044
98.6	0.13333	1.0252
98.65	0.66667	1.0089
98.7	0.6	0.95668
98.75	0.66667	0.97891
98.8	0.33333	0.95289
98.85	1.1333	0.93531
98.9	1.5333	0.978
98.95	0.26667	0.9073
99	1.5333	1.0054
99.05	0.73333	1.0479
99.1	0	1.0171
99.15	0.26667	1.0202
99.2	0.4	1.011
99.25	0.066667	1.0049
99.3	0.33333	0.99134
99.35	0.86667	0.97019
99.4	0.6	0.99242
99.45	0.33333	1.0246
99.5	0.73333	1.0137
99.55	0.4	1.0093
99.6	0.66667	1.0241
99.65	1.3333	1.0591
99.7	0.53333	1.0187
99.75	0.93333	1.0447
99.8	2.3333	0.99474
99.85	3	1.0538
99.9	3	0.99513
99.95	3	1.0227
100	3	1.1569
100.05	3	1.1313
100.1	3	1.1345
100.15	3	1.1073
100.2	3	1.1892
100.25	3	1.0997
100.3	2.5333	1.0791
100.35	0.6	1.1236
100.4	0.066667	1.1282
100.45	0.4	1.0673
100.5	0	1.0198
100.55	0.53333	1.0065
100.6	0.2	0.97487
100.65	0.26667	0.96751
100.7	0.33333	0.93444
100.75	0.33333	0.92868
100.8	0.93333	0.94237
100.85	1.2	0.93531
100.9	1.5333	0.97135
100.95	0.66667	0.99835
101	0.46667	1.0143
101.05	0.86667	1.0011
101.1	0.46667	1.035
101.15	0.2	1.01
101.2	0.6	0.98372
101.25	0.33333	0.99086
101.3	0.8	0.9699
101.35	2.2667	0.96552
101.4	3	0.98518
101.45	3	0.94535
101.5	3	1.0487
101.55	3	1.1488
101.6	3	1.1064
101.65	3	1.0395
101.7	3	1.1718
101.75	3	0.99823
101.8	3	1.0248
101.85	2	1.1461
101.9	0.93333	1.1577
101.95	1.6	1.1203
102	0.26667	1.0862
102.05	0.33333	1.0118
102.1	0.13333	0.97177
102.15	0.4	0.94158
102.2	0.53333	0.92926
102.25	0.53333	0.91922
102.3	0.2	0.9069
102.35	1.6667	0.91245
102.4	3	0.89855
102.45	3	0.95394
102.5	3	0.91442
102.55	2.7333	0.98501
102.6	0.6	1.0085
102.65	0.26667	0.99641
102.7	0.33333	0.97555
102.75	0.46667	0.9395
102.8	0.6	0.93999
102.85	1.5333	0.95726
102.9	0.2	0.94027
102.95	1.6	0.90194
103	0.46667	0.92219
103.05	1.1333	0.90222
103.1	1.1333	0.89626
103.15	0.86667	0.87709
103.2	1.0667	0.8746
103.25	1.0667	0.89485
103.3	0.26667	0.86873
103.35	0.6	0.91757
103.4	0.46667	0.88758
103.45	0.13333	0.91517
103.5	0.86667	0.90424
103.55	0.6	0.909
103.6	0.46667	0.89797
103.65	0.46667	0.90998
103.7	1.7333	0.90163
103.75	3	0.85774
103.8	3	0.94203
103.85	3	0.99246
103.9	1.6667	1.0461
103.95	0.26667	1.0104
104	1.5333	1.0072
104.05	1.2667	0.93871
104.1	0.66667	0.94963
104.15	1.1333	0.91288
104.2	0.53333	0.90464
104.25	0.53333	0.8952
104.3	1.4	0.85289
104.35	1.6667	0.90769
104.4	1.8	0.89458
104.45	1.3333	0.90529
104.5	1.3333	0.89655
104.55	0.93333	0.88433
104.6	1.8667	0.91282
104.65	0.66667	0.92314
104.7	1	0.94061
104.75	0.4	0.93395
104.8	3	0.87992
104.85	3	0.8688
104.9	3	0.84615
104.95	3	0.86054
105	3	0.92249
105.05	3	1.0078
105.1	3	0.93697
105.15	3	0.99703
105.2	3	0.92226
105.25	3	0.91441
105.3	3	0.89633
105.35	3	0.86197
105.4	3	0.91062
105.45	3	0.88191
105.5	3	0.85559
105.55	3	0.89838
105.6	3	0.86243
105.65	3	0.88466
105.7	3	0.88823
105.75	3	0.88594
105.8	3	0.87779
105.85	1.7333	0.89685
105.9	0.46667	0.92275
105.95	0.6	0.88144
106	0.13333	0.87508
106.05	0.2	0.8438
106.1	0.86667	0.83426
106.15	1.2667	0.81767
106.2	0.26667	0.82551
106.25	0.53333	0.7973
106.3	0.8	0.80404
106.35	1.8	0.8378
106.4	0.4	0.8357
106.45	0.46667	0.85516
106.5	1.0667	0.85207
106.55	1.0667	0.84799
106.6	3	0.85027
106.65	3	0.80538
106.7	3	0.82394
106.75	2.8667	0.86306
106.8	1.6667	0.91865
106.85	3	0.90067
106.9	3	0.86452
106.95	3	0.8672
107	0.86667	0.87573
107.05	0.4	0.86182
107.1	0.86667	0.84771
107.15	3	0.82
107.2	3	0.84432
107.25	0.93333	0.85534
107.3	0.66667	0.86665
107.35	0.73333	0.86763
107.4	0.8	0.84737
107.45	0.4	0.86414
107.5	1.8	0.84239
107.55	3	0.87654
107.6	3	0.85548
107.65	3	0.86213
107.7	3	0.94404
107.75	3	0.93976
107.8	3	0.95494
107.85	1.0667	0.92465
107.9	0.53333	0.9316
107.95	1.6667	0.90101
108	0.53333	0.89216
108.05	0.46667	0.89791
108.1	1.1333	0.86613
108.15	0.13333	0.85957
108.2	1.6667	0.85708
108.25	3	0.89987
108.3	3	0.90959
108.35	3	0.94662
108.4	2.7333	0.93708
108.45	3	0.97183
108.5	1	0.97083
108.55	0.13333	0.98174
108.6	1.8667	0.98134
108.65	0.93333	0.96574
108.7	1	0.93714
108.75	0.6	0.93157
108.8	3	0.89095
108.85	3	0.87675
108.9	3	0.91288
108.95	3	1.0686
109	1.9333	1.1226
109.05	2.6	1.0179
109.1	3	0.96319
109.15	3	0.90053
109.2	3	0.96139
109.25	2.2	1.0301
109.3	2	1.0515
109.35	1.6667	1.0531
109.4	1.4	0.9973
109.45	3	0.94894
109.5	3	0.91011
109.55	3	0.92361
109.6	3	0.97394
109.65	3	0.96748
109.7	2.2667	1.0398
109.75	1	1.0603
109.8	0.46667	1.005
109.85	2.4667	0.96517
109.9	3	0.96724
109.95	3	0.99126
110	3	1.0193
110.05	3	1.0284
110.1	3	0.9832
110.15	0.53333	1.0709
110.2	0.86667	1.0471
110.25	0.4	1.0659
110.3	0.93333	0.99538
110.35	3	0.97085
110.4	3	0.93341
110.45	3	0.95972
110.5	3	1.0504
110.55	2.2	1.0894
110.6	0.6	1.1183
110.65	0.66667	1.0948
110.7	1.3333	1.0085
110.75	3	0.97437
110.8	3	1.0074
110.85	3	1.0256
110.9	3	1.0683
110.95	3	1.0743
111	3	1.0978
111.05	1.9333	1.2162
111.1	0.13333	1.1929
111.15	0.4	1.1194
111.2	1.4	1.0919
111.25	0.6	1.0541
111.3	1.0667	1.0174
111.35	3	1.0103
111.4	3	0.99562
111.45	3	1.085
111.5	3	1.0906
111.55	3	1.0373
111.6	3	1.0691
111.65	2.7333	1.208
111.7	0.2	1.2824
111.75	0.13333	1.1846
111.8	1.1333	1.1325
111.85	1.5333	1.0927
111.9	3	1.0379
111.95	3	0.97628
[truncated: 161 more rows]

## Sheet: peripheral_3MP53
Time [hrs]	Waking [min/3min]	Bioluminescence	Wake bouts (='1') and sleep bouts (='0')
12.05
12.1
12.15
12.2
12.25
12.3
12.35
12.4
12.45
12.5
12.55
12.6
12.65
12.7
12.75
12.8
12.85
12.9
12.95
13
13.05
13.1
13.15		214.99
13.2	3	213.37
13.25	3	227.76
13.3	3	229.69
13.35	3	250.16
13.4	3	236.51
13.45	3	218.95
13.5	3	221.14
13.55	3	228.95
13.6	0.86667	226.92
13.65	0.066667	230.4
13.7	1.6	225.21
13.75	2.7333	214.71
13.8	2.5333	192.59
13.85	3	207.23
13.9	1.4667	212.71
13.95	0.26667	204.67
14	0.2	219.47
14.05	0.8	210.23
14.1	0.2	213.11
14.15	0.93333	199.44
14.2	3	197.63
14.25	3	214.8
14.3	3	200.92
14.35	2.6667	201
14.4	3	205.01
14.45	3	218.71
14.5	1.6	212.08
14.55	0.73333	211.27
14.6	2.8	200.77
14.65	3	193.21
14.7	3	191.6
14.75	3	205.84
14.8	3	205.32
14.85	1.9333	211.64
14.9	0.066667	209.87
14.95	0.26667	215.22
15	0.2	198.68
15.05	0.33333	207.25
15.1	0.8	193.66
15.15	3	194.87
15.2	3	204.24
15.25	3	204.12
15.3	3	229.31
15.35	3	222.66
15.4	2.5333	226.11
15.45	0.53333	244.55
15.5	0.33333	241.96
15.55	0.66667	240.2
15.6	0.6	228.28
15.65	2.8	235.22
15.7	0.066667	231.44
15.75	0.26667	221.54
15.8	0.53333	231.62
15.85	0.93333	225.01
15.9	0.66667	214.55
15.95	2.4	204.57
16	3	197.6
16.05	3	211.66
16.1	3	223.76
16.15	3	218.75
16.2	2.5333	231.54
16.25	3	239.11
16.3	1.2	245.86
16.35	0.6	231.29
16.4	1.0667	225.35
16.45	1	218.94
16.5	3	213.49
16.55	3	211.83
16.6	3	226.91
16.65	0.8	221.1
16.7	0.46667	238.94
16.75	2.4	219.66
16.8	3	222.43
16.85	3	203.51
16.9	3	223.7
16.95	2.8	233.73
17	0.33333	240.59
17.05	0.46667	235.65
17.1	2.5333	219.95	1
17.15	3	222.72	1
17.2	3	219.49	1
17.25	3	228.74	1
17.3	3	223.62	1
17.35	3	228.82	1
17.4	3	244.96	1
17.45	3	236.77	1
17.5	3	228.19	1
17.55	3	250.24	1
17.6	2.7333	246.32	1
17.65	2.0667	233.8	1
17.7	3	256.22	1
17.75	3	262.87	1
17.8	2.4667	246.64	1
17.85	3	238.34	1
17.9	3	263.91	1
17.95	3	244.81	1
18	3	254.96	1
18.05	3	270.24	1
18.1	3	252.21	1
18.15	2.6	258.07	0
18.2	1.4	257.26	0
18.25	0.26667	252.85	0
18.3	0.066667	240.64	0
18.35	0.6	227.81	0
18.4	0.4	203.84	0
18.45	0.13333	218.63	0
18.5	0.13333	215.33	0
18.55	0	215.43	0
18.6	2.1333	201.05
18.65	1	197.77
18.7	0.13333	210.07
18.75	1.7333	210.02
18.8	3	224.43
18.85	3	218.93
18.9	3	225.48
18.95	2.6667	230.25
19	2.7333	215.84
19.05	3	200.54
19.1	3	230.46
19.15	3	237.28
19.2	2.2	242.94
19.25	2.6	238.33
19.3	2.0667	210.58
19.35	0.66667	219.68
19.4	1.8667	231.23
19.45	3	230.67
19.5	3	230.88
19.55	3	235.89
19.6	3	205.39
19.65	3	209.36
19.7	3	206.04
19.75	3	201.43
19.8	3	230.6
19.85	3	233.46
19.9	3	236.05
19.95	3	240.42
20	3	238.72
20.05	2.8667	240.89
20.1	3	271.99
20.15	2.6667	251.62
20.2	3	258.95
20.25	1.8	288.36
20.3	0.33333	278.06
20.35	0.73333	282.41
20.4	0	262.84
20.45	0	239.3
20.5	1.2	215.74
20.55	3	213.24	1
20.6	3	218.36	1
20.65	3	221.93	1
20.7	3	229.19	1
20.75	3	219.02	1
20.8	3	232.59	1
20.85	3	236.56	1
20.9	3	214.95	1
20.95	3	227.41	1
21	3	219.4	1
21.05	3	232.46	1
21.1	3	217.73	1
21.15	3	225.1	1
21.2	3	245.54	0
21.25	1.2	246.93	0
21.3	0.26667	230.25	0
21.35	0.13333	237.89	0
21.4	0.066667	232.74	0
21.45	0.8	233.54	0
21.5	0.13333	240.06	0
21.55	0.066667	229.43	0
21.6	0.26667	240.42	0
21.65	0.13333	239.94	0
21.7	0.4	241.64	0
21.75	0.13333	211.61	0
21.8	2.3333	212.29
21.85	3	218.28
21.9	3	223.12
21.95	3	238.93
22	2.6667	239.48
22.05	0.26667	249.18	0
22.1	0.2	250.52	0
22.15	0.066667	250.05	0
22.2	1.1333	245.17	0
22.25	0	245.5	0
22.3	0.66667	235.78	0
22.35	0	235.01	0
22.4	0.2	222.51	1
22.45	2.8667	211.04	1
22.5	3	202.07	1
22.55	3	229.82	1
22.6	3	248.72	1
22.65	3	223.87	1
22.7	3	235.15	1
22.75	3	243.65	1
22.8	3	247.66	1
22.85	3	246.96	1
22.9	3	239.66	1
22.95	3	249.28	1
23	3	241.56	0
23.05	1.3333	253.95	0
23.1	1	271.78	0
23.15	0.6	260.02	0
23.2	0.6	242.9	0
23.25	1.1333	245.31	0
23.3	0.46667	245.12	0
23.35	0.8	251.67	0
23.4	0.066667	232.55	0
23.45	2.1333	226.34
23.5	2.7333	232.51
23.55	0.93333	211.48	0
23.6	0.4	204.2	0
23.65	0.66667	216.3	0
23.7	0.73333	204	0
23.75	0.4	219.86	0
23.8	0.8	216.58	0
23.85	0.4	221.75	0
23.9	0	213.37	0
23.95	0	202	0
24	0.6	214.61	0
24.05	0.53333	218.45	0
24.1	0	218.62	0
24.15	0.26667	216.07	0
24.2	0.33333	215.53	0
24.25	0.73333	208.97	0
24.3	0.46667	204.58	1
24.35	3	207.77	1
24.4	3	226.27	1
24.45	3	245.86	1
24.5	3	238.25	1
24.55	3	228.53	1
24.6	3	243.77	1
24.65	3	232.42	1
24.7	2.2667	247.19	1
24.75	3	249.65	1
24.8	3	244.84	1
24.85	2.2667	241.79	0
24.9	0.2	230.84	0
24.95	0.33333	226.95	0
25	0.066667	226.09	0
25.05	0	211.37	0
25.1	0.46667	212.25	0
25.15	0	207.06	0
25.2	0.6	209.12	0
25.25	0.6	210.31	0
25.3	1.2667	222.53	0
25.35	0.33333	208.69	0
25.4	1	227.35	0
25.45	0.73333	201.5	0
25.5	2.4667	208.49	1
25.55	3	200.97	1
25.6	3	213.56	1
25.65	2.7333	205.88	1
25.7	3	227.45	1
25.75	3	227.02	1
25.8	3	218.5	1
25.85	2.5333	237.44	1
25.9	1.8	236.57	0
25.95	0.26667	229.98	0
26	0.46667	219.22	0
26.05	0.33333	216.9	0
26.1	0.2	208.91	0
26.15	0.2	209.1	0
26.2	0.13333	201.98	0
26.25	0.2	197.06	0
26.3	0.46667	198.09	0
26.35	0.26667	200.04	0
26.4	0.33333	198.01	0
26.45	0.6	197.91	0
26.5	0.66667	197.1	0
26.55	0.066667	204.58	0
26.6	0.33333	208.61	0
26.65	0.13333	195.94	0
26.7	0.26667	181.97	0
26.75	3	190.08	1
26.8	3	194.69	1
26.85	3	178.57	1
26.9	3	189.67	1
26.95	2.9333	213.59	1
27	2.9333	200.94	1
27.05	2.5333	207.24	1
27.1	2.1333	200.83	1
27.15	2.9333	197.98	1
27.2	3	204.84	0
27.25	0.53333	207.8	0
27.3	0.066667	205.24	0
27.35	0	192.94	0
27.4	0.66667	191.62	0
27.45	0	192.97	0
27.5	0.066667	192.51	0
27.55	0.26667	195.41	0
27.6	0	192.81	0
27.65	1.2667	190.93	0
27.7	0	183.99	0
27.75	0.33333	185.53	0
27.8	0.4	196.59	0
27.85	0.66667	191.89	0
27.9	0.066667	187.75	0
27.95	0.13333	195.9	0
28	0	194.71	0
28.05	0	183.05	0
28.1	0.33333	183.64	0
28.15	0.13333	187.17	0
28.2	0	186.78	0
28.25	0	185.04	0
28.3	0.33333	185.3	0
28.35	0.6	188.42	0
28.4	0.6	177.14	0
28.45	3	180.4	1
28.5	3	176.01	1
28.55	3	197.54	1
28.6	3	193.37	1
28.65	3	198.68	1
28.7	3	183.44	1
28.75	3	185.06	1
28.8	3	195.96	1
28.85	3	210.26	0
28.9	1.2	208.36	0
28.95	0.26667	199.95	0
29	0.2	192.08	0
29.05	0.33333	184.91	0
29.1	0.73333	190.28	0
29.15	0.53333	177.8	0
29.2	0.066667	178.68	0
29.25	0.13333	180.61	0
29.3	0.4	181.66	0
29.35	0	181.59	0
29.4	0.26667	175.96	0
29.45	0.33333	176.84	0
29.5	0	176.36	0
29.55	1.1333	169.22	0
29.6	0.066667	175.85	0
29.65	0.066667	172.15	0
29.7	0	176.41	0
29.75	0.33333	170.98	0
29.8	0.066667	176.93	0
29.85	0.33333	182.45	0
29.9	0.33333	173.4	0
29.95	0.4	176.61	0
30	0.53333	168.76	0
30.05	2.5333	163.28	1
30.1	3	163.07	1
30.15	3	169.48	1
30.2	3	174.56	1
30.25	3	179.24	1
30.3	3	182.08	1
30.35	1.8	191.13	0
30.4	0.13333	186.88	0
30.45	0.26667	186.83	0
30.5	0.33333	184.6	0
30.55	0.8	177.85	0
30.6	0.2	173.78	0
30.65	0.2	174.37	0
30.7	0.93333	166.11	0
30.75	2.1333	175.08
30.8	0	176.05	0
30.85	0	171.84	0
30.9	0	171.01	0
30.95	0	168.87	0
31	0.26667	167.66	0
31.05	0.4	173.09	0
31.1	0.13333	171.02	0
31.15	0.6	170.41	0
31.2	0.6	178.51	0
31.25	0.46667	174.14	0
31.3	0.066667	168.71	0
31.35	1.4	170.15	0
31.4	0.66667	169.98	1
31.45	3	175.86	1
31.5	3	165.12	1
31.55	3	153.64	1
31.6	3	170.9	1
31.65	3	173.47	1
31.7	3	174.99	1
31.75	3	169.05	1
31.8	3	179.77	1
31.85	2.2	183.34	0
31.9	0.066667	175.8	0
31.95	0.4	174.9	0
32	0.4	173.25	0
32.05	0	172.06	0
32.1	0.13333	163.16	0
32.15	0	167.02	0
32.2	0.26667	171.92	0
32.25	0.13333	171.16	0
32.3	0.8	171.04	0
32.35	0.13333	171.38	0
32.4	0	176.57	0
32.45	0.53333	167.7	0
32.5	0	172.18	0
32.55	0.6	171.88	0
32.6	0	176.71	0
32.65	0	177.64	0
32.7	0	169.94	0
32.75	0.86667	164.22	0
32.8	1.6	163.88	1
32.85	3	165.58	1
32.9	3	173.48	1
32.95	3	174.78	1
33	3	169.15	1
33.05	3	186.16	1
33.1	3	185.04	1
33.15	3	172.08	1
33.2	3	173.2	1
33.25	3	176.08	1
33.3	3	175.11	1
33.35	3	191.19	1
33.4	2.6	193.94	0
33.45	0.13333	174.6	0
33.5	0.13333	182.83	0
33.55	0.2	181	0
33.6	0.066667	179.33	0
33.65	0.066667	175.23	0
33.7	0.73333	176.33	0
33.75	0.53333	170.21	0
33.8	0.2	168.51	0
33.85	0.33333	170.97	0
33.9	0.66667	167.29	0
33.95	0.33333	169.39	0
34	0.93333	172.76	0
34.05	2.7333	173.35	1
34.1	3	171.12	1
34.15	3	163.24	1
34.2	3	170.37	1
34.25	3	192.23	1
34.3	2.8	189.02	1
34.35	0	187.45	0
34.4	0.53333	188.78	0
34.45	0.066667	177.77	0
34.5	0	178.36	0
34.55	0.6	177.17	0
34.6	0.4	172.2	0
34.65	0.73333	177.68	0
34.7	0.33333	175.21	0
34.75	0	175.78	1
34.8	1.6	173.72	1
34.85	3	185.58	1
34.9	3	175.5	1
34.95	3	177.92	1
35	3	183.95	1
35.05	3	192.01	1
35.1	2.9333	210.2	0
35.15	0.6	209.5	0
35.2	0.26667	204.29	0
35.25	0.13333	203.04	0
35.3	0.86667	200.85	0
35.35	0.13333	199.22	0
35.4	0.2	193.21	0
35.45	0.26667	189.8	0
35.5	1.6	181.64	1
35.55	3	184	1
35.6	3	177.22	1
35.65	3	187.83	1
35.7	3	195.49	1
35.75	3	197.3	1
35.8	2.4667	205.58	1
35.85	0.2	210.04
35.9	0.86667	197.81
35.95	1.0667	197.73
36	3	192.74	1
36.05	3	192.38	1
36.1	3	184.97	1
36.15	3	184.49	1
36.2	3	179.66	1
36.25	3	201.94	1
36.3	3	207.89	0
36.35	0.8	209.21	0
36.4	0.4	191.44	0
36.45	0.53333	175.61	0
36.5	0.26667	176.14	0
36.55	0.13333	187.39	0
36.6	0.46667	192.3	0
36.65	0.33333	190.06	0
36.7	1	190.08	0
36.75	1.6	193.58
36.8	3	185.86
36.85	3	189.56
36.9	3	201.26
36.95	3	223.56
37	0.8	220.04	0
37.05	0.53333	210.68	0
37.1	0.066667	207.4	0
37.15	0.8	202.68	0
37.2	0	207.76	0
37.25	0.6	205.42	0
37.3	0.6	198.74	0
37.35	1.0667	189.98	1
37.4	3	195.79	1
37.45	3	212.29	1
37.5	3	218.97	1
37.55	3	211.41	1
37.6	3	197.51	1
37.65	3	210.97	1
37.7	2.6667	222.89	1
37.75	0.53333	224.68
37.8	1.2	215.8
37.85	3	198.4
37.9	3	191.41
37.95	3	205.07
38	2.2667	233.3
38.05	0.066667	222.34
38.1	2.9333	218.77
38.15	3	214.47
38.2	3	232.46
38.25	1.3333	230.19
38.3	0.13333	221.51
38.35	1.2667	211.39
38.4	3	200.8
38.45	3	199.46
38.5	3	207.76
38.55	3	202.09
38.6	2.8	205.83
38.65	1.4667	218.58
38.7	1.6667	236.88
38.75	0.13333	221.36
38.8	1.8667	189.75
38.85	3	206.25
38.9	1.2667	197.93
38.95	1.7333	197.34
39	3	209.11
39.05	3	203.44
39.1	3	222.89
39.15	2.6	217.51
39.2	1.1333	196.25
39.25	3	207.84
39.3	1.5333	203.08
39.35	0.66667	194.65
39.4	1.8	199.59
39.45	3	210.03
39.5	3	225.55
39.55	0.86667	206.03
39.6	2.7333	230.67
39.65	1.2667	224.26
39.7	0.13333	209.34
39.75	1.1333	206.11
39.8	3	197.59
39.85	3	219.64
39.9	2.3333	228.54
39.95	0.33333	216.4
40	2.6	216.5
40.05	1	221.65
40.1	2.8667	225.62
40.15	1	227.7
40.2	0.4	216.67
40.25	0.33333	228.06
40.3	2.8	227.47
40.35	3	214.13
40.4	2.3333	215.3
40.45	0	225.75
40.5	0.6	220.79
40.55	0.2	216.71
40.6	0.46667	212.61
40.65	3	210.38
40.7	3	221.15
40.75	3	220.7
40.8	3	225.15
40.85	3	248.19
40.9	1.9333	256.4
40.95	0.8	230.75
41	2.8667	218.6
41.05	3	242.55
41.1	3	258.9
41.15	1.5333	257.6
41.2	0.53333	252.01
41.25	0	238.16
41.3	2	220.53	1
41.35	3	222.65	1
41.4	3	237.55	1
41.45	3	235.92	1
41.5	3	224.56	1
41.55	3	227.88	1
41.6	3	239.45	1
41.65	3	229.08	1
41.7	3	211.27	1
41.75	3	209.15	1
41.8	3	238.34	1
41.85	3	247.4	1
41.9	3	239.79	1
41.95	2.8	241.2	1
42	2.1333	232.11	0
42.05	0.066667	225.9	0
42.1	0.066667	235.42	0
42.15	0.26667	239.01	0
42.2	0.26667	245.54	0
42.25	0.13333	239.46	0
42.3	0.6	239.56	0
42.35	0.2	234.6	0
42.4	0.13333	224.03	0
42.45	1.5333	232.22
42.5	0	220.92
42.55	0.2	217.98
42.6	0.33333	209.17
42.65	2.8667	215.38	1
42.7	3	221.51	1
42.75	3	242.19	1
42.8	2.8667	233.93	1
42.85	3	229.79	1
42.9	3	228.58	1
42.95	3	220.15	1
43	3	229.61	1
43.05	2.8	237.53	1
43.1	3	243.1	1
43.15	2.0667	240.76	0
43.2	0.6	245.35	0
43.25	0.066667	248.16	0
43.3	0.26667	244.33	0
43.35	0.066667	223.7	0
43.4	1	235.13	0
43.45	1.0667	227.03	0
43.5	2.8667	227.38
43.55	3	216.35
43.6	3	256.81
43.65	2.7333	246.51
43.7	0.33333	243.05	0
43.75	0.13333	230.96	0
43.8	0.13333	201.77	0
43.85	0.26667	227.43	0
43.9	0.13333	221.91	0
43.95	0.13333	211.7	0
44	0.53333	217.53	1
44.05	3	201.72	1
44.1	3	223.45	1
44.15	3	232.33	1
44.2	3	230.43	1
44.25	3	238.62	1
44.3	3	247.45	1
44.35	3	243.29	1
44.4	3	229.17	1
44.45	3	245	1
44.5	3	242.39	1
44.55	2.6	261.61	0
44.6	0.53333	260.64	0
44.65	0.066667	252.97	0
44.7	0	247.4	0
44.75	0.33333	220.24	0
44.8	0.33333	234.12	0
44.85	0.33333	231.08	0
44.9	1.0667	234.47	0
44.95	0	246.02	0
45	0.2	251.32	0
45.05	0	243.98	0
45.1	0	235.59	0
45.15	0.4	210.27	0
45.2	2.7333	200.68	1
45.25	3	197.01	1
45.3	3	231.71	1
45.35	2.9333	238.86	1
45.4	3	239.07	1
45.45	3	231.22	1
45.5	3	232.69	1
45.55	3	232.8	1
45.6	3	222.94	1
45.65	3	223.16	1
45.7	3	216.81	1
45.75	3	212.11	1
45.8	3	206.35	1
45.85	3	211.41	1
45.9	3	221.38	1
45.95	3	212.59	1
46	3	219.91	1
46.05	3	221.77	1
46.1	3	225.85	0
46.15	1.1333	208.42	0
46.2	0	207.39	0
46.25	0	205.15	0
46.3	0.2	227.23	0
46.35	0.46667	217.94	0
46.4	0.93333	216.33	0
46.45	0.2	210.23	0
46.5	0.2	203.77	0
46.55	0	197.61	0
46.6	0.13333	193.76	0
46.65	0.73333	191.95	0
46.7	0	195.31	0
46.75	0.13333	190.19	0
46.8	0.066667	198.01	0
46.85	0.26667	194.86	0
46.9	0.8	196.68	0
46.95	0.73333	196.38	0
47	0	195.08	0
47.05	1.2	193.52	0
47.1	3	193.8	1
47.15	3	215.19	1
47.2	3	220.35	1
47.25	3	211.68	1
47.3	3	210.14	1
47.35	3	216.46	1
47.4	3	224.56	1
47.45	2.7333	237.33	1
47.5	3	236.19	0
47.55	1.2	226.13	0
47.6	0.66667	222.68	0
47.65	0.6	222.31	0
47.7	0.33333	210.35	0
47.75	0.93333	204.83	0
47.8	0.13333	199.06	0
47.85	0.46667	201.34	0
47.9	0.33333	198.47	0
47.95	0.73333	210.37	0
48	0	207.67	0
48.05	0.33333	199.62	0
48.1	0.46667	199.34	0
48.15	0.26667	190.15	0
48.2	0	197.01	0
48.25	0.66667	193.42	0
48.3	0.066667	190.28	0
48.35	0	193.65	0
48.4	0.2	202.51	0
48.45	0.26667	201.36	0
48.5	0.4	197.78	0
48.55	0.2	188.92	0
48.6	0.13333	195.89	0
48.65	0.86667	191.53	0
48.7	1.2667	193.18	0
48.75	0.13333	192.91	0
48.8	0.86667	189.83	0
48.85	0.86667	186.51	0
48.9	3	187.3	1
48.95	3	204.67	1
49	3	211.11	1
49.05	3	213.5	1
49.1	3	201.64	1
49.15	3	211.81	1
49.2	2.8	199.96	1
49.25	3	216.93	0
49.3	1.2	215.85	0
49.35	1.1333	222.91	0
49.4	1	217.54	0
49.45	0.8	206.8	0
49.5	0.33333	195.46	0
49.55	1.0667	197.56	0
49.6	0.13333	191.93	0
49.65	0.33333	187.29	0
49.7	0.46667	184.26	0
49.75	0.2	176.39	0
49.8	1.4667	173.4	0
49.85	0.53333	180.41	0
49.9	0.4	178.34	0
49.95	1.8	181.68
50	0	177.58
50.05	0	177.51
50.1	0.46667	176.77
50.15	0.13333	177.16
50.2	0.13333	177.46
50.25	0.86667	177.09
50.3	0.53333	173.8
50.35	0.66667	183.32
50.4	1.7333	177.78
50.45	0.46667	175.68
50.5	0.6	180.76
50.55	0.66667	173.86
50.6	0	180.98
50.65	1	188.95
50.7	0.66667	194.03
50.75	3	196.2
50.8	3	205.01
50.85	3	208.31
50.9	3	194.73
50.95	3	219.38
51	3	198.6
51.05	3	189.5
51.1	1.8667	188.27
51.15	1.2	187.79
51.2	1.1333	187.94
51.25	0.86667	185.91
51.3	0.26667	183.21
51.35	1.8667	191.73
51.4	0	180.41
51.45	0	178.74
51.5	0.26667	179.86
51.55	0.53333	178.56
51.6	0.8	176.2
51.65	0.066667	178.74
51.7	0.4	177
51.75	0.66667	180.7
51.8	0.46667	178.03
51.85	1.3333	183.64
51.9	0.066667	182.92
51.95	0.13333	189
52	0.53333	188.88
52.05	0.4	185.36
52.1	1.1333	192.41
52.15	1.3333	183.78
52.2	0.53333	183.46
52.25	0.4	180.92
52.3	0.73333	188.69
52.35	0.066667	182.08
52.4	1.4	167.98
52.45	1.9333	174.66
52.5	0.26667	172.27
52.55	0.2	176.95
52.6	0.33333	171.25
52.65	0.26667	181.62
52.7	1.2667	176.26
52.75	3	176.71
52.8	3	179.08
52.85	3	184.5
52.9	3	197.29
52.95	3	185.99
53	3	171.4
53.05	3	171.41
53.1	3	178
53.15	3	173.95
53.2	3	194.1
53.25	3	181.02
53.3	1.0667	176.81
53.35	0.86667	178.58
53.4	0.13333	171.3
53.45	2.3333	171.63
53.5	3	172.42
53.55	3	177.08
53.6	1.4667	178.91	0
53.65	1	167.39	0
53.7	0.53333	168.09	0
53.75	0.93333	164.3	0
53.8	0.4	168.16	0
53.85	0.73333	162.82	0
53.9	0.93333	160.03	0
53.95	0.13333	163.36	0
54	0.53333	162.64	0
54.05	0.4	161.63	0
54.1	0.46667	169.53	0
54.15	0.86667	164.3	1
54.2	3	164.44	1
54.25	3	166.54	1
54.3	3	164.42	1
54.35	3	169.66	1
54.4	3	171.18	1
54.45	3	169.06	1
54.5	2.1333	175.45	0
54.55	0.066667	179.2	0
54.6	0.46667	173.97	0
54.65	0.6	178.45	0
54.7	0.2	176.77	0
54.75	0	174.05	0
54.8	0.33333	174.11	0
54.85	1.4667	172.39	0
54.9	1.6	168.84
54.95	2.2667	165.41
55	0.4	168.11
55.05	0.33333	164.24
55.1	0.46667	166.12
55.15	0.66667	167.04
55.2	0.6	162.74
55.25	0.6	166.96
55.3	1.3333	168.06
55.35	3	162.27
55.4	3	169.28
55.45	2.2	169.01
55.5	0.2	168.91
55.55	2.4667	166.97
55.6	2.8667	164.91
55.65	0.6	164.93
55.7	0.4	160.27
55.75	0.26667	166.42
55.8	1	163.7
55.85	0.2	158.49
55.9	0.46667	163.59
55.95	0.93333	167.18
56	0.33333	161.9
56.05	0.66667	162.23
56.1	0.46667	161.04
56.15	2.2667	169.05
56.2	2.2667	174.05
56.25	0.53333	170.06
56.3	0.4	183.83
56.35	0.13333	169.33
56.4	3	172.41
56.45	3	170.55
56.5	3	172.68
56.55	3	187.65
56.6	3	180.75
56.65	3	175.74
56.7	3	190.44
56.75	3	186.83
56.8	3	205.67
56.85	3	198.15
56.9	1.6667	191.91
56.95	0.86667	185.99
57	0.066667	184.41
57.05	1.9333	168.51	1
57.1	3	183.99	1
57.15	3	189.36	1
57.2	3	190.75	1
57.25	3	186.12	1
57.3	3	181.93	1
57.35	1.6667	180.67	0
57.4	0	177.38	0
57.45	0	186.77	0
57.5	1	182.82	0
57.55	0	180.53	0
57.6	0	174.07	0
57.65	0.53333	177.28	0
57.7	1.7333	176.65
57.75	2.2667	177.8
57.8	3	178.06
57.85	3	178.6
57.9	3	184.08
57.95	2.7333	197.76
58	0.13333	194.04
58.05	1.3333	197.19
58.1	3	190.31	1
58.15	3	187.28	1
58.2	3	183.07	1
58.25	3	186.66	1
58.3	3	188.72	1
58.35	3	205.18	1
58.4	3	206.9	0
58.45	0.066667	199.89	0
58.5	0.46667	201.06	0
58.55	0.46667	195.78	0
58.6	0	192.33	0
58.65	0.6	190.07	0
58.7	0	192.91	0
58.75	1.2	192.3	0
58.8	0	195.54	0
58.85	0	187.64	0
58.9	0.33333	184.36	0
58.95	2.8	183.33	1
59	3	191.72	1
59.05	3	198.18	1
59.1	3	195.59	1
59.15	3	201.76	1
59.2	3	206.35	1
59.25	3	215.03	1
59.3	2.2	221.46	0
59.35	0	226.01	0
59.4	0.33333	226.76	0
59.45	0	216.35	0
59.5	1.1333	209.65	0
59.55	0.26667	200.66	0
59.6	0	196.76	0
59.65	0.2	194.49	0
59.7	1.2	197.48	0
59.75	3	191.09	1
59.8	3	190.33	1
59.85	3	198.32	1
59.9	3	203.46	1
59.95	3	198.7	1
60	3	210.33	1
60.05	0.93333	216.92
60.1	0.33333	217.23
60.15	0.2	211.62
60.2	1.3333	208.25
60.25	3	201.58
60.3	3	207.65
60.35	3	205.73
60.4	0.33333	209.24
60.45	0.46667	204.74
60.5	0.066667	204.06
60.55	3	201.54
60.6	3	203.51
60.65	3	213.23
60.7	2.6	219.29
60.75	0.13333	211.15
60.8	0.26667	235.43
60.85	0	217.84
60.9	2.1333	202.3
60.95	3	210.8
61	3	204.01
61.05	3	207.56
61.1	3	215.3
61.15	3	215.92
61.2	1.8667	220.57
61.25	1.5333	216.7
61.3	1.7333	219.56
61.35	3	216.55
61.4	3	214.29
61.45	3	223.39
61.5	2.3333	233.81
61.55	1.2	227.09
61.6	3	215.1
61.65	3	197.69
61.7	1.0667	208.04
61.75	0.73333	213.98
61.8	2.4	200.77
61.85	3	219.68
61.9	3	218.98
61.95	2.4	211.5
62	3	231.31
62.05	2.3333	231.77
62.1	0.2	225.65
62.15	3	222.13
62.2	3	224.94
62.25	2.4667	229.29
62.3	0.33333	216.15
62.35	2.8	216.16
62.4	2.8	215.11
62.45	0.53333	211.65
62.5	1.3333	215.64
62.55	1	214.99
62.6	3	208.96
62.65	3	204.73
62.7	3	227.2
62.75	1.1333	227.46
62.8	0.4	230.9
62.85	1.2667	225.04
62.9	0	249.5
62.95	1	228.25
63	0.33333	211.26
63.05	2.2	210.56
63.1	3	218.8
63.15	3	224.1
63.2	3	224.31
63.25	3	231.06
63.3	3	234.09
63.35	3	220.26
63.4	3	230.1
63.45	2.1333	233.78
63.5	0.66667	221.25
63.55	0.066667	223.4
63.6	2.8667	215.1
63.65	2.7333	212.38
63.7	0.13333	211.08
63.75	0.46667	212.45
63.8	0.46667	208.49
63.85	1.9333	200.41
63.9	3	213.94
63.95	3	220.7
64	1.9333	220.03
64.05	0.66667	215.8
64.1	0.066667	223.25
64.15	2.5333	230.76
64.2	3	239.26
64.25	3	226.83
64.3	3	208.48
64.35	3	231.67
64.4	3	229.29
64.45	3	229.48
64.5	3	233.4
64.55	1.4667	224.81
64.6	0.13333	234.92
64.65	0.93333	234.57
64.7	1.0667	213.99
64.75	3	206.98
64.8	3	206.1
64.85	3	226.02
64.9	3	226.57
64.95	1.9333	222.09
65	1.2667	204.8
65.05	3	215.72
65.1	3	227.91
65.15	3	259.19
65.2	3	274.2
65.25	2.4667	309.68
65.3	0.4	240.54
65.35	2.3333	217.84
65.4	3	228.14
65.45	1.4667	225.04
65.5	0	216.17
65.55	0.4	202.47
65.6	0.13333	213.73
65.65	3	209.34
65.7	1.0667	275.62
65.75	0.13333	276.37
65.8	1.0667	281.09
65.85	0.13333	255.41
65.9	1.0667	204.54
65.95	3	219.6
66	3	214.81
66.05	3	227.75
66.1	3	240.23
66.15	3	239.6
66.2	2.9333	233.26
66.25	0.4	226.29
66.3	0.53333	229.33
66.35	0.33333	222.19
66.4	1.2	229.67
66.45	0.4	219.88
66.5	0.86667	216.65
66.55	0.4	218.48
66.6	3	220.34
66.65	3	225.44
66.7	3	216.59
66.75	3	226.25
66.8	0.6	208.7
66.85	0.2	205.52
66.9	0.4	211.11
66.95	0.73333	212.74
67	0.66667	206.38
67.05	1.6	219.81
67.1	3	226.07
67.15	3	223.02
67.2	3	245.58
67.25	3	261.31
67.3	3	299.54
67.35	3	262.27
67.4	3	243.63
67.45	3	262.47
67.5	3	228.35
67.55	3	253.58
67.6	3	239.95
67.65	3	236.01
67.7	3	215.18
67.75	3	230.21
67.8	3	232.65
67.85	3	274.62
67.9	2.6667	288.67
67.95	0.13333	231.98
68	0.46667	214.23
68.05	0.73333	213
68.1	2	265.53
68.15	0.33333	264.49	0
68.2	0.066667	219.71	0
68.25	0.4	196.39	0
68.3	0.73333	203.07	0
68.35	0	199.39	0
68.4	0	201.78	0
68.45	0.86667	202.75	0
68.5	0.33333	198.43	0
68.55	0.4	198	0
68.6	0.73333	203.92	0
68.65	0.46667	207.11	0
68.7	0.4	200.84	0
68.75	0.6	216.67	1
68.8	2.6667	266.11	1
68.85	3	218.87	1
68.9	3	252.69	1
68.95	3	248.72	1
69	3	236.22	1
69.05	3	261.73	1
69.1	3	243.49	1
69.15	3	241.53	1
69.2	1.8667	270.48	1
69.25	2.6667	253.53	1
69.3	3	237.66	1
69.35	3	294.11	1
69.4	3	310.24	0
69.45	0.73333	294.05	0
69.5	0.33333	285.17	0
69.55	0.66667	278.61	0
69.6	0.53333	236.96	0
69.65	0.26667	206.68	0
69.7	0.13333	206.89	0
69.75	0.93333	201.19	0
69.8	0.13333	202.52	0
69.85	0.46667	202.98	0
69.9	0.73333	206.88	0
69.95	1.5333	217.69	1
70	3	250.7	1
70.05	3	236.09	1
70.1	3	263.37	1
70.15	3	219.61	1
70.2	3	236.02	1
70.25	3	207.83	1
70.3	3	213.82	1
70.35	3	314.73	1
70.4	1.6667	358.38	0
70.45	1.4	326.53	0
70.5	1.3333	351.39	0
70.55	0.93333	347.16	0
70.6	0.2	212.86	0
70.65	0.6	202.54	0
70.7	0	197.46	0
70.75	0.066667	202.47	0
70.8	0.66667	201.71	0
70.85	0.73333	215.94	0
70.9	1.2	207.22	0
70.95	0.33333	204.81	0
71	0.93333	215.45	0
71.05	0.13333	213.28	0
71.1	0.13333	212.96	0
71.15	0.4	211.04	0
71.2	0.53333	211.39	0
71.25	0.26667	207.4	0
71.3	1.4	199.24	0
71.35	0.46667	208.56	0
71.4	0.93333	218.97	0
71.45	3	238.05	1
71.5	3	237.31	1
71.55	3	230.37	1
71.6	3	223.54	1
71.65	3	241.66	1
71.7	3	301.18	1
71.75	2.1333	265.73	1
71.8	0.93333	246.7
71.85	0.93333	216.47
71.9	0.2	198.7
71.95	0.46667
72	0.86667
72.05	3
72.1	3
72.15	3
72.2	3
72.25	3
72.3	3
72.35	3
72.4	3
72.45	3
72.5	3
72.55	3
72.6	3
72.65	3
72.7	3
72.75	3
72.8	3
72.85	3
72.9	3
72.95	3
73	3
73.05	3
73.1	3
73.15	3
73.2	3
73.25	3
73.3	3
73.35	3
73.4	3
73.45	3
73.5	3
73.55	3
73.6	3
73.65	2.8
73.7	2.6667
73.75	3
73.8	3
73.85	3
73.9	3
73.95	3
74	3
74.05	3
74.1	3
74.15	3
74.2	3
74.25	3
74.3	3
74.35	3
74.4	3
74.45	3
74.5	2.0667
74.55	2.5333
74.6	3
74.65	3
74.7	3
74.75	3
74.8	3
74.85	3
74.9	3
74.95	3
75	3
75.05	3
75.1	3
75.15	3
75.2	3
75.25	3
75.3	3
75.35	3
75.4	3
75.45	3
75.5	3
75.55	3
75.6	3
75.65	2.6
75.7	3
75.75	3
75.8	2.8667
75.85	3
75.9	3
75.95	2.9333
76	3
76.05	3
76.1	3
76.15	3
76.2	1.4667
76.25	2.3333
76.3	3
76.35	3
76.4	3
76.45	2.6
76.5	3
76.55	3
76.6	3
76.65	3
76.7	3
76.75	3
76.8	3
76.85	3
76.9	2.6
76.95	2.7333
77	3
77.05	3
77.1	2.8
77.15	3
77.2	2.6667
77.25	2.8667
77.3	3
77.35	3
77.4	2.8667
77.45	2.8667
77.5	3
77.55	3
77.6	2.8
77.65	3
77.7	2.8667
77.75	3
77.8	3
77.85	2.9333
77.9	3
77.95	2.8667
78	2.6667
78.05	3
78.1	3
78.15	1.7333
78.2	0.4	0.85006
78.25	0.26667	0.85465
78.3	0.2	0.85237
78.35	0.4	0.88412
78.4	0	0.85015
78.45	0.2	0.82969
78.5	0.13333	0.8641
78.55	0.26667	0.83683
78.6	0.13333	0.8386
78.65	0.13333	0.81059
78.7	0.46667	0.83213
78.75	0	0.80837
78.8	0.066667	0.82704
78.85	0.13333	0.83476
78.9	0.66667	0.87448
78.95	0.26667	0.83881
79	0.46667	0.85982
79.05	0.46667	0.88317
79.1	0.13333	0.85527
79.15	0.53333	0.8716
79.2	0.2	0.88889
79.25	0.8	0.81239
79.3	0.2	0.82266
79.35	0.73333	0.87036
79.4	0	0.86723
79.45	0.86667	0.88207
79.5	3	0.83386
79.55	3	0.86178
79.6	3	0.88949
79.65	3	0.92655
79.7	3	0.94235
79.75	3	0.97059
79.8	1	0.87623
79.85	0.13333	0.93382
79.9	0.26667	0.85721
79.95	0	0.88949
80	0.8	0.86414
80.05	0.2	0.84102
80.1	0.13333	0.88851
80.15	0	0.89739
80.2	0.33333	0.88246
80.25	0	0.89231
80.3	0.26667	0.89311
80.35	0.53333	0.93433
80.4	0.13333	0.91514
80.45	0.46667	0.96178
80.5	0.13333	0.97151
80.55	0.26667	0.95711
80.6	0.6	0.94601
80.65	0.066667	0.93661
80.7	0.13333	0.92933
80.75	0.26667	0.96597
80.8	0.26667	0.94711
80.85	0	0.95397
80.9	0.33333	0.95478
80.95	0	0.97303
81	0.13333	0.94501
81.05	0.2	0.95667
81.1	0	0.95737
81.15	0.13333	0.95966
81.2	0.066667	0.94228
81.25	0.4	0.96627
81.3	0.93333	0.94921
81.35	0.2	0.92811
81.4	0.2	0.94604
81.45	0.2	0.98693
81.5	0.13333	0.97859
81.55	1.9333	0.97408
81.6	3	0.99094
81.65	3	0.9406
81.7	3	0.9883
81.75	3	1.1776
81.8	3	1.1201
81.85	2.5333	1.0975
81.9	1	1.1086
81.95	0.066667	1.1619
82	0.33333	1.1017
82.05	0.46667	1.0375
82.1	0.066667	0.96349
82.15	0	0.92708
82.2	0.066667	0.89088
82.25	0.53333	0.87414
82.3	0.13333	0.88164
82.35	0.2	0.87054
82.4	0.26667	0.85869
82.45	0.13333	0.83408
82.5	0.2	0.82723
82.55	0.66667	0.918
82.6	0.2	0.95326
82.65	1.1333	0.94279
82.7	3	0.89574
82.75	3	0.96056
82.8	3	1.0994
82.85	3	1.0992
82.9	3	1.1406
82.95	3	1.1459
83	3	1.1708
83.05	3	1.0929
83.1	2	1.0356
83.15	3	0.96148
83.2	3	1.0347
83.25	1.7333	1.0779
83.3	0.13333	1.1212
83.35	0.066667	1.0931
83.4	0.066667	1.0427
83.45	0.33333	1.0096
83.5	0	1.0203
83.55	0	0.95538
83.6	0	1.0022
83.65	0.46667	0.96795
83.7	0.066667	0.9797
83.75	0.066667	0.95818
83.8	0.73333	0.97387
83.85	0.13333	0.94894
83.9	0	0.97963
83.95	0.73333	0.97608
84	0.2	1.0456
84.05	0.26667	1.0172
84.1	0.73333	1.067
84.15	0.4	1.1372
84.2	0.2	1.1177
84.25	0.26667	1.0941
84.3	0.6	1.1125
84.35	0.46667	1.0728
84.4	2.3333	0.99109
84.45	3	0.99307
84.5	3	1.0955
84.55	3	1.1235
84.6	3	1.1143
84.65	3	1.1007
84.7	3	1.2439
84.75	3	1.1811
84.8	3	1.2082
84.85	1.2	1.3059
84.9	0.2	1.3189
84.95	0.8	1.1196
85	0.4	1.1008
85.05	2	1.0136
85.1	3	1.068
85.15	1.1333	1.1287
85.2	0.46667	1.0508
85.25	0.66667	0.94269
85.3	2.8667	1.0437
85.35	3	0.96621
85.4	3	1.1026
85.45	3	1.1734
85.5	1.4667	1.095
85.55	2	1.1099
85.6	1.4667	1.0961
85.65	0.4	1.0653
85.7	1.3333	1.0458
85.75	3	1.0297
85.8	3	1.0234
85.85	3	0.9714
85.9	3	0.93605
85.95	2.8667	1.0209
86	0.93333	1.0939
86.05	1.3333	1.067
86.1	3	1.0188
86.15	3	1.0057
86.2	3	1.0322
86.25	1.9333	1.1885
86.3	0.066667	1.1875
86.35	0.2	1.157
86.4	0.26667	1.1224
86.45	0.2	1.1271
86.5	0.13333	1.1051
86.55	0.46667	1.0558
86.6	1.3333	0.9838
86.65	3	0.95654
86.7	3	0.94735
86.75	3	1.016
86.8	3	1.0235
86.85	0.73333	1.1676
86.9	0.13333	1.1413
86.95	2.2	1.0992
87	3	1.0242
87.05	0.4	1.0879
87.1	0.066667	0.97325
87.15	2.2667	1.0502
87.2	0	1.1793
87.25	2.9333	1.0107
87.3	2.7333	0.99434
87.35	0.13333	0.90295
87.4	0.86667	0.94576
87.45	3	1.029
87.5	1.0667	1.0434
87.55	0.26667	1.0532
87.6	1.2667	1.0388
87.65	0.2	1.0437
87.7	1.4	1.0525
87.75	3	1.0939
87.8	3	1.0445
87.85	3	1.0926
87.9	1.5333	1.2073
87.95	0.066667	1.2146
88	2.4667	1.1268
88.05	0.86667	1.0553
88.1	0.13333	1.0765
88.15	1.7333	1.0471
88.2	0.13333	1.0033
88.25	0.86667	1.0148
88.3	3	1.0349
88.35	3	1.068
88.4	3	1.1234
88.45	3	1.123
88.5	2.7333	1.2678
88.55	0.2	1.0904
88.6	0.2	1.0701
88.65	0.13333	1.2071
88.7	0.4	1.1294
88.75	0.2	1.1613
88.8	0.066667	1.1205
88.85	1.7333	1.1025
88.9	3	1.0789
88.95	3	1.0767
89	2.7333	1.0934
89.05	3	1.0766
89.1	2.5333	1.1413
89.15	0.066667	1.1213
89.2	0.13333	1.1544
89.25	0.66667	1.1083
89.3	0.26667	1.0845
89.35	0.4	1.1256
89.4	0.2	1.1243
89.45	1.7333	1.0448
89.5	3	1.1184
89.55	3	1.0963
89.6	3	1.1304
89.65	3	1.0832
89.7	3	1.2044
89.75	3	1.1983
89.8	3	1.1133
89.85	3	1.1502
89.9	3	1.1746
89.95	3	1.1734
90	3	1.1316
90.05	0.66667	1.0914
90.1	0.46667	1.1305
90.15	0.26667	1.1105
90.2	0.33333	1.092
90.25	0.066667	1.0676
90.3	0.46667	1.0285
90.35	0.2	1.0562
90.4	0.13333	1.0203
90.45	0.066667	0.99471
90.5	0.13333	0.98424
90.55	0.53333	1.0018
90.6	0.26667	0.99298
90.65	0.13333	0.98825
90.7	0.73333	1.0348
90.75	1.1333	0.98316
90.8	0.13333	0.95196
90.85	0.6	0.91874
90.9	0.4	0.88977
90.95	1.8667	0.93811
91	3	0.99304
91.05	3	0.98204
91.1	3	1.1852
91.15	3	1.1914
91.2	3	1.1594
91.25	3	1.1392
91.3	3	1.1717
91.35	3	1.173
91.4	3	1.1997
91.45	3	1.061
91.5	3	1.1119
91.55	3	1.1064
91.6	3	1.0812
91.65	3	1.0659
91.7	2.1333	1.0528
91.75	0.066667	1.1137
91.8	0.46667	1.1004
91.85	0.2	1.053
91.9	0.066667	1.0444
91.95	0.066667	1.0285
92	0.4	0.98151
92.05	0.73333	0.97083
92.1	0.26667	0.97238
92.15	0.4	0.96
92.2	3	0.91498
92.25	2.6667	0.9681
92.3	2.2	0.97401
92.35	1.0667	1.1641
92.4	0.33333	1.0385
92.45	0.66667	1.0427
92.5	0.26667	1.0651
92.55	0.2	1.0162
92.6	2.6667	0.98406
92.65	3	0.97412
92.7	3	1.0071
92.75	3	1.0833
92.8	3	1.1099
92.85	3	1.0526
92.9	1.8	1.1301
92.95	0	1.1316
93	0.46667	1.0513
93.05	0.2	1.0154
93.1	0	0.98999
93.15	0.73333	1.003
93.2	0	0.98799
93.25	0.26667	0.98624
93.3	0.13333	0.95631
93.35	2.4667	0.93511
93.4	3	0.96271
93.45	0.73333	0.99159
93.5	0.13333	1.007
93.55	0.4	1.0086
93.6	1.2	0.98199
93.65	3	0.99194
93.7	3	0.9684
93.75	3	1.0012
93.8	3	1.0289
93.85	3	1.0295
93.9	0.46667	1.1805
93.95	0.2	1.0905
94	0.66667	1.0309
94.05	3	0.98095
94.1	3	0.9808
94.15	3	0.95832
94.2	3	0.9654
94.25	3	1.0357
94.3	3	1.0323
94.35	2.5333	1.0034
94.4	0.13333	1.0206
94.45	0.2	0.97145
94.5	0.46667	0.95162
94.55	0.2	0.94052
94.6	0.33333	0.94101
94.65	0.066667	0.92777
94.7	0.33333	0.94964
94.75	0.13333	0.9229
94.8	0.2	0.92275
94.85	0.33333	0.89272
94.9	0	0.93829
94.95	0.66667	0.91538
95	1.0667	0.86281
95.05	0.53333	0.91848
95.1	0.13333	0.97501
95.15	0.2	0.96795
95.2	0.066667	0.97662
95.25	0.73333	0.95116
95.3	0.13333	0.96526
95.35	1.0667	0.94969
95.4	3	0.90307
95.45	3	0.96661
95.5	2.2	1.0689
95.55	0.2	1.0939
95.6	0.2	1.0232
95.65	0.26667	0.99812
95.7	0.4	0.98468
95.75	0.4	0.98378
95.8	0.4	0.98704
95.85	0.13333	0.99603
95.9	0.066667	0.96504
95.95	0.33333	0.95202
96	0.33333	0.93071
96.05	0.53333	0.92269
96.1	0.13333	0.93966
96.15	1.2	0.92133
96.2	0.33333	0.92479
96.25	0.26667	0.924
96.3	2.2667	0.9448
96.35	3	0.94613
96.4	3	0.96438
96.45	3	1.0463
96.5	3	1.0294
96.55	3	0.99136
96.6	3	0.96994
96.65	3	0.97234
96.7	3	0.98336
96.75	3	0.98491
96.8	2.6667	0.98306
96.85	3	1.0096
96.9	1.6	1.0438
96.95	0.86667	0.9691
97	0.066667	0.9531
97.05	0.26667	0.93594
97.1	0.66667	0.89899
97.15	0.26667	0.89565
97.2	0.2	0.91135
97.25	0.066667	0.90237
97.3	0	0.90073
97.35	0.66667	0.87346
97.4	0.13333	0.85023
97.45	0.066667	0.86136
97.5	1.1333	0.89385
97.55	0.2	0.88445
97.6	0.066667	0.88557
97.65	0.13333	0.89403
97.7	0.2	0.89346
97.75	0.2	0.90171
97.8	0.46667	0.9073
97.85	0.4	0.89832
97.9	1.6667	0.91284
97.95	3	0.94459
98	3	0.96635
98.05	3	0.9343
98.1	3	0.95775
98.15	3	0.95069
98.2	3	0.9214
98.25	3	0.95623
98.3	2.0667	0.94938
98.35	0.46667	0.97858
98.4	0.53333	0.95025
98.45	0.13333	0.93277
98.5	0.46667	0.90401
98.55	0.26667	0.91067
98.6	0.86667	0.87978
98.65	0.066667	0.86708
98.7	0.13333	0.8781
98.75	0.53333	0.89975
98.8	0.2	0.8963
98.85	0.26667	0.85287
98.9	0.26667	0.88366
98.95	0.46667	0.88255
99	0.26667	0.88315
99.05	0.33333	0.9015
99.1	0.26667	0.89731
99.15	0.13333	0.88567
99.2	0.4	0.90785
99.25	0.066667	0.89122
99.3	0.13333	0.91021
99.35	0.66667	0.93239
99.4	0.066667	0.94297
99.45	0.13333	0.93634
99.5	1.5333	0.89759
99.55	0.86667	0.94316
99.6	0.6	0.95651
99.65	0.66667	0.92435
99.7	3	0.94611
99.75	3	0.93639
99.8	3	0.9357
99.85	3	0.98075
99.9	3	0.97145
99.95	3	0.98831
100	2.2667	0.95552
100.05	0.6	0.99003
100.1	0.13333	0.96765
100.15	0.13333	0.94879
100.2	0.53333	0.95236
100.25	0.13333	0.9353
100.3	0.66667	0.91229
100.35	0.2	0.89055
100.4	0.13333	0.88742
100.45	0.8	0.90237
100.5	0.6	0.91455
100.55	0.26667	0.90685
100.6	0.6	0.91521
100.65	0.86667	0.91527
100.7	0.066667	0.91448
100.75	0.066667	0.88424
100.8	0.46667	0.87271
100.85	0.066667	0.89382
100.9	1.4	0.89208
100.95	0.066667	0.91011
101	0.066667	0.89805
101.05	0.2	0.88067
101.1	0.73333	0.89328
101.15	0.13333	0.9111
101.2	1.0667	0.93019
101.25	3	0.89963
101.3	3	0.91235
101.35	3	0.94601
101.4	3	0.95617
101.45	3	0.99292
101.5	3	0.94396
101.55	3	0.92892
101.6	3	0.93505
101.65	3	0.95393
101.7	3	0.95197
101.75	3	0.92375
101.8	2.0667	0.90531
101.85	0.93333	0.89122
101.9	0.13333	0.88437
101.95	0.26667	0.86689
102	0	0.88971
102.05	0.26667	0.89509
102.1	0.2	0.87473
102.15	0	0.86629
102.2	0.4	0.87602
102.25	0.066667	0.85939
102.3	0.066667	0.86711
102.35	0.46667	0.87802
102.4	0.2	0.89403
102.45	0.53333	0.87952
102.5	0.4	0.87246
102.55	0.26667	0.88188
102.6	0.13333	0.88343
102.65	0.26667	0.87753
102.7	0.13333	0.89355
102.75	0	0.8867
102.8	0.53333	0.88718
102.85	0.46667	0.86332
102.9	0.33333	0.85711
102.95	0.46667	0.9014
103	0.33333	0.9138
103.05	0.2	0.93215
103.1	0.33333	0.94986
103.15	0.46667	0.94993
103.2	0.46667	0.91543
103.25	0.2	0.94845
103.3	0.2	0.94926
103.35	0.33333	0.95517
103.4	0.26667	0.9245
103.45	0.13333	0.9487
103.5	0.13333	0.95578
103.55	0.73333	0.94627
103.6	3	0.9039
103.65	3	0.8911
103.7	3	0.9439
103.75	3	1.0422
103.8	3	1.0538
103.85	3	0.98886
103.9	3	0.96861
103.95	3	0.96718
104	3	0.95916
104.05	3	0.96422
104.1	3	0.95896
104.15	0.73333	1.0027
104.2		1.0031
104.25		0.98254
104.3	0.13333	0.95602
104.35	0.53333	0.953
104.4	0.066667	0.94498
104.45	0.066667	0.94302
104.5	0.066667	0.92596
104.55	0.6	0.93814
104.6	0.26667	0.9398
104.65	0.13333	0.93018
104.7	0.4	0.93376
104.75	0.2	0.96157
104.8	0.2	0.95334
104.85	1.6	0.92479
104.9	3	0.95272
104.95	3	0.9162
105	3	0.91435
105.05	3	1.0456
105.1	3	0.96147
105.15	3	1.0044
105.2	3	1.0081
105.25	3	0.95527
105.3	2.2667	1.0099
105.35	0.53333	1.0067
105.4	0.4	0.97821
105.45	0.86667	0.95839
105.5	0.26667	0.93591
105.55	0.73333	0.94458
105.6	0.33333	0.87574
105.65	0.26667	0.89398
105.7	0.86667	0.88054
105.75	0.33333	0.9225
105.8	1	0.90629
105.85	0.4	0.96175
105.9	0.53333	0.99329
105.95	0.2	1.0048
106	0	1.0013
106.05	1.8	1.0019
106.1	3	0.91304
106.15	3	0.96127
106.2	3	1.0563
106.25	3	0.96363
106.3	3	0.97166
106.35	3	0.96109
106.4	3	0.98263
106.45	3	0.93984
106.5	3	0.93012
106.55	2.1333	0.98526
106.6	0.6	0.90121
106.65	0.53333	0.93264
106.7	0.73333	0.99194
106.75	0.066667	0.94744
106.8	0.33333	0.89614
106.85	0	0.91566
106.9	2.8667	0.95847
106.95	0.33333	0.94854
107	0.066667	0.9167
107.05	0.066667	0.88975
107.1	0.26667	0.89524
107.15	0.4	0.90944
107.2	0.4	0.90897
107.25	1.2	0.88436
107.3	0.33333	0.91834
107.35	2.7333	0.91447
107.4	3	0.95887
107.45	3	0.92161
107.5	3	0.94709
107.55	3	1.1119
107.6	3	1.1007
107.65	1.6667	1.078
107.7	0.2	1.0455
107.75	0.13333	1.0752
107.8	2.4667	0.95362
107.85	3	1.0093
107.9	3	1.0623
107.95	3	0.99039
108	3	0.99704
108.05	3	0.9752
108.1	3	1.0723
108.15	3	1.0305
108.2	0.93333	1.0683
108.25	0.53333	1.0815
108.3	0.53333	0.96583
108.35	3	0.96898
108.4	3	0.88131
108.45	3	0.86648
108.5	3	0.84124
108.55	3	0.86469
108.6	1.8	0.89176
108.65	3	0.9267
108.7	2.9333	0.88604
108.75	0.46667	0.93012
108.8	0.46667	0.94847
108.85	0.2	0.92557
108.9	1.9333	0.95615
108.95	3	0.9913
109	3	0.96031
109.05	1.2	1.0885
109.1	0.13333	1.0571
109.15	0	1.023
109.2	2.2	0.98523
109.25	3	0.94786
109.3	2.4	0.93654
109.35	3	1.027
109.4	3	1.0011
109.45	1.6	1.0605
109.5	0.26667	0.98623
109.55	0.66667	0.94642
109.6	2.7333	0.93851
109.65	3	0.93378
109.7	3	0.94171
109.75	3	0.97761
109.8	2.4	1.0315
109.85	0.33333	1.042
109.9	1.5333	1.0215
109.95	3	0.99327
110	3	0.95272
110.05	3	0.99244
110.1	3	1.0389
110.15	3	0.98565
110.2	2.8	0.99369
110.25	2.6667	0.98822
110.3	3	0.97701
110.35	1.2	0.9708
110.4	0.33333	1.0118
110.45	1.0667	0.98708
110.5	3	0.96152
110.55	3	0.90597
110.6	3	0.99843
110.65	1.8	1.0357
110.7	0.26667	1.0312
110.75	1	0.98479
110.8	3	0.94806
110.85	3	0.97843
110.9	3	1.0025
110.95	0.86667	1.0604
111	0.73333	0.95054
111.05	3	0.96326
111.1	3	0.98289
111.15	3	0.94413
111.2	3	0.94037
111.25	3	0.95521
111.3	3	0.99972
111.35	1.4667	1.0998
111.4	0.066667	1.0497
111.45	0.26667	0.97162
111.5	1.0667	0.96732
111.55	0.33333	0.97376
111.6	0.2	1.0255
111.65	0.6	0.99505
111.7	0.33333	0.98532
111.75	3	0.92446
111.8	3	0.97162
111.85	3	1.0581
111.9	3	1.0657
111.95	3	1.0406
[truncated: 163 more rows]

## Sheet: central_A7841
Time [hrs]	Waking [min/3min]	Bioluminescence	Wake bouts (='1') and sleep bouts (='0')
12.05	0.666667	154.221
12.1	1.8	156.638
12.15	0.8	144.943
12.2	2.73333	151.338
12.25	3	143.199
12.3	3	146.838
12.35	1.6	131.233
12.4	0.333333	117.694	0
12.45	0.533333	123.622	0
12.5	1	127.328	0
12.55	1.13333	120.055	0
12.6	3	132.45	1
12.65	3	137.089	1
12.7	3	122.795	1
12.75	3	116.522	1
12.8	2.53333	113.45	1
12.85	0.333333	102.356	0
12.9	0.333333	98.7284	0
12.95	0.333333	102.145	0
13	1.46667	98.4064	0
13.05	0.133333	99.6454	0
13.1	2.46667	108.64
13.15	2.66667	106.212
13.2	0.666667	105.962
13.25	0.733333	95.6236
13.3	2.2	107.263
13.35	0.466667	102.635
13.4	0.666667	99.6739
13.45	1.4	99.5351
13.5	2.66667	105.219
13.55	0.866667	101.413
13.6	0.4	94.4521
13.65	0.4	91.5133
13.7	0	93.3968
13.75	2.26667	92.858
13.8	3	103.719
13.85	3	99.3582
13.9	0.733333	91.6417	0
13.95	0.8	97.0362	0
14	0.333333	92.5863	0
14.05	1.2	92.5809	0
14.1	3	93.931	1
14.15	3	92.17	1
14.2	3	96.2756	1
14.25	3	97.3146	1
14.3	3	105.398	1
14.35	3	125.926	1
14.4	3	143.72	1
14.45	3	137.582	1
14.5	2.06667	150.754	1
14.55	0.6	151.838
14.6	0.266667	174.165
14.65	0.466667	123.449
14.7	0.6	123.288
14.75	3	141.994
14.8	2.6	129.632
14.85	0.333333	127.005
14.9	0.6	108.666
14.95	0.866667	115.972
15	0.866667	121.677
15.05	0.866667	121.539
15.1	1.6	117.733
15.15	3	117.239
15.2	0.133333	112.9
15.25	0.733333	106.561
15.3	2.4	105.022	1
15.35	3	108.173	1
15.4	3	112.256	1
15.45	3	126.139	1
15.5	3	127.201	1
15.55	3	142.573	1
15.6	3	160.834	1
15.65	3	174.562	1
15.7	3	161.223	1
15.75	2.73333	154.262	1
15.8	0.133333	132.657	0
15.85	0.066667	121.029	0
15.9	0.333333	118.735	0
15.95	0.333333	117.129	0
16	1.46667	146.791	0
16.05	3	195.252	1
16.1	3	174.958	1
16.15	3	180.33	1
16.2	3	174.791	1
16.25	3	151.386	1
16.3	2.73333	147.158	1
16.35	0.8	141.086	0
16.4	0.2	132.792	0
16.45	0.266667	123.297	0
16.5	0.4	127.603	0
16.55	0	133.153	0
16.6	0.866667	130.236	0
16.65	2.86667	138.675	1
16.7	3	133.892	1
16.75	3	129.042	1
16.8	3	137.215	1
16.85	3	126.276	1
16.9	3	152.359	1
16.95	3	160.132	1
17	3	136.104	1
17.05	1.93333	143.587	1
17.1	0.466667	118.204
17.15	2.73333	131.532	1
17.2	3	144.727	1
17.25	3	130.966	1
17.3	0.6	114.382	0
17.35	0.466667	127.844	0
17.4	0.733333	144.46	0
17.45	0.333333	120.655	0
17.5	0	110.294	0
17.55	0.466667	111.777	0
17.6	0.133333	111.461	0
17.65	0.933333	114.5	0
17.7	3	123.139
17.75	3	127.133
17.8	2.46667	123.039
17.85	1.2	112.967
17.9	0.533333	128.65
17.95	0.6	112.289
18	1.2	106.151
18.05	3	118.545
18.1	1.4	106.74
18.15	0.733333	104.312
18.2	0.666667	105.684
18.25	0.266667	109.546
18.3	0.333333	101.54
18.35	0.466667	98.3569
18.4	0.266667	103.263
18.45	0.933333	113.835
18.5	0.666667	104.985
18.55	0.333333	101.691
18.6	0.266667	103.996
18.65	0.2	108.835
18.7	0.533333	100.963
18.75	1.06667	107.847
18.8	3	103.908
18.85	3	106.969
18.9	3	109.319
18.95	2.93333	108.358
19	0.4	104.419
19.05	0.2	109.747
19.1	0.066667	111.942
19.15	0.6	100.047
19.2	2.86667	110.02
19.25	3	106.725
19.3	3	109.764
19.35	0.666667	110.981
19.4	0.066667	110.243
19.45	2.93333	110.082
19.5	0.533333	102.876
19.55	0.333333	99.6262
19.6	0.333333	103.732
19.65	1.2	101.46
19.7	2.86667	107.588
19.75	0.466667	102.36	0
19.8	0.666667	105.888	0
19.85	0.533333	100.371	0
19.9	3	109.477	1
19.95	3	105.783	1
20	3	111.51	1
20.05	3	110.905	1
20.1	3	112.944	1
20.15	3	138.961	1
20.2	3	156.244	1
20.25	3	148.417	1
20.3	3	147.456	1
20.35	1.2	152.339	0
20.4	0.133333	172.778	0
20.45	0.066667	174.684	0
20.5	0.533333	175.323	0
20.55	0.266667	176.051	0
20.6	0.266667	147.623	0
20.65	0.333333	146.062	0
20.7	0.733333	152.723	0
20.75	0.333333	149.984	0
20.8	0.533333	146.823	0
20.85	0.666667	141.951	0
20.9	0.8	138.257	0
20.95	0.733333	142.451	0
21	0.6	132.579	0
21.05	0.066667	127.729	0
21.1	3	127.924	1
21.15	3	124.074	1
21.2	3	128.18	1
21.25	3	126.263	1
21.3	3	128.969	1
21.35	3	120.786	1
21.4	2.2	123.158	1
21.45	2.26667	118.175	1
21.5	0.466667	117.969	0
21.55	0.2	109.942	0
21.6	0.466667	105.936	0
21.65	0.466667	114.553	0
21.7	0.866667	119.503	0
21.75	3	124.075
21.8	3	116.425
21.85	0.466667	108.287
21.9	0.533333	112.126
21.95	0.133333	110.009
22	0.466667	109.359
22.05	0.533333	103.176
22.1	3	111.948
22.15	1.33333	111.165
22.2	0.066667	106.96
22.25	0.466667	110.021
22.3	0.333333	107.882
22.35	0.933333	105.61
22.4	2	107.493
22.45	0.066667	109.088
22.5	0.733333	107.171
22.55	0.066667	104.166
22.6	0.333333	105.738
22.65	1.53333	107.111
22.7	3	104.883
22.75	3	105.766
22.8	0.866667	107.583
22.85	3	109.111	1
22.9	3	111.572	1
22.95	3	123.789	1
23	3	163.584	1
23.05	3	183.6	1
23.1	3	183.684	1
23.15	3	185.167	1
23.2	3	165.362	1
23.25	2.86667	175.912	1
23.3	0.666667	150.306	0
23.35	0.266667	126.434	0
23.4	0.8	127.14	0
23.45	0.133333	131.157	0
23.5	0.533333	129.107	0
23.55	0.333333	129.368	0
23.6	2.06667	153.563	1
23.65	3	183.98	1
23.7	3	145.774	1
23.75	2.8	131.257	1
23.8	2.93333	133.208	1
23.85	3	137.913	1
23.9	3	151.375	1
23.95	3	143.214	1
24	3	160.697	1
24.05	3	192.336	1
24.1	3	177.731	1
24.15	3	195.125	1
24.2	3	175.431	1
24.25	3	161.092	1
24.3	0.666667	124.042	0
24.35	0.2	118.903	0
24.4	0.2	116.498	0
24.45	0.4	121.315	0
24.5	0.4	138.465	0
24.55	0.466667	139.615	0
24.6	0.866667	136.076	0
24.65	0.533333	129.959	0
24.7	0.4	120.843	0
24.75	0.533333	126.393	0
24.8	3	137.565
24.85	3	132.36
24.9	1.33333	132.599	0
24.95	0.133333	126.371	0
25	0.333333	128.988	0
25.05	0.533333	123.183	0
25.1	0.466667	118.51	0
25.15	0.2	118.661	0
25.2	0.333333	115.122	0
25.25	0.133333	118.939	0
25.3	0.8	123.578	0
25.35	1.2	119.416	0
25.4	0.133333	122.722	0
25.45	1.06667	118.228	0
25.5	0.533333	120.778	0
25.55	0.4	130.75	0
25.6	0.4	127.945	0
25.65	0.2	123.762	0
25.7	1.06667	120.556	0
25.75	1	115.217	0
25.8	0.466667	124.434	0
25.85	0.8	118.584	0
25.9	0.8	116.557	0
25.95	0.533333	117.062	0
26	0.6	112.257	0
26.05	0.6	112.451	0
26.1	0.8	116.379	0
26.15	3	110.485	1
26.2	3	114.657	1
26.25	3	106.83	1
26.3	3	109.291	1
26.35	3	109.53	1
26.4	3	109.347	1
26.45	3	113.963	1
26.5	3	115.358	1
26.55	3	118.686	1
26.6	3	128.369	1
26.65	3	127.319	1
26.7	3	131.025	1
26.75	3	133.775	1
26.8	2.6	133.77	1
26.85	0.2	138.542	0
26.9	1.26667	139.07	0
26.95	0.533333	124.064	0
27	0.2	125.259	0
27.05	0.533333	122.254	0
27.1	0.066667	120.759	0
27.15	0	120.065	0
27.2	0.4	113.748	0
27.25	1.13333	117.81	0
27.3	0.2	117.271	0
27.35	0	118.932	0
27.4	0.2	121.727	0
27.45	0.266667	118.343	0
27.5	0.533333	122.538	0
27.55	0.2	112.91	0
27.6	0.2	109.171	0
27.65	0.333333	109.788	0
27.7	0.4	112.449	0
27.75	0.6	114.022	0
27.8	0.133333	108.372	0
27.85	0.2	115.3	0
27.9	1	116.916	0
27.95	0	106.956	0
28	2.53333	113.15
28.05	2.8	107.967
28.1	0.533333	110.228	0
28.15	0.333333	107.934	0
28.2	0.133333	102.817	0
28.25	0.2	107.301	0
28.3	0.066667	107.562	0
28.35	0.466667	105.29	0
28.4	1.4	106.106	0
28.45	0.333333	105.923	0
28.5	0.6	107.473	0
28.55	0	99.1346	0
28.6	0.533333	102.596	0
28.65	0.266667	103.079	0
28.7	0.4	102.718	0
28.75	0.4	102.491	0
28.8	1	105.863	0
28.85	0.266667	105.413	0
28.9	0.666667	105.83	0
28.95	0.333333	105.98	0
29	0.733333	100.575	0
29.05	2	102.347	1
29.1	3	103.341	1
29.15	3	103.358	1
29.2	3	101.375	1
29.25	3	104.258	1
29.3	3	108.631	1
29.35	3	103.292	1
29.4	3	103.398	1
29.45	2.8	104.103	1
29.5	3	103.098	1
29.55	3	101.737	1
29.6	3	108.442	1
29.65	3	106.015	1
29.7	2.06667	100.498	1
29.75	0.266667	103.893	0
29.8	0.266667	110.287	0
29.85	0.666667	106.304	0
29.9	0.866667	103.854	0
29.95	0.066667	102.471	0
30	0.2	105.266	0
30.05	0.2	98.0823	0
30.1	0.2	99.2769	0
30.15	0.133333	99.5159	0
30.2	0.8	98.5993	0
30.25	0.066667	100.305	0
30.3	0.266667	101.344	0
30.35	1.13333	102.45	0
30.4	0.533333	99.0664	0
30.45	0.4	105.15	0
30.5	0.466667	101.167	0
30.55	0.6	98.8501	0
30.6	0.333333	109.534	0
30.65	0.933333	104.528	0
30.7	0.666667	103.523	0
30.75	0.8	99.9838	0
30.8	1.4	103.423	0
30.85	3	103.44
30.9	3	98.8119
30.95	0.933333	102.962
31	0.2	105.779
31.05	0.133333	99.84
31.1	0.2	99.5013
31.15	0.6	98.7625
31.2	0.333333	99.9126
31.25	0.533333	101.885
31.3	1.4	101.48
31.35	0.533333	94.3629
31.4	0.466667	100.002
31.45	0.333333	99.9076
31.5	0.933333	96.2799
31.55	0.6	96.4967
31.6	1.06667	100.18
31.65	0.333333	104.619
31.7	0.933333	99.0803
31.75	0.8	96.6527
31.8	0.866667	98.2028
31.85	0.133333	104.997
31.9	0.466667	102.725
31.95	2.46667	101.32	1
32	3	103.025	1
32.05	3	99.8644	1
32.1	2.06667	95.7701	1
32.15	0.2	100.853	0
32.2	0.133333	98.4259	0
32.25	0.266667	98.5315	0
32.3	1.13333	98.9928	0
32.35	1	97.6317	0
32.4	0.933333	99.7152	0
32.45	0.133333	97.0653	0
32.5	0.6	94.371	0
32.55	0.2	98.2544	0
32.6	0.066667	94.8712	0
32.65	1.06667	98.5324	0
32.7	0.866667	97.8825	0
32.75	0.733333	94.0326	0
32.8	0.8	97.0049	0
32.85	0.466667	91.1328	0
32.9	0.4	93.9496	0
32.95	0.133333	96.2775	0
33	1.6	97.672
33.05	1	99.6222
33.1	0.866667	97.1723
33.15	0.666667	100.433
33.2	0.266667	99.7614
33.25	1.73333	100.289
33.3	0.866667	97.6838	0
33.35	0.466667	96.9006	0
33.4	0.133333	99.6063	0
33.45	0.466667	99.5786	0
33.5	0.333333	99.1065	0
33.55	0.8	98.6566	0
33.6	2.93333	97.4956	1
33.65	3	100.335	1
33.7	3	97.6847	1
33.75	3	97.3015	1
33.8	3	99.096	1
33.85	3	97.7128	1
33.9	3	97.6407	1
33.95	3	106.146	1
34	2.2	110.852	1
34.05	0.6	111.313	0
34.1	0.066667	110.152	0
34.15	0.333333	113.102	0
34.2	0.666667	121.652	0
34.25	0.2	118.114	0
34.3	0.8	110.442	0
34.35	0.533333	112.925	0
34.4	0.466667	109.386	0
34.45	1.46667	113.87	0
34.5	0.4	101.686	0
34.55	0.533333	106.77	0
34.6	0	103.809	0
34.65	1.13333	105.337	0
34.7	0.266667	103.931	0
34.75	0.933333	106.104	0
34.8	0.933333	109.943	0
34.85	0.933333	105.915	0
34.9	0.533333	104.998	0
34.95	1.26667	104.504	0
35	2.26667	102.476
35.05	3	107.96
35.1	0.866667	103.066
35.15	0.733333	102.704
35.2	0.466667	102.677
35.25	1.46667	103.36
35.3	0.2	103.022
35.35	0.533333	103.283
35.4	0.866667	103.655
35.45	1.06667	103.805
35.5	0.6	101.711
35.55	0.933333	101.35
35.6	1.53333	104.144
35.65	0.733333	100.45	0
35.7	0.666667	99.3557	0
35.75	1.13333	103.373	0
35.8	1.13333	98.367	0
35.85	2.8	101.139	1
35.9	3	103.067	1
35.95	3	102.506	1
36	2.73333	103.123	1
36.05	3	115.429	1
36.1	2.66667	121.179	1
36.15	0.2	111.173
36.2	0.4	107.635
36.25	0.666667	113.096
36.3	0.2	107.935
36.35	1.6	115.107
36.4	2.6	127.124
36.45	3	129.318
36.5	1.13333	117.135
36.55	1.8	119.685
36.6	1.53333	115.813
36.65	0.666667	109.452
36.7	2.53333	118.713
36.75	0.866667	104.752
36.8	3	111.414
36.85	3	119.475
36.9	2.86667	120.025
36.95	2.93333	121.686
37	0.2	111.281
37.05	0.866667	119.897
37.1	1	125.47
37.15	3	149.264
37.2	2.6	138.437
37.25	0.866667	124.787
37.3	2.66667	125.692
37.35	3	124.554
37.4	2.46667	128.615
37.45	3	131.365
37.5	3	130.226
37.55	1	134.021
37.6	1.93333	129.038
37.65	3	151.988
37.7	3	148.471
37.75	1.66667	170.955
37.8	2.6	159.238
37.85	3	178.077
37.9	1.06667	157.538	0
37.95	0.666667	152.155	0
38	0.866667	144.727	0
38.05	3	144.522	1
38.1	3	154.739	1
38.15	3	170.578	1
38.2	2.86667	156.483	1
38.25	3	167.811	1
38.3	3	137.339	1
38.35	2.93333	136.112	1
38.4	0.133333	118.462
38.45	0.6	127.923
38.5	0.4	119.629
38.55	1.8	128.245
38.6	1.26667	138.218
38.65	0.8	137.323
38.7	1.4	131.629
38.75	3	125.757
38.8	2.13333	127.529
38.85	1.2	128.99
38.9	3	121.14
38.95	3	126.757
39	3	153.463
39.05	2.53333	151.524
39.1	0.466667	142.052
39.15	0.666667	148.98
39.2	3	151.286
39.25	3	151.969
39.3	1.2	148.052
39.35	0.466667	149.358
39.4	1.86667	146.397
39.45	3	143.525
39.5	0.733333	146.231
39.55	0.8	146.914
39.6	3	133.331
39.65	3	133.859
39.7	2.6	145.987
39.75	2.93333	160.048
39.8	3	179.842
39.85	3	201.104
39.9	3	174.187
39.95	3	174.226
40	3	180.732
40.05	3	165.815
40.1	3	151.654
40.15	3	168.315
40.2	3	164.532
40.25	1.2	171.127	0
40.3	0.2	170.543	0
40.35	0.4	182.427	0
40.4	1.2	132.333	0
40.45	1.6	148.483	1
40.5	3	144.011	1
40.55	3	142.05	1
40.6	3	155.266	1
40.65	3	156.35	1
40.7	3	153.856	1
40.75	3	141.095	1
40.8	3	149.022	1
40.85	3	165.595	1
40.9	3	149.367	1
40.95	1.46667	134.317	0
41	1	125.289	0
41.05	0.333333	140.44	0
41.1	0.666667	148.434	0
41.15	0.866667	144.784	0
41.2	2.53333	171.845
41.25	0.666667	139.151
41.3	1.26667	142.79
41.35	3	133.696
41.4	3	136.113
41.45	0.266667	129.84
41.5	1.13333	129.902
41.55	1	137.096
41.6	0.6	128.824
41.65	2	129.552
41.7	3	128.769
41.75	3	125.141
41.8	1.26667	119.469
41.85	1.53333	127.352
41.9	2.53333	127.08
41.95	3	124.564
42	3	132.958
42.05	3	145.575
42.1	3	130.059
42.15	3	144.875
42.2	3	156.07
42.25	3	160.864
42.3	3	163.437
42.35	3	174.165
42.4	3	206.248
42.45	3	177.931
42.5	3	203.793
42.55	3	184.054
42.6	3	192.626
42.65	3	158.332
42.7	2	147.393
42.75	0.2	137.299
42.8	0.333333	131.605
42.85	0.266667	131.355
42.9	0.4	132.305
42.95	2.4	146.633
43	1.93333	138.049
43.05	0.466667	131.333
43.1	0.533333	124.283
43.15	0.333333	139.1
43.2	0	127.405
43.25	2.93333	137.6
43.3	3	135.283
43.35	3	135.767
43.4	1.2	132.383
43.45	0.266667	133.667
43.5	0.533333	114.639
43.55	1.93333	135.545
43.6	0.666667	133.828	0
43.65	0.733333	136.179	0
43.7	0.6	123.418	0
43.75	0.4	118.501	0
43.8	1.13333	118.918	0
43.85	3	128.801	1
43.9	3	129.462	1
43.95	3	134.301	1
44	3	152.474	1
44.05	3	171.557	1
44.1	3	177.174	1
44.15	1.13333	160.391	0
44.2	1.06667	171.052	0
44.25	0.4	143.158	0
44.3	0.4	153.197	0
44.35	0.8	143.169	0
44.4	0.266667	141.03	0
44.45	0.4	124.714	0
44.5	0.866667	131.242	0
44.55	0.2	124.569	0
44.6	0.466667	122.008	0
44.65	1.33333	147.025	0
44.7	0.2	137.998	0
44.75	0.933333	127.992	0
44.8	0.266667	150.809	0
44.85	0.4	130.448	0
44.9	0.4	140.731	0
44.95	0.6	139.17	0
45	0.8	129.387	0
45.05	0.866667	128.293	0
45.1	1	133.776	0
45.15	3	130.86	1
45.2	3	129.543	1
45.25	3	121.36	1
45.3	3	126.532	1
45.35	3	127.149	1
45.4	3	131.21	1
45.45	3	127.605	1
45.5	3	120.244	1
45.55	1.06667	118.66
45.6	3	124.922	1
45.65	2.86667	129.45	1
45.7	2.26667	124.711	1
45.75	0.066667	112.816	0
45.8	0.466667	109.255	0
45.85	0.266667	115.406	0
45.9	1.46667	113.022	0
45.95	1.46667	121.261	0
46	0.466667	114.656	0
46.05	1.06667	120.739	0
46.1	0.6	123.489	0
46.15	0.066667	123.706	0
46.2	1.13333	118.612	0
46.25	2.66667	118.895	1
46.3	3	113.512	1
46.35	3	118.018	1
46.4	2.53333	123.168	1
46.45	1.4	127.407	0
46.5	0.6	142.29	0
46.55	0.933333	148.729	0
46.6	0.866667	152.279	0
46.65	0.933333	137.718	0
46.7	1.13333	150.646	0
46.75	3	138.841	1
46.8	3	139.458	1
46.85	3	131.03	1
46.9	3	131.291	1
46.95	3	134.352	1
47	1.33333	128.258
47.05	0.933333	124.008
47.1	0.2	117.536
47.15	1.53333	121.775
47.2	0.133333	119.125
47.25	3	121.875	1
47.3	3	120.625	1
47.35	3	121.687	1
47.4	3	131.948	1
47.45	3	128.453	1
47.5	3	129.804	1
47.55	3	123.109	1
47.6	3	124.126	1
47.65	3	123.187	1
47.7	3	124.537	1
47.75	3	120.999	1
47.8	3	121.082	1
47.85	3	120.832	1
47.9	3	120.915	1
47.95	3	119.399	1
48	3	118.571	1
48.05	1.93333	116.321	1
48.1	0.333333	112.449	0
48.15	0.066667	114.199	0
48.2	0.2	111.038	0
48.25	0.933333	117.611	0
48.3	0.133333	117.472	0
48.35	0.266667	114.444	0
48.4	0.333333	116.883	0
48.45	0.533333	117.278	0
48.5	0.4	114.206	0
48.55	0.466667	114.378	0
48.6	1.33333	110.261	0
48.65	2.4	110.634
48.7	0.4	112.34
48.75	0.266667	107.756
48.8	0.4	107.951
48.85	0.266667	107.323
48.9	0.066667	107.584
48.95	1.26667	109.512
49	0.666667	111.618
49.05	1.73333	110.457
49.1	2.53333	109.807
49.15	0.733333	114.624
49.2	0.733333	111.796
49.25	0.066667	109.569
49.3	0.6	110.074
49.35	0.133333	111.18
49.4	0.2	107.063
49.45	0.266667	110.569
49.5	2.06667	107.052
49.55	0.133333	112.336
49.6	0.2	109.93
49.65	0.266667	109.614
49.7	0.2	111.031
49.75	1.2	108.714
49.8	1	114.02
49.85	0.6	110.325
49.9	0.6	112.898
49.95	1.13333	115.048
50	0.333333	111.309
50.05	0.333333	109.592
50.1	0.266667	115.254
50.15	1.4	111.404
50.2	1.2	108.865
50.25	3	112.904	1
50.3	3	109.587	1
50.35	2.2	111.36	1
50.4	1.73333	110.865	1
50.45	0.2	105.771	0
50.5	0.133333	106.81	0
50.55	0.6	104.56	0
50.6	0.866667	115.444	0
50.65	0.533333	109.905	0
50.7	1.06667	110.988	0
50.75	0.466667	104.894	0
50.8	0.533333	106.266	0
50.85	0.266667	109.461	0
50.9	0	107.7	0
50.95	0.533333	111.317	0
51	0.133333	107.422	0
51.05	0.133333	105.839	0
51.1	0.733333	109.967	0
51.15	0.066667	111.45	0
51.2	0.266667	108.201	0
51.25	0.066667	110.528	0
51.3	0.4	106.034	0
51.35	0.733333	108.451	0
51.4	0.266667	102.734	0
51.45	0.333333	105.418	0
51.5	0.333333	110.679	0
51.55	0.4	111.518	0
51.6	0.8	108.135	0
51.65	0.8	108.552	0
51.7	0.266667	106.635	0
51.75	1.13333	106.763	0
51.8	0.8	111.713	0
51.85	0	105.552	0
51.9	1.4	107.858	0
51.95	2.46667	109.208
52	2.73333	108.402
52.05	3	108.419
52.1	1.73333	104.302
52.15	0.866667	109.386
52.2	0.533333	111.714
52.25	1.66667	107.597
52.3	2.06667	106.525
52.35	0.133333	107.053
52.4	0.266667	105.514
52.45	0.266667	107.02
52.5	0.066667	105.614
52.55	0.4	105.476
52.6	0.266667	106.692
52.65	0.066667	108.287
52.7	0.8	102.926
52.75	0.666667	109.832
52.8	0.2	105.026
52.85	0.333333	105.11
52.9	0.133333	105.438
52.95	0.333333	104.01
53	0.933333	108.293
53.05	0.333333	110.266
53.1	0.4	108.527
53.15	0.4	104.566
53.2	0.4	104.516
53.25	0.8	102.51
53.3	3	106.461
53.35	2.4	105.522
53.4	0.533333	109.672
53.45	0.466667	107.955
53.5	0.666667	107.083
53.55	0.4	108.678
53.6	0.533333	105.228
53.65	0.066667	107.356
53.7	1	110.173
53.75	0.733333	106.923
53.8	0.2	103.873
53.85	0.6	103.667
53.9	0.266667	106.773
53.95	0.2	105.279
54	0.866667	104.362
54.05	0.866667	103.601
54.1	0.333333	106.885
54.15	1.66667	105.013
54.2	0.2	106.674
54.25	1.86667	105.602
54.3	1.33333	104.041	0
54.35	0.533333	107.413	0
54.4	0.4	101.23	0
54.45	0.2	103.291	0
54.5	0.2	100.597	0
54.55	0	105.458	0
54.6	0.733333	107.697	0
54.65	1.4	108.38	0
54.7	0.866667	103.775	0
54.75	0.4	107.858	0
54.8	0.733333	106.275	0
54.85	0	109.003	0
54.9	2.53333	108.153	1
54.95	3	107.792	1
55	3	106.564	1
55.05	3	106.603	1
55.1	3	107.509	1
55.15	3	109.37	1
55.2	3	113.965	1
55.25	3	128.093	1
55.3	3	136.109	1
55.35	3	150.193	1
55.4	3	144.187	1
55.45	3	137.026	1
55.5	3	132.621	1
55.55	3	137.571	1
55.6	3	136.632	1
55.65	3	128.649	1
55.7	2.6	135.844	1
55.75	1.06667	127.883	0
55.8	0.333333	115.522	0
55.85	0.133333	116.916	0
55.9	0.6	117.177	0
55.95	0.4	114.639	0
56	0.466667	116.278	0
56.05	0.2	111.939	0
56.1	0.333333	111.844	0
56.15	1.13333	115.883	0
56.2	0.133333	111.256	0
56.25	0.066667	113.806	0
56.3	0.466667	114.556	0
56.35	0.2	109.751	0
56.4	0.333333	109.901	0
56.45	0.466667	110.695	0
56.5	0.066667	107.179	0
56.55	0.6	110.551	0
56.6	0.333333	110.568	0
56.65	0.066667	112.673	0
56.7	1.06667	112.846	0
56.75	3	110.574	1
56.8	3	110.124	1
56.85	2.73333	111.874	1
56.9	2.73333	110.113	1
56.95	3	113.219	1
57	2.86667	108.835	1
57.05	3	105.808	1
57.1	3	107.002	1
57.15	1.6	110.286	1
57.2	0.066667	106.991	0
57.25	0.133333	106.052	0
57.3	0.533333	106.825	0
57.35	0.133333	108.419	0
57.4	0.666667	111.081	0
57.45	0.333333	105.12	0
57.5	0.333333	105.759	0
57.55	0.133333	105.109	0
57.6	1.53333	106.37
57.65	1.46667	109.942	0
57.7	0.333333	109.781	0
57.75	1.4	104.398	0
57.8	1.26667	107.104	0
57.85	0.2	110.587	0
57.9	0.4	108.937	0
57.95	1.2	108.887	0
58	0.066667	109.104	0
58.05	0.6	106.543	0
58.1	0.466667	105.827	0
58.15	0.266667	110.51	0
58.2	0.333333	104.305	0
58.25	0.4	104.455	0
58.3	0.666667	106.094	0
58.35	0.333333	106.377	0
58.4	2.4	103.838	1
58.45	3	104.9	1
58.5	3	104.694	1
58.55	3	106.733	1
58.6	2.8	106.061	1
58.65	2.33333	105.856	1
58.7	3	109.695	1
58.75	3	107.867	1
58.8	3	114.995	1
58.85	0.933333	112.234	0
58.9	0.4	110.962	0
58.95	0.4	112.734	0
59	0.4	106.151	0
59.05	0.866667	109.034	0
59.1	0.333333	111.806	0
59.15	0.466667	111.89	0
59.2	0.133333	109.129	0
59.25	0.733333	110.457	0
59.3	0.2	107.096	0
59.35	0.666667	108.957	0
59.4	0.2	101.952	0
59.45	1	104.057	0
59.5	3	111.674	1
59.55	3	106.18	1
59.6	2.86667	105.574	1
59.65	0.6	105.991	0
59.7	0.533333	109.786	0
59.75	0.666667	107.536	0
59.8	0.666667	112.641	0
59.85	0.533333	110.147	0
59.9	0.6	105.808	0
59.95	1.8	106.558
60	3	106.175
60.05	2.66667	109.347
60.1	0.866667	107.053
60.15	0.533333	103.737
60.2	0.533333	103.953
60.25	1.73333	106.903
60.3	0.266667	106.031
60.35	3	104.404
60.4	3	103.487
60.45	3	107.215
60.5	2.6	122.587
60.55	0.266667	122.16
60.6	1.13333	131.954
60.65	3	157.127
60.7	3	149.61
60.75	3	155.249
60.8	3	163.821
60.85	2.4	148.149
60.9	0.8	137.099
60.95	0.333333	118.672
61	2.66667	142.444
61.05	3	147.661
61.1	3	141.944
61.15	0.666667	126.228
61.2	2.86667	140.178
61.25	3	134.261
61.3	2.8	138.611
61.35	1.06667	127.561
61.4	1.86667	122.889
61.45	3	127.639
61.5	2.53333	132.723
61.55	2.6	128.006
61.6	1	124.312
61.65	1.33333	126.595
61.7	3	126.457
61.75	3	123.184
61.8	3	138.446
61.85	3	132.285
61.9	3	131.435
61.95	3	140.74
62	2.26667	138.824
62.05	2	125.774
62.1	3	119.746
62.15	3	121.941
62.2	1.4	121.758
62.25	3	122.752
62.3	3	122.769
62.35	1.2	119.052
62.4	1.93333	124.58
62.45	3	124.442
62.5	2	121.992
62.55	0.666667	122.409
62.6	0.733333	122.781
62.65	0.666667	122.02
62.7	1.8	118.192
62.75	3	119.965
62.8	3	119.737
62.85	2.66667	124.909
62.9	0.466667	122.793
62.95	0.8	125.143
63	0.266667	124.048
63.05	3	124.732
63.1	1.33333	124.793
63.15	1.86667	119.765
63.2	3	119.293
63.25	3	121.532
63.3	3	128.571
63.35	3	122.899
63.4	3	123.938
63.45	2.86667	123.888
63.5	3	118.305
63.55	3	119.388
63.6	1.53333	123.739
63.65	1.26667	121.578
63.7	3	119.661
63.75	3	118.856
63.8	2.93333	125.606
63.85	3	119.133
63.9	3	127.772
63.95	2.93333	120.367
64	2.8	123.05
64.05	2.2	124.823
64.1	0.266667	120.24
64.15	0.666667	117.945
64.2	0.466667	118.429
64.25	1.33333	119.379
64.3	3	124.885
64.35	3	122.59
64.4	0.666667	124.34	0
64.45	1.2	122.824	0
64.5	1.46667	120.174	0
64.55	0.8	122.48	0
64.6	0.333333	120.319	0
64.65	1.73333	121.402	1
64.7	3	121.752	1
64.75	3	116.169	1
64.8	2.6	123.075	1
64.85	1.66667	119.002	1
64.9	0.733333	119.775
64.95	1.53333	119.391
65	3	123.897
65.05	3	124.181
65.1	3	124.086
65.15	3	130.259
65.2	2.6	124.209
65.25	1.4	126.514
65.3	3	124.531
65.35	2.6	126.459
65.4	0.4	120.743
65.45	1.13333	125.493
65.5	0.4	124.132
65.55	2	120.726
65.6	3	120.432
65.65	2.4	123.338
65.7	0.466667	121.554
65.75	0.8	122.504
65.8	1.93333	126.054
65.85	3	119.338
65.9	1.06667	120.332
65.95	0.4	121.105
66	2.4	122.566
66.05	3	122.716
66.1	2.06667	124.711
66.15	1.26667	123.35
66.2	3	120.522	1
66.25	3	124.739	1
66.3	3	127.867	1
66.35	3	124.017	1
66.4	3	124.545	1
66.45	3	128.006	1
66.5	3	129.6	1
66.55	3	131.839	1
66.6	3	130.078	1
66.65	3	128.695	1
66.7	2.8	127.267	1
66.75	1.2	125.351	0
66.8	0.466667	121.101	0
66.85	0.2	125.229	0
66.9	0.333333	125.89	0
66.95	0.533333	125.929	0
67	1	122.035	0
67.05	0.266667	123.385	0
67.1	0	123.157	0
67.15	1.86667	121.307	1
67.2	3	126.213	1
67.25	3	122.963	1
67.3	3	124.202	1
67.35	3	119.419	1
67.4	1.8	124.102	1
67.45	0.066667	123.075	0
67.5	0.8	124.869	0
67.55	0.2	123.264	0
67.6	0.666667	124.058	0
67.65	0.333333	123.897	0
67.7	0	122.381	0
67.75	2.26667	123.731
67.8	3	123.059
67.85	3	126.187
67.9	2.26667	122.715
67.95	0.266667	125.265	0
68	1	123.504	0
68.05	0.466667	121.587	0
68.1	0.266667	122.204	0
68.15	2.33333	121.798	1
68.2	3	128.504	1
68.25	3	127.365	1
68.3	3	133.404	1
68.35	3	131.354	1
68.4	1.93333	129.749	1
68.45	0.266667	119.41	0
68.5	1.2	127.271	0
68.55	1.33333	124.644	0
68.6	0.333333	126.505	0
68.65	0.533333	123.9	0
68.7	1.06667	120.827	0
68.75	3	129.222	1
68.8	3	131.417	1
68.85	2	134.722	1
68.9	0.133333	131.783	0
68.95	0.666667	125.667	0
69	0.266667	128.417	0
69.05	0.466667	127.478	0
69.1	0.466667	126.828	0
69.15	1.6	129.378
69.2	0.666667	126.129	0
69.25	0.6	128.567	0
69.3	0.533333	127.429	0
69.35	0.4	125.379	0
69.4	0.4	124.596	0
69.45	3	128.057	1
69.5	3	126.318	1
69.55	3	128.357	1
69.6	3	127.663	1
69.65	3	131.657	1
69.7	3	134.052	1
69.75	2.93333	128.18	1
69.8	3	128.374	1
69.85	3	129.458	1
69.9	3	130.363	1
69.95	3	129.069	1
70	3	128.086	1
70.05	3	128.747	1
70.1	3	125.497	1
70.15	3	125.047	1
70.2	1.86667	127.597	1
70.25	0.133333	122.992	0
70.3	0.133333	125.275	0
70.35	0.2	127.225	0
70.4	0.6	125.131	0
70.45	0	127.17	0
70.5	0.466667	122.965	0
70.55	0.066667	124.67	0
70.6	0.2	124.309	0
70.65	1	126.593	0
70.7	0.133333	127.698	0
70.75	0.2	125.115	0
70.8	0.4	120.199	0
70.85	1.33333	123.749	0
70.9	0.133333	123.121	0
70.95	0	122.427	0
71	1.8	123.91
71.05	2.6	126.683
71.1	3	127.588
71.15	2.13333	121.227
71.2	0.466667	125.088	0
71.25	0.733333	125.55	0
71.3	0.066667	123.7	0
71.35	1.93333	122.228	1
71.4	3	123.156	1
71.45	2.46667	125.195	1
71.5	3	122.611	1
71.55	2.73333	124.828	1
71.6	3	125.756	1
71.65	2.8	124.328	1
71.7	2.66667	126.612	1
71.75	3	126.117	1
71.8	3	132.312	1
71.85	3	134.595	1
71.9	3	137.234	1
71.95	3	131.473	1
72	3	137.557	1

## Sheet: central_A8424
Time [hrs]	Waking [min/3min]	Bioluminescence	Wake bouts (='1') and sleep bouts (='0')
12.05	3	181.07
12.1	3	180.194
12.15	2.93333	176.741
12.2	0.6	190.577
12.25	1.2	192.701
12.3	3	177.092
12.35	0.6	131.483
12.4	3	166.097
12.45	0.8	125.621	0
12.5	1.06667	143.546	0
12.55	0.933333	142.67	0
12.6	0.333333	130.039	0
12.65	3	133.208	1
12.7	3	148.554	1
12.75	3	141.19	1
12.8	3	158.003	1
12.85	3	130.528	1
12.9	3	132.541	1
12.95	0.733333	106.91
13	2	113.012
13.05	3	128.003
13.1	2.06667	132.083
13.15	0.533333	122.163
13.2	0.933333	123.643
13.25	3	120.368
13.3	1.8	115.403
13.35	0.4	111.15
13.4	2.26667	103.452
13.45	3	131.999
13.5	3	131.279
13.55	3	138.137
13.6	3	145.661
13.65	3	139.408
13.7	3	125.443
13.75	3	139.657
13.8	3	158.403
13.85	3	163.506
13.9	3	143.386
13.95	2.66667	148.243
14	2.8	150.234
14.05	3	132.492
14.1	3	151.106
14.15	0.933333	144.541
14.2	2.53333	145.999
14.25	2.93333	134.568
14.3	0.466667	143.203
14.35	1.06667	140.439
14.4	0.933333	154.252
14.45	3	134.088
14.5	0.933333	136.19
14.55	1.06667	131.026
14.6	0.866667	138.35
14.65	1.13333	137.763
14.7	3	125.221
14.75	3	131.746
14.8	3	139.226
14.85	3	147.883
14.9	1.26667	147.119
14.95	3	146.888
15	3	148.035
15.05	1.6	157.981
15.1	0.666667	148.195
15.15	1.46667	144.919
15.2	3	130.955
15.25	0.866667	141.279
15.3	1.73333	144.515
15.35	3	140.506
15.4	3	143.564
15.45	3	164.199
15.5	3	152.657
15.55	3	152.47
15.6	3	132.839
15.65	3	144.653
15.7	3	143.244
15.75	3	139.146
15.8	3	133.537
15.85	2.93333	145.106
15.9	0.133333	137.164
15.95	2.06667	140.866
16	3	157.213
16.05	3	173.604
16.1	1.93333	158.284
16.15	0.4	139.23
16.2	0.466667	129.666
16.25	2.86667	143.19
16.3	3	145.959
16.35	1.2	153.217
16.4	0.733333	142.83
16.45	2.06667	153.022
16.5	0.133333	128.857
16.55	2.66667	128.026
16.6	3	135.217
16.65	3	164.23
16.7	1.8	158.599
16.75	0.533333	166.257
16.8	1.8	151.537
16.85	3	150.573
16.9	3	166.341
16.95	1.6	154.821
17	3	147.746
17.05	3	161.093
17.1	3	161.506
17.15	3	204.919
17.2	2.66667	173.066
17.25	0.4	144.124
17.3	1.86667	163.87
17.35	3	169.928
17.4	1.66667	154.342
17.45	1.73333	160.444
17.5	1.66667	161.168
17.55	0.6	134.87
17.6	1.73333	146.328
17.65	3	159.453
17.7	3	166.466
17.75	3	171.902
17.8	3	200.226
17.85	1.73333	181.573
17.9	1.26667	164.364
17.95	2.73333	164.022
18	1.4	186.257
18.05	1.86667	150.248
18.1	2.73333	153.395
18.15	0.933333	149.631
18.2	3	202.333
18.25	3	182.991
18.3	3	160.271
18.35	3	191.217
18.4	3	168.253
18.45	1.93333	156.266
18.5	1.2	138.657
18.55	3	196.937
18.6	3	204.351
18.65	3	176.875
18.7	1.73333	168.133
18.75	1.6	151.968
18.8	2.8	141.071
18.85	0.4	136.284
18.9	0.066667	133.786
18.95	2.93333	159.133
19	2.33333	164.813
19.05	0.333333	184.626
19.1	2.73333	152.595
19.15	2	149.208
19.2	1.2	143.844
19.25	1.93333	160.102
19.3	3	154.448
19.35	3	166.862
19.4	3	148.653
19.45	0.933333	145
19.5	1.6	150.146
19.55	3	152.871
19.6	3	146.706
19.65	0.8	174.32
19.7	0.866667	159
19.75	2.33333	140.791
19.8	3	129.604
19.85	3	142.195
19.9	3	150.231
19.95	1.73333	153.022
20	1.06667	141.369
20.05	1.66667	147.204
20.1	2.6	153.373
20.15	0.4	142.542
20.2	1.06667	155.311
20.25	1	175.324
20.3	3	139.026
20.35	0.6	159.106
20.4	1.33333	157.386
20.45	0.466667	130.889
20.5	0.266667	127.969
20.55	1.86667	134.315
20.6	3	130.151
20.65	3	145.009
20.7	0.266667	174.511
20.75	1.06667	160.48
20.8	2.53333	144.626
20.85	3	144.529
20.9	0.4	142.186
20.95	1.2	157.489
21	2.33333	131.902
21.05	3	152.004
21.1	0.4	153.551
21.15	0.333333	148.209
21.2	1	132
21.25	3	124.813
21.3	2.33333	131.915
21.35	0.866667	139.573
21.4	0.933333	137.786
21.45	0.266667	131
21.5	0.6	122.702
21.55	3	136.427
21.6	0.4	136.973
21.65	0.2	130.209
21.7	0.666667	124.822
21.75	0.466667	121.502
21.8	0.6	129.871
21.85	0.333333	137.551
21.9	0.266667	123.32
21.95	2.66667	127.467
22	2.26667	122.902
22.05	0.133333	124.76
22.1	0	127.44
22.15	1.8	123.431
22.2	3	116.867
22.25	1.26667	119.613
22.3	0.266667	120.627
22.35	1.26667	125.484
22.4	1.06667	117.298
22.45	0.066667	119.489
22.5	0.8	121.124
22.55	0.066667	119.16
22.6	0	119.618
22.65	0.666667	119.675
22.7	0.6	120.111
22.75	1.06667	118.658
22.8	2.4	111.071
22.85	3	122.196
22.9	3	119.876
22.95	0.4	120.933
23	0	115.991
23.05	1.6	119.227	1
23.1	3	123.529	1
23.15	2.13333	119.031	1
23.2	0.6	122.822	0
23.25	0.466667	121.036	0
23.3	1.06667	122.271	0
23.35	0.933333	121.462	0
23.4	0.866667	124.942	0
23.45	3	121.511
23.5	3	120.347
23.55	3	120.827
23.6	1.93333	121.173
23.65	0	116.876
23.7	0.133333	118.311
23.75	1.46667	112.28
23.8	3	105.96	1
23.85	3	119.796	1
23.9	1.66667	118.12	1
23.95	0.533333	114.933	0
24	0.266667	117.28	0
24.05	0.266667	113.894	0
24.1	0.733333	109.929	0
24.15	1.06667	116.653	0
24.2	1.33333	116.734	0
24.25	0.266667	113.858	0
24.3	0.4	115.338	0
24.35	1.66667	117.685
24.4	0.133333	115.698	0
24.45	0.2	110.622	0
24.5	0.733333	114.28	0
24.55	0.066667	110.338	0
24.6	1.53333	116.662	1
24.65	2.86667	113.742	1
24.7	2.6	117.622	1
24.75	3	105.836	1
24.8	3	111.649	1
24.85	3	115.596	1
24.9	3	120.32	1
24.95	3	118.911	1
25	3	121.191	1
25.05	3	125.249	1
25.1	2.26667	119.862	1
25.15	0.4	120.165	0
25.2	0.866667	117.689	0
25.25	0.8	119.502	0
25.3	0.2	122.627	0
25.35	0.866667	124.885	0
25.4	1.26667	127.365	0
25.45	0.266667	120.022	0
25.5	0.266667	124.391	0
25.55	0.733333	124.76	0
25.6	0.666667	124.929	0
25.65	0.933333	126.276	0
25.7	0.666667	122.289	0
25.75	3	120.347	1
25.8	3	128.538	1
25.85	2	124.24	1
25.9	0.4	121.632	0
25.95	0	119.689	0
26	0.733333	121.058	0
26.05	1.33333	116.583	0
26.1	0.6	120.907	0
26.15	0.733333	123.765	0
26.2	1.2	118.045	0
26.25	3	112.925	1
26.3	3	113.983	1
26.35	3	118.885	1
26.4	1.6	125.854	1
26.45	1.33333	121.334	0
26.5	0.4	117.103	0
26.55	1.13333	121.894	0
26.6	0.266667	121.018	0
26.65	0.266667	119.832	0
26.7	0.266667	117.378	0
26.75	0.4	116.703	0
26.8	0.533333	113.627	0
26.85	1	117.996	0
26.9	0.466667	119.009	0
26.95	0.466667	115.267	0
27	0.466667	110.458	0
27.05	0	112.227	0
27.1	0.4	115.552	0
27.15	0.2	115.187	0
27.2	0.8	113.867	0
27.25	0	113.792	0
27.3	1.13333	113.294	0
27.35	0.266667	114.996	0
27.4	0.666667	118.721	0
27.45	1	113.334	0
27.5	1.13333	110.814	0
27.55	2.73333	114.294	1
27.6	3	110.929	1
27.65	3	111.321	1
27.7	2.53333	113.378	1
27.75	0.6	110.281	0
27.8	0	109.561	0
27.85	0	107.152	0
27.9	0.466667	111.298	0
27.95	0.933333	108.201	0
28	0.4	107.614	0
28.05	0.2	110.361	0
28.1	0.6	114.974	0
28.15	1.4	109.809	0
28.2	0.333333	106.889	0
28.25	0.266667	109.303	0
28.3	0.2	108.894	0
28.35	0.466667	108.618	0
28.4	1.26667	108.01	0
28.45	0	109.356	0
28.5	0	107.458	0
28.55	1	104.738	0
28.6	0.466667	108.085	0
28.65	0.8	106.054	0
28.7	0.533333	109.334	0
28.75	0.6	105.97	0
28.8	1.26667	109.316	0
28.85	1	109.107	0
28.9	0.4	106.054	0
28.95	0.666667	109.356	0
29	0.333333	107.836	0
29.05	0.733333	102.939	0
29.1	0.866667	104.93	0
29.15	0.533333	105.676	0
29.2	0.6	105.623	0
29.25	1	108.392	0
29.3	1	101.761	0
29.35	2.33333	107.107	1
29.4	3	105.743	1
29.45	3	109.801	1
29.5	3	111.614	1
29.55	3	111.872	1
29.6	3	113.907	1
29.65	3	116.321	1
29.7	3	114.512	1
29.75	1.86667	117.125	1
29.8	0.466667	112.605	0
29.85	0.666667	115.396	0
29.9	0.4	116.854	0
29.95	0.4	112.623	0
30	1.06667	113.592	0
30.05	0.466667	114.45	0
30.1	0.4	111.552	0
30.15	0.4	113.121	0
30.2	0.133333	112.379	0
30.25	2.06667	114.725
30.3	2.8	114.361
30.35	1.66667	112.33
30.4	0.4	110.01
30.45	0.6	112.334
30.5	1.06667	111.325
30.55	0.733333	111.005
30.6	2.6	110.041
30.65	2.4	110.388
30.7	0.866667	112.823	0
30.75	0.8	109.481	0
30.8	0.4	107.472	0
30.85	1	109.174	0
30.9	0.8	113.477	0
30.95	0.6	110.556	0
31	0	110.17	0
31.05	0.533333	110.672	0
31.1	0.8	113.152	0
31.15	0.2	109.365	0
31.2	0.333333	112.868	0
31.25	0.333333	111.459	0
31.3	1.26667	112.428	0
31.35	0.466667	107.885	0
31.4	0.6	113.743	0
31.45	1.06667	109.068	0
31.5	0.8	107.659	0
31.55	1.06667	111.25	0
31.6	3	108.597	1
31.65	3	105.743	1
31.7	3	104.09	1
31.75	3	111.037	1
31.8	2	113.228	1
31.85	0.466667	111.085	0
31.9	0.866667	112.877	0
31.95	0.533333	107.912	0
32	0.8	111.37	0
32.05	0.6	113.183	0
32.1	1.06667	111.885	0
32.15	0.266667	113.299	0
32.2	0.733333	111.134	0
32.25	0.4	111.57	0
32.3	0.133333	107.361	0
32.35	3	110.508	1
32.4	3	108.232	1
32.45	3	111.868	1
32.5	3	110.192	1
32.55	2.53333	109.028	1
32.6	3	112.863	1
32.65	0.666667	110.277	0
32.7	0.6	111.001	0
32.75	0.733333	109.615	0
32.8	0	108.739	0
32.85	0.6	108.597	0
32.9	0.333333	109.943	0
32.95	0.266667	114.312	0
33	0.4	106.926	0
33.05	0.533333	108.695	0
33.1	0.733333	111.197	0
33.15	0.733333	102.788	0
33.2	2.26667	109.068
33.25	1.66667	105.837
33.3	0.666667	108.45	0
33.35	0.466667	111.33	0
33.4	0.666667	110.655	0
33.45	0.133333	109.557	0
33.5	0.333333	111.815	0
33.55	0.4	109.361	0
33.6	0.666667	112.175	0
33.65	0.2	108.632	0
33.7	2.26667	106.957	1
33.75	3	108.459	1
33.8	3	108.828	1
33.85	2.53333	108.641	1
33.9	3	100.766	1
33.95	3	101.535	1
34	3	107.837	1
34.05	2.86667	110.828	1
34.1	0.733333	111.508
34.15	0.8	109.321
34.2	0.733333	109.023
34.25	2.26667	113.592
34.3	0.4	108.339	0
34.35	0.933333	110.819	0
34.4	0.466667	109.766	0
34.45	0.466667	109.535	0
34.5	0.6	109.392	0
34.55	0.733333	109.117	0
34.6	0.333333	108.597	0
34.65	1.26667	111.988	0
34.7	0.4	110.424	0
34.75	1	111.326	0
34.8	0.733333	108.339	0
34.85	0.933333	107.73	0
34.9	0.6	108.744	0
34.95	0.333333	107.601	0
35	1.66667	109.615	1
35.05	1.93333	110.161	1
35.1	3	110.241	1
35.15	3	110.41	1
35.2	3	109.735	1
35.25	0.933333	107.081	0
35.3	0.4	111.317	0
35.35	0.466667	110.686	0
35.4	1.26667	110.788	0
35.45	2.4	108.957	1
35.5	2.66667	111.082	1
35.55	3	106.45	1
35.6	3	107.597	1
35.65	3	109.499	1
35.7	2.6	107.468	1
35.75	0.933333	109.97	0
35.8	0.266667	112.962	0
35.85	0.866667	113.686	0
35.9	0.466667	112.677	0
35.95	0.266667	114.224	0
36	0.733333	113.193	0
36.05	0.533333	116.028	0
36.1	1.86667	113.33	1
36.15	3	105.166	1
36.2	3	110.779	1
36.25	3	112.304	1
36.3	3	111.739	1
36.35	2.06667	118.242	1
36.4	0.4	110.633
36.45	2.26667	110.824
36.5	3	104.993
36.55	0.866667	110.295
36.6	0.333333	108.397
36.65	1.73333	111.744
36.7	1	113.824
36.75	1.73333	111.237
36.8	3	110.473
36.85	3	116.619
36.9	3	128.011
36.95	3	134.446
37	1.93333	131.859
37.05	0.866667	136.784
37.1	2.6	135.131
37.15	2.26667	135.655
37.2	0.733333	156.935
37.25	3	137.215
37.3	2.86667	137.584
37.35	0.866667	143.108
37.4	2.93333	133.033
37.45	1.53333	138.535
37.5	1.06667	132.704
37.55	3	137.806
37.6	0.866667	142.664
37.65	1.73333	139.877
37.7	3	138.646
37.75	2.8	145.171
37.8	3	149.117
37.85	3	150.286
37.9	3	160.299
37.95	3	168.735
38	3	153.326
38.05	2.2	148.828
38.1	1.73333	146.375
38.15	2.8	155.5
38.2	3	164.58
38.25	3	157.86
38.3	3	171.962
38.35	3	172.486
38.4	3	153.388
38.45	3	152.313
38.5	3	148.015
38.55	1.26667	151.673
38.6	1.73333	148.131
38.65	3	136.966
38.7	3	151.446
38.75	3	160.793
38.8	1.66667	151.517
38.85	3	134.931
38.9	2	149.233
38.95	1.13333	147.002
39	0.666667	152.126
39.05	3	144.962
39.1	2	155.042
39.15	1.93333	155.011
39.2	2.53333	139.024
39.25	1.26667	160.66
39.3	0.466667	134.606
39.35	2.6	138.131
39.4	3	145.211
39.45	3	176.269
39.5	3	183.949
39.55	3	173.584
39.6	3	166.086
39.65	3	181.566
39.7	3	191.446
39.75	2.93333	163.993
39.8	2.46667	156.829
39.85	2.73333	160.686
39.9	0.933333	160.366
39.95	1.93333	155.802
40	3	155.171
40.05	3	167.34
40.1	3	163.353
40.15	3	194.722
40.2	3	164.313
40.25	3	188.06
40.3	3	194.273
40.35	3	160.864
40.4	3	186.322
40.45	2.86667	166.047
40.5	3	157.371
40.55	3	161.318
40.6	3	173.887
40.65	3	192.833
40.7	3	183.602
40.75	3	187.615
40.8	2.86667	172.984
40.85	3	160.953
40.9	3	179.455
40.95	3	187.269
41	3	187.882
41.05	3	190.207
41.1	3	175.553
41.15	2.4	171.167
41.2	3	155.824
41.25	3	147.949
41.3	1.8	163.384
41.35	0.533333	148.731
41.4	2.13333	136.744
41.45	2.33333	147.113
41.5	0.4	123.282
41.55	0.2	121.807
41.6	2.73333	137.576
41.65	3	142.811
41.7	2.66667	159.691
41.75	1.26667	144.704
41.8	0.4	140.784
41.85	3	152.042
41.9	2.53333	153.256
41.95	1.93333	148.78
42	3	157.816
42.05	2.73333	157.451
42.1	0.733333	143.442
42.15	2.33333	145.922
42.2	3	154.069
42.25	3	174.416
42.3	3	167.407
42.35	3	166.531
42.4	3	155.3
42.45	0.933333	159.113
42.5	2.73333	154.482
42.55	3	146.584
42.6	3	172.309
42.65	2.6	156.345
42.7	1.13333	139.602
42.75	3	148.927
42.8	2.66667	131.851
42.85	0.6	141.02
42.9	0.666667	130.611
42.95	2.2	135.98
43	2.66667	140.882
43.05	0.933333	141.229
43.1	1	137.487
43.15	0.2	132.233
43.2	2.4	145.136
43.25	3	143.66
43.3	2.66667	152.34
43.35	0.133333	142.198
43.4	2.26667	140.5
43.45	2.4	135.491
43.5	1.66667	144.527
43.55	3	146.073
43.6	2.73333	153.709
43.65	0.333333	148.345
43.7	1.13333	145.78
43.75	3	170.816
43.8	3	164.451
43.85	1.8	150.154
43.9	1.66667	143.9
43.95	2.33333	148.225
44	0.733333	149.216
44.05	1.8	134.429
44.1	3	139.176
44.15	3	163.545
44.2	3	155.247
44.25	2.46667	153.727
44.3	3	153.051
44.35	1.53333	139.82
44.4	0.333333	131.523
44.45	0	126.891
44.5	2.86667	139.46
44.55	2.26667	136.963
44.6	0.466667	135.487
44.65	0.533333	149.123
44.7	1.86667	143.514
44.75	1.93333	141.927
44.8	1.13333	145.585
44.85	0	138.643
44.9	0.6	133.811
44.95	0.466667	126.425
45	0.4	130.305
45.05	0.4	131.34
45.1	3	132.754
45.15	2.06667	133.3
45.2	0	128.936
45.25	2.53333	132.483
45.3	2	133.474
45.35	0.4	130.887
45.4	0.4	128.989
45.45	0.933333	133.425
45.5	0.6	129.705
45.55	0.4	126.385
45.6	3	122.531
45.65	2.8	129.012
45.7	0.533333	130.958	0
45.75	1.2	127.327	0
45.8	0.4	131.363	0
45.85	1.8	128.043	1
45.9	3	128.812	1
45.95	3	135.358	1
46	2	133.194	1
46.05	3	134.207	1
46.1	2.73333	126.376	1
46.15	0.466667	136.278	0
46.2	0.266667	134.469	0
46.25	0.6	135.349	0
46.3	0.466667	144.652	0
46.35	1.4	149.732	0
46.4	1.06667	150.812	0
46.45	3	138.092	1
46.5	3	135.261	1
46.55	3	144.785	1
46.6	3	149.509	1
46.65	3	147.101	1
46.7	3	138.758	1
46.75	3	139.505	1
46.8	1.6	135.052	1
46.85	0.133333	138.754	0
46.9	0.266667	151.301	0
46.95	0.933333	142.07	0
47	0.066667	144.816	0
47.05	0.133333	138.052	0
47.1	0.466667	143.198	0
47.15	0.666667	136.012	0
47.2	2.8	134.203
47.25	1.86667	132.372
47.3	0.2	126.185
47.35	0.066667	127.998
47.4	0.266667	128.656
47.45	0.4	127.625
47.5	0.866667	128.105
47.55	1.2	126.563
47.6	3	128.243
47.65	1.73333	132.634
47.7	0.333333	132.825	0
47.75	0.333333	135.816	0
47.8	0.666667	129.496	0
47.85	1.8	128.11	1
47.9	3	124.656	1
47.95	3	128.603	1
48	3	133.394	1
48.05	3	134.407	1
48.1	3	130.665	1
48.15	3	125.834	1
48.2	3	133.358	1
48.25	3	140.527	1
48.3	3	142.541	1
48.35	3	139.932	1
48.4	3	145.967	1
48.45	3	138.647	1
48.5	3	141.461	1
48.55	3	135.23	1
48.6	0.533333	122.599	0
48.65	0.2	120.034	0
48.7	0.333333	121.936	0
48.75	0.133333	119.305	0
48.8	0.133333	121.163	0
48.85	0.6	119.221	0
48.9	0.066667	125.39	0
48.95	1.06667	124.825	0
49	0	123.216	0
49.05	0.066667	122.007	0
49.1	0	119.643	0
49.15	0.133333	125.368	0
49.2	0.466667	126.448	0
49.25	2.73333	126.572	1
49.3	3	118.541	1
49.35	3	120.332	1
49.4	3	121.145	1
49.45	3	119.292	1
49.5	2.73333	124.483	1
49.55	0.8	120.785	0
49.6	0.2	120.354	0
49.65	0.2	120.279	0
49.7	0.266667	119.248	0
49.75	0.4	120.972	0
49.8	0.8	122.452	0
49.85	0	120.977	0
49.9	0.066667	122.768	0
49.95	0.333333	118.092	0
50	0.4	119.794	0
50.05	3	118.208	1
50.1	3	123.91	1
50.15	1.66667	119.434	1
50.2	0.066667	118.737	0
50.25	0.066667	119.016	0
50.3	0.133333	118.452	0
50.35	1.33333	121.732	0
50.4	0.6	119.856	0
50.45	0.133333	117.003	0
50.5	0.533333	115.594	0
50.55	0.133333	120.652	0
50.6	0.8	116.043	0
50.65	0.2	122.679	0
50.7	0.6	112.959	0
50.75	0.266667	120.061	0
50.8	0.466667	118.452	0
50.85	0.8	115.332	0
50.9	0.066667	118.368	0
50.95	1.4	116.626	0
51	3	122.617
51.05	3	118.763
51.1	1.46667	114.31	0
51.15	0	111.99	0
51.2	0.933333	115.07	0
51.25	0.266667	116.594	0
51.3	0.133333	118.986	0
51.35	1	117.31	0
51.4	0.133333	116.945	0
51.45	0.733333	114.181	0
51.5	0.066667	113.417	0
51.55	0.666667	114.519	0
51.6	0.8	113.31	0
51.65	0.466667	117.079	0
51.7	0.733333	121.07	0
51.75	0.2	118.306	0
51.8	0.133333	115.63	0
51.85	0.066667	118.199	0
51.9	0.933333	116.568	0
51.95	1.2	113.937	0
52	0.733333	114.061	0
52.05	2.66667	116.63	1
52.1	3	114.466	1
52.15	3	116.079	1
52.2	3	115.137	1
52.25	3	116.594	1
52.3	3	114.43	1
52.35	3	119.088	1
52.4	3	111.812	1
52.45	3	111.603	1
52.5	3	114.017	1
52.55	3	113.563	1
52.6	0.866667	114.288	0
52.65	0.333333	115.746	0
52.7	0.8	113.603	0
52.75	0.666667	117.128	0
52.8	0.533333	113.008	0
52.85	0.533333	113.91	0
52.9	0.2	111.635	0
52.95	0.2	111.026	0
53	1	111.395	0
53.05	0.6	118.408	0
53.1	0.666667	115.466	0
53.15	0.933333	114.701	0
53.2	0.2	116.137	0
53.25	0.666667	115.372	0
53.3	0.4	113.141	0
53.35	0.6	110.888	0
53.4	3	115.346	1
53.45	3	112.403	1
53.5	1.53333	112.595	1
53.55	2.46667	115.297	1
53.6	1.6	113.644	1
53.65	0.666667	112.279	0
53.7	0.6	112.27	0
53.75	1.2	111.506	0
53.8	0.133333	111.03	0
53.85	1.2	110.621	0
53.9	0.466667	117.457	0
53.95	1.26667	112.404	0
54	0.133333	112.484	0
54.05	0.066667	113.408	0
54.1	0.066667	111.577	0
54.15	0.2	113.946	0
54.2	0.666667	111.759	0
54.25	1	110.795	0
54.3	0.866667	115.03	0
54.35	0.933333	108.844	0
54.4	1.53333	111.724
54.45	1.6	112.915
54.5	0.6	110.395
54.55	1.66667	111.942	1
54.6	3	112.555	1
54.65	3	111.857	1
54.7	3	114.981	1
54.75	3	108.995	1
54.8	3	109.675	1
54.85	3	112.51	1
54.9	3	109.79	1
54.95	3	113.093	1
55	3	114.884	1
55.05	3	115.319	1
55.1	3	115.288	1
55.15	3	114.768	1
55.2	1.2	112.626	0
55.25	0.866667	111.217	0
55.3	0.066667	112.053	0
55.35	0.4	109.799	0
55.4	0.6	113.346	0
55.45	0.2	110.87	0
55.5	1.13333	111.639	0
55.55	0.533333	113.519	0
55.6	0.066667	108.599	0
55.65	1.33333	110.99	0
55.7	0.466667	109.737	0
55.75	0.533333	111.751	0
55.8	0.133333	111.942	0
55.85	1.4	109.266	0
55.9	0.866667	110.946	0
55.95	1.06667	108.182	0
56	0.466667	110.084	0
56.05	0.733333	111.119	0
56.1	0.666667	112.488	0
56.15	2.6	112.746	1
56.2	3	114.048	1
56.25	3	112.039	1
56.3	3	112.43	1
56.35	3	108.822	1
56.4	1.33333	109.191	0
56.45	0.4	112.426	0
56.5	0.6	112.151	0
56.55	1.06667	110.342	0
56.6	0.6	108.777	0
56.65	0.866667	108.768	0
56.7	0.533333	106.737	0
56.75	0.8	106.906	0
56.8	0.266667	105.564	0
56.85	0.533333	108.044	0
56.9	0.933333	114.68	0
56.95	1.33333	108.559	0
57	0.333333	110.817	0
57.05	1	105.097	0
57.1	0.733333	107.666	0
57.15	0	108.946	0
57.2	1.2	108.871	0
57.25	0.533333	106.351	0
57.3	0.266667	105.275	0
57.35	0.333333	109.444	0
57.4	0.133333	110.391	0
57.45	0.066667	106.204	0
57.5	2.53333	104.795	1
57.55	3	107.342	1
57.6	2.8	112.177	1
57.65	2.6	105.791	1
57.7	3	106.915	1
57.75	2.26667	108.884	1
57.8	0.333333	106.475	0
57.85	0.466667	105.466	0
57.9	0.133333	104.102	0
57.95	0.666667	106.16	0
58	0.6	107.662	0
58.05	0.533333	106.475	0
58.1	0.666667	103.444	0
58.15	0.4	103.68	0
58.2	0.666667	107.271	0
58.25	0	105.062	0
58.3	0.933333	106.142	0
58.35	0.133333	103.666	0
58.4	0.066667	100.702	0
58.45	1.4	107.226	0
58.5	0.6	105.995	0
58.55	0.2	104.297	0
58.6	0.866667	107.933	0
58.65	0.133333	104.302	0
58.7	0.6	106.515	0
58.75	0.4	104.418	0
58.8	0.466667	104.231	0
58.85	0.866667	106.333	0
58.9	0.333333	102.657	0
58.95	0.933333	105.982	0
59	0.533333	101.795	0
59.05	0.533333	103.742	0
59.1	0.533333	105.044	0
59.15	0.8	104.302	0
59.2	0.266667	108.449	0
59.25	1.26667	107.618	0
59.3	3	106.031	1
59.35	3	103.511	1
59.4	3	103.213	1
59.45	3	106.449	1
59.5	3	101.573	1
59.55	3	104.542	1
59.6	0.8	104.4	0
59.65	0.266667	104.702	0
59.7	0.133333	105.626	0
59.75	1	105.173	0
59.8	0.2	105.831	0
59.85	0.266667	107.311	0
59.9	0.733333	107.191	0
59.95	0.8	108.382	0
60	0.6	106.751	0
60.05	0.533333	102.809	0
60.1	1.33333	104.8	0
60.15	0.733333	107.635	0
60.2	2.13333	105.715	1
60.25	3	101.862	1
60.3	3	104.453	1
60.35	3	105.578	1
60.4	3	105.724	1
60.45	3	107.427	1
60.5	2.93333	109.062	1
60.55	0.466667	110.076
60.6	0.533333	107.8
60.65	3	118.436
60.7	3	119.849
60.75	1.33333	114.195
60.8	0.4	113.587
60.85	0.933333	125.778
60.9	2.06667	124.169
60.95	1.66667	124.671
61	3	114.996
61.05	1.93333	121.409
61.1	0.666667	123.333
61.15	3	112.591
61.2	1.4	110.449
61.25	1.93333	114.684
61.3	2.06667	116.609
61.35	1.26667	114.245
61.4	3	116.858
61.45	2.26667	128.76
61.5	0.933333	125.24
61.55	2.26667	123.409
61.6	1.66667	126.156
61.65	2.06667	133.547
61.7	1.8	129.027
61.75	0.4	121.04
61.8	2.33333	133.187
61.85	3	151.978
61.9	3	133.436
61.95	3	141.538
62	2.46667	145.507
62.05	2	132.031
62.1	2.4	142.889
62.15	3	146.125
62.2	3	172.871
62.25	2.66667	141.618
62.3	3	152.476
62.35	1.73333	137.845
62.4	0.933333	136.258
62.45	3	136.738
62.5	0.933333	142.396
62.55	3	137.565
62.6	2.33333	143.445
62.65	1.86667	143.613
62.7	2.2	138.338
62.75	3	133.996
62.8	2.26667	140.254
62.85	2.4	139.267
62.9	0.666667	149.836
62.95	3	149.005
63	3	183.462
63.05	2.86667	169.609
63.1	2.33333	163.045
63.15	3	171.569
63.2	2.33333	160.049
63.25	2.33333	149.018
63.3	3	144.476
63.35	3	168.956
63.4	3	173.058
63.45	2.66667	157.027
63.5	2.46667	146.729
63.55	2.6	138.009
63.6	2	143.711
63.65	2.06667	152.391
63.7	3	158.805
63.75	1.06667	150.485
63.8	2.6	147.92
63.85	2.73333	156.067
63.9	1.4	150.636
63.95	2.86667	146.316
64	3	144.818
64.05	3	159.943
64.1	3	175.734
64.15	2.73333	159.858
64.2	3	160.938
64.25	3	180.529
64.3	3	153.409
64.35	1.8	163.689
64.4	3	153.903
64.45	2.53333	151.272
64.5	1	139.863
64.55	2.86667	138.454
64.6	2.26667	149.4
64.65	3	147.569
64.7	1.93333	152.494
64.75	1.46667	150.063
64.8	1.2	140.076
64.85	1.53333	136.534
64.9	3	137.547
64.95	3	148.916
65	2.33333	153.307
65.05	1.33333	139.209
65.1	2.2	153.601
65.15	2.53333	148.636
65.2	1.2	150.472
65.25	3	143.974
65.3	3	167.698
65.35	3	177.356
65.4	2.2	147.547
65.45	3	157.072
65.5	3	169.618
65.55	1.93333	174.365
65.6	0.666667	139.112
65.65	2.06667	136.169
65.7	3	161.049
65.75	2.86667	156.129
65.8	2.46667	148.476
65.85	2.06667	155.423
65.9	0.533333	161.503
65.95	3	150.161
66	2.86667	141.841
66.05	0.933333	140.054
66.1	3	143.956
66.15	3	160.481
66.2	1.53333	142.672
66.25	1.13333	150.796
66.3	2.73333	145.054
66.35	2.93333	151.378
66.4	3	153.592
66.45	0.8	150.161
66.5	2.53333	166.996
66.55	3	186.943
66.6	3	191.245
66.65	3	210.081
66.7	3	196.672
66.75	3	173.552
66.8	3	167.41
66.85	3	177.512
66.9	3	166.858
66.95	3	165.761
67	3	164.796
67.05	3	160.054
67.1	2.26667	149.334
67.15	0.333333	135.192
67.2	1.8	144.583
67.25	3	148.796
67.3	3	167.454
67.35	2.73333	165.267
67.4	1.53333	155.725
67.45	3	140.494
67.5	3	155.619
67.55	1.13333	136.41
67.6	0.533333	137.067
67.65	1.33333	147.747
67.7	3	142.605
67.75	1.8	145.485
67.8	0.2	133.81
67.85	0.466667	149.534
67.9	1.53333	155.859
67.95	0.466667	145.516
68	2.2	143.085
68.05	2.13333	146.588
68.1	0.4	131.579
68.15	0.066667	149.392
68.2	0.666667	151.761
68.25	2.06667	151.219
68.3	2.06667	144.81
68.35	0.466667	134.512
68.4	0.666667	129.992
68.45	3	142.916
68.5	3	153.774
68.55	1.2	149.521
68.6	1.86667	142.756
68.65	1.2	139.659
68.7	1.46667	143.072
68.75	3	136.996
68.8	3	150.721
68.85	3	152.801
68.9	1.6	150.948
68.95	0.466667	134.65
69	2.46667	141.041
69.05	3	147.965
69.1	0.333333	159.534
69.15	0.4	143.881
69.2	1.2	145.339
69.25	1.06667	138.885
69.3	1.4	153.565
69.35	3	145.934
69.4	3	156.259
69.45	3	147.672
69.5	0.4	151.174
69.55	0.866667	158.854
69.6	3	145.223
69.65	3	146.214
69.7	0.2	135.716
69.75	0.933333	142.108
69.8	0.4	138.432
69.85	0.733333	148.934
69.9	0.6	149.503
69.95	0.666667	144.783
70	0.2	144.486
70.05	0.333333	153.721
70.1	0.133333	140.845
70.15	1.66667	140.548
70.2	3	131.583
70.25	1.46667	137.774
70.3	0.466667	129.543
70.35	0.666667	135.001
70.4	1.46667	136.303
70.45	2.8	140.45
70.5	0.866667	128.197
70.55	0.066667	135.543
70.6	2.86667	136.845
70.65	2.86667	136.192
70.7	2.4	135.672
70.75	3	140.508
70.8	3	146.832
70.85	2.46667	146.023
70.9	3	138.815
70.95	2.2	158.961
71	0.6	158.375
71.05	0.533333	153.588
71.1	1	142.779
71.15	2.4	144.348	1
71.2	3	143.806	1
71.25	1.86667	149.53	1
71.3	1.46667	157.588	0
71.35	0.866667	142.468	0
71.4	0.466667	147.214	0
71.45	0.4	141.695	0
71.5	0.8	145.663	0
71.55	1.06667	150.299	0
71.6	0.4	138.135	0
71.65	0.466667	151.281	0
71.7	0.666667	142.472	0
71.75	3	141.641	1
71.8	3	136.366	1
71.85	3	139.935	1
71.9	3	144.192	1
71.95	3	141.317	1
72	3	144.663

## Sheet: central_A9521
Time [hrs]	Waking [min/3min]	Bioluminescence	Wake bouts (='1') and sleep bouts (='0')
12.05	0.133333	155.733
12.1	0.733333	159.042
12.15	1.73333	153.529	1
12.2	3	157.749	1
12.25	3	143.169	1
12.3	3	138.678	1
12.35	0.533333	133.498	0
12.4	0.666667	128.696	0
12.45	0.066667	129.049	0
12.5	1.06667	127.647	0
12.55	0.666667	125.623	0
12.6	1.2	123.399	0
12.65	0.066667	120.73	0
12.7	2.33333	134.817	1
12.75	3	137.726	1
12.8	3	149.613	1
12.85	1.4	147.299	0
12.9	0.533333	131.764	0
12.95	0.2	132.384	0
13	0.466667	128.204	0
13.05	0.933333	129.602	0
13.1	3	126.089
13.15	2.06667	129.598
13.2	0.266667	129.952
13.25	0.933333	127.394
13.3	0.866667	131.77
13.35	3	128.945
13.4	3	140.01
13.45	3	140.008
13.5	1.53333	139.628
13.55	1.46667	151.626
13.6	2.66667	159.779
13.65	0.466667	159.755
13.7	0.733333	154.086
13.75	1.33333	151.973
13.8	2.6	159.838
13.85	0.6	157.436
13.9	0.866667	163.634
13.95	2.6	163.031
14	3	143.696
14.05	3	148.05
14.1	3	161.981
14.15	3	181.957
14.2	2.6	170.088
14.25	0.6	164.175
14.3	0.933333	174.061
14.35	3	158.726
14.4	0.4	161.768
14.45	1.06667	170.3
14.5	0.666667	160.164
14.55	2.66667	166.273
14.6	3	151.827
14.65	3	159.291
14.7	2.53333	153.245
14.75	0.4	156.154
14.8	2.26667	147.107
14.85	3	150.639
14.9	0.6	146.637	0
14.95	0.733333	153.635	0
15	0.266667	152.744	0
15.05	3	150.453	1
15.1	3	152.362	1
15.15	3	155.16	1
15.2	3	158.38	1
15.25	3	155.667	1
15.3	2.8	149.553	1
15.35	3	144.996	1
15.4	3	168.349	1
15.45	3	149.48	1
15.5	1.13333	150.878
15.55	1.73333	163.032
15.6	3	182.83
15.65	0.933333	160.45
15.7	3	156.226
15.75	3	171.29
15.8	2.8	142.533
15.85	0.466667	137.108
15.9	0.266667	135.639
15.95	0.333333	130.126
16	1.4	139.324
16.05	3	137.055
16.1	1.66667	133.165
16.15	0.533333	125.607
16.2	0.066667	120.249
16.25	0.666667	112.714
16.3	1.8	119.112
16.35	0.266667	114.665
16.4	1.73333	115.263
16.45	1.66667	115.15
16.5	0.533333	111.77
16.55	0.533333	116.59
16.6	0.4	112.611
16.65	0.933333	114.253
16.7	0.266667	111.517
16.75	0.4	110.404
16.8	3	112.091
16.85	3	113.422
16.9	3	116.154
16.95	2.2	121.129
17	0.8	120.927
17.05	1.73333	129.014
17.1	3	143.034
17.15	3	139.588
17.2	3	150.786
17.25	3	154.028
17.3	0.933333	146.559
17.35	2.8	157.313
17.4	2.86667	164.977
17.45	0.266667	153.064
17.5	2.13333	164.973
17.55	3	163.171
17.6	0.466667	157.547
17.65	0.066667	170.123
17.7	1.06667	172.409
17.75	1.13333	157.474
17.8	1	153.494
17.85	3	149.314
17.9	0.733333	141.957	0
17.95	0.733333	145.71	0
18	0.866667	135.064	0
18.05	3	134.572	1
18.1	3	131.659	1
18.15	3	132.657	1
18.2	3	152.855	1
18.25	3	142.253	1
18.3	3	151.629	1
18.35	3	135.582	1
18.4	3	153.669	1
18.45	3	156.245	1
18.5	2.66667	150.732	1
18.55	2.2	149.663	1
18.6	1.53333	136.75	1
18.65	1.8	141.303	1
18.7	0.866667	152.59
18.75	0	162.832
18.8	1.6	143.164	1
18.85	3	132.473	1
18.9	3	122.293	1
18.95	0.533333	124.668	0
19	0	124.578	0
19.05	1	121.82	0
19.1	0.8	119.996	0
19.15	0.333333	119.882	0
19.2	0.6	117.68	0
19.25	0.4	115.767	0
19.3	0.533333	114.743	0
19.35	0.133333	111.23	0
19.4	0.333333	106.983	0
19.45	0.066667	111.337	0
19.5	0.2	112.468	0
19.55	0.466667	111.866	0
19.6	3	110.353
19.65	0.6	112.862
19.7	0.2	110.593
19.75	0.2	111.924
19.8	1.93333	112.255
19.85	3	112.698
19.9	2.53333	110.362
19.95	0.2	115.583
20	2.93333	118.18	1
20.05	3	126.734	1
20.1	3	127.31	1
20.15	3	136.797	1
20.2	3	136.794	1
20.25	3	144.637	1
20.3	3	156.012	1
20.35	3	148.255	1
20.4	3	152.586	1
20.45	3	160.517	1
20.5	3	174.515	1
20.55	2.4	180.069	1
20.6	0.2	191.067	0
20.65	0.266667	179.665	0
20.7	0.733333	161.529	0
20.75	0	156.283	0
20.8	0.6	147.103	0
20.85	0.4	140.234	0
20.9	1.06667	148.165	0
20.95	0.866667	132.541	0
21	0.133333	123.984	0
21.05	0	118.026	0
21.1	0.866667	127.379	0
21.15	0.066667	120.777	0
21.2	0.2	118.686	0
21.25	0.066667	116.395	0
21.3	0.333333	116.171	0
21.35	0.266667	117.413	0
21.4	0.066667	112.567	0
21.45	0.066667	118.52	0
21.5	0.4	111.496	0
21.55	0	109.183	0
21.6	2.86667	114.536
21.65	3	105.09
21.7	0.8	113.532
21.75	0.4	110.041
21.8	0.733333	108.217
21.85	0.6	110.459
21.9	0.333333	112.502
21.95	0.333333	110.455
22	0.333333	107.031
22.05	1.6	106.296
22.1	0.466667	107.271
22.15	0.266667	108.336
22.2	3	110.845
22.25	3	107.576
22.3	3	105.507
22.35	1.93333	107.75
22.4	0.4	114.237
22.45	0.066667	115.546
22.5	2.46667	111.944
22.55	3	111.119
22.6	2.53333	118.428
22.65	2.2	123.893
22.7	0.933333	124.691
22.75	3	128.355
22.8	0.866667	127.553
22.85	0.333333	125.996
22.9	2.86667	138.482
22.95	2.4	124.236
23	0.266667	120.3	0
23.05	0.133333	116.254	0
23.1	0.6	118.363	0
23.15	0.333333	118.361	0
23.2	1.13333	116.692	0
23.25	0.266667	118.535	0
23.3	0.066667	116.066	0
23.35	3	114.953	1
23.4	3	117.039	1
23.45	3	119.549	1
23.5	3	113.902	1
23.55	3	122.678	1
23.6	3	136.764	1
23.65	3	133.274	1
23.7	3	138.938	1
23.75	0.466667	129.514	0
23.8	0.133333	122.156	0
23.85	0.2	123.732	0
23.9	0.266667	125.463	0
23.95	0.4	121.217	0
24	1.53333	132.615
24.05	0.866667	137.679	0
24.1	0.466667	128.455	0
24.15	0.133333	117.497	0
24.2	0.8	119.117	0
24.25	0.2	119.849	0
24.3	0.2	109.224	0
24.35	0.2	115.245	0
24.4	1	116.065	0
24.45	0.8	116.285	0
24.5	0.4	111.972	0
24.55	1.4	114.081	0
24.6	0.6	113.056	0
24.65	0.133333	112.232	0
24.7	0.133333	112.83	0
24.75	0.733333	110.25	0
24.8	0.6	110.648	0
24.85	0.066667	113.113	0
24.9	1	111.422	0
24.95	0.133333	110.886	0
25	0	113.573	0
25.05	0.133333	111.104	0
25.1	0.333333	113.525	0
25.15	2.8	112.3	1
25.2	2.46667	113.431	1
25.25	3	113.185	1
25.3	2.6	109.65	1
25.35	2.86667	112.981	1
25.4	3	119.845	1
25.45	3	119.577	1
25.5	3	118.552	1
25.55	3	116.039	1
25.6	3	121.726	1
25.65	3	123.657	1
25.7	3	126.344	1
25.75	2.53333	124.964	1
25.8	0.8	132.473	0
25.85	0.133333	125.027	0
25.9	0.266667	120.847	0
25.95	0.533333	116.911	0
26	0.2	112.509	0
26.05	0.133333	118.685	0
26.1	1.06667	113.305	0
26.15	0.466667	114.037	0
26.2	0.333333	116.834	0
26.25	0.466667	111.143	0
26.3	0.133333	112.252	0
26.35	0.533333	110.806	0
26.4	0.666667	113.982	0
26.45	0.2	110.602	0
26.5	1.06667	111.555	0
26.55	0.133333	110.375	0
26.6	0.266667	108.218	0
26.65	0.333333	111.771	0
26.7	0.533333	110.191	0
26.75	0.133333	109.567	0
26.8	0.266667	110.921	0
26.85	0.6	104.541	0
26.9	0	113.028	0
26.95	0.466667	107.203	0
27	1.33333	108.779	0
27.05	3	109.599	1
27.1	3	102.464	1
27.15	3	108.728	1
27.2	3	112.482	1
27.25	3	111.102	1
27.3	3	117.144	1
27.35	0.8	118.498
27.4	0	109.474
27.45	0.266667	113.294
27.5	1.33333	115.047
27.55	2.86667	118.645
27.6	1.33333	117.287	0
27.65	0.333333	111.774	0
27.7	0.266667	111.217	0
27.75	0.2	111.548	0
27.8	0.066667	108.59	0
27.85	0.4	109.21	0
27.9	0.466667	108.808	0
27.95	0.333333	107.028	0
28	0.6	110.449	0
28.05	0.8	105.602	0
28.1	0.6	107.511	0
28.15	0.2	108.331	0
28.2	0.666667	108.84	0
28.25	1.26667	109.816	0
28.3	0.533333	105.57	0
28.35	1.06667	109.123	0
28.4	0.733333	107.121	0
28.45	0.733333	106.763	0
28.5	0.066667	107.894	0
28.55	0.533333	105.715	0
28.6	0.2	107.246	0
28.65	0.6	108.066	0
28.7	3	110.664	1
28.75	3	107.751	1
28.8	3	107.038	1
28.85	3	108.147	1
28.9	3	108.834	1
28.95	3	119.743	1
29	3	120.163	1
29.05	3	120.627	1
29.1	2.66667	126.914	1
29.15	0.266667	117.379	0
29.2	0.2	118.288	0
29.25	0.066667	114.441	0
29.3	0.266667	117.572	0
29.35	0.266667	118.415	0
29.4	0.466667	109.857	0
29.45	0.266667	115.211	0
29.5	1.6	114.586
29.55	1.33333	117.251
29.6	0.333333	113.782
29.65	0.266667	114.18
29.7	0.333333	107.645
29.75	0.266667	113.531
29.8	0.8	113.818
29.85	0.133333	112.372
29.9	0.266667	112.748
29.95	0.8	110.657
30	2.26667	113.121
30.05	3	112.875
30.1	3	110.561
30.15	3	112.759
30.2	1.4	119.135
30.25	3	120.555	1
30.3	3	125.886	1
30.35	3	121.707	1
30.4	2.86667	122.905	1
30.45	1.8	125.925	1
30.5	0.133333	123.256	0
30.55	0.066667	124.565	0
30.6	0.866667	124.652	0
30.65	0.6	133.139	0
30.7	0.133333	134.048	0
30.75	0.133333	131.09	0
30.8	0.4	134.31	0
30.85	0.133333	133.597	0
30.9	0.4	123.995	0
30.95	0.2	126.393	0
31	0.533333	120.213	0
31.05	0.866667	123.033	0
31.1	2.6	114.853
31.15	0.2	119.851
31.2	0.466667	115.16
31.25	1.06667	123.403
31.3	0	115.623
31.35	0.533333	112.799
31.4	0.333333	110.174
31.45	0.266667	112.461
31.5	0.6	110.881
31.55	0.333333	113.501
31.6	1.26667	112.944
31.65	0.133333	110.919
31.7	0.933333	108.851
31.75	2.73333	113.249
31.8	0.133333	108.758	0
31.85	0.066667	110.8	0
31.9	0.933333	113.042	0
31.95	0.666667	112.396	0
32	1.06667	111.305	0
32.05	0.533333	106.658	0
32.1	1.46667	111.079	0
32.15	1.73333	110.543	1
32.2	3	113.23	1
32.25	3	108.317	1
32.3	3	122.226	1
32.35	3	123.246	1
32.4	3	129.577	1
32.45	3	131.931	1
32.5	1	121.684	0
32.55	0.6	125.215	0
32.6	0.666667	123.702	0
32.65	0.8	128.411	0
32.7	0.4	127.987	0
32.75	0.6	124.407	0
32.8	0.6	127.494	0
32.85	0.133333	113.959	0
32.9	0.133333	118.29	0
32.95	0.533333	117.376	0
33	2.06667	118.819	1
33.05	2.8	116.861	1
33.1	3	117.192	1
33.15	3	114.124	1
33.2	3	121.833	1
33.25	0.666667	117.964	0
33.3	0.666667	117.14	0
33.35	0.4	119.049	0
33.4	0.333333	119.158	0
33.45	0.533333	118.267	0
33.5	0.4	129.176	0
33.55	0.333333	123.796	0
33.6	0.266667	120.261	0
33.65	1.6	123.014
33.7	0.8	117.901	0
33.75	0.466667	119.121	0
33.8	0.8	115.808	0
33.85	0.266667	106.628	0
33.9	0.6	112.182	0
33.95	0.666667	115.268	0
34	1.86667	113.311	1
34.05	3	113.686	1
34.1	3	109.929	1
34.15	3	108.704	1
34.2	2.6	116.48	1
34.25	0.133333	115.256	0
34.3	0.466667	116.898	0
34.35	0.4	112.452	0
34.4	0.4	110.739	0
34.45	0	112.092	0
34.5	0.4	114.957	0
34.55	1.06667	114.155	0
34.6	0.266667	114.153	0
34.65	0.4	109.795	0
34.7	0.133333	106.993	0
34.75	2.66667	111.657	1
34.8	3	113.122	1
34.85	3	114.298	1
34.9	3	111.696	1
34.95	2.06667	118.449	1
35	1.8	122.803	1
35.05	1.66667	123.423	1
35.1	0.133333	120.621	0
35.15	0.133333	122.863	0
35.2	0.266667	123.039	0
35.25	1.06667	135.992	0
35.3	0.466667	131.057	0
35.35	0.133333	119.433	0
35.4	0.133333	119.186	0
35.45	0.2	120.873	0
35.5	0.266667	120.804	0
35.55	0.866667	120.735	0
35.6	0.4	112.822	0
35.65	2.53333	121.62	1
35.7	3	123.462	1
35.75	3	119.105	1
35.8	3	118.458	1
35.85	1.06667	118.456	0
35.9	0.133333	120.61	0
35.95	0.266667	124.341	0
36	1.06667	141.561	0
36.05	0.4	125.492	0
36.1	2.33333	135.424
36.15	3	135.444
36.2	3	133.908
36.25	2	140.262
36.3	0.866667	138.438
36.35	1.86667	132.302
36.4	3	133.611
36.45	2.6	137.142
36.5	0.266667	135.607
36.55	1	144.849
36.6	2.26667	146.736
36.65	1.06667	136.156
36.7	2.46667	148.421
36.75	2.86667	149.619
36.8	0.666667	147.661
36.85	3	154.659
36.9	3	156.146
36.95	3	171.522
37	2.66667	165.231
37.05	0.266667	161.695
37.1	2.93333	149.227
37.15	2.33333	191.402
37.2	1.53333	205
37.25	3	170.998
37.3	3	181.885
37.35	3	195.016
37.4	3	174.236
37.45	3	182.034
37.5	1.33333	156.188
37.55	1.53333	164.564
37.6	1.53333	158.028
37.65	0.4	142.381
37.7	1.53333	157.091
37.75	2.26667	151.311
37.8	1.33333	157.064
37.85	2.46667	154.129
37.9	0.8	153.127
37.95	2.06667	148.68
38	0.8	140.367
38.05	0.733333	127.32
38.1	1.06667	122.23
38.15	0.933333	127.627
38.2	2	123.025
38.25	2	135.312
38.3	2.4	127.532
38.35	1.26667	127.908
38.4	1.8	129.128
38.45	1.46667	129.415
38.5	1.93333	132.746
38.55	1.46667	132.877
38.6	2.13333	138.253
38.65	3	137.629
38.7	3	157.249
38.75	3	186.447
38.8	3	181.956
38.85	3	187.065
38.9	3	189.396
38.95	3	189.505
39	3	173.014
39.05	1.73333	175.301
39.1	1	161.166
39.15	3	146.453
39.2	1.86667	166.762
39.25	1	150.315
39.3	3	133.402
39.35	1.2	156.2	0
39.4	1	154.953	0
39.45	0.6	146.196	0
39.5	2.86667	145.46	1
39.55	3	156.436	1
39.6	3	140.656	1
39.65	3	150.943	1
39.7	3	149.941	1
39.75	3	142.028	1
39.8	3	131.181	1
39.85	2.53333	133.113	1
39.9	3	142.444	1
39.95	3	136.442	1
40	2.66667	141.084	1
40.05	1	141.904
40.1	2.86667	138.902
40.15	3	133.589
40.2	1.13333	144.365	0
40.25	0.6	148.651	0
40.3	0.6	143.138	0
40.35	0.333333	126.981	0
40.4	1.26667	130.89	0
40.45	3	124.11	1
40.5	2.46667	121.819	1
40.55	3	121.706	1
40.6	3	119.281	1
40.65	3	120.19	1
40.7	3	129.099	1
40.75	3	126.253	1
40.8	3	133.029	1
40.85	3	134.915	1
40.9	1.06667	123.558
40.95	1.46667	131.489
41	3	138.331
41.05	1.6	129.485
41.1	0.266667	130.816
41.15	0.133333	131.747
41.2	0.933333	126.59
41.25	3	119.299
41.3	3	122.008
41.35	1.06667	117.584
41.4	1.66667	115.981
41.45	3	115.335
41.5	0.933333	113.155
41.55	0.133333	115.131
41.6	0.533333	113.729
41.65	1.26667	114.393
41.7	3	111.458	1
41.75	2.73333	110.211	1
41.8	2.2	111.009	1
41.85	1.2	112.607	1
41.9	0.333333	112.916	0
41.95	0	111.425	0
42	1	111.89	0
42.05	0.2	110.132	0
42.1	0.8	112.797	0
42.15	0.333333	111.128	0
42.2	0.466667	111.548	0
42.25	2.2	109.902
42.3	3	112.078
42.35	0.533333	111.587	0
42.4	0.333333	110.296	0
42.45	0.733333	110.138	0
42.5	0.6	111.536	0
42.55	2.53333	110.112	1
42.6	3	110.487	1
42.65	3	115.596	1
42.7	3	120.261	1
42.75	3	125.259	1
42.8	3	133.701	1
42.85	3	136.81	1
42.9	1.33333	141.83
42.95	2.06667	154.828
43	2.86667	159.626
43.05	0.466667	155.491
43.1	0.733333	152.622
43.15	0.533333	189.82
43.2	0.066667	171.507
43.25	1.93333	176.727
43.3	0.866667	163.014	0
43.35	1.4	159.123	0
43.4	0.6	154.587	0
43.45	0.8	142.785	0
43.5	0.733333	141.161	0
43.55	0.466667	142.848	0
43.6	0.533333	131.423	0
43.65	3	143.422	1
43.7	3	129.93	1
43.75	3	135.817	1
43.8	3	128.238	1
43.85	3	133.191	1
43.9	3	134.211	1
43.95	3	126.409	1
44	3	131.74	1
44.05	1.46667	150.672
44.1	1.2	158.403
44.15	3	130.978
44.2	1.2	135.243
44.25	0.4	143.797
44.3	2.66667	137.572	1
44.35	3	123.659	1
44.4	3	123.59	1
44.45	2.53333	113.477	1
44.5	2	118.986	1
44.55	0.4	112.962	0
44.6	0.066667	109.493	0
44.65	0.066667	110.135	0
44.7	1.2	114.645	0
44.75	0.266667	109.509	0
44.8	0.2	111.129	0
44.85	0.6	113.061	0
44.9	0.133333	110.636	0
44.95	0.666667	108.767	0
45	0.533333	109.01	0
45.05	2.26667	111.186	1
45.1	3	111.584	1
45.15	3	104.915	1
45.2	3	109.957	1
45.25	3	109.288	1
45.3	3	113.709	1
45.35	1.06667	134.529	0
45.4	0.466667	159.66	0
45.45	1.46667	173.191	0
45.5	1.06667	175.811	0
45.55	0.6	152.365	0
45.6	0.2	138.985	0
45.65	0.733333	141.694	0
45.7	0.133333	136.225	0
45.75	0.133333	132.49	0
45.8	0.6	136.355	0
45.85	3	161.197	1
45.9	2.13333	154.75	1
45.95	3	145.148	1
46	3	145.991	1
46.05	3	136.3	1
46.1	3	148.209	1
46.15	2.73333	130.207	1
46.2	3	119.027	1
46.25	0.666667	129.536	0
46.3	0.466667	120.778	0
46.35	0.466667	110.554	0
46.4	0.266667	114.174	0
46.45	0.2	112.083	0
46.5	0.133333	112.059	0
46.55	0.733333	112.568	0
46.6	0.066667	114.077	0
46.65	0.266667	111.386	0
46.7	0.8	111.962	0
46.75	0.333333	110.093	0
46.8	0.133333	110.446	0
46.85	2.6	110.355
46.9	3	113.731
46.95	3	106.707
47	2.13333	106.683
47.05	0.266667	109.791	0
47.1	0.466667	114.167	0
47.15	0.8	106.61	0
47.2	0.466667	110.474	0
47.25	3	108.405	1
47.3	3	109.048	1
47.35	3	113.69	1
47.4	3	107.021	1
47.45	3	110.997	1
47.5	3	113.528	1
47.55	2.46667	118.26	1
47.6	2.13333	114.746	1
47.65	0.4	113.633	0
47.7	0.733333	115.898	0
47.75	0.4	114.496	0
47.8	0.4	113.072	0
47.85	0.866667	114.136	0
47.9	0.733333	106.845	0
47.95	0.266667	110.665	0
48	0.733333	111.019	0
48.05	0	106.817	0
48.1	1.53333	108.081	1
48.15	3	108.39	1
48.2	3	109.455	1
48.25	3	105.853	1
48.3	1.93333	108.34	1
48.35	0.266667	111.049	0
48.4	0.133333	109.491	0
48.45	0.133333	106.644	0
48.5	0.133333	108.331	0
48.55	0.733333	108.729	0
48.6	0.133333	109.149	0
48.65	0.133333	109.436	0
48.7	0.266667	109.901	0
48.75	0.133333	110.299	0
48.8	0.533333	107.652	0
48.85	0.866667	109.939	0
48.9	0.533333	108.915	0
48.95	1.2	112.29	0
49	2.2	109.044
49.05	0.533333	111.331
49.1	2.4	107.595	1
49.15	3	108.149	1
49.2	3	103.502	1
49.25	3	107.278	1
49.3	1.2	109.298	0
49.35	0.266667	109.074	0
49.4	0	111.561	0
49.45	0.866667	113.114	0
49.5	0.133333	112.068	0
49.55	0.2	110.932	0
49.6	0.466667	109.864	0
49.65	1.86667	108.284
49.7	1.26667	112.659
49.75	1.33333	111.991
49.8	0.533333	109.877
49.85	1.33333	110.231
49.9	0.733333	105.762
49.95	0.266667	111.271
50	0.733333	111.758
50.05	0.666667	104.645
50.1	1.93333	105.065
50.15	0.533333	104.218
50.2	0.2	108.816
50.25	1.06667	110.348
50.3	1.26667	107.412
50.35	0.4	107.632
50.4	0.4	108.119
50.45	0.666667	107.362
50.5	3	108.182
50.55	3	109.535
50.6	3	105.111
50.65	1.26667	108.22
50.7	0.133333	108.107
50.75	1.93333	120.06
50.8	0.533333	119.458	0
50.85	0.266667	117.456	0
50.9	0.266667	117.454	0
50.95	0.266667	116.763	0
51	0.133333	115.494	0
51.05	0.466667	112.892	0
51.1	0.533333	116.068	0
51.15	0.2	109.91	0
51.2	0.066667	107.041	0
51.25	0	106.951	0
51.3	0.4	107.171	0
51.35	0.133333	109.191	0
51.4	0.333333	103.967	0
51.45	0.333333	108.231	0
51.5	0.133333	104.74	0
51.55	0.333333	108.338	0
51.6	0.133333	107.714	0
51.65	0.266667	106.734	0
51.7	0	104.354	0
51.75	2.86667	110.108	1
51.8	3	110.106	1
51.85	3	113.815	1
51.9	3	115.924	1
51.95	3	113.21	1
52	3	115.608	1
52.05	3	121.695	1
52.1	2.93333	125.271	1
52.15	0.266667	123.335	0
52.2	0.466667	129.733	0
52.25	0.6	136.42	0
52.3	0.266667	124.84	0
52.35	0.066667	121.972	0
52.4	1.8	124.169
52.45	1.33333	123.123
52.5	0.133333	114.81
52.55	0.266667	115.097
52.6	0.333333	111.183
52.65	0.2	116.27
52.7	0.266667	115.113
52.75	0	110.555
52.8	0.6	109.62
52.85	0.2	110.862
52.9	1.53333	112.082
52.95	0.533333	113.702	0
53	0.2	106.5	0
53.05	0.466667	108.32	0
53.1	0.266667	110.229	0
53.15	0.2	105.872	0
53.2	0	104.581	0
53.25	0.533333	104.445	0
53.3	1.66667	107.665	1
53.35	3	108.197	1
53.4	3	109.106	1
53.45	3	108.348	1
53.5	3	116.968	1
53.55	3	118.566	1
53.6	3	115.498	1
53.65	2.26667	121.162	1
53.7	0.2	113.116	0
53.75	0.266667	114.047	0
53.8	0.133333	115.511	0
53.85	0.866667	123.465	0
53.9	0.333333	130.085	0
53.95	0.133333	129.55	0
54	0.2	130.814	0
54.05	0.066667	121.945	0
54.1	0.333333	119.366	0
54.15	0.333333	117.986	0
54.2	0.2	118.695	0
54.25	0.466667	115.626	0
54.3	0.133333	114.18	0
54.35	0.133333	113.644	0
54.4	0.533333	112.353	0
54.45	2.66667	116.84	1
54.5	3	108.105	1
54.55	3	106.414	1
54.6	3	109.745	1
54.65	1.13333	111.832	0
54.7	0.8	112.007	0
54.75	0.066667	108.65	0
54.8	0.2	113.492	0
54.85	0.133333	112.712	0
54.9	0.933333	112.199	0
54.95	0	111.064	0
55	0.466667	108.039	0
55.05	0.466667	109.704	0
55.1	0.133333	108.546	0
55.15	0.066667	105.989	0
55.2	0.733333	106.809	0
55.25	2.46667	107.74	1
55.3	3	107.205	1
55.35	2.73333	107.492	1
55.4	0.8	112.378	0
55.45	0.133333	113.154	0
55.5	0.933333	112.841	0
55.55	0.133333	112.194	0
55.6	0.733333	117.17	0
55.65	0.666667	114.39	0
55.7	1.2	113.677	0
55.75	0.133333	110.675	0
55.8	1.93333	110.406
55.85	0.933333	114.36
55.9	1.4	113.313
55.95	0.4	105.689
56	3	113.153	1
56.05	3	110.107	1
56.1	3	115.438	1
56.15	3	114.547	1
56.2	0.8	112.656	0
56.25	1.13333	117.965	0
56.3	0	113.363	0
56.35	0.6	114.717	0
56.4	0.333333	112.604	0
56.45	0.266667	114.201	0
56.5	0.466667	112.644	0
56.55	0.2	118.242	0
56.6	0.066667	120.262	0
56.65	0.2	117.438	0
56.7	1.06667	115.68	0
56.75	0	106.478	0
56.8	0.4	113.787	0
56.85	0.266667	111.207	0
56.9	0.466667	108.783	0
56.95	0.266667	107.359	0
57	1.13333	111.356	0
57.05	3	107.865
57.1	1.4	110.419
57.15	0.933333	106.995
57.2	0.8	113.526
57.25	0.666667	109.968
57.3	3	118.744
57.35	3	109.431
57.4	3	116.095
57.45	0.733333	112.782
57.5	0.6	112.38
57.55	3	119.222
57.6	3	123.043
57.65	3	122.418
57.7	3	118.105
57.75	2.4	123.436
57.8	0.2	117.612
57.85	0.266667	121.432
57.9	0.066667	121.052
57.95	0.2	124.761
58	1.8	142.671
58.05	3	145.268
58.1	0.666667	129
58.15	0.333333	127.175
58.2	0.6	125.951
58.25	0	115.705
58.3	0.666667	113.68
58.35	0.2	116.145
58.4	0.866667	124.676
58.45	2.53333	133.296
58.5	0.466667	109.761
58.55	0.266667	110.381
58.6	0.466667	107.001
58.65	0.266667	107.821
58.7	0.933333	110.686
58.75	2.46667	106.306
58.8	3	109.926
58.85	3	113.858
58.9	3	118.833
58.95	1.2	121.098
59	2.26667	125.251
59.05	1	130.76	0
59.1	0.466667	130.825	0
59.15	1.46667	130.29	0
59.2	0.533333	114.043	0
59.25	1	115.663	0
59.3	0.466667	128.528	0
59.35	0.733333	124.148	0
59.4	0.533333	123.035	0
59.45	0.466667	110.877	0
59.5	0	108.897	0
59.55	0.333333	105.651	0
59.6	0.466667	105.404	0
59.65	3	118.78	1
59.7	3	111.378	1
59.75	3	114.509	1
59.8	3	113.662	1
59.85	2.86667	122.327	1
59.9	1.4	118.969
59.95	0.333333	112.834
60	2.6	157.099
60.05	1.8	151.785
60.1	0.6	146.406
60.15	0.333333	148.359
60.2	2.73333	151.135
60.25	1.46667	144.644
60.3	0.933333	140.064
60.35	2.33333	146.151
60.4	3	135.082
60.45	3	152.636
60.5	3	169.633
60.55	3	150.12
60.6	3	159.118
60.65	2.33333	146.338
60.7	1.8	146.47
60.75	3	131.001
60.8	1.73333	166.932
60.85	0.666667	160.997
60.9	2.06667	175.95
60.95	0.8	155.415
61	0.933333	164.59
61.05	2.2	161.966
61.1	0.666667	160.453
61.15	2.73333	160.984
61.2	3	159.027
61.25	2.06667	169.736
61.3	1.33333	149.178
61.35	1.73333	158.309
61.4	1.66667	169.063
61.45	1.86667	163.305
61.5	2.2	166.548
61.55	2.06667	174.79
61.6	2.2	183.81
61.65	3	165.697
61.7	3	177.184
61.75	3	220.382
61.8	3	190.402
61.85	1.73333	158.089
61.9	1.4	216.864
61.95	2.46667	184.507
62	0.266667	164.016
62.05	1.4	172.791
62.1	2.93333	172.989
62.15	0.066667	163.698
62.2	1.86667	183.696
62.25	1.06667	183.85
62.3	0.8	180.581
62.35	2.2	182.223
62.4	1.86667	171.866
62.45	1.4	170.997
62.5	3	173.106
62.55	2.2	164.371
62.6	3	167.457
62.65	3	207.833
62.7	3	215.853
62.75	3	213.14
62.8	3	176.938
62.85	3	197.203
62.9	2.46667	200.756
62.95	2.06667	174.087
63	2.86667	169.619
63.05	2.4	157.572
63.1	1.33333	159.437
63.15	3	160.879
63.2	0.733333	150.01
63.25	3	142.986
63.3	1.86667	147.495
63.35	1.6	144.048
63.4	2.53333	134.38
63.45	0.933333	137.333
63.5	0.466667	121.709
63.55	2.86667	129.662
63.6	2	130.949
63.65	0.533333	133.28
63.7	2.4	130.701
63.75	1.6	125.521
63.8	3	134.074
63.85	3	132.472
63.9	3	143.115
63.95	3	178.379
64	3	202.466
64.05	3	229.042
64.1	3	244.995
64.15	3	221.86
64.2	3	173.08
64.25	3	161.011
64.3	3	223.165
64.35	3	174.452
64.4	3	166.183
64.45	3	172.092
64.5	1.66667	163.845
64.55	0.4	150.376
64.6	0.4	172.619
64.65	1.93333	165.372	1
64.7	3	143.348	1
64.75	1.93333	138.524	1
64.8	0.733333	131.522	0
64.85	0.133333	130.875	0
64.9	0.6	128.429	0
64.95	0.666667	133.738	0
65	1	128.18	0
65.05	2	132.2
65.1	3	120.087
65.15	2.66667	121.529
65.2	0.333333	119.172	0
65.25	0.4	121.925	0
65.3	1.2	120.056	0
65.35	2.86667	117.632	1
65.4	3	117.719	1
65.45	3	118.65	1
65.5	3	151.626	1
65.55	3	153.068	1
65.6	3	127.977	1
65.65	3	145.597	1
65.7	3	152.351	1
65.75	3	134.282	1
65.8	3	146.169	1
65.85	3	138.945	1
65.9	1.13333	141.343
65.95	3	147.518
66	3	147.516
66.05	3	141.692
66.1	0.533333	132.734
66.15	0.466667	124.777
66.2	0.133333	122.419
66.25	2.93333	129.284
66.3	2.06667	120.148
66.35	0.466667	119.613
66.4	2.13333	120.833
66.45	3	121.964
66.5	0.866667	115.54
66.55	0.266667	109.138
66.6	0.466667	112.38
66.65	2.26667	110.778
66.7	1.33333	110.198
66.75	0.2	111.396
66.8	0.666667	111.061
66.85	0.133333	114.903
66.9	0.733333	110.968
66.95	0.266667	111.188
67	0.2	107.853
67.05	3	113.406
67.1	2.6	106.537
67.15	0.333333	112.069
67.2	1.53333	113.311
67.25	3	114.487
67.3	3	128.485
67.35	3	124.683
67.4	3	127.347
67.45	0.933333	131.656
67.5	3	141.076
67.55	3	191.074
67.6	3	170.228
67.65	1.93333	146.937
67.7	1.46667	168.446
67.75	2.06667	150.466
67.8	0.133333	124.442
67.85	0.266667	138.106
67.9	0.6	138.282
67.95	0.133333	129.702
68	0.133333	126.411
68.05	0.466667	131.987
68.1	0.133333	122.74
68.15	0.6	126.805
68.2	1.2	141.558
68.25	0.066667	136.69
68.3	0.466667	135.976
68.35	0.866667	132.441
68.4	0.933333	134.394
68.45	0.666667	129.348
68.5	0.466667	121.924
68.55	1.26667	115.055
68.6	3	116.142
68.65	2.33333	115.162
68.7	1.06667	117.36
68.75	3	114.313	1
68.8	3	117.978	1
68.85	3	118.465	1
68.9	3	113.063	1
68.95	3	137.572	1
69	3	138.525	1
69.05	1.33333	133.545	0
69.1	1.2	144.743	0
69.15	0.666667	161.43	0
69.2	0.2	165.45	0
69.25	0.133333	158.226	0
69.3	0.133333	160.357	0
69.35	0.333333	159.711	0
69.4	0.066667	155.82	0
69.45	0.266667	148.906	0
69.5	0	131.66	0
69.55	3	142.814	1
69.6	3	144.078	1
69.65	3	134.298	1
69.7	3	128.363	1
69.75	2.13333	124.338	1
69.8	0.6	115.981	0
69.85	0.333333	117.912	0
69.9	0.2	121.754	0
69.95	2.06667	119.041	1
70	3	115.173	1
70.05	3	115.459	1
70.1	3	117.302	1
70.15	3	116.455	1
70.2	3	114.875	1
70.25	3	124.74	1
70.3	2.4	122.094	1
70.35	0.066667	114.647	0
70.4	0	115.845	0
70.45	0.133333	109.932	0
70.5	0.466667	115.952	0
70.55	0.133333	113.75	0
70.6	0	105.659	0
70.65	0.733333	109.39	0
70.7	0.266667	110.01	0
70.75	1.13333	107.964	0
70.8	3	114.451
70.85	2.8	109.96
70.9	1.4	110.446	0
70.95	0.533333	107.444	0
71	0.2	107.976	0
71.05	0.533333	106.44	0
71.1	0.333333	108.505	0
71.15	0.266667	107.525	0
71.2	2.53333	108.278	1
71.25	3	107.787	1
71.3	3	104.319	1
71.35	3	107.339	1
71.4	3	111.626	1
71.45	3	115.712	1
71.5	3	119.977	1
71.55	2.13333	121.13	1
71.6	0.466667	114.262
71.65	0.133333	117.46
71.7	0.266667	110.991
71.75	2.53333	118.433
71.8	2.86667	118.853
71.85	0.133333	112.007
71.9	0.333333	111.138
71.95	0.6	117.803
72	1.13333	113.112

## Sheet: central_A9522
Time [hrs]	Waking [min/3min]	Bioluminescence	Wake bouts (='1') and sleep bouts (='0')
12.05	0.266667	265.189
12.1	0.666667	264.186
12.15	2.33333	287.65
12.2	2.53333	248.581
12.25	0.4	235.934
12.3	2.06667	255.175
12.35	3	239.04
12.4	3	236.815
12.45	2.46667	238.345
12.5	0.333333	206.898
12.55	1.8	204.94
12.6	3	219.426
12.65	3	210.157
12.7	3	212.132
12.75	3	195.996
12.8	1.93333	178.927
12.85	0.8	156.368
12.9	0.4	154.61
12.95	1.86667	185.185
13	3	208.738
13.05	3	216.891
13.1	3	216.911
13.15	3	228.397
13.2	0.8	201.794
13.25	0.6	180.08
13.3	2.86667	223.233
13.35	3	224.342
13.4	2.06667	190.25
13.45	2.46667	195.181
13.5	3	212.556
13.55	3	218.687
13.6	3	204.239
13.65	2.33333	208.748
13.7	2.2	227.567
13.75	3	212.387
13.8	3	214.895
13.85	3	265.026
13.9	3	225.535
13.95	3	247.11
14	3	225.818
14.05	2.53333	227.571
14.1	2.8	209.88
14.15	3	187.388
14.2	3	247.696
14.25	1.86667	201.871
14.3	0.866667	198.691
14.35	1.6	188.599
14.4	3	206.552
14.45	3	209.061
14.5	1.4	211.214
14.55	0.533333	196.944
14.6	0.4	190.453
14.65	3	227.628
14.7	3	217.136
14.75	1.26667	208.578
14.8	0.733333	179.02
14.85	1.53333	179.884	1
14.9	3	195.748	1
14.95	3	218.456	1
15	3	227.965	1
15.05	2.53333	211.695	1
15.1	2.93333	207.582	1
15.15	3	232.401	1
15.2	3	222.287	1
15.25	3	260.996	1
15.3	3	239.282	1
15.35	3	242.702	1
15.4	3	232.877	1
15.45	3	234.474	1
15.5	3	278.938	1
15.55	3	266.558	1
15.6	3	328.444	1
15.65	3	273.263	1
15.7	3	282.75	1
15.75	3	269.702	1
15.8	3	268.833	1
15.85	3	263.319	1
15.9	3	309.295	1
15.95	3	254.114	1
16	3	255.334	1
16.05	3	241.175	1
16.1	3	267.351	1
16.15	3	233.148	1
16.2	3	281.745	1
16.25	3	363.187	1
16.3	3	285.562	1
16.35	3	223.759	1
16.4	3	222.112	1
16.45	3	216.11	1
16.5	3	226.951	1
16.55	3	230.038	1
16.6	3	286.968	1
16.65	2.6	227.099	1
16.7	2.53333	234.252	1
16.75	0.533333	180.294	0
16.8	0.866667	212.291	0
16.85	0.6	192.955	0
16.9	0.066667	177.974	0
16.95	1.4	217.55	0
17	0.466667	199.191	0
17.05	0.666667	212.922	0
17.1	0	173.697	0
17.15	1.13333	206.25	0
17.2	0.8	243.403	0
17.25	0.733333	240.556	0
17.3	0.866667	255.109	0
17.35	0.8	218.328	0
17.4	0.866667	206.059	0
17.45	0.866667	191.812	0
17.5	0.666667	162.187	0
17.55	3	240.406	1
17.6	3	206.404	1
17.65	3	162.134	1
17.7	3	188.665	1
17.75	3	207.573	1
17.8	3	165.482	1
17.85	3	190.746	1
17.9	3	217.277	1
17.95	3	188.829	1
18	3	282.56	1
18.05	3	247.046	1
18.1	3	296.71	1
18.15	3	318.063	1
18.2	3	289.372	1
18.25	3	288.391	1
18.3	3	316.211	1
18.35	3	253.519	1
18.4	3	316.894	1
18.45	3	284.07	1
18.5	3	344.2	1
18.55	3	274.086	1
18.6	3	246.817	1
18.65	3	324.814	1
18.7	2	236.634	1
18.75	3	275.12	1
18.8	3	322.873	1
18.85	2.93333	317.981	1
18.9	3	308.334	1
18.95	3	286.154	1
19	2.86667	242.618	1
19.05	3	255.771	1
19.1	1.33333	247.546
19.15	2	248.299
19.2	3	292.229
19.25	2.4	247.494
19.3	0.733333	216.002
19.35	0.466667	209.355
19.4	0.266667	241.997
19.45	1.13333	236.883
19.5	3	288.791
19.55	3	247.433
19.6	2.8	230.919
19.65	1.06667	192.672
19.7	1.06667	160.18
19.75	3	250.333	1
19.8	3	252.531	1
19.85	1.66667	179.306	1
19.9	0.2	152.903	0
19.95	0.4	151.123	0
20	0.266667	152.676	0
20.05	0.066667	150.917	0
20.1	0	146.893	0
20.15	1.4	175.512	0
20.2	3	193.976
20.25	3	186.418
20.3	3	182.326
20.35	1.46667	173.412
20.4	0.266667	160.299
20.45	3	177.518
20.5	1.86667	161.093
20.55	3	180.535
20.6	1.2	153.155
20.65	1.4	172.374
20.7	3	181.705
20.75	2.86667	203.258
20.8	2.06667	185.744
20.85	1.26667	184.186
20.9	2.73333	221.45
20.95	1	173.78
21	3	225.8
21.05	3	217.909
21.1	1.46667	187.572	0
21.15	0.466667	190.57	0
21.2	0.933333	194.945	0
21.25	0	172.209	0
21.3	0.6	170.917	0
21.35	0.066667	158.981	0
21.4	0.333333	186.89	0
21.45	1.93333	232.087	1
21.5	2	212.818	1
21.55	3	215.104	1
21.6	3	202.613	1
21.65	3	207.099	1
21.7	3	197.118	1
21.75	2.06667	176.582	1
21.8	0.933333	145.469
21.85	1	158.577
21.9	0.333333	136.019
21.95	0.533333	138.083
22	1.66667	170.813
22.05	0.066667	134.166
22.1	0.666667	129.386
22.15	2	160.361
22.2	0.6	125.914	0
22.25	0	132.622	0
22.3	1.13333	136.775	0
22.35	3	161.239	1
22.4	3	149.503	1
22.45	3	150.612	1
22.5	3	149.342	1
22.55	3	168.628	1
22.6	3	192.181	1
22.65	3	189.645	1
22.7	3	196.798	1
22.75	3	228.218	1
22.8	3	214.326	1
22.85	3	258.39	1
22.9	3	216.41	1
22.95	3	259.074	1
23	3	250.071	1
23.05	1.8	227.913	1
23.1	0.933333	211.621	0
23.15	0.266667	204.907	0
23.2	0	200.727	0
23.25	1.06667	209.413	0
23.3	1.26667	210.966	0
23.35	0.133333	190.43	0
23.4	0.266667	168.872	0
23.45	0.466667	180.803	0
23.5	0.666667	202.844	0
23.55	0.2	164.908	0
23.6	0.4	162.906	0
23.65	0.666667	170.059	0
23.7	1.73333	215.056	1
23.75	2.06667	217.653	1
23.8	3	234.362	1
23.85	3	215.559	1
23.9	3	192.201	1
23.95	3	197.798	1
24	3	182.929	1
24.05	3	192.637	1
24.1	1.73333	169.99	1
24.15	0.6	175.521	0
24.2	0.733333	169.007	0
24.25	0.933333	169.049	0
24.3	0	149.691	0
24.35	0.733333	150.266	0
24.4	1.33333	178.152	0
24.45	0.266667	157.06	0
24.5	0.6	145.702	0
24.55	0.066667	147.922	0
24.6	1.66667	159.963	1
24.65	3	173.694	1
24.7	3	168.202	1
24.75	3	163.378	1
24.8	3	153.108	1
24.85	3	149.017	1
24.9	3	148.147	1
24.95	3	154.478	1
25	2.06667	151.053	1
25.05	0.133333	131.495
25.1	0.066667	136.626
25.15	2.2	169.067
25.2	1.33333	147.687
25.25	0.2	138.973
25.3	0.133333	140.659
25.35	1.86667	168.568
25.4	0.6	143.165	0
25.45	0.666667	136.496	0
25.5	0.466667	133.471	0
25.55	1.33333	144.668	0
25.6	0.133333	121.954	0
25.65	1.06667	127.596	0
25.7	0.066667	120.149	0
25.75	0.066667	117.68	0
25.8	0.133333	117.633	0
25.85	1.26667	121.786	0
25.9	1.33333	118.939	0
25.95	0.6	112.914	0
26	1.26667	114.778	0
26.05	1.6	113.997	1
26.1	3	115.75	1
26.15	3	115.97	1
26.2	3	115.922	1
26.25	3	121.964	1
26.3	2.2	126.339	1
26.35	0.066667	121.092
26.4	0.4	120.001
26.45	1	134.731
26.5	1.8	137.818
26.55	1.8	134.348
26.6	1.33333	144.59
26.65	0.066667	123.321
26.7	2.2	133.696
26.75	0.133333	125.404	0
26.8	0.2	120.891	0
26.85	0.333333	117.377	0
26.9	1	120.352	0
26.95	0.266667	116.082	0
27	0	112.346	0
27.05	1.33333	115.21	0
27.1	1.13333	116.474	0
27.15	1.26667	115.605	0
27.2	0.866667	114.269	0
27.25	0.466667	112.533	0
27.3	0.4	108.486	0
27.35	0.333333	108.883	0
27.4	2.6	110.347	1
27.45	3	110.5	1
27.5	2.66667	117.275	1
27.55	3	128.673	1
27.6	3	132.203	1
27.65	3	143.045	1
27.7	3	141.798	1
27.75	3	140.506	1
27.8	3	154.726	1
27.85	3	171.99	1
27.9	3	177.232	1
27.95	3	171.007	1
28	3	169.093	1
28.05	2.86667	183.935	1
28.1	0.133333	151.732	0
28.15	0.266667	149.618	0
28.2	0.066667	150.482	0
28.25	1.26667	159.813	0
28.3	0.733333	175.033	0
28.35	0.466667	166.83	0
28.4	0.6	156.872	0
28.45	1	175.291	0
28.5	0.533333	160.955	0
28.55	0.4	140.375	0
28.6	1	152.328	0
28.65	0.933333	161.325	0
28.7	0.8	156.3	0
28.75	0.133333	135.542	0
28.8	0.466667	137.495	0
28.85	0.266667	132.292	0
28.9	1.26667	133.489	0
28.95	0.933333	146.865	0
29	0.2	133.195	0
29.05	0.666667	132.415	0
29.1	1	137.968	0
29.15	3	143.032	1
29.2	3	130.762	1
29.25	3	139.426	1
29.3	3	142.624	1
29.35	3	144.377	1
29.4	1.26667	133.485	0
29.45	0.133333	122.038	0
29.5	0.4	124.035	0
29.55	0.533333	141.433	0
29.6	1	146.785	0
29.65	1.13333	147.116	0
29.7	1	141.691	0
29.75	0.4	131.266	0
29.8	1.2	140.33	0
29.85	3	151.328	1
29.9	3	134.214	1
29.95	3	135.278	1
30	3	142.275	1
30.05	2.8	133.006	1
30.1	0.533333	132.559	0
30.15	0.6	131.623	0
30.2	0.333333	126.931	0
30.25	1	148.129	0
30.3	0.2	148.059	0
30.35	0.866667	152.323	0
30.4	1.6	161.232
30.45	1	145.162
30.5	0.133333	135.982
30.55	2.13333	149.268
30.6	0.866667	144.732	0
30.65	0.133333	129.396	0
30.7	0.533333	133.527	0
30.75	0.933333	136.146	0
30.8	2.4	132.344	1
30.85	3	136.43	1
30.9	3	134.427	1
30.95	3	137.225	11
31	3	141.488	1
31.05	2.8	133.064	1
31.1	0.2	116.705	0
31.15	0.6	126.725	0
31.2	0.2	119.433	0
31.25	0.666667	125.72	0
31.3	0.6	140.384	0
31.35	1.06667	153.559	0
31.4	0.6	147.712	0
31.45	0.333333	141.287	0
31.5	0.266667	134.129	0
31.55	0.733333	126.392	0
31.6	0.866667	133.457	0
31.65	0.333333	120.832	0
31.7	0.2	117.696	0
31.75	0.133333	117.093	0
31.8	0.133333	118.268	0
31.85	0.533333	120.91	0
31.9	0.6	118.063	0
31.95	0.933333	118.149	0
32	1.73333	136.635
32.05	0.4	120.166	0
32.1	1.46667	131.208	0
32.15	0.333333	127.938	0
32.2	1.13333	121.891	0
32.25	3	129.977	1
32.3	3	126.663	1
32.35	3	121.239	1
32.4	3	124.169	1
32.45	2.93333	125.789	1
32.5	2.26667	123.942	1
32.55	2.26667	130.361	1
32.6	3	135.048	1
32.65	1.4	151.2	0
32.7	0.4	121.064	0
32.75	0.2	122.506	0
32.8	0.733333	147.526	0
32.85	0.666667	170.301	0
32.9	0.133333	173.12	0
32.95	1	166.562	0
33	0.533333	152.16	0
33.05	1	138.268	0
33.1	1.73333	154.932
33.15	0.866667	177.085
33.2	0.666667	165.149
33.25	0.666667	150.035
33.3	0.066667	126.388
33.35	1.73333	140.141
33.4	0.6	136.871	0
33.45	0.266667	131.024	0
33.5	0.4	135.933	0
33.55	1.4	146.863	0
33.6	0.666667	137.816	0
33.65	0.6	141.258	0
33.7	1.06667	134.7	0
33.75	3	154.075	1
33.8	3	137.139	1
33.85	3	123.692	1
33.9	3	140.623	1
33.95	3	141.642	1
34	3	141.328	1
34.05	3	147.059	1
34.1	2.26667	143.812	1
34.15	0.333333	127.965	0
34.2	0.266667	129.895	0
34.25	1.13333	150.182	0
34.3	0.8	183.335	0
34.35	0.533333	169.088	0
34.4	0.8	153.44	0
34.45	0.466667	191.838	0
34.5	0.733333	178.991	0
34.55	0.4	177.032	0
34.6	0.733333	158.252	0
34.65	0.666667	174.005	0
34.7	1.06667	164.691	0
34.75	1.33333	188.911	0
34.8	0.666667	169.063	0
34.85	1.33333	160.216	0
34.9	1.46667	175.814	0
34.95	0.6	146.522	0
35	1.93333	143.297	1
35.05	3	167.006	1
35.1	3	177.336	1
35.15	3	167.667	1
35.2	3	164.464	1
35.25	3	157.217	1
35.3	3	166.526	1
35.35	3	177.434	1
35.4	3	177.365	1
35.45	3	181.318	1
35.5	1.6	147.648	1
35.55	0.133333	131.801	0
35.6	1	188.643	0
35.65	1.2	171.04	0
35.7	0.8	230.838	0
35.75	0.466667	192.213	0
35.8	0.666667	181.943	0
35.85	0.8	188.274	0
35.9	0.533333	154.583	0
35.95	2.26667	214.935	1
36	3	221.377	1
36.05	3	210.841	1
36.1	3	191.105	1
36.15	3	170.969	1
36.2	3	171.7	1
36.25	0.4	173.742
36.3	1	185.983
36.35	3	180.336
36.4	2.8	196.023
36.45	2.86667	174.798
36.5	1.6	193.728
36.55	1.4	182.459
36.6	2.73333	193.39
36.65	3	200.565
36.7	3	205.429
36.75	2.26667	204.204
36.8	0.133333	177.69
36.85	0.733333	208.532
36.9	3	254.818
36.95	3	244.882
37	3	244.213
37.05	3	261.41
37.1	2	231.452
37.15	2.93333	272.094
37.2	1.93333	282.669
37.25	1	271.622
37.3	2.73333	243.619
37.35	1.06667	259.55
37.4	0.666667	243.013
37.45	1.6	259.833
37.5	3	274.03
37.55	2.8	232.272
37.6	2.66667	243.669
37.65	1.46667	255.267
37.7	3	301.864
37.75	2.06667	214.484
37.8	2.46667	266.214
37.85	3	320.701
37.9	1.46667	246.387
37.95	2.33333	247.562
38	3	229.781
38.05	2.73333	278.09
38.1	0.666667	227.91
38.15	2.93333	271.951
38.2	2	258.726
38.25	1.8	231.924
38.3	3	249.543
38.35	1.46667	216.652
38.4	3	258.316
38.45	3	254.357
38.5	2.13333	247.866
38.55	2.86667	323.441
38.6	2.86667	300.661
38.65	2.86667	307.391
38.7	1.8	256.233
38.75	1.66667	248.142
38.8	3	303.005
38.85	1.26667	192.714
38.9	0.4	286.8
38.95	2.53333	304.109
39	2.73333	293.039
39.05	0.6	239.659
39.1	2.06667	268.256
39.15	1	275.965
39.2	1.06667	263.229
39.25	0.266667	165.493
39.3	2	212.023
39.35	3	243.732
39.4	2.86667	192.262
39.45	0.933333	234.66
39.5	1.06667	278.635
39.55	3	262.299
39.6	3	360.674
39.65	3	289.916
39.7	3	281.313
39.75	3	371.866
39.8	3	303.174
39.85	3	316.683
39.9	3	295.436
39.95	3	304.322
40	3	312.564
40.05	3	366.872
40.1	3	341.069
40.15	3	231.8
40.2	3	385.397
40.25	3	364.75
40.3	3	326.903
40.35	3	302.589
40.4	3	353.253
40.45	3	381.651
40.5	3	321.315
40.55	3	254.468
40.6	2.53333	248.243
40.65	3	335.24
40.7	3	413.837
40.75	3	382.657
40.8	3	345.943
40.85	3	360.052
40.9	3	251.56
40.95	3	332.78
41	3	333.755
41.05	3	310.485
41.1	3	307.016
41.15	2.66667	260.013
41.2	3	360.211
41.25	3	344.452
41.3	3	262.294
41.35	3	262.047
41.4	3	374.245
41.45	3	317.886
41.5	3	292.772
41.55	3	309.214
41.6	3	279.145
41.65	2.86667	278.898
41.7	2.06667	260.095
41.75	1.26667	227.848
41.8	3	237.668
41.85	2.93333	254.198
41.9	0.266667	197.951
41.95	2.13333	230.037
42	3	261.524
42.05	1.4	204.476
42.1	0.4	200.363
42.15	2.4	254.516
42.2	3	281.291
42.25	2.4	270.488
42.3	0.8	192.574
42.35	1.2	202.616
42.4	3	186.88
42.45	1.8	207.366
42.5	0.066667	190.163	0
42.55	0.866667	188.25	0
42.6	0.066667	190.025	0
42.65	0.666667	188.711	0
42.7	0.333333	195.286	0
42.75	0.066667	178.706	0
42.8	0.333333	174.503	0
42.85	1	192.811	0
42.9	3	196.675	1
42.95	3	192.806	1
43	3	177.892	1
43.05	3	201.49	1
43.1	1.66667	174.598	1
43.15	0.733333	155.04
43.2	2.2	173.171
43.25	3	201.035
43.3	3	265.587
43.35	3	263.629
43.4	3	249.249
43.45	3	241.157
43.5	3	228.732
43.55	3	232.996
43.6	3	239.083
43.65	3	276.147
43.7	3	297.033
43.75	3	282.919
43.8	3	255.716
43.85	3	226.158
43.9	3	282.889
43.95	3	316.108
44	1.6	204.306
44.05	2.53333	234.659
44.1	0.6	182.656
44.15	2.06667	213.187	1
44.2	3	202.451	1
44.25	3	245.004	1
44.3	2.06667	218.845	1
44.35	0.2	156.309	0
44.4	0.4	166.262	0
44.45	0.2	183.704	0
44.5	0.6	198.079	0
44.55	0.266667	159.699	0
44.6	0.4	151.096	0
44.65	1.06667	207.16	0
44.7	0.8	200.602	0
44.75	0.066667	157.31	0
44.8	1.06667	201.33	0
44.85	0	183.905	0
44.9	0.333333	176.147	0
44.95	0.666667	153.877	0
45	0.866667	156.363	0
45.05	0.266667	132.827	0
45.1	0.266667	129.247	0
45.15	0.933333	128.8	0
45.2	0.2	128.108	0
45.25	1.06667	133.483	0
45.3	3	167.258	1
45.35	3	158.056	1
45.4	3	146.853	1
45.45	3	166.917	1
45.5	3	153.737	1
45.55	3	156.245	1
45.6	3	207.042	1
45.65	3	197.751	1
45.7	3	206.526	1
45.75	3	228.168	1
45.8	3	217.676	1
45.85	2.73333	206.874	1
45.9	1.26667	174.982
45.95	3	233.802
46	3	229.155
46.05	3	193.552
46.1	3	170.482
46.15	3	216.391
46.2	2.93333	206.744
46.25	2.6	205.274
46.3	0.666667	181.85
46.35	2.8	189.714
46.4	1.46667	183.578	0
46.45	0	177.153	0
46.5	0.866667	177.75	0
46.55	0.4	181.992	0
46.6	0.4	173.989	0
46.65	0.666667	171.853	0
46.7	0.466667	184.406	0
46.75	0.6	177.203	0
46.8	0.066667	165.223	0
46.85	0.4	147.42	0
46.9	0.066667	138.151	0
46.95	0.2	134.593	0
47	0.133333	132.212	0
47.05	2.6	173.165	1
47.1	3	177.651	1
47.15	3	156.426	1
47.2	3	155.224	1
47.25	3	198.621	1
47.3	3	199.196	1
47.35	3	188.638	1
47.4	3	170.013	1
47.45	3	197.655	1
47.5	3	212.674	1
47.55	3	205.583	1
47.6	1.86667	179.18	1
47.65	1.26667	249.311	0
47.7	0.133333	151.219	0
47.75	0.8	174.861	0
47.8	0.733333	192.125	0
47.85	0.066667	165.322	0
47.9	1	179.986	0
47.95	0.266667	192.45	0
48	0.8	172.803	0
48.05	3	246.978	1
48.1	3	220.398	1
48.15	3	222.173	1
48.2	3	222.104	1
48.25	2.26667	208.434	1
48.3	0.2	184.721	0
48.35	0.6	146.407	0
48.4	0.333333	134.738	0
48.45	0.6	148.935	0
48.5	0.333333	160.621	0
48.55	0.066667	187.418	0
48.6	2.33333	190.26
48.65	0.866667	179.569
48.7	0.333333	183.099
48.75	1.2	178.963
48.8	0.666667	158.494
48.85	0.4	167.202
48.9	0.333333	153.377
48.95	0	128.042
49	0.6	121.706
49.05	0.466667	115.081
49.1	0.333333	125.633
49.15	0.533333	132.631
49.2	0.6	132.295
49.25	0.133333	132.781
49.3	1	126.356
49.35	1.66667	112.042
49.4	0.666667	106.306	0
49.45	0.533333	103.281	0
49.5	0.866667	115.812	0
49.55	0.6	109.721	0
49.6	0.133333	98.029	0
49.65	3	112.137	1
49.7	3	107.468	1
49.75	3	103.599	1
49.8	3	109.596	1
49.85	3	130.482	1
49.9	3	133.88	1
49.95	3	156.366	1
50	3	155.652	1
50.05	3	174.361	1
50.1	3	175.891	1
50.15	3	178.911	1
50.2	3	176.286	1
50.25	2.53333	176.105	1
50.3	1.33333	158.414	0
50.35	0.133333	170.722	0
50.4	0.333333	165.253	0
50.45	0.133333	134.65	0
50.5	0.2	141.27	0
50.55	0.066667	144.045	0
50.6	1.26667	169.02	0
50.65	0.866667	155.262	0
50.7	0.866667	169.859	0
50.75	0.8	153.634	0
50.8	0.266667	134.343	0
50.85	0.333333	132.785	0
50.9	0.066667	134.471	0
50.95	1.73333	145.979	1
51	3	177.843	1
51.05	3	181.396	1
51.1	3	162.727	1
51.15	1	127.791	0
51.2	0	112.388	0
51.25	1.26667	118.874	0
51.3	1.06667	128.494	0
51.35	1.06667	128.491	0
51.4	0.066667	115.8	0
51.45	0.066667	116.13	0
51.5	1.33333	132.239	0
51.55	0.333333	115.858	0
51.6	0.466667	112.278	0
51.65	0.866667	112.253	0
51.7	0.333333	112.073	0
51.75	0.4	106.981	0
51.8	0.266667	103.823	0
51.85	0.066667	95.5311	0
51.9	2.73333	110.773
51.95	1.4	111.304
52	3	106.523	1
52.05	3	115.298	1
52.1	3	113.362	1
52.15	3	123.271	1
52.2	3	123.601	1
52.25	3	118.11	1
52.3	2.46667	127.129	1
52.35	0.133333	101.549	0
52.4	0.2	105.435	0
52.45	0.4	111.61	0
52.5	0.333333	110.896	0
52.55	0.266667	109.027	0
52.6	1.26667	177.913	0
52.65	0.533333	176.688	0
52.7	0.4	164.33	0
52.75	1.06667	147.061	0
52.8	0.266667	143.103	0
52.85	0.333333	151.433	0
52.9	0.866667	157.675	0
52.95	1	142.895	0
53	0.2	124.292	0
53.05	1.13333	125	0
53.1	0.933333	127.553	0
53.15	1	116.128	0
53.2	0.6	126.192	0
53.25	0.533333	138.079	0
53.3	0.933333	119.654	0
53.35	1.73333	124.74
53.4	1.4	120.159
53.45	3	121.424	1
53.5	3	119.665	1
53.55	3	115.174	1
53.6	3	120.104	1
53.65	3	119.546	1
53.7	3	127.944	1
53.75	2.6	137.852	1
53.8	1.66667	140.938	1
53.85	0.466667	119.002	0
53.9	0.666667	123.155	0
53.95	0.266667	109.397	0
54	0.8	131.039	0
54.05	0.2	171.214	0
54.1	0	136.256	0
54.15	0.466667	137.186	0
54.2	1	142.85	0
54.25	1.73333	177.648
54.3	0.066667	150.156	0
54.35	0.533333	151.175	0
54.4	1.13333	193.284	0
54.45	0.733333	138.57	0
54.5	0.2	121.434	0
54.55	1.2	141.987	0
54.6	2.93333	164.029	1
54.65	3	188.959	1
54.7	3	163.957	1
54.75	3	170.865	1
54.8	3	160.218	1
54.85	3	157.726	1
54.9	3	163.479	1
54.95	2.4	148.921	1
55	0.333333	113.296
55.05	1.86667	140.471
55.1	2.93333	158.713
55.15	3	139.577
55.2	1.8	130.575
55.25	0	114.305
55.3	1.2	134.48
55.35	1.66667	150.411
55.4	0.466667	129.386
55.45	1.6	151.672
55.5	0.466667	128.314	0
55.55	0.266667	115.134	0
55.6	0.4	111.953	0
55.65	0.533333	119.728	0
55.7	0.066667	113.703	0
55.75	0.066667	109.301	0
55.8	0.333333	116.543	0
55.85	0.866667	117.295	0
55.9	0.6	113.804	0
55.95	0.133333	110.335	0
56	2	125.754	1
56.05	3	146.351	1
56.1	3	143.615	1
56.15	3	133.035	1
56.2	3	121.01	1
56.25	3	118.696	1
56.3	3	124.471	1
56.35	3	124.046	1
56.4	1.66667	107.422	1
56.45	0.133333	102.752	0
56.5	1	114.283	0
56.55	0.666667	132.147	0
56.6	1.26667	127.922	0
56.65	0.8	132.297	0
56.7	0.2	119.383	0
56.75	0.533333	115.714	0
56.8	0.133333	102.823	0
56.85	0.8	108.242	0
56.9	0.733333	119.484	0
56.95	0.266667	108.103	0
57	0.6	109.301	0
57.05	0.333333	123.387	0
57.1	0.533333	103.873	0
57.15	0.733333	114.759	0
57.2	1.13333	113.046	0
57.25	1	111.487	0
57.3	0.866667	111.84	0
57.35	1.73333	114.793	1
57.4	3	109.124	1
57.45	3	108.299	1
57.5	3	108.252	1
57.55	3	107.094	1
57.6	3	111.891	1
57.65	2.6	112.977	1
57.7	0.933333	111.997
57.75	0.133333	108.772
57.8	0.8	113.791
57.85	0.333333	109.3
57.9	3	165.164
57.95	2.53333	152.339
58	2.33333	159.447
58.05	1.93333	147.289
58.1	0.2	113.886
58.15	0.333333	151.262
58.2	2.6	154.837
58.25	3	152.745
58.3	0.533333	108.876
58.35	0.333333	104.317
58.4	0.6	117.048
58.45	0.8	118.601
58.5	1.06667	125.909
58.55	0.4	122.374
58.6	0.133333	117.26
58.65	1.86667	128.257
58.7	1.8	130.343
58.75	0.866667	120.474	0
58.8	0.666667	115.071	0
58.85	0.4	112.469	0
58.9	1.2	113.955	0
58.95	0.6	113.863	0
59	2.8	112.327	1
59.05	3	118.058	1
59.1	3	131.5	1
59.15	3	130.808	1
59.2	2.86667	135.717	1
59.25	3	148.669	1
59.3	3	134.667	1
59.35	3	144.709	1
59.4	3	177.217	1
59.45	2.53333	153.125	1
59.5	1.26667	164.834	0
59.55	0.666667	169.098	0
59.6	0.533333	149.451	0
59.65	0.666667	194.293	0
59.7	0.266667	195.223	0
59.75	0.866667	155.554	0
59.8	1.13333	147.618	0
59.85	1.13333	156.304	0
59.9	0	123.857	0
59.95	2.66667	179.543	1
60	2.8	192.252	1
60.05	3	149.405	1
60.1	3	162.557	1
60.15	3	150.821	1
60.2	2.53333	179.374	1
60.25	1.33333	168.794	0
60.3	1.46667	153.947	0
60.35	0.866667	171.5	0
60.4	3	161.919	1
60.45	3	181.872	1
60.5	3	207.514	1
60.55	3	237.067	1
60.6	3	265.397	1
60.65	3	227.395	1
60.7	3	203.014	1
60.75	3	258.634	1
60.8	3	187.276	1
60.85	3	243.517	1
60.9	3	218.692	1
60.95	2.06667	241.779	1
61	3	191.332	1
61.05	1.73333	240.396	1
61.1	2	206.504	1
61.15	2	298.257	1
61.2	1.2	302.61
61.25	3	236.452
61.3	1.6	232.538
61.35	1.26667	225.913
61.4	3	257.577
61.45	3	312.374
61.5	3	288.016
61.55	3	314.813
61.6	3	280.011
61.65	3	250.319
61.7	3	178.25
61.75	1.6	249.203
61.8	1.13333	225.556
61.85	1.46667	242.531
61.9	0.8	183.75
61.95	2.6	271.392
62	2.73333	258.034
62.05	1.26667	242.809	0
62.1	0.333333	301.34	0
62.15	0.866667	246.67	0
62.2	0.8	197.468	0
62.25	3	220.131	1
62.3	3	231.84	1
62.35	3	338.771	1
62.4	3	242.746	1
62.45	3	317.832	1
62.5	3	315.851	1
62.55	3	322.738	1
62.6	3	257.291	1
62.65	3	253.199	1
62.7	3	286.841	1
62.75	3	334.66	1
62.8	3	290.969	1
62.85	3	269.122	1
62.9	3	233.541	1
62.95	3	316.361	1
63	2.66667	261.558	1
63.05	3	258.6	1
63.1	3	359.442	1
63.15	3	327.061	1
63.2	3	325.703	1
63.25	3	267.945	1
63.3	3	238.298	1
63.35	3	356.162	1
63.4	3	308.515	1
63.45	3	326.045	1
63.5	3	238.176	1
63.55	3	258.973	1
63.6	3	285.659	1
63.65	3	207.59	1
63.7	3	386.41	1
63.75	3	341.696	1
63.8	3	355.916	1
63.85	3	356.624	1
63.9	3	316.377	1
63.95	2.4	248.996	1
64	2.33333	262.749	1
64.05	3	335.391	1
64.1	3	288.144	1
64.15	3	244.697	1
64.2	3	342.205	1
64.25	3	327.425	1
64.3	3	322.156	1
64.35	3	289.242	1
64.4	3	230.061	1
64.45	3	220.236	1
64.5	3	189.7	1
64.55	3	319.32	1
64.6	3	339.851	1
64.65	3	307.159	1
64.7	2.93333	286.69	1
64.75	0.733333	196.287
64.8	0.533333	161.818
64.85	2.66667	224.104
64.9	3	210.234
64.95	1.6	195.632
65	0.266667	156.207	0
65.05	0.933333	184.115	0
65.1	0.133333	144.602	0
65.15	0.466667	139.866	0
65.2	1.8	199.085	1
65.25	3	232.816	1
65.3	3	197.946	1
65.35	3	221.366	1
65.4	3	342.097	1
65.45	3	289.761	1
65.5	3	279.825	1
65.55	3	284.355	1
65.6	3	246.664	1
65.65	3	278.594	1
65.7	3	255.192	1
65.75	3	252.234	1
65.8	3	273.409	1
65.85	3	210.539	1
65.9	3	227.892	1
65.95	3	296.978	1
66	3	292.865	1
66.05	3	263.573	1
66.1	3	256.971	1
66.15	3	307.19	1
66.2	3	268.01	1
66.25	3	238.407	1
66.3	3	228.982	1
66.35	3	315.335	1
66.4	2.6	269.132	1
66.45	1.26667	199.041
66.5	3	239.971
66.55	2.06667	214.635
66.6	2.66667	194.055
66.65	2.46667	262.163
66.7	1	197.961
66.75	2.6	229.558
66.8	0.333333	171.822
66.85	0.4	179.797
66.9	2.46667	240.883
66.95	1.13333	199.925
67	0.066667	160.367
67.05	2.6	213.186
67.1	3	270.739
67.15	2.66667	253.803
67.2	0.4	186.112
67.25	0.933333	186.376
67.3	3	228.795
67.35	3	203.77
67.4	1.46667	175.657
67.45	0.066667	177.721
67.5	1.86667	188.918
67.55	1.8	199.315
67.6	0.066667	144.802	0
67.65	1.2	173.843	0
67.7	1	184.307	0
67.75	0.333333	155.727	0
67.8	0.266667	186.991	0
67.85	0.866667	178.966	0
67.9	0.866667	185.052	0
67.95	0.533333	166.894	0
68	0.6	185.225	0
68.05	0.6	157.466	0
68.1	3	184.153	1
68.15	3	178.461	1
68.2	3	180.169	1
68.25	3	199.456	1
68.3	3	208.053	1
68.35	3	186.45	1
68.4	3	161.248	1
68.45	3	176.112	1
68.5	3	231.731	1
68.55	3	223.351	1
68.6	3	221.126	1
68.65	3	263.034	1
68.7	3	235.743	1
68.75	3	222.918	1
68.8	2.8	230.738	1
68.85	1.33333	229.135
68.9	0.133333	173.11
68.95	2.13333	202.174
69	3	256.282
69.05	3	312.969
69.1	1.26667	194.21
69.15	2.66667	216.808	1
69.2	3	220.205	1
69.25	1.93333	220.402	1
69.3	0.266667	201.555	0
69.35	0.6	159.086	0
69.4	0.4	183.883	0
69.45	0.533333	241.103	0
69.5	0.733333	242.345	0
69.55	0.2	169.431	0
69.6	0.4	149.117	0
69.65	0.466667	196.403	0
69.7	0.866667	232.378	0
69.75	0.466667	176.864	0
69.8	0.866667	166.129	0
69.85	0.333333	176.326	0
69.9	0.066667	129.19	0
69.95	0.466667	152.12	0
70	0.266667	138.251	0
70.05	0.533333	146.026	0
70.1	0.333333	143.201	0
70.15	2.26667	160.354	1
70.2	3	182.574	1
70.25	3	159.26	1
70.3	3	184.324	1
70.35	3	178.188	1
70.4	3	177.852	1
70.45	3	151.427	1
70.5	3	156.469	1
70.55	3	173.355	1
70.6	3	200.352	1
70.65	3	206.483	1
70.7	3	178.925	1
70.75	3	225.922	1
70.8	3	210.475	1
70.85	2.8	198.695	1
70.9	1.8	216.536	1
70.95	2.66667	214.023	1
71	3	228.864	1
71.05	3	225.262	1
71.1	3	279.348	1
71.15	2.93333	251.39	1
71.2	0.6	166.787	0
71.25	0.133333	182.962	0
71.3	0.866667	198.204	0
71.35	2.46667	208.068	1
71.4	3	214.599	1
71.45	3	243.863	1
71.5	3	244.327	1
71.55	2.93333	235.457	1
71.6	0.333333	218.366
71.65	0.066667	143.541
71.7	0.266667	170.672
71.75	0.266667	169.469
71.8	1.53333	201.311
71.85	3	227.086
71.9	3	238.017
71.95	3	223.014
72	3	243.278

## Sheet: central_A8425
Time [hrs]	Waking [min/3min]	Bioluminescence	Wake bouts (='1') and sleep bouts (='0')
12.05	3	156.619
12.1	3	162.935
12.15	1.4	158.051	0
12.2	0	144.078	0
12.25	0.533333	152.283	0
12.3	0.333333	155.355	0
12.35	0.733333	161.671	0
12.4	3	148.542	1
12.45	3	152.325	1
12.5	3	135.13	1
12.55	3	129.157	1
12.6	2.6	133.895	1
12.65	0.733333	137.767
12.7	0.333333	129.105
12.75	3	133.132
12.8	3	126.648
12.85	3	125.252
12.9	1	124.902
12.95	0.466667	123.951
13	0.933333	122.978
13.05	3	114.783
13.1	3	118.61
13.15	1.53333	112.726
13.2	0.533333	113.109
13.25	2	112.469
13.3	2.13333	105.474
13.35	0.2	103.257
13.4	0.6	109.017
13.45	2.46667	107.844
13.5	3	104.982
13.55	3	114.009
13.6	3	116.614
13.65	3	123.463
13.7	3	124.535
13.75	2.86667	128.006
13.8	2.8	124.678
13.85	3	119.216
13.9	3	117.754
13.95	2.93333	123.537
14	3	131.408
14.05	3	124.258
14.1	3	134.107
14.15	2.6	144.578
14.2	0.533333	147.761
14.25	1.73333	143.521
14.3	0.733333	152.837
14.35	0.2	156.02
14.4	1.73333	139.892
14.45	3	130.607
14.5	2.53333	125.19
14.55	0.733333	120.084
14.6	0.8	128.755
14.65	0.466667	130.649
14.7	2.46667	117.098
14.75	3	122.037
14.8	3	122.397
14.85	1.4	123.913
14.9	1.46667	130.473
14.95	3	116.945
15	2.46667	124.883
15.05	0.533333	129.799
15.1	1.2	131.915
15.15	3	120.475
15.2	0.466667	126.68
15.25	0.466667	120.729
15.3	0.866667	119.179
15.35	0.533333	122.517
15.4	1.73333	114.099
15.45	3	114.549
15.5	0.8	114.798
15.55	0.533333	115.781
15.6	3	113.674
15.65	3	108.501
15.7	3	127.84
15.75	3	130.356
15.8	2.86667	137.205
15.85	1.26667	139.899
15.9	1.6	128.637
15.95	0.333333	141.997	0
16	0.866667	132.046	0
16.05	1.06667	134.496	0
16.1	0.6	135.189	0
16.15	0.466667	123.683	0
16.2	2.26667	117.71	1
16.25	3	116.471	1
16.3	3	117.409	1
16.35	3	118.547	1
16.4	2	112.796	1
16.45	3	113.268	1
16.5	2.06667	112.695	1
16.55	2.33333	113.966	1
16.6	3	116.171	1
16.65	3	118.309	1
16.7	3	117.292	1
16.75	3	120.03	1
16.8	3	123.591	1
16.85	3	138.04	1
16.9	3	136.711	1
16.95	3	133.872	1
17	0.666667	132.699	0
17.05	0.333333	139.815	0
17.1	0.733333	138.686	0
17.15	3	132.536	1
17.2	3	127.385	1
17.25	3	144.301	1
17.3	3	129.461	1
17.35	2.46667	125.799	1
17.4	2.13333	122.96	1
17.45	0.4	123.031
17.5	2.4	120.925
17.55	3	115.93
17.6	1.53333	116.824
17.65	0.4	113.695
17.7	2.6	111.922
17.75	1	110.994
17.8	0.4	106.887
17.85	1.4	103.003
17.9	0.266667	104.453
17.95	0.133333	105.435
18	1.53333	104.573
18.05	0.266667	107.245
18.1	0.866667	109.272
18.15	2.33333	103.655
18.2	0.2	107.171
18.25	1.26667	106.264
18.3	0.333333	105.847
18.35	1.2	104.141
18.4	2.13333	103.834
18.45	0.333333	104.417
18.5	1.13333	106.022
18.55	2.8	103.782
18.6	0.2	110.743
18.65	0.466667	113.259
18.7	1.46667	120.619
18.75	1.6	117.957
18.8	0.266667	104.34
18.85	0.266667	106.678
18.9	3	118.216
18.95	3	121.665
19	3	120.204
19.05	3	128.097
19.1	3	150.835
19.15	3	133.929
19.2	3	148.89
19.25	3	148.806
19.3	3	157.722
19.35	3	146.482
19.4	3	147.531
19.45	3	151.869
19.5	3	137.874
19.55	3	146.701
19.6	3	135.928
19.65	3	138.4
19.7	3	143.805
19.75	2.8	147.298
19.8	0	142.303
19.85	0	135.93
19.9	0	133.802
19.95	0.8	133.385
20	3	129.634
20.05	2	127.794
20.1	0.133333	110.755
20.15	0.6	106.315
20.2	0	108.587
20.25	0.333333	103.458
20.3	0	105.463
20.35	2.46667	111.357
20.4	0.733333	111.695
20.45	0.4	114.366
20.5	1.06667	110.882
20.55	0.333333	111.332
20.6	0.133333	111.87
20.65	0.4	111.408
20.7	0.533333	109.191
20.75	0.4	108.04
20.8	0.2	105.6
20.85	0.333333	106.494
20.9	0.333333	105.276
20.95	0.533333	105.215
21	3	110.686
21.05	2	106.958
21.1	0.2	108.807	0
21.15	0.333333	102.745	0
21.2	0.333333	110.683	0
21.25	0	110.844	0
21.3	0	105.36	0
21.35	2.26667	106.564	1
21.4	3	107.414	1
21.45	3	104.619	1
21.5	3	104.357	1
21.55	3	107.139	1
21.6	3	111.122	1
21.65	2.86667	109.638	1
21.7	3	109.221	1
21.75	3	109.292	1
21.8	3	110.141	1
21.85	3	105.902	1
21.9	3	104.329	1
21.95	3	106.8	1
22	3	103.427	1
22.05	2.53333	106.588	1
22.1	0.333333	106.171	0
22.15	0.266667	104.486	0
22.2	0.6	101.491	0
22.25	0.666667	104.918	0
22.3	0.333333	102.034	0
22.35	0.133333	103.284	0
22.4	0.733333	100.822	0
22.45	0.4	101.493	0
22.5	0.333333	101.165	0
22.55	0.733333	102.37	0
22.6	0.6	103.041	0
22.65	2.8	102.624	1
22.7	2.6	102.073	1
22.75	1.93333	105.144	1
22.8	0	100.949	0
22.85	0.4	101.065	0
22.9	0.6	104.87	0
22.95	0.2	100.764	0
23	0.4	104.635	0
23.05	0.6	99.9291	0
23.1	0.333333	104.889	0
23.15	0.8	101.45	0
23.2	1.4	100.588	0
23.25	0	101.771	0
23.3	1.53333	104.442
23.35	3	103.358
23.4	3	104.696
23.45	3	104.012
23.5	1.33333	104.973	0
23.55	0.333333	104.422	0
23.6	1.4	104.716	0
23.65	3	105.476	1
23.7	3	105.814	1
23.75	3	105.975	1
23.8	3	104.957	1
23.85	3	107.562	1
23.9	3	110.3	1
23.95	3	109.95	1
24	3	114.443	1
24.05	3	109.959	1
24.1	3	113.786	1
24.15	3	113.902	1
24.2	2.2	111.463	1
24.25	2.93333	115.112	1
24.3	2.53333	112.65	1
24.35	3	114.9	1
24.4	3	111.682	1
24.45	3	112.265	1
24.5	3	111.758	1
24.55	3	110.585	1
24.6	3	111.124	1
24.65	3	106.862	1
24.7	3	114.022	1
24.75	3	112.56	1
24.8	3	108.854	1
24.85	3	110.792	1
24.9	2.66667	116.042	1
24.95	0.133333	117.358	0
25	0.666667	110.785	0
25.05	0.066667	109.901	0
25.1	0.866667	106.328	0
25.15	0	109.821	0
25.2	0	109.937	0
25.25	0.6	106.342	0
25.3	0	105.169	0
25.35	0.333333	108.285	0
25.4	0.333333	108.957	0
25.45	0.533333	109.117	0
25.5	1.33333	107.589	0
25.55	0.466667	107.816	0
25.6	0.666667	107.576	0
25.65	0.6	108.292	0
25.7	0.6	105.986	0
25.75	0.933333	107.168	0
25.8	0.333333	106.729	0
25.85	1.53333	107.222
25.9	0.933333	108.116	0
25.95	0.133333	104.81	0
26	0.333333	106.926	0
26.05	0.933333	106.175	0
26.1	0.6	106.136	0
26.15	0.6	108.985	0
26.2	2.6	102.567	1
26.25	2.4	110.017	1
26.3	2.8	104.666	1
26.35	3	105.76	1
26.4	3	106.098	1
26.45	3	102.325	1
26.5	3	105.952	1
26.55	3	101.024	1
26.6	3	109.162	1
26.65	3	107.656	1
26.7	3	110.794	1
26.75	3	109.443	1
26.8	3	108.048	1
26.85	3	112.275	1
26.9	1.46667	110.635	0
26.95	0.066667	112.062	0
27	0.2	108.289	0
27.05	0.6	108.65	0
27.1	0.2	113.233	0
27.15	0.466667	107.082	0
27.2	0.133333	109.82	0
27.25	0.733333	107.736	0
27.3	0.6	106.096	0
27.35	0.333333	105.657	0
27.4	0	105.417	0
27.45	1.06667	107.266	0
27.5	0	107.271	0
27.55	0	104.632	0
27.6	0.533333	107.503	0
27.65	0.4	106.152	0
27.7	0.266667	104.891	0
27.75	0.733333	108.895	0
27.8	0.333333	108.567	0
27.85	0.666667	106.238	0
27.9	0.666667	104.599	0
27.95	1.26667	104.804	0
28	0.133333	105.831	0
28.05	0.733333	105.347	0
28.1	2.33333	105.396
28.15	0.266667	105.956
28.2	0.2	103.917
28.25	0.533333	104.322
28.3	0.6	109.215
28.35	0.333333	104.265
28.4	0.333333	105.936
28.45	0	105.385
28.5	0.8	103.501
28.55	0	101.973
28.6	0.466667	103.555
28.65	0	106.227
28.7	0.666667	101.987
28.75	0.6	105.348
28.8	0.533333	102.064
28.85	0.266667	103.535
28.9	0.733333	106.251
28.95	0.533333	104.012
29	0.466667	104.55
29.05	0.666667	105.777
29.1	0.933333	101.604
29.15	0.333333	103.609
29.2	0.666667	100.28
29.25	0.533333	103.507
29.3	0.533333	99.2677
29.35	2.6	107.561	1
29.4	3	103.144	1
29.45	3	101.527	1
29.5	2.93333	105.22	1
29.55	0.4	107.07	0
29.6	0.133333	106.697	0
29.65	0.733333	105.857	0
29.7	0.4	101.195	0
29.75	0.733333	99.3113	0
29.8	0.066667	105.583	0
29.85	0.4	104.254	0
29.9	0.2	103.793	0
29.95	0.333333	102.242	0
30	0.133333	101.647	0
30.05	0.4	101.852	0
30.1	0	102.945	0
30.15	0.466667	105.217	0
30.2	0.266667	98.1326	0
30.25	2.2	103.871
30.3	0.333333	100.92	0
30.35	0.066667	100.014	0
30.4	0.133333	101.33	0
30.45	0.333333	99.8013	0
30.5	0	104.073	0
30.55	0	103.989	0
30.6	0.333333	102.882	0
30.65	3	103.51	1
30.7	3	107.292	1
30.75	3	106.297	1
30.8	3	104.057	1
30.85	3	109.573	1
30.9	3	110.267	1
30.95	3	112.005	1
31	3	114.899	1
31.05	3	116.171	1
31.1	3	119.464	1
31.15	3	117.136	1
31.2	2.33333	116.852	1
31.25	0.266667	114.923	0
31.3	0.466667	118.817	0
31.35	0.133333	120.489	0
31.4	0.466667	112.449	0
31.45	0.066667	115.32	0
31.5	0.133333	110.77	0
31.55	0.2	110.197	0
31.6	0.6	110.313	0
31.65	0.333333	107.606	0
31.7	0.333333	103.056	0
31.75	0.133333	102.816	0
31.8	0.133333	98.9098	0
31.85	0.8	106.07	0
31.9	0.266667	101.053	0
31.95	2	108.124
32	0.8	104.885	0
32.05	0.4	102.067	0
32.1	0.2	102.383	0
32.15	0.6	105.388	0
32.2	0.466667	104.037	0
32.25	0.333333	102.598	0
32.3	0.466667	103.669	0
32.35	0.333333	103.808	0
32.4	1	102.435	0
32.45	0.266667	102.906	0
32.5	0.866667	103.533	0
32.55	1	103.338	0
32.6	0	97.4984	0
32.65	2.06667	104.237	1
32.7	3	101.197	1
32.75	3	105.069	1
32.8	3	101.384	1
32.85	3	109.7	1
32.9	3	109.328	1
32.95	3	108.088	1
33	3	110.07	1
33.05	3	112.364	1
33.1	3	119.525	1
33.15	2.8	116.863	1
33.2	2	118.023	1
33.25	0.066667	111.828	0
33.3	0.266667	114.233	0
33.35	0.2	120.571	0
33.4	0.333333	115.465	0
33.45	0.333333	107.892	0
33.5	0.266667	104.897	0
33.55	0	103.901	0
33.6	0.266667	113.24	0
33.65	0.533333	113.178	0
33.7	0.6	106.405	0
33.75	0.4	105.832	0
33.8	0.266667	104.57	0
33.85	0.733333	109.153	0
33.9	0	105.624	0
33.95	0.533333	102.274	0
34	0.133333	102.389	0
34.05	1.26667	101.194	0
34.1	1.06667	104.332	0
34.15	0.133333	102.537	0
34.2	0.333333	104.365	0
34.25	0.333333	99.3693	0
34.3	0.533333	103.374	0
34.35	0.733333	104.001	0
34.4	3	102.606	1
34.45	3	102.3	1
34.5	3	103.082	1
34.55	2.8	102.198	1
34.6	1.6	105.737	1
34.65	0.2	97.5414	0
34.7	0.133333	100.124	0
34.75	0.733333	105.462	0
34.8	0.6	107.756	0
34.85	0.466667	104.739	0
34.9	0.733333	107.388	0
34.95	0	101.281	0
35	1.66667	104.686
35.05	0.133333	105.202
35.1	0.266667	102.096
35.15	0.066667	98.9453
35.2	0.333333	102.106
35.25	0.4	104.4
35.3	0.4	103.049
35.35	0.666667	100.854
35.4	0.866667	104.481
35.45	1	102.508
35.5	1.46667	101.29
35.55	3	103.962
35.6	3	103.056
35.65	1	106.238
35.7	0.266667	105.554
35.75	1.33333	108.292
35.8	3	112.675
35.85	3	111.08
35.9	3	117.818
35.95	3	112.756
36	1	114.428
36.05	0.2	110.944
36.1	0.466667	109.26
36.15	1.4	117.02
36.2	3	126.291
36.25	3	125.541
36.3	2.53333	127.835
36.35	2.93333	128.35
36.4	0.133333	111.044
36.45	0.466667	132.205
36.5	2.4	131.698
36.55	3	129.792
36.6	2.8	126.864
36.65	0.933333	137.868
36.7	3	136.251
36.75	3	148.189
36.8	3	158.283
36.85	3	138.243
36.9	0.4	139.781
36.95	0.333333	142.208
37	1.66667	132.947
37.05	2.06667	127.796
37.1	2	121.379
37.15	2.66667	128.65
37.2	1.6	127.611
37.25	0.333333	129.949
37.3	0.8	129.62
37.35	0.666667	130.181
37.4	3	134.185
37.45	1.06667	133.546
37.5	1.66667	136.484
37.55	0.733333	129.933
37.6	2.6	130.894
37.65	2.73333	132.432
37.7	2	130.214
37.75	2.73333	126.197
37.8	3	133.291
37.85	1.4	128.162
37.9	2.33333	125.145
37.95	2.93333	127.728
38	3	141.044
38.05	3	142.871
38.1	3	137.209
38.15	2.66667	119.058
38.2	3	122.374
38.25	0.866667	126.379
38.3	0.266667	128.939
38.35	2.26667	129.055
38.4	3	128.216
38.45	0.666667	118.643
38.5	1.6	121.203
38.55	3	125.319
38.6	3	123.813
38.65	1.73333	125.862
38.7	1.26667	126.823
38.75	2.13333	126.872	1
38.8	3	128.277	1
38.85	3	139.081	1
38.9	2.33333	126.597	1
38.95	0.933333	132.38	0
39	0.466667	131.674	0
39.05	1.26667	130.701	0
39.1	1.26667	122.617	0
39.15	1.33333	128.088	0
39.2	3	123.737	1
39.25	3	128.476	1
39.3	3	134.947	1
39.35	3	133.308	1
39.4	1.93333	134.446	1
39.45	3	145.54	1
39.5	3	155.789	1
39.55	3	157.549	1
39.6	3	152.198	1
39.65	3	153.559	1
39.7	1.93333	140.941	1
39.75	0.666667	144.502
39.8	3	133.285
39.85	3	128.934
39.9	3	136.961
39.95	1.6	126.566
40	0.6	126.348
40.05	0.733333	124.531
40.1	0.4	126.358
40.15	2.53333	118.163
40.2	3	121.19
40.25	3	123.195
40.3	0.866667	134.6
40.35	3	131.316
40.4	1.53333	130.254
40.45	2.2	134.947
40.5	3	135.975
40.55	2.93333	144.735
40.6	3	139.806
40.65	1.06667	134.811
40.7	1.13333	135.794
40.75	0.533333	136.376
40.8	0.466667	142.315
40.85	1.8	123.519
40.9	2.66667	125.324
40.95	3	124.796
41	1.4	123.379
41.05	1	132.383
41.1	2.33333	128.41
41.15	3	136.726
41.2	3	138.82
41.25	1.06667	131.225	0
41.3	1.13333	141.919	0
41.35	0.8	144.59	0
41.4	2.13333	138.595	1
41.45	3	141.711	1
41.5	3	150.338	1
41.55	3	139.987	1
41.6	2.8	137.37	1
41.65	2.93333	143.73	1
41.7	0.666667	140.38
41.75	0.6	149.096
41.8	1.93333	144.3
41.85	2.66667	142.75
41.9	3	147.421
41.95	3	153.804
42	3	152.609
42.05	3	136.747
42.1	2	140.663
42.15	0.866667	141.801
42.2	1	145.717
42.25	0.4	133.988
42.3	2.66667	136.615
42.35	3	137.709
42.4	0.8	135.159	0
42.45	0.8	139.763	0
42.5	0.6	139.213	0
42.55	0.666667	136.729	0
42.6	0.733333	131	0
42.65	2.93333	126.76	1
42.7	3	131.343	1
42.75	3	129.126	1
42.8	3	133.064	1
42.85	3	138.78	1
42.9	3	141.718	1
42.95	3	136.856	1
43	3	142.972	1
43.05	3	142.688	1
43.1	2.33333	136.515	1
43.15	1.06667	144.209
43.2	0.333333	143.903
43.25	0.2	144.596
43.3	2.46667	136.979
43.35	2.6	134.851
43.4	0.066667	122.033	0
43.45	0.266667	117.327	0
43.5	1.13333	122.354	0
43.55	3	117.759	1
43.6	3	124.208	1
43.65	3	126.546	1
43.7	3	122.218	1
43.75	3	126.845	1
43.8	3	133.427	1
43.85	3	137.677	1
43.9	3	141.304	1
43.95	2.4	141.798	1
44	0.8	138.202	0
44.05	0.733333	134.94	0
44.1	0.6	125.679	0
44.15	0.533333	126.661	0
44.2	0.266667	125.977	0
44.25	1.13333	124.449	0
44.3	3	123.409	1
44.35	3	122.214	1
44.4	3	125.641	1
44.45	2.06667	128.09	1
44.5	0.2	122.051	0
44.55	0.4	114.9	0
44.6	0.533333	117.372	0
44.65	0.6	117.465	0
44.7	0.666667	114.87	0
44.75	0.333333	116.164	0
44.8	0.4	117.569	0
44.85	0.733333	118.04	0
44.9	1.2	114.09	0
44.95	3	115.717	1
45	3	121.588	1
45.05	3	118.66	1
45.1	3	121.309	1
45.15	3	121.003	1
45.2	3	125.052	1
45.25	3	125.19	1
45.3	3	140.862	1
45.35	3	136.444	1
45.4	3	159.293	1
45.45	3	150.876	1
45.5	3	154.259	1
45.55	3	153.93	1
45.6	3	161.624	1
45.65	3	160.495	1
45.7	3	154.834	1
45.75	2.33333	149.994	1
45.8	0.666667	128.799
45.85	1.93333	140.582
45.9	0.333333	129.942
45.95	0.666667	135.391
46	0.133333	144.196
46.05	0.533333	139.245
46.1	0.266667	132.806
46.15	0.4	120.166
46.2	1.46667	123.993
46.25	3	127.087
46.3	1.46667	125.492	0
46.35	0.333333	121.83	0
46.4	1.2	122.39	0
46.45	1.13333	115.973	0
46.5	0.866667	114.422	0
46.55	2.86667	115.383	1
46.6	3	116.521	1
46.65	3	119.37	1
46.7	3	114.464	1
46.75	3	116.913	1
46.8	1.73333	112.562	1
46.85	0.266667	112.145
46.9	0.266667	109.994
46.95	0.666667	106.132
47	2.33333	109.048
47.05	2.93333	112.898
47.1	1.66667	114.036
47.15	0.6	112.952
47.2	0.666667	109.89
47.25	0.133333	110.25
47.3	0.933333	112.433
47.35	3	113.838
47.4	3	113.421
47.45	0.133333	117.07	0
47.5	0.533333	104.697	0
47.55	0.8	111.324	0
47.6	2.2	108.484	1
47.65	3	114.289	1
47.7	3	113.783	1
47.75	3	110.921	1
47.8	3	111.659	1
47.85	3	113.953	1
47.9	3	111.491	1
47.95	3	111.207	1
48	2.86667	109.368	1
48.05	3	109.15	1
48.1	2.6	112.577	1
48.15	0.6	114.315	0
48.2	0.2	109.631	0
48.25	1.26667	110.858	0
48.3	0.533333	110.974	0
48.35	0.266667	105.89	0
48.4	0.466667	110.517	0
48.45	1.93333	111.456
48.5	2.93333	110.416
48.55	1.2	109.198
48.6	0.466667	110.181
48.65	0.333333	108.83
48.7	1.66667	101.991
48.75	1.8	107.796
48.8	0.066667	108.156
48.85	0.8	108.739
48.9	0.266667	110.788
48.95	0.333333	108.193
49	0.333333	106.398
49.05	0.8	105.158
49.1	0.066667	109.319
49.15	0.533333	103.768
49.2	0.2	103.928
49.25	0.333333	106.644
49.3	0.133333	104.227
49.35	0	106.632
49.4	1.06667	104.481
49.45	0.266667	104.419
49.5	0.266667	103.691
49.55	0.266667	104.273
49.6	0.133333	103.345
49.65	0.333333	104.372
49.7	0.6	103.843
49.75	0.066667	104.381
49.8	0.333333	105.164
49.85	0.933333	101.369
49.9	0.8	106.774
49.95	1.46667	98.4452
50	1.26667	104.05
50.05	3	105.588
50.1	3	106.171
50.15	3	107.776
50.2	0.866667	108.358
50.25	3	105.052	1
50.3	3	104.635	1
50.35	3	102.017	1
50.4	3	112.333	1
50.45	3	100.027	1
50.5	3	104.632	1
50.55	3	110.57	1
50.6	3	109.064	1
50.65	3	110.38	1
50.7	3	114.251	1
50.75	3	114.078	1
50.8	3	108.927	1
50.85	2.46667	111.288	1
50.9	0.133333	111.937	0
50.95	0.333333	114.409	0
51	0.2	111.636	0
51.05	0.533333	110.352	0
51.1	0.266667	108.023	0
51.15	0.4	105.584	0
51.2	0.666667	103.655	0
51.25	0.466667	109.527	0
51.3	0.266667	108.754	0
51.35	0.466667	106.448	0
51.4	0	106.674	0
51.45	1.13333	106.191	0
51.5	0.066667	110.151	0
51.55	0.333333	108.4	0
51.6	0.2	105.872	0
51.65	0.933333	101.632	0
51.7	0.666667	106.059	0
51.75	0.333333	108.197	0
51.8	0	107.335	0
51.85	1.86667	104.429	1
51.9	3	109.301	1
51.95	3	107.75	1
52	3	105.333	1
52.05	3	103.204	1
52.1	3	108.72	1
52.15	3	110.347	1
52.2	1.6	108.819	1
52.25	0.2	103.735	0
52.3	0.333333	105.54	0
52.35	0.8	105.655	0
52.4	0.466667	105.616	0
52.45	0.2	108.554	0
52.5	0.466667	106.403	0
52.55	0.066667	105.675	0
52.6	0	105.902	0
52.65	0.333333	107.64	0
52.7	0.266667	105.267	0
52.75	0.466667	107.072	0
52.8	0.333333	106.01	0
52.85	0.466667	104.193	0
52.9	0.133333	101.575	0
52.95	1.66667	107.869
53	0.066667	105.852	0
53.05	0.4	102.034	0
53.1	0.4	104.884	0
53.15	0	104.222	0
53.2	1.13333	107.693	0
53.25	0.133333	104.409	0
53.3	3	109.436	1
53.35	2.86667	100.908	1
53.4	2.46667	107.468	1
53.45	3	107.873	1
53.5	1.66667	106.522	1
53.55	0.133333	107.194	0
53.6	0.466667	102.31	0
53.65	0.266667	106.759	0
53.7	0.666667	105.897	0
53.75	0.333333	106.858	0
53.8	0.933333	106.218	0
53.85	0.866667	103.245	0
53.9	0.266667	106.494	0
53.95	0.333333	103.099	0
54	0.4	104.148	0
54.05	0	100.531	0
54.1	1.26667	102.314	0
54.15	0.466667	105.563	0
54.2	0.2	106.39	0
54.25	0.333333	105.128	0
54.3	0.333333	105.133	0
54.35	0.266667	104.36	0
54.4	1.13333	104.609	0
54.45	0.8	103.437	0
54.5	0.6	106.597	0
54.55	0.466667	100.824	0
54.6	0.6	102.296	0
54.65	0.333333	103.345	0
54.7	0.2	106.95	0
54.75	0	102.377	0
54.8	0.666667	98.3149	0
54.85	3	98.542
54.9	2.66667	100.369
54.95	0.733333	100.24	0
55	0.733333	99.7787	0
55.05	0.133333	108.272	0
55.1	0.266667	105.744	0
55.15	0.4	107.571	0
55.2	0.466667	100.309	0
55.25	0.266667	103.025	0
55.3	0.2	99.2966	0
55.35	0.8	102.235	0
55.4	0.333333	100.284	0
55.45	0.466667	103.222	0
55.5	0.333333	101.383	0
55.55	1.13333	104.254	0
55.6	3	103.081	1
55.65	3	103.997	1
55.7	3	104.713	1
55.75	3	109.207	1
55.8	3	111.367	1
55.85	3	114.483	1
55.9	3	109.466	1
55.95	3	118.671	1
56	3	122.898	1
56.05	3	113.103	1
56.1	3	118.663	1
56.15	2.8	116.335	1
56.2	0.333333	107.406	0
56.25	0.133333	105.877	0
56.3	0	109.638	0
56.35	0.2	103.843	0
56.4	0.4	109.337	0
56.45	0.4	127.43	0
56.5	0.066667	123.746	0
56.55	0	126.373	0
56.6	0.666667	123.4	0
56.65	0.933333	123.427	0
56.7	0.8	121.188	0
56.75	0.066667	116.681	0
56.8	0.266667	117.309	0
56.85	0.533333	112.002	0
56.9	0.266667	111.252	0
56.95	0.2	108.101	0
57	0.8	104.506	0
57.05	1.13333	107.666	0
57.1	2.66667	110.049	1
57.15	2.53333	105.454	1
57.2	3	107.481	1
57.25	2.93333	107.041	1
57.3	2.33333	104.535	1
57.35	0.266667	100.695	0
57.4	0	96.3	0
57.45	0.133333	100.816	0
57.5	0.266667	95.5541	0
57.55	0.666667	99.2701	0
57.6	0.6	102.875	0
57.65	0.4	99.0798	0
57.7	0.466667	101.351	0
57.75	0.6	97.7117	0
57.8	1	98.0721	0
57.85	0.533333	102.388	0
57.9	0.666667	97.0373	0
57.95	0.466667	99.2644	0
58	2.33333	99.7359
58.05	2.8	99.2963
58.1	0.466667	97.1678	0
58.15	0.133333	95.1949	0
58.2	0.4	96.9108	0
58.25	0.4	101.271	0
58.3	0.2	98.8538	0
58.35	1.66667	99.0587	1
58.4	2.86667	98.5302	1
58.45	3	95.6017	1
58.5	3	100.162	1
58.55	2.06667	99.0114	1
58.6	0.066667	97.6607	0
58.65	0.466667	102.11	0
58.7	0.466667	108.181	0
58.75	0.333333	105.564	0
58.8	0.333333	102.213	0
58.85	0.266667	101.729	0
58.9	1	99.2453	0
58.95	0.8	102.095	0
59	0.4	106.144	0
59.05	0.8	97.1487	0
59.1	0.4	99.2646	0
59.15	0.6	103.87	0
59.2	1	98.9632	0
59.25	3	98.9014	1
59.3	3	97.884	1
59.35	2.26667	98.1333	1
59.4	0.266667	93.027	0
59.45	0.133333	101.21	0
59.5	0.8	106.726	0
59.55	0.6	108.753	0
59.6	0.866667	103.491	0
59.65	1.46667	97.7179	0
59.7	3	99.545	1
59.75	3	103.083	1
59.8	3	107.444	1
59.85	3	113.293	1
59.9	3	116.364	1
59.95	1.13333	109.547	0
60	0.2	115.063	0
60.05	1.06667	117.179	0
60.1	0.2	118.895	0
60.15	0.8	113.1	0
60.2	1.4	117.082	0
60.25	3	116.376
60.3	3	114.67
60.35	2.86667	125.852
60.4	0.4	121.213
60.45	0.6	123.729
60.5	3	123.2
60.55	2.4	117.561
60.6	2.13333	126.343
60.65	3	119.126
60.7	2.13333	126.62
60.75	2.86667	130.313
60.8	1.4	126.185
60.85	0.733333	127.945
60.9	2.93333	137.417
60.95	3	136.822
61	3	138.426
61.05	0.733333	140.498
61.1	1.66667	137.481
61.15	3	133.485
61.2	1.26667	126.224
61.25	3	137.739
61.3	3	146.389
61.35	3	155.083
61.4	3	133.065
61.45	1.53333	125.559
61.5	3	139.097
61.55	0.666667	124.502
61.6	1.06667	122.662
61.65	2.86667	114.445
61.7	2.86667	127.983
61.75	3	127.521
61.8	2.2	124.904
61.85	2.53333	134.509
61.9	0.533333	124.58
61.95	2.93333	137.63
62	3	127.901
62.05	0.533333	116.284
62.1	3	130.933
62.15	3	136.871
62.2	3	141.965
62.25	3	144.436
62.3	2.66667	125.441
62.35	2.46667	120.846
62.4	1.93333	121.584
62.45	0.466667	122.989	0
62.5	1.06667	117.549	0
62.55	1.46667	116.132	0
62.6	3	121.426	1
62.65	3	121.542	1
62.7	3	128.924	1
62.75	3	124.662	1
62.8	3	120.09	1
62.85	3	114.206	1
62.9	2	120.433	1
62.95	3	124.171	1
63	1.13333	118.731
63.05	1.2	125.625
63.1	3	122.763
63.15	1.53333	128.768
63.2	0.6	120.24
63.25	0.533333	122.933
63.3	0.466667	119.516
63.35	1.73333	117.165
63.4	1.2	119.903
63.45	3	116.864
63.5	1.33333	111.713
63.55	0.6	110.407
63.6	2.73333	113.523
63.65	3	117.728
63.7	2.2	110.51
63.75	2.86667	116.359
63.8	0.4	112.898
63.85	1.6	112.725
63.9	0.533333	116.152
63.95	0.733333	118.379
64	2.8	119.25
64.05	0.866667	119.277
64.1	0.466667	117.127
64.15	2.26667	114.554
64.2	2.46667	121.425
64.25	1.6	123.874
64.3	2.53333	129.457
64.35	1.4	126.973
64.4	3	140.622
64.45	3	132.094
64.5	1.2	125.343
64.55	1.33333	129.392
64.6	3	131.953
64.65	1.66667	115.424
64.7	2.26667	122.251
64.75	3	120.856
64.8	3	119.106
64.85	3	127.71
64.9	3	140.515
64.95	3	141.009
65	3	131.08
65.05	3	124.063
65.1	1.73333	126.49
65.15	0.866667	123.784
65.2	1	130.433
65.25	1.73333	126.127
65.3	3	127.043
65.35	2.6	133.759
65.4	3	133.875
65.45	1.73333	131.013
65.5	1.6	129.573
65.55	0.866667	124.8
65.6	1.06667	125.361
65.65	3	120.21	1
65.7	3	122.082	1
65.75	1.66667	126.175	1
65.8	2.8	124.247	1
65.85	3	124.807	1
65.9	3	143.523	1
65.95	3	150.684	1
66	3	144.755	1
66.05	3	139.293	1
66.1	3	132.409	1
66.15	3	138.347	1
66.2	3	134.863	1
66.25	2.86667	135.135	1
66.3	2	135.606	1
66.35	0.333333	120.522	0
66.4	0.6	130.149	0
66.45	0.6	129.332	0
66.5	0.4	134.203	0
66.55	0.066667	115.897	0
66.6	0.4	122.702	0
66.65	1.93333	125.574
66.7	3	126.778
66.75	3	122.317
66.8	3	116.855
66.85	1.4	116.326
66.9	2.8	118.487
66.95	3	123.78
67	3	120.141
67.05	3	121.146
67.1	3	130.728
67.15	3	138.577
67.2	3	146.338
67.25	3	146.52
67.3	3	152.637
67.35	3	150.13
67.4	3	148.335
67.45	3	150.629
67.5	3	149.456
67.55	3	146.839
67.6	2.06667	139.821
67.65	0	138.937
67.7	0.333333	122.942
67.75	1.73333	124.569
67.8	0.8	124.752
67.85	0.533333	125.779
67.9	1.06667	116.739
67.95	3	136.677
68	3	130.815
68.05	0.6	126.354	0
68.1	0.8	122.847	0
68.15	0.733333	123.186	0
68.2	0.733333	119.057	0
68.25	0.4	117.795	0
68.3	0.6	117.8	0
68.35	0.466667	122.383	0
68.4	2.73333	120.632	1
68.45	3	123.703	1
68.5	3	118.642	1
68.55	3	118.335	1
68.6	3	120.318	1
68.65	3	118.501	1
68.7	3	119.394	1
68.75	3	120.155	1
68.8	3	117.071	1
68.85	1.93333	114.675	1
68.9	0.866667	112.858	0
68.95	0.466667	113.685	0
69	0.666667	113.379	0
69.05	0.6	117.917	0
69.1	0.733333	113.211	0
69.15	0.066667	113.371	0
69.2	2.93333	118.287	1
69.25	3	118.048	1
69.3	3	116.297	1
69.35	1	108.746	0
69.4	0.8	112.44	0
69.45	0.2	108.734	0
69.5	1	112.672	0
69.55	0.4	111.032	0
69.6	0.333333	114.037	0
69.65	2.33333	113.131	1
69.7	3	110.158	1
69.75	2	113.385	1
69.8	1.26667	113.679	0
69.85	0.466667	110.039	0
69.9	0.666667	109.466	0
69.95	1.26667	111.227	0
70	0.466667	111.431	0
70.05	2.66667	110.636	1
70.1	3	110.419	1
70.15	3	110.557	1
70.2	3	108.54	1
70.25	3	107.767	1
70.3	3	110.349	1
70.35	2.6	107.665	1
70.4	0.466667	105.848	0
70.45	0.666667	109.297	0
70.5	0.866667	111.991	0
70.55	0.533333	105.751	0
70.6	0.466667	107.867	0
70.65	0.533333	112.85	0
70.7	0.6	107.144	0
70.75	0.8	111.415	0
70.8	2.8	110.375	1
70.85	1.8	114.247	1
70.9	2	112.963	1
70.95	2.4	111.501	1
71	3	113.439	1
71.05	1.33333	109.2
71.1	0.733333	111.538
71.15	2.13333	110.92
71.2	3	110.125
71.25	1.06667	109.864
71.3	0.4	109.757
71.35	2.06667	109.384
71.4	3	111.611
71.45	2.6	116.394
71.5	0.733333	111.421
71.55	0.866667	110.493
71.6	2.93333	109.253
71.65	3	105.258
71.7	3	109.552
71.75	3	110.045
71.8	3	112.761
71.85	3	108.188
71.9	3	113.549
71.95	3	112.242
72	3	121.158
