# Supplementary material for: The sleep-wake distribution contributes to the peripheral rhythms in PERIOD-2
Source: eLife. 2021 Dec 13;10:e69773. doi: 10.7554/eLife.69773 (PMC8798053; doi:10.7554/eLife.69773)
Supplement: Figure 1—figure supplement 5—source data 1. [file elife-69773-fig1-figsupp5-data1.xlsx]

## Sheet: Suppl.Fig.5A
	PER2Luc						CAG-Luc						Pkg1-Luc
	time	photons	activity	transitions [WS + SW]			time	photons	activity	transitions [WS + SW]			time	photons	activity	transitions [WS + SW]
	[3min intervals]	[/3min/mean biolum]	[movements/3min]	time [3min]	wake [10] or sleep [0]		[3min intervals]	[/3min/mean biolum]	[movements/3min]	time [3min]	wake [10] or sleep [0]		[3min intervals]	[/3min/mean biolum]	[movements/3min]	time [3min]	wake [10] or sleep [0]
	1	0.8348	97	1	10		1	0.9806	16	14	10		1	1.069	120	118	10
	2	0.9594	124	2	10		2	0.9734	27	15	10		2	0.938	8	119	10
	3	0.8247	97	3	10		3	0.9006	65	16	10		3	1.0221	50	120	10
	4	0.8828	110	4	10		4	0.9028	58	17	0		4	1.0512	80	121	10
	5	0.9357	47	5	0		5	1.0117	95	18	0		5	1.0349	86	122	10
	6	0.9054	17	6	0		6	1.0166	80	19	0		6	1.0421	92	123	10
	7	0.8989	2	7	0		7	0.9335	107	20	0		7	0.9131	4	124	10
	8	0.8928	3	8	0		8	1.152	72	21	0		8	0.9415	58	125	10
	9	0.8997	7	9	0		9	1.3758	49	22	0		9	1.0081	117	126	10
	10	0.8593	2	10	0		10	1.3444	68	23	0		10	0.9193	135	127	10
	11	0.8666	41	29	10		11	1.4049	92	24	0		11	1.0079	117	128	10
	12	0.8431	0	30	10		12	1.4863	31	25	0		12	1.0043	127	129	10
	13	0.8614	0	31	10		13	1.1458	35	26	0		13	1.0075	150	130	10
	14	0.8432	3	32	10		14	1.0401	57	44	10		14	1.0137	129	131	10
	15	0.8157	75	33	0		15	1.1976	52	45	10		15	1.0145	148	132	10
	16	0.7715	98	34	0		16	1.2558	111	46	10		16	0.9996	130	133	10
	17	0.8326	55	35	0		17	0.9604	92	47	10		17	1.0263	137	134	10
	18	0.8004	40	36	0		18	0.8084	29	48	10		18	1.026	136	135	10
	19	0.864	50	37	0		19	0.7626	12	49	10		19	0.9854	137	136	10
	20	0.9274	55	38	0		20	0.6715	14	50	10		20	1.0267	139	137	10
	21	0.992	4	39	0		21	0.6305	4	51	0		21	1.0828	137	138	10
	22	0.9657	2	40	0		22	0.8275	0	52	0		22	1.0834	76	139	10
	23	0.9433	1	41	0		23	0.7341	3	53	0		23	1.0267	144	140	10
	24	0.8771	5	42	10		24	0.6316	28	54	0		24	1.0379	113	141	10
	25	0.8578	83	43	10		25	0.4284	0	55	0		25	1.0709	139	142	10
	26	0.8396	90	44	10		26	0.3864	24	56	0		26	1.0435	128	143	10
	27	0.8026	14	45	10		27	0.7644	70	57	0		27	1.0975	141	144	10
	28	0.8321	25	46	0		28	0.9994	116	58	0		28	1.1221	110	145	10
	29	0.9355	137	47	0		29	0.9554	131	59	0		29	1.0615	107	146	10
	30	0.9798	114	48	0		30	0.9676	104	60	0		30	1.0597	77	147	10
	31	1.0311	98	49	0		31	0.8059	76	61	0		31	1.0362	82	148	10
	32	0.9777	110	50	0		32	0.8103	58	62	0		32	1.0986	118	149	10
	33	1.0018	123	51	0		33	1.1274	141	63	0		33	1.0449	116	150	10
	34	1.09	10	52	0		34	1.0875	126	64	0		34	1.0139	51	151	10
	35	1.0774	2	53	10		35	0.9582	100	65	0		35	0.9998	88	152	10
	36	1.0619	3	54	10		36	1.1198	116	66	0		36	1.0053	130	153	10
	37	1.0507	15	55	10		37	1.2558	132	67	0		37	0.9902	61	154	10
	38	1.0185	10	56	10		38	1.5699	81	68	0		38	1.0446	68	155	10
	39	0.9784	7	57	0		39	1.7205	92	69	0		39	1.0309	142	156	10
	40	0.9536	12	58	0		40	2.2813	88	70	0		40	1.0234	137	157	10
	41	0.9472	21	59	0		41	2.1279	25	71	0		41	1.0438	136	158	10
	42	0.8644	96	60	0		42	1.8506	0	72	0		42	1.0502	128	159	0
	43	0.8438	113	61	0		43	1.5463	34	73	0		43	1.0097	149	160	0
	44	0.7923	100	62	0		44	1.2212	49	74	0		44	1.0144	143	161	0
	45	0.8894	166	63	0		45	1.0242	59	75	0		45	1.0696	136	162	0
	46	0.9668	50	64	0		46	1.1279	75	76	0		46	1.0604	151	163	0
	47	1.0206	7	65	0		47	1.0776	54	77	0		47	1.0398	138	164	0
	48	1.0029	19	86	10		48	1.1679	76	78	0		48	1.0846	135	165	0
	49	0.9796	0	87	10		49	1.5221	109	79	0		49	1.0714	121	166	0
	50	0.9264	33	88	10		50	1.28	66	80	0		50	1.0374	95	167	0
	51	0.9885	21	89	10		51	1.0587	60	81	0		51	1.0403	148	168	0
	52	0.9562	10	90	10		52	0.966	6	82	0		52	1.0335	139	169	0
	53	0.9201	93	91	10		53	0.8579	0	83	0		53	1.0392	128	170	0
	54	0.8823	130	92	10		54	0.7671	0	101	10		54	1.1064	111	171	0
	55	0.9128	69	93	0		55	0.6269	17	102	10		55	1.0965	127	172	0
	56	0.9185	91	94	0		56	0.5486	2	103	0		56	1.0191	104	173	0
	57	0.9736	52	95	0		57	0.4472	36	104	0		57	1.0664	93	174	0
	58	1.0078	0	96	0		58	0.4803	0	105	0		58	1.0271	93	175	0
	59	1.0528	0	97	0		59	0.4053	0	106	0		59	0.9865	144	176	0
	60	1.0141	0	98	0		60	0.4403	9	107	0		60	1.0458	122	177	0
	61	0.9633	0	99	0		61	0.3803	5	108	0		61	1.0281	91	178	0
	62	0.9296	0	100	0		62	0.3333	0	109	0		62	1.0083	130	179	0
	63	0.907	0	101	0		63	0.3253	2	110	0		63	1.0154	134	180	0
	64	0.874	11	102	0		64	0.3171	5	111	0		64	1.0127	135	181	0
	65	0.7875	7	103	0		65	0.3333	3	112	0		65	0.9891	126	226	10
	66	0.9876	40	104	0		66	0.3779	4	113	0		66	0.9841	139	227	10
	67	0.9393	125	105	10		67	0.4441	0	114	0		67	0.952	130	228	10
	68	1.0418	76	106	10		68	0.4382	0	115	0		68	0.9248	69	229	10
	69	1.0315	108	107	10		69	0.4761	2	116	0		69	0.9758	109	230	10
	70	1.1171	100	108	0		70	0.4665	3	117	0		70	1.0306	149	231	10
	71	1.0141	118	109	0		71	0.5201	0	118	0		71	1.0241	105	232	10
	72	1.1007	29	110	0		72	0.5729	14	119	0		72	1.004	112	233	10
	73	1.1315	110	111	0		73	0.5198	19	120	0		73	1.0186	134	234	10
	74	1.3135	46	112	0		74	0.407	0	121	0		74	0.9893	135	235	10
	75	1.3389	0	113	0		75	0.401	16	122	0		75	0.9735	124	236	10
	76	1.3173	13	114	0		76	0.5931	0	123	0		76	0.9745	127	237	10
	77	1.2629	3	115	0		77	0.6837	3	124	0		77	0.9847	152	238	10
	78	1.2363	14	116	0		78	0.6959	3	125	0		78	0.9835	146	239	10
	79	1.0856	1	117	0		79	0.6651	2	126	0		79	0.9717	125	240	10
	80	1.0026	53	118	0		80	0.6441	5	170	10		80	0.9928	131	241	10
	81	0.9616	114	119	0		81	0.6214	0	171	10		81	0.9617	108	242	0
	82	1.0063	80	130	10		82	0.6379	0	172	10		82	0.978	96	243	0
	83	1.0695	54	131	10		83	0.6376	17	173	10		83	1.0294	89	244	0
	84	1.1382	2	132	10		84	0.4952	55	174	10		84	1.0407	124	245	0
	85	1.1088	0	133	10		85	0.8229	31	175	10		85	1.0488	135	246	0
	86	1.0743	46	134	0		86	1.5984	71	176	10		86	1.0314	92	247	0
	87	0.9872	94	135	0		87	1.6561	67	177	10		87	0.9892	78	248	0
	88	0.9808	91	136	0		88	1.7502	115	178	0		88	1.0103	136	249	0
	89	0.962	112	137	0		89	1.6015	106	179	0		89	1.0045	137	250	0
	90	1.0699	122	138	0		90	1.6651	93	180	0		90	1.0356	125	251	0
	91	1.1307	112	139	0		91	1.664	122	181	0		91	1.0571	135	252	0
	92	1.1593	141	140	0		92	1.5525	94	182	0		92	1.0247	132	253	0
	93	1.1864	112	141	0		93	1.8177	79	183	0		93	1.0145	98	254	0
	94	1.2354	7	142	0		94	1.9716	49	223	10		94	1.0443	135	255	0
	95	1.1485	0	143	0		95	2.1567	69	224	10		95	1.0374	137	256	0
	96	1.1538	3	144	0		96	1.7904	41	225	10		96	1.0303	110	256	10
	97	1.1117	9	145	0		97	1.5331	115	226	10		97	1.0621	102	257	10
	98	1.0386	7	146	0		98	1.3548	85	227	10		98	1.1205	124	258	10
	99	1.006	6	147	0		99	1.4907	62	228	10		99	1.0919	122	259	10
	100	1.0258	6	148	0		100	1.3575	27	229	10		100	1.0582	135	260	10
	101	1.0426	5	149	0		101	1.4145	67	230	0		101	1.0789	113	261	10
	102	0.9913	19	150	0		102	1.3712	82	231	0		102	1.0251	85	262	10
	103	1.1348	13	151	0		103	1.2186	54	232	0		103	1.0884	7	263	10
	104	1.1227	25	152	0		104	1.0723	15	233	0		104	0.9631	7	264	10
	105	1.0397	67	153	0		105	0.8816	8	234	0		105	1.0386	68	265	10
	106	1.0104	101	154	0		106	0.6424	0	235	0		106	1.0944	101	266	10
	107	1.0016	54	155	0		107	0.5821	1	236	0		107	1.1034	9	267	10
	108	1.0799	45	156	0		108	0.638	2	237	0		108	1.0453	1	268	10
	109	1.1661	28	157	0		109	0.6521	0	238	0		109	1.0373	9	269	10
	110	1.3989	21	158	0		110	0.5599	0	239	0		110	1.0253	45	270	10
	111	1.3677	14	159	0		111	0.5584	7	240	0		111	1.0249	36	271	10
	112	1.3207	5	160	0		112	0.4442	3	241	0		112	0.9766	55	272	10
	113	1.2877	11	161	10		113	0.3566	0	242	0		113	1.0163	21	273	0
	114	1.244	12	162	10		114	0.3269	0	243	0		114	1.0071	3	274	0
	115	1.2309	6	163	10		115	0.3079	0	244	0		115	0.9593	27	275	0
	116	1.1623	2	164	10		116	0.3148	2	245	0		116	0.9165	29	276	0
	117	1.152	8	165	10		117	0.3067	1	246	0		117	0.9919	14	277	0
	118	1.1648	13	166	10		118	0.2831	3	247	0		118	1.0058	115	278	0
	119	1.1673	8	167	10		119	0.2834	0	248	0		119	1.0088	134	279	0
	120	1.1006	48	168	10		120	0.3071	2	249	0		120	0.9839	155	280	0
	121	1.007	119	169	10		121	0.3411	6	250	0		121	1.002	142	281	0
	122	0.9783	105	170	10		122	0.2847	0	251	0		122	1.0235	159	282	0
	123	1.0047	124	171	10		123	0.2858	4	252	0		123	1.0268	151	283	0
	124	1.1856	121	172	10		124	0.2849	4	253	0		124	1.0681	145	284	0
	125	1.3195	73	173	10		125	0.3095	0	254	0		125	1.0784	143	285	0
	126	1.1917	91	174	10		126	0.3155	29	255	0		126	1.0531	132	286	0
	127	1.1766	135	175	10		127	0.4708	102	256	0		127	1.0389	142	287	0
	128	1.1477	119	176	10		128	0.7659	110	257	0		128	1.0378	141	288	10
	129	1.2931	38	177	10		129	0.7946	149	258	0		129	1.0803	139	289	10
	130	1.2622	96	178	10		130	0.8842	131	259	0		130	1.064	151	290	10
	131	1.2359	147	179	0		131	1.2974	117	260	0		131	1.038	144	291	10
	132	1.4361	55	180	0		132	1.323	104	261	10		132	1.0708	63	292	10
	133	1.3267	133	181	0		133	1.4883	90	262	10		133	1.0567	129	293	0
	134	1.1664	163	182	0		134	1.5125	74	263	10		134	1.0432	113	294	0
	135	1.314	30	183	0		135	1.6445	107	264	10		135	1.039	130	295	0
	136	1.3305	3	184	0		136	1.7449	63	265	10		136	1.0124	163	296	0
	137	1.2477	11	185	0		137	2.2088	66	266	10		137	1.0346	138	297	0
	138	1.2938	2	186	0		138	1.868	27	267	10		138	1.0734	145	298	0
	139	1.2055	0	187	0		139	2.2198	44	268	0		139	1.0789	129	299	0
	140	1.1728	0	188	0		140	1.8889	14	269	0		140	1.075	118	300	0
	141	1.1913	0	189	0		141	1.7791	24	270	0		141	1.0731	122	301	0
	142	1.1627	1	190	0		142	1.6362	11	271	0		142	1.0383	127	302	0
	143	1.121	0	191	0		143	1.4988	2	272	0		143	1.0398	119	303	0
	144	1.1068	1	192	0		144	1.2506	0	273	0		144	1.0319	132	304	0
	145	1.0718	22	193	0		145	1.2149	1	274	0		145	1.0219	127	305	0
	146	1.0727	25	194	0		146	1.185	0	275	0		146	1.0104	128	306	0
	147	1.0969	1	195	0		147	1.0945	13	276	0		147	1.0289	131	307	0
	148	1.0926	9	196	0		148	0.9757	0	277	0		148	1.0345	113	308	0
	149	1.084	0	197	0		149	0.8653	2	278	0		149	1.0165	69	309	0
	150	1.0208	1	198	0		150	0.8685	3	279	0		150	1.0594	98	310	0
	151	1.0089	0	199	0		151	0.8507	0	280	0		151	1.0513	117	311	0
	152	1.0262	22	200	0		152	0.7562	4	281	0		152	1.0184	126	312	0
	153	1.0738	18	221	10		153	0.7429	10	282	0		153	1.0622	114	313	0
	154	1.1	8	222	10		154	0.5738	0	283	0		154	0.9827	148	331	10
	155	1.0961	0	223	10		155	0.5384	1	284	0		155	0.9804	153	332	10
	156	1.0647	13	224	10		156	0.6021	0	285	0		156	0.9919	136	333	10
	157	1.0871	14	225	10		157	0.5681	0	286	0		157	1.0262	105	334	10
	158	1.1244	4	226	0		158	0.504	13	287	0		158	1.0109	49	335	10
	159	1.0948	0	227	0		159	0.5924	2	363	10		159	1.0497	53	336	0
	160	1.0843	9	228	0		160	0.5175	12	364	10		160	0.9963	7	337	0
	161	1.0275	54	229	0		161	0.4773	2	365	10		161	0.9921	8	338	0
	162	0.9275	107	230	0		162	0.5085	8	366	10		162	1.0049	3	339	0
	163	1.0906	146	231	0		163	0.627	0	367	10		163	0.9958	3	340	0
	164	1.1859	125	232	0		164	0.5138	2	368	10		164	0.9527	0	341	0
	165	1.3742	80	233	0		165	0.4836	1	369	10		165	1.0107	17	342	0
	166	1.3128	125	234	0		166	0.4921	2	370	10		166	0.9571	0	343	0
	167	1.4568	69	235	0		167	0.5229	4	371	10		167	0.976	15	344	0
	168	1.2457	101	236	0		168	0.6145	0	372	10		168	1.0188	11	345	0
	169	1.1908	142	237	0		169	0.5672	9	373	10		169	0.9946	25	346	0
	170	1.3114	139	238	0		170	0.5358	44	374	10		170	0.8948	1	347	0
	171	1.4647	126	239	0		171	0.8471	48	375	0		171	0.8947	0	348	0
	172	1.3299	60	240	0		172	1.0314	62	376	0		172	0.8918	4	349	0
	173	1.3663	75	241	0		173	1.0908	75	377	0		173	0.912	6	350	0
	174	1.2841	126	242	0		174	1.1914	60	378	0		174	0.9504	7	351	0
	175	1.462	108	243	0		175	1.2341	76	379	0		175	0.9246	2	352	0
	176	1.4352	62	244	0		176	1.1866	79	380	0		176	0.9537	11	353	0
	177	1.3282	123	245	0		177	1.38	67	381	0		177	0.9456	2	354	0
	178	1.4693	91	246	0		178	1.2699	51	382	0		178	0.9185	0	355	0
	179	1.4016	49	247	0		179	1.2339	36	383	0		179	0.9263	1	356	0
	180	1.3351	30	248	0		180	1.2647	28	384	0		180	0.9231	4	357	0
	181	1.3163	10	249	0		181	1.6203	6	385	0		181	0.9383	28	358	0
	182	1.2726	7	250	0		182	1.8579	6	386	10		182	0.9794	110	359	0
	183	1.19	13	251	0		183	1.7679	21	387	10		183	0.9575	98	360	0
	184	1.1498	16	252	10		184	1.7553	48	388	10		184	0.9916	90	361	0
	185	1.0989	11	253	10		185	1.5699	8	389	10		185	0.9787	128	362	10
	186	1.1344	8	254	10		186	1.4782	30	390	10		186	0.9535	107	363	10
	187	1.1018	10	255	10		187	1.2445	3	391	10		187	0.9872	147	364	10
	188	1.1327	8	256	10		188	1.1335	18	392	10		188	1.0219	135	365	10
	189	1.1053	8	257	10		189	1.0611	0	393	0		189	1.0511	136	366	10
	190	1.0813	10	258	10		190	0.8661	5	394	0		190	1.0344	159	367	10
	191	1.0358	5	259	10		191	0.7453	0	395	0		191	1.0471	128	368	0
	192	1.0376	8	260	10		192	0.6738	0	396	0		192	0.9954	142	369	0
	193	0.9614	11	261	10		193	0.6931	2	397	0		193	1.0003	142	370	0
	194	0.9832	1	262	0		194	0.8091	0	398	0		194	0.9688	124	371	0
	195	1.0313	0	263	0		195	0.8151	0	399	0		195	1.0173	145	372	0
	196	1.0078	28	264	0		196	0.8588	0	400	0		196	0.9707	134	373	0
	197	1.1125	33	265	0		197	0.9641	2	401	0		197	1.0181	132	374	0
	198	1.1232	0	266	0		198	0.6267	3	402	0		198	0.9923	141	375	0
	199	1.1433	3	267	0		199	0.5965	0	417	10		199	1.0169	139	376	0
	200	1.1273	4	268	0		200	0.7412	2	418	10		200	0.9995	124	377	0
	201	0.9783	73	269	0		201	0.7443	0	419	0		201	0.992	141	378	0
	202	0.9744	60	270	0		202	0.664	0	420	0		202	0.9823	107	379	0
	203	1.2292	90	271	0		203	0.7388	0	421	0		203	1.006	118	380	0
	204	1.113	104	272	0		204	0.6927	0	422	0		204	0.9659	73	381	0
	205	1.0999	24	273	0		205	0.6114	0	423	0		205	0.93	98	382	0
	206	1.2996	45	312	10		206	0.5905	0	424	0		206	0.8807	75	383	0
	207	1.4665	22	313	10		207	0.5819	0	456	10		207	0.97	94	384	0
	208	1.4227	5	314	10		208	0.616	4	457	10		208	1.0019	129	385	0
	209	1.3631	0	315	10		209	0.6069	1	458	10		209	0.9501	101	386	0
	210	1.2823	30	316	10		210	0.5906	0	459	10		210	1.0258	95	387	0
	211	1.1924	34	317	10		211	0.5836	0	460	10		211	0.976	129	388	0
	212	1.131	16	318	10		212	0.5732	0	461	10		212	0.9958	130	389	0
	213	1.1079	10	319	10		213	0.5779	1	462	0		213	0.9858	116	390	0
	214	1.0004	90	320	0		214	0.5769	6	463	0		214	0.9613	110	391	0
	215	0.8838	104	321	0		215	0.7684	0	464	0		215	0.9017	42	392	0
	216	1.0969	115	322	0		216	0.8946	5	465	0		216	0.8489	1	433	10
	217	1.1203	96	323	0		217	0.7174	35	466	0		217	0.8502	0	434	10
	218	1.2202	84	324	0		218	1.1768	16	467	0		218	0.8794	0	435	10
	219	1.1655	68	325	0		219	1.8801	67	468	0		219	0.9643	115	436	10
	220	1.2124	16	326	0		220	2.021	109	469	0		220	0.965	143	437	10
	221	1.2686	107	327	0		221	1.9494	59	541	10		221	0.9556	125	438	10
	222	1.528	79	328	0		222	1.8778	35	542	10		222	0.9813	83	439	10
	223	1.3546	126	329	0		223	1.7739	67	543	0		223	0.9364	12	440	10
	224	1.344	120	330	0		224	1.7614	57	544	0		224	0.9164	2	441	10
	225	1.3355	122	331	0		225	2.1594	47	545	0		225	0.909	20	442	10
	226	1.2403	82	332	0		226	2.172	115	546	0		226	0.9591	114	443	10
	227	1.2806	13	333	0		227	1.7075	49	547	0		227	0.9556	137	444	10
	228	1.1491	2	334	0		228	1.9142	45	548	0		228	0.9572	135	445	10
	229	1.1344	1	356	10		229	1.8087	74	549	0		229	0.9578	149	446	0
	230	1.2283	28	357	10		230	1.9237	61	550	0		230	0.9656	146	447	0
	231	1.3134	0	358	10		231	2.0076	13	551	0		231	0.9646	141	448	0
	232	1.1981	38	359	10		232	1.6293	4	552	0		232	0.9806	142	449	0
	233	1.0864	24	360	10		233	1.4458	7	553	0		233	0.9773	122	450	0
	234	1.068	2	361	10		234	1.2802	0	554	0		234	0.9699	129	451	0
	235	1.0398	29	362	10		235	0.9502	13	555	0		235	0.9556	131	452	0
	236	1.0622	10	363	10		236	0.8506	3	556	0		236	0.9751	141	453	0
	237	1.0246	26	364	0		237	0.7731	3	557	0		237	0.9908	137	454	0
	238	0.989	35	365	0		238	0.7068	3	558	0		238	0.9839	130	455	0
	239	0.9614	14	366	0		239	0.8443	13	559	0		239	0.9764	109	456	0
	240	0.9534	26	367	0		240	0.8718	1	560	0		240	0.9343	131	457	0
	241	0.9726	4	368	0		241	0.8012	0	561	0		241	0.9928	91	458	0
	242	0.96	6	369	0		242	0.7403	16	562	0		242	0.9604	76	459	0
	243	0.933	7	370	0		243	0.8316	15	563	0		243	0.9063	0	460	0
	244	1.007	21	371	0		244	0.948	1	564	0		244	0.8949	0	461	0
	245	1.0335	1	372	0		245	0.948	0	565	0		245	0.9898	20	462	0
	246	1.004	0	373	0		246	0.7142	7	566	0		246	0.9353	3	463	0
	247	0.9709	4	374	0		247	0.675	8	567	0		247	0.9166	9	464	0
	248	1.0156	1	375	0		248	0.7008	1	568	0		248	0.8803	1	465	0
	249	0.9874	0	376	0		249	0.7347	0	670	10		249	1.0047	13	466	0
	250	0.9507	24	377	0		250	0.6962	1	671	10		250	1.0262	0	467	0
	251	0.9343	4	378	0		251	0.7326	7	672	0		251	0.9628	2	468	0
	252	0.869	94	379	0		252	0.7301	4	673	0		252	0.9577	1	469	0
	253	0.8516	98	380	0		253	0.619	6	674	0		253	0.9564	0	470	0
	254	0.9818	129	381	0		254	0.5899	1	675	0		254	0.9502	0	471	0
	255	1.0467	114	382	0		255	0.5812	0	676	0		255	0.8804	0	472	0
	256	1.4131	67	383	0		256	0.5749	0	677	0		256	0.9144	45	473	0
	257	1.3723	61	384	0		257	0.5629	7	678	0		257	0.9901	113	474	0
	258	1.1855	63	385	0		258	0.5814	2	679	0		258	1.0024	89	641	10
	259	1.3209	56	386	0		259	0.706	15	680	0		259	1.0207	89	642	10
	260	1.2562	92	387	0		260	0.8219	2	681	0		260	0.9973	144	643	10
	261	1.2802	133	388	0		261	0.7701	55	682	0		261	1.0293	151	644	10
	262	1.2057	139	404	10		262	1.1109	88	683	0		262	0.9785	149	645	10
	263	1.2977	5	405	10		263	1.4137	84	684	0		263	0.995	164	646	10
	264	1.232	12	406	0		264	1.8049	55	685	0		264	1.0231	151	647	10
	265	1.2261	22	407	0		265	1.6903	85	686	10		265	1.0184	141	648	10
	266	1.1995	0	408	0		266	1.8437	84	687	10		266	0.9993	123	649	10
	267	1.1316	30	409	0		267	2.0448	70	688	10		267	0.9824	128	650	10
	268	1.0877	18	410	0		268	1.9263	112	689	10		268	0.9399	81	651	10
	269	1.0476	11	411	0		269	1.7465	6	690	10		269	0.8933	88	652	10
	270	1.0294	0	412	0		270	1.5695	7	691	10		270	1.0546	105	653	10
	271	1.0047	0	413	0		271	1.4798	8	692	10		271	1.044	110	654	10
	272	0.9922	33	414	0		272	1.3368	3	693	10		272	0.9981	106	655	10
	273	0.9337	13	415	0		273	1.1994	12	694	0		273	0.9855	63	656	10
	274	0.9102	40	416	0		274	1.0592	1	695	0		274	0.9728	12	657	10
	275	0.8986	111	417	0		275	1.0357	10	696	0		275	0.9356	7	658	10
	276	1.0218	4	418	0		276	1.1321	28	697	0		276	0.9298	1	659	10
	277	1.0355	8	424	10		277	1.1313	5	698	0		277	0.9019	2	660	10
	278	1.0228	25	425	10		278	1.1158	32	699	0		278	0.9468	22	661	10
	279	1.0295	0	426	10		279	1.0357	9	700	0		279	0.8824	0	662	10
	280	0.933	27	427	0		280	0.9233	0	701	0		280	0.9003	2	663	10
	281	0.896	11	428	0		281	0.9901	8	702	0		281	0.9301	4	664	10
	282	0.896	6	429	0		282	1.1567	0	703	0		282	0.9077	2	665	10
	283	0.8887	14	430	0		283	1.1796	0	704	0		283	0.8991	0	666	0
	284	0.8703	4	431	0		284	1.0587	3	705	0		284	0.8847	2	667	0
	285	0.8964	21	432	0		285	0.8032	0	706	0		285	0.9486	4	668	0
	286	0.9389	2	433	0		286	0.7278	5	707	0		286	0.9265	0	669	0
	287	0.8772	17	434	0		287	0.7934	16	708	0		287	0.8996	33	670	0
	288	0.8215	40	435	0		288	0.8729	80	709	0		288	1.003	94	671	0
	289	0.8357	52	436	0		289	1.3826	53	710	0		289	0.993	84	672	0
	290	0.8413	116	437	0		290	1.3638	71	711	0		290	0.9424	89	673	0
	291	0.9214	97	438	0		291	1.2742	61	712	0		291	0.992	145	674	0
	292	1.0254	95	439	0		292	1.3469	12	713	0		292	0.971	97	675	0
	293	1.1283	36	440	0		293	1.311	21	714	0		293	1.0018	154	676	0
	294	1.0875	101	441	10		294	1.3874	83	715	0		294	0.901	18	718	10
	295	0.9976	129	442	10		295	1.273	97	716	0		295	0.9599	9	719	10
	296	1.0075	171	443	10		296	1.2615	6	717	0		296	0.9972	0	720	10
	297	1.0828	36	444	10		297	1.0908	3	718	0		297	0.9326	0	721	10
	298	0.9829	83	445	10		298	1.0874	0	719	0		298	0.9298	0	722	10
	299	1.0416	6	446	0		299	0.9946	11	720	0		299	0.9367	0	723	10
	300	0.9915	0	447	0		300	1.0076	4	721	0		300	0.9723	9	724	10
	301	0.9289	68	448	0		301	0.9908	9	722	0		301	0.9886	0	725	0
	302	1.0105	9	449	0		302	1.1126	2	723	0		302	0.953	2	726	0
	303	0.9774	0	450	0		303	1.1404	12	724	0		303	0.9573	0	727	0
	304	0.9426	0	451	0		304	0.9549	61	725	0		304	0.922	0	728	0
	305	0.9203	0	452	0		305	1.0771	71	729	10		305	0.9111	1	729	0
	306	0.8967	20	453	0		306	1.5937	32	730	10		306	0.8996	9	730	0
	307	0.9066	3	459	10		307	1.5002	66	731	10		307	0.8469	0	731	0
	308	0.8756	0	460	10		308	1.3256	9	732	10		308	0.8754	0	732	0
	309	0.8637	0	461	10		309	1.0576	11	733	10		309	0.8767	0	751	10
	310	0.8397	0	462	10		310	0.9538	15	734	10		310	0.8848	3	752	10
	311	0.8556	17	463	0		311	0.9562	5	735	10		311	0.8616	0	753	10
	312	0.8557	54	464	0		312	0.8984	10	736	10		312	0.8522	0	754	10
	313	0.8095	102	465	0		313	0.8764	17	737	0		313	0.8686	3	755	10
	314	0.8674	99	466	0		314	0.9088	16	738	0		314	1.0055	112	756	10
	315	0.982	53	467	0		315	0.6873	3	739	0		315	0.9735	131	757	10
	316	1.022	113	468	0		316	0.6924	3	740	0		316	0.9718	128	758	10
	317	1.0457	131	469	0		317	0.7566	0	741	0		317	0.9504	72	759	10
	318	1.1025	146	470	0		318	0.6991	7	742	0		318	0.9417	61	760	10
	319	0.9939	83	471	0		319	0.7104	3	743	0		319	0.9724	70	761	10
	320	1.0022	107	472	0		320	0.8125	5	744	0		320	0.9427	38	762	10
	321	1.0301	20	473	0		321	0.7509	1	745	0		321	0.9303	58	763	10
	322	0.9436	2	474	0		322	0.7991	11	746	0		322	0.9166	41	764	10
	323	0.9549	30	475	10		323	0.7515	6	747	0		323	0.9553	60	765	0
	324	0.9547	18	476	10		324	0.7721	3	748	0		324	1.0253	15	766	0
	325	0.9275	10	477	10		325	0.6861	4	749	0		325	1.0465	0	767	0
	326	0.8999	3	478	10		326	0.7171	2	750	0		326	1.0074	0	768	0
	327	0.8616	5	479	0		327	0.8041	7	751	0		327	0.9942	0	769	0
	328	0.8447	21	480	0		328	0.9824	2	752	0		328	1.0063	0	770	0
	329	0.8829	0	481	0		329	1.1669	10	753	0		329	0.9219	0	771	0
	330	0.8766	0	482	0		330	1.2264	49	754	0		330	0.9153	14	772	0
	331	0.8527	0	483	0		331	1.2656	103	755	0		331	1.0047	79	794	10
	332	0.8408	3	484	0		332	1.1301	32	756	0		332	1.0072	123	795	10
	333	0.8286	6	485	0		333	1.1863	74	757	0		333	1.0187	101	796	10
	334	0.7957	1	486	10		334	1.0844	151	758	0		334	1.0064	67	797	10
	335	0.7491	51	487	10		335	0.9636	83	759	0		335	0.951	65	798	10
	336	0.7479	8	488	0		336	1.2919	56	760	0		336	0.9697	68	799	0
	337	0.7602	1	489	0		337	1.8019	30	761	0		337	0.9582	0	800	0
	338	0.7634	0	490	0		338	1.8886	42	762	0		338	0.9748	0	801	0
	339	0.741	0	491	0		339	1.8143	13	763	10		339	1.0256	0	802	0
	340	0.7625	0	492	0		340	1.7748	22	764	10		340	1.0296	3	803	0
	341	0.7718	0	493	0		341	1.5267	4	765	10		341	1.0118	8	804	0
	342	0.7611	17	494	0		342	1.4075	5	766	10		342	0.9692	0	805	0
	343	0.8146	4	517	10		343	1.3475	13	767	10		343	0.9304	1	806	0
	344	0.8516	0	518	10		344	1.2061	60	768	10		344	0.9371	3	807	0
	345	0.851	0	519	10		345	1.3026	17	769	10		345	0.9891	1	808	0
	346	0.8295	0	520	10		346	1.0999	9	770	10		346	0.948	0	809	0
	347	0.8524	8	521	10		347	1.0384	7	771	10		347	0.9121	0	810	0
	348	0.8402	0	522	10		348	0.9475	4	772	10		348	0.8892	0	811	0
	349	0.8268	4	523	10		349	0.8832	1	773	0		349	0.9093	2	812	0
	350	0.7979	28	524	0		350	0.8767	3	774	0		350	0.9527	0	813	0
	351	0.7958	2	525	0		351	0.7893	7	775	0		351	0.9439	0	814	0
	352	0.7977	0	526	0		352	0.7677	0	776	0		352	0.9891	4	815	0
	353	0.7818	1	527	0		353	0.7528	0	777	0		353	0.9852	8	816	0
	354	0.7615	0	528	0		354	0.7153	0	778	0		354	0.9384	0	817	0
	355	0.7632	16	529	0		355	0.6867	4	779	0		355	0.9235	0	818	0
	356	0.7538	97	674	10		356	0.7164	0	780	0		356	0.9384	2	819	0
	357	0.7525	97	675	10		357	0.8814	4	781	0		357	0.9518	4	820	10
	358	0.7766	145	676	10		358	0.9548	2	782	0		358	0.9527	2	821	10
	359	0.8396	104	677	10		359	0.8496	13	783	0		359	0.9989	5	822	10
	360	0.8986	53	678	10		360	1.0046	9	784	0		360	0.9664	0	823	10
	361	0.8984	69	679	10		361	0.9972	5	785	0		361	0.9894	2	824	10
	362	0.8789	63	680	10		362	0.989	15	786	0		362	0.9989	86	825	10
	363	0.8951	93	681	10		363	0.9669	100	787	0		363	1.0122	115	826	10
	364	0.856	142	682	10		364	1.2233	54	788	0		364	0.9942	64	827	0
	365	0.8619	29	683	10		365	1.1093	69	789	0		365	0.9793	87	828	0
	366	0.8774	0	684	10		366	1.1662	86	790	0		366	1.0141	117	829	0
	367	0.8314	0	685	0		367	1.7732	61	791	0		367	1.0243	147	830	0
	368	0.8151	0	686	0		368	1.9837	77	792	0		368	1.0271	63	831	0
	369	0.7807	1	687	0		369	1.7049	53	793	0		369	0.981	26	832	0
	370	0.7769	1	688	0		370	1.5562	85	794	0		370	0.9873	33	833	0
	371	0.7644	8	689	0		371	1.7166	149	795	0		371	0.949	2	834	0
	372	0.7539	0	690	0		372	1.5274	85	796	0		372	1.0315	0	835	0
	373	0.7567	0	691	0		373	1.4884	71	797	0		373	1.0148	0	836	0
	374	0.7141	18	692	0		374	1.7743	99	798	0		374	0.9975	0	837	0
	375	0.7231	17	693	0		375	1.7924	52	799	0		375	0.9668	0	838	0
	376	0.7313	5	694	0		376	1.6734	4	800	0		376	0.95	0	839	0
	377	0.7262	0	695	0		377	1.4417	8	804	10		377	0.9565	2	840	0
	378	0.7155	6	696	0		378	1.0294	0	805	10		378	1.0113	4	841	0
	379	0.6985	0	697	0		379	1.0087	4	806	10		379	0.9944	0	842	0
	380	0.7153	15	698	0		380	0.9651	7	807	10		380	0.9553	0	843	0
	381	0.7409	5	699	0		381	0.9405	38	808	10		381	0.9689	1	844	10
	382	0.7433	3	700	0		382	0.9672	11	809	10		382	0.9958	0	845	10
	383	0.7144	19	701	0		383	0.9546	3	810	10		383	0.9696	0	846	10
	384	0.7222	0	702	0		384	0.8265	4	811	10		384	0.9081	0	847	10
	385	0.7396	3	703	0		385	0.7317	9	812	10		385	0.9147	0	848	10
	386	0.7234	0	704	0		386	0.6206	59	813	10		386	0.9296	3	849	0
	387	0.7077	6	705	0		387	0.7743	50	814	10		387	0.9261	0	850	0
	388	0.7294	0	706	0		388	1.0152	65	815	10		388	0.992	6	851	0
	389	0.6964	44	707	0		389	0.7614	40	816	0		389	0.9742	3	852	0
	390	0.7199	1	708	0		390	0.7328	104	817	0		390	0.9591	2	853	0
	391	0.7357	1	709	0		391	0.6542	74	818	0		391	0.9944	13	854	0
	392	0.7195	2	710	0		392	0.9313	86	819	0		392	0.9596	45	855	0
	393	0.7225	0	711	10		393	1.1176	69	820	0		393	1.0286	73	856	0
	394	0.6932	1	712	10		394	0.9805	7	821	0		394	1.0443	95	857	0
	395	0.7144	0	713	10		395	0.8167	22	822	0		395	1.0574	100	858	0
	396	0.7195	14	714	10		396	0.9135	9	823	0		396	1.0043	18	859	0
	397	0.7509	4	715	10		397	0.8825	4	824	0		397	0.9983	71	860	0
	398	0.7764	0	716	10		398	0.9715	1	825	0		398	0.9593	19	861	0
	399	0.755	0	717	0		399	0.9702	1	826	0		399	0.9304	0	862	0
	400	0.7549	1	718	0		400	0.8502	3	827	0		400	0.9124	6	863	0
	401	0.7537	8	719	0		401	0.8522	14	828	0		401	0.9074	14	864	0
	402	0.7477	0	720	0		402	0.7134	32	829	0		402	0.9211	15	865	0
	403	0.7326	9	721	0		403	0.6631	87	830	0		403	0.894	0	866	0
	404	0.7359	81	722	0		404	0.7363	95	831	0		404	0.9476	2	867	0
	405	0.7337	90	723	0		405	0.8702	114	832	0		405	0.9581	0	868	0
	406	0.7597	55	724	0		406	0.9177	65	833	0		406	0.9591	0	869	0
	407	0.8434	0	725	0		407	0.9319	99	834	0		407	0.9251	3	870	0
	408	0.8392	0	726	0		408	0.8766	83	835	0		408	0.9277	11	871	0
	409	0.805	0	727	0		409	0.9493	129	836	0		409	0.8882	0	872	0
	410	0.7848	0	728	0		410	0.9877	134	837	10		410	0.9145	0	873	0
	411	0.7735	8	729	0		411	1.0952	84	838	10		411	0.903	0	874	0
	412	0.7517	2	730	0		412	1.2982	61	839	10		412	0.8936	0	875	0
	413	0.7337	31	731	0		413	1.7515	92	840	10		413	0.9126	0	876	0
	414	0.7609	3	732	0		414	1.4023	56	841	10		414	0.9068	0	877	0
	415	0.7664	0	733	0		415	1.3834	18	842	10		415	0.9193	0	878	0
	416	0.7549	2	734	0		416	1.2447	4	843	10		416	0.9203	2	879	0
	417	0.7595	2	735	0		417	1.2141	39	844	10		417	0.9235	2	880	0
	418	0.7198	26	736	0		418	0.9331	53	845	10		418	0.9178	1	881	0
	419	0.6903	62	737	0		419	0.9943	64	846	10		419	0.9149	4	882	0
	420	0.8082	24	738	0		420	1.098	10	847	10		420	0.9238	0	883	0
	421	0.7615	50	739	10		421	0.9983	18	848	10		421	0.9414	3	884	0
	422	0.793	79	740	10		422	0.9112	8	849	10		422	0.9335	6	887	10
	423	0.8786	34	741	10		423	0.7408	15	850	10		423	0.8952	0	888	10
	424	0.7796	102	742	10		424	0.7176	12	851	10		424	0.9372	10	889	10
	425	0.8402	93	743	0		425	0.7895	73	852	0		425	0.8958	3	890	10
	426	0.782	122	744	0		426	0.9173	62	853	0		426	0.9072	0	891	10
	427	0.8212	116	745	0		427	1.0279	67	854	0		427	0.9761	39	892	10
	428	0.8523	31	746	0		428	0.8524	65	855	0		428	0.9808	90	893	10
	429	0.8589	2	747	0		429	0.8285	144	856	0		429	1.0478	105	894	10
	430	0.8014	0	748	0		430	0.7846	141	857	0		430	1.063	77	895	10
	431	0.8038	4	749	0		431	0.8431	87	858	0		431	1.0641	40	896	10
	432	0.7682	0	750	0		432	0.945	63	859	0		432	1.0621	0	897	10
	433	0.7524	15	751	0		433	1.0665	115	860	0		433	1.0469	88	898	10
	434	0.7197	0	752	0		434	1.1014	107	861	0		434	1.0042	136	899	10
	435	0.7157	18	753	0		435	1.0595	110	862	0		435	1.0355	125	900	10
	436	0.7175	2	754	0		436	1.2019	131	863	0		436	1.0483	87	901	10
	437	0.6923	3	755	0		437	1.2182	90	864	0		437	1.0675	141	902	10
	438	0.6816	2	756	0		438	1.3249	131	865	0		438	1.0757	116	903	10
	439	0.6737	3	757	0		439	1.3102	142	866	0		439	1.0251	91	904	10
	440	0.6858	14	758	0		440	1.1938	102	867	0		440	0.9868	55	905	10
	441	0.701	69	759	0		441	1.2211	110	868	10		441	1.1248	88	906	10
	442	0.7081	74	760	0		442	1.6927	115	869	10		442	1.1218	86	907	10
	443	0.7733	68	761	0		443	1.925	54	870	10		443	1.0686	105	908	10
	444	0.7358	118	762	0		444	1.5306	6	871	10		444	1.0548	65	909	10
	445	0.7665	103	763	0		445	1.1688	2	872	10		445	1.1242	51	910	10
	446	0.7785	127	822	10		446	1.1117	15	873	10		446	1.1206	56	911	0
	447	0.8241	2	823	10		447	1.0257	53	874	10		447	1.1139	14	912	0
	448	0.8251	0	824	10		448	0.9324	49	875	10		448	1.1028	0	913	0
	449	0.7921	0	825	10		449	0.9221	132	876	10		449	1.1061	1	914	0
	450	0.8018	1	826	10		450	0.9005	129	877	10		450	0.941	0	915	0
	451	0.7735	3	827	0		451	0.8784	111	878	0		451	1.0182	0	916	0
	452	0.7382	6	828	0		452	0.8868	122	879	0		452	1.0342	0	917	0
	453	0.7081	16	829	0		453	0.8659	120	880	0		453	1.0673	0	918	0
	454	0.6927	76	830	0		454	0.9103	90	881	0		454	0.9942	2	919	0
	455	0.7137	35	831	0		455	1.0686	36	882	0		455	0.9557	0	920	0
	456	0.7313	0	832	0		456	1.1271	96	883	0		456	1.0606	26	921	0
	457	0.7269	6	833	0		457	1.1005	122	884	0		457	1.0691	35	922	0
	458	0.7117	10	834	0		458	1.0848	67	888	10		458	1.0295	2	923	0
	459	0.7157	48	835	0		459	1.0011	137	889	10		459	1.0225	0	924	0
	460	0.7081	81	836	0		460	1.0739	98	890	10		460	1.0342	16	925	0
	461	0.6889	57	837	0		461	1.0538	74	891	10		461	0.9941	0	926	0
	462	0.6959	49	838	0		462	1.489	81	892	10		462	0.9648	0	927	0
	463	0.9064	56	839	0		463	1.6246	8	893	10		463	0.9644	0	928	0
	464	0.9419	4	840	0		464	1.3521	8	894	0		464	0.9534	0	929	0
	465	0.9159	0	841	0		465	1.1213	26	895	0		465	0.9503	2	930	0
	466	0.9015	6	842	0		466	1.0589	8	896	0		466	0.9847	0	931	0
	467	0.8781	24	843	0		467	1.005	8	897	0		467	0.9547	0	932	0
	468	0.8527	19	844	0		468	0.9534	2	898	0		468	0.9396	0	933	0
	469	0.8503	0	845	0		469	0.8119	27	899	0		469	0.9031	0	934	0
	470	0.7945	25	846	0		470	0.6268	62	900	0		470	0.9017	0	935	0
	471	0.7852	4	847	0		471	0.9419	93	901	0		471	0.9262	6	936	0
	472	0.7847	5	848	0		472	0.9734	137	902	0		472	0.9685	0	1097	10
	473	0.7684	31	849	0		473	0.8592	119	903	0		473	0.9624	25	1098	10
	474	0.7579	8	850	0		474	0.86	134	904	0		474	0.9348	14	1099	10
	475	0.7034	116	851	0		475	0.7891	137	919	10		475	0.9901	74	1100	10
	476	0.7801	92	852	0		476	0.8188	98	920	10		476	1.0236	76	1101	10
	477	0.7899	73	853	0		477	0.8808	146	921	10		477	0.9902	0	1102	10
	478	0.8113	98	854	0		478	0.834	112	922	10		478	0.9175	21	1103	10
	479	0.8121	105	855	0		479	0.9641	78	923	10		479	0.9536	59	1104	10
	480	0.8894	26	856	0		480	0.7851	80	924	10		480	1.0166	109	1105	10
	481	0.918	4	857	0		481	1.2289	75	925	10		481	0.9746	104	1106	10
	482	0.8689	26	858	0		482	1.2258	11	926	10		482	0.9539	69	1107	10
	483	0.8699	23	859	0		483	1.1092	5	927	10		483	1.0186	82	1108	10
	484	0.8447	8	860	0		484	1.1139	11	928	10		484	1.0306	148	1109	10
	485	0.8471	1	861	0		485	0.9503	18	929	10		485	0.989	83	1110	10
	486	0.8119	65	862	0		486	0.8261	114	930	10		486	0.9757	11	1111	10
	487	0.8017	134	863	0		487	0.9139	102	931	10		487	1.0403	91	1112	10
	488	0.8217	109	864	0		488	0.9224	123	932	10		488	1.0377	116	1113	10
	489	0.852	22	865	0		489	0.7303	61	933	10		489	1.0403	113	1114	10
	490	0.9586	31	866	0		490	0.8235	124	934	10		490	1.0232	118	1115	10
	491	0.9554	0	867	0		491	0.7692	159	935	10		491	1.0355	138	1116	10
	492	0.9803	21	868	0		492	0.7974	140	936	10		492	1.0947	142	1117	10
	493	0.9583	0	869	0		493	0.7413	114	937	10		493	1.1275	105	1118	0
	494	0.8883	1	870	0		494	0.8494	138	938	10		494	1.183	121	1119	0
	495	0.853	80	871	0		495	0.9486	123	939	0		495	1.1683	153	1120	0
	496	0.8244	110	872	0		496	1.0167	128	940	0		496	1.1392	136	1121	0
	497	0.8599	37	873	0		497	0.9398	92	941	0		497	1.1406	153	1122	0
	498	0.9815	86	874	0		498	1.1339	130	942	0		498	1.1133	136	1123	0
	499	0.9717	61	875	0		499	1.0406	88	943	0		499	1.0882	135	1124	0
	500	1.0726	10	876	0		500	1.0056	118	944	0		500	1.1097	110	1125	0
	501	1.0278	16	877	0		501	1.0716	74	945	0		501	1.0912	96	1126	0
	502	0.9337	16	878	0		502	1.1385	96	946	0		502	1.062	94	1127	0
	503	0.8926	17	879	0		503	1.0052	35	947	10		503	1.0735	146	1128	0
	504	0.8403	39	880	0		504	0.959	30	948	10		504	1.0329	147	1129	0
	505	0.8068	5	881	0		505	0.9395	55	949	10		505	1.0548	96	1130	0
	506	0.7571	2	882	0		506	1.0248	81	950	10		506	1.036	35	1131	0
	507	0.8701	73	883	0		507	1.1033	19	951	10		507	1.0095	119	1132	0
	508	0.9359	103	884	0		508	1.0852	16	952	10		508	1.0089	84	1133	0
	509	1.1022	17	885	0		509	0.7947	6	953	10		509	1.0736	125	1134	0
	510	1.0829	17	886	0		510	0.6849	9	954	10		510	1.0307	137	1135	0
	511	1.0089	11	887	10		511	0.6764	5	955	10		511	1.0163	152	1136	0
	512	0.9696	0	888	10		512	0.7877	5	956	10		512	1.0286	138	1137	0
	513	0.9476	0	889	10		513	0.8233	0	957	10		513	1.0067	121	1138	0
	514	0.9448	1	890	10		514	0.9212	0	958	10		514	1.0261	153	1139	0
	515	0.9286	8	891	10		515	0.7413	14	959	10		515	1.004	120	1140	0
	516	0.8991	11	892	10		516	0.7005	1	960	10		516	1.0152	117	1141	10
	517	0.8253	55	893	10		517	0.6963	5	961	0		517	1.0004	51	1142	10
	518	0.8711	73	894	10		518	0.642	2	962	0		518	1.0292	106	1143	10
	519	0.9656	85	895	0		519	0.622	0	963	0		519	0.9916	120	1144	10
	520	0.9551	79	896	0		520	0.6249	3	964	0		520	1.0184	88	1145	10
	521	0.9904	126	897	0		521	0.6093	3	965	0		521	1.0058	100	1146	10
	522	0.985	128	898	0		522	0.5617	4	966	0		522	1.057	97	1147	10
	523	1.0645	96	899	0		523	0.5136	11	967	0		523	1.0055	135	1148	10
	524	1.1258	45	900	0		524	0.5377	108	982	10		524	1.0316	89	1149	10
	525	1.1705	0	901	0		525	0.8364	108	983	10		525	1.0288	138	1150	10
	526	1.1155	0	902	0		526	0.96	56	984	10		526	1.0099	121	1151	10
	527	1.0913	2	903	0		527	1.1889	85	985	10		527	0.9937	86	1152	10
	528	1.0419	0	904	0		528	1.145	156	986	10		528	1.0116	123	1153	10
	529	0.9844	0	905	0		529	1.1118	134	987	10		529	1.027	120	1154	10
	530	0.8891	59	906	0		530	1.0965	64	988	0		530	1.038	133	1155	10
	531	0.8718	57	907	0		531	1.2499	89	989	0		531	1.0275	135	1156	10
	532	0.9588	99	908	0		532	1.2114	114	990	0		532	1.0065	102	1157	10
	533	0.9365	78	909	0		533	1.0887	111	991	0		533	1.0422	116	1158	10
	534	1.0327	111	912	10		534	1.2271	100	992	0		534	1.0664	79	1159	10
	535	1.1118	56	913	10		535	1.143	134	993	0		535	1.0397	11	1160	10
	536	1.1551	35	914	10		536	1.0196	95	994	0		536	1.03	50	1161	10
	537	1.1415	5	915	0		537	1.2259	67	995	0		537	1.0252	127	1162	10
	538	1.1109	2	916	0		538	1.3393	116	996	0		538	0.9933	120	1163	10
	539	0.9923	47	917	0		539	1.4114	83	997	0		539	1.0102	135	1164	10
	540	0.9149	111	918	0		540	1.3601	21	998	0		540	1.0095	156	1165	0
	541	1.0343	91	919	0		541	1.3079	75	1014	10		541	1.0233	148	1166	0
	542	1.0611	11	920	0		542	1.1916	85	1015	10		542	0.9776	144	1167	0
	543	0.9331	133	921	0		543	1.3124	71	1016	10		543	1.0182	160	1168	0
	544	1.0252	98	922	0		544	1.4322	8	1017	0		544	0.9717	140	1169	0
	545	1.1966	36	923	0		545	1.2803	7	1018	0		545	1.0113	122	1170	0
	546	1.0028	78	924	0		546	1.1416	0	1019	0		546	0.9983	152	1171	0
	547	1.0999	52	925	10		547	1.066	5	1020	0		547	1.0115	146
	548	1.0832	54	926	10		548	0.944	11	1021	0		548	0.9883	115	113	0
	549	1.1231	108	927	10		549	0.7235	6	1022	0		549	1.007	112	114	0
	550	1.0317	108	928	0		550	0.8002	0	1023	0		550	1.0174	122	115	0
	551	0.988	132	929	0		551	0.7702	0	1024	0		551	1.0478	146	116	0
	552	1.1677	117	930	0		552	0.589	4	1025	0		552	1.0344	154	117	10
	553	1.1352	111	931	0		553	0.5889	1	1026	0		553	1.0527	133	118	10
	554	1.1152	104	932	0		554	0.5442	0	1027	0		554	1.0184	118	119	10
	555	1.1867	113	933	0		555	0.5637	1	1028	0		555	1.0499	158	120	10
	556	1.1452	65	934	0		556	0.7024	0	1029	0		556	1.0366	141	121	10
	557	1.0708	82	935	0		557	0.6627	0	1030	0		557	1.031	138	122	10
	558	1.134	75	936	0		558	0.6264	0	1031	10		558	1.0047	143	123	10
	559	1.0668	116	937	0		559	0.6355	0	1032	10		559	1.0337	139	124	10
	560	1.1493	100	938	0		560	0.6078	2	1033	10		560	1.0369	111	125	10
	561	1.0462	117	939	0		561	0.5739	2	1034	10		561	1.0338	143	126	10
	562	1.1357	50	940	0		562	0.5576	1	1035	10		562	1.0473	118	127	10
	563	1.008	97	975	10		563	0.56	0	1036	10		563	1.0284	130	128	10
	564	1.0858	117	976	10		564	0.4812	4	1037	10		564	1.0346	132	129	10
	565	1.1148	92	977	10		565	0.4402	0	1038	10		565	1.0401	136	130	10
	566	1.1253	111	978	10		566	0.4676	0	1039	10		566	1.0307	131	131	10
	567	1.0946	85	979	10		567	0.6113	5	1040	10		567	1.0076	122	132	10
	568	1.1906	0	980	10		568	0.673	10	1041	10		568	1.0158	149	133	10
	569	1.1305	0	981	10		569	0.544	49	1042	10		569	1.0169	148	134	10
	570	1.0214	37	982	10		570	0.9175	120	1043	10		570	1.0385	143	135	10
	571	0.9679	98	983	0		571	1.1212	38	1044	0		571	1.0271	121	136	10
	572	1.0915	2	984	0		572	1.0636	99	1045	0		572	1.0366	112	137	10
	573	1.0158	10	985	0		573	1.1566	132	1046	0		573	1.0385	104	138	10
	574	0.9737	65	986	0		574	1.1837	125	1047	0		574	1.0733	99	139	10
	575	1.0102	37	987	0		575	1.2399	105	1048	0		575	1.0561	153	140	10
	576	0.9335	94	988	0		576	1.4205	53	1049	0		576	1.0171	130	141	10
	577	0.9072	109	989	0		577	1.0738	102	1050	0		577	1.0359	115	142	10
	578	0.9963	113	990	0		578	1.2143	90	1051	0		578	1.0263	142	143	10
	579	1.0312	34	991	0		579	1.2545	58	1052	0		579	1.0213	149	144	10
	580	0.9699	126	1045	10		580	1.2461	35	1053	0		580	1.0141	144	145	10
	581	1.0475	52	1046	10		581	1.099	32	1054	0		581	1.0426	98	146	10
	582	1.1839	66	1047	10		582	0.8563	53	1055	0		582	1.0171	82	147	10
	583	1.0537	98	1048	10		583	0.93	103	1056	0		583	1.0205	111	148	10
	584	1.1425	37	1049	0		584	1.0612	38	1057	0		584	1.0044	144	149	10
	585	1.0639	106	1050	0		585	0.9654	5	1058	0		585	0.9984	135	150	10
	586	1.0302	141	1051	0		586	0.8195	9	1059	0		586	0.9978	117	151	10
	587	1.1608	131	1052	0		587	0.7274	0	1060	0		587	1.0011	124	152	10
	588	1.1117	150	1053	0		588	0.7207	11	1061	0		588	1.0216	141	153	10
	589	1.1505	72	1054	0		589	0.6791	0	1062	0		589	1.0232	139	154	10
	590	1.1093	53	1055	0		590	0.6356	4	1063	0		590	0.9949	79	155	10
	591	1.1474	123	1056	0		591	0.6046	0	1064	0		591	1.0173	136	156	10
	592	1.1673	159	1057	0		592	0.5869	8	1065	0		592	1.0179	110	157	10
	593	1.1222	49	1058	0		593	0.5966	5	1066	0		593	1.0246	109	158	10
	594	1.0751	140	1147	10		594	0.6081	2	1067	0		594	1.0034	110	159	10
	595	1.3221	30	1148	10		595	0.5034	2	1068	0		595	1.0011	75	160	0
	596	1.1288	101	1149	10		596	0.5397	10	1069	0		596	1.0028	151	161	0
	597	1.1452	112	1150	10		597	0.5597	8	1070	0		597	1.033	103	162	0
	598	1.1904	25	1151	10		598	0.6012	0	1071	0		598	1.0315	90	163	0
	599	1.2031	17	1152	10		599	0.5947	2	1072	0		599	0.9989	111	164	0
	600	1.1839	17	1153	0		600	0.6097	15	1073	0		600	0.9987	38	165	0
	601	1.0585	22	1154	0		601	0.6429	71	1074	0		601	0.9812	61	166	0
	602	1.0901	0	1155	0		602	0.8664	71	1075	0		602	0.9632	75	167	0
	603	1.0713	13	1156	0		603	0.8634	103	1076	0		603	0.9837	100	168	0
	604	1.0758	1	1157	0		604	0.7949	80	1077	0		604	0.9619	61	169	0
	605	1.036	35	1158	0		605	0.8936	71	1120	10		605	1.0611	73	170	0
	606	1.0107	4	1159	0		606	0.8406	88	1121	10		606	1.0056	108	171	0
	607	1.0255	2	1160	0		607	0.8797	50	1122	10		607	1.0256	154	172	0
	608	0.9973	2	1161	0		608	1.1191	64	1123	10		608	1.017	125	173	0
	609	0.9869	17	1162	0		609	1.0498	33	1124	10		609	1.0507	128	174	0
	610	1.0702	22	1163	0		610	1.142	70	1125	0		610	1.0518	126	175	0
	611	1.0554	6	1164	0		611	1.3083	21	1126	0		611	1.026	122	176	0
	612	1.0336	0	1165	0		612	1.2414	39	1127	0		612	1.0273	110	177	0
	613	0.9772	0	1166	0		613	1.3943	75	1128	0		613	1.01	105	178	0
	614	1.0236	36				614	1.2409	11	1129	0		614	0.9557	0	179	0
	615	1.0393	15	12	0		615	1.0966	0	1130	0		615	0.9981	51	180	0
	616	0.9531	38	13	0		616	0.9258	16	1131	0		616	1.0267	118	181	10
	617	0.9596	14	14	10		617	0.8959	15	1132	0		617	1.013	147	182	10
	618	0.9545	0	15	10		618	0.8978	5	1133	0		618	1.0184	34	183	10
	619	0.9152	3	16	10		619	0.805	2	1134	0		619	1.0191	96	184	10
	620	1.0077	23	17	10		620	0.7402	0	1135	0		620	1.0174	98	185	10
	621	1.0168	0	18	10		621	0.6709	2	1136	0		621	0.9941	39	186	10
	622	0.9888	0	19	10		622	0.6427	1	1137	0		622	0.9836	77	187	10
	623	0.9137	86	20	10		623	0.6073	1	1138	0		623	0.977	16	188	10
	624	0.9467	123	34	0		624	0.6113	0	1139	0		624	0.8981	12	189	10
	625	1.0285	141	35	0		625	0.591	0	1140	0		625	0.9294	18	190	10
	626	1.3943	81	36	0		626	0.5778	6	1141	0		626	0.9841	6	191	10
	627	1.5451	66	37	0		627	0.6075	1	1142	0		627	1.0217	0	192	10
	628	1.3529	132	38	0		628	0.5881	0	1143	0		628	1.0351	12	193	10
	629	1.3936	144	39	0		629	0.5525	0	1144	0		629	1.028	0	194	10
	630	1.5499	72	40	0		630	0.5485	10	1145	0		630	0.9279	0	195	10
	631	1.3881	91	41	10		631	0.6173	0	1146	0		631	0.9851	11	196	10
	632	1.4696	91	42	10		632	0.6638	0	1147	0		632	0.9759	0	197	10
	633	1.4779	85	43	10		633	0.7085	1	1148	0		633	0.954	6	198	10
	634	1.4757	63	44	10		634	0.6537	2	1149	0		634	0.898	0	199	10
	635	1.2977	99	45	10		635	0.689	0	1150	0		635	0.884	0	200	10
	636	1.6457	47	46	10		636	0.7078	0	1159	10		636	0.8947	3	201	10
	637	1.6294	26	47	0		637	0.6309	2	1160	10		637	0.9155	0	202	10
	638	1.6154	9	48	0		638	0.6467	0	1161	0		638	0.9374	12	203	10
	639	1.5343	0	49	0		639	0.7048	21	1162	0		639	0.9873	0	204	10
	640	1.3542	50	50	0		640	0.8497	43	1163	0		640	0.9612	4	205	10
	641	1.4002	11	51	0		641	1.0374	108	1164	0		641	0.9708	76	206	10
	642	1.3998	6	52	10		642	1.4111	133	1165	0		642	0.9719	113	207	10
	643	1.2965	22	53	10		643	1.3686	64	1166	0		643	0.967	119	208	10
	644	1.156	4	54	10		644	1.3684	69	1167	0		644	0.9795	118	209	10
	645	1.0642	0	55	10		645	1.1626	53	1168	0		645	0.9942	146	210	10
	646	1.1743	13	56	10		646	1.2995	36	1169	0		646	0.9943	128	211	10
	647	1.1755	1	57	10		647	1.4403	98	1170	0		647	0.997	146	212	10
	648	1.1339	16	58	0		648	1.386	96	1171	0		648	1.0559	139	213	10
	649	1.123	3	59	0		649	1.3914	20	1172	0		649	1.0546	139	214	10
	650	1.1229	8	60	0		650	1.4529	0	1173	0		650	1.0532	134	223	0
	651	1.0141	31	61	0		651	1.3345	2	1174	0		651	1.0476	131	224	0
	652	0.9984	1	62	0		652	1.2309	0	1175	0		652	1.0416	120	225	10
	653	1.0293	3	63	0		653	1.1921	1	1176	10		653	1.0393	126	226	10
	654	0.9584	97	64	0		654	1.1078	0	1177	10		654	1.044	126	227	10
	655	1.0859	8	65	10		655	0.9815	1	1178	0		655	1.0628	134	228	10
	656	1.1143	0	66	10		656	0.8935	1	1179	0		656	1.0079	94	229	10
	657	1.1346	35	67	10		657	0.8184	0	1180	0		657	1.0089	119	230	10
	658	1.1307	2	68	10		658	0.7559	0	1181	0		658	1.0023	132	231	10
	659	1.0363	23	69	10		659	0.6797	1	1182	0		659	1.0099	142	232	10
	660	0.9796	56	70	10		660	0.6395	1	1183	0		660	1.0108	137	233	10
	661	1.1604	2	71	10		661	0.5939	3	1184	0		661	1.0102	138	234	10
	662	1.1749	0	109	0		662	0.5538	3	1185	0		662	1.0189	112	235	10
	663	1.1331	0	110	0		663	0.537	0	1186	0		663	1.0414	120	236	10
	664	1.0865	6	111	0		664	0.5017	0	1187	0		664	1.0452	105	237	10
	665	1.09	14	112	0		665	0.4925	0	1188	0		665	1.0455	107	238	10
	666	1.0798	1	113	0		666	0.4813	0	1189	0		666	1.0132	87	239	10
	667	1.0675	0	114	0		667	0.459	14	1190	0		667	0.9382	4	240	10
	668	1.0441	15	115	0		668	0.4802	8	1191	0		668	0.9452	14	241	10
	669	1.0927	0	116	0		669	0.6808	38				669	0.9448	16	242	10
	670	1.0467	15	117	0		670	0.6523	98	18	0		670	0.9401	0	243	0
	671	1.0584	1	118	0		671	0.9053	114	19	0		671	0.9418	0	244	0
	672	1.0401	2	119	10		672	0.9424	105	20	0		672	0.9333	2	245	0
	673	1.0032	7	120	10		673	0.9391	25	21	0		673	0.925	0	246	0
	674	0.9687	68	121	10		674	0.9501	2	22	0		674	0.9168	1	247	0
	675	1.0001	74	122	10		675	0.905	35	23	0		675	0.9138	1	248	0
	676	1.0981	94	123	10		676	0.972	4	24	0		676	0.9988	19	249	0
	677	1.4401	64	124	10		677	0.9432	36	25	0		677	0.9618	121	250	0
	678	1.5918	44	125	10		678	1.0904	2	26	10		678	1.0271	118	251	0
	679	1.3374	58	126	10		679	1.0936	5	27	10		679	0.9769	163	252	0
	680	1.1507	122	127	10		680	1.0962	5	28	10		680	0.9823	107	253	0
	681	1.3808	99	128	10		681	1.0727	5	29	10		681	1.0226	140	254	0
	682	1.4063	68	135	0		682	0.918	16	30	10		682	1.0041	143	255	0
	683	1.473	73	136	0		683	0.9273	0	31	10		683	1.0003	149	256	10
	684	1.4101	126	137	0		684	0.9209	0	32	10		684	0.9809	134	257	10
	685	1.3855	104	138	0		685	0.8949	5	33	10		685	0.9814	157	258	10
	686	1.6938	2	139	0		686	0.7466	51	34	10		686	1.0081	145	259	10
	687	1.5475	0	140	0		687	0.7025	84	35	10		687	0.9946	141	260	10
	688	1.4132	13	141	0		688	0.6607	44	36	10		688	1.0439	140	261	10
	689	1.3237	8	142	0		689	0.9082	69	37	10		689	1.0652	165	262	10
	690	1.2979	0	143	0		690	1.0352	58	38	10		690	1.1008	141	263	10
	691	1.2006	14	144	0		691	1.1247	91	39	10		691	1.1246	149	264	10
	692	1.2247	0	145	0		692	1.0119	129	40	10		692	1.1334	142	265	10
	693	1.1207	11	146	0		693	0.9542	75	41	0		693	1.0912	157	266	10
	694	1.1117	0	147	0		694	0.9902	90	42	0		694	1.1076	139	267	10
	695	1.0183	6	148	0		695	0.9276	34	43	10		695	1.0435	151	268	10
	696	0.9585	27	149	0		696	0.9575	6	44	10		696	1.0413	136	269	10
	697	1.0501	1	150	0		697	0.9657	6	45	10		697	1.0214	125	270	10
	698	0.9979	0	151	0		698	1.1048	0	46	10		698	1.0417	145	271	10
	699	1.0055	12	152	0		699	1.0267	23	47	10		699	1.0393	133	272	10
	700	1.0445	2	153	0		700	1.037	3	48	10		700	1.0034	125	273	10
	701	0.9913	5	154	0		701	1.0402	2	49	10		701	1.0219	146	274	0
	702	0.9676	9	155	0		702	0.9286	28	50	10		702	0.9944	128	275	0
	703	0.9758	6	156	0		703	0.9124	0	51	10		703	1.0168	137	276	0
	704	0.9487	26	157	0		704	0.8496	0	104	0		704	0.9957	94	277	0
	705	0.9388	24	158	0		705	0.7904	0	105	0		705	1.0382	137	278	0
	706	1.0217	9	159	0		706	0.7478	10	106	0		706	1.0644	138	279	0
	707	0.9345	13	160	10		707	0.95	12	107	0		707	1.0099	0	280	0
	708	0.8886	27	161	10		708	1.0583	0	108	0		708	1.0189	63	281	0
	709	0.9903	36	162	10		709	1.0572	0	109	0		709	0.999	151	282	0
	710	1.1706	23	163	10		710	1.0395	0	110	0		710	1.0048	142	283	0
	711	1.2325	49	164	10		711	0.922	8	111	0		711	1.0121	157	284	0
	712	1.2717	62	165	10		712	0.9118	6	112	0		712	0.9958	143	285	0
	713	1.3559	97	166	10		713	0.8295	0	113	0		713	0.9853	136	286	0
	714	1.3475	59	167	10		714	0.8142	1	114	0		714	0.9683	89	287	10
	715	1.3818	115	168	10		715	0.913	0	115	0		715	0.9533	61	288	10
	716	1.3643	58	169	10		716	0.8809	0	116	0		716	0.9934	88	289	10
	717	1.4845	53	170	10		717	0.9426	0	117	0		717	1.0603	18	290	10
	718	1.384	0	171	10		718	0.9762	0	118	0		718	1.0171	116	291	10
	719	1.358	0	172	10		719	0.9443	0	119	0		719	0.987	65	292	10
	720	1.2299	0	173	10		720	0.8068	0	120	0		720	1.0226	108	293	10
	721	1.2144	23	174	10		721	0.851	0	121	0		721	1.078	140	294	0
	722	1.1212	1	175	10		722	0.9419	0	122	0		722	1.0359	93	295	0
	723	1.0797	24	176	10		723	0.99	0	123	0		723	1.0624	67	296	0
	724	1.1141	0	177	10		724	0.9316	0	124	0		724	1.08	117	297	0
	725	1.0577	0	178	10		725	0.8145	37	125	0		725	1.0206	92	298	0
	726	1.0192	14	179	10		726	1.0529	70	126	10		726	0.9246	18	299	0
	727	1.0141	0	207	0		727	1.0364	64	127	10		727	0.9762	17	300	0
	728	0.9641	0	208	0		728	1.5545	21	128	10		728	0.9452	7	301	0
	729	0.9223	9	209	0		729	1.6255	110	129	10		729	0.8997	0	302	0
	730	0.9638	18	210	0		730	1.4886	115	130	10		730	0.8919	2	303	0
	731	0.9498	0	211	0		731	1.6166	75	131	10		731	0.8973	2	304	0
	732	0.9696	2	212	0		732	1.4054	63	132	10		732	0.8759	0	305	0
	733	0.9154	10	213	10		733	1.4101	42	133	10		733	0.9951	112	306	0
	734	0.8513	0	214	10		734	1.8186	60	134	10		734	0.9978	115	307	0
	735	0.8757	0	215	10		735	1.5212	52	135	10		735	1.0011	25	308	0
	736	0.8747	0	216	10		736	1.5223	61	136	10		736	0.99	3	309	0
	737	0.8593	13	217	10		737	1.4795	53	137	10		737	0.9985	5	310	0
	738	0.9147	19	218	10		738	1.6293	34	140	0		738	1.002	10	311	0
	739	0.9046	75	219	10		739	1.6739	10	141	0		739	0.9978	0	312	0
	740	0.9827	93	227	0		740	1.6617	33	142	0		740	0.9887	20	313	10
	741	1.115	109	228	0		741	1.5084	9	143	0		741	0.9821	2	314	10
	742	1.3521	78	229	0		742	1.2259	10	144	0		742	0.98	0	315	10
	743	1.2834	89	230	0		743	1.0902	4	145	0		743	0.9483	3	316	10
	744	1.4388	3	231	0		744	0.9588	7	146	0		744	0.9702	12	317	10
	745	1.3068	3	232	0		745	0.916	0	147	0		745	0.9613	0	318	10
	746	1.2312	23	233	0		746	0.865	9	148	0		746	0.9653	3	319	10
	747	1.1552	6	234	0		747	0.8489	0	149	0		747	0.9429	7	324	0
	748	1.0908	14	235	0		748	0.7985	8	150	0		748	0.9266	7	325	0
	749	1.0802	0	236	0		749	0.7614	3	151	0		749	0.9324	5	326	0
	750	0.9932	26	237	0		750	0.79	8	152	0		750	0.9346	16	327	0
	751	1.0019	0	238	0		751	0.9242	3	153	0		751	0.9807	122	328	0
	752	0.9412	30	239	0		752	0.9117	7	154	0		752	1.0139	112	329	0
	753	0.9583	0	240	0		753	0.8983	4	155	0		753	0.9891	145	330	10
	754	0.9177	18	241	0		754	0.9328	0	156	0		754	0.9998	150	331	10
	755	0.9006	0	242	0		755	0.9426	10	157	0		755	1.0278	165	332	10
	756	0.8796	0	243	0		756	0.883	0	158	0		756	1.0379	138	333	10
	757	0.8654	6	244	0		757	0.8408	0	159	0		757	1.0704	129	334	10
	758	0.8488	16	245	0		758	0.8095	0	160	0		758	1.071	135	335	10
	759	0.8511	3	246	0		759	0.8285	0	161	0		759	1.0462	103	336	10
	760	0.8417	0	247	0		760	0.8834	0	162	0		760	1.0526	129	337	0
	761	0.8297	9	248	0		761	0.8841	3	163	0		761	1.0029	75	338	0
	762	0.848	0	249	0		762	0.872	35	164	0		762	1.0148	56	339	0
	763	0.8097	0	250	0		763	1.0537	73	165	0		763	1.0125	54	340	0
	764	0.8246	51	251	10		764	1.1558	47	166	0		764	1.0304	59	341	0
	765	0.8578	26	252	10		765	1.3356	105	167	0		765	1.106	64	342	0
	766	0.991	60	253	10		766	1.2687	112	168	0		766	1.1718	6	343	0
	767	0.9835	54	254	10		767	1.5371	64	169	10		767	1.0929	42	344	0
	768	1.0301	21	255	10		768	1.3322	42	170	10		768	1.0638	20	345	0
	769	1.0357	94	256	10		769	1.3775	61	171	10		769	1.008	10	346	0
	770	1.1289	129	257	10		770	1.594	46	172	10		770	0.9436	16	347	0
	771	1.1355	127	258	10		771	1.5642	47	173	10		771	0.9422	7	348	0
	772	1.0616	136	259	10		772	1.4212	71	174	10		772	0.9852	40	349	0
	773	1.0472	63	260	10		773	1.6288	46	175	10		773	1.0081	53	350	0
	774	1.0649	0	261	10		774	1.5913	2	176	10		774	0.9615	4	351	0
	775	0.9711	6	262	10		775	1.2714	12	177	10		775	0.9798	41	352	0
	776	0.9149	10	276	0		776	1.2301	17	178	10		776	0.9326	7	353	0
	777	0.8998	43	277	0		777	1.1598	4	231	0		777	0.9235	0	354	0
	778	0.9907	0	278	0		778	0.9916	6	232	0		778	0.926	0	355	0
	779	0.8821	27	279	0		779	1.0574	7	233	0		779	0.9232	0	356	0
	780	0.8825	5	280	0		780	0.9133	2	234	0		780	0.9281	4	357	0
	781	0.8636	3	281	0		781	0.8747	8	235	0		781	0.9768	60	358	0
	782	0.8512	2	282	0		782	0.7856	14	236	0		782	1.0358	125	359	0
	783	0.8013	18	283	0		783	0.8016	0	237	0		783	1.0127	78	360	0
	784	0.8128	1	284	0		784	0.8009	2	238	0		784	1.0036	139	361	10
	785	0.791	15	285	0		785	0.7935	2	239	0		785	1.042	150	362	10
	786	0.7998	0	286	0		786	0.7557	0	240	0		786	1.0279	121	363	10
	787	0.8168	17	287	10		787	0.8111	2	241	0		787	1.0075	114	364	10
	788	0.8127	2	288	10		788	0.8152	3	242	0		788	1.0526	113	365	10
	789	0.8325	0	289	10		789	0.8513	0	243	0		789	1.0929	50	366	10
	790	0.8013	11	290	10		790	0.7693	14	244	0		790	1.1236	129	367	10
	791	0.7835	31	291	10		791	0.7956	0	245	0		791	1.1183	59	368	10
	792	0.8291	9	292	10		792	0.8263	0	246	0		792	1.092	20	623	0
	793	0.833	2	302	0		793	0.8326	4	247	0		793	1.1089	9	624	0
	794	0.8299	4	303	0		794	0.822	0	248	0		794	1.1327	93	625	0
	795	0.8222	1	304	0		795	0.8486	0	249	0		795	1.1608	131	626	0
	796	0.8316	10	305	0		796	0.9627	8	250	0		796	1.1529	109	627	0
	797	0.8239	0	306	0		797	0.9551	10	251	0		797	1.118	96	628	0
	798	0.802	0	307	0		798	1.0555	3	252	0		798	1.1143	73	629	0
	799	0.795	40	308	0		799	0.9167	10	253	0		799	1.0893	74	630	0
	800	0.7837	17	309	0		800	0.8984	7	254	0		800	1.1435	4	631	0
	801	0.7996	9	310	0		801	0.8912	41	255	0		801	1.1082	23	632	0
	802	0.7766	0	311	10		802	0.9536	6	256	0		802	1.0695	5	633	0
	803	0.7452	0	312	10		803	1.0857	17	257	0		803	1.0506	14	634	0
	804	0.7841	21	313	10		804	1.1309	48	258	0		804	1.0669	19	635	0
	805	0.7946	0	314	10		805	1.3771	134	259	0		805	1.1243	5	636	0
	806	0.8077	0	315	10		806	1.4678	90	260	10		806	1.0803	2	637	0
	807	0.8069	0	316	10		807	1.2662	105	261	10		807	1.0765	6	638	0
	808	0.7924	0	317	10		808	1.2201	114	262	10		808	1.0807	10	639	0
	809	0.7881	0	318	10		809	1.1816	160	263	10		809	1.0472	1	640	10
	810	0.7851	1	319	10		810	1.202	100	264	10		810	0.992	6	641	10
	811	0.7635	28	320	10		811	1.0933	100	265	10		811	0.9778	3	642	10
	812	0.7581	5	336	0		812	1.5399	72	266	10		812	0.973	2	643	10
	813	0.805	17	337	0		813	1.4473	66	267	10		813	0.9603	3	644	10
	814	0.8386	7	338	0		814	1.6155	82	268	10		814	1.0074	3	645	10
	815	0.8387	0	339	0		815	1.728	59	345	0		815	1.0111	2	646	10
	816	0.8135	1	340	0		816	1.7185	63	346	0		816	1.0063	6	647	10
	817	0.7984	3	341	0		817	1.7634	17	347	0		817	0.9836	0	648	10
	818	0.8158	21	342	0		818	1.7063	13	348	0		818	0.995	3	649	10
	819	0.8319	2	343	0		819	1.3764	1	349	0		819	1.0356	10	650	10
	820	0.8308	48	344	0		820	1.1312	2	350	0		820	1.0493	88	651	10
	821	0.8469	34	345	0		821	1.0737	0	351	0		821	1.0892	132	652	10
	822	0.8892	63	346	0		822	0.9797	3	352	0		822	1.0943	113	653	10
	823	0.9526	66	347	0		823	0.8764	5	353	0		823	1.1322	106	654	10
	824	0.975	66	348	0		824	0.8546	8	354	0		824	1.09	140	655	10
	825	0.9245	98	349	0		825	0.7566	7	355	0		825	1.0732	145	656	10
	826	0.8919	86	350	0		826	0.7234	9	356	0		826	1.0675	141	657	10
	827	0.9127	93	351	0		827	0.7283	3	357	0		827	1.0958	66	658	10
	828	1.0613	12	352	0		828	0.7795	5	358	0		828	1.0668	19	659	10
	829	1.0332	0	353	0		829	0.799	0	359	0		829	1.0269	13	660	10
	830	0.9663	0	354	0		830	0.7543	0	360	0		830	1.0117	3	661	10
	831	0.924	2	355	10		831	0.7183	0	361	0		831	0.9645	13	662	10
	832	0.8778	0	356	10		832	0.7055	3	362	10		832	0.9828	3	663	10
	833	0.8599	0	357	10		833	0.751	16	363	10		833	0.9983	3	664	10
	834	0.8273	17	358	10		834	0.7934	1	364	10		834	0.9664	14	665	10
	835	0.8035	2	359	10		835	0.7975	3	365	10		835	0.9799	8	666	10
	836	0.8081	3	360	10		836	0.8419	4	366	10		836	1.1053	22	667	0
	837	0.7812	1	361	10		837	0.7237	46	367	10		837	1.0733	0	668	0
	838	0.7799	7	362	10		838	0.8291	91	368	10		838	1.1544	12	669	0
	839	0.7692	6	363	10		839	0.9669	65	369	10		839	1.0635	17	670	0
	840	0.7654	33	364	10		840	1.1014	72	370	10		840	1.0622	1	671	0
	841	0.7875	13	428	0		841	1.0349	112	371	10		841	1.0167	0	672	0
	842	0.7837	0	429	0		842	1.1382	92	372	10		842	1.0173	8	673	0
	843	0.7562	23	430	0		843	1.1736	79	373	10		843	1.0153	9	674	0
	844	0.7404	14	431	0		844	1.2205	43	374	10		844	1.065	65	675	0
	845	0.7551	0	432	0		845	1.233	132	375	10		845	1.0696	142	676	10
	846	0.7222	1	433	0		846	1.2071	143	376	0		846	1.058	110	677	10
	847	0.7601	24	434	0		847	1.1907	122	377	0		847	1.1055	107	678	10
	848	0.7574	10	435	0		848	1.277	66	378	0		848	1.1142	70	679	10
	849	0.7386	0	436	0		849	1.3561	94	379	0		849	1.129	111	680	10
	850	0.7952	0	437	0		850	1.5084	82	380	0		850	1.0044	17	681	10
	851	0.7693	35	438	0		851	1.3942	55	381	0		851	0.9625	12	682	10
	852	0.7413	11	439	0		852	1.6739	54	382	0		852	0.9792	27	683	10
	853	0.7284	0	440	10		853	1.4829	10	383	0		853	0.957	12	684	10
	854	0.7556	3	441	10		854	1.3708	0	384	0		854	0.9556	0	685	10
	855	0.7536	2	442	10		855	1.0519	4	385	10		855	1.0022	25	686	10
	856	0.747	0	443	10		856	0.8729	2	386	10		856	0.9593	8	687	10
	857	0.739	14	444	10		857	0.8065	0	387	10		857	0.9913	14	688	10
	858	0.7779	0	445	10		858	0.775	0	388	10		858	0.9374	0	689	10
	859	0.7379	11	446	10		859	0.7384	5	389	10		859	0.9305	1	690	10
	860	0.8001	10	455	0		860	0.7703	22	390	10		860	0.9642	11	691	10
	861	0.7894	15	456	0		861	0.7235	2	391	10		861	0.9433	9	692	10
	862	0.7682	0	457	0		862	0.6688	2	392	10		862	0.9639	0	693	10
	863	0.786	6	458	10		863	0.6205	8	393	10		863	0.9635	4	694	10
	864	0.7903	3	459	10		864	0.6477	7	394	0		864	0.9476	0	695	10
	865	0.7635	28	460	10		865	0.6616	2	395	0		865	0.9392	5	696	10
	866	0.7658	0	461	10		866	0.6345	24	396	0		866	0.9535	2	697	10
	867	0.7594	0	462	10		867	0.6941	31	397	0		867	1.0458	4	698	10
	868	0.7679	17	463	10		868	0.7914	54	398	0		868	1.0302	0	699	10
	869	0.7658	7	464	0		869	0.7316	74	399	0		869	1.0289	0	700	10
	870	0.787	0	465	0		870	1.03	59	400	0		870	1.0387	0	701	10
	871	0.768	0	466	0		871	0.9997	56	401	0		871	1.0182	0	702	10
	872	0.7728	0	467	0		872	1.1096	103	402	10		872	1.0482	0	703	10
	873	0.7558	17	468	0		873	1.0601	144	403	10		873	1.0575	0	704	10
	874	0.7195	0	469	0		874	1.0039	130	404	10		874	1.0643	0	705	10
	875	0.7306	7	470	0		875	0.885	65	405	10		875	1.0562	18	706	10
	876	0.7295	3	471	0		876	1.2586	45	406	10		876	1.07	0	735	0
	877	0.7424	3	472	0		877	1.2163	68	407	10		877	1.0866	0	736	0
	878	0.7425	26	473	0		878	1.3269	62	408	10		878	1.0567	4	737	0
	879	0.7797	7	474	10		879	1.3142	14	409	10		879	1.0474	17	738	0
	880	0.7729	5	475	10		880	1.1145	29	410	10		880	0.9454	6	739	0
	881	0.7627	19	476	10		881	1.25	3	411	10		881	0.9654	19	740	0
	882	0.7659	1	477	10		882	1.0662	17	412	10		882	0.9623	1	741	0
	883	0.7547	0	478	10		883	0.9354	30	413	10		883	0.9526	1	742	0
	884	0.7755	17	479	10		884	0.9227	18	414	10		884	0.9604	8	743	0
	885	0.7745	8	509	0		885	0.7951	41	420	0		885	1.0503	151	744	0
	886	0.7633	12	510	0		886	0.8548	51	421	0		886	1.0363	35	745	0
	887	0.8055	43	511	0		887	0.8018	16	422	0		887	1.1344	55	746	0
	888	0.745	77	512	0		888	0.7399	83	423	0		888	1.0875	76	747	0
	889	0.836	113	513	0		889	0.6632	127	424	10		889	1.0818	133	748	0
	890	0.9091	50	514	0		890	0.689	142	425	10		890	1.0712	129	749	0
	891	0.8567	115	515	0		891	0.7261	113	426	10		891	1.0694	140	750	10
	892	0.8615	105	516	10		892	0.8763	54	427	10		892	1.0852	146	751	10
	893	0.8544	113	517	10		893	0.832	78	428	10		893	1.0457	130	752	10
	894	0.8033	135	518	10		894	1.1309	54	429	10		894	1.0558	124	753	10
	895	0.8367	72	519	10		895	1.3216	5	430	10		895	1.0744	146	754	10
	896	0.8094	23	520	10		896	1.2549	19	431	10		896	1.1229	138	755	10
	897	0.8407	6	521	10		897	1.113	3	432	10		897	1.063	126	756	10
	898	0.8124	3	522	10		898	1.0651	6	433	10		898	1.0404	127	757	10
	899	0.7921	16	523	10		899	0.9884	6	434	10		899	1.0818	109	758	10
	900	0.8069	24	524	10		900	0.9269	13	435	10		900	1.1126	128	759	10
	901	0.7885	12	525	0		901	0.928	4	436	10		901	1.0828	122	760	10
	902	0.7936	10	526	0		902	0.9335	11	437	10		902	1.052	131	761	10
	903	0.7662	0	527	0		903	0.9451	6	438	10		903	1.0392	108	762	10
	904	0.7656	10	528	0		904	0.8473	12	439	10		904	1.066	124	763	10
	905	0.7493	0	529	10		905	0.7985	63	440	10		905	1.0877	139	764	10
	906	0.759	0	530	10		906	0.9341	65	441	10		906	1.0579	122	765	10
	907	0.7364	23	531	10		907	1.0276	81	442	10		907	1.0646	114	774	0
	908	0.7588	6	532	10		908	1.1869	55	443	10		908	1.0585	114	775	0
	909	0.7369	6	533	10		909	1.2353	74	444	0		909	1.0528	56	776	0
	910	0.7364	47	534	10		910	1.5014	107	445	0		910	1.1638	126	777	0
	911	0.739	27	535	10		911	1.2414	154	446	10		911	1.0736	103	778	0
	912	0.7746	84	598	0		912	1.1688	131	447	10		912	0.971	17	779	0
	913	0.7609	54	599	0		913	1.1531	98	448	10		913	0.9736	6	780	10
	914	0.8268	94	600	0		914	1.1728	91	449	10		914	0.9869	15	781	10
	915	0.8488	61	601	0		915	1.23	78	450	10		915	0.9689	6	782	10
	916	0.8493	5	602	0		916	1.3944	75	451	10		916	0.9579	9	783	10
	917	0.8242	9	603	0		917	1.3211	19	452	10		917	0.9453	0	784	10
	918	0.8263	13	604	0		918	1.2619	23	453	10		918	0.9651	10	785	10
	919	0.8247	1	605	0		919	1.2019	108	454	10		919	0.934	11	786	10
	920	0.8167	3	606	0		920	1.1429	95	463	0		920	0.9452	22	787	10
	921	0.779	17	607	0		921	1.0912	111	464	0		921	0.9455	19	788	10
	922	0.7875	4	608	0		922	1.1706	150	465	0		922	0.9456	0	789	10
	923	0.7692	0	609	0		923	1.1956	116	466	0		923	0.9764	5	790	10
	924	0.7671	16	610	0		924	1.174	92	467	0		924	0.9566	0	791	10
	925	0.7737	73	611	0		925	1.2942	112	468	0		925	0.954	4	800	0
	926	0.7896	81	612	0		926	1.2799	91	469	10		926	0.9789	23	801	0
	927	0.834	59	613	0		927	1.2608	88	470	10		927	0.9822	17	802	0
	928	0.8789	64	614	0		928	1.2426	112	471	10		928	0.9148	0	803	0
	929	0.9442	0	615	0		929	1.1271	88	472	10		929	0.9139	0	804	0
	930	0.9289	5	616	0		930	1.1433	134	473	10		930	1.005	23	805	0
	931	0.8946	21	617	0		931	1.1793	135	474	10		931	0.9661	10	806	0
	932	0.8962	6	618	0		932	1.1508	143	475	10		932	0.9896	15	807	0
	933	0.8849	6	619	0		933	1.1199	130	476	10		933	0.9825	1	808	0
	934	0.8372	13	620	0		934	1.0267	118	477	10		934	0.9609	0	809	0
	935	0.8234	2	621	0		935	0.993	130	478	10		935	0.977	0	810	0
	936	0.8477	0	622	10		936	1.092	117	479	10		936	0.9748	0	811	0
	937	0.8128	10	623	10		937	1.0563	110	480	10		937	1.039	84	812	0
	938	0.8358	27	624	10		938	0.9625	106	481	10		938	1.0129	116	813	0
	939	0.8379	1	625	10		939	1.176	87	482	0		939	1.0202	113	814	0
	940	0.848	29	626	10		940	1.2187	0	483	0		940	1.0382	126	815	0
	941	0.8189	52	627	10		941	1.0645	6	484	0		941	0.9859	61	816	0
	942	0.8499	9	628	10		942	1.0023	6	485	10		942	1.0052	90	817	0
	943	0.8923	58	629	10		943	0.9174	12	486	10		943	0.9672	55	818	0
	944	0.9619	13	630	10		944	0.8547	8	487	10		944	0.9497	8	819	10
	945	0.9412	0	631	10		945	0.8406	0	488	10		945	0.9361	2	820	10
	946	0.9711	7	632	10		946	0.7375	36	489	10		946	0.9384	1	821	10
	947	0.9576	10	633	10		947	0.8197	97	490	10		947	0.9458	0	822	10
	948	0.9265	29	634	10		948	0.8465	131	491	10		948	1.0168	56	823	10
	949	0.9048	14	635	10		949	0.8129	106	492	10		949	0.9985	115	824	10
	950	0.9058	6	636	10		950	0.8691	71	493	10		950	1.006	55	825	10
	951	0.8467	18	661	0		951	0.8457	127	494	10		951	1.0141	94	826	10
	952	0.8231	30	662	0		952	0.865	98	495	10		952	1.0288	83	827	10
	953	0.8823	57	663	0		953	0.9336	89	496	10		953	1.0116	129	828	0
	954	0.9707	13	664	0		954	0.8502	93	497	10		954	0.9896	119	829	0
	955	0.9756	12	665	0		955	0.943	107	498	10		955	0.9932	128	830	0
	956	0.9501	37	666	0		956	0.9469	125	499	10		956	0.963	39	831	0
	957	0.9879	8	667	0		957	0.9894	129	500	10		957	0.9921	95	832	0
	958	0.918	22	668	0		958	0.984	125	501	10		958	1.0253	57	833	0
	959	0.9227	14	669	0		959	1.0228	81	502	10		959	1.0134	108	834	0
	960	0.8965	61	670	0		960	1.0355	77	507	0		960	1.0126	135	835	0
	961	0.889	16	671	0		961	1.1367	93	508	0		961	1.0206	146	836	0
	962	0.9542	9	672	0		962	1.5323	5	509	0		962	1.0027	123	837	0
	963	0.9748	10	673	10		963	1.2592	7	510	0		963	1.015	147	838	0
	964	0.9723	4	674	10		964	1.1579	14	511	0		964	1.0112	146	839	0
	965	0.9035	20	675	10		965	1.0692	3	512	0		965	0.991	146	840	0
	966	0.8518	48	676	10		966	1.0321	2	513	0		966	1.0222	123	841	0
	967	0.9561	86	677	10		967	0.9833	37	514	0		967	1.0258	157	842	0
	968	0.9697	16	678	10		968	0.8923	121	515	0		968	1.0267	125	843	10
	969	1.1609	30	679	10		969	0.9657	127	516	0		969	1.0046	150	844	10
	970	1.0797	35	680	10		970	0.9666	126	517	0		970	1.0038	109	845	10
	971	1.1262	54	681	10		971	0.8822	109	518	0		971	1.0007	131	846	10
	972	0.9714	11	682	10		972	0.9054	139	519	0		972	1.028	129	847	10
	973	0.9887	28	683	10		973	0.905	100	520	0		973	0.9942	53	848	10
	974	1.0456	11	684	10		974	0.9766	125	521	0		974	1.015	69	849	10
	975	0.9777	40	685	10		975	0.9797	118	522	0		975	1.0253	104	912	0
	976	0.9401	78	686	0		976	0.8889	117	523	10		976	0.9972	18	913	0
	977	0.9663	80	687	0		977	0.9995	81	524	10		977	0.995	43	914	0
	978	1.0763	106	688	0		978	0.9803	87	525	10		978	0.986	88	915	0
	979	1.1281	149	689	0		979	1.0627	5	526	10		979	0.9891	128	916	0
	980	1.1719	104	690	0		980	1.0415	5	527	10		980	1.0133	97	917	0
	981	1.1784	79	691	0		981	1.0328	0	528	10		981	1.0188	87	918	0
	982	1.0605	107	692	0		982	1.0097	62	529	10		982	0.9876	143	919	0
	983	1.1303	73	693	0		983	0.8749	117	530	10		983	1.0198	113	920	0
	984	1.2069	5	694	0		984	0.8355	151	531	10		984	1.0137	93	921	0
	985	1.1446	5	695	0		985	0.8189	50	532	10		985	1.0276	26	922	0
	986	1.1213	18	696	0		986	0.8584	88	533	10		986	1.0033	14	923	0
	987	1.0943	4	697	0		987	0.9615	123	534	10		987	1.0403	64	924	0
	988	1.0347	20	698	0		988	1.1196	44	535	10		988	1.0259	79	925	0
	989	1.0108	0	699	0		989	1.0667	0	536	10		989	1.0068	43	926	0
	990	0.9915	10	700	0		990	0.9533	4	537	10		990	1.0064	114	927	0
	991	0.9612	17	701	0		991	0.9	5	538	10		991	1.0055	103	928	0
	992	0.9797	81	702	0		992	0.8667	4	539	10		992	1.0047	128	929	0
	993	1.1482	51	703	0		993	0.8009	1	584	0		993	0.9859	118	930	0
	994	1.0624	121	704	0		994	0.7755	10	585	0		994	1.0353	148	931	0
	995	1.1848	53	705	0		995	0.746	6	586	0		995	1.008	144	932	0
	996	1.2408	6	706	0		996	0.7228	3	587	0		996	1.0491	168	933	0
	997	1.0911	93	707	0		997	0.7116	1	588	0		997	1.0633	146	934	0
	998	1.0742	80	708	0		998	0.7483	3	589	0		998	1.0781	147	935	0
	999	0.9511	113	709	0		999	0.718	78	590	0		999	1.0919	115	936	10
	1000	1.0181	138	710	10		1000	0.7866	121	591	0		1000	1.078	133	937	10
	1001	1.1718	95	711	10		1001	0.9105	127	592	0		1001	1.0644	129	938	10
	1002	1.0757	133	712	10		1002	0.9531	132	593	0		1002	1.0603	49	939	10
	1003	1.0766	114	713	10		1003	0.9521	62	594	0		1003	1.0585	62	940	10
	1004	1.0813	131	714	10		1004	0.958	133	595	0		1004	1.0714	126	941	10
	1005	1.1785	97	715	10		1005	0.934	139	596	0		1005	1.026	106	942	10
	1006	1.0707	125	716	10		1006	0.9303	143	597	0		1006	1.0634	25	943	10
	1007	1.1098	110	717	10		1007	0.9787	147	598	0		1007	1.0659	68	944	0
	1008	1.1225	113	718	0		1008	0.9961	104	599	0		1008	1.0004	113	945	0
	1009	1.102	117	719	0		1009	1.0467	114	600	10		1009	1.0368	143	946	0
	1010	1.0852	120	720	0		1010	0.983	116	601	10		1010	1.0351	57	947	10
	1011	1.1073	110	721	0		1011	1.0052	81	602	10		1011	1.0328	3	948	10
	1012	1.1323	100	722	0		1012	1.2531	44	603	10		1012	1.0177	41	949	10
	1013	1.0362	146	723	0		1013	1.2025	35	604	10		1013	1.014	121	950	10
	1014	1.0694	105	724	0		1014	0.9231	82	605	10		1014	1.0179	73	951	10
	1015	1.0361	117	725	0		1015	1.1742	67	606	10		1015	1.0031	99	952	10
	1016	1.1347	90	726	0		1016	1.1781	63	607	10		1016	1.0324	73	953	10
	1017	1.1501	122	727	0		1017	1.0377	76	608	10		1017	0.9679	23	954	10
	1018	1.0667	104	728	0		1018	1.0358	0	614	0		1018	1.0031	49	955	10
	1019	1.0552	95	729	0		1019	0.9088	22	615	0		1019	1.0544	79	1084	0
	1020	1.049	109	730	0		1020	0.9124	10	616	0		1020	0.9965	116	1085	0
	1021	1.0988	69	731	0		1021	0.8878	4	617	0		1021	0.9872	37	1086	0
	1022	1.0118	135	732	0		1022	0.8115	0	618	0		1022	0.9181	1	1087	10
	1023	1.0521	132	733	0		1023	0.7665	0	619	0		1023	0.9496	39	1088	10
	1024	1.0763	122	734	0		1024	0.7271	6	620	0		1024	1.0259	34	1089	10
	1025	1.1491	103	735	0		1025	0.8289	3	621	0		1025	0.9934	129	1090	10
	1026	1.1777	108	736	0		1026	0.8393	4	622	0		1026	0.9862	30	1091	10
	1027	1.0628	130	737	0		1027	0.8768	1	623	0		1027	0.991	108	1092	10
	1028	1.0865	99	738	10		1028	0.8533	18	624	0		1028	0.9967	139	1093	10
	1029	1.0831	130	739	10		1029	0.8167	3	625	0		1029	1.0026	132	1094	0
	1030	1.1445	88	740	10		1030	0.819	0	626	0		1030	1.0244	140	1095	0
	1031	1.1287	32	741	10		1031	0.7519	42	627	0		1031	1.0405	141	1096	10
	1032	1.1175	46	742	10		1032	0.794	85	628	0		1032	0.9875	153	1097	10
	1033	1.1399	104	743	10		1033	0.9663	127	629	0		1033	1.0419	161	1098	10
	1034	1.1305	79	828	0		1034	1.1453	124	630	0		1034	1.0185	124	1099	10
	1035	1.17	117	829	0		1035	1.0278	100	631	0		1035	1.021	138	1100	10
	1036	1.0774	118	830	0		1036	1.007	70	632	0		1036	1.0433	148	1101	10
	1037	1.138	144	831	0		1037	1.1046	95	633	0		1037	1.0265	132	1102	10
	1038	1.1514	112	832	0		1038	1.0306	139	634	0		1038	1.0158	113	1103	10
	1039	1.1524	61	833	0		1039	1.0525	110	635	0		1039	1.0402	140	1104	10
	1040	1.1312	59	834	0		1040	1.0218	125	636	0		1040	1.0031	150	1105	10
	1041	1.0704	89	835	0		1041	1.0796	98	637	0		1041	0.981	137	1106	10
	1042	1.0756	83	836	0		1042	1.1214	109	638	0		1042	0.9889	121	1107	10
	1043	1.2501	50	837	0		1043	1.1149	93	639	10		1043	1.0021	126	1108	10
	1044	1.1487	29	838	0		1044	1.1935	41	640	10		1044	1.0138	84	1109	10
	1045	1.067	129	839	0		1045	1.3873	11	641	10		1045	1.0052	13	1110	10
	1046	1.1729	112	840	0		1046	1.2782	9	642	10		1046	1.0094	127	1111	10
	1047	1.3232	51	841	0		1047	1.1987	4	643	10		1047	0.9956	133	1112	10
	1048	1.1897	101	842	0		1048	1.1151	0	644	10		1048	0.9813	142	1113	10
	1049	1.1801	70	843	0		1049	1.0719	2	645	10		1049	0.9691	105	1114	10
	1050	1.2789	21	844	0		1050	1.059	1	673	0		1050	0.9639	24	1115	10
	1051	1.2667	12	845	0		1051	1.0329	0	674	0		1051	0.9841	56	1116	10
	1052	1.1728	28	846	0		1052	0.9088	2	675	0		1052	0.9704	119	1117	10
	1053	1.0975	20	847	0		1053	0.8228	2	676	0		1053	0.9916	143	1118	10
	1054	1.0593	19	848	0		1054	0.8084	6	677	0		1054	1.0179	160	1119	0
	1055	1.0351	11	849	0		1055	0.7995	1	678	0		1055	1.0458	142	1120	0
	1056	0.9956	15	850	0		1056	0.7679	3	679	0		1056	1.0683	147	1121	0
	1057	0.9918	11	851	0		1057	0.6992	7	680	0		1057	1.0636	142	1122	0
	1058	0.9566	18	852	0		1058	0.6878	5	681	0		1058	1.024	145	1123	0
	1059	0.9255	54	853	0		1059	0.6508	5	682	0		1059	1.0429	113	1124	0
	1060	0.9913	67	854	0		1060	0.7292	2	683	0		1060	1.0508	134	1125	0
	1061	1.015	79	855	0		1061	0.7607	0	684	0		1061	1.0465	146	1126	0
	1062	1.0557	39	856	0		1062	0.7854	1	685	10		1062	1.0384	124	1127	0
	1063	1.1966	42	857	0		1063	0.7821	2	686	10		1063	0.9984	85	1128	0
	1064	1.2388	73	858	0		1064	0.7718	2	687	10		1064	1.0177	15	1129	0
	1065	1.1723	93	859	0		1065	0.7392	5	688	10		1065	1.0289	89	1130	0
	1066	1.2659	62	860	0		1066	0.7635	0	689	10		1066	1.0048	119	1131	0
	1067	1.2071	85	861	0		1067	0.7933	5	690	10		1067	0.9898	120	1132	0
	1068	1.1197	88	862	0		1068	0.7802	6	691	10		1068	1.013	144	1133	0
	1069	1.137	88	863	0		1069	0.7633	20	692	10		1069	0.9816	135	1134	0
	1070	1.284	84	864	0		1070	0.7739	8	693	10		1070	0.9787	114	1135	0
	1071	1.2177	144	865	0		1071	0.7995	3	694	10		1071	0.9735	22	1136	0
	1072	1.1877	94	866	0		1072	0.8068	2	738	0		1072	0.9391	11	1137	0
	1073	1.2355	87	867	0		1073	0.8204	7	739	0		1073	0.9866	115	1138	0
	1074	1.1838	98	868	0		1074	0.8358	4	740	0		1074	0.9961	134	1139	0
	1075	1.1817	78	869	0		1075	0.8528	8	741	0		1075	0.9975	135	1140	10
	1076	1.1617	73	870	0		1076	0.8683	1	742	0		1076	0.9603	96	1141	10
	1077	1.1572	47	871	0		1077	0.7546	8	743	0		1077	1.0171	100	1142	10
	1078	1.2021	28	872	0		1078	0.7609	41	744	0		1078	1.0244	144	1143	10
	1079	1.1891	88	873	0		1079	0.8476	50	745	0		1079	1.0167	131	1144	10
	1080	1.2701	76	874	0		1080	0.9408	71	746	0		1080	1.0197	151	1145	10
	1081	1.2019	85	875	0		1081	0.8319	86	747	0		1081	1.0579	124	1146	10
	1082	1.2019	23	876	0		1082	0.9536	116	748	0		1082	1.0769	161	1147	10
	1083	1.1449	62	877	0		1083	1.0553	146	749	0		1083	1.0756	98	1148	10
	1084	1.1605	42	878	0		1084	1.1716	88	750	0		1084	1.033	39	1149	10
	1085	1.1387	0	879	0		1085	1.2063	89	751	0		1085	1.0512	11	1150	10
	1086	1.0865	6	880	0		1086	1.2952	105	752	0		1086	0.9569	17	1151	10
	1087	1.046	28	881	0		1087	1.2669	90	753	0		1087	0.9315	0	1152	10
	1088	1.0128	43	882	0		1088	1.3561	134	754	0		1088	1.0078	102	1153	10
	1089	1.0518	72	883	0		1089	1.2473	113	755	0		1089	0.9807	132	1154	10
	1090	1.2362	63	884	0		1090	1.7052	101	756	0		1090	1.0036	123	1155	10
	1091	1.1924	56	885	0		1091	1.587	46	757	0		1091	0.9834	114	1156	10
	1092	1.1735	85	886	10		1092	1.2705	73	758	0		1092	1.0047	151	1157	10
	1093	1.193	128	887	10		1093	1.2327	52	759	0		1093	0.9712	119	1158	10
	1094	1.123	76	888	10		1094	1.4534	17	760	0		1094	0.9221	6	1159	10
	1095	1.1327	96	889	10		1095	1.4911	39	761	0		1095	0.9149	11	1160	10
	1096	1.1867	66	890	10		1096	1.4944	58	762	10		1096	0.9351	18	1161	10
	1097	1.1344	86	891	10		1097	1.4237	8	763	10		1097	0.9613	114	1162	10
	1098	1.1041	65	892	10		1098	1.3484	1	764	10		1098	0.9693	104	1163	10
	1099	1.2186	67	893	10		1099	1.2136	1	765	10		1099	0.9687	160	1164	10
	1100	1.2023	130	894	10		1100	1.1425	0	766	10		1100	0.9742	149	1165	10
	1101	1.2477	60	895	10		1101	0.9358	9	767	10		1101	0.9627	130
	1102	1.233	0	972	0		1102	0.9285	0	768	10		1102	0.948	64
	1103	1.1783	3	973	0		1103	0.9136	6	769	10		1103	0.9758	81
	1104	1.1108	2	974	10		1104	0.8865	3	770	10		1104	0.9718	140
	1105	1.0846	1	975	10		1105	0.8786	5	771	10		1105	0.9679	144
	1106	1.0537	51	976	10		1106	0.8397	0	772	10		1106	0.9688	119
	1107	1.0345	91	977	10		1107	0.7864	0	773	10		1107	0.9519	137
	1108	1.0627	32	978	10		1108	0.7401	19	817	0		1108	0.99	115
	1109	1.0109	76	979	10		1109	0.7825	3	818	0		1109	0.9666	101
	1110	1.1208	102	980	10		1110	0.7437	0	819	0		1110	0.991	123
	1111	1.1777	8	981	10		1111	0.7295	2	820	0		1111	0.9763	98
	1112	1.1116	16	982	10		1112	0.7306	1	821	0		1112	0.98	99
	1113	1.0884	105	983	10		1113	0.704	2	822	0		1113	1.0431	153
	1114	1.0816	48	1050	0		1114	0.7138	1	823	0		1114	1.0319	169
	1115	1.2468	59	1051	0		1115	0.7599	0	824	0		1115	1.0094	131
	1116	1.1956	92	1052	0		1116	0.7841	0	825	0		1116	0.9522	125
	1117	1.2032	87	1053	0		1117	0.7874	0	826	0		1117	0.9633	50
	1118	1.1508	98	1054	0		1118	0.7916	0	827	0		1118	0.9196	47
	1119	1.1061	63	1055	0		1119	0.7714	12	828	0		1119	0.903	1
	1120	1.1441	130	1056	0		1120	0.7255	88	829	0		1120	0.914	8
	1121	1.1931	120	1057	0		1121	0.8093	83	830	0		1121	0.9282	0
	1122	1.1823	65	1058	10		1122	1.0936	79	831	0		1122	0.9932	15
	1123	1.1574	113	1059	10		1123	1.125	91	832	0		1123	0.904	0
	1124	1.1357	80	1060	10		1124	1.0103	90	833	0		1124	0.9069	0
	1125	1.1019	137	1061	10		1125	1.1007	68	834	0		1125	0.9104	0
	1126	1.1868	88	1062	10		1126	1.3199	22	835	0		1126	0.9201	1
	1127	1.2388	66	1063	10		1127	1.2481	7	836	10		1127	0.9136	5
	1128	1.1521	102	1064	10		1128	1.1801	6	837	10		1128	0.9077	6
	1129	1.1042	65	1065	10		1129	1.2132	12	838	10		1129	0.9307	0
	1130	1.0848	73	1066	10		1130	1.0687	0	839	10		1130	0.9562	11
	1131	1.0733	70	1067	10		1131	1.0271	0	840	10		1131	0.9464	2
	1132	1.0901	59	1068	10		1132	1.0808	0	841	10		1132	0.96	19
	1133	1.0545	62	1069	10		1133	1.0825	0	842	10		1133	0.9287	14
	1134	1.1736	54	1070	10		1134	0.9863	0	843	10		1134	0.909	0
	1135	1.1398	106	1071	10		1135	0.9766	0	844	10		1135	0.8901	0
	1136	1.1148	77	1072	10		1136	0.9597	0	845	10		1136	0.9578	33
	1137	1.0834	103	1073	10		1137	0.9268	8	846	10		1137	0.9132	5
	1138	1.1087	54	1074	10		1138	0.9013	0	847	10		1138	0.9165	8
	1139	1.0979	38	1075	10		1139	0.9424	1	848	10		1139	0.9316	6
	1140	1.0821	127	1076	10		1140	0.86	3	849	10		1140	0.9479	1
	1141	1.0911	162	1077	10		1141	0.854	0	850	10		1141	0.9647	98
	1142	1.1245	164	1085	0		1142	0.8953	5	851	10		1142	0.9471	123
	1143	1.1044	135	1086	0		1143	0.8954	0	852	10		1143	0.9454	84
	1144	1.0871	127	1087	10		1144	0.8403	8	853	0		1144	0.9654	111
	1145	1.0771	90	1088	10		1145	0.8609	6	854	0		1145	0.9672	147
	1146	1.1303	36	1089	10		1146	0.8633	1	855	0		1146	1.0004	147
	1147	1.0721	99	1090	10		1147	0.8762	3	856	0		1147	1.0066	137
	1148	1.1007	80	1091	10		1148	0.8319	2	857	0		1148	1.044	137
	1149	1.055	115	1092	10		1149	0.8507	26	858	0		1149	1.0377	156
	1150	1.0083	80	1093	10		1150	0.8951	35	859	0		1150	1.0493	122
	1151	1.0075	91	1094	10		1151	0.9112	65	860	0		1151	1.0366	133
	1152	1.0251	101	1095	10		1152	0.7757	118	861	0		1152	1.0154	131
	1153	1.036	63	1096	10		1153	1.0782	81	862	0		1153	1.0359	143
	1154	1.0196	16	1097	10		1154	1.3201	102	863	0		1154	1.0312	148
	1155	0.9824	5	1098	10		1155	1.5866	128	864	0		1155	1.0361	111
	1156	0.9616	1	1099	10		1156	1.3758	90	865	0		1156	1.0523	150
	1157	0.9465	0	1100	10		1157	1.4217	71	866	0		1157	1.043	122
	1158	0.9169	0	1101	10		1158	1.6648	7	867	10		1158	0.9923	103
	1159	0.9112	34	1171	0		1159	1.5282	59	868	10		1159	1.018	113
	1160	0.9642	4	1172	0		1160	1.1928	48	869	10		1160	1.0112	105
	1161	0.9719	1	1173	10		1161	1.3302	41	870	10		1161	1.024	69
	1162	0.9356	19	1174	10		1162	1.5038	1	871	10		1162	0.9948	73
	1163	0.9526	5	1175	10		1163	1.3821	6	872	10		1163	1.0237	103
	1164	0.9369	0	1176	10		1164	1.2724	9	873	10		1164	0.9852	49
	1165	0.9345	1	1177	10		1165	1.1688	1	874	10		1165	1.0035	51
	1166	0.9295	5	1178	10		1166	1.1186	1	875	10		1166	1.0049	6
	1167	0.9274	48	1179	10		1167	1.0145	0	876	10		1167	0.9614	23
	1168	0.907	41	1180	10		1168	0.9636	0	877	10		1168	0.9797	10
	1169	0.9851	51	1181	10		1169	0.9166	0	878	10		1169	0.9663	17
	1170	1.1351	41	1182	10		1170	0.8791	3	895	0		1170	0.9479	24
	1171	1.1246	3	1183	10		1171	0.8633	1	896	0		1171	0.9679	23
	1172	1.0655	9	1184	10		1172	0.8483	2	897	0		1172	0.9551	48
	1173	0.9785	39	1185	10		1173	0.8152	0	898	0		1173	0.95	39
	1174	1.0159	83	1186	10		1174	0.7827	0	899	0		1174	1.0184	115
	1175	1.044	68	1187	10		1175	0.7666	4	900	0		1175	1.0241	146
	1176	1.0566	75	1188	10		1176	0.7398	43	901	0		1176	1.0245	144
	1177	1.0475	39	1189	10		1177	0.7922	50	902	0		1177	1.0189	138
	1178	1.0472	59	1190	10		1178	0.8895	44	903	0		1178	1.048	118
	1179	1.0283	88	1191	10		1179	0.9019	0	904	10		1179	1.0602	135
	1180	1.07	72	1192	10		1180	0.8556	0	905	10		1180	1.0723	150
	1181	1.0844	117	1193	10		1181	0.8546	0	906	10		1181	1.0516	153
	1182	1.0655	59	1194	10		1182	0.8781	0	907	10		1182	1.0641	149
	1183	1.0244	121	1195	10		1183	0.8761	0	908	10		1183	1.0643	151
	1184	1.0073	120				1184	0.874	1	909	10		1184	1.0592	150
	1185	1.0297	138				1185	0.8213	8	910	10		1185	1.047	166
	1186	1.0499	140				1186	0.8301	0	911	10		1186	1.0279	143
	1187	1.0867	114				1187	0.858	1	912	10		1187	1.0389	145
	1188	1.0594	90				1188	0.8637	1	913	10		1188	1.0162	151
	1189	1.0345	100				1189	0.8824	2	914	10		1189	1.0277	89
	1190	1.0362	139				1190	0.8709	8	915	10		1190	1.0233	115
	1191	1.0137	144				1191	0.9733	7	916	10		1191	1.0284	92
	1192	0.9836	148				1192	0.8655	46	940	0		1192	1.008	134
	1193	1.0149	103				1193	0.9374	14	941	0		1193	1.0261	114
	1194	1.0035	123				1194	1.0781	31	942	0		1194	0.9962	110
	1195	0.9918	120				1195	1.3815	94	943	0		1195	1.008	110
	1196	1.0009	5				1196	1.5848	30	944	0		1196	0.9803	60
	1197	0.9555	3				1197	1.3824	87	945	0		1197	1.024	132
	1198	0.9691	3				1198	1.4738	67	946	10		1198	0.9984	117
										947	10
										948	10
										949	10
										950	10
										951	10
										952	10
										953	10
										954	10
										955	10
										956	10
										957	10
										958	10
										959	10
										960	10
										961	10
										962	0
										963	0
										964	0
										965	0
										966	0
										967	10
										968	10
										969	10
										970	10
										971	10
										972	10
										973	10
										974	10
										975	10
										976	10
										977	10
										978	10
										979	0
										980	0
										981	10
										982	10
										983	10
										984	10
										985	10
										986	10
										987	10
										988	10
										989	0
										990	0
										991	0
										992	0
										993	0
										994	0
										995	0
										996	0
										997	0
										998	10
										999	10
										1000	10
										1001	10
										1002	10
										1003	10
										1004	10
										1005	10
										1006	10
										1007	10
										1008	10
										1009	10
										1010	10
										1011	10
										1012	10
										1018	0
										1019	0
										1020	0
										1021	0
										1022	0
										1023	0
										1024	0
										1025	0
										1026	0
										1027	0
										1028	0
										1029	0
										1030	10
										1031	10
										1032	10
										1033	10
										1034	10
										1035	10
										1036	10
										1037	10
										1038	10
										1039	10
										1040	10
										1041	10
										1042	10
										1043	10
										1044	10
										1045	0
										1046	0
										1047	0
										1048	0
										1049	0
										1050	0
										1051	0
										1052	0
										1053	0
										1054	0
										1055	0
										1056	0
										1057	0
										1058	0
										1059	0
										1060	0
										1061	0
										1062	0
										1063	0
										1064	0
										1065	0
										1066	0
										1067	0
										1068	0
										1069	0
										1070	0
										1071	0
										1072	0
										1073	0
										1074	0
										1075	0
										1076	0
										1077	10
										1078	10
										1079	10
										1080	10
										1081	10
										1082	10
										1083	10
										1084	10
										1085	10
										1086	10
										1087	10
										1088	10
										1089	10
										1090	10
										1091	10
										1092	10
										1093	10
										1097	0
										1098	0
										1099	0
										1100	0
										1101	0
										1102	0
										1103	0
										1104	0
										1105	0
										1106	0
										1107	0
										1108	0
										1109	0
										1110	0
										1111	0
										1112	0
										1113	0
										1114	0
										1115	0
										1116	0
										1117	0
										1118	0
										1119	10
										1120	10
										1121	10
										1122	10
										1123	10
										1124	10
										1125	10
										1126	0
										1127	0
										1128	0
										1129	0
										1130	0
										1131	0
										1132	0
										1133	0
										1134	0
										1135	0
										1136	0
										1137	0
										1138	0
										1139	0
										1140	0
										1141	0
										1142	0
										1143	0
										1144	0
										1145	0
										1146	0
										1147	0
										1148	0
										1149	0
										1150	10
										1151	10
										1152	10
										1153	10
										1154	10
										1155	10
										1156	10
										1157	10

## Sheet: Suppl.Fig.5B
	PER2Luc (n=5)				CAG-Luc (n=4)				Pkg1-Luc (n=6)
	time [3min values]	photons [%]			time [3min values]	photons [%]			time [3min values]	photons [%]
	[min from transition]	Mean	S.E.M.		[min from transition]	Mean	S.E.M.		[min from transition]	Mean	S.E.M.
	-13.5	110.549	4.595		-13.5	112.544	5.8746		-13.5	99.5613	0.386
	-10.5	108.338	4.5566		-10.5	112.717	5.7363		-10.5	99.0041	0.3645
	-7.5	106.461	4.4892		-7.5	112.745	5.5467		-7.5	99.1582	0.3435
	-4.5	105.157	4.4892		-4.5	108.281	5.5467		-4.5	98.7309	0.3435
	-1.5	102.174	4.4892		-1.5	101.736	5.5467		-1.5	99.1778	0.3435
	1.5	97.8263	4.4892		1.5	98.2646	5.5467		1.5	100.822	0.3435
	4.5	98.2175	4.4892		4.5	109.083	5.5467		4.5	101.01	0.3435
	7.5	102.375	4.4892		7.5	119.878	5.5467		7.5	100.904	0.3435
	10.5	109.232	4.4892		10.5	129.864	5.5467		10.5	101.146	0.3435
	13.5	117.933	4.4892		13.5	142.496	5.5467		13.5	101.366	0.3435
	16.5	124.355	4.6195		16.5	144.113	5.8355		16.5	101.661	0.3678
	19.5	125.715	4.7265		19.5	144.437	6.188		19.5	101.853	0.4267
	22.5	127.279	4.8401		22.5	146.174	6.5503		22.5	102.262	0.4727
