# Supplementary material for: The sleep-wake distribution contributes to the peripheral rhythms in PERIOD-2
Source: eLife. 2021 Dec 13;10:e69773. doi: 10.7554/eLife.69773 (PMC8798053; doi:10.7554/eLife.69773)
Supplement: Figure 1—figure supplement 6—source data 1. [file elife-69773-fig1-figsupp6-data1.xlsx]

## Sheet: A
A3649				A3650
Time [hrs]	Temperature [C]	Photons		Time [hrs]	Temperature [C]	Photons
0.5	35.2886	3269.48		0.5	35.2795	3242.32
1.5	36.0466	3723.15		1.5	35.2638	3923.28
2.5	36.2336	4050.12		2.5	36.365	3800.2
3.5	36.7317	4445.87		3.5	36.578	3846.63
4.5	36.9499	4858.98		4.5	36.6042	4344.63
5.5	36.846	5195.97		5.5	36.8741	4200.47
6.5	37.0795	5593.58		6.5	36.4844	4966.52
7.5	36.9603	5381.45		7.5	36.4638	4815.58
8.5	36.9343	5935.33		8.5	36.2144	5749.63
9.5	36.7734	5863.58		9.5	36.2146	6262.37
10.5	36.5295	6476.72		10.5	36.173	6402.98
11.5	36.4153	6180.98		11.5	36.095	6681.87
12.5	35.8806	6882.13		12.5	35.7002	6987.83
13.5	35.8182	7655.2		13.5	35.4039	7286.1
14.5	34.6187	7303.9		14.5	34.765	7029.52
15.5	35.0707	7396.07		15.5	35.009	6433.67
16.5	35.3511	7312.12		16.5	34.2973	5937.25
17.5	34.9771	6158.57		17.5	34.8326	6280.32
18.5	35.1277	6368.27		18.5	34.6662	4680.55
19.5	35.0292	5001.57		19.5	34.7858	4530.67
20.5	35.5172	4482.97		20.5	35.2377	4135.03
21.5	35.2056	3565.42		21.5	34.6818	3961.07
22.5	35.5275	3600.7		22.5	34.8324	3588.08
23.5	35.1589	3182.25		23.5	35.1338	3324.2
24.5	35.164	3469.88		24.5	35.0974	3380.27
25.5	34.8368	3950.93		25.5	35.4978	3399.02
26.5	35.5483	4316.7		26.5	36.3391	3511.02
27.5	36.7837	3935.25		27.5	36.3859	3855.15
28.5	37.0017	4175.4		28.5	36.6353	4424.83
29.5	36.2542	4879.52		29.5	36.6301	4798.12
30.5	36.5037	5551.82		30.5	36.2717	4834.9
31.5	36.4619	6561.18		31.5	36.4639	5169.77
32.5	36.3165	6192.65		32.5	36.2507	5483.3
33.5	36.0728	7138.87		33.5	36.2042	6563.25
34.5	35.003	7265.37		34.5	36.2301	5517.85
35.5	36.0622	8411.55		35.5	36.121	5907.62
36.5	34.9874	7472.52		36.5	36.1262	6074.95
37.5	35.5222	8446.48		37.5	35.8302	5565.58
38.5	35.0913	7890.13		38.5	34.5155	6044.52
39.5	34.9979	8717.17		39.5	34.5362	6851.2
40.5	35.5899	7063.92		40.5	34.7026	6127.83
41.5	35.1174	5420.98		41.5	34.8793	5497.77
42.5	35.3927	5103.68		42.5	34.7597	4722.97
43.5	35.4859	4215.13		43.5	34.6766	4285.55
44.5	35.2109	4227.65		44.5	34.8169	4461.93
45.5	35.595	3537.63		45.5	34.8585	3732.53
46.5	35.3924	3218.5		46.5	35.1805	4052.8
47.5	35.3977	3108.67		47.5	35.0508	3553.07
48.5	35.6055	3308.12		48.5	35.0766	3664.93
49.5	35.3873	3317.2		49.5	35.7209	3804.78
50.5	35.9949	3908.47		50.5	36.2353	3888.42
51.5	36.4362	4084.02		51.5	36.5365	3859.68
52.5	36.8668	4300.75		52.5	36.7599	3812
53.5	36.9498	4670.6		53.5	36.9832	3841.83
54.5	37.007	5397.25		54.5	36.521	4151.03
55.5	36.6643	5622.72		55.5	36.4586	4363.67
56.5	36.4308	6200.25		56.5	36.4898	5083.65
57.5	36.4206	6321.28		57.5	36.3963	4972.97
58.5	36.6125	6725.4		58.5	36.2924	5126.6
59.5	35.948	7076.52		59.5	36.2561	5241.95
60.5	35.7717	7750.03		60.5	36.2768	5374.15
61.5	36.2232	6782.73		61.5	35.5547	5118.32
62.5	35.5432	4868.12		62.5	35.0613	6321.58
63.5	34.8681	6799.95		63.5	34.8845	6513.58
64.5	35.2161	6317.78		64.5	34.8897	5489.28
65.5	34.889	6121.4		65.5	34.9625	5875.35
66.5	35.2418	5390.82		66.5	35.1704	5081.85
67.5	35.4238	4715.97		67.5	34.8323	4612.57
68.5	35.0706	4514.2		68.5	35.035	4638.73
69.5	35.1641	4173.75		69.5	35.0662	4499.87
70.5	35.1018	3806.53		70.5	35.0456	3806.03
71.5	34.8942	3541.88		71.5	34.6609	3567.48
72.5	35.5067	3342.25		72.5	34.9519	3657.07
73.5	35.6108	3376.07		73.5	35.9235	3594.52
74.5	36.3426	3739.32		74.5	35.8404	3777.67
75.5	36.7474	3905.58		75.5	35.9393	3975.35
76.5	36.9395	4241.37		76.5	36.1938	4041.95
77.5	37.142	4499.68		77.5	36.1054	4412.77
78.5	37.0953	4784.37		78.5	36.1417	4762.95
79.5	36.872	4922.9		79.5	35.7782	4950.72
80.5	36.8201	5880.83		80.5	35.7728	5533.17
81.5	36.1299	6190.92		81.5	35.6535	5592.32
82.5	36.2491	6991.07		82.5	35.7313	5420.47
83.5	35.0654	6421.87		83.5	35.9288	5310.35
84.5	35.8597	8246.25		84.5	35.4611	5123.23
85.5	35.3407	8463.15		85.5	35.96	5075.2
86.5	34.9097	7553		86.5	35.1338	5244.53
87.5	35.4393	8212.68		87.5	35.0091	5583.03
88.5	34.6631	6648.5		88.5	35.3339	5226.62

## Sheet: B
Output phase shift						3.14159
	if difference is 3.14 - equals 6 circ hrs					6
	peak time temperature (radians)	peak time photons(radian)	difference (radians)	difference [hrs]	Temp peak	in Hrs
A3649	-0.26	-1.67	1.93	3.68603	14.314	14:20:00
A3650	-0.15	-1.7	1.85	3.53324	14.4668	14:28:00
renal PER2 bioluminescence peak is set at ZT18
