# Supplementary material for: The sleep-wake distribution contributes to the peripheral rhythms in PERIOD-2
Source: eLife. 2021 Dec 13;10:e69773. doi: 10.7554/eLife.69773 (PMC8798053; doi:10.7554/eLife.69773)
Supplement: Figure 1—figure supplement 7—source data 1. [file elife-69773-fig1-figsupp7-data1.xlsx]

## Sheet: A
	Activity					Wakeing
	A7841	A8424	A8425	A9521	A9522	A7841	A8424	A8425	A9521	A9522
12.5	0.566667	1.00778	0.951111	0.588889	1.45556	0.56	0.686667	0.601111	0.446667	0.647778
13.5	0.35	1.35889	1.16333	0.958889	2.34889	0.431111	0.824444	0.801111	0.582222	0.872222
14.5	0.762222	0.73	0.897778	1.30333	1.92556	0.624444	0.685556	0.631111	0.612222	0.708889
15.5	0.993333	1.30889	0.826667	1.69222	3.01222	0.63	0.791111	0.534444	0.747778	0.991111
16.5	1.00778	0.858889	1.50111	0.963333	2.14667	0.735556	0.653333	0.791111	0.441111	0.751111
17.5	0.274444	1.21778	0.756667	1.26778	1.48444	0.446667	0.724444	0.545556	0.58	0.623333
18.5	0.307778	1.35222	0.785556	1.61667	2.73778	0.391111	0.742222	0.435556	0.736667	0.98
19.5	0.453333	0.83	1.87333	0.711111	1.38778	0.488889	0.692222	0.81	0.324444	0.563333
20.5	0.593333	0.525556	0.346667	1.50333	1.10333	0.42	0.517778	0.232222	0.611111	0.643333
21.5	0.432222	0.407778	1.53333	0.147778	0.857778	0.543333	0.393333	0.733333	0.195556	0.488889
22.5	0.545556	0.221111	0.596667	1.12667	1.80444	0.504444	0.347778	0.276667	0.576667	0.774444
23.5	1.12556	0.498889	1.24889	0.938889	1.02444	0.723333	0.527778	0.678889	0.492222	0.448889
24.5	0.641111	0.534444	1.97	0.155556	1.26556	0.457778	0.531111	0.885556	0.164444	0.578889
25.5	0.004444	0.402222	0.213333	1.34667	0.298889	0.194444	0.372222	0.176667	0.661111	0.248889
26.5	0.833333	0.18	1.03667	0.134444	0.712222	0.753333	0.357778	0.744444	0.152222	0.44
27.5	0.068889	0.236667	0.04	0.825556	1.56778	0.148889	0.321111	0.152222	0.454444	0.734444
28.5	0.06	0.053333	0.021111	0.97	0.274444	0.191111	0.196667	0.173333	0.483333	0.238889
29.5	0.891111	0.638889	0.114444	0.336667	1.26889	0.703333	0.548889	0.312222	0.264444	0.595556
30.5	0.167778	0.158889	0.436667	0.806667	0.508889	0.267778	0.336667	0.475556	0.461111	0.467778
31.5	0.258889	0.305556	0.404444	0.253333	0.172222	0.268889	0.402222	0.307778	0.253333	0.225556
32.5	0.182222	0.42	0.611111	1.01	0.625556	0.263333	0.405556	0.483333	0.487778	0.514444
33.5	0.674444	0.368889	0.291111	0.676667	0.647778	0.562222	0.487778	0.262222	0.374444	0.495556
34.5	0.12	0.14	0.301111	0.997778	0.146667	0.238889	0.304444	0.372222	0.513333	0.342222
35.5	0.584444	0.63	0.483333	0.65	1.44444	0.457778	0.57	0.453333	0.33	0.657778
36.5	0.958889	0.864444	0.898889	1.46444	1.61667	0.581111	0.695556	0.627778	0.688889	0.765556
37.5	0.903333	1.13889	0.841111	1.07778	1.06778	0.687778	0.752222	0.655556	0.635556	0.736667
38.5	1.08667	1.42333	1.35222	1.78889	1.29222	0.708889	0.803333	0.686667	0.72	0.745556
39.5	1.45333	1.52333	1.54111	1.95333	2.07444	0.737778	0.813333	0.776667	0.774444	0.747778
40.5	1.71	2.38667	1.14444	1.73778	3.01222	0.767778	0.995556	0.637778	0.713333	0.992222
41.5	1.02556	1.00444	1.54111	0.891111	2.26222	0.577778	0.705556	0.734444	0.466667	0.886667
42.5	1.81444	1.35333	1.49333	1.40778	1.30889	0.775556	0.766667	0.674444	0.6	0.48
43.5	0.764444	0.918889	1.03444	1.22	2.49778	0.495556	0.606667	0.677778	0.552222	0.903333
44.5	0.393333	0.851111	0.362222	0.854444	0.763333	0.282222	0.511111	0.423333	0.41	0.336667
45.5	1.01444	0.725556	1.40667	1.09889	2.01778	0.654444	0.507778	0.801111	0.581111	0.762222
46.5	0.823333	0.79	0.823333	0.872222	0.987778	0.604444	0.566667	0.513333	0.45	0.395556
47.5	1.51778	0.544444	1.14556	1.04333	1.77556	0.846667	0.43	0.674444	0.485556	0.658889
48.5	0.043333	1.44889	0.49	0.403333	0.813333	0.211111	0.601111	0.351111	0.331111	0.385556
49.5	0.102222	0.328889	0.117778	0.38	1.24222	0.245556	0.36	0.164444	0.385556	0.525556
50.5	0.143333	0.273333	1.45333	0.468889	0.84	0.307778	0.304444	0.816667	0.348889	0.432222
51.5	0.027778	0.114444	0.285556	0.505556	0.551111	0.235556	0.227778	0.293333	0.353333	0.362222
52.5	0.046667	0.822222	0.312222	0.323333	0.793333	0.245556	0.63	0.281111	0.25	0.412222
53.5	0.018889	0.312222	0.355556	0.653333	1.08778	0.237778	0.355556	0.328889	0.425556	0.545556
54.5	0.084444	0.763333	0.046667	0.538889	1.19444	0.337778	0.603333	0.246667	0.293333	0.515556
55.5	0.901111	0.455556	0.727778	0.515556	0.687778	0.743333	0.338889	0.53	0.366667	0.337778
56.5	0.098889	0.442222	0.266667	0.446667	1.07556	0.38	0.426667	0.247778	0.277778	0.496667
57.5	0.058889	0.403333	0.664444	0.877778	1.25	0.296667	0.377778	0.383333	0.567778	0.566667
58.5	0.301111	0.13	0.623333	0.605556	0.736667	0.512222	0.178889	0.352222	0.436667	0.368889
59.5	0.093333	0.498889	0.973333	0.554444	1.34333	0.364444	0.436667	0.525556	0.444444	0.64
60.5	0.713333	0.837778	1.23111	1.08111	1.98889	0.63	0.651111	0.665556	0.642222	0.887778
61.5	1.49778	1.02111	1.54778	1.30667	1.90222	0.816667	0.674444	0.747778	0.693333	0.735556
62.5	0.754444	1.26111	1.75889	1.75667	2.51889	0.626667	0.773333	0.778889	0.736667	0.848889
63.5	1.72222	1.42111	0.897778	1.25778	3.02111	0.892222	0.838889	0.534444	0.704444	0.978889
64.5	0.778889	1.47222	1.83111	1.54667	2.37222	0.544444	0.811111	0.751111	0.657778	0.845556
65.5	1.00778	1.27667	1.36556	1.70889	2.40556	0.633333	0.765556	0.744444	0.826667	0.855556
66.5	1.28	2.00778	1.60778	0.564444	1.88444	0.714444	0.86	0.673333	0.368889	0.717778
67.5	0.598889	0.862222	1.47778	1.19889	1.08	0.496667	0.605556	0.758889	0.602222	0.442222
68.5	0.728889	0.946667	0.837778	0.742222	2.51111	0.513333	0.563333	0.583333	0.525556	0.866667
69.5	1.26556	0.725556	0.433333	0.496667	0.634444	0.684444	0.456667	0.425556	0.411111	0.313333
70.5	0.44	0.995556	0.998889	0.854444	2.37778	0.294444	0.588889	0.62	0.471111	0.873333
71.5	1.31667	0.91	1.28333	0.927778	1.66333	0.81	0.556667	0.747778	0.537778	0.656667
72.5	0.106667	0.122222	0.107778	0.015556	0.041111	0.993333	1	1	1	1
73.5	0.004444	0.005556	0	0	0.001111	1	1	1	1	1
74.5	0	0.012222	0	0.005556	0	1	1	0.966667	1	1
75.5	0	0	0	0.003333	0.011111	0.981111	1	0.954444	1	1
76.5	0	0	0	0.095556	0.133333	0.992222	1	0.991111	0.976667	0.996667
77.5	0.038889	0	0	0.014444	0.037778	0.995556	0.998889	0.974444	0.941111	1
78.5	0.897778	0.524444	0.171111	0.553333	0.836667	0.414444	0.245556	0.26	0.238889	0.293333
79.5	0.136667	0.234444	0.004444	0.134444	0.488889	0.146667	0.22	0.154444	0.156667	0.322222
80.5	0.252222	0.322222	0.098889	0.374444	0.025556	0.193333	0.292222	0.376667	0.262222	0.107778
81.5	0.403333	0.281111	0.004444	0.595556	0.552222	0.294444	0.25	0.154444	0.333333	0.377778
82.5	0.143333	0.107778	0.041111	0.787778	0.621111	0.206667	0.213333	0.326667	0.462222	0.441111
83.5	0.181111	0.364444	0.347778	0.378889	0.397778	0.372222	0.311111	0.437778	0.306667	0.325556
84.5	0.328889	0.66	0.393333	0.971111	1.29556	0.442222	0.467778	0.467778	0.635556	0.63
85.5	1.24111	0.786667	1.01667	1.04222	1.47222	0.75	0.555556	0.684444	0.624444	0.651111
86.5	0.343333	0.843333	1.23111	1.83333	1.43667	0.376667	0.585556	0.633333	0.783333	0.582222
87.5	0.913333	0.758889	1.36556	1.36444	2.42222	0.601111	0.501111	0.741111	0.68	0.862222
88.5	1.27111	0.591111	1.07889	1.61111	1.88667	0.607778	0.536667	0.645556	0.7	0.778889
89.5	0.67	0.86	0.624444	0.71	1.17667	0.448889	0.548889	0.667778	0.428889	0.485556
90.5	0.931111	1.42111	0.842222	1.66333	2.68667	0.58	0.717778	0.562222	0.832222	0.967778
91.5	1.65667	0.385556	1.03667	1.00444	0.508889	0.687778	0.348889	0.65	0.514444	0.266667
92.5	0.084444	0.085556	0.156667	0.671111	1.21667	0.146667	0.156667	0.36	0.413333	0.565556
93.5	0.678889	0.538889	0.113333	1.08111	3.07889	0.504444	0.432222	0.271111	0.593333	1
94.5	0.316667	1.19889	0.094444	0.185556	3.02111	0.293333	0.677778	0.283333	0.231111	0.996667
95.5	1.41333	0.69	1.40778	0.832222	0.88	0.616667	0.438889	0.9	0.54	0.42
96.5	1.36333	1.66333	0.152222	0.878889	2.32889	0.605556	0.793333	0.173333	0.591111	0.838889
97.5	1.54556	1.19444	1.59222	0.314444	0.138889	0.733333	0.541111	0.91	0.273333	0.186667
98.5	0.354444	0.218889	0.052222	0.614444	1.69556	0.263333	0.247778	0.136667	0.535556	0.64
99.5	0.106667	1.54889	0.042222	0.122222	0.136667	0.2	0.795556	0.327778	0.194444	0.197778
100.5	2.06444	0.394444	0.387778	0.943333	1.52778	0.968889	0.305556	0.295556	0.462222	0.627778
101.5	0.083333	0.035556	0.455556	0.44	0.424444	0.182222	0.205556	0.318889	0.382222	0.3
102.5	0.524444	0.226667	0.701111	0.866667	1.08	0.306667	0.356667	0.404444	0.625556	0.493333
103.5	1.64111	0.388889	0.292222	0.54	0.666667	0.705556	0.44	0.273333	0.437778	0.367778
104.5	0.086667	0.456667	0.714444	0.44	0.687778	0.135556	0.331111	0.422222	0.317778	0.328889
105.5	0.654444	0.705556	0.08	0.705556	0.154444	0.47	0.6	0.145556	0.492222	0.197778
106.5	0.043333	0.335556	0.291111	0.641111	1.69	0.162222	0.351111	0.396667	0.407778	0.733333
107.5	0.233333	0.28	0.44	0.662222	0.224444	0.36	0.312222	0.491111	0.397778	0.244444
108.5	0.392222	0.591111	0.953333	1.20333	2.16	0.483333	0.606667	0.614444	0.578889	0.791111
109.5	0.934444	1.31556	1.19778	0.958889	2.78333	0.694444	0.763333	0.713333	0.628889	1
110.5	0.805556	1.09889	0.456667	1.11444	2.70778	0.696667	0.752222	0.492222	0.624444	1
111.5	1.37333	0.866667	0.73	2.14111	1.42444	0.814444	0.654444	0.562222	0.88	0.766667
112.5	1.40333	1.78667	1.14889	1.16333	2.43778	0.725556	0.856667	0.666667	0.591111	0.944444
113.5	1.34778	1.08556	1.26667	1.95889	0.893333	0.653333	0.634444	0.71	0.806667	0.395556
114.5	1.67556	2.27778	0.715556	0.396667	2.19333	0.766667	0.882222	0.475556	0.242222	0.8
115.5	1.11556	0.43	1.76556	1.93	3.16889	0.618889	0.391111	0.732222	0.783333	1
116.5	1.32556	0.505556	0.576667	0.476667	2.92333	0.73	0.364444	0.39	0.291111	1
117.5	0.515556	0.553333	0.478889	0.878889	1.28	0.366667	0.45	0.252222	0.471111	0.453333
118.5	0.581111	1.40778	0.385556	1.38	1.09444	0.566667	0.7	0.253333	0.651111	0.398889
119.5	0.891111	0.742222	1.15333	0.591111	2.78556	0.738889	0.457778	0.592222	0.42	0.951111

## Sheet: B
LMA [counts/hr]	wakeing [min/hour]
109.875	33.3167
96.75	30.1833
31.75	17.3583
66.875	29.1583
46.875	21.9417
35.5	22.1583
14.375	14.1
65.375	28.0083
43.375	20.5417
36.375	22.4167
54.125	29.4333
74.25	37.4583
118.625	43.0333
124.25	45.4917
90.625	36.8667
77.875	38.7917
103.375	42.175
84.5	38.65
83	41.1167
93.25	39.5583
74.125	36.8417
107	43.8667
149.75	45.6917
141.25	36.1167
80.625	25.8917
66.375	24.1583
84.5	26.775
54.125	21.6333
23	17.325
73.75	27.875
18.125	15.9583
25	18.6583
25.375	22.075
26.375	23.1667
68.25	30.225
64	35.175
108.375	43.3667
88.625	42.075
72.125	35.5333
95.875	40.7917
97.75	39.4167
66.875	33.65
126.125	43.55
71.75	31.8583
149.875	42.6917
119	40.3917
155.5	40.175
115.625	32.5
176.25	59.1667
137.125	53.9583
61.25	25.8583
67.625	22.8667
158.375	54.675
304.625	57.0583
20.75	11.9917
42.5	26.1667
183	49.8417
252.375	55.8417
63.75	22.9583
79.875	28.5
181.875	55.55
214.125	56.5917
119.5	40.9417
113.75	38.1833
150	55.2417
193.375	56.3333
77.25	32.5
51.75	26.425
159.625	57.85
275	56.1917
97	31.9083
27.625	27.3
168	50.525
207	51.75
70.75	25.7167
45	21.1083
167.5	49.3333
229.125	51.8667
32.125	17.1583
10.875	9.59167
137.5	50.9833
160.75	48.6417
34.125	25.1
80.875	34.55
166.375	53.025
202.625	56.45
123.125	42.55
88.125	37.4917
153.25	54.1917
239.75	56.1083
82.375	35.6667
51.75	28.9333
139.375	53.95
229.625	55
64.5	28.9083
39.25	21.5833
47.75	26.15
52.625	25.8
45.5	23.5833
12.375	12.5333
64	31.3333
24.625	13.525
41.25	25.2
13.875	15.825
29.5	22.35
28.25	24.2167
53	37.0333
72	35.725
104.375	45.6583
93.5	37.6167
96.75	46.5083
77.625	40.1583
111.5	42.3667
82.375	36.975
156.125	46.7167
80.5	28.3333
102.625	40.4583
110.625	35.6583
88.375	31.7167
54.125	24.5583
82.625	33.3833
45	21.4417
44	24.925
53	27.9417
30.375	20.675
30.125	23.0417
23.375	17.6583
30.875	22.2083
23.25	22.3917
36.125	28.1833
56.875	36.25
88.5	41.3
92	43.3083
96.375	43.9333
60	36.9083
89	42.9833
128.625	41.8667
111.625	41.0917
115.875	42.3167
101.875	34.75
144.375	43.8917
150	38.625
97.625	29.5833
130.875	34.8417
