# Supplementary material for: The sleep-wake distribution contributes to the peripheral rhythms in PERIOD-2
Source: eLife. 2021 Dec 13;10:e69773. doi: 10.7554/eLife.69773 (PMC8798053; doi:10.7554/eLife.69773)
Supplement: Figure 1—source data 1. [file elife-69773-fig1-data1.xlsx]

## Sheet: Fig1A_left
Peripheral SD response				Central SD response
mouseID	BSL	REC		mouseID	BSL	REC
1MS114	0.565329	0.546632		A7841	0.88385	1.13873
2MP82	0.806812	1.12222		A8424	0.896071	1.34617
3MP53	0.794159	0.864324		A8425	0.842228	1.21274
3MP71	0.830587	0.830627		A9521	0.954966	1.09693
3MS113	0.517896	0.596177		A9522	0.767526	0.907245

## Sheet: Fig1A_right
Periphery		BSL (repeated 3 times)					Recover from SD									Central	BSL					REC
	Time	1MS114	2MP82	3MP53	3MP71	3MS113	1MS114	2MP82	3MP53	3MP71	3MS113						A7841	A8424	A8425	A9521	A9522	A7841	A8424	A8425	A9521	A9522		A7841	A8424	A8425	A9521	A9522
	0.5	1.55573	0.921128	0.979586	1.07654	0.986571										0.5	1.13529	0.989886	0.888774	0.908959	0.870169
	1.5	1.33849	1.03059	0.961786	1.12219	0.804941										1.5	1.02931	0.984216	0.852407	0.92328	0.652461
	2.5	0.883083	0.938657	0.8929	1.00495	0.586787										2.5	1.0193	0.952803	0.871735	0.898675	0.72792
	3.5	1.12232	0.837992	0.878858	0.917531	0.644282										3.5	0.983952	0.91631	0.866167	0.896417	0.656113
	4.5	0.738093	0.840609	0.860539	0.860672	0.529406										4.5	0.925443	0.891961	0.856025	0.92146	0.741401
	5.5	0.702457	0.846089	0.812949	0.876219	0.570039										5.5	0.914132	0.895251	0.850788	0.932271	0.683925
	6.5	0.698208	0.820037	0.800247	0.797909	0.57127										6.5	0.893505	0.891127	0.848158	0.962726	0.769959
	7.5	0.682169	0.875851	0.7825	0.765411	0.513721										7.5	0.964747	0.882132	0.891572	0.911234	0.669928
	8.5	0.663504	0.8649	0.811376	0.801936	0.567074										8.5	0.883898	0.875964	0.901234	0.948499	0.677268
	9.5	0.635237	0.852047	0.834719	0.788111	0.695989										9.5	0.872322	0.85177	0.875149	0.956345	0.691976
	10.5	0.73135	0.886707	0.863421	0.800048	0.662308										10.5	0.904606	0.847075	0.843193	0.94251	0.758333
	11.5	0.905152	0.971603	0.934388	0.871013	0.668466										11.5	0.873518	0.849793	0.870543	0.986652	0.884736
	12.5	0.949719	1.0017	0.942595	0.955344	0.747766										12.5	0.997247	0.887873	1.05669	1.201	1.05262
	13.5	0.938275	1.05504	0.989226	1.00793	0.962115										13.5	1.13225	1.06053	1.09157	1.37113	1.35374
	14.5	1.06365	1.06258	1.02295	1.06415	0.961232										14.5	1.06609	1.17003	1.05445	1.34104	1.4322
	15.5	1.03832	1.11803	1.0097	1.09676	1.03638										15.5	1.13648	1.23493	1.06587	1.19096	1.52711
	16.5	1.07331	1.1493	1.05326	1.06815	1.00127										16.5	1.11632	1.29123	1.07881	1.21724	1.57173
	17.5	1.30252	1.12371	1.11153	1.14956	1.16181										17.5	1.03872	1.19227	1.14031	1.02233	1.39893
	18.5	1.21381	1.26231	1.0629	1.0639	1.14741										18.5	1.14212	1.23595	1.11162	0.973267	1.16975
	19.5	1.64297	1.24791	1.12396	1.2245	1.12119										19.5	1.00952	1.14741	1.13963	1.14855	1.16047
	20.5	1.29958	1.10854	1.07645	1.10147	1.28346										20.5	1.07039	1.10583	1.02205	1.0114	1.06591
	21.5	1.10537	1.22676	1.10448	1.05044	1.16123										21.5	0.98146	1.07484	1.07842	1.12721	1.00484
	22.5	1.01648	1.10931	1.07322	1.09439	1.05379										22.5	0.995403	1.08705	0.980575	0.939481	0.984
	23.5	0.86519	0.950351	1.03916	1.05149	1.02458										23.5	0.958617	1.06505	0.957266	0.91552	1.08108
	24.5	1.55573	0.921128	0.979586	1.07654	0.986571										24.5	1.13529	0.989886	0.888774	0.908959	0.870169
	25.5	1.33849	1.03059	0.961786	1.12219	0.804941										25.5	1.02931	0.984216	0.852407	0.92328	0.652461
	26.5	0.883083	0.938657	0.8929	1.00495	0.586787										26.5	1.0193	0.952803	0.871735	0.898675	0.72792
	27.5	1.12232	0.837992	0.878858	0.917531	0.644282										27.5	0.983952	0.91631	0.866167	0.896417	0.656113
	28.5	0.738093	0.840609	0.860539	0.860672	0.529406										28.5	0.925443	0.891961	0.856025	0.92146	0.741401
	29.5	0.702457	0.846089	0.812949	0.876219	0.570039										29.5	0.914132	0.895251	0.850788	0.932271	0.683925
	30.5	0.698208	0.820037	0.800247	0.797909	0.57127	0.514557	1.04139	0.850021	0.796037	0.583094					30.5	0.893505	0.891127	0.848158	0.962726	0.769959	1.05732	1.17814	1.14569	0.978399	0.853441		1.5
	31.5	0.682169	0.875851	0.7825	0.765411	0.513721	0.55445	0.992963	0.880791	0.782423	0.654761					31.5	0.964747	0.882132	0.891572	0.911234	0.669928	0.921117	0.995748	1.04377	0.856831	0.620149
	32.5	0.663504	0.8649	0.811376	0.801936	0.567074	0.86769	1.01466	0.930608	0.766188	0.77964					32.5	0.883898	0.875964	0.901234	0.948499	0.677268	0.892012	0.968791	1.03882	0.852622	0.527391
	33.5	0.635237	0.852047	0.834719	0.788111	0.695989	1.01526	1.03431	1.01306	0.79232	0.93507					33.5	0.872322	0.85177	0.875149	0.956345	0.691976	0.875064	0.962611	1.00614	0.845898	0.605928
	34.5	0.73135	0.886707	0.863421	0.800048	0.662308	0.998707	1.10313	0.967324	0.832637	0.930587					34.5	0.904606	0.847075	0.843193	0.94251	0.758333	0.859795	0.939644	1.00127	0.839869	0.642453
	35.5	0.905152	0.971603	0.934388	0.871013	0.668466	0.995688	1.13329	1.01704	0.805249	1.23766					35.5	0.873518	0.849793	0.870543	0.986652	0.884736	0.839102	0.912972	0.997564	0.835551	0.703018
	36.5	0.949719	1.0017	0.942595	0.955344	0.747766	0.973633	1.11912	1.12883	0.875361	1.22815					36.5	0.997247	0.887873	1.05669	1.201	1.05262	0.859671	0.891291	1.05382	0.907341	0.924623
	37.5	0.938275	1.05504	0.989226	1.00793	0.962115	1.1147	1.04644	1.0535	0.911042	1.09106					37.5	1.13225	1.06053	1.09157	1.37113	1.35374	0.944365	0.890245	1.18778	1.04494	1.10005
	38.5	1.06365	1.06258	1.02295	1.06415	0.961232	1.17972	1.02638	1.07668	0.892176	1.29658					38.5	1.06609	1.17003	1.05445	1.34104	1.4322	0.922606	0.882451	1.15766	1.07488	1.22011
	39.5	1.03832	1.11803	1.0097	1.09676	1.03638	1.23971	1.0677	1.06559	0.944073	1.2142					39.5	1.13648	1.23493	1.06587	1.19096	1.52711	0.95729	0.900114	1.14387	0.986485	1.38395
	40.5	1.07331	1.1493	1.05326	1.06815	1.00127	1.06262	1.08699	1.10411	0.964635	1.35149					40.5	1.11632	1.29123	1.07881	1.21724	1.57173	0.972914	0.864424	1.12767	1.05051	1.14846
	41.5	1.30252	1.12371	1.11153	1.14956	1.16181	0.839652	1.15198	1.13527	0.977823	1.38447					41.5	1.03872	1.19227	1.14031	1.02233	1.39893	0.890821	0.961892	1.01531	1.27151	0.887064
	42.5	1.21381	1.26231	1.0629	1.0639	1.14741	1.13916	1.04084	1.02285	1.02654	1.2346					42.5	1.14212	1.23595	1.11162	0.973267	1.16975	0.933553	0.98962	1.00128	0.974849	1.41252
	43.5	1.64297	1.24791	1.12396	1.2245	1.12119	0.935437	1.09719	1.10966	1.05015	1.37915					43.5	1.00952	1.14741	1.13963	1.14855	1.16047	1.22326	0.975353	0.998489	0.876245	1.16747
	44.5	1.29958	1.10854	1.07645	1.10147	1.28346	0.76934	0.959424	1.0416	1.07714	1.53325					44.5	1.07039	1.10583	1.02205	1.0114	1.06591	0.932333	0.923462	0.998589	1.08323	0.982087
	45.5	1.10537	1.22676	1.10448	1.05044	1.16123	1.13053	1.07951	1.01953	1.0373	1.33689					45.5	0.98146	1.07484	1.07842	1.12721	1.00484	0.930739	0.870498	0.988106	0.970622	1.41132
	46.5	1.01648	1.10931	1.07322	1.09439	1.05379	0.675855	0.968901	0.96921	0.974438	1.10533					46.5	0.995403	1.08705	0.980575	0.939481	0.984	0.945278	0.871854	0.969226	0.953803	1.44477
	47.5	0.86519	0.950351	1.03916	1.05149	1.02458	0.589692	0.967377	0.992042	1.03535	1.13224					47.5	0.958617	1.06505	0.957266	0.91552	1.08108	1.02796	0.995437	1.03085	0.990613	1.08795
	48.5	1.55573	0.921128	0.979586	1.07654	0.986571	0.9683	0.939174	0.98633	0.974369	1.23132					48.5	1.13529	0.989886	0.888774	0.908959	0.870169	0.974575	0.970272	1.01732	0.979779	1.03348
	49.5	1.33849	1.03059	0.961786	1.12219	0.804941	0.906679	0.968282	0.917276	1.01265	1.05184					49.5	1.02931	0.984216	0.852407	0.92328	0.652461	1.12147	0.993575	1.02203	0.926484	0.751505
	50.5	0.883083	0.938657	0.8929	1.00495	0.586787	0.613722	0.885573	0.930887	0.987437	0.855044					50.5	1.0193	0.952803	0.871735	0.898675	0.72792	0.924891	0.933491	1.01651	0.847151	0.770806
	51.5	1.12232	0.837992	0.878858	0.917531	0.644282	0.434989	0.898504	0.950209	0.967529	0.817191					51.5	0.983952	0.91631	0.866167	0.896417	0.656113	0.849405	0.886317	0.988451	0.858111	0.707727
	52.5	0.738093	0.840609	0.860539	0.860672	0.529406	0.817236	0.874348	0.934391	0.979764	0.83512					52.5	0.925443	0.891961	0.856025	0.92146	0.741401	0.940006	0.90023	0.985041	0.871784	0.693036
	53.5	0.702457	0.846089	0.812949	0.876219	0.570039	0.65753	0.898353	0.939903	0.986985	0.769002					53.5	0.914132	0.895251	0.850788	0.932271	0.683925	0.871991	0.849527	1.0001	0.866782	0.629881
	54.5	0.698208	0.820037	0.800247	0.797909	0.57127	0.517862	0.888819	0.9017	0.884746	0.746415					54.5	0.893505	0.891127	0.848158	0.962726	0.769959	0.825601	0.843594	1.0798	0.980825	0.723574
	55.5	0.682169	0.875851	0.7825	0.765411	0.513721	0.544662	0.849313	0.976208	0.85723	0.81102					55.5	0.964747	0.882132	0.891572	0.911234	0.669928	0.85606	0.832581	1.02224	0.867404	0.674338
	56.5	0.663504	0.8649	0.811376	0.801936	0.567074	1.09725	0.881542	0.972398	0.836295	0.834958					56.5	0.883898	0.875964	0.901234	0.948499	0.677268	0.821596	0.843905	1.00866	0.818228	0.798575
	57.5	0.635237	0.852047	0.834719	0.788111	0.695989	0.824374	0.953551	0.98564	0.835838	0.869315					57.5	0.872322	0.85177	0.875149	0.956345	0.691976	0.812013	0.81944	0.959569	0.820743	0.648399
	58.5	0.73135	0.886707	0.863421	0.800048	0.662308	0.825114	0.930524	0.977947	0.777127	0.871184					58.5	0.904606	0.847075	0.843193	0.94251	0.758333	0.793422	0.80793	1.00493	0.874082	0.809346
	59.5	0.905152	0.971603	0.934388	0.871013	0.668466	1.00132	0.885308	1.00344	0.80923	0.861713					59.5	0.873518	0.849793	0.870543	0.986652	0.884736	0.801757	0.798336	1.04127	0.937228	0.861613
	60.5	0.949719	1.0017	0.942595	0.955344	0.747766	0.995274	0.889625	0.97761	0.86668	1.03968					60.5	0.997247	0.887873	1.05669	1.201	1.05262	0.800922	0.801608	1.12997	0.939328	0.952954
	61.5	0.938275	1.05504	0.989226	1.00793	0.962115	1.13655	0.945192	1.02108	0.912898	1.03841					61.5	1.13225	1.06053	1.09157	1.37113	1.35374	0.956349	0.949549	1.23246	1.12118	1.19424
	62.5	1.06365	1.06258	1.02295	1.06415	0.961232	1.06273	0.942098	1.01756	0.956893	1.29274					62.5	1.06609	1.17003	1.05445	1.34104	1.4322	1.03384	0.992573	1.1468	1.08909	1.22467
	63.5	1.03832	1.11803	1.0097	1.09676	1.03638	1.03737	0.983886	1.02529	1.01559	1.25238					63.5	1.13648	1.23493	1.06587	1.19096	1.52711	1.00597	0.974103	1.10941	1.0653	1.21919
	64.5	1.07331	1.1493	1.05326	1.06815	1.00127	1.24739	0.914628	1.11352	1.03546	1.39464					64.5	1.11632	1.29123	1.07881	1.21724	1.57173	0.95392	1.017	1.16459	0.905881	1.30206
	65.5	1.30252	1.12371	1.11153	1.14956	1.16181	0.862397	1.01643	1.09534	1.10908	1.39869					65.5	1.03872	1.19227	1.14031	1.02233	1.39893	0.987683	1.01165	1.15134	0.970613	1.16313
	66.5	1.21381	1.26231	1.0629	1.0639	1.14741	1.04581	1.0119	1.05114	1.08642	1.34419					66.5	1.14212	1.23595	1.11162	0.973267	1.16975	0.973519	1.0418	1.09544	0.950189	1.21526
	67.5	1.64297	1.24791	1.12396	1.2245	1.12119	0.71371	0.931908	1.11592	1.10036	1.41803					67.5	1.00952	1.14741	1.13963	1.14855	1.16047	0.948322	0.935823	1.16905	0.887593	1.64066
	68.5	1.29958	1.10854	1.07645	1.10147	1.28346	1.00131	0.90433	1.10119	1.06687	1.49281					68.5	1.07039	1.10583	1.02205	1.0114	1.06591	0.99355	0.894714	1.07538	0.90698	1.55464
	69.5	1.10537	1.22676	1.10448	1.05044	1.16123	0.85134	0.976911	1.11348	1.09723	1.38759					69.5	0.98146	1.07484	1.07842	1.12721	1.00484	0.990919	0.87917	1.05518	0.832676	1.26084
	70.5	1.01648	1.10931	1.07322	1.09439	1.05379	0.595354	1.00256	1.06705	1.11915	1.32727					70.5	0.995403	1.08705	0.980575	0.939481	0.984	0.90655	0.956457	1.03111	1.03685	0.905443
	71.5	0.86519	0.950351	1.03916	1.05149	1.02458	0.623632	0.862733	1.0534	1.02088	1.34995					71.5	0.958617	1.06505	0.957266	0.91552	1.08108	0.960142	0.988618	1.32724	0.863501	1.15519

## Sheet: Fig1B-peripheral
Time [hrs]	Waking [min/3min]	Bioluminescence	Selected wake (='1') and sleep bouts (='0')
12.05	3	205.71
12.1	3	193.18
12.15	3	186.47
12.2	3	180.43
12.25	0.93333	199.06
12.3	0.33333	208.31
12.35	1.1333	209.42
12.4	0.2	208
12.45	0.066667	213.63
12.5	0.33333	197.06
12.55	0.4	191.44
12.6	0.66667	190.13
12.65	0.066667	187.16
12.7	0.4	184.01
12.75	0.46667	177.83
12.8	0.8	180.08
12.85	1.7333	178.86
12.9	0.73333	190.85
12.95	1.0667	195.58
13	1.4667	185.59
13.05	3	162.84	1
13.1	3	163.44	1
13.15	3	186.11	1
13.2	3	222.74	1
13.25	3	243.54	1
13.3	3	239.77	1
13.35	3	228.19	1
13.4	3	214.44	1
13.45	3	196.51	1
13.5	2.9333	203.94	0
13.55	0.93333	196.1	0
13.6	0.73333	204.7	0
13.65	0.4	210.29	0
13.7	0.86667	213.51	0
13.75	0.66667	228.21	0
13.8	0.86667	213.03	0
13.85	0.86667	195.61	0
13.9	0.86667	202.57	0
13.95	0.66667	187.8	0
14	0.66667	162.29	0
14.05	3	168.01	1
14.1	3	178.37	1
14.15	2.8667	187.11	1
14.2	2.8667	184.95	1
14.25	3	181.31	1
14.3	3	237.72	1
14.35	3	214.68	1
14.4	2.8667	220.5	0
14.45	1.4	217.42	0
14.5	0.73333	223.71	0
14.55	0.4	213.72	0
14.6	0.46667	205.65	0
14.65	0.73333	199.66	0
14.7	1.4667	193.71	0
14.75	1.8667	182.98
14.8	0.46667	217.67
14.85	1.4667	211.16
14.9	2.8	183.77	1
14.95	3	175.5	1
15	3	194.18	1
15.05	3	214.91	1
15.1	3	225.81	1
15.15	3	236.01	1
15.2	3	222.13	1
15.25	3	232.02	1
15.3	3	245.16	1
15.35	3	262.49	1
15.4	3	237.79	1
15.45	2.8667	220.86	1
15.5	1.6	220.06	0
15.55	0.13333	232.78	0
15.6	0.73333	240.78	0
15.65	0.8	255.52	0
15.7	0.26667	268.94	0
15.75	0.26667	261.97	0
15.8	0.66667	250.73	0
15.85	0.53333	248.2	0
15.9	0.8	243.01	0
15.95	0.53333	237.21	0
16	0.73333	233.39	0
16.05	0.86667	217.04	0
16.1	0.13333	198.11	0
16.15	0.86667	196.45	0
16.2	1.1333	208.1	0
16.25	0.53333	202.06	0
16.3	0.53333	194.88	0
16.35	2.0667	193.35	1
16.4	3	163.89	1
16.45	3	173.41	1
16.5	3	171.57	1
16.55	3	221.39	1
16.6	3	250.31	1
16.65	3	236.11	1
16.7	3	243.63	1
16.75	3	236.59	1
16.8	2.8667	231.15	1
16.85	2.9333	226.42	1
16.9	3	229.76	1
16.95	3	222.03	1
17	3	257.01	1
17.05	3	270.52	1
17.1	3	261.46	1
17.15	3	206.71	1
17.2	3	209.51	1
17.25	2.7333	266.43	1
17.3	2.4	243.9	0
17.35	0.33333	244.08	0
17.4	0.4	232.02	0
17.45	0.6	237.36	0
17.5	0.86667	252.43	0
17.55	0.26667	254.01	0
17.6	0.66667	233.13	0
17.65	0.46667	250.91	0
17.7	0.2	252.29	0
17.75	0.2	244.72	0
17.8	0.26667	241.5	0
17.85	0.46667	259.41	0
17.9	0.73333	249.55	0
17.95	0.2	223.15	0
18	0.46667	219.16	0
18.05	0.46667	212.63	0
18.1	0.8	221.63	0
18.15	0.53333	234.02	0
18.2	0.8	226.95	0
18.25	1.5333	197.87
18.3	3	171.69
18.35	3	169.99
18.4	3	200.72
18.45	3	206.71
18.5	1	259.73
18.55	2	241.03
18.6	3	250.01
18.65	3	237.59
18.7	3	246.39
18.75	2.1333	260.6
18.8	2.8667	241.05
18.85	3	250.16
18.9	3	240.77
18.95	3	206.64
19	2.6667	212.11
19.05	0.13333	206.6
19.1	0.066667	206.67
19.15	2.3333	212.08
19.2	3	204.7
19.25	3	185.55
19.3	3	218.69
19.35	3	245.31
19.4	3	242.12
19.45	3	231.59
19.5	3	222.28
19.55	3	214.53
19.6	3	225.82
19.65	3	239.41
19.7	3	233.92
19.75	3	210.57
19.8	1.0667	216.4
19.85	2	236.93
19.9	0.6	233.54
19.95	0.26667	239.43
20	1.6	222.26
20.05	3	223.37
20.1	2.2	228.16
20.15	0.86667	213.83	0
20.2	0.66667	224.99	0
20.25	0.53333	235.72	0
20.3	0.46667	236.95	0
20.35	0.26667	226.73	0
20.4	0.13333	219.78	0
20.45	0.66667	216.85	0
20.5	0.13333	229.72	0
20.55	0.66667	222.77	0
20.6	0.13333	219.15	0
20.65	0.2	220.49	0
20.7	0.2	223.85	0
20.75	0.6	219.92	1
20.8	3	207.86	1
20.85	3	196.17	1
20.9	2.2667	200.35	1
20.95	2.7333	201.25	1
21	3	220.32	1
21.05	3	238.15	1
21.1	2.7333	261.39	1
21.15	3	247.18	1
21.2	3	242.4	1
21.25	0.13333	262.23
21.3	0.53333	240.72
21.35	2.8667	260.68	1
21.4	3	240	1
21.45	3	254.18	1
21.5	3	264	1
21.55	3	254.5	1
21.6	3	231.3	1
21.65	3	233.55	1
21.7	3	237.24	1
21.75	3	225.03	1
21.8	3	237.94	1
21.85	3	241.34	1
21.9	3	249.13	1
21.95	3	237.75	1
22	3	242.87	1
22.05	3	236.49	1
22.1	2.8667	236.81	1
22.15	2.8	276.53	1
22.2	2.8667	242.37	1
22.25	2.8667	219.58	0
22.3	0.8	232.98	0
22.35	0.53333	237.72	0
22.4	0.2	232.15	0
22.45	0.86667	234.62	0
22.5	0.33333	228.55	0
22.55	0.13333	225.34	0
22.6	0.33333	228.16	0
22.65	0.26667	223.3	0
22.7	0.6	222.02	0
22.75	0.46667	212.44	0
22.8	0.53333	210.45	0
22.85	0.6	204.43	0
22.9	0.66667	202.63	0
22.95	0.33333	198.06	0
23	2.0667	185.55	1
23.05	3	180.53	1
23.1	2.9333	176.32	1
23.15	2.8667	175.99	1
23.2	3	195.61	1
23.25	3	224.97	1
23.3	2.5333	221.64	0
23.35	0.93333	210.34	0
23.4	0.26667	218.45	0
23.45	0.8	217.23	0
23.5	0.4	217.93	0
23.55	0.73333	208.42	0
23.6	0.73333	204.47	0
23.65	0.53333	203.01	0
23.7	0.46667	203.52	0
23.75	0.53333	199.24	0
23.8	0.33333	198.44	0
23.85	0	195.24	0
23.9	0.2	192.12	0
23.95	0.6	193.23	0
24	0.53333	190.66	0
24.05	0.6	190.88	0
24.1	0.46667	186.84	0
24.15	0.6	187.71	0
24.2	0.13333	179.98	0
24.25	0.53333	184.28	0
24.3	0.8	182.93	0
24.35	0.66667	178.33	0
24.4	0.6	181.07	0
24.45	0.8	178.69	0
24.5	0.2	188.19	0
24.55	0.53333	179.66	0
24.6	0.6	175.53	0
24.65	0.2	179.51	0
24.7	0.13333	178.67	0
24.75	0.2	182.23	0
24.8	0.26667	179.83	0
24.85	0.66667	183.15	0
24.9	1.0667	182.18	0
24.95	2.7333	174.62	1
25	3	168.32	1
25.05	2.9333	173.86	1
25.1	2.8	182.21	1
25.15	2.9333	200.71	1
25.2	3	205.47	1
25.25	3	227.76	1
25.3	3	258.79	1
25.35	2.9333	247.79	1
25.4	2.6	244.62	1
25.45	3	242.51	1
25.5	3	231.25	1
25.55	3	233.9	1
25.6	3	229.17	1
25.65	3	209.46	1
25.7	3	218.35	1
25.75	3	212.34	1
25.8	3	200.56	1
25.85	3	199.08	1
25.9	3	198.59	1
25.95	3	205.2	1
26	3	205.09	1
26.05	3	196.14	1
26.1	3	191.99	1
26.15	3	192.52	1
26.2	2.7333	179.71	1
26.25	0.46667	197.84
26.3	3	203.56
26.35	2.1333	194.52
26.4	0.13333	198.08
26.45	0.53333	201.93
26.5	0.66667	187.84
26.55	0.33333	184.74
26.6	0.8	180.43
26.65	0.2	184.65
26.7	0.53333	189.39
26.75	0.33333	187.93
26.8	0.53333	175.96
26.85	0.33333	174.58
26.9	0.2	170.41
26.95	0.53333	170.04
27	0.6	167.11
27.05	0.33333	168.13
27.1	0.86667	164.25
27.15	0.13333	167.63
27.2	0.066667	162.7
27.25	0.13333	162.64
27.3	0.73333	161.11
27.35	0.93333	168.62
27.4	0.26667	171.78
27.45	0.066667	169.65
27.5	0.86667	168.55
27.55	0.53333	170.73
27.6	0.33333	165.13
27.65	0.93333	165.54
27.7	0.53333	164.59
27.75	0.2	166.21
27.8	2.8667	153.97
27.85	3	156.2
27.9	3	156.09
27.95	1.9333	178.5
28	1.8667	189.81
28.05	1	187.33	0
28.1	0.53333	181	0
28.15	0	183.96	0
28.2	0.86667	177.52	0
28.25	0.26667	177.17	0
28.3	0.73333	175.17	0
28.35	0.46667	176.48	0
28.4	0.33333	181.33	0
28.45	0.46667	177.98	0
28.5	0.2	179.43	0
28.55	0.6	171.41	0
28.6	0.86667	170.66	0
28.65	0.4	166.18	0
28.7	0.53333	166.4	0
28.75	0.6	166.9	0
28.8	0.66667	164.77	0
28.85	0.4	173.86	0
28.9	0.33333	179.38	0
28.95	0.73333	176.73	0
29	0.33333	171.34	0
29.05	0.26667	171.72	0
29.1	0.2	176.04	0
29.15	0.4	176.17	0
29.2	0.6	174.24	0
29.25	0.6	171.14	0
29.3	1.3333	170.05	1
29.35	3	165.61	1
29.4	3	164.11	1
29.45	3	161.84	1
29.5	3	165.2	1
29.55	2.7333	165.03	1
29.6	3	165.21	1
29.65	2.6667	188.7	1
29.7	3	184.35	0
29.75	1.4667	187.09	0
29.8	0.53333	186.61	0
29.85	0.26667	194.12	0
29.9	0.33333	192.84	0
29.95	0.53333	184.84	0
30	0.73333	175.33	0
30.05	0.4	178.54	0
30.1	0.93333	169.36	0
30.15	0.6	173.28	0
30.2	0.13333	170.53	0
30.25	0.4	173.07	0
30.3	0.33333	171.22	0
30.35	0.6	167.27	0
30.4	0.4	161.59	0
30.45	0.4	164.17	0
30.5	0.53333	167.11	0
30.55	0.2	162.11	0
30.6	0	164.14	0
30.65	0.46667	162.94	0
30.7	0.13333	161.79	0
30.75	0.46667	160.28	0
30.8	0.4	166.84	0
30.85	0.2	164.58	0
30.9	0.066667	165.99	0
30.95	1	164.46	0
31	0.73333	170.48	0
31.05	0.066667	167.35	0
31.1	1.6	162.62
31.15	3	163.81
31.2	3	161.88
31.25	2.1333	160.26
31.3	0.53333	174.71	0
31.35	0.6	185.16	0
31.4	0.46667	185.98	0
31.45	0.6	176.94	0
31.5	0.26667	177.77	0
31.55	0.4	181.22	0
31.6	0.53333	180.89	0
31.65	0.46667	174.85	0
31.7	0.93333	173.43	0
31.75	0.4	173.81	0
31.8	0.33333	169.42	0
31.85	0.6	167.91	0
31.9	0.4	168.38	0
31.95	0.066667	166.9	0
32	0.73333	170.28	0
32.05	0.53333	172.81	0
32.1	0.66667	173.04	0
32.15	0.4	171.58	0
32.2	0.2	173.49	0
32.25	0.6	167.45	0
32.3	0.53333	166.19	0
32.35	0.53333	167.48	0
32.4	0.4	167.02	0
32.45	0.2	164.51	0
32.5	0.46667	168.92	0
32.55	0.53333	169.48	0
32.6	0.86667	172.9	1
32.65	3	156.58	1
32.7	3	151.4	1
32.75	3	158.16	1
32.8	2.7333	152.12	1
32.85	2.6	172.84	1
32.9	3	168.13	1
32.95	3	185.4	1
33	3	184.32	1
33.05	3	174.21	1
33.1	3	179.61	1
33.15	3	171.22	1
33.2	3	173.24	1
33.25	3	179.74	1
33.3	3	180.74	0
33.35	0.46667	171.57	0
33.4	0.53333	173.02	0
33.45	0.26667	172.13	0
33.5	0.66667	172.05	0
33.55	0.8	172.01	0
33.6	1	167.08	0
33.65	0.4	178.93	0
33.7	0.4	177.53	0
33.75	0.4	177.8	0
33.8	0.2	174.18	0
33.85	0.66667	179.32	0
33.9	0.8	183.3	0
33.95	0.53333	180.15	0
34	0.13333	179.84	0
34.05	0.6	177.76	0
34.1	1.6667	174.38
34.15	3	165.92
34.2	3	160.55
34.25	3	165.64
34.3	2	177.78
34.35	0.6	179.21
34.4	0.2	181.77
34.45	0.53333	179.17
34.5	0.53333	179.88
34.55	1.4667	180.07
34.6	3	166.67	1
34.65	3	167.92	1
34.7	2.2667	172.17	1
34.75	3	179.91	1
34.8	3	191.2	1
34.85	3	193.29	1
34.9	3	188.96	1
34.95	3	191.83	1
35	3	183.5	1
35.05	3	192.62	1
35.1	3	195.45	1
35.15	3	204.16	1
35.2	3	206.1	1
35.25	3	187.26	1
35.3	3	200.82	0
35.35	0.66667	240.82	0
35.4	0.13333	222.52	0
35.45	0.4	219.54	0
35.5	0.33333	218.79	0
35.55	0.2	211.48	0
35.6	0.066667	212.93	0
35.65	0.4	209	0
35.7	0.6	197.61	0
35.75	0.46667	195.03	0
35.8	0.8	198.13	0
35.85	0.8	199.04	0
35.9	0.66667	194.96	0
35.95	0.8	192.58	0
36	0.73333	193.39	0
36.05	0.6	188.32	0
36.1	1.1333	178.2	0
36.15	3	177.11	1
36.2	3	171.83	1
36.25	2.2667	197.1	1
36.3	3	199.06	1
36.35	3	210.66	1
36.4	3	223.13	1
36.45	3	217.54	1
36.5	3	212.81	1
36.55	3	209.59	1
36.6	3	212.46	1
36.65	3	220.02	1
36.7	3	231.49	1
36.75	3	218.25	1
36.8	3	210.68	1
36.85	3	223.61	1
36.9	3	230.42	0
36.95	1.2667	259.33	0
37	0.4	251.96	0
37.05	0.4	251.03	0
37.1	0.2	249.28	0
37.15	0.86667	247.28	0
37.2	0.46667	240.35	0
37.25	0.73333	229.25	0
37.3	0.53333	230.52	0
37.35	0.8	220.41	0
37.4	0.6	214.53	0
37.45	2	213.22
37.5	3	209.98
37.55	3	193.4
37.6	2.6667	214.99
37.65	0.4	238.19
37.7	0.53333	226.82
37.75	0.6	220.62
37.8	0.33333	212.96
37.85	0.73333	206.41
37.9	2.5333	194.55	1
37.95	3	214.35	1
38	3	218.53	1
38.05	3	202.47	1
38.1	3	208.54	1
38.15	3	215.39	1
38.2	3	215.01	1
38.25	3	202.6	1
38.3	3	213.36	1
38.35	3	219.23	1
38.4	3	227.23	1
38.45	3	233.57	1
38.5	3	236.99	1
38.55	2.2	263.87	0
38.6	0.73333	286.49	0
38.65	0.4	256.7	0
38.7	0.73333	242.28	0
38.75	0	235.13	0
38.8	0.73333	237.24	0
38.85	0.26667	240.78	0
38.9	0.2	242.25	0
38.95	0.33333	234.79	0
39	0.4	240.55	0
39.05	1.1333	221	0
39.1	0.4	207.2	0
39.15	0.66667	224.94	0
39.2	0.26667	252.74	0
39.25	0.6	239.5	0
39.3	0.73333	242.48	0
39.35	0.33333	230.27	0
39.4	0.26667	220.63	0
39.45	0.6	215.27	0
39.5	0.53333	220.66	0
39.55	1.7333	214.97
39.6	3	206.91
39.65	3	202.53
39.7	3	207.38
39.75	3	212.79
39.8	1.3333	260.59	0
39.85	0	255.77	0
39.9	0.33333	265.11	0
39.95	0.46667	252.89	0
40	0.8	264.23	0
40.05	0.4	288.77	0
40.1	0.73333	298.93	0
40.15	0.33333	267.82	0
40.2	0.73333	268.38	0
40.25	0.8	272.47	0
40.3	0.4	272.68	0
40.35	1.4667	266.08	1
40.4	3	208.64	1
40.45	3	203.53	1
40.5	3	231.23	1
40.55	3	252.3	1
40.6	3	269.7	1
40.65	3	260.84	1
40.7	3	248.58	1
40.75	3	238.32	1
40.8	3	244.79	1
40.85	3	240.5	1
40.9	3	256.82	1
40.95	1	266.67
41	0.2	270.98
41.05	0.6	269.78
41.1	0.73333	270.12
41.15	1.0667	279.5
41.2	3	229.44
41.25	3	262.53
41.3	1.4667	271.41
41.35	0.4	283.17
41.4	0.2	278.1
41.45	1.8667	253.82
41.5	0.4	276.29
41.55	2	255.78	1
41.6	3	221.54	1
41.65	3	255.5	1
41.7	3	259.11	1
41.75	3	246.38	1
41.8	2.6667	250.87	1
41.85	3	240.7	1
41.9	3	240.88	1
41.95	3	226.88	1
42	3	238.97	1
42.05	3	263.16	1
42.1	2.8667	274.23	1
42.15	2.3333	248.88	1
42.2	2.4667	247.15	1
42.25	2.7333	246.55	1
42.3	2.8667	241.09	1
42.35	2.4	234.94	1
42.4	3	243.21	1
42.45	3	243.41	1
42.5	3	240.68	1
42.55	3	242.22	1
42.6	2.7333	240.76	1
42.65	3	247.74	1
42.7	3	239.61	1
42.75	3	254.13	1
42.8	3	286.04	0
42.85	0.8	302.2	0
42.9	0.26667	313.25	0
42.95	0.2	311.81	0
43	0.6	285.17	0
43.05	1.3333	272.51	0
43.1	0.2	269.18	0
43.15	0.066667	270.87	0
43.2	0.2	268.83	0
43.25	0.4	263.28	0
43.3	0.66667	263.55	0
43.35	0.6	269.55	0
43.4	0.26667	267.89	0
43.45	0.8	252.38	0
43.5	0.93333	250.77	0
43.55	0.13333	243.39	0
43.6	1.4	247.02	0
43.65	0.6	248.4	0
43.7	0.73333	231.07	0
43.75	0.2	223.01	0
43.8	0.4	219.66	0
43.85	0.2	227.28	0
43.9	0.46667	218.67	0
43.95	0.73333	227.47	0
44	0.2	228.34	0
44.05	0.33333	217.03	0
44.1	0.46667	231.86	0
44.15	0.2	224.78	0
44.2	0.13333	226.87	0
44.25	0.93333	230.41	0
44.3	0.73333	230.34	0
44.35	3	202.19	1
44.4	3	205.55	1
44.45	2.8	205.49	1
44.5	3	207.07	1
44.55	3	224.12	1
44.6	3	254.39	1
44.65	3	262.31	1
44.7	1.6	289.82	1
44.75	0.33333	283.89	1
44.8	1	269.3
44.85	2.8667	249.48
44.9	3	256.06
44.95	3	256.82
45	3	255.62
45.05	3	257.61
45.1	3	247.1
45.15	3	242.61
45.2	3	259.06
45.25	3	261.4
45.3	3	255.49
45.35	3	237.81
45.4	3	257.15
45.45	3	269.68
45.5	3	261.58
45.55	3	260.96
45.6	3	256.7
45.65	3	269.01
45.7	3	283.02
45.75	3	277.66
45.8	3	287.78
45.85	0.4	292.47
45.9	0.46667	258.9
45.95	0.2	236.33
46	2.8667	250.48
46.05	1.6	244.8
46.1	0.2	238.43
46.15	0	238.23
46.2	0.73333	250.21
46.25	0.33333	246.86
46.3	0.4	245.8
46.35	0.53333	244.31
46.4	0.4	240.38
46.45	0.93333	236.43
46.5	0.53333	229.95
46.55	0.53333	224.17
46.6	0.93333	234.18
46.65	0.33333	236.98
46.7	0.46667	235.5
46.75	0.46667	234.46
46.8	1.6	218.88
46.85	2.8667	197.02
46.9	2.8667	202.34
46.95	1.6667	209.03
47	1.6667	212.97
47.05	0.46667	217.62
47.1	0.6	211.49
47.15	0.46667	207.11
47.2	0.66667	200.7
47.25	0.33333	200.99
47.3	1	193.79
47.35	0.8	202.09
47.4	0.26667	202.07
47.45	0.6	202.78
47.5	0.4	199.61
47.55	0.93333	194.66
47.6	0.93333	199.28
47.65	0.86667	205.36
47.7	0.93333	202.71
47.75	0.66667	207.3
47.8	0.73333	205.32
47.85	0.66667	206.99
47.9	0.6	215.58
47.95	3	194.16
48	3	185.85
48.05	3	183.43
48.1	3	191.77
48.15	1.6667	200.69
48.2	0.26667	219.91	0
48.25	0.93333	217.58	0
48.3	0.2	214.88	0
48.35	0.33333	215.12	0
48.4	0.86667	211.86	0
48.45	0.26667	214.24	0
48.5	0.26667	216.31	0
48.55	0.26667	213.03	0
48.6	0.13333	208.17	0
48.65	1.2667	207.39	0
48.7	0.066667	209.26	0
48.75	0.46667	205.27	0
48.8	0.46667	207.03	0
48.85	0.86667	205.08	0
48.9	0.93333	209.19	0
48.95	0.8	206.06	0
49	0.93333	204.09	0
49.05	0.73333	198.72	1
49.1	2.2667	195.7	1
49.15	3	191.99	1
49.2	3	189.84	1
49.25	3	202.51	1
49.3	3	194.16	1
49.35	3	207.5	1
49.4	2.4667	233.88	1
49.45	2.8	236.97	1
49.5	2.8667	202.75	1
49.55	3	247.38	1
49.6	3	256.21	1
49.65	3	254.92	1
49.7	3	246.66	1
49.75	3	231.33	1
49.8	3	228.62	1
49.85	3	219.2	1
49.9	3	219.03	1
49.95	3	217.15	1
50	3	220.37	1
50.05	3	218.6	1
50.1	3	209.83	1
50.15	3	218.43	1
50.2	3	230.63	1
50.25	3	222.62	1
50.3	1.6667	233.26	0
50.35	0.6	229.96	0
50.4	0.46667	222.85	0
50.45	0.46667	208.83	0
50.5	0.73333	209.37	0
50.55	0.2	207.6	0
50.6	0.33333	205.93	0
50.65	0.26667	200.4	0
50.7	0.4	198.45	0
50.75	0.33333	194.06	0
50.8	0.53333	196.17	0
50.85	1	197.98	0
50.9	0.8	197.14	0
50.95	0.8	202.27	0
51	0.66667	205.68	0
51.05	0.33333	200.62	0
51.1	0.73333	198.26	0
51.15	0.26667	198.98	0
51.2	0.66667	199.41	0
51.25	0.6	191.12	0
51.3	0.86667	193.06	0
51.35	1.0667	195.77	0
51.4	3	175.64
51.45	3	176.23
51.5	3	177.92
51.55	3	178.9
51.6	1.8	187.73
51.65	0.6	185.38	0
51.7	0.86667	180.71	0
51.75	0.26667	188.87	0
51.8	0.46667	183.99	0
51.85	0.26667	189.95	0
51.9	0.66667	179.24	0
51.95	0.46667	187.09	0
52	0.2	181.89	0
52.05	0.33333	183.61	0
52.1	0.4	181.99	0
52.15	0.53333	179.48	0
52.2	0.066667	179.62	0
52.25	0.73333	179.4	0
52.3	0.53333	184.59	0
52.35	1.0667	175.99	0
52.4	0.4	179.77	0
52.45	0.73333	175.58	0
52.5	0.53333	173	0
52.55	0.73333	175.78	0
52.6	0.73333	182.06	0
52.65	0.33333	187.28	0
52.7	0.6	181.4	0
52.75	0.53333	183.33	0
52.8	0.46667	182.52	0
52.85	0.46667	184.28	0
52.9	0.46667	186.79	0
52.95	0.2	174.84	0
53	0.93333	171.98	0
53.05	0.4	174.65	0
53.1	1.4	177.67	1
53.15	3	164.61	1
53.2	3	172.19	1
53.25	3	170.89	1
53.3	2.8	181.67	1
53.35	3	181.56	1
53.4	3	183.08	1
53.45	1	196.37	0
53.5	0.066667	191.46	0
53.55	0.86667	191.29	0
53.6	0.6	198.89	0
53.65	0.33333	189.28	0
53.7	0.53333	190.24	0
53.75	0.26667	187.28	0
53.8	0.4	175.89	0
53.85	0.53333	178	0
53.9	0.6	180.12	0
53.95	1.2	174.28	0
54	0.46667	178.75	0
54.05	0.066667	172.86	0
54.1	0.66667	174.89	0
54.15	0.6	172.36	0
54.2	0.4	173.39	0
54.25	0.53333	169.88	0
54.3	0.4	169.84	0
54.35	0.8	176.89	0
54.4	0.53333	170.49	0
54.45	0.66667	172.36	1
54.5	3	163.55	1
54.55	3	162.75	1
54.6	3	165.67	1
54.65	3	170.56	1
54.7	3	181.83	1
54.75	2.2	195.15	1
54.8	0.93333	198.84	0
54.85	0.066667	197.33	0
54.9	1.1333	203.89	0
54.95	0.46667	203.81	0
55	0.26667	203.05	0
55.05	0.46667	202.79	0
55.1	0.6	201.91	0
55.15	0.86667	201.36	0
55.2	0.4	206.54	0
55.25	0.53333	203.9	0
55.3	0.53333	202.79	0
55.35	0.6	202.93	0
55.4	0.86667	198.6	0
55.45	0.6	197.09	0
55.5	0.46667	201.03	0
55.55	1.0667	194.79	0
55.6	1.1333	191.9	0
55.65	0.53333	203.64	0
55.7	0.46667	200	0
55.75	0.93333	190.54	1
55.8	2.7333	198.37	1
55.85	3	194.79	1
55.9	3	186.42	1
55.95	2.7333	196.87	1
56	3	199.58	1
56.05	3	201.34	1
56.1	3	211.57	1
56.15	3	202.51	1
56.2	3	191.22	1
56.25	3	190.71	1
56.3	3	189.83	1
56.35	3	189.03	1
56.4	3	199.44	1
56.45	3	196.35	1
56.5	3	192.13	1
56.55	2.1333	206.16	0
56.6	0.33333	208.59	0
56.65	0.53333	200.59	0
56.7	0.2	199.35	0
56.75	0.33333	198.53	0
56.8	0.6	197.8	0
56.85	0.66667	195.81	0
56.9	0.66667	194.39	0
56.95	0.4	199.75	0
57	0.93333	200.18	0
57.05	0.66667	197	0
57.1	0.53333	194.18	0
57.15	0.86667	195.23	0
57.2	0.46667	196.9	0
57.25	0.4	194.86	0
57.3	0.73333	190.49	0
57.35	0.33333	186.89	0
57.4	0.8	183.52	0
57.45	0.33333	185.84	0
57.5	0.93333	180.42	0
57.55	0.46667	183.31	0
57.6	0.2	184.38	0
57.65	0.26667	180.79	0
57.7	0.6	184.3	0
57.75	1	182.97	0
57.8	2.7333	175
57.85	3	169.05
57.9	3	173.63
57.95	3	174.77
58	0.66667	191.44
58.05	0.66667	182.84
58.1	2.7333	187.05
58.15	2.4	193.03
58.2	0.4	210.5
58.25	2.8	193.72	1
58.3	3	196.95	1
58.35	3	191.13	1
58.4	3	199.18	1
58.45	3	206.81	1
58.5	3	202.83	1
58.55	3	202.64	1
58.6	3	195.42	1
58.65	3	192.47	1
58.7	3	191.74	1
58.75	3	192.41	1
58.8	3	201.15	1
58.85	3	189.66	1
58.9	3	201	1
58.95	2.6	210.27	0
59	0.4	223.72	0
59.05	0.53333	226.57	0
59.1	0.26667	224.66	0
59.15	0.26667	228.33	0
59.2	0.66667	222.27	0
59.25	0.93333	219.41	0
59.3	0.2	215.95	0
59.35	0.73333	229.88	0
59.4	0.66667	213.18	0
59.45	0.8	201.91	0
59.5	0.26667	219.52	0
59.55	0.6	213.92	0
59.6	0.4	202.7	0
59.65	0.6	199.49	0
59.7	0.4	197.51	0
59.75	0.6	199.29	0
59.8	0.26667	197.34	0
59.85	0.066667	196.35	0
59.9	0.46667	194.97	0
59.95	2.5333	179.33	1
60	3	176.03	1
60.05	3	182.74	1
60.1	3	188.19	1
60.15	2.4667	207.77	1
60.2	3	215.98	1
60.25	3	215.74	1
60.3	3	209.9	1
60.35	3	207.68	1
60.4	3	215.84	1
60.45	3	219.42	1
60.5	3	213.2	1
60.55	3	212.18	1
60.6	3	212.96	1
60.65	3	211.99	1
60.7	3	203.6	1
60.75	3	212.47	1
60.8	3	233.09	0
60.85	1.2667	228.14	0
60.9	0.33333	224.77	0
60.95	0.46667	223.88	0
61	0.2	228.24	0
61.05	0.2	230.25	0
61.1	0.8	223.01	0
61.15	0.86667	218.68	0
61.2	3	201.24	1
61.25	3	187.11	1
61.3	3	195.2	1
61.35	3	204.98	1
61.4	3	215.72	1
61.45	3	208.44	1
61.5	3	216.19	1
61.55	3	218.24	1
61.6	3	227.8	1
61.65	3	214.87	1
61.7	3	248.43	0
61.75	1.1333	258.55	0
61.8	0.066667	255.55	0
61.85	0.86667	254.36	0
61.9	0.53333	253.67	0
61.95	0.4	247.05	0
62	0.73333	244.41	0
62.05	0.53333	234.73	0
62.1	0.6	236.84	0
62.15	0.6	241.8	0
62.2	0.73333	245.72	0
62.25	0.8	220.01	0
62.3	1.2667	207.48	0
62.35	3	190.91
62.4	3	189.09
62.45	2.3333	191.45
62.5	0.46667	219.03
62.55	1.1333	213.88
62.6	2.7333	203.11	1
62.65	3	219.38	1
62.7	3	201.05	1
62.75	3	227.52	1
62.8	3	230.35	1
62.85	3	235.55	1
62.9	3	228.49	1
62.95	3	221.98	1
63	3	225.3	1
63.05	3	226.37	1
63.1	3	232.24	1
63.15	3	233.09	1
63.2	3	224.82	1
63.25	3	232.01	1
63.3	3	227.79	1
63.35	3	236.9	1
63.4	3	235.86	1
63.45	3	238.6	1
63.5	3	230.47	1
63.55	3	245.41	1
63.6	3	229.7	1
63.65	3	246.86	1
63.7	3	249.29	1
63.75	3	246.52	1
63.8	3	250.9	1
63.85	2.5333	282.97	1
63.9	1.9333	270.06	0
63.95	0.53333	280.67	0
64	0.53333	276.89	0
64.05	0.46667	267.76	0
64.1	0	252.92	0
64.15	0.73333	239.13	0
64.2	0.46667	237.17	0
64.25	2.3333	218.42
64.3	3	214.16
64.35	3	223.74
64.4	1.5333	216.35
64.45	0.26667	214.06
64.5	1.1333	219.87
64.55	0.2	235.36
64.6	0.6	246.65
64.65	0.26667	239.9
64.7	0.13333	234.66
64.75	0.2	236.49
64.8	0.26667	236.87
64.85	1.0667	222.54
64.9	0.46667	225.21
64.95	0.2	239.57
65	0.33333	236.93
65.05	0.13333	233.13
65.1	0.73333	220.85
65.15	0.86667	209.36
65.2	0.4	210.06
65.25	0.6	206.62
65.3	0.6	212.24
65.35	0.4	212.87
65.4	1.0667	214.96
65.45	0.73333	216.68
65.5	0.13333	241.55
65.55	1	233.6
65.6	0.066667	234.31
65.65	0.46667	232.94
65.7	0.46667	230.48
65.75	0.4	227.28
65.8	0.86667	229.2
65.85	0.73333	239.67
65.9	3	218.67
65.95	3	225.1
66	3	210.15
66.05	1.3333	230.73
66.1	0.33333	236.87
66.15	1.6	240.49
66.2	3	205.25
66.25	3	253.59
66.3	3	327.17
66.35	0.86667	342.69
66.4	0.6	339.91
66.45	0.46667	346.5
66.5	0.66667	336.21
66.55	2.3333	278.28
66.6	3	248.49
66.65	3	228
66.7	1.0667	296.27
66.75	0.8	310.68
66.8	3	266.61	1
66.85	3	270.57	1
66.9	3	274.15	1
66.95	3	262.89	1
67	3	256.52	1
67.05	3	256.19	1
67.1	3	260.53	1
67.15	3	265.04	1
67.2	3	276.11	1
67.25	3	266.69	1
67.3	3	265.94	1
67.35	3	262.99	1
67.4	3	276.86	1
67.45	3	266.11	1
67.5	3	290.32	1
67.55	3	294.92	1
67.6	2.6667	314.68	0
67.65	0.6	319.79	0
67.7	0.6	306.11	0
67.75	0.2	313.49	0
67.8	0	296.54	0
67.85	1	298.21	0
67.9	0.26667	292.08	0
67.95	0.13333	281.2	0
68	0.8	271.4	0
68.05	0.8	261.47	0
68.1	0.46667	253.19	0
68.15	0.26667	252.01	0
68.2	0.66667	236.42	0
68.25	0.53333	241.87	0
68.3	0.2	219.89	0
68.35	0.13333	213.08	0
68.4	0.8	227.3	0
68.45	0.13333	260.57	0
68.5	0.6	257.64	0
68.55	0.53333	252.29	0
68.6	0.46667	246.98	0
68.65	0.8	238.77	0
68.7	1.0667	238.3	0
68.75	0.73333	222.11	0
68.8	0.8	227.36	0
68.85	3	209.03
68.9	3	202.81
68.95	3	193.97
69	3	212.35
69.05	2.7333	238.16
69.1	1	263.78
69.15	1.4	254.85
69.2	3	233.48	1
69.25	3	257.46	1
69.3	3	281.62	1
69.35	3	289.82	1
69.4	3	270.56	1
69.45	3	264.99	1
69.5	3	258.06	1
69.55	3	264.51	1
69.6	3	267.07	1
69.65	3	268.63	1
69.7	3	252.65	1
69.75	3	260.95	1
69.8	3	257.4	1
69.85	3	264	1
69.9	3	266.96	1
69.95	3	269.74	1
70	3	256.83	1
70.05	3	257.11	1
70.1	3	247.46	1
70.15	3	239.16	1
70.2	3	241.74	1
70.25	3	236.68	1
70.3	3	236.5	1
70.35	3	239.93	1
70.4	3	232.53	1
70.45	3	242.92	1
70.5	3	246.72	1
70.55	2.4667	259.7	0
70.6	0.46667	266.2	0
70.65	0.46667	251.42	0
70.7	0.93333	244.49	0
70.75	0.066667	247.79	0
70.8	0.33333	243.08	0
70.85	1.0667	230.68	0
70.9	0.8	229.93	0
70.95	0.53333	225.11	0
71	0.8	223.92	0
71.05	0	220.68	0
71.1	1.2	220.57	0
71.15	0.73333	205.44	0
71.2	2.6	205.4
71.25	3	196.72
71.3	0.86667	202.03
71.35	0.13333	201.32
71.4	0.2	201.22
71.45	0.6	204
71.5	0.66667	199.87
71.55	0.8	204.85
71.6	0.66667	198.32
71.65	0.4	199.66
71.7	0.53333	194.8
71.75	0.53333	197.2
71.8	0.53333	197.63
71.85	0.46667	199.63
71.9	0.33333	201.13
71.95	0.93333	195.54

## Sheet: Fig1B-central
Time [hrs]	Waking [min/3min]	Bioluminescence	Selected wake (='1') and sleep bouts (='0')
12.05	0.266667	209.978
12.1	2.13333	242.204
12.15	2.53333	235.564
12.2	3	208.234
12.25	3	229.482
12.3	1.66667	199.153
12.35	0.733333	205.357
12.4	3	219.827
12.45	3	215.542
12.5	3	207.346
12.55	3	234.549
12.6	3	222.798
12.65	3	212.579
12.7	2.46667	212.005
12.75	0.466667	226.076
12.8	0.4	235.813
12.85	0.666667	225.772
12.9	3	242.998
12.95	2.26667	216.757
13	1.13333	210.561
13.05	3	224.52
13.1	3	207.324
13.15	3	258.461
13.2	3	308.109
13.25	3	302.246
13.3	3	239.406
13.35	2.73333	230.01
13.4	0.6	218.213
13.45	0.066667	221.439
13.5	2.6	246.599
13.55	1.66667	219.714
13.6	0.333333	210.028
13.65	0.533333	239.677
13.7	2.6	240.325
13.75	3	241.062
13.8	3	225.866
13.85	3	242.581
13.9	3	236.962
13.95	3	245.366
14	3	258.325
14.05	3	279.507
14.1	3	258.399
14.15	1.6	285.781
14.2	0.333333	250.54
14.25	0.466667	243.7
14.3	0.6	239.859
14.35	2.53333	247.707
14.4	3	229.066
14.45	3	238.448
14.5	3	236.829
14.55	3	351.722
14.6	2.86667	323.859
14.65	0.866667	258.507
14.7	0.666667	242.578
14.75	0.6	253.159
14.8	2.13333	257.808
14.85	0.866667	203.1
14.9	1.93333	217.859
14.95	3	214.197
15	3	254.378
15.05	3	322.204
15.1	3	312.363
15.15	3	302.856
15.2	3	224.993
15.25	3	247.197
15.3	3	250.445
15.35	2.53333	226.138
15.4	3	291.053
15.45	3	316.412
15.5	3	286.038
15.55	3	344.908
15.6	3	321.89
15.65	2.6	289.249
15.7	0.2	197.275
15.75	0.333333	191.546
15.8	0.333333	190.683
15.85	1	200.286
15.9	2.46667	242.379
15.95	0.333333	201.783
16	1.26667	222.809
16.05	2.73333	236.613
16.1	3	229.505
16.15	3	226.953
16.2	3	295.357
16.25	3	229.761
16.3	3	282.543
16.35	3	267.568
16.4	3	264.394
16.45	2.6	243.198
16.5	3	242.98
16.55	3	270.584
16.6	1.06667	221.01
16.65	2.13333	229.324
16.7	3	282.661
16.75	3	283.954
16.8	3	261.647
16.85	3	220.206
16.9	3	225.01
16.95	3	330.969
17	1.66667	200.995
17.05	0.333333	189.421
17.1	2.13333	210.447
17.15	2.06667	237.984
17.2	0.2	219.455
17.25	2.06667	231.014
17.3	3	225.351
17.35	1	225.866
17.4	0.733333	225.003
17.45	1.8	214.207
17.5	3	218.988
17.55	1.26667	220.525
17.6	0.6	217.796
17.65	3	213.222	0
17.7	3	234.981	0
17.75	3	246.118	0
17.8	3	264.055	0
17.85	2.73333	287.281	0
17.9	0.2	231.485	1
17.95	1.13333	243.467	1
18	0.333333	229.67	1
18.05	0	216.785	1
18.1	0.6	220.145	1
18.15	0.266667	234.971	1
18.2	0.333333	238.952	1
18.25	0.333333	239.911	1
18.3	0.6	242.115	1
18.35	0	221.274	1
18.4	0.733333	197.9	1
18.45	3	235.638	0
18.5	3	204.219	0
18.55	3	208.356	0
18.6	3	208.449	0
18.65	3	269.63	0
18.7	3	285.368	0
18.75	3	252.038	0
18.8	3	287.397	0
18.85	0.466667	220.534
18.9	0.4	243.605
18.95	0.333333	261.52
19	0.333333	271.168
19.05	1.93333	280.127	1
19.1	3	243.198	1
19.15	3	265.024	1
19.2	3	339.827	1
19.25	3	330.52	1
19.3	3	276.213	1
19.35	2.53333	281.083	1
19.4	0.2	210.598	0
19.45	0.333333	214.268	0
19.5	1.4	232.717	0
19.55	1.46667	269.876	0
19.6	0.4	236.769	0
19.65	0.666667	298.128	0
19.7	0.266667	284.243	0
19.75	0.4	256.691	0
19.8	1.26667	218.006	0
19.85	3	242.432	1
19.9	3	220.591	1
19.95	3	295.573	1
20	3	315.31	1
20.05	3	307.825	1
20.1	2.26667	258.317	1
20.15	2.86667	242.232	1
20.2	3	312.68	1
20.25	3	313.373	1
20.3	2.4	251.155	1
20.35	3	295.403	1
20.4	3	318.562	1
20.45	3	349.233	1
20.5	3	348.259	1
20.55	3	278.84	1
20.6	3	323.999	1
20.65	3	291.559	1
20.7	3	314.851	1
20.75	3	240.788	1
20.8	3	334.459	1
20.85	3	331.285	1
20.9	3	294.266	1
20.95	3	296.137	1
21	3	282.852	1
21.05	3	293.033	1
21.1	3	320.148	1
21.15	3	262.53	1
21.2	3	247.711	1
21.25	3	339.937	1
21.3	3	255.541	1
21.35	3	263.923	1
21.4	3	285.237	1
21.45	0.6	187.108
21.5	1.53333	195.645
21.55	0.133333	214.626	0
21.6	1.06667	228.075	0
21.65	0.266667	211.567	0
21.7	0.466667	210.593	0
21.75	0.133333	194.352	0
21.8	0.4	184.867	0
21.85	0.266667	175.516	0
21.9	0.066667	174.364	0
21.95	0.133333	171.079	0
22	0.933333	182.371	0
22.05	0.4	175.531	0
22.1	0	169.334	0
22.15	0.933333	164.894	0
22.2	0	161.72	0
22.25	1.06667	169.768	0
22.3	0.933333	178.861	0
22.35	0.466667	183.287	0
22.4	0.733333	182.224	0
22.45	0.733333	170.872	0
22.5	0.466667	171.587	0
22.55	0.133333	174.835	0
22.6	0.533333	168.505	0
22.65	0.266667	166.131	0
22.7	0.066667	170.313	0
22.75	1.86667	185.606	1
22.8	3	180.187	1
22.85	3	174.902	1
22.9	3	176.528	1
22.95	3	202.065	1
23	3	266.002	1
23.05	3	285.695	1
23.1	3	282.498	1
23.15	3	292.569	1
23.2	3	312.706	1
23.25	3	287.776	1
23.3	3	326.069	1
23.35	3	322.54	1
23.4	3	385.788	1
23.45	3	312.769	1
23.5	3	346.351	1
23.55	3	295.177	1
23.6	0.066667	328.314
23.65	2.26667	279.629
23.7	3	309.699
23.75	3	273.836
23.8	3	260.84
23.85	0.266667	251.999
23.9	0.133333	256.692
23.95	0.066667	252.251
24	0.6	226.1
24.05	0	216.415
24.1	0.933333	216.729
24.15	0.133333	229.555
24.2	0.6	222.426
24.25	0.333333	206.852
24.3	0	201.033
24.35	0.466667	192.482
24.4	0.066667	183.396
24.45	0.133333	185.022
24.5	0.133333	183.848
24.55	0.066667	185.541
24.6	1.46667	190.9
24.65	0.2	179.548
24.7	0.066667	183.33
24.75	2.33333	194.489
24.8	3	200.293
24.85	3	193.808
24.9	1.8	193.278
24.95	0.2	190.06	0
25	0.6	183.73	0
25.05	0	177.445	0
25.1	0.866667	185.138	0
25.15	0.8	178.297	0
25.2	0.4	181.723	0
25.25	0.333333	177.816	0
25.3	0.333333	178.975	0
25.35	0.466667	173.868	0
25.4	0.733333	179.983	0
25.45	0.8	176.742	0
25.5	0.533333	172.59	0
25.55	0.733333	182.95	0
25.6	0.933333	181.242	0
25.65	1	182.646	0
25.7	0.533333	186.605	0
25.75	1.2	174.342	0
25.8	0.6	179.924	0
25.85	0.733333	175.839	0
25.9	0.666667	179.887	0
25.95	1.33333	179.602	0
26	0.066667	175.583	0
26.05	0.8	169.965	0
26.1	0.266667	172.547	0
26.15	0	166.017	0
26.2	0.333333	167.443	0
26.25	0.066667	164.602	0
26.3	0.266667	163.495	0
26.35	2.6	183.988	1
26.4	3	190.502	1
26.45	3	185.906	1
26.5	3	224.776	1
26.55	3	204.047	1
26.6	3	210.784	1
26.65	3	236.477	1
26.7	3	226.125	1
26.75	3	222.862	1
26.8	3	250.444	1
26.85	3	232.536	1
26.9	3	254.984	1
26.95	3	249.966	1
27	3	253.903	1
27.05	0.266667	260.085	0
27.1	0.133333	267.288	0
27.15	0.066667	267.07	0
27.2	0.666667	232.562	0
27.25	0.2	220.833	0
27.3	0.333333	224.792	0
27.35	0.266667	216.485	0
27.4	0.133333	220.578	0
27.45	0.4	207.848	0
27.5	0.2	190.985	0
27.55	0.066667	182.1	0
27.6	0.133333	182.681	0
27.65	0.2	199.241	0
27.7	0.6	204	0
27.75	0.333333	202.182	0
27.8	0.2	205.008	0
27.85	0.2	199.434	0
27.9	0.333333	199.437	0
27.95	0.466667	191.641	0
28	0.866667	192.778	0
28.05	0.6	189.493	0
28.1	0.733333	193.475	0
28.15	1.6	188.123
28.2	0	179.104
28.25	0.466667	185.197
28.3	1.53333	177.423
28.35	0.266667	177.227	0
28.4	0.466667	175.964	0
28.45	0.533333	176.279	0
28.5	0.533333	176.86	0
28.55	0.666667	175.909	0
28.6	0.266667	180.601	0
28.65	0.133333	174.716	0
28.7	0.666667	177.542	0
28.75	0.266667	174.724	0
28.8	0.6	176.105	0
28.85	0.266667	170.264	0
28.9	1.4	171.89	1
28.95	3	181.827	1
29	3	181.054	1
29.05	3	187.324	1
29.1	3	184.394	1
29.15	3	189.62	1
29.2	3	194.446	1
29.25	0.866667	194.806	0
29.3	0.133333	190.187	0
29.35	0	186.169	0
29.4	1.13333	182.572	0
29.45	0.733333	199.554	0
29.5	0.266667	209.491	0
29.55	0.933333	215.85	0
29.6	1.13333	213.365	0
29.65	0.4	204.569	0
29.7	0	195.417	0
29.75	1.53333	195.554
29.8	0.133333	194.003	0
29.85	0.133333	189.384	0
29.9	0.266667	186.966	0
29.95	0.2	191.592	0
30	0.8	193.862	0
30.05	1	187.821	0
30.1	0.533333	185.692	0
30.15	1.13333	183.185	0
30.2	0.8	178.81	0
30.25	0.333333	184.659	0
30.3	0.4	175.418	0
30.35	3	179.399	1
30.4	3	174.114	1
30.45	3	177.251	1
30.5	3	184.544	1
30.55	3	204.415	1
30.6	2.26667	188.641	1
30.65	0.133333	190.111
30.7	0.133333	190.226
30.75	0.733333	184.385
30.8	1	194.678
30.85	0.133333	189.348
30.9	0.733333	192.019
30.95	0.266667	195.467
31	0.533333	190.959
31.05	1.4	193.608
31.1	0.466667	191.967
31.15	0.4	190.504
31.2	0	184.775
31.25	0.8	185
31.3	0.266667	173.049
31.35	0.066667	169.03
31.4	0.466667	174.212
31.45	0.133333	174.527
31.5	0.4	171.753
31.55	0.066667	175.712
31.6	0.666667	178.982
31.65	0.6	166.742
31.7	0.2	165.701
31.75	0.2	163.883
31.8	0.333333	163.197
31.85	0.6	162.557
31.9	0.266667	168.272
31.95	0.533333	169.453
32	3	181.501
32.05	3	183.905
32.1	2.13333	188.109
32.15	0.133333	189.735
32.2	0.266667	194.539
32.25	2	193.409
32.3	3	200.924
32.35	2.26667	205.639
32.4	0.2	196.665
32.45	0.866667	196.069
32.5	0.533333	187.961
32.55	0.6	194.587
32.6	0.333333	186.724
32.65	0.266667	181.639
32.7	0.8	183.999
32.75	0.266667	174.936
32.8	0.666667	186.295
32.85	0.133333	181.943
32.9	0.733333	179.725
32.95	1	185.328
33	0.333333	179.243
33.05	0.4	182.069
33.1	0.4	185.362
33.15	0.933333	177.81
33.2	0.4	174.858
33.25	0.666667	182.662
33.3	0.266667	182.377
33.35	0.533333	188.803
33.4	0.066667	184.718
33.45	1.06667	183.833
33.5	0.733333	187.748
33.55	0.8	188.685
33.6	3	175.288
33.65	3	180.292
33.7	3	183.696
33.75	1.46667	178.655
33.8	0.4	182.481
33.85	0.266667	188.774
33.9	0.133333	185.111
33.95	0	192.093
34	0.8	194.385
34.05	0.666667	194.967
34.1	0.333333	192.148
34.15	0.533333	178.174
34.2	0.4	164.2
34.25	0.533333	171.093
34.3	1.2	172.719
34.35	0.8	179.945
34.4	0.533333	181.615
34.45	0.466667	179.197
34.5	0.4	173.534
34.55	0.8	173.827
34.6	0.333333	172.741
34.65	0.533333	169.545
34.7	0.733333	167.171
34.75	3	181.108
34.8	3	183.179
34.85	1.46667	177.76
34.9	0.266667	179.497
34.95	0.866667	187.968
35	0.333333	190.749
35.05	1.4	188.798
35.1	0.6	183.335
35.15	0.6	183.116
35.2	0	168.875
35.25	2.86667	183.546
35.3	3	200.327
35.35	2.53333	207.842
35.4	1.33333	200.246
35.45	0.4	183.761
35.5	1.93333	205.743	1
35.55	3	202.546	1
35.6	3	213.172	1
35.65	3	192.42	1
35.7	3	213.313	1
35.75	3	257.384	1
35.8	0.6	196.787	0
35.85	0.333333	211.924	0
35.9	0.466667	222.706	0
35.95	0.466667	212.754	0
36	0	197.402	0
36.05	2.93333	234.206
36.1	3	212.388
36.15	2.4	207.636
36.2	0.266667	195.306
36.25	2.46667	253.888
36.3	3	236.047
36.35	3	243.762
36.4	3	211.166
36.45	3	262.592
36.5	3	206.218
36.55	3	205.955
36.6	3	203.603
36.65	3	215.74
36.7	3	202.388
36.75	3	214.881
36.8	1.26667	210.485
36.85	0.2	182.4
36.9	0.2	196.226
36.95	0.933333	203.363
37	3	224.278
37.05	3	226.015
37.1	0.466667	197.73
37.15	0.8	199.111
37.2	0.866667	207.159
37.25	2.46667	234.141	1
37.3	3	233.722	1
37.35	3	273.615	1
37.4	3	259.73	1
37.45	3	287.2	1
37.5	3	288.693	1
37.55	3	219.519	1
37.6	3	306.967	1
37.65	2.86667	289.482	1
37.7	3	225.819	1
37.75	3	212.889	1
37.8	3	266.293	1
37.85	3	216.097	1
37.9	3	216.479	1
37.95	2.26667	222.193	1
38	0.733333	237.264	0
38.05	0.333333	234.045	0
38.1	0.466667	224.827	0
38.15	0.266667	212.475	0
38.2	1.2	220.257	0
38.25	3	227.105
38.3	3	216.686
38.35	3	219.49
38.4	0.6	224.627
38.45	0.333333	238.187
38.5	0.533333	237.39
38.55	3	229.439
38.6	3	211.754
38.65	3	216.424
38.7	3	250.139
38.75	3	258.409
38.8	3	236.102
38.85	3	217.239
38.9	2.53333	213.176
38.95	0.8	226.935
39	0.4	178.561
39.05	0.6	174.676
39.1	2.13333	201.324
39.15	3	220.973
39.2	3	227.999
39.25	3	305.425
39.3	3	276.339
39.35	2.73333	246.077
39.4	3	229.347
39.45	3	206.04
39.5	3	191.755
39.55	3	253.003
39.6	3	273.807
39.65	3	254.944
39.7	3	266.725
39.75	3	274.151
39.8	3	302.577
39.85	3	386.603
39.9	3	215.896
39.95	3	240.188
40	3	235.592
40.05	0.2	210.64
40.1	0.2	215.266
40.15	0.066667	209.315
40.2	2.66667	230.252
40.25	1.8	227.122
40.3	0.8	227.481
40.35	0.066667	222.463
40.4	0.466667	229.133
40.45	0.133333	214.159
40.5	2.26667	226.341
40.55	2.53333	212.611
40.6	1.46667	191.948
40.65	3	296.397
40.7	3	298.578
40.75	3	231.626
40.8	3	208.897
40.85	3	326.256
40.9	3	290.971
40.95	0.333333	201.686
41	0.4	204.712
41.05	3	205.115
41.1	3	222.053
41.15	2.06667	237.345
41.2	1.06667	245.638
41.25	1.13333	224.753
41.3	1.6	218.823
41.35	1.26667	223.738
41.4	0.2	211.92
41.45	2.46667	216.79	1
41.5	2.53333	215.705	1
41.55	2.53333	214.331	1
41.6	3	300.446	1
41.65	3	230.294	1
41.7	3	297.498	1
41.75	3	284.568	1
41.8	3	291.861	1
41.85	3	231.22	1
41.9	0.666667	216.713	0
41.95	0.333333	224.405	0
42	0.066667	236.631	0
42.05	0.8	245.591	0
42.1	0.133333	254.683	0
42.15	0.666667	245.487	0
42.2	0.066667	243.313	0
42.25	0.466667	228.273	0
42.3	0.4	189.698	0
42.35	2.6	203.68	1
42.4	3	207.595	1
42.45	3	199.665	1
42.5	3	325.18	1
42.55	2.4	265.917	1
42.6	2	247.81	1
42.65	3	291.103	1
42.7	3	275.395	1
42.75	3	272.088	1
42.8	3	235.381	1
42.85	3	305.073	1
42.9	3	309.166	1
42.95	3	300.77	1
43	3	251.262	1
43.05	3	358.622	1
43.1	3	394.092	1
43.15	3	252.985	1
43.2	1.46667	227.255
43.25	0.533333	277.792
43.3	0.133333	257.018
43.35	2.73333	262.222
43.4	1.13333	208.959
43.45	0	230.052
43.5	0.266667	243.989
43.55	1.13333	204.481
43.6	3	220.885	1
43.65	3	305.267	1
43.7	3	328.848	1
43.75	3	387.519	1
43.8	2.66667	235.656	1
43.85	3	293.304	1
43.9	3	324.93	1
43.95	3	361.845	1
44	3	292.204	1
44.05	3	377.452	1
44.1	3	288.856	1
44.15	3	248.815	1
44.2	3	233.241	1
44.25	1.4	293.623	0
44.3	0.466667	252.516	0
44.35	0.733333	262.231	0
44.4	0	287.456	0
44.45	0.533333	273.26	0
44.5	0.133333	253.064	0
44.55	2.26667	246.401	1
44.6	3	229.249	1
44.65	3	222.475	1
44.7	3	257.857	1
44.75	3	338.905	1
44.8	3	295.442	1
44.85	3	304.446	1
44.9	3	284.205	1
44.95	3	230.631	1
45	2.66667	224.635	1
45.05	3	218.372	1
45.1	1.26667	239.798	0
45.15	0.333333	234.402	0
45.2	0.066667	240.961	0
45.25	0.733333	206.343	0
45.3	0.133333	187.946	0
45.35	0	189.461	0
45.4	0.733333	177.109	0
45.45	0.133333	176.224	0
45.5	0.066667	167.539	0
45.55	2.46667	200.987	1
45.6	3	208.702	1
45.65	3	197.75	1
45.7	3	203.265	1
45.75	3	247.402	1
45.8	3	235.362	1
45.85	3	240.365	1
45.9	3	260.569	1
45.95	3	358.262	1
46	3	209.399	1
46.05	3	214.647	1
46.1	3	263.229	1
46.15	3	212.677	1
46.2	3	222.036	1
46.25	2.13333	246.462	1
46.3	0.266667	215.555	0
46.35	0.133333	220.359	0
46.4	0.2	232.385	0
46.45	0.133333	223.055	0
46.5	1.26667	212.259	0
46.55	2.93333	225.751
46.6	2.33333	206.2
46.65	0.6	192.648
46.7	0.133333	186.563
46.75	0	180.011
46.8	1.8	189.304
46.85	0.066667	194.263
46.9	0.533333	187.178
46.95	0.4	183.693
47	0.333333	182.63
47.05	0.333333	180.611
47.1	1.6	179.66
47.15	2	177.219
47.2	0.133333	165.823	0
47.25	0.933333	176.76	0
47.3	0.333333	174.497	0
47.35	0.2	171.256	0
47.4	0.6	174.371	0
47.45	0.533333	167.419	0
47.5	1	172.112	0
47.55	0.066667	164.827	0
47.6	1.46667	166.964	0
47.65	3	173.279	1
47.7	3	172.371	1
47.75	3	177.064	1
47.8	3	228.046	1
47.85	3	300.805	1
47.9	3	246.231	1
47.95	3	210.612	1
48	3	209.772	1
48.05	3	222.62	1
48.1	3	228.846	1
48.15	3	237.961	1
48.2	3	231.676	1
48.25	3	248.124	1
48.3	3	221.194	1
48.35	3	227.531	1
48.4	3	233.157	1
48.45	2.46667	215.117	1
48.5	0.266667	235.876	0
48.55	0.133333	204.257	0
48.6	0.133333	207.372	0
48.65	0	202.998	0
48.7	0.466667	200.713	0
48.75	0.333333	202.828	0
48.8	0.4	203.676	0
48.85	0.6	216.725	0
48.9	0.533333	205.795	0
48.95	0.266667	199.021	0
49	0.466667	202.336	0
49.05	0.666667	193.384	0
49.1	0.2	193.966	0
49.15	0.133333	195.303	0
49.2	0.533333	192.44	0
49.25	0.2	191.599	0
49.3	1.26667	188.892	0
49.35	0.066667	188.696	0
49.4	2	185.522
49.45	3	184.259
49.5	1.26667	179.507
49.55	0	169.955
49.6	0.066667	168.603
49.65	0.133333	173.851
49.7	0.733333	180.388
49.75	0.466667	186.348
49.8	0.133333	182.529
49.85	0.2	187.266
49.9	0.2	183.715
49.95	0.466667	183.074
50	0.2	181.278
50.05	0.266667	178.259
50.1	0.4	184.063
50.15	0.266667	194.933
50.2	0.533333	182.115
50.25	0.6	181.141
50.3	1.53333	181.545
50.35	1	182.86
50.4	0.4	183.819
50.45	0	182.534
50.5	0.733333	181.493
50.55	0.733333	186.052
50.6	0.2	197.478
50.65	0.666667	192.838
50.7	1.93333	193.419
50.75	0.866667	178.956	0
50.8	0.333333	184.605	0
50.85	0	182.364	0
50.9	1.06667	179.123	0
50.95	0.466667	182.794	0
51	0.933333	188.375	0
51.05	0.266667	194.179	0
51.1	0.933333	190.516	0
51.15	2.86667	193.075	1
51.2	3	191.835	1
51.25	3	189.172	1
51.3	3	203.553	1
51.35	3	210.535	1
51.4	3	210.494	1
51.45	3	217.698	1
51.5	3	223.235	1
51.55	3	227.572	1
51.6	3	222.376	1
51.65	3	226.735	1
51.7	2.53333	222.117	1
51.75	0.2	205.454	0
51.8	0.2	214.902	0
51.85	0.266667	225.506	0
51.9	0.2	225.687	0
51.95	0.333333	229.224	0
52	0.533333	225.65	0
52.05	0.866667	211.743	0
52.1	1	217.925	0
52.15	0.6	208.151	0
52.2	0.466667	208.91	0
52.25	0.666667	215.869	0
52.3	0.466667	216.251	0
52.35	0	198.566	0
52.4	1.2	210.525	0
52.45	0.866667	208.906	0
52.5	1.06667	193.266	0
52.55	0.4	190.958	0
52.6	0.466667	191.495	0
52.65	1.8	198.81	1
52.7	3	192.325	1
52.75	3	204.862	1
52.8	3	193.955	1
52.85	3	201.403	1
52.9	0.666667	189.562	0
52.95	0	192.144	0
53	0.8	186.548	0
53.05	0.2	196.818	0
53.1	0.333333	191.489	0
53.15	0	194.404	0
53.2	0.6	190.163	0
53.25	0.466667	187.611	0
53.3	0.666667	178.859	0
53.35	0.733333	183.019	0
53.4	0.266667	188.422	0
53.45	0.466667	183.693	0
53.5	0.333333	183.474	0
53.55	0.666667	185.234	0
53.6	0.6	181.06	0
53.65	0.133333	183.352	0
53.7	1.13333	178.978	0
53.75	1.06667	179.782	0
53.8	0.133333	182.83	0
53.85	0.333333	182.567	0
53.9	0.133333	182.615	0
53.95	0.466667	174.108	0
54	0.266667	177.579	0
54.05	0.8	177.738	0
54.1	1.93333	169.964	1
54.15	3	183.968	1
54.2	3	187.994	1
54.25	3	193.508	1
54.3	3	198.29	1
54.35	2.93333	204.272	1
54.4	0.2	183.12	0
54.45	0.266667	187.213	0
54.5	0.666667	193.505	0
54.55	0	201.731	0
54.6	0.733333	213.001	0
54.65	1.86667	224.694
54.7	0.533333	221.587	0
54.75	0.4	220.48	0
54.8	1.06667	219.683	0
54.85	0.2	212.154	0
54.9	0	214.024	0
54.95	1.13333	207.183	0
55	0.4	192.587	0
55.05	0	187.591	0
55.1	0	185.884	0
55.15	0.133333	185.021	0
55.2	0.4	188.558	0
55.25	0.666667	191.428	0
55.3	0.266667	190.832	0
55.35	0.4	188.013	0
55.4	0.066667	183.217	0
55.45	0.666667	188.154	0
55.5	0.133333	185.069	0
55.55	0.333333	183.229	0
55.6	0.066667	193.166	0
55.65	0.6	188.969	0
55.7	0.333333	189.551	0
55.75	0.133333	193.177	0
55.8	0.4	185.825	0
55.85	2.6	195.94	1
55.9	3	184.388	1
55.95	2.46667	184.748	1
56	2.73333	188.24	1
56.05	2.8	188.866	1
56.1	3	197.625	1
56.15	0.733333	198.918	0
56.2	0.133333	189.633	0
56.25	0	196.97	0
56.3	0.533333	192.618	0
56.35	0.066667	201.155	0
56.4	0.333333	212.359	0
56.45	1.06667	206.518	0
56.5	0	180.367	0
56.55	0.2	181.259	0
56.6	0.133333	193.374	0
56.65	0.733333	195.889	0
56.7	0.933333	201.026	0
56.75	0.266667	201.808	0
56.8	0.533333	207.723	0
56.85	0.133333	201.238	0
56.9	0.4	197.752	0
56.95	0.933333	197.445	0
57	0.4	191.182	0
57.05	0.2	191.23	0
57.1	0.466667	182.901	0
57.15	0.666667	178.616	0
57.2	1.46667	186.086	0
57.25	3	183.623	1
57.3	3	187.116	1
57.35	3	191.297	1
57.4	3	187.257	1
57.45	2.73333	194.794	1
57.5	2.33333	191.775	1
57.55	0.2	185.179	0
57.6	0.266667	197.649	0
57.65	0.666667	199.364	0
57.7	0.6	195.346	0
57.75	0.266667	195.927	0
57.8	0.066667	197.042	0
57.85	1.33333	195.891	0
57.9	0.066667	186.361	0
57.95	0.133333	188.853	0
58	0.733333	204.457	0
58.05	0.733333	196.106	0
58.1	0.533333	200.509	0
58.15	0.666667	192.491	0
58.2	2.86667	195.65	1
58.25	3	195.565	1
58.3	3	186.435	1
58.35	3	186.661	1
58.4	3	200.31	1
58.45	1.86667	192.358	1
58.5	0.6	192.717	0
58.55	0.4	181.765	0
58.6	0.4	179.236	0
58.65	0.266667	179.884	0
58.7	0.533333	179.043	0
58.75	0.466667	179.603	0
58.8	0.133333	187.895	0
58.85	0.266667	182.277	0
58.9	0.733333	188.392	0
58.95	2.73333	203.484
59	1	178.399
59.05	0.4	180.492
59.1	3	188.296	1
59.15	3	187.766	1
59.2	3	181.17	1
59.25	3	214.418	1
59.3	3	191.377	1
59.35	3	194.314	1
59.4	3	193.54	1
59.45	3	209.255	1
59.5	1.4	196.237	0
59.55	0.333333	200.507	0
59.6	0	213.155	0
59.65	0.466667	218.493	0
59.7	0.466667	234.63	0
59.75	0.266667	249.478	0
59.8	0.4	207.926	0
59.85	1	215.152	0
59.9	0.866667	233.578	0
59.95	0.666667	232.204	0
60	2.53333	217.963	1
60.05	3	201.278	1
60.1	3	210.415	1
60.15	3	197.997	1
60.2	3	307.712	1
60.25	3	303.916	1
60.3	3	258.519	1
60.35	3	211.767	1
60.4	3	221.749	1
60.45	2.26667	252.842	1
60.5	1.6	218.334	1
60.55	3	212.294	1
60.6	3	322.786	1
60.65	3	380.412	1
60.7	3	223.46	1
60.75	3	213.42	1
60.8	3	219.535	1
60.85	3	223.049	1
60.9	1	248.142
60.95	0.933333	250.679
61	0.333333	249.927
61.05	2.06667	243.665
61.1	3	230.735
61.15	3	219.339
61.2	3	219.187
61.25	3	217.457
61.3	3	309.128
61.35	3	232.598
61.4	2.86667	227.335
61.45	2.46667	277.784
61.5	1.93333	225.076
61.55	3	241.502
61.6	3	248.928
61.65	3	235.754
61.7	3	327.58
61.75	3	342.762
61.8	3	372.232
61.85	3	337.636
61.9	3	278.306
61.95	2.8	268.999
62	3	299.558
62.05	3	252.562
62.1	2.8	263.477
62.15	3	347.258
62.2	3	222.529
62.25	2.86667	271.088
62.3	3	368.536
62.35	1.66667	281.073
62.4	2.46667	233.455
62.45	3	229.725
62.5	3	343.285
62.55	3	307.733
62.6	3	332.226
62.65	2.2	221.563
62.7	0.933333	222.589
62.75	1.8	225.437
62.8	0.533333	229.685
62.85	0.4	229.578
62.9	0	212.893
62.95	3	216.119
63	3	204.945
63.05	1.8	240.593
63.1	0.6	198.241
63.15	1.2	210.445
63.2	2.4	208.337
63.25	3	314.563
63.3	3	315.812
63.35	3	264.238
63.4	1	205.952
63.45	3	259.49
63.5	3	328.604
63.55	3	312.808
63.6	3	355.879
63.65	3	285.371
63.7	3	304.931
63.75	3	213.668
63.8	3	291.471
63.85	3	278.164
63.9	3	281.99
63.95	3	268.016
64	2.86667	314.198
64.05	2.66667	283.112
64.1	3	212.561
64.15	3	320.542
64.2	2.8	230.013
64.25	3	295.95
64.3	3	325.287
64.35	3	304.446
64.4	3	250.783
64.45	3	291.32
64.5	1.8	256.813
64.55	3	258.128
64.6	3	205.509
64.65	3	309.713
64.7	3	325.117
64.75	3	297.076
64.8	3	264.547
64.85	3	324.373
64.9	2.13333	230.776
64.95	3	286.669
65	3	382.028
65.05	3	341.632
65.1	3	299.303
65.15	3	271.84
65.2	3	277.621
65.25	3	259.203
65.3	2.6	319.629
65.35	3	391.81
65.4	3	212.214
65.45	3	381.818
65.5	3	374.622
65.55	2.13333	221.425
65.6	0.133333	179.34
65.65	0.133333	177.455
65.7	0	175.481
65.75	1.6	184.04
65.8	3	224.689
65.85	3	225.759
65.9	3	311.318
65.95	3	293.344
66	3	331.259
66.05	3	342.663
66.1	3	352.156
66.15	3	340.981
66.2	3	306.852
66.25	3	210.167
66.3	3	299.704
66.35	3	210.463
66.4	3	342.067
66.45	3	294.537
66.5	3	277.675
66.55	3	364.456
66.6	3	288.549
66.65	3	386.819
66.7	1.2	205.134
66.75	0.2	212.693
66.8	0.2	206.408
66.85	2.46667	210.856
66.9	3	213.393
66.95	3	383.064
67	3	255.468
67.05	3	290.738
67.1	3	317.297
67.15	3	336.435
67.2	3	265.127
67.25	3	326.464
67.3	3	334.512
67.35	3	239.939
67.4	3	259.387
67.45	3	260.301
67.5	3	205.594
67.55	3	232.331
67.6	3	271.446
67.65	3	350.761
67.7	3	386.498
67.75	3	204.435
67.8	2.8	213.439
67.85	0.066667	220.154
67.9	0.066667	208.358
67.95	0.2	188.384
68	0.466667	181.054
68.05	3	199.702	1
68.1	3	239.662	1
68.15	3	233.488	1
68.2	3	217.336	1
68.25	3	333.117	1
68.3	3	327.966	1
68.35	3	246.036	1
68.4	0.2	166.751	0
68.45	0.266667	182.266	0
68.5	0.066667	199.225	0
68.55	0	193.718	0
68.6	0.533333	178.299	0
68.65	0.266667	200.792	0
68.7	0.066667	197.773	0
68.75	0.2	195.91	0
68.8	0.266667	195.092	0
68.85	1.93333	197.696	1
68.9	3	183.388	1
68.95	3	185.57	1
69	3	176.64	1
69.05	2.33333	182.377	1
69.1	0.266667	180.337
69.15	0.133333	163.829
69.2	2.06667	182.122
69.25	3	164.748
69.3	3	165.53
69.35	3	237.644
69.4	3	257.004
69.45	3	264.052
69.5	0.4	164.478
69.55	0.266667	164.704
69.6	0.2	167.508
69.65	0.8	174.534
69.7	3	207.071	1
69.75	3	206.03	1
69.8	3	215.789	1
69.85	3	207.06	1
69.9	3	214.286	1
69.95	3	315.49	1
70	3	265.227	1
70.05	3	200.919	1
70.1	3	243.768	1
70.15	3	346.305	1
70.2	3	223.019	1
70.25	3	225.223	1
70.3	2.86667	210.471	1
70.35	2.86667	235.431	1
70.4	0.6	223.39	0
70.45	0.066667	224.194	0
70.5	0	225.487	0
70.55	0.6	195.713	0
70.6	0.066667	190.094	0
70.65	0.266667	201.276	0
70.7	0.2	229.613	0
70.75	0.133333	225.905	0
70.8	2.46667	214.465
70.85	1.26667	193.868
70.9	0.2	186.828
70.95	0.666667	183.743
71	0.133333	185.613
71.05	0.466667	179.817
71.1	2.73333	165.265
71.15	0.066667	161.824
71.2	0.133333	161.761
71.25	0.266667	159.099
71.3	0.2	162.636
71.35	0.533333	155.506
71.4	2.13333	163.577
71.45	0.866667	164.78
71.5	2.33333	161.139
71.55	3	156.277
71.6	3	205.725
71.65	3	242.218
71.7	3	211.51
71.75	3	245.447
71.8	3	187.518
71.85	3	186.699
71.9	2.66667	199.814
71.95	1.06667	198.885
72	0.266667	217.199

## Sheet: Fig1C-transitions
Periphery													Central
	wake to sleep					sleep to wake								wake to sleep						sleep to wake
	1MS114rc	2MP82rc	3MP71	3MS113	3MP53	1MS114rc	2MP82rc	3MP71	3MS113	3MP53				A3987rc	A7841rc	A8424rc	A9521rc	A9522rc	A8425	A3987rc	A7841rc	A8424rc	A9521rc	A9522rc	A8425
-28.5	96.1496	89.0239	85.9036	91.6549	82.7537	117.22	107.51	106.79	108.856	121.823			-28.5	103.631	95.6114	99.4341	97.7481	76.8954	95.7367	101.969	104.595	100.234	104.525	101.478	113.009
-25.5	95.4089	89.9275	89.2657	90.0732	84.7141	116.72	107.639	105.781	110.974	115.548			-25.5	99.6058	92.5539	97.3238	96.4638	84.0302	100.565	102.529	103.89	100.285	104.377	102.916	109.953
-22.5	95.2214	90.9108	91.793	89.9277	86.5139	112.35	108.723	105.631	110.083	113.034			-22.5	106.71	94.9979	97.0143	98.5416	94.0418	101.694	103.262	102.078	99.8578	100.665	104.645	103.823
-19.5	90.0934	91.4121	91.403	89.8784	88.117	111.14	108.514	106.111	109.182	111.437			-19.5	110.913	95.997	99.6215	99.4327	92.9639	102.165	105	104.774	101.717	101.536	106.525	100.902
-16.5	88.0295	91.8826	91.3117	91.2469	90.3964	108.118	107.88	103.202	108.522	109.734			-16.5	102.933	99.3798	100.468	98.9542	92.9222	99.6789	104.606	101.602	100.064	100.55	103.873	102.412
-13.5	89.5138	92.5796	92.5862	94.2391	90.7752	106.653	106.536	102.753	107.76	113.301			-13.5	103.27	102.836	100.965	99.5734	94.8092	105.05	103.267	100.124	99.8207	101.819	103.855	102.566
-10.5	90.3685	92.2921	93.675	94.1801	89.7931	107.959	105.327	102.786	106.68	111.33			-10.5	105.738	103.392	100.732	99.8355	97.5618	103.823	102.59	100.189	100.032	100.601	102.47	102.258
-7.5	93.9193	93.8195	94.4183	97.0129	89.6475	104.384	105.692	103.629	106.036	108.855			-7.5	104.138	104.575	98.9087	100.482	99.8869	110.137	101.929	100.26	100.253	101.497	101.027	97.8402
-4.5	96.2736	95.2571	94.6885	95.7806	91.3366	104.829	104.728	102.799	104.881	105.324			-4.5	103.64	103.41	100.852	100.927	99.1345	112.043	100.405	99.9046	101.579	100.765	100.057	95.7006
-1.5	94.4254	98.2532	98.327	97.5537	96.1084	101.95	103.297	101.921	102.126	103.48			-1.5	102.704	102.448	100.367	101.383	100.311	104.545	97.3765	98.4521	100.032	100.479	99.0611	93.2571
1.5	105.575	101.747	101.673	102.446	103.892	98.0498	96.7027	98.0794	97.874	96.5206			1.5	97.2959	97.5524	99.6328	98.6168	99.6895	95.4553	102.624	101.548	99.9676	99.5208	100.939	106.743
4.5	113.778	100.981	99.9761	101.033	101.844	85.3564	94.4807	98.6524	97.6289	90.8811			4.5	97.2885	97.2064	99.562	99.1093	99.9958	93.7082	103.231	102.553	98.9085	100.854	100.12	108.008
7.5	114.512	101.141	99.3202	97.8133	99.7723	83.1717	96.3907	100.39	103.311	94.6114			7.5	98.6636	97.1067	99.2997	100.111	99.5838	94.301	108.761	100.923	100.398	101.581	99.7899	106.775
10.5	109.765	100.497	97.1401	95.7354	97.5691	87.1273	100.268	102.706	108.747	103.555			10.5	97.4917	98.1584	99.3658	99.0422	101.456	103.197	116.236	101.546	101.406	100.471	101.703	108.681
13.5	106.694	99.5566	94.2083	91.8179	94.0433	89.5458	106.396	105.047	117.912	120.051			13.5	96.3044	98.372	100.12	98.0349	99.2951	104.704	124.084	102.906	99.8254	101.44	103.405	112.667
16.5	97.6732	97.6031	92.7073	89.7938	90.8794	96.1387	113.761	106.029	120.096	126.423			16.5	99.1242	96.6706	100.523	98.9417	98.6869	103.645	127.757	106.918	100.31	103.219	106.762	113.657
19.5	93.6579	98.1454	90.6669	87.9879	89.1339	113.334	115.964	109.118	121.259	135.042			19.5	98.2114	95.0487	98.4363	97.5605	98.9782	105.084	127.716	107.81	102.455	104.921	106.612	115.425
22.5	88.893	97.2187	89.5425	87.1663	84.0896	120.817	116.195	106.839	119.474	140.146			22.5	96.1621	94.8901	98.9723	98.9254	97.7949	101.416	128.716	107.581	101.866	108.038	107.325	119.555
25.5	85.8323	95.79	87.8178	85.9136	80.2548	130.199	110.766	107.407	119.142	141.497			25.5	93.1439	95.0905	97.9245	97.7316	95.6429	99.5651	134.938	115.332	106.197	108.773	107.114	125.398
28.5	82.6724	94.3184	88.1968	87.1205	75.9045	127.89	113.207	113.212	122.115	140.66			28.5	93.923	93.0302	98.7233	96.6933	94.1882	99.3582	133.321	115.178	106.622	109.632	109.041	143.895
31.5	80.9969	94.5578	87.7817	84.3914	71.972	133.045	115.77	108.374	123.156	138.148			31.5	90.7289	94.9888	98.2371	96.7638	92.2596	98.6867	122.662	113.763	104.234	109.975	108.547	143.076
34.5	75.4327	93.4308	86.9125	83.2752	70.0883	139.732	117.008	106.206	122.765	135.444			34.5	91.4857	92.7295	98.5007	96.0809	90.8893	99.1334	133.196	116.587	113.326	110.518	106.664	143.311
37.5	73.888	92.9187	85.0384	83.6422	70.3735	134.328	116.738	110.078	117.35	138.853			37.5	91.6292	91.9803	97.683	97.456	90.5178	97.1425	130.826	112.902	107.643	109.766	107.742	149.508
40.5	73.5864	91.5627	84.3141	78.8872	69.1285	130.889	117.209	101.404	120.976	137.804			40.5	91.2381	93.3443	97.7654	94.4439	85.8894	92.5371
43.5	72.627	90.7715	84.64	79.6321	68.6415	133.059	117.326	98.7352	123.599	139.983			43.5	90.3813	91.2314	97.6046	95.1542	85.2354	89.7449
46.5	73.1329	89.8672	84.8103	78.8383	65.5543	123.449	118.008	104.667	116.604	132.239			46.5	89.6651	91.1804	96.4918	93.538	81.1754	92.5647
49.5	71.8338	90.8852	84.8218	81.352	63.3084	107.604	112.123	103.253	115.201	115.598			49.5	87.7845	91.2818	96.5323	93.3498	80.9191	89.4421
52.5	71.3662	90.7442	83.4911	82.7454	63.1843	111.015	113.497	115.13	116.229	105.462			52.5	88.1465	90.4488	96.0956	95.17	75.3514	93.4404
55.5	72.3413	89.3102	81.1637	86.5815	68.739	113.002	119.005	99.469	112.591	141.326			55.5	90.4741	90.2807	96.4624	94.8988	72.8451	90.4286
58.5	71.3929	89.056	81.4913	88.6938	73.7944								58.5	90.7356	88.115	97.7995	95.2952	71.9793	91.7723
61.5	68.2884	88.644	88.494	88.379	82.1674								61.5	88.4701	93.2801	96.1315	91.5552	86.1729	82.2051
64.5	64.594	90.2127	85.4174	85.8457	100.253
67.5	63.238	89.5613	86.996	87.6566	99.1095
70.5	67.952	89.9671	86.999	90.6578	100.589
73.5	65.5859	92.0335	81.2856	88.2714	89.1803
