# Supplementary material for: The sleep-wake distribution contributes to the peripheral rhythms in PERIOD-2
Source: eLife. 2021 Dec 13;10:e69773. doi: 10.7554/eLife.69773 (PMC8798053; doi:10.7554/eLife.69773)
Supplement: Figure 2—figure supplement 1—source data 1. [file elife-69773-fig2-figsupp1-data1.xlsx]

## Sheet: A
A9737							A9740
2018-04-24	00:00:00						2018-04-25	00:00:00
14	0	0	0	0			Day	Hr	Min	Cnts/min	Lights
14	0	1	0	0			14	0	0	0	0
14	0	2	0	0			14	0	1	0	0
14	0	3	0	0			14	0	2	0	0
14	0	4	0	0			14	0	3	0	0
14	0	5	0	0			14	0	4	0	0
14	0	6	0	0			14	0	5	0	0
14	0	7	0	0			14	0	6	0	0
14	0	8	0	0			14	0	7	0	0
14	0	9	0	0			14	0	8	0	0
14	0	10	0	0			14	0	9	0	0
14	0	11	0	0			14	0	10	0	0
14	0	12	0	0			14	0	11	0	0
14	0	13	0	0			14	0	12	0	0
14	0	14	0	0			14	0	13	0	0
14	0	15	0	0			14	0	14	0	0
14	0	16	0	0			14	0	15	0	0
14	0	17	0	0			14	0	16	0	0
14	0	18	0	0			14	0	17	0	0
14	0	19	0	0			14	0	18	0	0
14	0	20	0	0			14	0	19	0	0
14	0	21	0	0			14	0	20	0	0
14	0	22	0	0			14	0	21	0	0
14	0	23	0	0			14	0	22	0	0
14	0	24	0	0			14	0	23	0	0
14	0	25	0	0			14	0	24	0	0
14	0	26	0	0			14	0	25	0	0
14	0	27	0	0			14	0	26	0	0
14	0	28	0	0			14	0	27	0	0
14	0	29	0	0			14	0	28	0	0
14	0	30	0	0			14	0	29	0	0
14	0	31	0	0			14	0	30	0	0
14	0	32	0	0			14	0	31	0	0
14	0	33	0	0			14	0	32	0	0
14	0	34	0	0			14	0	33	0	0
14	0	35	0	0			14	0	34	0	0
14	0	36	0	0			14	0	35	0	0
14	0	37	0	0			14	0	36	0	0
14	0	38	0	0			14	0	37	0	0
14	0	39	0	0			14	0	38	0	0
14	0	40	0	0			14	0	39	0	0
14	0	41	0	0			14	0	40	0	0
14	0	42	0	0			14	0	41	0	0
14	0	43	0	0			14	0	42	0	0
14	0	44	0	0			14	0	43	0	0
14	0	45	0	0			14	0	44	0	0
14	0	46	0	0			14	0	45	0	0
14	0	47	0	0			14	0	46	0	0
14	0	48	0	0			14	0	47	0	0
14	0	49	0	0			14	0	48	0	0
14	0	50	0	0			14	0	49	0	0
14	0	51	0	0			14	0	50	0	0
14	0	52	0	0			14	0	51	0	0
14	0	53	0	0			14	0	52	0	0
14	0	54	0	0			14	0	53	0	0
14	0	55	0	0			14	0	54	0	0
14	0	56	0	0			14	0	55	0	0
14	0	57	0	0			14	0	56	0	0
14	0	58	0	0			14	0	57	0	0
14	0	59	0	0			14	0	58	0	0
14	1	0	0	0			14	0	59	0	0
14	1	1	0	0			14	1	0	0	0
14	1	2	0	0			14	1	1	0	0
14	1	3	0	0			14	1	2	0	0
14	1	4	0	0			14	1	3	0	0
14	1	5	0	0			14	1	4	0	0
14	1	6	0	0			14	1	5	0	0
14	1	7	0	0			14	1	6	0	0
14	1	8	0	0			14	1	7	0	0
14	1	9	0	0			14	1	8	0	0
14	1	10	0	0			14	1	9	0	0
14	1	11	0	0			14	1	10	0	0
14	1	12	0	0			14	1	11	0	0
14	1	13	0	0			14	1	12	0	0
14	1	14	0	0			14	1	13	0	0
14	1	15	0	0			14	1	14	0	0
14	1	16	0	0			14	1	15	0	0
14	1	17	0	0			14	1	16	0	0
14	1	18	0	0			14	1	17	0	0
14	1	19	0	0			14	1	18	0	0
14	1	20	0	0			14	1	19	0	0
14	1	21	0	0			14	1	20	0	0
14	1	22	0	0			14	1	21	0	0
14	1	23	0	0			14	1	22	0	0
14	1	24	0	0			14	1	23	0	0
14	1	25	0	0			14	1	24	0	0
14	1	26	0	0			14	1	25	0	0
14	1	27	0	0			14	1	26	0	0
14	1	28	0	0			14	1	27	0	0
14	1	29	0	0			14	1	28	0	0
14	1	30	0	0			14	1	29	0	0
14	1	31	0	0			14	1	30	0	0
14	1	32	0	0			14	1	31	0	0
14	1	33	0	0			14	1	32	0	0
14	1	34	0	0			14	1	33	0	0
14	1	35	0	0			14	1	34	0	0
14	1	36	0	0			14	1	35	0	0
14	1	37	0	0			14	1	36	0	0
14	1	38	0	0			14	1	37	0	0
14	1	39	0	0			14	1	38	0	0
14	1	40	0	0			14	1	39	0	0
14	1	41	0	0			14	1	40	0	0
14	1	42	0	0			14	1	41	0	0
14	1	43	0	0			14	1	42	0	0
14	1	44	0	0			14	1	43	0	0
14	1	45	0	0			14	1	44	0	0
14	1	46	0	0			14	1	45	0	0
14	1	47	0	0			14	1	46	0	0
14	1	48	0	0			14	1	47	0	0
14	1	49	0	0			14	1	48	0	0
14	1	50	0	0			14	1	49	0	0
14	1	51	0	0			14	1	50	0	0
14	1	52	0	0			14	1	51	0	0
14	1	53	0	0			14	1	52	0	0
14	1	54	0	0			14	1	53	0	0
14	1	55	0	0			14	1	54	0	0
14	1	56	0	0			14	1	55	0	0
14	1	57	0	0			14	1	56	0	0
14	1	58	0	0			14	1	57	0	0
14	1	59	0	0			14	1	58	0	0
14	2	0	0	0			14	1	59	0	0
14	2	1	0	0			14	2	0	0	0
14	2	2	0	0			14	2	1	0	0
14	2	3	0	0			14	2	2	0	0
14	2	4	0	0			14	2	3	0	0
14	2	5	0	0			14	2	4	0	0
14	2	6	0	0			14	2	5	0	0
14	2	7	0	0			14	2	6	0	0
14	2	8	0	0			14	2	7	0	0
14	2	9	0	0			14	2	8	0	0
14	2	10	0	0			14	2	9	0	0
14	2	11	0	0			14	2	10	0	0
14	2	12	0	0			14	2	11	0	0
14	2	13	0	0			14	2	12	0	0
14	2	14	0	0			14	2	13	0	0
14	2	15	0	0			14	2	14	0	0
14	2	16	0	0			14	2	15	0	0
14	2	17	0	0			14	2	16	0	0
14	2	18	0	0			14	2	17	0	0
14	2	19	0	0			14	2	18	0	0
14	2	20	0	0			14	2	19	0	0
14	2	21	0	0			14	2	20	0	0
14	2	22	0	0			14	2	21	0	0
14	2	23	0	0			14	2	22	0	0
14	2	24	0	0			14	2	23	0	0
14	2	25	0	0			14	2	24	0	0
14	2	26	0	0			14	2	25	0	0
14	2	27	0	0			14	2	26	0	0
14	2	28	0	0			14	2	27	0	0
14	2	29	0	0			14	2	28	0	0
14	2	30	0	0			14	2	29	0	0
14	2	31	0	0			14	2	30	0	0
14	2	32	0	0			14	2	31	0	0
14	2	33	0	0			14	2	32	0	0
14	2	34	0	0			14	2	33	0	0
14	2	35	0	0			14	2	34	0	0
14	2	36	0	0			14	2	35	0	0
14	2	37	0	0			14	2	36	0	0
14	2	38	0	0			14	2	37	0	0
14	2	39	0	0			14	2	38	0	0
14	2	40	0	0			14	2	39	0	0
14	2	41	0	0			14	2	40	0	0
14	2	42	0	0			14	2	41	0	0
14	2	43	0	0			14	2	42	0	0
14	2	44	0	0			14	2	43	0	0
14	2	45	0	0			14	2	44	0	0
14	2	46	0	0			14	2	45	0	0
14	2	47	0	0			14	2	46	0	0
14	2	48	0	0			14	2	47	0	0
14	2	49	0	0			14	2	48	0	0
14	2	50	0	0			14	2	49	0	0
14	2	51	0	0			14	2	50	0	0
14	2	52	0	0			14	2	51	0	0
14	2	53	0	0			14	2	52	0	0
14	2	54	0	0			14	2	53	0	0
14	2	55	0	0			14	2	54	0	0
14	2	56	0	0			14	2	55	0	0
14	2	57	0	0			14	2	56	0	0
14	2	58	0	0			14	2	57	0	0
14	2	59	0	0			14	2	58	0	0
14	3	0	0	0			14	2	59	0	0
14	3	1	0	0			14	3	0	0	0
14	3	2	0	0			14	3	1	0	0
14	3	3	0	0			14	3	2	0	0
14	3	4	0	0			14	3	3	0	0
14	3	5	0	0			14	3	4	0	0
14	3	6	0	0			14	3	5	0	0
14	3	7	0	0			14	3	6	0	0
14	3	8	0	0			14	3	7	0	0
14	3	9	0	0			14	3	8	0	0
14	3	10	0	0			14	3	9	0	0
14	3	11	0	0			14	3	10	0	0
14	3	12	0	0			14	3	11	0	0
14	3	13	0	0			14	3	12	0	0
14	3	14	0	0			14	3	13	0	0
14	3	15	0	0			14	3	14	0	0
14	3	16	0	0			14	3	15	0	0
14	3	17	0	0			14	3	16	0	0
14	3	18	0	0			14	3	17	0	0
14	3	19	0	0			14	3	18	0	0
14	3	20	0	0			14	3	19	0	0
14	3	21	0	0			14	3	20	0	0
14	3	22	0	0			14	3	21	0	0
14	3	23	0	0			14	3	22	0	0
14	3	24	0	0			14	3	23	0	0
14	3	25	0	0			14	3	24	0	0
14	3	26	0	0			14	3	25	0	0
14	3	27	0	0			14	3	26	0	0
14	3	28	0	0			14	3	27	0	0
14	3	29	0	0			14	3	28	0	0
14	3	30	0	0			14	3	29	0	0
14	3	31	0	0			14	3	30	0	0
14	3	32	0	0			14	3	31	0	0
14	3	33	0	0			14	3	32	0	0
14	3	34	0	0			14	3	33	0	0
14	3	35	0	0			14	3	34	0	0
14	3	36	0	0			14	3	35	0	0
14	3	37	0	0			14	3	36	0	0
14	3	38	0	0			14	3	37	0	0
14	3	39	0	0			14	3	38	0	0
14	3	40	0	0			14	3	39	0	0
14	3	41	0	0			14	3	40	0	0
14	3	42	0	0			14	3	41	0	0
14	3	43	0	0			14	3	42	0	0
14	3	44	0	0			14	3	43	0	0
14	3	45	0	0			14	3	44	0	0
14	3	46	0	0			14	3	45	0	0
14	3	47	0	0			14	3	46	0	0
14	3	48	0	0			14	3	47	0	0
14	3	49	0	0			14	3	48	0	0
14	3	50	0	0			14	3	49	0	0
14	3	51	0	0			14	3	50	0	0
14	3	52	0	0			14	3	51	0	0
14	3	53	0	0			14	3	52	0	0
14	3	54	0	0			14	3	53	0	0
14	3	55	0	0			14	3	54	0	0
14	3	56	0	0			14	3	55	0	0
14	3	57	0	0			14	3	56	0	0
14	3	58	0	0			14	3	57	0	0
14	3	59	0	0			14	3	58	0	0
14	4	0	0	0			14	3	59	0	0
14	4	1	0	0			14	4	0	0	0
14	4	2	0	0			14	4	1	0	0
14	4	3	0	0			14	4	2	0	0
14	4	4	0	0			14	4	3	0	0
14	4	5	0	0			14	4	4	0	0
14	4	6	0	0			14	4	5	0	0
14	4	7	0	0			14	4	6	0	0
14	4	8	0	0			14	4	7	0	0
14	4	9	0	0			14	4	8	0	0
14	4	10	0	0			14	4	9	0	0
14	4	11	0	0			14	4	10	0	0
14	4	12	0	0			14	4	11	0	0
14	4	13	0	0			14	4	12	0	0
14	4	14	0	0			14	4	13	0	0
14	4	15	0	0			14	4	14	0	0
14	4	16	0	0			14	4	15	0	0
14	4	17	0	0			14	4	16	0	0
14	4	18	0	0			14	4	17	0	0
14	4	19	0	0			14	4	18	0	0
14	4	20	0	0			14	4	19	0	0
14	4	21	0	0			14	4	20	0	0
14	4	22	0	0			14	4	21	0	0
14	4	23	0	0			14	4	22	0	0
14	4	24	0	0			14	4	23	0	0
14	4	25	0	0			14	4	24	0	0
14	4	26	0	0			14	4	25	0	0
14	4	27	0	0			14	4	26	0	0
14	4	28	0	0			14	4	27	0	0
14	4	29	0	0			14	4	28	0	0
14	4	30	0	0			14	4	29	0	0
14	4	31	0	0			14	4	30	0	0
14	4	32	0	0			14	4	31	0	0
14	4	33	0	0			14	4	32	0	0
14	4	34	0	0			14	4	33	0	0
14	4	35	0	0			14	4	34	0	0
14	4	36	0	0			14	4	35	0	0
14	4	37	0	0			14	4	36	0	0
14	4	38	0	0			14	4	37	0	0
14	4	39	0	0			14	4	38	0	0
14	4	40	0	0			14	4	39	0	0
14	4	41	0	0			14	4	40	0	0
14	4	42	0	0			14	4	41	0	0
14	4	43	0	0			14	4	42	0	0
14	4	44	0	0			14	4	43	0	0
14	4	45	0	0			14	4	44	0	0
14	4	46	0	0			14	4	45	0	0
14	4	47	0	0			14	4	46	0	0
14	4	48	0	0			14	4	47	0	0
14	4	49	0	0			14	4	48	0	0
14	4	50	0	0			14	4	49	0	0
14	4	51	0	0			14	4	50	0	0
14	4	52	0	0			14	4	51	0	0
14	4	53	0	0			14	4	52	0	0
14	4	54	0	0			14	4	53	0	0
14	4	55	0	0			14	4	54	0	0
14	4	56	0	0			14	4	55	0	0
14	4	57	0	0			14	4	56	0	0
14	4	58	0	0			14	4	57	0	0
14	4	59	0	0			14	4	58	0	0
14	5	0	0	0			14	4	59	0	0
14	5	1	0	0			14	5	0	0	0
14	5	2	0	0			14	5	1	0	0
14	5	3	0	0			14	5	2	0	0
14	5	4	0	0			14	5	3	0	0
14	5	5	0	0			14	5	4	0	0
14	5	6	0	0			14	5	5	0	0
14	5	7	0	0			14	5	6	0	0
14	5	8	0	0			14	5	7	0	0
14	5	9	0	0			14	5	8	0	0
14	5	10	0	0			14	5	9	0	0
14	5	11	0	0			14	5	10	0	0
14	5	12	0	0			14	5	11	0	0
14	5	13	0	0			14	5	12	0	0
14	5	14	0	0			14	5	13	0	0
14	5	15	0	0			14	5	14	0	0
14	5	16	0	0			14	5	15	0	0
14	5	17	0	0			14	5	16	0	0
14	5	18	0	0			14	5	17	0	0
14	5	19	0	0			14	5	18	0	0
14	5	20	0	0			14	5	19	0	0
14	5	21	0	0			14	5	20	0	0
14	5	22	0	0			14	5	21	0	0
14	5	23	0	0			14	5	22	0	0
14	5	24	0	0			14	5	23	0	0
14	5	25	0	0			14	5	24	0	0
14	5	26	0	0			14	5	25	0	0
14	5	27	0	0			14	5	26	0	0
14	5	28	0	0			14	5	27	0	0
14	5	29	0	0			14	5	28	0	0
14	5	30	0	0			14	5	29	0	0
14	5	31	0	0			14	5	30	0	0
14	5	32	0	0			14	5	31	0	0
14	5	33	0	0			14	5	32	0	0
14	5	34	0	0			14	5	33	0	0
14	5	35	0	0			14	5	34	0	0
14	5	36	0	0			14	5	35	0	0
14	5	37	0	0			14	5	36	0	0
14	5	38	0	0			14	5	37	0	0
14	5	39	0	0			14	5	38	0	0
14	5	40	0	0			14	5	39	0	0
14	5	41	0	0			14	5	40	0	0
14	5	42	0	0			14	5	41	0	0
14	5	43	0	0			14	5	42	0	0
14	5	44	0	0			14	5	43	0	0
14	5	45	0	0			14	5	44	0	0
14	5	46	0	0			14	5	45	0	0
14	5	47	0	0			14	5	46	0	0
14	5	48	0	0			14	5	47	0	0
14	5	49	0	0			14	5	48	0	0
14	5	50	0	0			14	5	49	0	0
14	5	51	0	0			14	5	50	0	0
14	5	52	0	0			14	5	51	0	0
14	5	53	0	0			14	5	52	0	0
14	5	54	0	0			14	5	53	0	0
14	5	55	0	0			14	5	54	0	0
14	5	56	0	0			14	5	55	0	0
14	5	57	0	0			14	5	56	0	0
14	5	58	0	0			14	5	57	0	0
14	5	59	0	0			14	5	58	0	0
14	6	0	0	0			14	5	59	0	0
14	6	1	0	0			14	6	0	0	0
14	6	2	0	0			14	6	1	0	0
14	6	3	0	0			14	6	2	0	0
14	6	4	0	0			14	6	3	0	0
14	6	5	0	0			14	6	4	0	0
14	6	6	0	0			14	6	5	0	0
14	6	7	0	0			14	6	6	0	0
14	6	8	0	0			14	6	7	0	0
14	6	9	0	0			14	6	8	0	0
14	6	10	0	0			14	6	9	0	0
14	6	11	0	0			14	6	10	0	0
14	6	12	0	0			14	6	11	0	0
14	6	13	0	0			14	6	12	0	0
14	6	14	0	0			14	6	13	0	0
14	6	15	0	0			14	6	14	0	0
14	6	16	0	0			14	6	15	0	0
14	6	17	0	0			14	6	16	0	0
14	6	18	0	0			14	6	17	0	0
14	6	19	0	0			14	6	18	0	0
14	6	20	0	0			14	6	19	0	0
14	6	21	0	0			14	6	20	0	0
14	6	22	0	0			14	6	21	0	0
14	6	23	0	0			14	6	22	0	0
14	6	24	0	0			14	6	23	0	0
14	6	25	0	0			14	6	24	0	0
14	6	26	0	0			14	6	25	0	0
14	6	27	0	0			14	6	26	0	0
14	6	28	0	0			14	6	27	0	0
14	6	29	0	0			14	6	28	0	0
14	6	30	0	0			14	6	29	0	0
14	6	31	0	0			14	6	30	0	0
14	6	32	0	0			14	6	31	0	0
14	6	33	0	0			14	6	32	0	0
14	6	34	0	0			14	6	33	0	0
14	6	35	0	0			14	6	34	0	0
14	6	36	0	0			14	6	35	0	0
14	6	37	0	0			14	6	36	0	0
14	6	38	0	0			14	6	37	0	0
14	6	39	0	0			14	6	38	0	0
14	6	40	0	0			14	6	39	0	0
14	6	41	0	0			14	6	40	0	0
14	6	42	0	0			14	6	41	0	0
14	6	43	0	0			14	6	42	0	0
14	6	44	0	0			14	6	43	0	0
14	6	45	0	0			14	6	44	0	0
14	6	46	0	0			14	6	45	0	0
14	6	47	0	0			14	6	46	0	0
14	6	48	0	0			14	6	47	0	0
14	6	49	0	0			14	6	48	0	0
14	6	50	0	0			14	6	49	0	0
14	6	51	0	0			14	6	50	0	0
14	6	52	0	0			14	6	51	0	0
14	6	53	0	0			14	6	52	0	0
14	6	54	0	0			14	6	53	0	0
14	6	55	0	0			14	6	54	0	0
14	6	56	0	0			14	6	55	0	0
14	6	57	0	0			14	6	56	0	0
14	6	58	0	0			14	6	57	0	0
14	6	59	0	0			14	6	58	0	0
14	7	0	0	0			14	6	59	0	0
14	7	1	0	0			14	7	0	0	0
14	7	2	0	0			14	7	1	0	0
14	7	3	0	0			14	7	2	0	0
14	7	4	0	0			14	7	3	0	0
14	7	5	0	0			14	7	4	0	0
14	7	6	0	0			14	7	5	0	0
14	7	7	0	0			14	7	6	0	0
14	7	8	0	0			14	7	7	0	0
14	7	9	0	0			14	7	8	0	0
14	7	10	0	0			14	7	9	0	0
14	7	11	0	0			14	7	10	0	0
14	7	12	0	0			14	7	11	0	0
14	7	13	0	0			14	7	12	0	0
14	7	14	0	0			14	7	13	0	0
14	7	15	0	0			14	7	14	0	0
14	7	16	0	0			14	7	15	0	0
14	7	17	0	0			14	7	16	0	0
14	7	18	0	0			14	7	17	0	0
14	7	19	0	0			14	7	18	0	0
14	7	20	0	0			14	7	19	0	0
14	7	21	0	0			14	7	20	0	0
14	7	22	0	0			14	7	21	0	0
14	7	23	0	0			14	7	22	0	0
14	7	24	0	0			14	7	23	0	0
14	7	25	0	0			14	7	24	0	0
14	7	26	0	0			14	7	25	0	0
14	7	27	0	0			14	7	26	0	0
14	7	28	0	0			14	7	27	0	0
14	7	29	0	0			14	7	28	0	0
14	7	30	0	0			14	7	29	0	0
14	7	31	0	0			14	7	30	0	0
14	7	32	0	0			14	7	31	0	0
14	7	33	0	0			14	7	32	0	0
14	7	34	0	0			14	7	33	0	0
14	7	35	0	0			14	7	34	0	0
14	7	36	0	0			14	7	35	0	0
14	7	37	0	0			14	7	36	0	0
14	7	38	0	0			14	7	37	0	0
14	7	39	0	0			14	7	38	0	0
14	7	40	0	0			14	7	39	0	0
14	7	41	0	0			14	7	40	0	0
14	7	42	0	0			14	7	41	0	0
14	7	43	0	0			14	7	42	0	0
14	7	44	0	0			14	7	43	0	0
14	7	45	0	0			14	7	44	0	0
14	7	46	0	0			14	7	45	0	0
14	7	47	0	0			14	7	46	0	0
14	7	48	0	0			14	7	47	0	0
14	7	49	0	0			14	7	48	0	0
14	7	50	0	0			14	7	49	0	0
14	7	51	0	0			14	7	50	0	0
14	7	52	0	0			14	7	51	0	0
14	7	53	0	0			14	7	52	0	0
14	7	54	0	0			14	7	53	0	0
14	7	55	0	0			14	7	54	0	0
14	7	56	0	0			14	7	55	0	0
14	7	57	0	0			14	7	56	0	0
14	7	58	0	0			14	7	57	0	0
14	7	59	0	0			14	7	58	0	0
14	8	0	0	0			14	7	59	0	0
14	8	1	0	0			14	8	0	0	0
14	8	2	0	0			14	8	1	0	0
14	8	3	0	0			14	8	2	0	0
14	8	4	0	0			14	8	3	0	0
14	8	5	0	0			14	8	4	0	0
14	8	6	0	0			14	8	5	0	0
14	8	7	0	0			14	8	6	0	0
14	8	8	0	0			14	8	7	0	0
14	8	9	0	0			14	8	8	0	0
14	8	10	0	0			14	8	9	0	0
14	8	11	0	0			14	8	10	0	0
14	8	12	0	0			14	8	11	0	0
14	8	13	0	0			14	8	12	0	0
14	8	14	0	0			14	8	13	0	0
14	8	15	0	0			14	8	14	0	0
14	8	16	0	0			14	8	15	0	0
14	8	17	0	0			14	8	16	0	0
14	8	18	0	0			14	8	17	0	0
14	8	19	0	0			14	8	18	0	0
14	8	20	0	0			14	8	19	0	0
14	8	21	0	0			14	8	20	0	0
14	8	22	0	0			14	8	21	0	0
14	8	23	0	0			14	8	22	0	0
14	8	24	0	0			14	8	23	0	0
14	8	25	0	0			14	8	24	0	0
14	8	26	0	0			14	8	25	0	0
14	8	27	0	0			14	8	26	0	0
14	8	28	0	0			14	8	27	0	0
14	8	29	0	0			14	8	28	0	0
14	8	30	0	0			14	8	29	0	0
14	8	31	0	0			14	8	30	0	0
14	8	32	0	0			14	8	31	0	0
14	8	33	0	0			14	8	32	0	0
14	8	34	0	0			14	8	33	0	0
14	8	35	0	0			14	8	34	0	0
14	8	36	0	0			14	8	35	0	0
14	8	37	0	0			14	8	36	0	0
14	8	38	0	0			14	8	37	0	0
14	8	39	0	0			14	8	38	0	0
14	8	40	0	0			14	8	39	0	0
14	8	41	0	0			14	8	40	0	0
14	8	42	0	0			14	8	41	0	0
14	8	43	0	0			14	8	42	0	0
14	8	44	0	0			14	8	43	0	0
14	8	45	0	0			14	8	44	0	0
14	8	46	0	0			14	8	45	0	0
14	8	47	0	0			14	8	46	0	0
14	8	48	0	0			14	8	47	0	0
14	8	49	0	0			14	8	48	0	0
14	8	50	0	0			14	8	49	0	0
14	8	51	0	0			14	8	50	0	0
14	8	52	0	0			14	8	51	0	0
14	8	53	0	0			14	8	52	0	0
14	8	54	0	0			14	8	53	0	0
14	8	55	0	0			14	8	54	0	0
14	8	56	0	0			14	8	55	0	0
14	8	57	0	0			14	8	56	0	0
14	8	58	0	0			14	8	57	0	0
14	8	59	0	0			14	8	58	0	0
14	9	0	0	0			14	8	59	0	0
14	9	1	0	0			14	9	0	0	0
14	9	2	0	0			14	9	1	0	0
14	9	3	0	0			14	9	2	0	0
14	9	4	0	0			14	9	3	0	0
14	9	5	0	0			14	9	4	0	0
14	9	6	0	0			14	9	5	0	0
14	9	7	0	0			14	9	6	0	0
14	9	8	0	0			14	9	7	0	0
14	9	9	0	0			14	9	8	0	0
14	9	10	0	0			14	9	9	0	0
14	9	11	0	0			14	9	10	0	0
14	9	12	0	0			14	9	11	0	0
14	9	13	0	0			14	9	12	0	0
14	9	14	0	0			14	9	13	0	0
14	9	15	0	0			14	9	14	0	0
14	9	16	0	0			14	9	15	0	0
14	9	17	0	0			14	9	16	0	0
14	9	18	0	0			14	9	17	0	0
14	9	19	0	0			14	9	18	0	0
14	9	20	0	0			14	9	19	0	0
14	9	21	0	0			14	9	20	0	0
14	9	22	0	0			14	9	21	0	0
14	9	23	0	0			14	9	22	0	0
14	9	24	0	0			14	9	23	0	0
14	9	25	0	0			14	9	24	0	0
14	9	26	0	0			14	9	25	0	0
14	9	27	0	0			14	9	26	0	0
14	9	28	0	0			14	9	27	0	0
14	9	29	0	0			14	9	28	0	0
14	9	30	0	0			14	9	29	0	0
14	9	31	0	0			14	9	30	0	0
14	9	32	0	0			14	9	31	0	0
14	9	33	0	0			14	9	32	0	0
14	9	34	0	0			14	9	33	0	0
14	9	35	0	0			14	9	34	0	0
14	9	36	0	0			14	9	35	0	0
14	9	37	0	0			14	9	36	0	0
14	9	38	0	0			14	9	37	0	0
14	9	39	0	60			14	9	38	0	0
14	9	40	0	60			14	9	39	0	60
14	9	41	0	60			14	9	40	0	60
14	9	42	0	60			14	9	41	0	60
14	9	43	0	60			14	9	42	0	60
14	9	44	0	60			14	9	43	0	60
14	9	45	0	60			14	9	44	0	60
14	9	46	15	60			14	9	45	0	60
14	9	47	11	60			14	9	46	6	60
14	9	48	13	0			14	9	47	9	60
14	9	49	11	0			14	9	48	17	0
14	9	50	16	0			14	9	49	7	0
14	9	51	8	0			14	9	50	5	0
14	9	52	12	0			14	9	51	16	0
14	9	53	9	0			14	9	52	10	0
14	9	54	12	0			14	9	53	4	0
14	9	55	6	0			14	9	54	12	0
14	9	56	13	0			14	9	55	10	0
14	9	57	8	0			14	9	56	10	0
14	9	58	8	0			14	9	57	5	0
14	9	59	12	0			14	9	58	4	0
14	10	0	6	0			14	9	59	0	0
14	10	1	9	0			14	10	0	6	0
14	10	2	5	0			14	10	1	1	0
14	10	3	8	0			14	10	2	0	0
14	10	4	14	0			14	10	3	7	0
14	10	5	5	0			14	10	4	0	0
14	10	6	16	0			14	10	5	5	0
14	10	7	2	0			14	10	6	6	0
14	10	8	9	0			14	10	7	5	0
14	10	9	8	0			14	10	8	4	0
14	10	10	16	0			14	10	9	4	0
14	10	11	6	0			14	10	10	4	0
14	10	12	0	0			14	10	11	3	0
14	10	13	3	0			14	10	12	1	0
14	10	14	9	0			14	10	13	9	0
14	10	15	7	0			14	10	14	0	0
14	10	16	5	0			14	10	15	13	0
14	10	17	8	0			14	10	16	2	0
14	10	18	9	0			14	10	17	6	0
14	10	19	13	0			14	10	18	4	0
14	10	20	4	0			14	10	19	0	0
14	10	21	7	0			14	10	20	1	0
14	10	22	14	0			14	10	21	8	0
14	10	23	3	0			14	10	22	2	0
14	10	24	3	0			14	10	23	3	0
14	10	25	12	0			14	10	24	2	0
14	10	26	9	0			14	10	25	7	0
14	10	27	7	0			14	10	26	0	0
14	10	28	0	0			14	10	27	9	0
14	10	29	6	0			14	10	28	6	0
14	10	30	3	0			14	10	29	9	0
14	10	31	4	0			14	10	30	0	0
14	10	32	10	0			14	10	31	0	0
14	10	33	4	0			14	10	32	0	0
14	10	34	2	0			14	10	33	6	0
14	10	35	9	0			14	10	34	3	0
14	10	36	8	0			14	10	35	2	0
14	10	37	13	0			14	10	36	6	0
14	10	38	4	0			14	10	37	3	0
14	10	39	3	0			14	10	38	9	0
14	10	40	5	0			14	10	39	2	0
14	10	41	5	0			14	10	40	3	0
14	10	42	4	0			14	10	41	0	0
14	10	43	2	0			14	10	42	3	0
14	10	44	5	0			14	10	43	0	0
14	10	45	3	0			14	10	44	4	0
14	10	46	9	0			14	10	45	4	0
14	10	47	1	0			14	10	46	1	0
14	10	48	3	0			14	10	47	2	0
14	10	49	9	0			14	10	48	3	0
14	10	50	8	0			14	10	49	0	0
14	10	51	4	0			14	10	50	6	0
14	10	52	9	0			14	10	51	6	0
14	10	53	3	0			14	10	52	9	0
14	10	54	0	0			14	10	53	1	0
14	10	55	11	0			14	10	54	0	0
14	10	56	2	0			14	10	55	0	0
14	10	57	11	0			14	10	56	0	0
14	10	58	4	0			14	10	57	1	0
14	10	59	7	0			14	10	58	0	0
14	11	0	7	0			14	10	59	0	0
14	11	1	0	0			14	11	0	0	0
14	11	2	8	0			14	11	1	0	0
14	11	3	1	0			14	11	2	0	0
14	11	4	4	0			14	11	3	0	0
14	11	5	1	0			14	11	4	0	0
14	11	6	3	0			14	11	5	0	0
14	11	7	0	0			14	11	6	0	0
14	11	8	4	0			14	11	7	0	0
14	11	9	4	0			14	11	8	0	0
14	11	10	1	0			14	11	9	4	0
14	11	11	0	0			14	11	10	8	0
14	11	12	0	0			14	11	11	3	0
14	11	13	8	0			14	11	12	9	0
14	11	14	2	0			14	11	13	9	0
14	11	15	5	0			14	11	14	5	0
14	11	16	5	0			14	11	15	5	0
14	11	17	0	0			14	11	16	18	0
14	11	18	6	0			14	11	17	5	0
14	11	19	2	0			14	11	18	6	0
14	11	20	6	0			14	11	19	11	0
14	11	21	0	0			14	11	20	5	0
14	11	22	7	0			14	11	21	0	0
14	11	23	3	0			14	11	22	0	0
14	11	24	0	0			14	11	23	0	0
14	11	25	0	0			14	11	24	0	0
14	11	26	0	0			14	11	25	0	0
14	11	27	0	0			14	11	26	0	0
14	11	28	0	0			14	11	27	0	0
14	11	29	0	0			14	11	28	0	0
14	11	30	0	0			14	11	29	0	0
14	11	31	0	0			14	11	30	0	0
14	11	32	0	0			14	11	31	0	0
14	11	33	0	0			14	11	32	0	0
14	11	34	0	0			14	11	33	0	0
14	11	35	0	0			14	11	34	0	0
14	11	36	0	0			14	11	35	0	0
14	11	37	0	0			14	11	36	0	0
14	11	38	0	0			14	11	37	0	0
14	11	39	0	0			14	11	38	0	0
14	11	40	0	0			14	11	39	0	0
14	11	41	0	0			14	11	40	0	0
14	11	42	0	0			14	11	41	0	0
14	11	43	0	0			14	11	42	0	0
14	11	44	0	0			14	11	43	3	0
14	11	45	0	0			14	11	44	7	0
14	11	46	0	0			14	11	45	13	0
14	11	47	0	0			14	11	46	0	0
14	11	48	0	0			14	11	47	4	0
14	11	49	0	0			14	11	48	0	0
14	11	50	0	0			14	11	49	2	0
14	11	51	0	0			14	11	50	1	0
14	11	52	0	0			14	11	51	0	0
14	11	53	0	0			14	11	52	0	0
14	11	54	5	0			14	11	53	0	0
14	11	55	0	0			14	11	54	1	0
14	11	56	6	0			14	11	55	8	0
14	11	57	9	0			14	11	56	5	0
14	11	58	7	0			14	11	57	8	0
14	11	59	7	0			14	11	58	5	0
14	12	0	0	0			14	11	59	2	0
14	12	1	5	0			14	12	0	4	0
14	12	2	3	0			14	12	1	8	0
14	12	3	3	0			14	12	2	0	0
14	12	4	2	0			14	12	3	0	0
14	12	5	7	0			14	12	4	2	0
14	12	6	0	0			14	12	5	5	0
14	12	7	0	0			14	12	6	0	0
14	12	8	0	0			14	12	7	0	0
14	12	9	0	0			14	12	8	0	0
14	12	10	0	0			14	12	9	1	0
14	12	11	0	0			14	12	10	0	0
14	12	12	0	0			14	12	11	0	0
14	12	13	0	0			14	12	12	0	0
14	12	14	0	0			14	12	13	0	0
14	12	15	0	0			14	12	14	1	0
14	12	16	0	0			14	12	15	0	0
14	12	17	0	0			14	12	16	0	0
14	12	18	0	0			14	12	17	0	0
14	12	19	0	0			14	12	18	0	0
14	12	20	0	0			14	12	19	0	0
14	12	21	0	0			14	12	20	0	0
14	12	22	0	0			14	12	21	0	0
14	12	23	0	0			14	12	22	0	0
14	12	24	0	0			14	12	23	0	0
14	12	25	0	0			14	12	24	0	0
14	12	26	0	0			14	12	25	0	0
14	12	27	0	0			14	12	26	0	0
14	12	28	0	0			14	12	27	0	0
14	12	29	0	0			14	12	28	0	0
14	12	30	0	0			14	12	29	0	0
14	12	31	0	0			14	12	30	0	0
14	12	32	0	0			14	12	31	0	0
14	12	33	0	0			14	12	32	0	0
14	12	34	0	0			14	12	33	0	0
14	12	35	0	0			14	12	34	0	0
14	12	36	0	0			14	12	35	0	0
14	12	37	0	0			14	12	36	0	0
14	12	38	0	0			14	12	37	0	0
14	12	39	0	0			14	12	38	0	0
14	12	40	0	0			14	12	39	0	0
14	12	41	0	0			14	12	40	0	0
14	12	42	0	0			14	12	41	0	0
14	12	43	0	0			14	12	42	0	0
14	12	44	0	0			14	12	43	0	0
14	12	45	0	0			14	12	44	0	0
14	12	46	0	0			14	12	45	2	0
14	12	47	0	0			14	12	46	12	0
14	12	48	2	0			14	12	47	6	0
14	12	49	9	0			14	12	48	7	0
14	12	50	0	0			14	12	49	7	0
14	12	51	9	0			14	12	50	11	0
14	12	52	2	0			14	12	51	7	0
14	12	53	9	0			14	12	52	5	0
14	12	54	1	0			14	12	53	5	0
14	12	55	2	0			14	12	54	1	0
14	12	56	0	0			14	12	55	3	0
14	12	57	0	0			14	12	56	3	0
14	12	58	12	0			14	12	57	2	0
14	12	59	9	0			14	12	58	0	0
14	13	0	3	0			14	12	59	0	0
14	13	1	3	0			14	13	0	0	0
14	13	2	6	0			14	13	1	3	0
14	13	3	3	0			14	13	2	3	0
14	13	4	3	0			14	13	3	7	0
14	13	5	0	0			14	13	4	3	0
14	13	6	3	0			14	13	5	0	0
14	13	7	7	0			14	13	6	5	0
14	13	8	6	0			14	13	7	0	0
14	13	9	4	0			14	13	8	6	0
14	13	10	7	0			14	13	9	3	0
14	13	11	1	0			14	13	10	1	0
14	13	12	0	0			14	13	11	4	0
14	13	13	0	0			14	13	12	9	0
14	13	14	0	0			14	13	13	7	0
14	13	15	4	0			14	13	14	0	0
14	13	16	4	0			14	13	15	0	0
14	13	17	0	0			14	13	16	0	0
14	13	18	0	0			14	13	17	2	0
14	13	19	8	0			14	13	18	1	0
14	13	20	2	0			14	13	19	0	0
14	13	21	0	0			14	13	20	1	0
14	13	22	3	0			14	13	21	3	0
14	13	23	5	0			14	13	22	0	0
14	13	24	3	0			14	13	23	0	0
14	13	25	11	0			14	13	24	0	0
14	13	26	3	0			14	13	25	0	0
14	13	27	1	0			14	13	26	0	0
14	13	28	0	0			14	13	27	0	0
14	13	29	0	0			14	13	28	0	0
14	13	30	1	0			14	13	29	0	0
14	13	31	2	0			14	13	30	0	0
14	13	32	0	0			14	13	31	0	0
14	13	33	0	0			14	13	32	0	0
14	13	34	0	0			14	13	33	0	0
14	13	35	5	0			14	13	34	0	0
14	13	36	1	0			14	13	35	0	0
14	13	37	0	0			14	13	36	0	0
14	13	38	0	0			14	13	37	0	0
14	13	39	0	0			14	13	38	0	0
14	13	40	0	0			14	13	39	0	0
14	13	41	0	0			14	13	40	0	0
14	13	42	0	0			14	13	41	0	0
14	13	43	2	0			14	13	42	0	0
14	13	44	0	0			14	13	43	0	0
14	13	45	0	0			14	13	44	0	0
14	13	46	0	0			14	13	45	0	0
14	13	47	0	0			14	13	46	0	0
14	13	48	0	0			14	13	47	0	0
14	13	49	0	0			14	13	48	0	0
14	13	50	0	0			14	13	49	0	0
14	13	51	0	0			14	13	50	0	0
14	13	52	0	0			14	13	51	0	0
14	13	53	0	0			14	13	52	0	0
14	13	54	0	0			14	13	53	0	0
14	13	55	0	0			14	13	54	0	0
14	13	56	0	0			14	13	55	0	0
14	13	57	0	0			14	13	56	0	0
14	13	58	0	0			14	13	57	0	0
14	13	59	0	0			14	13	58	0	0
14	14	0	0	0			14	13	59	0	0
14	14	1	0	0			14	14	0	0	0
14	14	2	0	0			14	14	1	0	0
14	14	3	0	0			14	14	2	0	0
14	14	4	0	0			14	14	3	0	0
14	14	5	0	0			14	14	4	0	0
14	14	6	0	0			14	14	5	0	0
14	14	7	0	0			14	14	6	0	0
14	14	8	0	0			14	14	7	0	0
14	14	9	0	0			14	14	8	0	0
14	14	10	0	0			14	14	9	0	0
14	14	11	0	0			14	14	10	0	0
14	14	12	0	0			14	14	11	0	0
14	14	13	0	0			14	14	12	0	0
14	14	14	0	0			14	14	13	0	0
14	14	15	0	0			14	14	14	0	0
14	14	16	0	0			14	14	15	0	0
14	14	17	0	0			14	14	16	0	0
14	14	18	0	0			14	14	17	0	0
14	14	19	0	0			14	14	18	0	0
14	14	20	0	0			14	14	19	0	0
14	14	21	0	0			14	14	20	0	0
14	14	22	0	0			14	14	21	0	0
14	14	23	0	0			14	14	22	0	0
14	14	24	0	0			14	14	23	0	0
14	14	25	0	0			14	14	24	0	0
14	14	26	0	0			14	14	25	0	0
14	14	27	0	0			14	14	26	0	0
14	14	28	0	0			14	14	27	0	0
14	14	29	0	0			14	14	28	0	0
14	14	30	0	0			14	14	29	0	0
14	14	31	0	0			14	14	30	0	0
14	14	32	0	0			14	14	31	0	0
14	14	33	0	0			14	14	32	0	0
14	14	34	0	0			14	14	33	0	0
14	14	35	0	0			14	14	34	0	0
14	14	36	0	0			14	14	35	0	0
14	14	37	0	0			14	14	36	0	0
14	14	38	0	0			14	14	37	0	0
14	14	39	0	0			14	14	38	0	0
14	14	40	0	0			14	14	39	0	0
14	14	41	0	0			14	14	40	0	0
14	14	42	0	0			14	14	41	0	0
14	14	43	0	0			14	14	42	0	0
14	14	44	0	0			14	14	43	0	0
14	14	45	0	0			14	14	44	0	0
14	14	46	0	0			14	14	45	0	0
14	14	47	0	0			14	14	46	0	0
14	14	48	0	0			14	14	47	0	0
14	14	49	0	0			14	14	48	0	0
14	14	50	0	0			14	14	49	0	0
14	14	51	0	0			14	14	50	0	0
14	14	52	0	0			14	14	51	0	0
14	14	53	0	0			14	14	52	0	0
14	14	54	0	0			14	14	53	0	0
14	14	55	0	0			14	14	54	0	0
14	14	56	0	0			14	14	55	0	0
14	14	57	0	0			14	14	56	0	0
14	14	58	0	0			14	14	57	0	0
14	14	59	0	0			14	14	58	0	0
14	15	0	0	0			14	14	59	0	0
14	15	1	0	0			14	15	0	0	0
14	15	2	0	0			14	15	1	0	0
14	15	3	0	0			14	15	2	0	0
14	15	4	0	0			14	15	3	0	0
14	15	5	0	0			14	15	4	0	0
14	15	6	0	0			14	15	5	0	0
14	15	7	0	0			14	15	6	0	0
14	15	8	0	0			14	15	7	0	0
14	15	9	0	0			14	15	8	0	0
14	15	10	0	0			14	15	9	0	0
14	15	11	0	0			14	15	10	0	0
14	15	12	0	0			14	15	11	0	0
14	15	13	0	0			14	15	12	0	0
14	15	14	0	0			14	15	13	0	0
14	15	15	0	0			14	15	14	0	0
14	15	16	0	0			14	15	15	0	0
14	15	17	0	0			14	15	16	0	0
14	15	18	0	0			14	15	17	0	0
14	15	19	0	0			14	15	18	0	0
14	15	20	0	0			14	15	19	0	0
14	15	21	0	0			14	15	20	0	0
14	15	22	0	0			14	15	21	0	0
14	15	23	0	0			14	15	22	0	0
14	15	24	0	0			14	15	23	0	0
14	15	25	0	0			14	15	24	0	0
14	15	26	0	0			14	15	25	0	0
14	15	27	0	0			14	15	26	0	0
14	15	28	0	0			14	15	27	0	0
14	15	29	0	0			14	15	28	0	0
14	15	30	0	0			14	15	29	0	0
14	15	31	0	0			14	15	30	0	0
14	15	32	0	0			14	15	31	0	0
14	15	33	0	0			14	15	32	0	0
14	15	34	0	0			14	15	33	0	0
14	15	35	0	0			14	15	34	0	0
14	15	36	0	0			14	15	35	0	0
14	15	37	0	0			14	15	36	0	0
14	15	38	0	0			14	15	37	0	0
14	15	39	0	0			14	15	38	0	0
14	15	40	0	0			14	15	39	0	0
14	15	41	0	0			14	15	40	0	0
14	15	42	0	0			14	15	41	0	0
14	15	43	0	0			14	15	42	0	0
14	15	44	0	0			14	15	43	0	0
14	15	45	0	0			14	15	44	0	0
14	15	46	0	0			14	15	45	0	0
14	15	47	0	0			14	15	46	0	0
14	15	48	0	0			14	15	47	0	0
14	15	49	0	0			14	15	48	0	0
14	15	50	0	0			14	15	49	0	0
14	15	51	0	0			14	15	50	0	0
14	15	52	0	0			14	15	51	0	0
14	15	53	0	0			14	15	52	0	0
14	15	54	0	0			14	15	53	0	0
14	15	55	0	0			14	15	54	0	0
14	15	56	0	0			14	15	55	0	0
14	15	57	0	0			14	15	56	0	0
14	15	58	0	0			14	15	57	0	0
14	15	59	0	0			14	15	58	0	0
14	16	0	0	0			14	15	59	11	0
14	16	1	0	0			14	16	0	0	0
14	16	2	0	0			14	16	1	0	0
14	16	3	0	0			14	16	2	7	0
14	16	4	0	0			14	16	3	7	0
14	16	5	0	0			14	16	4	9	0
14	16	6	0	0			14	16	5	0	0
14	16	7	0	0			14	16	6	0	0
14	16	8	0	0			14	16	7	4	0
14	16	9	0	0			14	16	8	0	0
14	16	10	0	0			14	16	9	0	0
14	16	11	0	0			14	16	10	0	0
14	16	12	0	0			14	16	11	0	0
14	16	13	0	0			14	16	12	1	0
14	16	14	0	0			14	16	13	2	0
14	16	15	0	0			14	16	14	3	0
14	16	16	0	0			14	16	15	0	0
14	16	17	0	0			14	16	16	2	0
14	16	18	0	0			14	16	17	9	0
14	16	19	3	0			14	16	18	7	0
14	16	20	4	0			14	16	19	3	0
14	16	21	4	0			14	16	20	1	0
14	16	22	0	0			14	16	21	0	0
14	16	23	0	0			14	16	22	3	0
14	16	24	0	0			14	16	23	4	0
14	16	25	0	0			14	16	24	0	0
14	16	26	0	0			14	16	25	0	0
14	16	27	0	0			14	16	26	0	0
14	16	28	0	0			14	16	27	4	0
14	16	29	0	0			14	16	28	9	0
14	16	30	0	0			14	16	29	6	0
14	16	31	11	0			14	16	30	1	0
14	16	32	6	0			14	16	31	16	0
14	16	33	9	0			14	16	32	4	0
14	16	34	1	0			14	16	33	0	0
14	16	35	6	0			14	16	34	0	0
14	16	36	5	0			14	16	35	1	0
14	16	37	1	0			14	16	36	9	0
14	16	38	0	0			14	16	37	5	0
14	16	39	4	0			14	16	38	6	0
14	16	40	6	0			14	16	39	0	0
14	16	41	4	0			14	16	40	0	0
14	16	42	7	0			14	16	41	0	0
14	16	43	0	0			14	16	42	0	0
14	16	44	0	0			14	16	43	4	0
14	16	45	8	0			14	16	44	2	0
14	16	46	9	0			14	16	45	3	0
14	16	47	3	0			14	16	46	0	0
14	16	48	6	0			14	16	47	0	0
14	16	49	1	0			14	16	48	1	0
14	16	50	0	0			14	16	49	3	0
14	16	51	8	0			14	16	50	1	0
14	16	52	2	0			14	16	51	0	0
14	16	53	0	0			14	16	52	0	0
14	16	54	0	0			14	16	53	0	0
14	16	55	9	0			14	16	54	1	0
14	16	56	2	0			14	16	55	5	0
14	16	57	0	0			14	16	56	10	0
14	16	58	0	0			14	16	57	2	0
14	16	59	0	0			14	16	58	0	0
14	17	0	0	0			14	16	59	0	0
14	17	1	0	0			14	17	0	0	0
14	17	2	0	0			14	17	1	0	0
14	17	3	0	0			14	17	2	1	0
14	17	4	0	0			14	17	3	0	0
14	17	5	0	0			14	17	4	0	0
14	17	6	2	0			14	17	5	6	0
14	17	7	2	0			14	17	6	4	0
14	17	8	0	0			14	17	7	0	0
14	17	9	0	0			14	17	8	0	0
14	17	10	0	0			14	17	9	4	0
14	17	11	0	0			14	17	10	2	0
14	17	12	0	0			14	17	11	0	0
14	17	13	0	0			14	17	12	0	0
14	17	14	0	0			14	17	13	1	0
14	17	15	0	0			14	17	14	4	0
14	17	16	0	0			14	17	15	11	0
14	17	17	0	0			14	17	16	5	0
14	17	18	0	0			14	17	17	0	0
14	17	19	0	0			14	17	18	0	0
14	17	20	0	0			14	17	19	0	0
14	17	21	0	0			14	17	20	0	0
14	17	22	0	0			14	17	21	0	0
14	17	23	0	0			14	17	22	0	0
14	17	24	0	0			14	17	23	1	0
14	17	25	0	0			14	17	24	0	0
14	17	26	0	0			14	17	25	0	0
14	17	27	0	0			14	17	26	1	0
14	17	28	0	0			14	17	27	0	0
14	17	29	0	0			14	17	28	0	0
14	17	30	0	0			14	17	29	0	0
14	17	31	0	0			14	17	30	0	0
14	17	32	0	0			14	17	31	0	0
14	17	33	0	0			14	17	32	0	0
14	17	34	0	0			14	17	33	0	0
14	17	35	0	0			14	17	34	0	0
14	17	36	0	0			14	17	35	0	0
14	17	37	0	0			14	17	36	0	0
14	17	38	0	0			14	17	37	0	0
14	17	39	0	0			14	17	38	0	0
14	17	40	0	0			14	17	39	0	0
14	17	41	0	0			14	17	40	0	0
14	17	42	0	0			14	17	41	0	0
14	17	43	0	0			14	17	42	0	0
14	17	44	0	0			14	17	43	0	0
14	17	45	0	0			14	17	44	0	0
14	17	46	0	0			14	17	45	0	0
14	17	47	0	0			14	17	46	0	0
14	17	48	0	0			14	17	47	0	0
14	17	49	0	0			14	17	48	0	0
14	17	50	0	0			14	17	49	0	0
14	17	51	0	0			14	17	50	0	0
14	17	52	0	0			14	17	51	0	0
14	17	53	0	0			14	17	52	0	0
14	17	54	0	0			14	17	53	0	0
14	17	55	0	0			14	17	54	0	0
14	17	56	0	0			14	17	55	0	0
14	17	57	0	0			14	17	56	0	0
14	17	58	0	0			14	17	57	0	0
14	17	59	0	0			14	17	58	0	0
14	18	0	0	0			14	17	59	0	0
14	18	1	0	0			14	18	0	0	0
14	18	2	0	0			14	18	1	0	0
14	18	3	0	0			14	18	2	0	0
14	18	4	0	0			14	18	3	0	0
14	18	5	0	0			14	18	4	0	0
14	18	6	0	0			14	18	5	0	0
14	18	7	0	0			14	18	6	0	0
14	18	8	0	0			14	18	7	0	0
14	18	9	0	0			14	18	8	0	0
14	18	10	0	0			14	18	9	0	0
14	18	11	0	0			14	18	10	0	0
14	18	12	0	0			14	18	11	0	0
14	18	13	0	0			14	18	12	0	0
14	18	14	0	0			14	18	13	0	0
14	18	15	0	0			14	18	14	0	0
14	18	16	0	0			14	18	15	0	0
14	18	17	0	0			14	18	16	0	0
14	18	18	0	0			14	18	17	0	0
14	18	19	0	0			14	18	18	0	0
14	18	20	0	0			14	18	19	0	0
14	18	21	0	0			14	18	20	0	0
14	18	22	0	0			14	18	21	0	0
14	18	23	0	0			14	18	22	0	0
14	18	24	0	0			14	18	23	0	0
14	18	25	0	0			14	18	24	0	0
14	18	26	0	0			14	18	25	0	0
14	18	27	0	0			14	18	26	0	0
14	18	28	0	0			14	18	27	0	0
14	18	29	0	0			14	18	28	0	0
14	18	30	0	0			14	18	29	0	0
14	18	31	0	0			14	18	30	0	0
14	18	32	0	0			14	18	31	0	0
14	18	33	0	0			14	18	32	0	0
14	18	34	0	0			14	18	33	0	0
14	18	35	0	0			14	18	34	0	0
14	18	36	0	0			14	18	35	0	0
14	18	37	0	0			14	18	36	0	0
14	18	38	0	0			14	18	37	0	0
14	18	39	0	0			14	18	38	0	0
14	18	40	0	0			14	18	39	0	0
14	18	41	0	0			14	18	40	0	0
14	18	42	0	0			14	18	41	0	0
14	18	43	0	0			14	18	42	0	0
14	18	44	0	0			14	18	43	0	0
14	18	45	0	0			14	18	44	0	0
14	18	46	0	0			14	18	45	0	0
14	18	47	0	0			14	18	46	0	0
14	18	48	4	0			14	18	47	0	0
14	18	49	0	0			14	18	48	0	0
14	18	50	4	0			14	18	49	0	0
14	18	51	0	0			14	18	50	0	0
14	18	52	0	0			14	18	51	0	0
14	18	53	0	0			14	18	52	0	0
14	18	54	0	0			14	18	53	0	0
14	18	55	0	0			14	18	54	0	0
14	18	56	0	0			14	18	55	0	0
14	18	57	0	0			14	18	56	0	0
14	18	58	0	0			14	18	57	2	0
14	18	59	7	0			14	18	58	3	0
14	19	0	1	0			14	18	59	0	0
14	19	1	9	0			14	19	0	0	0
14	19	2	4	0			14	19	1	0	0
14	19	3	4	0			14	19	2	6	0
14	19	4	0	0			14	19	3	0	0
14	19	5	0	0			14	19	4	0	0
14	19	6	7	0			14	19	5	0	0
14	19	7	3	0			14	19	6	0	0
14	19	8	0	0			14	19	7	0	0
14	19	9	1	0			14	19	8	0	0
14	19	10	5	0			14	19	9	0	0
14	19	11	3	0			14	19	10	0	0
14	19	12	0	0			14	19	11	0	0
14	19	13	0	0			14	19	12	0	0
14	19	14	0	0			14	19	13	0	0
14	19	15	0	0			14	19	14	1	0
14	19	16	0	0			14	19	15	10	0
14	19	17	0	0			14	19	16	0	0
14	19	18	0	0			14	19	17	3	0
14	19	19	3	0			14	19	18	5	0
14	19	20	8	0			14	19	19	7	0
14	19	21	1	0			14	19	20	2	0
14	19	22	0	0			14	19	21	0	0
14	19	23	0	0			14	19	22	0	0
14	19	24	0	0			14	19	23	9	0
14	19	25	0	0			14	19	24	3	0
14	19	26	0	0			14	19	25	0	0
14	19	27	0	0			14	19	26	0	0
14	19	28	0	0			14	19	27	2	0
14	19	29	0	0			14	19	28	7	0
14	19	30	0	0			14	19	29	1	0
14	19	31	0	0			14	19	30	9	0
14	19	32	0	0			14	19	31	8	0
14	19	33	0	0			14	19	32	0	0
14	19	34	0	0			14	19	33	0	0
14	19	35	0	0			14	19	34	2	0
14	19	36	0	0			14	19	35	0	0
14	19	37	0	0			14	19	36	4	0
14	19	38	0	0			14	19	37	9	0
14	19	39	0	0			14	19	38	0	0
14	19	40	0	0			14	19	39	6	0
14	19	41	0	0			14	19	40	1	0
14	19	42	0	0			14	19	41	12	0
14	19	43	0	0			14	19	42	11	0
14	19	44	0	0			14	19	43	2	0
14	19	45	0	0			14	19	44	5	0
14	19	46	0	0			14	19	45	4	0
14	19	47	0	0			14	19	46	0	0
14	19	48	0	0			14	19	47	2	0
14	19	49	0	0			14	19	48	11	0
14	19	50	0	0			14	19	49	0	0
14	19	51	0	0			14	19	50	3	0
14	19	52	0	0			14	19	51	9	0
14	19	53	0	0			14	19	52	7	0
14	19	54	0	0			14	19	53	3	0
14	19	55	0	0			14	19	54	0	0
14	19	56	0	0			14	19	55	0	0
14	19	57	0	0			14	19	56	7	0
14	19	58	0	0			14	19	57	0	0
14	19	59	0	0			14	19	58	3	0
14	20	0	0	0			14	19	59	11	0
14	20	1	0	0			14	20	0	5	0
14	20	2	0	0			14	20	1	10	0
14	20	3	0	0			14	20	2	15	0
14	20	4	0	0			14	20	3	7	0
14	20	5	0	0			14	20	4	0	0
14	20	6	0	0			14	20	5	0	0
14	20	7	0	0			14	20	6	7	0
14	20	8	0	0			14	20	7	6	0
14	20	9	0	0			14	20	8	2	0
14	20	10	0	0			14	20	9	0	0
14	20	11	0	0			14	20	10	0	0
14	20	12	0	0			14	20	11	5	0
14	20	13	0	0			14	20	12	5	0
14	20	14	0	0			14	20	13	6	0
14	20	15	0	0			14	20	14	6	0
14	20	16	0	0			14	20	15	7	0
14	20	17	0	0			14	20	16	6	0
14	20	18	0	0			14	20	17	5	0
14	20	19	4	0			14	20	18	11	0
14	20	20	0	0			14	20	19	4	0
14	20	21	10	0			14	20	20	0	0
14	20	22	2	0			14	20	21	0	0
14	20	23	0	0			14	20	22	0	0
14	20	24	0	0			14	20	23	0	0
14	20	25	0	0			14	20	24	0	0
14	20	26	8	0			14	20	25	0	0
14	20	27	0	0			14	20	26	0	0
14	20	28	0	0			14	20	27	0	0
14	20	29	0	0			14	20	28	2	0
14	20	30	0	0			14	20	29	0	0
14	20	31	0	0			14	20	30	0	0
14	20	32	0	0			14	20	31	0	0
14	20	33	0	0			14	20	32	0	0
14	20	34	0	0			14	20	33	0	0
14	20	35	0	0			14	20	34	0	0
14	20	36	0	0			14	20	35	0	0
14	20	37	0	0			14	20	36	0	0
14	20	38	0	0			14	20	37	0	0
14	20	39	0	0			14	20	38	0	0
14	20	40	0	0			14	20	39	0	0
14	20	41	0	0			14	20	40	0	0
14	20	42	0	0			14	20	41	0	0
14	20	43	0	0			14	20	42	0	0
14	20	44	0	0			14	20	43	0	0
14	20	45	0	0			14	20	44	0	0
14	20	46	0	0			14	20	45	0	0
14	20	47	0	0			14	20	46	0	0
14	20	48	5	0			14	20	47	0	0
14	20	49	0	0			14	20	48	0	0
14	20	50	0	0			14	20	49	0	0
14	20	51	0	0			14	20	50	0	0
14	20	52	0	0			14	20	51	0	0
14	20	53	0	0			14	20	52	0	0
14	20	54	0	0			14	20	53	0	0
14	20	55	1	0			14	20	54	0	0
14	20	56	0	0			14	20	55	0	0
14	20	57	0	0			14	20	56	1	0
14	20	58	2	0			14	20	57	0	0
14	20	59	4	0			14	20	58	0	0
14	21	0	2	0			14	20	59	0	0
14	21	1	0	0			14	21	0	0	0
14	21	2	0	0			14	21	1	1	0
14	21	3	0	0			14	21	2	8	0
14	21	4	0	0			14	21	3	8	0
14	21	5	0	0			14	21	4	6	0
14	21	6	0	0			14	21	5	10	0
14	21	7	0	0			14	21	6	1	0
14	21	8	0	0			14	21	7	1	0
14	21	9	0	0			14	21	8	0	0
14	21	10	0	0			14	21	9	0	0
14	21	11	0	0			14	21	10	1	0
14	21	12	0	0			14	21	11	6	0
14	21	13	1	0			14	21	12	11	0
14	21	14	0	0			14	21	13	9	0
14	21	15	12	0			14	21	14	1	0
14	21	16	5	0			14	21	15	0	0
14	21	17	8	0			14	21	16	12	0
14	21	18	3	0			14	21	17	0	0
14	21	19	0	0			14	21	18	2	0
14	21	20	9	0			14	21	19	0	0
14	21	21	7	0			14	21	20	0	0
14	21	22	5	0			14	21	21	0	0
14	21	23	6	0			14	21	22	3	0
14	21	24	0	0			14	21	23	9	0
14	21	25	0	0			14	21	24	0	0
14	21	26	0	0			14	21	25	0	0
14	21	27	0	0			14	21	26	1	0
14	21	28	0	0			14	21	27	4	0
14	21	29	0	0			14	21	28	2	0
14	21	30	0	0			14	21	29	5	0
14	21	31	0	0			14	21	30	0	0
14	21	32	0	0			14	21	31	0	0
14	21	33	0	0			14	21	32	1	0
14	21	34	0	0			14	21	33	0	0
14	21	35	0	0			14	21	34	0	0
14	21	36	0	0			14	21	35	0	0
14	21	37	0	0			14	21	36	8	0
14	21	38	0	0			14	21	37	3	0
14	21	39	0	0			14	21	38	0	0
14	21	40	5	0			14	21	39	0	0
14	21	41	4	0			14	21	40	0	0
14	21	42	1	0			14	21	41	0	0
14	21	43	5	0			14	21	42	0	0
14	21	44	7	0			14	21	43	3	0
14	21	45	3	0			14	21	44	1	0
14	21	46	0	0			14	21	45	0	0
14	21	47	0	0			14	21	46	0	0
14	21	48	0	0			14	21	47	0	0
14	21	49	0	0			14	21	48	0	0
14	21	50	0	0			14	21	49	15	0
14	21	51	0	0			14	21	50	7	0
14	21	52	0	0			14	21	51	0	0
14	21	53	0	0			14	21	52	0	0
14	21	54	0	0			14	21	53	0	0
14	21	55	0	0			14	21	54	3	0
14	21	56	0	0			14	21	55	7	0
14	21	57	0	0			14	21	56	5	0
14	21	58	0	0			14	21	57	1	0
14	21	59	0	0			14	21	58	2	0
14	22	0	0	0			14	21	59	5	0
14	22	1	0	0			14	22	0	4	0
14	22	2	0	0			14	22	1	0	0
14	22	3	0	0			14	22	2	0	0
14	22	4	2	0			14	22	3	7	0
14	22	5	2	0			14	22	4	6	0
14	22	6	0	0			14	22	5	0	0
14	22	7	0	0			14	22	6	0	0
14	22	8	0	0			14	22	7	0	0
14	22	9	0	0			14	22	8	0	0
14	22	10	0	0			14	22	9	0	0
14	22	11	2	0			14	22	10	0	0
14	22	12	0	0			14	22	11	0	0
14	22	13	0	0			14	22	12	0	0
14	22	14	0	0			14	22	13	0	0
14	22	15	0	0			14	22	14	0	0
14	22	16	0	0			14	22	15	0	0
14	22	17	0	0			14	22	16	0	0
14	22	18	0	0			14	22	17	0	0
14	22	19	0	0			14	22	18	0	0
14	22	20	0	0			14	22	19	0	0
14	22	21	0	0			14	22	20	0	0
14	22	22	0	0			14	22	21	0	0
14	22	23	0	0			14	22	22	0	0
14	22	24	0	0			14	22	23	0	0
14	22	25	0	0			14	22	24	0	0
14	22	26	0	0			14	22	25	0	0
14	22	27	2	0			14	22	26	0	0
14	22	28	2	0			14	22	27	0	0
14	22	29	0	0			14	22	28	0	0
14	22	30	0	0			14	22	29	0	0
14	22	31	0	0			14	22	30	0	0
14	22	32	0	0			14	22	31	0	0
14	22	33	0	0			14	22	32	0	0
14	22	34	0	0			14	22	33	0	0
14	22	35	0	0			14	22	34	0	0
14	22	36	0	0			14	22	35	0	0
14	22	37	0	0			14	22	36	0	0
14	22	38	0	0			14	22	37	0	0
14	22	39	0	0			14	22	38	0	0
14	22	40	0	0			14	22	39	0	0
14	22	41	1	0			14	22	40	0	0
14	22	42	2	0			14	22	41	0	0
14	22	43	0	0			14	22	42	0	0
14	22	44	0	0			14	22	43	0	0
14	22	45	0	0			14	22	44	0	0
14	22	46	0	0			14	22	45	0	0
14	22	47	0	0			14	22	46	0	0
14	22	48	0	0			14	22	47	0	0
14	22	49	0	0			14	22	48	0	0
14	22	50	0	0			14	22	49	0	0
14	22	51	0	0			14	22	50	0	0
14	22	52	0	0			14	22	51	0	0
14	22	53	4	0			14	22	52	0	0
14	22	54	9	0			14	22	53	0	0
14	22	55	0	0			14	22	54	0	0
14	22	56	3	0			14	22	55	0	0
14	22	57	8	0			14	22	56	0	0
14	22	58	5	0			14	22	57	0	0
14	22	59	7	0			14	22	58	0	0
14	23	0	4	0			14	22	59	0	0
14	23	1	0	0			14	23	0	0	0
14	23	2	2	0			14	23	1	0	0
14	23	3	2	0			14	23	2	0	0
14	23	4	0	0			14	23	3	0	0
14	23	5	0	0			14	23	4	4	0
14	23	6	2	0			14	23	5	0	0
14	23	7	10	0			14	23	6	0	0
14	23	8	0	0			14	23	7	0	0
14	23	9	7	0			14	23	8	0	0
14	23	10	11	0			14	23	9	1	0
14	23	11	6	0			14	23	10	9	0
14	23	12	1	0			14	23	11	6	0
14	23	13	0	0			14	23	12	5	0
14	23	14	2	0			14	23	13	14	0
14	23	15	0	0			14	23	14	2	0
14	23	16	0	0			14	23	15	0	0
14	23	17	1	0			14	23	16	0	0
14	23	18	1	0			14	23	17	0	0
14	23	19	5	0			14	23	18	0	0
14	23	20	0	0			14	23	19	2	0
14	23	21	3	0			14	23	20	0	0
14	23	22	6	0			14	23	21	0	0
14	23	23	0	0			14	23	22	1	0
14	23	24	0	0			14	23	23	1	0
14	23	25	2	0			14	23	24	4	0
14	23	26	3	0			14	23	25	7	0
14	23	27	6	0			14	23	26	11	0
14	23	28	1	0			14	23	27	8	0
14	23	29	11	0			14	23	28	6	0
14	23	30	8	0			14	23	29	0	0
14	23	31	0	0			14	23	30	6	0
14	23	32	0	0			14	23	31	3	0
14	23	33	0	0			14	23	32	3	0
14	23	34	13	0			14	23	33	1	0
14	23	35	7	0			14	23	34	2	0
14	23	36	6	0			14	23	35	9	0
14	23	37	6	0			14	23	36	3	0
14	23	38	4	0			14	23	37	0	0
14	23	39	2	0			14	23	38	0	0
14	23	40	0	0			14	23	39	0	0
14	23	41	0	0			14	23	40	0	0
14	23	42	0	0			14	23	41	0	0
14	23	43	0	0			14	23	42	0	0
14	23	44	0	0			14	23	43	2	0
14	23	45	0	0			14	23	44	9	0
14	23	46	0	0			14	23	45	2	0
14	23	47	0	0			14	23	46	3	0
14	23	48	0	0			14	23	47	11	0
14	23	49	0	0			14	23	48	0	0
14	23	50	1	0			14	23	49	5	0
14	23	51	4	0			14	23	50	0	0
14	23	52	0	0			14	23	51	0	0
14	23	53	0	0			14	23	52	0	0
14	23	54	3	0			14	23	53	1	0
14	23	55	2	0			14	23	54	0	0
14	23	56	6	0			14	23	55	0	0
14	23	57	3	0			14	23	56	0	0
14	23	58	0	0			14	23	57	0	0
14	23	59	0	0			14	23	58	0	0
15	0	0	2	0			14	23	59	0	0
15	0	1	3	0			15	0	0	0	0
15	0	2	2	0			15	0	1	1	0
15	0	3	0	0			15	0	2	0	0
15	0	4	0	0			15	0	3	0	0
15	0	5	9	0			15	0	4	0	0
15	0	6	3	0			15	0	5	1	0
15	0	7	0	0			15	0	6	0	0
15	0	8	0	0			15	0	7	0	0
15	0	9	0	0			15	0	8	0	0
15	0	10	0	0			15	0	9	0	0
15	0	11	1	0			15	0	10	0	0
15	0	12	3	0			15	0	11	0	0
15	0	13	0	0			15	0	12	0	0
15	0	14	0	0			15	0	13	0	0
15	0	15	2	0			15	0	14	0	0
15	0	16	1	0			15	0	15	0	0
15	0	17	1	0			15	0	16	4	0
15	0	18	7	0			15	0	17	8	0
15	0	19	0	0			15	0	18	2	0
15	0	20	0	0			15	0	19	0	0
15	0	21	0	0			15	0	20	0	0
15	0	22	3	0			15	0	21	0	0
15	0	23	0	0			15	0	22	0	0
15	0	24	0	0			15	0	23	0	0
15	0	25	0	0			15	0	24	5	0
15	0	26	0	0			15	0	25	8	0
15	0	27	1	0			15	0	26	4	0
15	0	28	0	0			15	0	27	8	0
15	0	29	0	0			15	0	28	4	0
15	0	30	0	0			15	0	29	2	0
15	0	31	0	0			15	0	30	0	0
15	0	32	0	0			15	0	31	1	0
15	0	33	0	0			15	0	32	0	0
15	0	34	0	0			15	0	33	0	0
15	0	35	0	0			15	0	34	0	0
15	0	36	5	0			15	0	35	0	0
15	0	37	3	0			15	0	36	0	0
15	0	38	0	0			15	0	37	0	0
15	0	39	0	0			15	0	38	0	0
15	0	40	0	0			15	0	39	0	0
15	0	41	0	0			15	0	40	0	0
15	0	42	0	0			15	0	41	0	0
15	0	43	0	0			15	0	42	0	0
15	0	44	0	0			15	0	43	0	0
15	0	45	0	0			15	0	44	0	0
15	0	46	0	0			15	0	45	0	0
15	0	47	3	0			15	0	46	0	0
15	0	48	0	0			15	0	47	0	0
15	0	49	0	0			15	0	48	0	0
15	0	50	0	0			15	0	49	0	0
15	0	51	0	0			15	0	50	0	0
15	0	52	0	0			15	0	51	0	0
15	0	53	0	0			15	0	52	0	0
15	0	54	0	0			15	0	53	0	0
15	0	55	0	0			15	0	54	0	0
15	0	56	0	0			15	0	55	0	0
15	0	57	0	0			15	0	56	0	0
15	0	58	0	0			15	0	57	0	0
15	0	59	0	0			15	0	58	0	0
15	1	0	0	0			15	0	59	0	0
15	1	1	0	0			15	1	0	0	0
15	1	2	0	0			15	1	1	0	0
15	1	3	3	0			15	1	2	0	0
15	1	4	0	0			15	1	3	0	0
15	1	5	0	0			15	1	4	0	0
15	1	6	0	0			15	1	5	0	0
15	1	7	0	0			15	1	6	0	0
15	1	8	0	0			15	1	7	0	0
15	1	9	3	0			15	1	8	0	0
15	1	10	0	0			15	1	9	0	0
15	1	11	0	0			15	1	10	0	0
15	1	12	0	0			15	1	11	0	0
15	1	13	0	0			15	1	12	0	0
15	1	14	0	0			15	1	13	0	0
15	1	15	0	0			15	1	14	0	0
15	1	16	2	0			15	1	15	0	0
15	1	17	12	0			15	1	16	0	0
15	1	18	1	0			15	1	17	4	0
15	1	19	0	0			15	1	18	3	0
15	1	20	0	0			15	1	19	0	0
15	1	21	0	0			15	1	20	0	0
15	1	22	0	0			15	1	21	0	0
15	1	23	2	0			15	1	22	4	0
15	1	24	1	0			15	1	23	3	0
15	1	25	4	0			15	1	24	7	0
15	1	26	3	0			15	1	25	3	0
15	1	27	0	0			15	1	26	6	0
15	1	28	2	0			15	1	27	3	0
15	1	29	5	0			15	1	28	0	0
15	1	30	0	0			15	1	29	0	0
15	1	31	0	0			15	1	30	2	0
15	1	32	5	0			15	1	31	6	0
15	1	33	2	0			15	1	32	0	0
15	1	34	7	0			15	1	33	0	0
15	1	35	4	0			15	1	34	0	0
15	1	36	6	0			15	1	35	0	0
15	1	37	0	0			15	1	36	3	0
15	1	38	0	0			15	1	37	2	0
15	1	39	3	0			15	1	38	7	0
15	1	40	3	0			15	1	39	11	0
15	1	41	1	0			15	1	40	11	0
15	1	42	1	0			15	1	41	2	0
15	1	43	1	0			15	1	42	0	0
15	1	44	3	0			15	1	43	0	0
15	1	45	0	0			15	1	44	0	0
15	1	46	2	0			15	1	45	0	0
15	1	47	4	0			15	1	46	0	0
15	1	48	0	0			15	1	47	0	0
15	1	49	1	0			15	1	48	0	0
15	1	50	2	0			15	1	49	0	0
15	1	51	0	0			15	1	50	0	0
15	1	52	0	0			15	1	51	0	0
15	1	53	2	0			15	1	52	0	0
15	1	54	3	0			15	1	53	0	0
15	1	55	1	0			15	1	54	0	0
15	1	56	0	0			15	1	55	0	0
15	1	57	0	0			15	1	56	0	0
15	1	58	3	0			15	1	57	0	0
15	1	59	0	0			15	1	58	0	0
15	2	0	6	0			15	1	59	0	0
15	2	1	1	0			15	2	0	0	0
15	2	2	0	0			15	2	1	0	0
15	2	3	0	0			15	2	2	0	0
15	2	4	0	0			15	2	3	0	0
15	2	5	0	0			15	2	4	0	0
15	2	6	0	0			15	2	5	0	0
15	2	7	0	0			15	2	6	0	0
15	2	8	2	0			15	2	7	0	0
15	2	9	0	0			15	2	8	0	0
15	2	10	0	0			15	2	9	0	0
15	2	11	3	0			15	2	10	0	0
15	2	12	0	0			15	2	11	0	0
15	2	13	0	0			15	2	12	0	0
15	2	14	0	0			15	2	13	0	0
15	2	15	0	0			15	2	14	0	0
15	2	16	0	0			15	2	15	0	0
15	2	17	0	0			15	2	16	0	0
15	2	18	1	0			15	2	17	0	0
15	2	19	0	0			15	2	18	0	0
15	2	20	1	0			15	2	19	0	0
15	2	21	5	0			15	2	20	0	0
15	2	22	0	0			15	2	21	0	0
15	2	23	0	0			15	2	22	0	0
15	2	24	0	0			15	2	23	0	0
15	2	25	0	0			15	2	24	0	0
15	2	26	0	0			15	2	25	0	0
15	2	27	0	0			15	2	26	0	0
15	2	28	0	0			15	2	27	0	0
15	2	29	0	0			15	2	28	0	0
15	2	30	0	0			15	2	29	0	0
15	2	31	0	0			15	2	30	0	0
15	2	32	0	0			15	2	31	0	0
15	2	33	0	0			15	2	32	0	0
15	2	34	0	0			15	2	33	0	0
15	2	35	0	0			15	2	34	0	0
15	2	36	0	0			15	2	35	0	0
15	2	37	0	0			15	2	36	0	0
15	2	38	0	0			15	2	37	0	0
15	2	39	0	0			15	2	38	0	0
15	2	40	0	0			15	2	39	0	0
15	2	41	0	0			15	2	40	0	0
15	2	42	0	0			15	2	41	0	0
15	2	43	0	0			15	2	42	0	0
15	2	44	0	0			15	2	43	0	0
15	2	45	0	0			15	2	44	0	0
15	2	46	0	0			15	2	45	0	0
15	2	47	0	0			15	2	46	0	0
15	2	48	0	0			15	2	47	0	0
15	2	49	0	0			15	2	48	0	0
15	2	50	0	0			15	2	49	0	0
15	2	51	0	0			15	2	50	0	0
15	2	52	0	0			15	2	51	0	0
15	2	53	0	0			15	2	52	0	0
15	2	54	0	0			15	2	53	0	0
15	2	55	0	0			15	2	54	0	0
15	2	56	0	0			15	2	55	0	0
15	2	57	0	0			15	2	56	0	0
15	2	58	0	0			15	2	57	0	0
15	2	59	0	0			15	2	58	0	0
15	3	0	0	0			15	2	59	0	0
15	3	1	0	0			15	3	0	0	0
15	3	2	0	0			15	3	1	0	0
15	3	3	0	0			15	3	2	0	0
15	3	4	0	0			15	3	3	0	0
15	3	5	0	0			15	3	4	0	0
15	3	6	0	0			15	3	5	0	0
15	3	7	0	0			15	3	6	0	0
15	3	8	0	0			15	3	7	0	0
15	3	9	0	0			15	3	8	0	0
15	3	10	0	0			15	3	9	0	0
15	3	11	0	0			15	3	10	0	0
15	3	12	0	0			15	3	11	0	0
15	3	13	0	0			15	3	12	9	0
15	3	14	4	0			15	3	13	6	0
15	3	15	0	0			15	3	14	1	0
15	3	16	0	0			15	3	15	0	0
15	3	17	0	0			15	3	16	0	0
15	3	18	0	0			15	3	17	0	0
15	3	19	0	0			15	3	18	0	0
15	3	20	0	0			15	3	19	0	0
15	3	21	0	0			15	3	20	0	0
15	3	22	0	0			15	3	21	0	0
15	3	23	0	0			15	3	22	2	0
15	3	24	0	0			15	3	23	0	0
15	3	25	0	0			15	3	24	0	0
15	3	26	0	0			15	3	25	3	0
15	3	27	0	0			15	3	26	11	0
15	3	28	0	0			15	3	27	7	0
15	3	29	0	0			15	3	28	3	0
15	3	30	0	0			15	3	29	0	0
15	3	31	0	0			15	3	30	0	0
15	3	32	0	0			15	3	31	0	0
15	3	33	0	0			15	3	32	0	0
15	3	34	0	0			15	3	33	0	0
15	3	35	0	0			15	3	34	9	0
15	3	36	8	0			15	3	35	2	0
15	3	37	0	0			15	3	36	3	0
15	3	38	0	0			15	3	37	8	0
15	3	39	0	0			15	3	38	6	0
15	3	40	0	0			15	3	39	3	0
15	3	41	0	0			15	3	40	2	0
15	3	42	0	0			15	3	41	0	0
15	3	43	0	0			15	3	42	0	0
15	3	44	3	0			15	3	43	4	0
15	3	45	8	0			15	3	44	5	0
15	3	46	9	0			15	3	45	0	0
15	3	47	0	0			15	3	46	0	0
15	3	48	8	0			15	3	47	0	0
15	3	49	6	0			15	3	48	0	0
15	3	50	8	0			15	3	49	0	0
15	3	51	1	0			15	3	50	0	0
15	3	52	10	0			15	3	51	0	0
15	3	53	4	0			15	3	52	0	0
15	3	54	0	0			15	3	53	0	0
15	3	55	0	0			15	3	54	0	0
15	3	56	0	0			15	3	55	0	0
15	3	57	4	0			15	3	56	0	0
15	3	58	1	0			15	3	57	0	0
15	3	59	0	0			15	3	58	0	0
15	4	0	0	0			15	3	59	0	0
15	4	1	0	0			15	4	0	0	0
15	4	2	0	0			15	4	1	0	0
15	4	3	0	0			15	4	2	0	0
15	4	4	6	0			15	4	3	0	0
15	4	5	5	0			15	4	4	0	0
15	4	6	0	0			15	4	5	0	0
15	4	7	1	0			15	4	6	0	0
15	4	8	0	0			15	4	7	0	0
15	4	9	0	0			15	4	8	0	0
15	4	10	0	0			15	4	9	0	0
15	4	11	0	0			15	4	10	0	0
15	4	12	4	0			15	4	11	0	0
15	4	13	0	0			15	4	12	0	0
15	4	14	0	0			15	4	13	0	0
15	4	15	0	0			15	4	14	0	0
15	4	16	0	0			15	4	15	0	0
15	4	17	0	0			15	4	16	0	0
15	4	18	0	0			15	4	17	0	0
15	4	19	0	0			15	4	18	0	0
15	4	20	0	0			15	4	19	0	0
15	4	21	0	0			15	4	20	0	0
15	4	22	0	0			15	4	21	0	0
15	4	23	0	0			15	4	22	0	0
15	4	24	2	0			15	4	23	0	0
15	4	25	11	0			15	4	24	0	0
15	4	26	1	0			15	4	25	0	0
15	4	27	4	0			15	4	26	0	0
15	4	28	0	0			15	4	27	0	0
15	4	29	0	0			15	4	28	0	0
15	4	30	0	0			15	4	29	0	0
15	4	31	0	0			15	4	30	0	0
15	4	32	5	0			15	4	31	0	0
15	4	33	5	0			15	4	32	0	0
15	4	34	0	0			15	4	33	0	0
15	4	35	7	0			15	4	34	0	0
15	4	36	13	0			15	4	35	0	0
15	4	37	4	0			15	4	36	0	0
15	4	38	0	0			15	4	37	0	0
15	4	39	0	0			15	4	38	0	0
15	4	40	1	0			15	4	39	0	0
15	4	41	0	0			15	4	40	0	0
15	4	42	0	0			15	4	41	0	0
15	4	43	0	0			15	4	42	0	0
15	4	44	0	0			15	4	43	0	0
15	4	45	0	0			15	4	44	0	0
15	4	46	0	0			15	4	45	0	0
15	4	47	0	0			15	4	46	0	0
15	4	48	0	0			15	4	47	0	0
15	4	49	0	0			15	4	48	0	0
15	4	50	0	0			15	4	49	0	0
15	4	51	0	0			15	4	50	0	0
15	4	52	0	0			15	4	51	0	0
15	4	53	0	0			15	4	52	0	0
15	4	54	0	0			15	4	53	0	0
15	4	55	0	0			15	4	54	0	0
15	4	56	0	0			15	4	55	0	0
15	4	57	0	0			15	4	56	0	0
15	4	58	0	0			15	4	57	0	0
15	4	59	0	0			15	4	58	0	0
15	5	0	0	0			15	4	59	0	0
15	5	1	0	0			15	5	0	0	0
15	5	2	0	0			15	5	1	6	0
15	5	3	0	0			15	5	2	0	0
15	5	4	0	0			15	5	3	0	0
15	5	5	0	0			15	5	4	2	0
15	5	6	0	0			15	5	5	0	0
15	5	7	0	0			15	5	6	0	0
15	5	8	0	0			15	5	7	0	0
15	5	9	0	0			15	5	8	0	0
15	5	10	0	0			15	5	9	0	0
15	5	11	0	0			15	5	10	0	0
15	5	12	0	0			15	5	11	0	0
15	5	13	0	0			15	5	12	0	0
15	5	14	0	0			15	5	13	0	0
15	5	15	0	0			15	5	14	0	0
15	5	16	0	0			15	5	15	3	0
15	5	17	0	0			15	5	16	10	0
15	5	18	0	0			15	5	17	11	0
15	5	19	0	0			15	5	18	1	0
15	5	20	0	0			15	5	19	2	0
15	5	21	0	0			15	5	20	0	0
15	5	22	0	0			15	5	21	0	0
15	5	23	0	0			15	5	22	5	0
15	5	24	0	0			15	5	23	0	0
15	5	25	0	0			15	5	24	0	0
15	5	26	0	0			15	5	25	7	0
15	5	27	0	0			15	5	26	4	0
15	5	28	0	0			15	5	27	10	0
15	5	29	0	0			15	5	28	0	0
15	5	30	0	0			15	5	29	5	0
15	5	31	0	0			15	5	30	10	0
15	5	32	0	0			15	5	31	0	0
15	5	33	0	0			15	5	32	13	0
15	5	34	0	0			15	5	33	7	0
15	5	35	2	0			15	5	34	0	0
15	5	36	1	0			15	5	35	1	0
15	5	37	0	0			15	5	36	11	0
15	5	38	4	0			15	5	37	5	0
15	5	39	4	0			15	5	38	2	0
15	5	40	1	0			15	5	39	0	0
15	5	41	0	0			15	5	40	0	0
15	5	42	0	0			15	5	41	0	0
15	5	43	0	0			15	5	42	0	0
15	5	44	0	0			15	5	43	0	0
15	5	45	0	0			15	5	44	0	0
15	5	46	0	0			15	5	45	0	0
15	5	47	0	0			15	5	46	5	0
15	5	48	0	0			15	5	47	0	0
15	5	49	0	0			15	5	48	1	0
15	5	50	10	0			15	5	49	0	0
15	5	51	9	0			15	5	50	0	0
15	5	52	2	0			15	5	51	0	0
15	5	53	3	0			15	5	52	0	0
15	5	54	0	0			15	5	53	4	0
15	5	55	4	0			15	5	54	2	0
15	5	56	4	0			15	5	55	0	0
15	5	57	9	0			15	5	56	0	0
15	5	58	7	0			15	5	57	0	0
15	5	59	5	0			15	5	58	7	0
15	6	0	2	0			15	5	59	5	0
15	6	1	0	0			15	6	0	0	0
15	6	2	6	0			15	6	1	5	0
15	6	3	0	0			15	6	2	12	0
15	6	4	0	0			15	6	3	8	0
15	6	5	0	0			15	6	4	10	0
15	6	6	0	0			15	6	5	0	0
15	6	7	1	0			15	6	6	1	0
15	6	8	0	0			15	6	7	1	0
15	6	9	0	0			15	6	8	1	0
15	6	10	0	0			15	6	9	0	0
15	6	11	0	0			15	6	10	0	0
15	6	12	1	0			15	6	11	0	0
15	6	13	1	0			15	6	12	0	0
15	6	14	0	0			15	6	13	0	0
15	6	15	0	0			15	6	14	0	0
15	6	16	4	0			15	6	15	0	0
15	6	17	0	0			15	6	16	0	0
15	6	18	0	0			15	6	17	0	0
15	6	19	0	0			15	6	18	0	0
15	6	20	0	0			15	6	19	0	0
15	6	21	6	0			15	6	20	0	0
15	6	22	4	0			15	6	21	0	0
15	6	23	1	0			15	6	22	0	0
15	6	24	0	0			15	6	23	0	0
15	6	25	0	0			15	6	24	0	0
15	6	26	0	0			15	6	25	0	0
15	6	27	0	0			15	6	26	0	0
15	6	28	0	0			15	6	27	0	0
15	6	29	0	0			15	6	28	0	0
15	6	30	0	0			15	6	29	0	0
15	6	31	0	0			15	6	30	0	0
15	6	32	0	0			15	6	31	0	0
15	6	33	0	0			15	6	32	0	0
15	6	34	0	0			15	6	33	0	0
15	6	35	0	0			15	6	34	0	0
15	6	36	0	0			15	6	35	0	0
15	6	37	0	0			15	6	36	0	0
15	6	38	0	0			15	6	37	0	0
15	6	39	0	0			15	6	38	0	0
15	6	40	0	0			15	6	39	0	0
15	6	41	0	0			15	6	40	0	0
15	6	42	2	0			15	6	41	0	0
15	6	43	3	0			15	6	42	0	0
15	6	44	2	0			15	6	43	0	0
15	6	45	0	0			15	6	44	0	0
15	6	46	1	0			15	6	45	0	0
15	6	47	0	0			15	6	46	0	0
15	6	48	0	0			15	6	47	0	0
15	6	49	2	0			15	6	48	0	0
15	6	50	0	0			15	6	49	0	0
15	6	51	0	0			15	6	50	0	0
15	6	52	0	0			15	6	51	0	0
15	6	53	0	0			15	6	52	0	0
15	6	54	0	0			15	6	53	0	0
15	6	55	0	0			15	6	54	10	0
15	6	56	0	0			15	6	55	0	0
15	6	57	0	0			15	6	56	2	0
15	6	58	0	0			15	6	57	3	0
15	6	59	0	0			15	6	58	0	0
15	7	0	0	0			15	6	59	0	0
15	7	1	0	0			15	7	0	0	0
15	7	2	0	0			15	7	1	1	0
15	7	3	0	0			15	7	2	11	0
15	7	4	0	0			15	7	3	13	0
15	7	5	0	0			15	7	4	6	0
15	7	6	0	0			15	7	5	8	0
15	7	7	0	0			15	7	6	4	0
15	7	8	0	0			15	7	7	2	0
15	7	9	0	0			15	7	8	3	0
15	7	10	0	0			15	7	9	0	0
15	7	11	0	0			15	7	10	0	0
15	7	12	0	0			15	7	11	0	0
15	7	13	0	0			15	7	12	0	0
15	7	14	0	0			15	7	13	0	0
15	7	15	0	0			15	7	14	0	0
15	7	16	0	0			15	7	15	0	0
15	7	17	0	0			15	7	16	0	0
15	7	18	0	0			15	7	17	0	0
15	7	19	0	0			15	7	18	0	0
15	7	20	0	0			15	7	19	0	0
15	7	21	0	0			15	7	20	0	0
15	7	22	0	0			15	7	21	0	0
15	7	23	0	0			15	7	22	0	0
15	7	24	0	0			15	7	23	0	0
15	7	25	0	0			15	7	24	0	0
15	7	26	0	0			15	7	25	0	0
15	7	27	0	0			15	7	26	0	0
15	7	28	0	0			15	7	27	0	0
15	7	29	0	0			15	7	28	0	0
15	7	30	0	0			15	7	29	0	0
15	7	31	0	0			15	7	30	0	0
15	7	32	0	0			15	7	31	0	0
15	7	33	0	0			15	7	32	0	0
15	7	34	0	0			15	7	33	0	0
15	7	35	0	0			15	7	34	0	0
15	7	36	0	0			15	7	35	0	0
15	7	37	0	0			15	7	36	0	0
15	7	38	0	0			15	7	37	0	0
15	7	39	0	0			15	7	38	0	0
15	7	40	0	0			15	7	39	0	0
15	7	41	0	0			15	7	40	0	0
15	7	42	0	0			15	7	41	0	0
15	7	43	0	0			15	7	42	0	0
15	7	44	0	0			15	7	43	0	0
15	7	45	3	0			15	7	44	0	0
15	7	46	4	0			15	7	45	0	0
15	7	47	0	0			15	7	46	0	0
15	7	48	0	0			15	7	47	0	0
15	7	49	0	0			15	7	48	0	0
15	7	50	0	0			15	7	49	0	0
15	7	51	7	0			15	7	50	0	0
15	7	52	2	0			15	7	51	0	0
15	7	53	9	0			15	7	52	0	0
15	7	54	2	0			15	7	53	0	0
15	7	55	0	0			15	7	54	0	0
15	7	56	0	0			15	7	55	0	0
15	7	57	0	0			15	7	56	0	0
15	7	58	2	0			15	7	57	0	0
15	7	59	0	0			15	7	58	0	0
15	8	0	0	0			15	7	59	0	0
15	8	1	13	0			15	8	0	0	0
15	8	2	6	0			15	8	1	0	0
15	8	3	12	0			15	8	2	0	0
15	8	4	8	0			15	8	3	0	0
15	8	5	2	0			15	8	4	3	0
15	8	6	6	0			15	8	5	9	0
15	8	7	2	0			15	8	6	1	0
15	8	8	0	0			15	8	7	3	0
15	8	9	0	0			15	8	8	4	0
15	8	10	0	0			15	8	9	4	0
15	8	11	0	0			15	8	10	0	0
15	8	12	0	0			15	8	11	0	0
15	8	13	0	0			15	8	12	0	0
15	8	14	0	0			15	8	13	0	0
15	8	15	0	0			15	8	14	2	0
15	8	16	0	0			15	8	15	7	0
15	8	17	0	0			15	8	16	0	0
15	8	18	0	0			15	8	17	1	0
15	8	19	0	0			15	8	18	7	0
15	8	20	0	0			15	8	19	9	0
15	8	21	0	0			15	8	20	0	0
15	8	22	0	0			15	8	21	1	0
15	8	23	0	0			15	8	22	8	0
15	8	24	0	0			15	8	23	3	0
15	8	25	0	0			15	8	24	0	0
15	8	26	0	0			15	8	25	3	0
15	8	27	0	0			15	8	26	5	0
15	8	28	0	0			15	8	27	0	0
15	8	29	0	0			15	8	28	0	0
15	8	30	0	0			15	8	29	14	0
15	8	31	0	0			15	8	30	3	0
15	8	32	0	0			15	8	31	4	0
15	8	33	0	0			15	8	32	11	0
15	8	34	0	0			15	8	33	0	0
15	8	35	0	0			15	8	34	4	0
15	8	36	0	0			15	8	35	3	0
15	8	37	0	0			15	8	36	0	0
15	8	38	0	0			15	8	37	1	0
15	8	39	0	0			15	8	38	11	0
15	8	40	0	0			15	8	39	1	0
15	8	41	0	0			15	8	40	1	0
15	8	42	0	0			15	8	41	13	0
15	8	43	0	0			15	8	42	4	0
15	8	44	0	0			15	8	43	0	0
15	8	45	0	0			15	8	44	0	0
15	8	46	0	0			15	8	45	0	0
15	8	47	0	0			15	8	46	0	0
15	8	48	0	0			15	8	47	0	0
15	8	49	0	0			15	8	48	0	0
15	8	50	0	0			15	8	49	0	0
15	8	51	0	0			15	8	50	0	0
15	8	52	0	0			15	8	51	0	0
15	8	53	0	0			15	8	52	0	0
15	8	54	0	0			15	8	53	0	0
15	8	55	0	0			15	8	54	0	0
15	8	56	0	0			15	8	55	0	0
15	8	57	0	0			15	8	56	0	0
15	8	58	0	0			15	8	57	0	0
15	8	59	0	0			15	8	58	0	0
15	9	0	0	0			15	8	59	0	0
15	9	1	0	0			15	9	0	0	0
15	9	2	0	0			15	9	1	0	0
15	9	3	0	0			15	9	2	0	0
15	9	4	0	0			15	9	3	2	0
15	9	5	0	0			15	9	4	1	0
15	9	6	3	0			15	9	5	0	0
15	9	7	3	0			15	9	6	0	0
15	9	8	0	0			15	9	7	1	0
15	9	9	0	0			15	9	8	0	0
15	9	10	12	0			15	9	9	0	0
15	9	11	1	0			15	9	10	0	0
15	9	12	4	0			15	9	11	0	0
15	9	13	5	0			15	9	12	0	0
15	9	14	0	0			15	9	13	0	0
15	9	15	5	0			15	9	14	0	0
15	9	16	11	0			15	9	15	0	0
15	9	17	0	0			15	9	16	0	0
[truncated: 39,764 more rows]

## Sheet: B
A9737				A9739				A9740				A9742
Period (hr)	Amplitude	Significance		Period (hr)	Amplitude	Significance		Period (hr)	Amplitude	Significance		Period (hr)	Amplitude	Significance
0	NaN	NaN		0	NaN	NaN		0	NaN	NaN		0	NaN	NaN
0.02	0	11.16		0.02	0	11.16		0.02	0	11.16		0.02	0	11.16
0.03	0.08	14.13		0.03	0.1	14.13		0.03	0	14.13		0.03	0.34	14.13
0.05	0.04	16.55		0.05	0.47	16.55		0.05	0.03	16.55		0.05	0.12	16.55
0.07	1.42	18.72		0.07	0.67	18.72		0.07	0.55	18.72		0.07	1.07	18.72
0.08	4.07	20.75		0.08	3.28	20.75		0.08	1.18	20.75		0.08	0.61	20.75
0.1	5.09	22.67		0.1	0.91	22.67		0.1	2.02	22.67		0.1	1.21	22.67
0.12	0.68	24.52		0.12	1.59	24.52		0.12	3.44	24.52		0.12	0.89	24.52
0.13	4.82	26.32		0.13	3.98	26.32		0.13	2.77	26.32		0.13	10.72	26.32
0.15	7.21	28.06		0.15	2.27	28.06		0.15	2.45	28.06		0.15	2.01	28.06
0.17	9.99	29.76		0.17	3.73	29.76		0.17	2.64	29.76		0.17	2.15	29.76
0.18	15.74	31.43		0.18	7.16	31.43		0.18	11.45	31.43		0.18	7.39	31.43
0.2	9.48	33.07		0.2	8.48	33.07		0.2	6.42	33.07		0.2	6.13	33.07
0.22	4.22	34.68		0.22	9.18	34.68		0.22	15.67	34.68		0.22	5.26	34.68
0.23	4.71	36.27		0.23	10.19	36.27		0.23	14.87	36.27		0.23	21.27	36.27
0.25	12.43	37.84		0.25	12.92	37.84		0.25	9.21	37.84		0.25	3.39	37.84
0.27	5.86	39.39		0.27	9.72	39.39		0.27	4.88	39.39		0.27	25.77	39.39
0.28	9.84	40.92		0.28	20.57	40.92		0.28	12.83	40.92		0.28	12.32	40.92
0.3	17.1	42.44		0.3	10	42.44		0.3	11	42.44		0.3	10.82	42.44
0.32	10.72	43.95		0.32	12.74	43.95		0.32	30.91	43.95		0.32	13.82	43.95
0.33	16.96	45.44		0.33	18.71	45.44		0.33	10.18	45.44		0.33	10.87	45.44
0.35	9.45	46.92		0.35	7.83	46.92		0.35	13.98	46.92		0.35	17.07	46.92
0.37	19.25	48.38		0.37	14.04	48.38		0.37	20.1	48.38		0.37	10.87	48.38
0.38	21.3	49.84		0.38	12.97	49.84		0.38	38.58	49.84		0.38	25.89	49.84
0.4	32.57	51.29		0.4	26.24	51.29		0.4	21.22	51.29		0.4	31.9	51.29
0.42	16.18	52.73		0.42	13.73	52.73		0.42	27.36	52.73		0.42	24.63	52.73
0.43	22.11	54.16		0.43	26.33	54.16		0.43	22	54.16		0.43	11.69	54.16
0.45	23.9	55.58		0.45	26.82	55.58		0.45	12.53	55.58		0.45	26.06	55.58
0.47	10.46	57		0.47	15.82	57		0.47	28.69	57		0.47	37.81	57
0.48	35.01	58.4		0.48	26.86	58.4		0.48	24.19	58.4		0.48	23.45	58.4
0.5	35.16	59.8		0.5	15.31	59.8		0.5	16.24	59.8		0.5	13.46	59.8
0.52	25.78	61.2		0.52	20.6	61.2		0.52	28.42	61.2		0.52	23.81	61.2
0.53	13.71	62.58		0.53	17.67	62.58		0.53	16.42	62.58		0.53	42.33	62.58
0.55	54.82	63.96		0.55	26.26	63.96		0.55	23	63.96		0.55	21.85	63.96
0.57	23.98	65.34		0.57	39.33	65.34		0.57	31.05	65.34		0.57	27.9	65.34
0.58	15.13	66.71		0.58	31.81	66.71		0.58	20.28	66.71		0.58	20.3	66.71
0.6	31.68	68.08		0.6	35.37	68.08		0.6	28.45	68.08		0.6	24.37	68.08
0.62	25.81	69.44		0.62	37.95	69.44		0.62	27.66	69.44		0.62	44.21	69.44
0.63	29.29	70.79		0.63	26.28	70.79		0.63	45.92	70.79		0.63	36.96	70.79
0.65	24.94	72.14		0.65	43.4	72.14		0.65	31.43	72.14		0.65	26.56	72.14
0.67	41.93	73.49		0.67	36.22	73.49		0.67	27.35	73.49		0.67	37.68	73.49
0.68	45.02	74.83		0.68	45.01	74.83		0.68	37.43	74.83		0.68	31.6	74.83
0.7	29.01	76.17		0.7	26.4	76.17		0.7	32.29	76.17		0.7	47.99	76.17
0.72	46.49	77.5		0.72	46.57	77.5		0.72	35.25	77.5		0.72	38.4	77.5
0.73	42.79	78.83		0.73	50.58	78.83		0.73	35.58	78.83		0.73	29.56	78.83
0.75	36.61	80.16		0.75	33.36	80.16		0.75	53.83	80.16		0.75	29.7	80.16
0.77	46.22	81.48		0.77	41.21	81.48		0.77	66.23	81.48		0.77	38.49	81.48
0.78	60.02	82.8		0.78	31.16	82.8		0.78	24.52	82.8		0.78	37.22	82.8
0.8	55.35	84.11		0.8	40.92	84.11		0.8	32.37	84.11		0.8	57.7	84.11
0.82	34.31	85.43		0.82	39.1	85.43		0.82	33.03	85.43		0.82	57.21	85.43
0.83	33.35	86.74		0.83	42.77	86.74		0.83	47.24	86.74		0.83	51.12	86.74
0.85	41.81	88.04		0.85	58.05	88.04		0.85	39.55	88.04		0.85	32.97	88.04
0.87	45.67	89.35		0.87	54.41	89.35		0.87	41.75	89.35		0.87	29.23	89.35
0.88	37.33	90.65		0.88	68.18	90.65		0.88	42.82	90.65		0.88	35.49	90.65
0.9	61.08	91.94		0.9	53.5	91.94		0.9	35.46	91.94		0.9	49.27	91.94
0.92	71.9	93.24		0.92	43.52	93.24		0.92	49.98	93.24		0.92	31.23	93.24
0.93	27.33	94.53		0.93	57.81	94.53		0.93	50.22	94.53		0.93	64.67	94.53
0.95	45.54	95.82		0.95	35.66	95.82		0.95	58.14	95.82		0.95	34.33	95.82
0.97	53.33	97.11		0.97	56.66	97.11		0.97	62.17	97.11		0.97	45.03	97.11
0.98	61.77	98.39		0.98	69.94	98.39		0.98	66.29	98.39		0.98	45.77	98.39
1	57.84	99.68		1	52.98	99.68		1	39.85	99.68		1	56.29	99.68
1.02	62.34	100.96		1.02	35.85	100.96		1.02	60.57	100.96		1.02	39.95	100.96
1.03	54.27	102.23		1.03	58.6	102.23		1.03	59.17	102.23		1.03	52.16	102.23
1.05	42.93	103.51		1.05	55.18	103.51		1.05	44.77	103.51		1.05	81.62	103.51
1.07	45.51	104.78		1.07	59.13	104.78		1.07	53.27	104.78		1.07	66.04	104.78
1.08	54.23	106.05		1.08	59.98	106.05		1.08	50.67	106.05		1.08	49.19	106.05
1.1	85.39	107.32		1.1	51.61	107.32		1.1	84.24	107.32		1.1	40.19	107.32
1.12	66.37	108.59		1.12	61.82	108.59		1.12	62.12	108.59		1.12	78.36	108.59
1.13	55.02	109.85		1.13	83.44	109.85		1.13	58.59	109.85		1.13	48.71	109.85
1.15	52.09	111.12		1.15	83.82	111.12		1.15	80.95	111.12		1.15	58.59	111.12
1.17	51.17	112.38		1.17	89.83	112.38		1.17	47.68	112.38		1.17	96.28	112.38
1.18	99.11	113.64		1.18	106.3	113.64		1.18	59.64	113.64		1.18	70.83	113.64
1.2	83.04	114.9		1.2	65.85	114.9		1.2	72.52	114.9		1.2	77.77	114.9
1.22	70.32	116.15		1.22	102.75	116.15		1.22	55.91	116.15		1.22	49.69	116.15
1.23	50.48	117.41		1.23	49.48	117.41		1.23	66.06	117.41		1.23	73.06	117.41
1.25	48.99	118.66		1.25	84.71	118.66		1.25	67.72	118.66		1.25	80.94	118.66
1.27	60.31	119.91		1.27	47.85	119.91		1.27	75.31	119.91		1.27	88.62	119.91
1.28	67.5	121.16		1.28	73.14	121.16		1.28	84.01	121.16		1.28	57.31	121.16
1.3	70.31	122.41		1.3	103.81	122.41		1.3	54.09	122.41		1.3	61.35	122.41
1.32	96.33	123.65		1.32	136.82	123.65		1.32	59.47	123.65		1.32	66.83	123.65
1.33	87.05	124.9		1.33	75.97	124.9		1.33	60.86	124.9		1.33	77.13	124.9
1.35	53.89	126.14		1.35	80.88	126.14		1.35	70.07	126.14		1.35	65.65	126.14
1.37	66.87	127.38		1.37	97.56	127.38		1.37	95.88	127.38		1.37	71.59	127.38
1.38	107.35	128.62		1.38	105.48	128.62		1.38	70.49	128.62		1.38	84.89	128.62
1.4	54.21	129.86		1.4	56.33	129.86		1.4	99.84	129.86		1.4	90.45	129.86
1.42	70.05	131.1		1.42	95.76	131.1		1.42	115.71	131.1		1.42	88.46	131.1
1.43	83.95	132.33		1.43	85.16	132.33		1.43	90.65	132.33		1.43	69.5	132.33
1.45	108.44	133.57		1.45	75.37	133.57		1.45	73.26	133.57		1.45	69.62	133.57
1.47	71.66	134.8		1.47	88.66	134.8		1.47	68.69	134.8		1.47	98.66	134.8
1.48	109.81	136.03		1.48	111.71	136.03		1.48	75.74	136.03		1.48	70.49	136.03
1.5	76.05	137.26		1.5	81.58	137.26		1.5	83.01	137.26		1.5	61.21	137.26
1.52	58.11	138.49		1.52	68.56	138.49		1.52	83.9	138.49		1.52	67.33	138.49
1.53	75.62	139.72		1.53	76.61	139.72		1.53	127.18	139.72		1.53	63.06	139.72
1.55	84.08	140.95		1.55	71.33	140.95		1.55	137.55	140.95		1.55	90.89	140.95
1.57	114.66	142.17		1.57	81.47	142.17		1.57	73.83	142.17		1.57	101.13	142.17
1.58	111.63	143.4		1.58	100.96	143.4		1.58	103.82	143.4		1.58	67.18	143.4
1.6	79.32	144.62		1.6	82.58	144.62		1.6	58.11	144.62		1.6	110.29	144.62
1.62	121.75	145.84		1.62	112.05	145.84		1.62	97.46	145.84		1.62	61.6	145.84
1.63	83.02	147.06		1.63	106.28	147.06		1.63	81.51	147.06		1.63	133.2	147.06
1.65	118.35	148.28		1.65	73.86	148.28		1.65	108.42	148.28		1.65	92.32	148.28
1.67	96.82	149.5		1.67	134.51	149.5		1.67	94.91	149.5		1.67	117.08	149.5
1.68	107.87	150.72		1.68	106.96	150.72		1.68	132.5	150.72		1.68	73.13	150.72
1.7	90.46	151.93		1.7	103.16	151.93		1.7	113.43	151.93		1.7	104.25	151.93
1.72	86.48	153.15		1.72	134.28	153.15		1.72	95.31	153.15		1.72	69.65	153.15
1.73	79.23	154.36		1.73	101.25	154.36		1.73	100.45	154.36		1.73	90.31	154.36
1.75	101.03	155.58		1.75	99.94	155.58		1.75	107.76	155.58		1.75	93	155.58
1.77	87.4	156.79		1.77	113.22	156.79		1.77	119.43	156.79		1.77	67.02	156.79
1.78	86.17	158		1.78	110.53	158		1.78	66.23	158		1.78	79.63	158
1.8	109.14	159.21		1.8	112.18	159.21		1.8	107.34	159.21		1.8	92.87	159.21
1.82	125.38	160.42		1.82	97.59	160.42		1.82	98.12	160.42		1.82	128.8	160.42
1.83	154.17	161.63		1.83	84.89	161.63		1.83	164.9	161.63		1.83	78.39	161.63
1.85	90.57	162.84		1.85	109.9	162.84		1.85	73.3	162.84		1.85	152.47	162.84
1.87	78.92	164.04		1.87	94.16	164.04		1.87	93.15	164.04		1.87	111.74	164.04
1.88	104.54	165.25		1.88	77.86	165.25		1.88	72.6	165.25		1.88	99.41	165.25
1.9	100.16	166.45		1.9	83.74	166.45		1.9	106.4	166.45		1.9	99.42	166.45
1.92	139.07	167.66		1.92	116.07	167.66		1.92	132.17	167.66		1.92	121.61	167.66
1.93	109.52	168.86		1.93	127.91	168.86		1.93	108.4	168.86		1.93	97.74	168.86
1.95	82.89	170.06		1.95	103.57	170.06		1.95	108.69	170.06		1.95	112.06	170.06
1.97	126.28	171.26		1.97	119.84	171.26		1.97	111.65	171.26		1.97	116.01	171.26
1.98	117.6	172.46		1.98	113.87	172.46		1.98	128.77	172.46		1.98	123.41	172.46
2	140.22	173.66		2	122.27	173.66		2	91.28	173.66		2	122.8	173.66
2.02	125.66	174.86		2.02	111.84	174.86		2.02	136.07	174.86		2.02	81.18	174.86
2.03	116.8	176.06		2.03	92.91	176.06		2.03	125.56	176.06		2.03	135.59	176.06
2.05	112.06	177.26		2.05	104.83	177.26		2.05	135.95	177.26		2.05	182.92	177.26
2.07	109.42	178.45		2.07	124.7	178.45		2.07	131.06	178.45		2.07	113.68	178.45
2.08	132.89	179.65		2.08	85.19	179.65		2.08	117.06	179.65		2.08	153.08	179.65
2.1	122.12	180.84		2.1	111.56	180.84		2.1	105.1	180.84		2.1	160.07	180.84
2.12	139.53	182.04		2.12	135.78	182.04		2.12	142.21	182.04		2.12	129.14	182.04
2.13	112.81	183.23		2.13	122.35	183.23		2.13	102.4	183.23		2.13	121.26	183.23
2.15	147.2	184.42		2.15	122.38	184.42		2.15	146.76	184.42		2.15	212.66	184.42
2.17	109.98	185.61		2.17	112.25	185.61		2.17	99.25	185.61		2.17	116.82	185.61
2.18	134.24	186.81		2.18	118.82	186.81		2.18	165.51	186.81		2.18	128.19	186.81
2.2	139.82	188		2.2	150.58	188		2.2	129.74	188		2.2	97.94	188
2.22	127.54	189.19		2.22	133.45	189.19		2.22	142.24	189.19		2.22	162.41	189.19
2.23	188	190.37		2.23	115.82	190.37		2.23	117.77	190.37		2.23	155.22	190.37
2.25	124.68	191.56		2.25	111.12	191.56		2.25	144.74	191.56		2.25	217.73	191.56
2.27	132.21	192.75		2.27	156.99	192.75		2.27	137.7	192.75		2.27	165.19	192.75
2.28	126.07	193.94		2.28	132.59	193.94		2.28	180.55	193.94		2.28	128.68	193.94
2.3	128.48	195.12		2.3	148.74	195.12		2.3	135.3	195.12		2.3	115.6	195.12
2.32	105.38	196.31		2.32	143.71	196.31		2.32	127.1	196.31		2.32	175.03	196.31
2.33	95.96	197.49		2.33	155.5	197.49		2.33	122.1	197.49		2.33	168.62	197.49
2.35	209.28	198.68		2.35	117.43	198.68		2.35	95.37	198.68		2.35	247.75	198.68
2.37	173.42	199.86		2.37	219.74	199.86		2.37	216.08	199.86		2.37	132.73	199.86
2.38	126.33	201.04		2.38	166.43	201.04		2.38	142.36	201.04		2.38	104.28	201.04
2.4	177.93	202.22		2.4	143.16	202.22		2.4	109.87	202.22		2.4	150.63	202.22
2.42	170.29	203.41		2.42	144.67	203.41		2.42	133.3	203.41		2.42	133.28	203.41
2.43	125.84	204.59		2.43	183.07	204.59		2.43	151.97	204.59		2.43	172.76	204.59
2.45	148.36	205.77		2.45	133.43	205.77		2.45	144.97	205.77		2.45	153.14	205.77
2.47	148.92	206.95		2.47	107.19	206.95		2.47	135.71	206.95		2.47	113.07	206.95
2.48	125.42	208.13		2.48	133.85	208.13		2.48	132.41	208.13		2.48	138.65	208.13
2.5	135.57	209.3		2.5	155.09	209.3		2.5	114.51	209.3		2.5	159.88	209.3
2.52	137.12	210.48		2.52	177.87	210.48		2.52	133.12	210.48		2.52	223.18	210.48
2.53	129.72	211.66		2.53	123.68	211.66		2.53	144.68	211.66		2.53	203.42	211.66
2.55	142.89	212.84		2.55	155.52	212.84		2.55	133.91	212.84		2.55	150.71	212.84
2.57	142.08	214.01		2.57	151.44	214.01		2.57	189.41	214.01		2.57	143.07	214.01
2.58	176.49	215.19		2.58	165.26	215.19		2.58	141.27	215.19		2.58	116.16	215.19
2.6	127.16	216.36		2.6	229.35	216.36		2.6	145.77	216.36		2.6	159.35	216.36
2.62	160.76	217.54		2.62	140.99	217.54		2.62	149.65	217.54		2.62	131.46	217.54
2.63	187.54	218.71		2.63	216.06	218.71		2.63	114.25	218.71		2.63	178.58	218.71
2.65	137.85	219.88		2.65	221.61	219.88		2.65	130.93	219.88		2.65	154.93	219.88
2.67	165.94	221.06		2.67	141.35	221.06		2.67	136.81	221.06		2.67	190.86	221.06
2.68	143.87	222.23		2.68	220.85	222.23		2.68	179.56	222.23		2.68	187.65	222.23
2.7	142.37	223.4		2.7	175.37	223.4		2.7	207.94	223.4		2.7	155.72	223.4
2.72	122.3	224.57		2.72	168.2	224.57		2.72	191.75	224.57		2.72	140.76	224.57
2.73	136.98	225.74		2.73	167.79	225.74		2.73	161.46	225.74		2.73	159.58	225.74
2.75	205.48	226.91		2.75	211.99	226.91		2.75	215.63	226.91		2.75	118.32	226.91
2.77	209.61	228.08		2.77	172.83	228.08		2.77	164.95	228.08		2.77	161.76	228.08
2.78	145.5	229.25		2.78	182.79	229.25		2.78	176.59	229.25		2.78	236.49	229.25
2.8	161.46	230.42		2.8	154.17	230.42		2.8	173.39	230.42		2.8	179.59	230.42
2.82	138.34	231.59		2.82	169.3	231.59		2.82	162.75	231.59		2.82	206.65	231.59
2.83	175.59	232.76		2.83	193.85	232.76		2.83	208.19	232.76		2.83	159.76	232.76
2.85	134.38	233.92		2.85	169.16	233.92		2.85	175.71	233.92		2.85	122.29	233.92
2.87	150.79	235.09		2.87	174.98	235.09		2.87	159.07	235.09		2.87	181.04	235.09
2.88	156.85	236.26		2.88	180.42	236.26		2.88	131.37	236.26		2.88	145.24	236.26
2.9	174.64	237.42		2.9	174.5	237.42		2.9	152.76	237.42		2.9	161.6	237.42
2.92	153.14	238.59		2.92	219.91	238.59		2.92	172.14	238.59		2.92	136.26	238.59
2.93	146.29	239.75		2.93	185.22	239.75		2.93	141.84	239.75		2.93	267.9	239.75
2.95	146.93	240.92		2.95	243.04	240.92		2.95	202.6	240.92		2.95	165	240.92
2.97	198.05	242.08		2.97	225.98	242.08		2.97	160.53	242.08		2.97	160.93	242.08
2.98	155.23	243.24		2.98	184.11	243.24		2.98	189.59	243.24		2.98	172.27	243.24
3	152.64	244.41		3	208.84	244.41		3	183.61	244.41		3	165.09	244.41
3.02	173.19	245.57		3.02	177.94	245.57		3.02	188.37	245.57		3.02	178.05	245.57
3.03	171.33	246.73		3.03	169.16	246.73		3.03	173.56	246.73		3.03	153.91	246.73
3.05	177.7	247.89		3.05	164.59	247.89		3.05	150.98	247.89		3.05	176.69	247.89
3.07	171.2	249.05		3.07	167.58	249.05		3.07	201.32	249.05		3.07	150.52	249.05
3.08	166.34	250.21		3.08	190.6	250.21		3.08	175.28	250.21		3.08	165.66	250.21
3.1	194.73	251.37		3.1	159.88	251.37		3.1	241.72	251.37		3.1	176.79	251.37
3.12	141.97	252.53		3.12	194.3	252.53		3.12	167.3	252.53		3.12	152.75	252.53
3.13	190.69	253.69		3.13	146.61	253.69		3.13	161.18	253.69		3.13	208	253.69
3.15	174.06	254.85		3.15	197	254.85		3.15	150.38	254.85		3.15	198.89	254.85
3.17	203.92	256.01		3.17	177.99	256.01		3.17	174.96	256.01		3.17	188.49	256.01
3.18	127.85	257.17		3.18	216.69	257.17		3.18	200.8	257.17		3.18	170.22	257.17
3.2	151.79	258.33		3.2	187.86	258.33		3.2	132.68	258.33		3.2	195.02	258.33
3.22	207.69	259.48		3.22	152.88	259.48		3.22	200.44	259.48		3.22	225.68	259.48
3.23	224.45	260.64		3.23	207.33	260.64		3.23	192.93	260.64		3.23	160.52	260.64
3.25	210.33	261.8		3.25	225.5	261.8		3.25	180.34	261.8		3.25	216.32	261.8
3.27	156.11	262.95		3.27	232.97	262.95		3.27	216.22	262.95		3.27	239.92	262.95
3.28	203.68	264.11		3.28	207.08	264.11		3.28	198.44	264.11		3.28	232.5	264.11
3.3	218.91	265.26		3.3	167.44	265.26		3.3	236.71	265.26		3.3	195.1	265.26
3.32	198.82	266.42		3.32	265.78	266.42		3.32	231.24	266.42		3.32	180.54	266.42
3.33	228.05	267.57		3.33	246.95	267.57		3.33	208.77	267.57		3.33	245.97	267.57
3.35	214.55	268.73		3.35	180.44	268.73		3.35	217.48	268.73		3.35	220.5	268.73
3.37	189.01	269.88		3.37	194.66	269.88		3.37	216.84	269.88		3.37	173.55	269.88
3.38	239.34	271.03		3.38	174.11	271.03		3.38	255.38	271.03		3.38	163.6	271.03
3.4	187.42	272.19		3.4	195.95	272.19		3.4	208.15	272.19		3.4	213.55	272.19
3.42	198.83	273.34		3.42	240.04	273.34		3.42	182.94	273.34		3.42	204.38	273.34
3.43	207.41	274.49		3.43	252.69	274.49		3.43	181.55	274.49		3.43	148.55	274.49
3.45	175	275.64		3.45	200.99	275.64		3.45	242.65	275.64		3.45	178.65	275.64
3.47	194.23	276.8		3.47	208.16	276.8		3.47	188.66	276.8		3.47	221.28	276.8
3.48	219.05	277.95		3.48	185.89	277.95		3.48	240.72	277.95		3.48	189.99	277.95
3.5	202.91	279.1		3.5	230.91	279.1		3.5	215.92	279.1		3.5	221.44	279.1
3.52	224.21	280.25		3.52	230.63	280.25		3.52	210.75	280.25		3.52	252.16	280.25
3.53	208.29	281.4		3.53	213.69	281.4		3.53	224.54	281.4		3.53	173.91	281.4
3.55	272.56	282.55		3.55	264.5	282.55		3.55	203.53	282.55		3.55	207.84	282.55
3.57	171.57	283.7		3.57	196.97	283.7		3.57	182.87	283.7		3.57	171.78	283.7
3.58	260.81	284.85		3.58	216.46	284.85		3.58	287.76	284.85		3.58	241.01	284.85
3.6	266.7	286		3.6	190.79	286		3.6	201.62	286		3.6	205.39	286
3.62	271.2	287.14		3.62	231.32	287.14		3.62	213.18	287.14		3.62	231.39	287.14
3.63	258.77	288.29		3.63	224.13	288.29		3.63	196.09	288.29		3.63	252.37	288.29
3.65	253.45	289.44		3.65	232.76	289.44		3.65	204.11	289.44		3.65	182.59	289.44
3.67	249.41	290.59		3.67	218.98	290.59		3.67	255.23	290.59		3.67	196.61	290.59
3.68	262.49	291.73		3.68	220.41	291.73		3.68	259.16	291.73		3.68	191.74	291.73
3.7	196.77	292.88		3.7	223.59	292.88		3.7	160.43	292.88		3.7	228.17	292.88
3.72	226.44	294.03		3.72	268.55	294.03		3.72	196.75	294.03		3.72	223.96	294.03
3.73	200.62	295.17		3.73	186.98	295.17		3.73	224.11	295.17		3.73	225.67	295.17
3.75	250.47	296.32		3.75	221.15	296.32		3.75	234.7	296.32		3.75	191.21	296.32
3.77	229.58	297.46		3.77	202.49	297.46		3.77	165.61	297.46		3.77	212.41	297.46
3.78	225.95	298.61		3.78	275.6	298.61		3.78	230.85	298.61		3.78	282.34	298.61
3.8	211.81	299.75		3.8	182.13	299.75		3.8	203.23	299.75		3.8	231.31	299.75
3.82	180.82	300.9		3.82	262.14	300.9		3.82	191.53	300.9		3.82	238.27	300.9
3.83	301.19	302.04		3.83	237.04	302.04		3.83	273.9	302.04		3.83	207.72	302.04
3.85	211.37	303.19		3.85	250.33	303.19		3.85	270.31	303.19		3.85	201.02	303.19
3.87	284.8	304.33		3.87	268.58	304.33		3.87	225.6	304.33		3.87	184.42	304.33
3.88	236.03	305.47		3.88	308.91	305.47		3.88	239.44	305.47		3.88	246.42	305.47
3.9	237.94	306.61		3.9	230.02	306.61		3.9	193.65	306.61		3.9	215.74	306.61
3.92	236.15	307.76		3.92	250.54	307.76		3.92	242.84	307.76		3.92	259.74	307.76
3.93	298.61	308.9		3.93	250.49	308.9		3.93	231.89	308.9		3.93	278.36	308.9
3.95	347.13	310.04		3.95	261.17	310.04		3.95	262.71	310.04		3.95	228.27	310.04
3.97	276.65	311.18		3.97	256.76	311.18		3.97	229.75	311.18		3.97	234.77	311.18
3.98	274.29	312.32		3.98	264.02	312.32		3.98	253.09	312.32		3.98	215	312.32
4	290.57	313.47		4	245.5	313.47		4	215.61	313.47		4	220.28	313.47
4.02	255.74	314.61		4.02	237.6	314.61		4.02	283.63	314.61		4.02	238.28	314.61
4.03	254.46	315.75		4.03	238.91	315.75		4.03	259.74	315.75		4.03	192.81	315.75
4.05	259.27	316.89		4.05	228.42	316.89		4.05	266.12	316.89		4.05	216.53	316.89
4.07	228.7	318.03		4.07	217.92	318.03		4.07	263.28	318.03		4.07	241.75	318.03
4.08	233.04	319.17		4.08	249.61	319.17		4.08	200.86	319.17		4.08	212.14	319.17
4.1	243.31	320.31		4.1	252.99	320.31		4.1	285.92	320.31		4.1	315.47	320.31
4.12	234.33	321.45		4.12	269.7	321.45		4.12	241.13	321.45		4.12	223.54	321.45
4.13	226.15	322.58		4.13	222.97	322.58		4.13	262.23	322.58		4.13	219.82	322.58
4.15	261.79	323.72		4.15	277.21	323.72		4.15	255.45	323.72		4.15	256.24	323.72
4.17	237.61	324.86		4.17	194.25	324.86		4.17	307.65	324.86		4.17	282.24	324.86
4.18	278.79	326		4.18	244.62	326		4.18	249.59	326		4.18	297.53	326
4.2	237.33	327.14		4.2	221.25	327.14		4.2	230.01	327.14		4.2	287.09	327.14
4.22	200.11	328.27		4.22	207.04	328.27		4.22	277.33	328.27		4.22	262.75	328.27
4.23	229.4	329.41		4.23	263.24	329.41		4.23	279.82	329.41		4.23	240.27	329.41
4.25	243.29	330.55		4.25	281.18	330.55		4.25	328.37	330.55		4.25	335.53	330.55
4.27	240.17	331.68		4.27	231.52	331.68		4.27	209.77	331.68		4.27	304.78	331.68
4.28	266.36	332.82		4.28	227.31	332.82		4.28	204.03	332.82		4.28	250.53	332.82
4.3	283.07	333.96		4.3	250.84	333.96		4.3	270.13	333.96		4.3	308.52	333.96
4.32	206.33	335.09		4.32	293.65	335.09		4.32	228.34	335.09		4.32	264.09	335.09
4.33	228.87	336.23		4.33	242.78	336.23		4.33	239.5	336.23		4.33	222.44	336.23
4.35	289.86	337.36		4.35	255.93	337.36		4.35	227.36	337.36		4.35	282.85	337.36
4.37	225.41	338.5		4.37	268.47	338.5		4.37	302.96	338.5		4.37	259.79	338.5
4.38	241.48	339.63		4.38	275.48	339.63		4.38	200.22	339.63		4.38	248.79	339.63
4.4	244.27	340.77		4.4	286.4	340.77		4.4	247.19	340.77		4.4	231.23	340.77
4.42	240.87	341.9		4.42	267.27	341.9		4.42	284.82	341.9		4.42	232.86	341.9
4.43	261.2	343.04		4.43	245.98	343.04		4.43	278.47	343.04		4.43	290.57	343.04
4.45	272.37	344.17		4.45	306.76	344.17		4.45	221.06	344.17		4.45	224.18	344.17
4.47	299.53	345.3		4.47	287.2	345.3		4.47	259.9	345.3		4.47	261.06	345.3
4.48	283.86	346.44		4.48	258.18	346.44		4.48	255.35	346.44		4.48	258.48	346.44
4.5	251.65	347.57		4.5	262.28	347.57		4.5	254.3	347.57		4.5	317.42	347.57
4.52	240.27	348.7		4.52	301.04	348.7		4.52	259.73	348.7		4.52	211.51	348.7
4.53	263.2	349.83		4.53	322.45	349.83		4.53	252.84	349.83		4.53	269.83	349.83
4.55	230.1	350.97		4.55	249.86	350.97		4.55	287.94	350.97		4.55	239.13	350.97
4.57	255.38	352.1		4.57	275.46	352.1		4.57	321.76	352.1		4.57	223.26	352.1
4.58	296.65	353.23		4.58	232.54	353.23		4.58	327.24	353.23		4.58	298.74	353.23
4.6	234.42	354.36		4.6	281.81	354.36		4.6	291.9	354.36		4.6	210.63	354.36
4.62	301.84	355.49		4.62	305.63	355.49		4.62	248.49	355.49		4.62	327.18	355.49
4.63	235.48	356.62		4.63	347.9	356.62		4.63	267.93	356.62		4.63	331.83	356.62
4.65	245.96	357.75		4.65	321.17	357.75		4.65	339.9	357.75		4.65	296.56	357.75
4.67	211.04	358.89		4.67	315.52	358.89		4.67	290.95	358.89		4.67	310.31	358.89
4.68	273.11	360.02		4.68	302.42	360.02		4.68	281.41	360.02		4.68	491.31	360.02
4.7	368.94	361.15		4.7	264.97	361.15		4.7	220.91	361.15		4.7	406.01	361.15
4.72	295.55	362.28		4.72	347.48	362.28		4.72	339.13	362.28		4.72	284.2	362.28
4.73	295.28	363.41		4.73	375.66	363.41		4.73	362.95	363.41		4.73	286.54	363.41
4.75	271.87	364.53		4.75	290.08	364.53		4.75	259.95	364.53		4.75	259.85	364.53
4.77	229.85	365.66		4.77	321.93	365.66		4.77	277.81	365.66		4.77	190.91	365.66
4.78	344.11	366.79		4.78	305.26	366.79		4.78	241.73	366.79		4.78	265.31	366.79
4.8	281.56	367.92		4.8	295.64	367.92		4.8	229.18	367.92		4.8	320.95	367.92
4.82	308	369.05		4.82	285.52	369.05		4.82	378.83	369.05		4.82	289.07	369.05
4.83	311.61	370.18		4.83	275.01	370.18		4.83	268.29	370.18		4.83	245.83	370.18
4.85	330.68	371.31		4.85	313.25	371.31		4.85	264.02	371.31		4.85	223.92	371.31
4.87	248.39	372.43		4.87	364.68	372.43		4.87	253.62	372.43		4.87	318.27	372.43
4.88	281.1	373.56		4.88	319.57	373.56		4.88	275.07	373.56		4.88	343.5	373.56
4.9	298.69	374.69		4.9	285.35	374.69		4.9	281.99	374.69		4.9	293.31	374.69
4.92	337.27	375.82		4.92	356.3	375.82		4.92	288.81	375.82		4.92	352.4	375.82
4.93	322.62	376.94		4.93	244.38	376.94		4.93	300.64	376.94		4.93	305.01	376.94
4.95	281.43	378.07		4.95	251.6	378.07		4.95	299.37	378.07		4.95	297.52	378.07
4.97	229.47	379.2		4.97	312.57	379.2		4.97	287.7	379.2		4.97	318.46	379.2
4.98	285.8	380.32		4.98	300.4	380.32		4.98	315.89	380.32		4.98	271.8	380.32
5	275.7	381.45		5	322.01	381.45		5	237.88	381.45		5	352.06	381.45
5.02	303.94	382.58		5.02	327.93	382.58		5.02	386.22	382.58		5.02	333.24	382.58
5.03	264.8	383.7		5.03	309.41	383.7		5.03	259.52	383.7		5.03	361.23	383.7
5.05	307.88	384.83		5.05	298.85	384.83		5.05	349.97	384.83		5.05	226.74	384.83
5.07	257.98	385.95		5.07	270.54	385.95		5.07	270.42	385.95		5.07	343.47	385.95
5.08	294.72	387.08		5.08	306.5	387.08		5.08	292.44	387.08		5.08	342.72	387.08
5.1	280.91	388.2		5.1	277.14	388.2		5.1	327.21	388.2		5.1	306.2	388.2
5.12	345.58	389.33		5.12	297.49	389.33		5.12	399.19	389.33		5.12	279.31	389.33
5.13	312.82	390.45		5.13	308.51	390.45		5.13	386.83	390.45		5.13	253.21	390.45
5.15	294.62	391.58		5.15	326.39	391.58		5.15	291.12	391.58		5.15	289.91	391.58
5.17	359.59	392.7		5.17	306.67	392.7		5.17	304.49	392.7		5.17	248.82	392.7
5.18	278.73	393.82		5.18	347.85	393.82		5.18	285.17	393.82		5.18	283.53	393.82
5.2	271.39	394.95		5.2	351.39	394.95		5.2	321.94	394.95		5.2	327.52	394.95
5.22	289.1	396.07		5.22	291.42	396.07		5.22	344.86	396.07		5.22	266.66	396.07
5.23	327.14	397.19		5.23	291.01	397.19		5.23	309.66	397.19		5.23	265.41	397.19
5.25	278.12	398.32		5.25	305.21	398.32		5.25	296.89	398.32		5.25	324.96	398.32
5.27	362.65	399.44		5.27	366.36	399.44		5.27	288.77	399.44		5.27	316.68	399.44
5.28	294.86	400.56		5.28	396.36	400.56		5.28	245.46	400.56		5.28	310.85	400.56
5.3	282.77	401.69		5.3	389	401.69		5.3	299.04	401.69		5.3	270.84	401.69
5.32	313.17	402.81		5.32	392.01	402.81		5.32	320.04	402.81		5.32	318.92	402.81
5.33	290.8	403.93		5.33	332.52	403.93		5.33	307.92	403.93		5.33	315.95	403.93
5.35	302.78	405.05		5.35	324.11	405.05		5.35	279.66	405.05		5.35	425.01	405.05
5.37	322.83	406.17		5.37	348.79	406.17		5.37	385.37	406.17		5.37	362.49	406.17
5.38	283.87	407.3		5.38	299.05	407.3		5.38	386.91	407.3		5.38	361.93	407.3
5.4	276.55	408.42		5.4	345.97	408.42		5.4	422.72	408.42		5.4	283.13	408.42
5.42	232.54	409.54		5.42	265.52	409.54		5.42	410.22	409.54		5.42	280.8	409.54
5.43	249.37	410.66		5.43	358.51	410.66		5.43	360.8	410.66		5.43	285.01	410.66
5.45	298.1	411.78		5.45	302.38	411.78		5.45	284.74	411.78		5.45	358.27	411.78
5.47	296.36	412.9		5.47	360.75	412.9		5.47	305.51	412.9		5.47	355	412.9
5.48	406.73	414.02		5.48	325.46	414.02		5.48	328.22	414.02		5.48	317.56	414.02
5.5	387.49	415.14		5.5	356.61	415.14		5.5	458.53	415.14		5.5	250.71	415.14
5.52	280.7	416.26		5.52	310.48	416.26		5.52	313.24	416.26		5.52	278.89	416.26
5.53	399.18	417.38		5.53	342.5	417.38		5.53	344.3	417.38		5.53	337.94	417.38
5.55	321.1	418.5		5.55	311.3	418.5		5.55	336.1	418.5		5.55	390.78	418.5
5.57	293.34	419.62		5.57	323.97	419.62		5.57	321.67	419.62		5.57	358.59	419.62
5.58	366.91	420.74		5.58	346.71	420.74		5.58	363.75	420.74		5.58	302.17	420.74
5.6	314.57	421.86		5.6	272.47	421.86		5.6	320.2	421.86		5.6	321.96	421.86
5.62	343.69	422.98		5.62	330.19	422.98		5.62	340.6	422.98		5.62	387.53	422.98
5.63	316.98	424.1		5.63	328.87	424.1		5.63	309.64	424.1		5.63	365.48	424.1
5.65	380.72	425.22		5.65	316.04	425.22		5.65	303.12	425.22		5.65	302.84	425.22
5.67	389.94	426.33		5.67	359.53	426.33		5.67	375.83	426.33		5.67	354.3	426.33
5.68	309.25	427.45		5.68	327.93	427.45		5.68	348.96	427.45		5.68	382.72	427.45
5.7	308.89	428.57		5.7	336.83	428.57		5.7	315.83	428.57		5.7	276.21	428.57
5.72	333.35	429.69		5.72	354.22	429.69		5.72	396.85	429.69		5.72	345.9	429.69
5.73	301.03	430.81		5.73	316.78	430.81		5.73	292.84	430.81		5.73	344.38	430.81
5.75	361.23	431.92		5.75	358.66	431.92		5.75	338.83	431.92		5.75	344.08	431.92
5.77	329.2	433.04		5.77	353.42	433.04		5.77	341.32	433.04		5.77	289.98	433.04
5.78	318.2	434.16		5.78	408.39	434.16		5.78	402.06	434.16		5.78	310.22	434.16
5.8	317.4	435.28		5.8	340.53	435.28		5.8	287.11	435.28		5.8	332.12	435.28
5.82	356.26	436.39		5.82	371.44	436.39		5.82	400.44	436.39		5.82	388.88	436.39
5.83	317.15	437.51		5.83	437.53	437.51		5.83	332.73	437.51		5.83	350.82	437.51
5.85	325.64	438.63		5.85	390.03	438.63		5.85	344.03	438.63		5.85	478.97	438.63
5.87	320.85	439.74		5.87	340	439.74		5.87	294.57	439.74		5.87	430.76	439.74
5.88	379.37	440.86		5.88	331.69	440.86		5.88	306.01	440.86		5.88	347.95	440.86
5.9	307.77	441.98		5.9	424.77	441.98		5.9	337.87	441.98		5.9	370.17	441.98
5.92	386.3	443.09		5.92	387.9	443.09		5.92	331.45	443.09		5.92	316.96	443.09
5.93	482.86	444.21		5.93	418.25	444.21		5.93	334.84	444.21		5.93	327.83	444.21
5.95	326.71	445.32		5.95	358.27	445.32		5.95	359.37	445.32		5.95	322.16	445.32
5.97	322.37	446.44		5.97	393.6	446.44		5.97	395.46	446.44		5.97	358.25	446.44
5.98	379.72	447.55		5.98	399.53	447.55		5.98	333.3	447.55		5.98	374.97	447.55
6	359.85	448.67		6	377.76	448.67		6	311.65	448.67		6	362.51	448.67
6.02	336.58	449.78		6.02	375.24	449.78		6.02	367.48	449.78		6.02	389.75	449.78
6.03	372.22	450.9		6.03	332.88	450.9		6.03	351.77	450.9		6.03	359.72	450.9
6.05	379	452.01		6.05	407.58	452.01		6.05	358.66	452.01		6.05	308.4	452.01
6.07	330.82	453.13		6.07	336.39	453.13		6.07	360.53	453.13		6.07	324.85	453.13
6.08	375.69	454.24		6.08	414.54	454.24		6.08	354.73	454.24		6.08	292.32	454.24
6.1	335.48	455.36		6.1	327.33	455.36		6.1	311	455.36		6.1	379.35	455.36
6.12	387.83	456.47		6.12	353.87	456.47		6.12	328.67	456.47		6.12	308.97	456.47
6.13	361.84	457.58		6.13	359.42	457.58		6.13	363.13	457.58		6.13	314.92	457.58
6.15	423.98	458.7		6.15	348.31	458.7		6.15	349.54	458.7		6.15	461.82	458.7
6.17	348.16	459.81		6.17	359.82	459.81		6.17	355.78	459.81		6.17	337.6	459.81
6.18	395.52	460.93		6.18	321.04	460.93		6.18	291.56	460.93		6.18	338.96	460.93
6.2	358.82	462.04		6.2	381.66	462.04		6.2	415.47	462.04		6.2	363.08	462.04
6.22	379.92	463.15		6.22	348.58	463.15		6.22	346.23	463.15		6.22	379.62	463.15
6.23	314.05	464.26		6.23	373.78	464.26		6.23	333.57	464.26		6.23	316.47	464.26
6.25	346.1	465.38		6.25	353.12	465.38		6.25	373	465.38		6.25	384.67	465.38
6.27	376.62	466.49		6.27	344.85	466.49		6.27	341.53	466.49		6.27	426.85	466.49
6.28	363.75	467.6		6.28	403.53	467.6		6.28	376.92	467.6		6.28	354.73	467.6
6.3	402.16	468.71		6.3	425.38	468.71		6.3	302.16	468.71		6.3	401.77	468.71
6.32	346.59	469.83		6.32	397.55	469.83		6.32	411.81	469.83		6.32	362.06	469.83
6.33	370.81	470.94		6.33	373.81	470.94		6.33	355.82	470.94		6.33	377.28	470.94
6.35	357.75	472.05		6.35	389.29	472.05		6.35	375.38	472.05		6.35	375.32	472.05
6.37	307.03	473.16		6.37	401.89	473.16		6.37	431.64	473.16		6.37	404.52	473.16
6.38	400.26	474.27		6.38	376.35	474.27		6.38	365.46	474.27		6.38	411.19	474.27
6.4	386.74	475.39		6.4	381.27	475.39		6.4	308.16	475.39		6.4	339.86	475.39
6.42	426.72	476.5		6.42	379.75	476.5		6.42	361.03	476.5		6.42	469.19	476.5
6.43	397.99	477.61		6.43	371.03	477.61		6.43	406.9	477.61		6.43	452.27	477.61
6.45	380.36	478.72		6.45	414.31	478.72		6.45	373.71	478.72		6.45	478.16	478.72
6.47	378.28	479.83		6.47	408.06	479.83		6.47	381.87	479.83		6.47	368.94	479.83
6.48	371.84	480.94		6.48	439.79	480.94		6.48	414.73	480.94		6.48	354.2	480.94
6.5	380.37	482.05		6.5	390.02	482.05		6.5	325.38	482.05		6.5	430.14	482.05
6.52	418.56	483.16		6.52	396.09	483.16		6.52	432.62	483.16		6.52	470.3	483.16
6.53	351.89	484.27		6.53	455.51	484.27		6.53	423.36	484.27		6.53	458.62	484.27
6.55	399.19	485.38		6.55	379.1	485.38		6.55	416.51	485.38		6.55	387.52	485.38
6.57	397.8	486.49		6.57	421.6	486.49		6.57	340.52	486.49		6.57	426.69	486.49
6.58	377.7	487.6		6.58	455.68	487.6		6.58	371.99	487.6		6.58	310.8	487.6
6.6	409.31	488.71		6.6	420.91	488.71		6.6	410.31	488.71		6.6	373.7	488.71
6.62	394.69	489.82		6.62	438.49	489.82		6.62	394.45	489.82		6.62	405.74	489.82
6.63	470.68	490.93		6.63	459.9	490.93		6.63	417.6	490.93		6.63	326.74	490.93
6.65	401.13	492.04		6.65	374.69	492.04		6.65	388.27	492.04		6.65	362.61	492.04
6.67	389.78	493.15		6.67	458.76	493.15		6.67	400.31	493.15		6.67	517.69	493.15
6.68	348.57	494.26		6.68	435.21	494.26		6.68	406.59	494.26		6.68	351.02	494.26
6.7	476.53	495.37		6.7	371.8	495.37		6.7	363.41	495.37		6.7	389.67	495.37
6.72	417.75	496.48		6.72	427.26	496.48		6.72	387.31	496.48		6.72	409.29	496.48
6.73	399.38	497.59		6.73	415.92	497.59		6.73	393.75	497.59		6.73	422.83	497.59
6.75	406.89	498.7		6.75	362.2	498.7		6.75	405.83	498.7		6.75	448.21	498.7
6.77	445.93	499.8		6.77	372.56	499.8		6.77	449.54	499.8		6.77	394.16	499.8
6.78	404.93	500.91		6.78	414.87	500.91		6.78	438.25	500.91		6.78	385.77	500.91
6.8	380.94	502.02		6.8	459.88	502.02		6.8	407.15	502.02		6.8	466.96	502.02
6.82	400.08	503.13		6.82	437.62	503.13		6.82	406.25	503.13		6.82	386	503.13
6.83	375.9	504.24		6.83	474.9	504.24		6.83	377.31	504.24		6.83	377.6	504.24
6.85	401.43	505.34		6.85	396.84	505.34		6.85	417.19	505.34		6.85	401.01	505.34
6.87	418.06	506.45		6.87	520.53	506.45		6.87	383.26	506.45		6.87	334.89	506.45
6.88	363.9	507.56		6.88	419.7	507.56		6.88	412.77	507.56		6.88	426.51	507.56
6.9	359.92	508.67		6.9	394.69	508.67		6.9	448.47	508.67		6.9	343.44	508.67
6.92	446.42	509.77		6.92	390.93	509.77		6.92	405.26	509.77		6.92	423.46	509.77
6.93	436.66	510.88		6.93	399.25	510.88		6.93	380.9	510.88		6.93	461.99	510.88
6.95	404.97	511.99		6.95	419.96	511.99		6.95	442.57	511.99		6.95	489.32	511.99
6.97	454.02	513.09		6.97	409.79	513.09		6.97	448.91	513.09		6.97	357.62	513.09
6.98	352.32	514.2		6.98	478.02	514.2		6.98	480.73	514.2		6.98	516.97	514.2
7	359.96	515.31		7	448.8	515.31		7	428.44	515.31		7	434.82	515.31
7.02	374.47	516.41		7.02	445.36	516.41		7.02	436.84	516.41		7.02	504.58	516.41
7.03	402.42	517.52		7.03	422.41	517.52		7.03	445.74	517.52		7.03	671.81	517.52
7.05	523.39	518.63		7.05	387.12	518.63		7.05	368.12	518.63		7.05	498.48	518.63
7.07	404.84	519.73		7.07	391.78	519.73		7.07	415.17	519.73		7.07	415.81	519.73
7.08	426.34	520.84		7.08	449.71	520.84		7.08	570.94	520.84		7.08	460.49	520.84
7.1	477.68	521.95		7.1	496.79	521.95		7.1	517.7	521.95		7.1	457.84	521.95
7.12	439.98	523.05		7.12	434.02	523.05		7.12	458.12	523.05		7.12	427.08	523.05
7.13	384.61	524.16		7.13	398.37	524.16		7.13	393.88	524.16		7.13	394.65	524.16
7.15	453.29	525.26		7.15	488.78	525.26		7.15	454.66	525.26		7.15	368.32	525.26
7.17	490.45	526.37		7.17	402.36	526.37		7.17	514.06	526.37		7.17	430.99	526.37
7.18	411.4	527.47		7.18	422.06	527.47		7.18	459.2	527.47		7.18	442.64	527.47
7.2	459.37	528.58		7.2	441.3	528.58		7.2	375.9	528.58		7.2	407.02	528.58
7.22	460.5	529.68		7.22	408.59	529.68		7.22	397.31	529.68		7.22	418.26	529.68
7.23	488.22	530.79		7.23	458.71	530.79		7.23	472.57	530.79		7.23	470.5	530.79
7.25	502.06	531.89		7.25	426.5	531.89		7.25	434.24	531.89		7.25	408.54	531.89
7.27	485.07	533		7.27	418.36	533		7.27	380.69	533		7.27	421.61	533
7.28	498.37	534.1		7.28	427.34	534.1		7.28	381.87	534.1		7.28	538.9	534.1
7.3	452.39	535.21		7.3	455.18	535.21		7.3	458.79	535.21		7.3	428.37	535.21
7.32	438.27	536.31		7.32	467.58	536.31		7.32	411.57	536.31		7.32	430.19	536.31
7.33	449.11	537.41		7.33	441.43	537.41		7.33	432.4	537.41		7.33	488.92	537.41
7.35	424.22	538.52		7.35	456.97	538.52		7.35	393.44	538.52		7.35	477.34	538.52
7.37	490.91	539.62		7.37	459.24	539.62		7.37	449.89	539.62		7.37	390.97	539.62
7.38	427.12	540.73		7.38	485.5	540.73		7.38	436.28	540.73		7.38	432.75	540.73
7.4	401.98	541.83		7.4	445.01	541.83		7.4	379.75	541.83		7.4	387.85	541.83
7.42	464.44	542.93		7.42	444.81	542.93		7.42	439.68	542.93		7.42	387.77	542.93
7.43	447.61	544.04		7.43	492.47	544.04		7.43	432.17	544.04		7.43	469.27	544.04
7.45	421.64	545.14		7.45	418.32	545.14		7.45	404.63	545.14		7.45	409.43	545.14
7.47	429.32	546.24		7.47	429.84	546.24		7.47	427.24	546.24		7.47	429.16	546.24
7.48	454.08	547.35		7.48	500.6	547.35		7.48	527.29	547.35		7.48	363.35	547.35
7.5	482.64	548.45		7.5	447.55	548.45		7.5	402.68	548.45		7.5	382.34	548.45
7.52	506.17	549.55		7.52	459.22	549.55		7.52	434.42	549.55		7.52	413.84	549.55
7.53	486.72	550.66		7.53	455.21	550.66		7.53	377.24	550.66		7.53	519.48	550.66
7.55	502.91	551.76		7.55	504.98	551.76		7.55	424.52	551.76		7.55	550.3	551.76
7.57	458.56	552.86		7.57	508.5	552.86		7.57	421.75	552.86		7.57	509.53	552.86
7.58	416.3	553.96		7.58	369.3	553.96		7.58	476.96	553.96		7.58	405.54	553.96
7.6	430.69	555.07		7.6	421.72	555.07		7.6	406.02	555.07		7.6	470.6	555.07
7.62	455.32	556.17		7.62	561.93	556.17		7.62	501.45	556.17		7.62	513.57	556.17
7.63	391.79	557.27		7.63	521.26	557.27		7.63	437.42	557.27		7.63	462.29	557.27
7.65	454.75	558.37		7.65	479.13	558.37		7.65	382.46	558.37		7.65	450.26	558.37
7.67	511.94	559.47		7.67	473.6	559.47		7.67	514.23	559.47		7.67	400.57	559.47
7.68	552.89	560.58		7.68	418.33	560.58		7.68	501.37	560.58		7.68	434.55	560.58
7.7	404.94	561.68		7.7	474.75	561.68		7.7	536.34	561.68		7.7	410.89	561.68
7.72	460.97	562.78		7.72	475.08	562.78		7.72	500.87	562.78		7.72	473.76	562.78
7.73	515.54	563.88		7.73	524.31	563.88		7.73	480.13	563.88		7.73	434.33	563.88
7.75	471.41	564.98		7.75	421.76	564.98		7.75	523.58	564.98		7.75	403.55	564.98
7.77	501.65	566.08		7.77	558.91	566.08		7.77	496.1	566.08		7.77	480.61	566.08
7.78	473.18	567.18		7.78	535.33	567.18		7.78	532.8	567.18		7.78	464.81	567.18
7.8	393.81	568.28		7.8	502.69	568.28		7.8	435.94	568.28		7.8	465.35	568.28
7.82	465.19	569.39		7.82	473.91	569.39		7.82	420	569.39		7.82	477.28	569.39
7.83	425.78	570.49		7.83	509.43	570.49		7.83	461.15	570.49		7.83	515.81	570.49
7.85	439.27	571.59		7.85	474.52	571.59		7.85	608.01	571.59		7.85	486.26	571.59
7.87	567.34	572.69		7.87	482.65	572.69		7.87	490.3	572.69		7.87	472.07	572.69
7.88	537.77	573.79		7.88	422.66	573.79		7.88	505.2	573.79		7.88	512.93	573.79
7.9	602.47	574.89		7.9	509.52	574.89		7.9	493.25	574.89		7.9	481.82	574.89
7.92	604.29	575.99		7.92	565.44	575.99		7.92	439.39	575.99		7.92	386.99	575.99
7.93	473.2	577.09		7.93	539.58	577.09		7.93	459.99	577.09		7.93	463.66	577.09
7.95	450.73	578.19		7.95	543.08	578.19		7.95	396.96	578.19		7.95	491.27	578.19
7.97	460.03	579.29		7.97	554.82	579.29		7.97	465.19	579.29		7.97	507.01	579.29
7.98	479.57	580.39		7.98	548.07	580.39		7.98	515.71	580.39		7.98	478.73	580.39
8	487.58	581.49		8	439.56	581.49		8	420.79	581.49		8	444.53	581.49
8.02	506.23	582.59		8.02	469.23	582.59		8.02	490.47	582.59		8.02	540.68	582.59
8.03	495.59	583.69		8.03	483.09	583.69		8.03	544.64	583.69		8.03	568.35	583.69
8.05	454.29	584.79		8.05	552.54	584.79		8.05	505.53	584.79		8.05	418.38	584.79
8.07	498.82	585.89		8.07	485.18	585.89		8.07	487.87	585.89		8.07	391.78	585.89
8.08	500.67	586.99		8.08	496.62	586.99		8.08	493.26	586.99		8.08	465.43	586.99
8.1	478.27	588.08		8.1	543.17	588.08		8.1	505.42	588.08		8.1	481.68	588.08
8.12	406.4	589.18		8.12	516.54	589.18		8.12	468.42	589.18		8.12	417.59	589.18
8.13	431.74	590.28		8.13	506.62	590.28		8.13	567.52	590.28		8.13	555.44	590.28
8.15	441.07	591.38		8.15	551.68	591.38		8.15	452.05	591.38		8.15	509.35	591.38
8.17	483.1	592.48		8.17	501.16	592.48		8.17	421.57	592.48		8.17	520.82	592.48
8.18	531.22	593.58		8.18	558.9	593.58		8.18	438.58	593.58		8.18	506.55	593.58
8.2	495	594.68		8.2	587.96	594.68		8.2	503.44	594.68		8.2	522.91	594.68
8.22	431.49	595.78		8.22	467.38	595.78		8.22	475.31	595.78		8.22	505.53	595.78
8.23	455.06	596.87		8.23	491.54	596.87		8.23	564.69	596.87		8.23	511.54	596.87
8.25	512.76	597.97		8.25	526.57	597.97		8.25	573.16	597.97		8.25	418.67	597.97
8.27	488.69	599.07		8.27	502.05	599.07		8.27	553.78	599.07		8.27	446.71	599.07
8.28	557.41	600.17		8.28	528.67	600.17		8.28	536.14	600.17		8.28	494.25	600.17
8.3	534.49	601.27		8.3	596.46	601.27		8.3	527.53	601.27		8.3	459.25	601.27
8.32	530.49	602.36		8.32	584.16	602.36		8.32	530.82	602.36		8.32	558.56	602.36
8.33	525.4	603.46		8.33	482.97	603.46		8.33	560.55	603.46		8.33	612.18	603.46
8.35	480.28	604.56		8.35	523.42	604.56		8.35	519.02	604.56		8.35	537.78	604.56
8.37	516.13	605.66		8.37	494.58	605.66		8.37	539.03	605.66		8.37	561.67	605.66
8.38	482.05	606.75		8.38	522.42	606.75		8.38	484.69	606.75		8.38	420.77	606.75
8.4	469.67	607.85		8.4	429.13	607.85		8.4	432.45	607.85		8.4	517.07	607.85
8.42	456.01	608.95		8.42	507.31	608.95		8.42	542.78	608.95		8.42	464.28	608.95
8.43	411.34	610.05		8.43	405.64	610.05		8.43	582.03	610.05		8.43	519.82	610.05
8.45	450.22	611.14		8.45	541.14	611.14		8.45	489.4	611.14		8.45	495.74	611.14
8.47	504.18	612.24		8.47	481.19	612.24		8.47	552.89	612.24		8.47	487.07	612.24
8.48	441.04	613.34		8.48	578.31	613.34		8.48	515.09	613.34		8.48	382.3	613.34
8.5	529.04	614.43		8.5	530.41	614.43		8.5	570.48	614.43		8.5	630.43	614.43
8.52	455.26	615.53		8.52	565.73	615.53		8.52	550.27	615.53		8.52	549.4	615.53
8.53	472.76	616.63		8.53	451.69	616.63		8.53	470.87	616.63		8.53	614.95	616.63
8.55	503.26	617.72		8.55	441.64	617.72		8.55	457.54	617.72		8.55	522.21	617.72
8.57	500.84	618.82		8.57	500.53	618.82		8.57	459.81	618.82		8.57	516.88	618.82
8.58	492.62	619.92		8.58	543.94	619.92		8.58	554.21	619.92		8.58	480.97	619.92
8.6	525.18	621.01		8.6	493.62	621.01		8.6	549.33	621.01		8.6	607.73	621.01
8.62	551.56	622.11		8.62	521.4	622.11		8.62	472.24	622.11		8.62	598.76	622.11
8.63	450.76	623.2		8.63	551.19	623.2		8.63	507.13	623.2		8.63	518.81	623.2
8.65	467.82	624.3		8.65	491.78	624.3		8.65	440.57	624.3		8.65	508.8	624.3
8.67	423.1	625.4		8.67	478.42	625.4		8.67	456.12	625.4		8.67	461.77	625.4
8.68	491.4	626.49		8.68	538.42	626.49		8.68	515.93	626.49		8.68	554.43	626.49
8.7	514.69	627.59		8.7	572.43	627.59		8.7	453.45	627.59		8.7	528.94	627.59
8.72	486.8	628.68		8.72	636.96	628.68		8.72	531.53	628.68		8.72	533.33	628.68
8.73	493.48	629.78		8.73	581.46	629.78		8.73	540.55	629.78		8.73	524.18	629.78
8.75	534.82	630.87		8.75	633	630.87		8.75	508.71	630.87		8.75	495.87	630.87
8.77	493.67	631.97		8.77	493.03	631.97		8.77	436.4	631.97		8.77	491.54	631.97
8.78	569.82	633.06		8.78	524.03	633.06		8.78	538.24	633.06		8.78	719.7	633.06
8.8	462.91	634.16		8.8	562.45	634.16		8.8	476.72	634.16		8.8	567.02	634.16
8.82	518.54	635.25		8.82	542.23	635.25		8.82	508.56	635.25		8.82	606.45	635.25
8.83	476.87	636.35		8.83	564.33	636.35		8.83	572.29	636.35		8.83	477.6	636.35
8.85	528.12	637.44		8.85	600.32	637.44		8.85	541.96	637.44		8.85	530.69	637.44
8.87	481	638.54		8.87	516.87	638.54		8.87	541.98	638.54		8.87	530.82	638.54
8.88	481.04	639.63		8.88	563.36	639.63		8.88	564.48	639.63		8.88	551.77	639.63
8.9	547.29	640.73		8.9	595.91	640.73		8.9	473.91	640.73		8.9	461.52	640.73
8.92	510.35	641.82		8.92	539.22	641.82		8.92	445.99	641.82		8.92	442.7	641.82
8.93	586.75	642.92		8.93	554.95	642.92		8.93	519.89	642.92		8.93	495.72	642.92
8.95	522.63	644.01		8.95	500.9	644.01		8.95	590.08	644.01		8.95	497.46	644.01
8.97	596.83	645.1		8.97	482.22	645.1		8.97	643.73	645.1		8.97	473.17	645.1
8.98	473.8	646.2		8.98	587.34	646.2		8.98	582.85	646.2		8.98	584.4	646.2
9	492.25	647.29		9	557.45	647.29		9	517.91	647.29		9	610.38	647.29
9.02	566.39	648.39		9.02	572.89	648.39		9.02	539.98	648.39		9.02	506.43	648.39
9.03	499.47	649.48		9.03	581.66	649.48		9.03	541.02	649.48		9.03	512.44	649.48
9.05	533.42	650.57		9.05	531.21	650.57		9.05	536.06	650.57		9.05	482.21	650.57
9.07	508.72	651.67		9.07	575.73	651.67		9.07	557.27	651.67		9.07	486.98	651.67
9.08	600.73	652.76		9.08	557.26	652.76		9.08	550.24	652.76		9.08	503.33	652.76
9.1	498.56	653.86		9.1	528.8	653.86		9.1	529.97	653.86		9.1	481.84	653.86
9.12	586.18	654.95		9.12	561.87	654.95		9.12	499.09	654.95		9.12	547.04	654.95
9.13	566.39	656.04		9.13	563.96	656.04		9.13	535.25	656.04		9.13	483.56	656.04
9.15	510.4	657.14		9.15	518.51	657.14		9.15	510.43	657.14		9.15	503.92	657.14
9.17	549.71	658.23		9.17	461.51	658.23		9.17	654.78	658.23		9.17	570.58	658.23
9.18	557.09	659.32		9.18	552.12	659.32		9.18	526.94	659.32		9.18	554.46	659.32
9.2	526.44	660.41		9.2	600.71	660.41		9.2	526.64	660.41		9.2	450.39	660.41
9.22	572.59	661.51		9.22	619.78	661.51		9.22	505.72	661.51		9.22	528.16	661.51
9.23	587.43	662.6		9.23	620.02	662.6		9.23	537.23	662.6		9.23	661.05	662.6
9.25	477.08	663.69		9.25	590.22	663.69		9.25	502.09	663.69		9.25	609.01	663.69
9.27	517.12	664.79		9.27	624.16	664.79		9.27	542.5	664.79		9.27	618.83	664.79
9.28	546.64	665.88		9.28	581.09	665.88		9.28	535.53	665.88		9.28	530.24	665.88
9.3	553.03	666.97		9.3	594.83	666.97		9.3	574.59	666.97		9.3	521.47	666.97
9.32	538.8	668.06		9.32	611.58	668.06		9.32	512.37	668.06		9.32	654.64	668.06
9.33	443.2	669.16		9.33	561.82	669.16		9.33	572.94	669.16		9.33	540.35	669.16
9.35	488.89	670.25		9.35	542.66	670.25		9.35	483.59	670.25		9.35	525.35	670.25
9.37	512.2	671.34		9.37	530.36	671.34		9.37	546.48	671.34		9.37	689.42	671.34
9.38	467.79	672.43		9.38	492.07	672.43		9.38	504.02	672.43		9.38	640.58	672.43
9.4	639.63	673.52		9.4	498.96	673.52		9.4	480.16	673.52		9.4	667.44	673.52
9.42	563.29	674.62		9.42	503.75	674.62		9.42	598.21	674.62		9.42	620.08	674.62
9.43	590.96	675.71		9.43	648.91	675.71		9.43	575.51	675.71		9.43	603.77	675.71
9.45	502.18	676.8		9.45	597.65	676.8		9.45	622.36	676.8		9.45	531.21	676.8
9.47	553.39	677.89		9.47	626.46	677.89		9.47	625.96	677.89		9.47	557.7	677.89
9.48	563.63	678.98		9.48	508.45	678.98		9.48	662.8	678.98		9.48	567.92	678.98
9.5	547.35	680.07		9.5	548.19	680.07		9.5	512.11	680.07		9.5	547.3	680.07
9.52	510.42	681.17		9.52	532.77	681.17		9.52	600.7	681.17		9.52	574.63	681.17
9.53	486.77	682.26		9.53	633.75	682.26		9.53	534.28	682.26		9.53	448.01	682.26
9.55	455.44	683.35		9.55	597.58	683.35		9.55	526.21	683.35		9.55	481.82	683.35
9.57	635.71	684.44		9.57	578.12	684.44		9.57	548.45	684.44		9.57	551.97	684.44
9.58	637.65	685.53		9.58	563.43	685.53		9.58	523.88	685.53		9.58	581.28	685.53
9.6	497.38	686.62		9.6	569.42	686.62		9.6	560.83	686.62		9.6	583.45	686.62
9.62	532.8	687.71		9.62	557.94	687.71		9.62	576.53	687.71		9.62	534.35	687.71
9.63	614.59	688.8		9.63	612.24	688.8		9.63	680.43	688.8		9.63	617.58	688.8
9.65	605.43	689.89		9.65	553.06	689.89		9.65	570.08	689.89		9.65	632.44	689.89
9.67	561.18	690.99		9.67	555.85	690.99		9.67	561.06	690.99		9.67	535.62	690.99
9.68	545.6	692.08		9.68	604.87	692.08		9.68	602	692.08		9.68	581.33	692.08
9.7	644.33	693.17		9.7	583.88	693.17		9.7	605.36	693.17		9.7	489.06	693.17
9.72	504.07	694.26		9.72	618.72	694.26		9.72	624.7	694.26		9.72	588.01	694.26
9.73	486.67	695.35		9.73	598.66	695.35		9.73	541.63	695.35		9.73	701.18	695.35
9.75	556.96	696.44		9.75	574.34	696.44		9.75	528.95	696.44		9.75	631.51	696.44
9.77	561.02	697.53		9.77	685.11	697.53		9.77	578.34	697.53		9.77	590.68	697.53
9.78	558.61	698.62		9.78	690.25	698.62		9.78	603.95	698.62		9.78	557.7	698.62
9.8	511.11	699.71		9.8	615.51	699.71		9.8	617.39	699.71		9.8	573.77	699.71
9.82	549.11	700.8		9.82	592.66	700.8		9.82	573.83	700.8		9.82	557.72	700.8
9.83	619.48	701.89		9.83	683.84	701.89		9.83	515.32	701.89		9.83	610.13	701.89
9.85	643.35	702.98		9.85	576.89	702.98		9.85	561.13	702.98		9.85	623.24	702.98
9.87	600.68	704.07		9.87	552.32	704.07		9.87	594.72	704.07		9.87	539.68	704.07
9.88	615.36	705.16		9.88	562.72	705.16		9.88	578.87	705.16		9.88	646.17	705.16
9.9	610.62	706.25		9.9	486.85	706.25		9.9	572.97	706.25		9.9	540.5	706.25
9.92	578.38	707.34		9.92	586.66	707.34		9.92	565.89	707.34		9.92	707.78	707.34
9.93	536.24	708.43		9.93	582.66	708.43		9.93	632.82	708.43		9.93	574.75	708.43
9.95	544.23	709.52		9.95	640.17	709.52		9.95	551.89	709.52		9.95	637.83	709.52
9.97	638.43	710.61		9.97	594.09	710.61		9.97	581.18	710.61		9.97	581.81	710.61
9.98	622.61	711.69		9.98	712.13	711.69		9.98	609.29	711.69		9.98	611.98	711.69
10	598.1	712.78		10	631.1	712.78		10	536.27	712.78		10	663.94	712.78
10.02	603.72	713.87		10.02	677.03	713.87		10.02	737.85	713.87		10.02	563.09	713.87
10.03	561.57	714.96		10.03	653.68	714.96		10.03	735.09	714.96		10.03	625.25	714.96
10.05	675.66	716.05		10.05	644.53	716.05		10.05	652.15	716.05		10.05	725.47	716.05
10.07	566.19	717.14		10.07	612.43	717.14		10.07	564.77	717.14		10.07	666.48	717.14
10.08	637.16	718.23		10.08	676.29	718.23		10.08	582.02	718.23		10.08	599.95	718.23
10.1	584.63	719.32		10.1	600.46	719.32		10.1	580.7	719.32		10.1	550.17	719.32
10.12	641.16	720.41		10.12	541.84	720.41		10.12	638.74	720.41		10.12	562.56	720.41
10.13	589.35	721.49		10.13	605.65	721.49		10.13	615.32	721.49		10.13	582.73	721.49
10.15	675.79	722.58		10.15	596.14	722.58		10.15	611.01	722.58		10.15	576.45	722.58
10.17	618.38	723.67		10.17	637.96	723.67		10.17	558.46	723.67		10.17	648.03	723.67
10.18	618.84	724.76		10.18	586.15	724.76		10.18	622.6	724.76		10.18	552.93	724.76
10.2	596.17	725.85		10.2	590.79	725.85		10.2	633.85	725.85		10.2	574.79	725.85
10.22	658.52	726.94		10.22	601.15	726.94		10.22	629.89	726.94		10.22	588.21	726.94
10.23	646.51	728.02		10.23	612.62	728.02		10.23	717.03	728.02		10.23	570.34	728.02
10.25	679.7	729.11		10.25	644.7	729.11		10.25	645.66	729.11		10.25	645.15	729.11
10.27	602.2	730.2		10.27	659.91	730.2		10.27	652.39	730.2		10.27	614.68	730.2
10.28	653.02	731.29		10.28	654.92	731.29		10.28	656.01	731.29		10.28	609.62	731.29
10.3	602.28	732.38		10.3	743.42	732.38		10.3	578.17	732.38		10.3	612.69	732.38
10.32	598.5	733.46		10.32	652.5	733.46		10.32	578.88	733.46		10.32	558.46	733.46
10.33	642.63	734.55		10.33	703.98	734.55		10.33	612.42	734.55		10.33	527.53	734.55
10.35	602.88	735.64		10.35	628.79	735.64		10.35	651.59	735.64		10.35	572.09	735.64
10.37	597.66	736.73		10.37	645.35	736.73		10.37	552.06	736.73		10.37	585.98	736.73
10.38	631.24	737.82		10.38	611.8	737.82		10.38	677.18	737.82		10.38	564.52	737.82
10.4	619.59	738.9		10.4	675.07	738.9		10.4	607.95	738.9		10.4	739.04	738.9
10.42	638.98	739.99		10.42	552.44	739.99		10.42	603.3	739.99		10.42	635.96	739.99
10.43	646.97	741.08		10.43	573.82	741.08		10.43	599.65	741.08		10.43	550.75	741.08
10.45	645.39	742.16		10.45	551.02	742.16		10.45	646.66	742.16		10.45	576.9	742.16
10.47	637.93	743.25		10.47	569.69	743.25		10.47	679.42	743.25		10.47	634.89	743.25
10.48	579.89	744.34		10.48	670.12	744.34		10.48	583.27	744.34		10.48	634.11	744.34
10.5	568.78	745.43		10.5	639.95	745.43		10.5	603.83	745.43		10.5	624.66	745.43
10.52	570.1	746.51		10.52	692.11	746.51		10.52	621.86	746.51		10.52	646.38	746.51
10.53	621.09	747.6		10.53	755.3	747.6		10.53	604.18	747.6		10.53	638.8	747.6
10.55	673.46	748.69		10.55	782.49	748.69		10.55	600.31	748.69		10.55	622.33	748.69
10.57	603.57	749.77		10.57	734.86	749.77		10.57	537.12	749.77		10.57	587.05	749.77
10.58	750.81	750.86		10.58	746.73	750.86		10.58	551.72	750.86		10.58	617.96	750.86
10.6	633.91	751.95		10.6	738.67	751.95		10.6	601.14	751.95		10.6	604.7	751.95
10.62	682.63	753.03		10.62	773.94	753.03		10.62	615.05	753.03		10.62	721.26	753.03
10.63	620.77	754.12		10.63	712.1	754.12		10.63	661.03	754.12		10.63	630.71	754.12
10.65	712.65	755.21		10.65	743.8	755.21		10.65	604.63	755.21		10.65	648.6	755.21
10.67	565.61	756.29		10.67	615.02	756.29		10.67	645.18	756.29		10.67	572.15	756.29
10.68	652.42	757.38		10.68	629.67	757.38		10.68	572.7	757.38		10.68	760.26	757.38
10.7	645.22	758.47		10.7	628.58	758.47		10.7	583.5	758.47		10.7	769.49	758.47
10.72	615.21	759.55		10.72	631.2	759.55		10.72	656.87	759.55		10.72	688.08	759.55
10.73	640.82	760.64		10.73	625.61	760.64		10.73	682.31	760.64		10.73	699.98	760.64
10.75	693.69	761.72		10.75	580.67	761.72		10.75	637.66	761.72		10.75	771.49	761.72
10.77	644.73	762.81		10.77	594.32	762.81		10.77	687.95	762.81		10.77	727.68	762.81
10.78	660.75	763.9		10.78	639.79	763.9		10.78	724.98	763.9		10.78	640.98	763.9
10.8	676.32	764.98		10.8	644.12	764.98		10.8	758.02	764.98		10.8	620.76	764.98
10.82	672.24	766.07		10.82	670.34	766.07		10.82	639.85	766.07		10.82	646.2	766.07
10.83	607.23	767.15		10.83	590.62	767.15		10.83	672.32	767.15		10.83	621.62	767.15
10.85	744.37	768.24		10.85	640.39	768.24		10.85	755.05	768.24		10.85	685.96	768.24
10.87	559.79	769.32		10.87	693.49	769.32		10.87	677.99	769.32		10.87	678.52	769.32
10.88	579.1	770.41		10.88	694.64	770.41		10.88	662.99	770.41		10.88	625.49	770.41
10.9	651.34	771.49		10.9	629.6	771.49		10.9	617.49	771.49		10.9	637.93	771.49
10.92	627.63	772.58		10.92	603.32	772.58		10.92	593.21	772.58		10.92	693.18	772.58
10.93	586.26	773.67		10.93	732.29	773.67		10.93	633.16	773.67		10.93	759.29	773.67
10.95	652.48	774.75		10.95	670.88	774.75		10.95	643.54	774.75		10.95	601.32	774.75
10.97	734.41	775.84		10.97	653.69	775.84		10.97	621.47	775.84		10.97	626.86	775.84
10.98	590.89	776.92		10.98	659.19	776.92		10.98	705.06	776.92		10.98	618.44	776.92
11	673.84	778.01		11	698.56	778.01		11	733.09	778.01		11	587.64	778.01
11.02	609.95	779.09		11.02	646.53	779.09		11.02	674.36	779.09		11.02	742.37	779.09
11.03	649.23	780.18		11.03	606.16	780.18		11.03	642.84	780.18		11.03	616.44	780.18
11.05	744.23	781.26		11.05	755.84	781.26		11.05	749.24	781.26		11.05	586.6	781.26
11.07	762.74	782.35		11.07	701.86	782.35		11.07	646.25	782.35		11.07	722.53	782.35
11.08	655.78	783.43		11.08	652.61	783.43		11.08	687.12	783.43		11.08	664.74	783.43
11.1	604.46	784.52		11.1	628.87	784.52		11.1	658.49	784.52		11.1	712.17	784.52
11.12	675.42	785.6		11.12	624.71	785.6		11.12	676.06	785.6		11.12	738.05	785.6
11.13	571.2	786.68		11.13	572.07	786.68		11.13	617.51	786.68		11.13	694.91	786.68
11.15	685.85	787.77		11.15	690.61	787.77		11.15	626.45	787.77		11.15	724.87	787.77
11.17	748.09	788.85		11.17	689.34	788.85		11.17	656.14	788.85		11.17	645.12	788.85
11.18	796.69	789.94		11.18	672.92	789.94		11.18	658.98	789.94		11.18	625.4	789.94
11.2	663.22	791.02		11.2	584.75	791.02		11.2	672.47	791.02		11.2	613.71	791.02
11.22	622.77	792.11		11.22	686.8	792.11		11.22	630.16	792.11		11.22	631.48	792.11
11.23	688.72	793.19		11.23	672.97	793.19		11.23	632.06	793.19		11.23	785.97	793.19
11.25	664.54	794.27		11.25	700.07	794.27		11.25	688.62	794.27		11.25	831.34	794.27
11.27	759.21	795.36		11.27	646.03	795.36		11.27	629.87	795.36		11.27	694.6	795.36
11.28	654.78	796.44		11.28	750.09	796.44		11.28	648.23	796.44		11.28	638.53	796.44
11.3	720.23	797.53		11.3	679.3	797.53		11.3	636.13	797.53		11.3	616.34	797.53
11.32	635.43	798.61		11.32	730.39	798.61		11.32	668.66	798.61		11.32	612	798.61
11.33	775.64	799.69		11.33	759.12	799.69		11.33	678.9	799.69		11.33	734.85	799.69
11.35	603.13	800.78		11.35	780.77	800.78		11.35	735.45	800.78		11.35	710.11	800.78
11.37	638.01	801.86		11.37	677.33	801.86		11.37	695.89	801.86		11.37	718.57	801.86
11.38	717.46	802.94		11.38	686.95	802.94		11.38	744.13	802.94		11.38	686.45	802.94
11.4	676.69	804.03		11.4	687.18	804.03		11.4	630.01	804.03		11.4	686.13	804.03
11.42	653.48	805.11		11.42	747.68	805.11		11.42	737.17	805.11		11.42	663.42	805.11
11.43	671.44	806.2		11.43	773.46	806.2		11.43	770.32	806.2		11.43	762.69	806.2
11.45	578.05	807.28		11.45	757.87	807.28		11.45	722.64	807.28		11.45	684.62	807.28
11.47	672.65	808.36		11.47	677.9	808.36		11.47	599.12	808.36		11.47	749.1	808.36
11.48	708.4	809.45		11.48	704.86	809.45		11.48	656.91	809.45		11.48	711.4	809.45
11.5	729.93	810.53		11.5	746.35	810.53		11.5	664.34	810.53		11.5	681.59	810.53
11.52	783.59	811.61		11.52	797.03	811.61		11.52	691.57	811.61		11.52	794.31	811.61
11.53	607.88	812.69		11.53	752.06	812.69		11.53	674.85	812.69		11.53	685.72	812.69
11.55	653.76	813.78		11.55	690.29	813.78		11.55	715.68	813.78		11.55	719.9	813.78
11.57	621.41	814.86		11.57	768.47	814.86		11.57	742.83	814.86		11.57	684.17	814.86
11.58	647.58	815.94		11.58	791.48	815.94		11.58	714.55	815.94		11.58	695.09	815.94
11.6	713.3	817.03		11.6	753.91	817.03		11.6	612.89	817.03		11.6	697.4	817.03
11.62	665.98	818.11		11.62	810.45	818.11		11.62	699.45	818.11		11.62	678.73	818.11
11.63	696.5	819.19		11.63	767.65	819.19		11.63	741.07	819.19		11.63	832.54	819.19
11.65	726.2	820.27		11.65	820.54	820.27		11.65	689.06	820.27		11.65	891.22	820.27
11.67	686.68	821.36		11.67	868.87	821.36		11.67	667.68	821.36		11.67	699.27	821.36
11.68	757.98	822.44		11.68	795.75	822.44		11.68	711.6	822.44		11.68	752.97	822.44
11.7	711.12	823.52		11.7	813.55	823.52		11.7	702.6	823.52		11.7	924.65	823.52
11.72	670.93	824.6		11.72	755.43	824.6		11.72	685.89	824.6		11.72	1132.72	824.6
11.73	675.82	825.69		11.73	674.88	825.69		11.73	630.22	825.69		11.73	998.68	825.69
11.75	819.6	826.77		11.75	716.67	826.77		11.75	678.33	826.77		11.75	885.19	826.77
11.77	763.1	827.85		11.77	688.46	827.85		11.77	591.31	827.85		11.77	744.56	827.85
11.78	698.78	828.93		11.78	706.83	828.93		11.78	759.04	828.93		11.78	756.35	828.93
11.8	722.88	830.02		11.8	804.2	830.02		11.8	730.41	830.02		11.8	769.47	830.02
11.82	687.88	831.1		11.82	729.64	831.1		11.82	863.89	831.1		11.82	721	831.1
11.83	726.16	832.18		11.83	805.61	832.18		11.83	793.29	832.18		11.83	638.99	832.18
11.85	849.48	833.26		11.85	807.82	833.26		11.85	817.58	833.26		11.85	716.73	833.26
11.87	973.44	834.34		11.87	827.95	834.34		11.87	688.83	834.34		11.87	710.72	834.34
11.88	713.17	835.43		11.88	794.32	835.43		11.88	742.3	835.43		11.88	638.89	835.43
11.9	705.3	836.51		11.9	725.22	836.51		11.9	693.79	836.51		11.9	664.51	836.51
11.92	692.31	837.59		11.92	755.44	837.59		11.92	734.27	837.59		11.92	612.46	837.59
11.93	698.31	838.67		11.93	785.05	838.67		11.93	805.85	838.67		11.93	646.73	838.67
11.95	771.18	839.75		11.95	808.78	839.75		11.95	790.54	839.75		11.95	649.83	839.75
11.97	775.2	840.83		11.97	773.87	840.83		11.97	728.86	840.83		11.97	683.22	840.83
11.98	753.99	841.91		11.98	818.49	841.91		11.98	680.06	841.91		11.98	672.88	841.91
12	737.27	843		12	712.74	843		12	695.22	843		12	644.03	843
12.02	695.42	844.08		12.02	772.9	844.08		12.02	695.02	844.08		12.02	645.2	844.08
12.03	730.95	845.16		12.03	701.26	845.16		12.03	792.9	845.16		12.03	757.76	845.16
12.05	691.2	846.24		12.05	684.63	846.24		12.05	812.48	846.24		12.05	691.6	846.24
12.07	731.83	847.32		12.07	647.37	847.32		12.07	749.32	847.32		12.07	710.11	847.32
12.08	698.53	848.4		12.08	785.45	848.4		12.08	668.22	848.4		12.08	640.89	848.4
12.1	754.84	849.48		12.1	752.29	849.48		12.1	734.26	849.48		12.1	640.18	849.48
12.12	748.62	850.56		12.12	811.41	850.56		12.12	665.66	850.56		12.12	769.74	850.56
12.13	677.74	851.65		12.13	707.26	851.65		12.13	649.56	851.65		12.13	701.12	851.65
12.15	733.87	852.73		12.15	750.57	852.73		12.15	737.94	852.73		12.15	698.15	852.73
12.17	753.6	853.81		12.17	784.14	853.81		12.17	769.77	853.81		12.17	703.6	853.81
12.18	633.7	854.89		12.18	720.87	854.89		12.18	672.35	854.89		12.18	659.54	854.89
12.2	657.17	855.97		12.2	673.55	855.97		12.2	652.05	855.97		12.2	723.85	855.97
12.22	698.54	857.05		12.22	662.51	857.05		12.22	711.48	857.05		12.22	628.76	857.05
12.23	778.37	858.13		12.23	749.94	858.13		12.23	728.68	858.13		12.23	665.8	858.13
12.25	758.15	859.21		12.25	740.63	859.21		12.25	683.88	859.21		12.25	646.09	859.21
12.27	745.77	860.29		12.27	728.84	860.29		12.27	699.54	860.29		12.27	607.17	860.29
12.28	808.89	861.37		12.28	725.72	861.37		12.28	712.43	861.37		12.28	728.18	861.37
12.3	784.05	862.45		12.3	832.74	862.45		12.3	724.93	862.45		12.3	890.31	862.45
12.32	687.69	863.53		12.32	744.17	863.53		12.32	711.65	863.53		12.32	791.91	863.53
12.33	711.61	864.61		12.33	731.09	864.61		12.33	741.97	864.61		12.33	667.9	864.61
12.35	686.59	865.69		12.35	777.78	865.69		12.35	748.38	865.69		12.35	614.85	865.69
12.37	703.27	866.77		12.37	732.62	866.77		12.37	692.91	866.77		12.37	714.44	866.77
12.38	799.77	867.85		12.38	748.97	867.85		12.38	805.5	867.85		12.38	753.42	867.85
12.4	704.03	868.93		12.4	705.47	868.93		12.4	829.1	868.93		12.4	681.18	868.93
12.42	675.18	870.01		12.42	686.75	870.01		12.42	732.01	870.01		12.42	637.27	870.01
12.43	718.49	871.09		12.43	731.29	871.09		12.43	708.87	871.09		12.43	716.4	871.09
12.45	714.04	872.17		12.45	733.03	872.17		12.45	757.68	872.17		12.45	683.7	872.17
12.47	655.2	873.25		12.47	860.72	873.25		12.47	726.43	873.25		12.47	628.4	873.25
12.48	691.33	874.33		12.48	710.24	874.33		12.48	696.24	874.33		12.48	713.89	874.33
12.5	696.57	875.41		12.5	686.53	875.41		12.5	768.95	875.41		12.5	765.25	875.41
12.52	743.58	876.49		12.52	718.93	876.49		12.52	787.94	876.49		12.52	739.94	876.49
12.53	784.57	877.57		12.53	746.9	877.57		12.53	726.19	877.57		12.53	783.45	877.57
12.55	687.2	878.65		12.55	693.75	878.65		12.55	874.77	878.65		12.55	797.79	878.65
12.57	733.03	879.73		12.57	788.84	879.73		12.57	800.16	879.73		12.57	735.41	879.73
12.58	718.77	880.81		12.58	859.29	880.81		12.58	754.34	880.81		12.58	729.53	880.81
12.6	752.81	881.89		12.6	776	881.89		12.6	642.6	881.89		12.6	757.76	881.89
12.62	702.2	882.97		12.62	772.11	882.97		12.62	693.67	882.97		12.62	665.61	882.97
12.63	672.18	884.05		12.63	781.01	884.05		12.63	794.27	884.05		12.63	672.25	884.05
12.65	660.51	885.13		12.65	710.55	885.13		12.65	797.75	885.13		12.65	760.51	885.13
12.67	771.3	886.21		12.67	740.97	886.21		12.67	763.02	886.21		12.67	809.86	886.21
12.68	687.13	887.29		12.68	785.23	887.29		12.68	764.07	887.29		12.68	747.82	887.29
12.7	748.28	888.37		12.7	782.7	888.37		12.7	837.27	888.37		12.7	765.36	888.37
12.72	737.83	889.45		12.72	814.89	889.45		12.72	757.7	889.45		12.72	795.66	889.45
12.73	668.46	890.52		12.73	809.96	890.52		12.73	892.88	890.52		12.73	796.83	890.52
12.75	702.2	891.6		12.75	793.55	891.6		12.75	791.1	891.6		12.75	880.97	891.6
12.77	772.82	892.68		12.77	806.85	892.68		12.77	787.02	892.68		12.77	768.47	892.68
12.78	789.77	893.76		12.78	747.8	893.76		12.78	807.66	893.76		12.78	867.99	893.76
12.8	819.34	894.84		12.8	744.39	894.84		12.8	710.23	894.84		12.8	775.62	894.84
12.82	727.63	895.92		12.82	677.14	895.92		12.82	664.89	895.92		12.82	893.86	895.92
12.83	833.74	897		12.83	755.38	897		12.83	759.59	897		12.83	906.45	897
12.85	807.22	898.08		12.85	738.78	898.08		12.85	760.1	898.08		12.85	772.95	898.08
12.87	776.41	899.16		12.87	769.87	899.16		12.87	757.18	899.16		12.87	821.98	899.16
12.88	826.41	900.23		12.88	726.41	900.23		12.88	763.36	900.23		12.88	792.35	900.23
12.9	791.01	901.31		12.9	813.39	901.31		12.9	724.1	901.31		12.9	850.44	901.31
12.92	828.59	902.39		12.92	804.76	902.39		12.92	777.48	902.39		12.92	813.64	902.39
12.93	724.46	903.47		12.93	792.94	903.47		12.93	701.34	903.47		12.93	831.12	903.47
12.95	671.98	904.55		12.95	799.66	904.55		12.95	603.91	904.55		12.95	819.11	904.55
12.97	712.38	905.63		12.97	892.41	905.63		12.97	776.47	905.63		12.97	730.31	905.63
12.98	776.85	906.7		12.98	800.53	906.7		12.98	731.41	906.7		12.98	698.03	906.7
13	730.71	907.78		13	785.7	907.78		13	698.13	907.78		13	809.12	907.78
13.02	841.94	908.86		13.02	831.72	908.86		13.02	893.61	908.86		13.02	911.33	908.86
13.03	796.47	909.94		13.03	810.47	909.94		13.03	806.2	909.94		13.03	830.53	909.94
13.05	885.78	911.02		13.05	802.72	911.02		13.05	720.85	911.02		13.05	761.37	911.02
13.07	695.6	912.1		13.07	809.55	912.1		13.07	823.57	912.1		13.07	795.74	912.1
13.08	762.31	913.17		13.08	849.57	913.17		13.08	740.16	913.17		13.08	693.4	913.17
13.1	782.73	914.25		13.1	768.38	914.25		13.1	775.99	914.25		13.1	741.56	914.25
13.12	772.02	915.33		13.12	784.66	915.33		13.12	695.46	915.33		13.12	735.54	915.33
13.13	745.71	916.41		13.13	830.94	916.41		13.13	709.61	916.41		13.13	767.18	916.41
13.15	726.97	917.48		13.15	833.5	917.48		13.15	718.7	917.48		13.15	857.08	917.48
13.17	728.32	918.56		13.17	877.23	918.56		13.17	748.45	918.56		13.17	785.73	918.56
13.18	804.6	919.64		13.18	890.5	919.64		13.18	764.59	919.64		13.18	819.95	919.64
13.2	797.81	920.72		13.2	820.44	920.72		13.2	740.92	920.72		13.2	795.42	920.72
13.22	795.34	921.8		13.22	860.32	921.8		13.22	747.11	921.8		13.22	835.68	921.8
13.23	764.14	922.87		13.23	910.83	922.87		13.23	763.62	922.87		13.23	795.04	922.87
13.25	793.57	923.95		13.25	816.16	923.95		13.25	728.53	923.95		13.25	732.09	923.95
13.27	864.64	925.03		13.27	883.61	925.03		13.27	847	925.03		13.27	740.62	925.03
13.28	778.52	926.11		13.28	874.31	926.11		13.28	817.2	926.11		13.28	762.08	926.11
13.3	790.61	927.18		13.3	764.98	927.18		13.3	769.14	927.18		13.3	774.49	927.18
13.32	837.3	928.26		13.32	811.52	928.26		13.32	764.81	928.26		13.32	782.31	928.26
13.33	793.12	929.34		13.33	811.02	929.34		13.33	859.13	929.34		13.33	878.88	929.34
13.35	792.74	930.41		13.35	899.43	930.41		13.35	776.63	930.41		13.35	772.63	930.41
13.37	759.02	931.49		13.37	894.82	931.49		13.37	723.02	931.49		13.37	906.13	931.49
13.38	876.89	932.57		13.38	847.47	932.57		13.38	748.53	932.57		13.38	878.47	932.57
13.4	811.02	933.65		13.4	748.84	933.65		13.4	816.27	933.65		13.4	858.44	933.65
13.42	841.59	934.72		13.42	826.14	934.72		13.42	710.03	934.72		13.42	783.97	934.72
13.43	760.28	935.8		13.43	785.08	935.8		13.43	771.14	935.8		13.43	792.73	935.8
13.45	819.28	936.88		13.45	759.12	936.88		13.45	763.69	936.88		13.45	780.53	936.88
13.47	788.57	937.95		13.47	826.09	937.95		13.47	917.08	937.95		13.47	797.89	937.95
13.48	783.67	939.03		13.48	745.95	939.03		13.48	812.8	939.03		13.48	864.73	939.03
13.5	754.48	940.11		13.5	844.6	940.11		13.5	904.97	940.11		13.5	838	940.11
13.52	861.79	941.18		13.52	886.52	941.18		13.52	838.64	941.18		13.52	835.52	941.18
13.53	766.56	942.26		13.53	793.9	942.26		13.53	880.53	942.26		13.53	741.76	942.26
13.55	770.27	943.34		13.55	859.48	943.34		13.55	795.58	943.34		13.55	644.39	943.34
13.57	738.77	944.41		13.57	788.43	944.41		13.57	887.73	944.41		13.57	666.25	944.41
13.58	782.89	945.49		13.58	932.81	945.49		13.58	940.48	945.49		13.58	807.8	945.49
13.6	834.62	946.57		13.6	891.46	946.57		13.6	798.42	946.57		13.6	793.11	946.57
13.62	820.97	947.64		13.62	894.35	947.64		13.62	777.51	947.64		13.62	728.22	947.64
13.63	776.6	948.72		13.63	883.78	948.72		13.63	770.09	948.72		13.63	825.95	948.72
13.65	727.09	949.8		13.65	794.95	949.8		13.65	801.2	949.8		13.65	835.45	949.8
13.67	703.36	950.87		13.67	837.82	950.87		13.67	706.08	950.87		13.67	749.41	950.87
13.68	756.18	951.95		13.68	767.13	951.95		13.68	741.29	951.95		13.68	741.02	951.95
13.7	809.67	953.02		13.7	794.13	953.02		13.7	902.73	953.02		13.7	783.04	953.02
13.72	812.99	954.1		13.72	841.86	954.1		13.72	954.37	954.1		13.72	796.56	954.1
13.73	829.02	955.18		13.73	819.86	955.18		13.73	838.79	955.18		13.73	814.76	955.18
13.75	847.51	956.25		13.75	854.73	956.25		13.75	866.33	956.25		13.75	783.04	956.25
13.77	751.55	957.33		13.77	762.41	957.33		13.77	828.41	957.33		13.77	832.89	957.33
13.78	839.08	958.4		13.78	787.62	958.4		13.78	775.48	958.4		13.78	790.24	958.4
13.8	764.86	959.48		13.8	808.71	959.48		13.8	869.33	959.48		13.8	736	959.48
13.82	834.03	960.56		13.82	815.47	960.56		13.82	791.92	960.56		13.82	814.8	960.56
13.83	912.77	961.63		13.83	687.6	961.63		13.83	805.38	961.63		13.83	767.85	961.63
13.85	946.66	962.71		13.85	901.28	962.71		13.85	776.29	962.71		13.85	784.19	962.71
13.87	871.51	963.78		13.87	908.07	963.78		13.87	732.35	963.78		13.87	835.91	963.78
13.88	847.47	964.86		13.88	741.99	964.86		13.88	910.66	964.86		13.88	997.05	964.86
13.9	882.9	965.94		13.9	873.22	965.94		13.9	899.13	965.94		13.9	968.53	965.94
13.92	874.72	967.01		13.92	872.97	967.01		13.92	758.5	967.01		13.92	996.19	967.01
13.93	863.45	968.09		13.93	826.49	968.09		13.93	867.1	968.09		13.93	877.64	968.09
13.95	794.22	969.16		13.95	869.3	969.16		13.95	970.83	969.16		13.95	796.44	969.16
13.97	770.84	970.24		13.97	880.09	970.24		13.97	905.29	970.24		13.97	931.84	970.24
13.98	743.83	971.31		13.98	939.58	971.31		13.98	912.69	971.31		13.98	921.85	971.31
14	795.45	972.39		14	881.9	972.39		14	822.78	972.39		14	798.21	972.39
14.02	880.7	973.46		14.02	897.82	973.46		14.02	808.39	973.46		14.02	866.54	973.46
14.03	733.51	974.54		14.03	833.54	974.54		14.03	891.96	974.54		14.03	1029.82	974.54
14.05	845.41	975.61		14.05	888.86	975.61		14.05	822.61	975.61		14.05	1107.42	975.61
14.07	789.75	976.69		14.07	836.51	976.69		14.07	829.86	976.69		14.07	1084.42	976.69
14.08	829.76	977.76		14.08	850.07	977.76		14.08	748.42	977.76		14.08	958.39	977.76
14.1	943.69	978.84		14.1	834.23	978.84		14.1	783.13	978.84		14.1	907.49	978.84
14.12	825.2	979.91		14.12	871.76	979.91		14.12	956.53	979.91		14.12	758.17	979.91
14.13	794.12	980.99		14.13	810.79	980.99		14.13	837.05	980.99		14.13	751.73	980.99
14.15	883.08	982.06		14.15	972.88	982.06		14.15	913.29	982.06		14.15	854.38	982.06
14.17	802.12	983.14		14.17	907.86	983.14		14.17	1039.26	983.14		14.17	831.54	983.14
14.18	811.18	984.21		14.18	891.78	984.21		14.18	1078.62	984.21		14.18	840.02	984.21
14.2	853.38	985.29		14.2	933.86	985.29		14.2	909.27	985.29		14.2	838.81	985.29
14.22	911.42	986.36		14.22	892.42	986.36		14.22	1029.97	986.36		14.22	813.75	986.36
14.23	813.52	987.44		14.23	805.04	987.44		14.23	894.57	987.44		14.23	856.86	987.44
14.25	753.19	988.51		14.25	877.52	988.51		14.25	818.45	988.51		14.25	746.02	988.51
14.27	781.86	989.59		14.27	843.56	989.59		14.27	823.84	989.59		14.27	856.4	989.59
14.28	801	990.66		14.28	869.57	990.66		14.28	798.57	990.66		14.28	763.5	990.66
14.3	834.09	991.74		14.3	935.16	991.74		14.3	927.98	991.74		14.3	770.54	991.74
14.32	858.69	992.81		14.32	787.94	992.81		14.32	1010.4	992.81		14.32	854.95	992.81
14.33	836.26	993.89		14.33	818.58	993.89		14.33	945.91	993.89		14.33	983.59	993.89
14.35	860.96	994.96		14.35	824.38	994.96		14.35	892.24	994.96		14.35	932.85	994.96
14.37	807.46	996.04		14.37	851.05	996.04		14.37	854.12	996.04		14.37	932.22	996.04
14.38	817.11	997.11		14.38	892.55	997.11		14.38	844.42	997.11		14.38	870.6	997.11
14.4	797	998.18		14.4	837.68	998.18		14.4	735.7	998.18		14.4	832.01	998.18
14.42	850.99	999.26		14.42	842.81	999.26		14.42	701.46	999.26		14.42	780.14	999.26
14.43	884.59	1000.33		14.43	826.72	1000.33		14.43	846.85	1000.33		14.43	791.99	1000.33
14.45	853.84	1001.41		14.45	872.88	1001.41		14.45	1005.72	1001.41		14.45	840.8	1001.41
14.47	878.43	1002.48		14.47	874.55	1002.48		14.47	940.18	1002.48		14.47	844.46	1002.48
14.48	821.42	1003.56		14.48	852.79	1003.56		14.48	860.41	1003.56		14.48	807.51	1003.56
14.5	966.08	1004.63		14.5	876.92	1004.63		14.5	845.88	1004.63		14.5	767.6	1004.63
14.52	798.46	1005.7		14.52	919.59	1005.7		14.52	767.78	1005.7		14.52	855.06	1005.7
14.53	842.87	1006.78		14.53	940.21	1006.78		14.53	782.5	1006.78		14.53	781.75	1006.78
14.55	940.7	1007.85		14.55	864.99	1007.85		14.55	843.19	1007.85		14.55	924.97	1007.85
14.57	900.11	1008.93		14.57	914.92	1008.93		14.57	766.47	1008.93		14.57	959.6	1008.93
14.58	797.63	1010		14.58	883.21	1010		14.58	779.38	1010		14.58	840.9	1010
14.6	893.18	1011.07		14.6	983.65	1011.07		14.6	830.5	1011.07		14.6	875.01	1011.07
14.62	814.93	1012.15		14.62	939.48	1012.15		14.62	864.48	1012.15		14.62	872.11	1012.15
14.63	874.43	1013.22		14.63	908.71	1013.22		14.63	813.79	1013.22		14.63	1009.63	1013.22
14.65	774.26	1014.29		14.65	971.35	1014.29		14.65	862.67	1014.29		14.65	1056.58	1014.29
14.67	825.91	1015.37		14.67	891.17	1015.37		14.67	920.73	1015.37		14.67	987.29	1015.37
14.68	857.81	1016.44		14.68	859.54	1016.44		14.68	913.98	1016.44		14.68	894.42	1016.44
14.7	861.74	1017.52		14.7	932.06	1017.52		14.7	871.28	1017.52		14.7	872.87	1017.52
14.72	823.14	1018.59		14.72	943.09	1018.59		14.72	874.74	1018.59		14.72	830.49	1018.59
14.73	935.04	1019.66		14.73	945.43	1019.66		14.73	886.8	1019.66		14.73	839.01	1019.66
14.75	870.19	1020.74		14.75	1036.49	1020.74		14.75	906.42	1020.74		14.75	940.41	1020.74
14.77	891.8	1021.81		14.77	987.91	1021.81		14.77	838.45	1021.81		14.77	876.5	1021.81
14.78	795.92	1022.88		14.78	936.16	1022.88		14.78	826.18	1022.88		14.78	797.99	1022.88
14.8	883.85	1023.96		14.8	852.19	1023.96		14.8	825.59	1023.96		14.8	837.62	1023.96
14.82	868.52	1025.03		14.82	842.69	1025.03		14.82	841.25	1025.03		14.82	824.48	1025.03
14.83	854.17	1026.1		14.83	822.32	1026.1		14.83	875.53	1026.1		14.83	817.14	1026.1
14.85	809.45	1027.18		14.85	891.77	1027.18		14.85	867.68	1027.18		14.85	920.55	1027.18
14.87	842.47	1028.25		14.87	958.35	1028.25		14.87	911.3	1028.25		14.87	967.04	1028.25
14.88	838.3	1029.32		14.88	895.03	1029.32		14.88	883.45	1029.32		14.88	830.47	1029.32
14.9	794.89	1030.39		14.9	878.57	1030.39		14.9	894.92	1030.39		14.9	917.98	1030.39
14.92	778.73	1031.47		14.92	908.05	1031.47		14.92	995	1031.47		14.92	790.45	1031.47
14.93	846.93	1032.54		14.93	883.99	1032.54		14.93	881.84	1032.54		14.93	816.65	1032.54
14.95	851.64	1033.61		14.95	905.06	1033.61		14.95	848.8	1033.61		14.95	829.46	1033.61
14.97	882.48	1034.69		14.97	956.79	1034.69		14.97	910.91	1034.69		14.97	909.74	1034.69
14.98	947.55	1035.76		14.98	925.18	1035.76		14.98	844.06	1035.76		14.98	861.98	1035.76
15	906.34	1036.83		15	935.44	1036.83		15	845.41	1036.83		15	888.01	1036.83
15.02	845.59	1037.91		15.02	910.25	1037.91		15.02	898.94	1037.91		15.02	850.99	1037.91
15.03	876.98	1038.98		15.03	974.79	1038.98		15.03	1005.31	1038.98		15.03	903.68	1038.98
15.05	825.38	1040.05		15.05	941.75	1040.05		15.05	964.59	1040.05		15.05	1023.86	1040.05
15.07	868.23	1041.12		15.07	947.45	1041.12		15.07	889.94	1041.12		15.07	994.58	1041.12
15.08	932.89	1042.2		15.08	1040.29	1042.2		15.08	915.23	1042.2		15.08	1056.65	1042.2
15.1	902.69	1043.27		15.1	1032.92	1043.27		15.1	857.65	1043.27		15.1	1037.43	1043.27
15.12	913.9	1044.34		15.12	975.43	1044.34		15.12	916.45	1044.34		15.12	1009.35	1044.34
15.13	822.3	1045.41		15.13	1093.22	1045.41		15.13	878.59	1045.41		15.13	986.08	1045.41
15.15	872.52	1046.49		15.15	931.64	1046.49		15.15	977.27	1046.49		15.15	890.12	1046.49
15.17	881.26	1047.56		15.17	820.6	1047.56		15.17	878.5	1047.56		15.17	876.14	1047.56
15.18	940.55	1048.63		15.18	893.89	1048.63		15.18	919.5	1048.63		15.18	903.2	1048.63
15.2	945.84	1049.7		15.2	936.44	1049.7		15.2	798.65	1049.7		15.2	938.67	1049.7
15.22	978.25	1050.78		15.22	1012.08	1050.78		15.22	850.87	1050.78		15.22	949.44	1050.78
15.23	911.45	1051.85		15.23	1089.31	1051.85		15.23	924.72	1051.85		15.23	895.32	1051.85
15.25	905.68	1052.92		15.25	1036.97	1052.92		15.25	955.24	1052.92		15.25	934.81	1052.92
15.27	813.99	1053.99		15.27	911.61	1053.99		15.27	842.39	1053.99		15.27	852.24	1053.99
15.28	938.09	1055.06		15.28	908.8	1055.06		15.28	921.37	1055.06		15.28	871.15	1055.06
15.3	925.19	1056.14		15.3	920.3	1056.14		15.3	901.97	1056.14		15.3	861.77	1056.14
15.32	926.94	1057.21		15.32	1019.69	1057.21		15.32	932.11	1057.21		15.32	784.37	1057.21
15.33	939.31	1058.28		15.33	978.41	1058.28		15.33	957.56	1058.28		15.33	786.91	1058.28
15.35	963.85	1059.35		15.35	967.85	1059.35		15.35	1076.68	1059.35		15.35	877.98	1059.35
15.37	1051.45	1060.42		15.37	869.96	1060.42		15.37	1014.17	1060.42		15.37	858.73	1060.42
15.38	941.12	1061.5		15.38	840.26	1061.5		15.38	1026.24	1061.5		15.38	870.95	1061.5
15.4	852.2	1062.57		15.4	952.61	1062.57		15.4	1030.86	1062.57		15.4	837.36	1062.57
15.42	902.37	1063.64		15.42	888.15	1063.64		15.42	964.84	1063.64		15.42	999.24	1063.64
15.43	873.63	1064.71		15.43	914.25	1064.71		15.43	952	1064.71		15.43	880.09	1064.71
15.45	919.21	1065.78		15.45	893.44	1065.78		15.45	906.27	1065.78		15.45	939.64	1065.78
15.47	970.12	1066.86		15.47	910.01	1066.86		15.47	932.01	1066.86		15.47	983.71	1066.86
15.48	959.68	1067.93		15.48	946.99	1067.93		15.48	910.07	1067.93		15.48	920.64	1067.93
15.5	999.78	1069		15.5	821.53	1069		15.5	1028.62	1069		15.5	847.84	1069
15.52	947.01	1070.07		15.52	884.64	1070.07		15.52	1029.29	1070.07		15.52	946.66	1070.07
15.53	966.76	1071.14		15.53	953.7	1071.14		15.53	968.59	1071.14		15.53	937.67	1071.14
15.55	909.97	1072.21		15.55	970.38	1072.21		15.55	893.83	1072.21		15.55	900.56	1072.21
15.57	909.28	1073.29		15.57	956.33	1073.29		15.57	973.74	1073.29		15.57	921.28	1073.29
15.58	872.64	1074.36		15.58	895.44	1074.36		15.58	893.61	1074.36		15.58	829.6	1074.36
15.6	846.22	1075.43		15.6	909.35	1075.43		15.6	936.54	1075.43		15.6	917.36	1075.43
15.62	961.26	1076.5		15.62	934.32	1076.5		15.62	898.03	1076.5		15.62	918.45	1076.5
15.63	898.91	1077.57		15.63	850.15	1077.57		15.63	858.87	1077.57		15.63	948.51	1077.57
15.65	902.59	1078.64		15.65	847.15	1078.64		15.65	965.98	1078.64		15.65	916.67	1078.64
15.67	892.38	1079.71		15.67	939.39	1079.71		15.67	906.46	1079.71		15.67	935.59	1079.71
15.68	864	1080.78		15.68	966.28	1080.78		15.68	1007.99	1080.78		15.68	869.07	1080.78
15.7	859.38	1081.86		15.7	909.72	1081.86		15.7	1057.27	1081.86		15.7	947.33	1081.86
15.72	929.58	1082.93		15.72	1004.61	1082.93		15.72	945.79	1082.93		15.72	980.33	1082.93
15.73	945.01	1084		15.73	949.99	1084		15.73	974.67	1084		15.73	941.62	1084
15.75	941.34	1085.07		15.75	968.89	1085.07		15.75	946.93	1085.07		15.75	1024.57	1085.07
15.77	967.18	1086.14		15.77	868.56	1086.14		15.77	990.87	1086.14		15.77	992.51	1086.14
15.78	1012.12	1087.21		15.78	930.01	1087.21		15.78	971.82	1087.21		15.78	948.85	1087.21
15.8	1066.33	1088.28		15.8	982.48	1088.28		15.8	968.16	1088.28		15.8	970.64	1088.28
15.82	1159.91	1089.35		15.82	1118.87	1089.35		15.82	833.91	1089.35		15.82	943.08	1089.35
15.83	1115.62	1090.42		15.83	1064.84	1090.42		15.83	897.64	1090.42		15.83	938.36	1090.42
15.85	927.28	1091.49		15.85	1014.06	1091.49		15.85	935.96	1091.49		15.85	900.49	1091.49
15.87	943.63	1092.57		15.87	1000.78	1092.57		15.87	854.2	1092.57		15.87	890.53	1092.57
15.88	973.31	1093.64		15.88	1130.08	1093.64		15.88	844.85	1093.64		15.88	842.64	1093.64
15.9	937.48	1094.71		15.9	1058.45	1094.71		15.9	889.93	1094.71		15.9	897.71	1094.71
15.92	822.46	1095.78		15.92	1048.54	1095.78		15.92	942.9	1095.78		15.92	939.41	1095.78
15.93	905.95	1096.85		15.93	934.57	1096.85		15.93	937.05	1096.85		15.93	883.66	1096.85
15.95	1012.2	1097.92		15.95	983.85	1097.92		15.95	917.79	1097.92		15.95	925.68	1097.92
15.97	895.72	1098.99		15.97	1088.63	1098.99		15.97	970.49	1098.99		15.97	955.26	1098.99
15.98	894.11	1100.06		15.98	1024.49	1100.06		15.98	1000.69	1100.06		15.98	943.02	1100.06
16	887.72	1101.13		16	928.07	1101.13		16	900.05	1101.13		16	903.97	1101.13
16.02	905.42	1102.2		16.02	952.08	1102.2		16.02	946.97	1102.2		16.02	949.96	1102.2
16.03	980.26	1103.27		16.03	968.06	1103.27		16.03	993.08	1103.27		16.03	1046.57	1103.27
16.05	957.13	1104.34		16.05	911.78	1104.34		16.05	938.51	1104.34		16.05	1057.67	1104.34
16.07	967.82	1105.41		16.07	961.77	1105.41		16.07	990.38	1105.41		16.07	1093.54	1105.41
16.08	952.89	1106.48		16.08	920.53	1106.48		16.08	1007.9	1106.48		16.08	1061.49	1106.48
16.1	938.26	1107.55		16.1	956.88	1107.55		16.1	954.22	1107.55		16.1	930.56	1107.55
16.12	894.78	1108.62		16.12	993.51	1108.62		16.12	943.11	1108.62		16.12	993.07	1108.62
16.13	928.54	1109.69		16.13	945.9	1109.69		16.13	1004.04	1109.69		16.13	898.52	1109.69
16.15	965.34	1110.76		16.15	940.24	1110.76		16.15	998.03	1110.76		16.15	930.09	1110.76
16.17	982.67	1111.83		16.17	906.48	1111.83		16.17	1014.99	1111.83		16.17	971.17	1111.83
16.18	957.31	1112.9		16.18	950.51	1112.9		16.18	944.76	1112.9		16.18	1001.86	1112.9
16.2	853.32	1113.97		16.2	982.66	1113.97		16.2	1009.66	1113.97		16.2	1009.86	1113.97
16.22	923.88	1115.04		16.22	939.43	1115.04		16.22	995.15	1115.04		16.22	976.17	1115.04
16.23	890.14	1116.11		16.23	897.43	1116.11		16.23	970.28	1116.11		16.23	884.6	1116.11
16.25	829.87	1117.18		16.25	958.31	1117.18		16.25	1056.66	1117.18		16.25	897.12	1117.18
16.27	950.57	1118.25		16.27	966.81	1118.25		16.27	1054.39	1118.25		16.27	1004.41	1118.25
16.28	967.22	1119.32		16.28	1034.02	1119.32		16.28	1125.31	1119.32		16.28	989.58	1119.32
16.3	931.13	1120.39		16.3	1055.69	1120.39		16.3	935.84	1120.39		16.3	968.4	1120.39
16.32	1008.57	1121.46		16.32	1059.15	1121.46		16.32	982.7	1121.46		16.32	968.45	1121.46
16.33	919.64	1122.53		16.33	1004.99	1122.53		16.33	966.64	1122.53		16.33	953.37	1122.53
16.35	924.82	1123.6		16.35	1027.01	1123.6		16.35	935.64	1123.6		16.35	951.57	1123.6
16.37	1029.19	1124.67		16.37	1011.91	1124.67		16.37	930.22	1124.67		16.37	1008.86	1124.67
16.38	988.88	1125.74		16.38	1054.78	1125.74		16.38	921.32	1125.74		16.38	1120.81	1125.74
16.4	1012.67	1126.81		16.4	1108.27	1126.81		16.4	955.19	1126.81		16.4	1169.56	1126.81
16.42	950.61	1127.88		16.42	1015.78	1127.88		16.42	1057.13	1127.88		16.42	1174.2	1127.88
16.43	996.28	1128.95		16.43	953.45	1128.95		16.43	1012	1128.95		16.43	1067.91	1128.95
16.45	1141.97	1130.02		16.45	933.48	1130.02		16.45	938.94	1130.02		16.45	1104.68	1130.02
16.47	879.81	1131.09		16.47	949.94	1131.09		16.47	1106.76	1131.09		16.47	1016.85	1131.09
16.48	891.51	1132.16		16.48	957.49	1132.16		16.48	1143.6	1132.16		16.48	1087.03	1132.16
16.5	1019.49	1133.23		16.5	1061.16	1133.23		16.5	1128.47	1133.23		16.5	895.23	1133.23
16.52	1026.56	1134.3		16.52	1056.64	1134.3		16.52	1074.42	1134.3		16.52	974.83	1134.3
16.53	1013.53	1135.37		16.53	992.61	1135.37		16.53	1101.36	1135.37		16.53	1034.71	1135.37
16.55	891.6	1136.44		16.55	1070.73	1136.44		16.55	1123.39	1136.44		16.55	896.16	1136.44
16.57	1071.67	1137.51		16.57	1044.21	1137.51		16.57	1070.92	1137.51		16.57	926.35	1137.51
16.58	946.02	1138.58		16.58	1128.79	1138.58		16.58	1126.04	1138.58		16.58	888.4	1138.58
16.6	1028.68	1139.65		16.6	1082.23	1139.65		16.6	1051.58	1139.65		16.6	888.33	1139.65
16.62	978.79	1140.71		16.62	1012.36	1140.71		16.62	1010.94	1140.71		16.62	994.15	1140.71
16.63	943.92	1141.78		16.63	1087.8	1141.78		16.63	1012.04	1141.78		16.63	1087.56	1141.78
16.65	1028.67	1142.85		16.65	1034.19	1142.85		16.65	948.14	1142.85		16.65	1082.66	1142.85
16.67	1019.65	1143.92		16.67	1032.87	1143.92		16.67	968.61	1143.92		16.67	1133.91	1143.92
16.68	928.29	1144.99		16.68	1088.94	1144.99		16.68	908.83	1144.99		16.68	976.03	1144.99
16.7	872.77	1146.06		16.7	1004.81	1146.06		16.7	945.27	1146.06		16.7	1002.5	1146.06
16.72	965.1	1147.13		16.72	936.32	1147.13		16.72	978.68	1147.13		16.72	997.66	1147.13
16.73	989.45	1148.2		16.73	1009.9	1148.2		16.73	953.24	1148.2		16.73	989.24	1148.2
16.75	1028.74	1149.27		16.75	1057.12	1149.27		16.75	1013.94	1149.27		16.75	912.48	1149.27
16.77	1024.05	1150.34		16.77	1036.38	1150.34		16.77	968.15	1150.34		16.77	949.47	1150.34
16.78	1030.65	1151.4		16.78	965.21	1151.4		16.78	913.25	1151.4		16.78	966.71	1151.4
16.8	996.17	1152.47		16.8	847.94	1152.47		16.8	905.99	1152.47		16.8	1045.32	1152.47
16.82	1024.89	1153.54		16.82	872.7	1153.54		16.82	940.29	1153.54		16.82	1040.81	1153.54
16.83	934.38	1154.61		16.83	955.87	1154.61		16.83	1046.06	1154.61		16.83	918.71	1154.61
16.85	981.59	1155.68		16.85	926.32	1155.68		16.85	1074.39	1155.68		16.85	1106.34	1155.68
16.87	953.02	1156.75		16.87	837.68	1156.75		16.87	1163.52	1156.75		16.87	987.36	1156.75
16.88	1045.95	1157.82		16.88	979.6	1157.82		16.88	1036.27	1157.82		16.88	997.76	1157.82
16.9	993.27	1158.89		16.9	930.44	1158.89		16.9	947.5	1158.89		16.9	1010.62	1158.89
16.92	1073.08	1159.95		16.92	1006.32	1159.95		16.92	1057.72	1159.95		16.92	954.39	1159.95
16.93	983.36	1161.02		16.93	932.56	1161.02		16.93	1033.68	1161.02		16.93	1020.52	1161.02
16.95	1063.72	1162.09		16.95	934.73	1162.09		16.95	925.61	1162.09		16.95	877.88	1162.09
16.97	962.78	1163.16		16.97	1068.85	1163.16		16.97	970.41	1163.16		16.97	930.39	1163.16
16.98	1048.34	1164.23		16.98	1091.99	1164.23		16.98	1034	1164.23		16.98	1133.86	1164.23
17	1039.13	1165.3		17	968.18	1165.3		17	1018.87	1165.3		17	1177.31	1165.3
17.02	856.97	1166.37		17.02	980.86	1166.37		17.02	1015.29	1166.37		17.02	1095.23	1166.37
17.03	914.12	1167.43		17.03	1033.4	1167.43		17.03	994.29	1167.43		17.03	1132.75	1167.43
17.05	934.24	1168.5		17.05	1051.74	1168.5		17.05	1004.75	1168.5		17.05	1018.29	1168.5
17.07	936.22	1169.57		17.07	902.29	1169.57		17.07	969.56	1169.57		17.07	1114.79	1169.57
17.08	932.54	1170.64		17.08	1055.89	1170.64		17.08	906.37	1170.64		17.08	1109.18	1170.64
17.1	995.14	1171.71		17.1	1028.85	1171.71		17.1	916.75	1171.71		17.1	954.65	1171.71
17.12	997.78	1172.77		17.12	1045.73	1172.77		17.12	992.53	1172.77		17.12	995.94	1172.77
17.13	999.77	1173.84		17.13	1013.76	1173.84		17.13	1006.81	1173.84		17.13	966.63	1173.84
17.15	1058.87	1174.91		17.15	1076.1	1174.91		17.15	1017.01	1174.91		17.15	958.64	1174.91
17.17	998.99	1175.98		17.17	1097.08	1175.98		17.17	1023.89	1175.98		17.17	881.81	1175.98
17.18	998.41	1177.05		17.18	1055.7	1177.05		17.18	1071.76	1177.05		17.18	980.09	1177.05
17.2	1049.1	1178.12		17.2	1039.14	1178.12		17.2	1012.9	1178.12		17.2	1041.9	1178.12
17.22	1051.55	1179.18		17.22	1041.24	1179.18		17.22	939.83	1179.18		17.22	1020.27	1179.18
17.23	1079.39	1180.25		17.23	992.27	1180.25		17.23	987.33	1180.25		17.23	1043.55	1180.25
17.25	1008.33	1181.32		17.25	1033.92	1181.32		17.25	1096.34	1181.32		17.25	1044.97	1181.32
17.27	1004.11	1182.39		17.27	1029.97	1182.39		17.27	1103.13	1182.39		17.27	1046.56	1182.39
17.28	914.84	1183.45		17.28	988.85	1183.45		17.28	1070.96	1183.45		17.28	996.21	1183.45
17.3	977.64	1184.52		17.3	1023.75	1184.52		17.3	975.12	1184.52		17.3	952.84	1184.52
17.32	1006.5	1185.59		17.32	953.78	1185.59		17.32	982.03	1185.59		17.32	1072.35	1185.59
17.33	1010.96	1186.66		17.33	1020.58	1186.66		17.33	1013.34	1186.66		17.33	994.13	1186.66
17.35	995.94	1187.73		17.35	1100.83	1187.73		17.35	1167.41	1187.73		17.35	1043.87	1187.73
17.37	994.37	1188.79		17.37	1080.98	1188.79		17.37	1067.78	1188.79		17.37	1119.22	1188.79
17.38	964.27	1189.86		17.38	1107.63	1189.86		17.38	979.81	1189.86		17.38	1021.97	1189.86
17.4	1044.64	1190.93		17.4	1113.8	1190.93		17.4	890.24	1190.93		17.4	1011.04	1190.93
17.42	1127.03	1192		17.42	1036.78	1192		17.42	1012.01	1192		17.42	950.98	1192
17.43	1020.13	1193.06		17.43	1186.82	1193.06		17.43	1108.62	1193.06		17.43	995.65	1193.06
17.45	1093.94	1194.13		17.45	1177.54	1194.13		17.45	1134.95	1194.13		17.45	1047.52	1194.13
17.47	1060.42	1195.2		17.47	1099.04	1195.2		17.47	1160.13	1195.2		17.47	1082.66	1195.2
17.48	1087.13	1196.27		17.48	1041.87	1196.27		17.48	1052.6	1196.27		17.48	1039.44	1196.27
17.5	1055.1	1197.33		17.5	1124.36	1197.33		17.5	980.13	1197.33		17.5	1030.89	1197.33
17.52	1063.38	1198.4		17.52	1050.86	1198.4		17.52	1115.29	1198.4		17.52	1085.57	1198.4
17.53	1050.53	1199.47		17.53	1062.82	1199.47		17.53	988.83	1199.47		17.53	1013.29	1199.47
17.55	1000.76	1200.54		17.55	1082.91	1200.54		17.55	1040.15	1200.54		17.55	1075.85	1200.54
17.57	1063.99	1201.6		17.57	1092.32	1201.6		17.57	1001.38	1201.6		17.57	1248.88	1201.6
17.58	1007.81	1202.67		17.58	1078.61	1202.67		17.58	1036.4	1202.67		17.58	1291.94	1202.67
17.6	970.36	1203.74		17.6	1052.08	1203.74		17.6	956.93	1203.74		17.6	1093.29	1203.74
17.62	1018.36	1204.8		17.62	1069.16	1204.8		17.62	1044.07	1204.8		17.62	1244.99	1204.8
17.63	1071.51	1205.87		17.63	1056.16	1205.87		17.63	1119.65	1205.87		17.63	1155.21	1205.87
17.65	1088.49	1206.94		17.65	1071.94	1206.94		17.65	953.04	1206.94		17.65	1015.08	1206.94
17.67	1001.83	1208.01		17.67	1085.24	1208.01		17.67	1096.41	1208.01		17.67	988.93	1208.01
17.68	1006.58	1209.07		17.68	1128.99	1209.07		17.68	1093.47	1209.07		17.68	885.44	1209.07
17.7	1009.36	1210.14		17.7	1077.22	1210.14		17.7	983.14	1210.14		17.7	1076.91	1210.14
17.72	1106.77	1211.21		17.72	1038.43	1211.21		17.72	1063.66	1211.21		17.72	1017.01	1211.21
17.73	1000.04	1212.27		17.73	1013.27	1212.27		17.73	1016.39	1212.27		17.73	1114.84	1212.27
17.75	1104.3	1213.34		17.75	1093.12	1213.34		17.75	1045.55	1213.34		17.75	1049.13	1213.34
17.77	1012.67	1214.41		17.77	1110.78	1214.41		17.77	1157.08	1214.41		17.77	1035.07	1214.41
17.78	1141.56	1215.48		17.78	1094.24	1215.48		17.78	1188.42	1215.48		17.78	1060.42	1215.48
17.8	1169.27	1216.54		17.8	1133.02	1216.54		17.8	1057.23	1216.54		17.8	990.38	1216.54
17.82	1073.59	1217.61		17.82	1144.07	1217.61		17.82	1057.15	1217.61		17.82	868.24	1217.61
17.83	1032.77	1218.68		17.83	1039.69	1218.68		17.83	991.1	1218.68		17.83	1022.89	1218.68
17.85	1040.14	1219.74		17.85	1165.51	1219.74		17.85	1001.92	1219.74		17.85	1042.68	1219.74
17.87	1098.25	1220.81		17.87	1161.02	1220.81		17.87	1063.85	1220.81		17.87	1060.08	1220.81
17.88	1150.87	1221.88		17.88	1130.52	1221.88		17.88	1189.13	1221.88		17.88	1151.03	1221.88
17.9	1076.02	1222.94		17.9	1084.29	1222.94		17.9	1187.97	1222.94		17.9	1130.95	1222.94
17.92	1147.41	1224.01		17.92	1148.96	1224.01		17.92	1165.67	1224.01		17.92	1012.39	1224.01
17.93	1195.93	1225.08		17.93	982.02	1225.08		17.93	1238.57	1225.08		17.93	903.48	1225.08
17.95	1199.72	1226.14		17.95	1113.81	1226.14		17.95	1162.21	1226.14		17.95	1013.32	1226.14
17.97	1012.41	1227.21		17.97	1189.13	1227.21		17.97	1132.09	1227.21		17.97	1117.97	1227.21
17.98	1195.87	1228.28		17.98	1154.49	1228.28		17.98	1163.41	1228.28		17.98	1124.87	1228.28
18	1119.66	1229.34		18	1082.01	1229.34		18	1021.45	1229.34		18	1084.83	1229.34
18.02	1116.35	1230.41		18.02	1058.47	1230.41		18.02	981.32	1230.41		18.02	1114.4	1230.41
18.03	1156.76	1231.47		18.03	1117.06	1231.47		18.03	1058.29	1231.47		18.03	1027.94	1231.47
18.05	1017.04	1232.54		18.05	1121.05	1232.54		18.05	1103.43	1232.54		18.05	1005.25	1232.54
18.07	1023.72	1233.61		18.07	1216.79	1233.61		18.07	1135.79	1233.61		18.07	1036.17	1233.61
18.08	1159.96	1234.67		18.08	1199.99	1234.67		18.08	973.78	1234.67		18.08	1029.44	1234.67
18.1	1068.22	1235.74		18.1	1088.26	1235.74		18.1	1029.33	1235.74		18.1	1065.78	1235.74
18.12	985.72	1236.81		18.12	1272.96	1236.81		18.12	1028.75	1236.81		18.12	1084.79	1236.81
18.13	1053.37	1237.87		18.13	1153.85	1237.87		18.13	1053.88	1237.87		18.13	985.95	1237.87
18.15	1168.19	1238.94		18.15	1127	1238.94		18.15	1054.81	1238.94		18.15	980.25	1238.94
18.17	1162	1240.01		18.17	1176.49	1240.01		18.17	1101.78	1240.01		18.17	1012.69	1240.01
18.18	1052.68	1241.07		18.18	1144.08	1241.07		18.18	1052.76	1241.07		18.18	1068.58	1241.07
18.2	964.1	1242.14		18.2	1097.63	1242.14		18.2	1125.28	1242.14		18.2	1042.49	1242.14
18.22	970.78	1243.2		18.22	1207.14	1243.2		18.22	1127.3	1243.2		18.22	1139.73	1243.2
18.23	1083.14	1244.27		18.23	1166.94	1244.27		18.23	1016.27	1244.27		18.23	1106.36	1244.27
18.25	1067.4	1245.34		18.25	1200.41	1245.34		18.25	1087.15	1245.34		18.25	1014.6	1245.34
18.27	1070.99	1246.4		18.27	1142.52	1246.4		18.27	999.3	1246.4		18.27	1070.77	1246.4
18.28	1014.5	1247.47		18.28	1073.32	1247.47		18.28	1039.5	1247.47		18.28	992.45	1247.47
18.3	1041.29	1248.53		18.3	1014.5	1248.53		18.3	1004.18	1248.53		18.3	1077.11	1248.53
18.32	1041.09	1249.6		18.32	1082.74	1249.6		18.32	1077.63	1249.6		18.32	996.92	1249.6
18.33	1138.8	1250.67		18.33	1092.87	1250.67		18.33	1170.26	1250.67		18.33	1029.98	1250.67
18.35	1091.39	1251.73		18.35	1087.94	1251.73		18.35	1148.48	1251.73		18.35	1137.2	1251.73
18.37	1119.77	1252.8		18.37	1078.03	1252.8		18.37	1165.37	1252.8		18.37	1114.01	1252.8
18.38	1066.92	1253.86		18.38	1083.7	1253.86		18.38	1081.86	1253.86		18.38	970.35	1253.86
18.4	1066.26	1254.93		18.4	1091	1254.93		18.4	1085.24	1254.93		18.4	1084.38	1254.93
18.42	1199.7	1255.99		18.42	1161.14	1255.99		18.42	1090.4	1255.99		18.42	1003.53	1255.99
18.43	1159.77	1257.06		18.43	1136.72	1257.06		18.43	1094.93	1257.06		18.43	1217.68	1257.06
18.45	1218.28	1258.13		18.45	1031.62	1258.13		18.45	1119.57	1258.13		18.45	1256.38	1258.13
18.47	1133.01	1259.19		18.47	1214.08	1259.19		18.47	1054.43	1259.19		18.47	1258.29	1259.19
18.48	1192.48	1260.26		18.48	1194.55	1260.26		18.48	1022.9	1260.26		18.48	1303.12	1260.26
18.5	1043.89	1261.32		18.5	1146.08	1261.32		18.5	1010.55	1261.32		18.5	1184.05	1261.32
18.52	1178.19	1262.39		18.52	1127.89	1262.39		18.52	1132.14	1262.39		18.52	1119.16	1262.39
18.53	1044.87	1263.45		18.53	1249.63	1263.45		18.53	1000.19	1263.45		18.53	1136.56	1263.45
18.55	1156.99	1264.52		18.55	1081.28	1264.52		18.55	1035.21	1264.52		18.55	1150.78	1264.52
18.57	1121.53	1265.58		18.57	1156.67	1265.58		18.57	1030.63	1265.58		18.57	1078.64	1265.58
18.58	1153.35	1266.65		18.58	1232.1	1266.65		18.58	975.51	1266.65		18.58	1194.35	1266.65
18.6	1085.13	1267.72		18.6	1198.06	1267.72		18.6	1159.91	1267.72		18.6	1113.43	1267.72
18.62	1023.6	1268.78		18.62	1057.98	1268.78		18.62	1124.7	1268.78		18.62	1157.63	1268.78
18.63	1064.91	1269.85		18.63	1079.75	1269.85		18.63	1058.03	1269.85		18.63	1190.62	1269.85
18.65	1098.98	1270.91		18.65	1061.28	1270.91		18.65	1118.55	1270.91		18.65	1152.67	1270.91
18.67	1036.08	1271.98		18.67	1060.63	1271.98		18.67	1094.21	1271.98		18.67	1101.4	1271.98
18.68	1049.75	1273.04		18.68	1122.15	1273.04		18.68	1179.35	1273.04		18.68	1155.16	1273.04
18.7	1041.02	1274.11		18.7	1036.29	1274.11		18.7	1021.33	1274.11		18.7	1135.4	1274.11
18.72	1093.29	1275.17		18.72	1140.69	1275.17		18.72	1125.65	1275.17		18.72	1346.14	1275.17
18.73	1042.62	1276.24		18.73	1067.2	1276.24		18.73	1131.73	1276.24		18.73	1444.14	1276.24
18.75	1133.86	1277.3		18.75	1123.58	1277.3		18.75	1116.95	1277.3		18.75	1320.66	1277.3
18.77	965.7	1278.37		18.77	1060.17	1278.37		18.77	1037.47	1278.37		18.77	1290.18	1278.37
18.78	1160.22	1279.43		18.78	1203.87	1279.43		18.78	1164.23	1279.43		18.78	1164.46	1279.43
18.8	1212.53	1280.5		18.8	1091.1	1280.5		18.8	1056.25	1280.5		18.8	1253.12	1280.5
18.82	1115.77	1281.56		18.82	1136.96	1281.56		18.82	1073.82	1281.56		18.82	1157.33	1281.56
18.83	1098.54	1282.63		18.83	1139.43	1282.63		18.83	1085.05	1282.63		18.83	1140.88	1282.63
18.85	1174.01	1283.69		18.85	1202.86	1283.69		18.85	1063.99	1283.69		18.85	1055.24	1283.69
18.87	1113.11	1284.76		18.87	1277.96	1284.76		18.87	1085.53	1284.76		18.87	1148.23	1284.76
18.88	1113.17	1285.82		18.88	1351.47	1285.82		18.88	1135.47	1285.82		18.88	1057.21	1285.82
18.9	1085.75	1286.89		18.9	1267.62	1286.89		18.9	1182.37	1286.89		18.9	1124.22	1286.89
18.92	1053.12	1287.95		18.92	1224.94	1287.95		18.92	1283.54	1287.95		18.92	1066.52	1287.95
18.93	1068.06	1289.02		18.93	1158.51	1289.02		18.93	1185.05	1289.02		18.93	1117.11	1289.02
18.95	1080.87	1290.08		18.95	1227.75	1290.08		18.95	1285.26	1290.08		18.95	1015.4	1290.08
18.97	1097.88	1291.15		18.97	1107.04	1291.15		18.97	1291.82	1291.15		18.97	1021.43	1291.15
18.98	1142.97	1292.21		18.98	1159.51	1292.21		18.98	1163.82	1292.21		18.98	1073.77	1292.21
19	1081.8	1293.28		19	1137.24	1293.28		19	1071.74	1293.28		19	1122.23	1293.28
19.02	1057.74	1294.34		19.02	1068.75	1294.34		19.02	1094.12	1294.34		19.02	1165.48	1294.34
19.03	1128.26	1295.41		19.03	1039.44	1295.41		19.03	1163.27	1295.41		19.03	1193.97	1295.41
19.05	1136.63	1296.47		19.05	1101.61	1296.47		19.05	1140.1	1296.47		19.05	1121.9	1296.47
19.07	1066.68	1297.53		19.07	1238.43	1297.53		19.07	1070.77	1297.53		19.07	1048.21	1297.53
19.08	1073.22	1298.6		19.08	1272.15	1298.6		19.08	1136.76	1298.6		19.08	1175.06	1298.6
19.1	1020.34	1299.66		19.1	1224.21	1299.66		19.1	1181.72	1299.66		19.1	1104.22	1299.66
19.12	1063.02	1300.73		19.12	1105.15	1300.73		19.12	1150.65	1300.73		19.12	1215.98	1300.73
19.13	1182.68	1301.79		19.13	1147.64	1301.79		19.13	1118.3	1301.79		19.13	1236.86	1301.79
19.15	1251.86	1302.86		19.15	1117.88	1302.86		19.15	1099.94	1302.86		19.15	1126.22	1302.86
19.17	1274.45	1303.92		19.17	1111.39	1303.92		19.17	1125.25	1303.92		19.17	1118.99	1303.92
19.18	1053.56	1304.99		19.18	1179.54	1304.99		19.18	1271.94	1304.99		19.18	1037.34	1304.99
19.2	1175.3	1306.05		19.2	1170.06	1306.05		19.2	1190.68	1306.05		19.2	1078.92	1306.05
19.22	1103.17	1307.12		19.22	1120.39	1307.12		19.22	1222.01	1307.12		19.22	1112.95	1307.12
19.23	1119.87	1308.18		19.23	1022.6	1308.18		19.23	1244.85	1308.18		19.23	1199.56	1308.18
19.25	1138.97	1309.24		19.25	1174.76	1309.24		19.25	1204.97	1309.24		19.25	1179.48	1309.24
19.27	1161.71	1310.31		19.27	1156.59	1310.31		19.27	1227.16	1310.31		19.27	1235.1	1310.31
19.28	1195.72	1311.37		19.28	1139.69	1311.37		19.28	1198.85	1311.37		19.28	1208.07	1311.37
19.3	1201.27	1312.44		19.3	1097.83	1312.44		19.3	1148.53	1312.44		19.3	1187.74	1312.44
19.32	1105.22	1313.5		19.32	1094.29	1313.5		19.32	1170.69	1313.5		19.32	1144.53	1313.5
19.33	1195.13	1314.56		19.33	1117.38	1314.56		19.33	1177.81	1314.56		19.33	1210.01	1314.56
19.35	1151.24	1315.63		19.35	1145.53	1315.63		19.35	1100.11	1315.63		19.35	1190.39	1315.63
19.37	1185.96	1316.69		19.37	1085.6	1316.69		19.37	1212.29	1316.69		19.37	1226.82	1316.69
19.38	1111.79	1317.76		19.38	1084.94	1317.76		19.38	1124.07	1317.76		19.38	1069.72	1317.76
19.4	1183.67	1318.82		19.4	1098.49	1318.82		19.4	1156.06	1318.82		19.4	1008	1318.82
19.42	1165.26	1319.89		19.42	1207.25	1319.89		19.42	1103.29	1319.89		19.42	1176.6	1319.89
19.43	1082.97	1320.95		19.43	1074.72	1320.95		19.43	1197.17	1320.95		19.43	1116.46	1320.95
19.45	1146.48	1322.01		19.45	1216.38	1322.01		19.45	1173.87	1322.01		19.45	1125.84	1322.01
19.47	1057.71	1323.08		19.47	1147.28	1323.08		19.47	1064.25	1323.08		19.47	1301.39	1323.08
19.48	1125.66	1324.14		19.48	1065.46	1324.14		19.48	1119.21	1324.14		19.48	1181.06	1324.14
19.5	1058.61	1325.2		19.5	1093.35	1325.2		19.5	1055.59	1325.2		19.5	1252.51	1325.2
19.52	1168.13	1326.27		19.52	1227.42	1326.27		19.52	1137.58	1326.27		19.52	1217.5	1326.27
19.53	1164.56	1327.33		19.53	1276.41	1327.33		19.53	1214.33	1327.33		19.53	1259.69	1327.33
19.55	1189.21	1328.4		19.55	1221.21	1328.4		19.55	1211.29	1328.4		19.55	1216.06	1328.4
19.57	1176.56	1329.46		19.57	1230.81	1329.46		19.57	1208	1329.46		19.57	1093.47	1329.46
19.58	1149.32	1330.52		19.58	1217.46	1330.52		19.58	1204.73	1330.52		19.58	1125.11	1330.52
19.6	1089.17	1331.59		19.6	1201.56	1331.59		19.6	1242.14	1331.59		19.6	1205.31	1331.59
19.62	1125.25	1332.65		19.62	1268.21	1332.65		19.62	1112.4	1332.65		19.62	1243.88	1332.65
19.63	1088.28	1333.71		19.63	1198.26	1333.71		19.63	1186.85	1333.71		19.63	1221.95	1333.71
19.65	1212.96	1334.78		19.65	1142.96	1334.78		19.65	1222.43	1334.78		19.65	1212.52	1334.78
19.67	1290.54	1335.84		19.67	1271.44	1335.84		19.67	1147.17	1335.84		19.67	1277.76	1335.84
19.68	1257.31	1336.91		19.68	1233.39	1336.91		19.68	1154.45	1336.91		19.68	1268.86	1336.91
19.7	1213.12	1337.97		19.7	1173.19	1337.97		19.7	1159.66	1337.97		19.7	1260.49	1337.97
19.72	1151.24	1339.03		19.72	1171.6	1339.03		19.72	1182.99	1339.03		19.72	1177.22	1339.03
19.73	1206.22	1340.1		19.73	1142.89	1340.1		19.73	1244.66	1340.1		19.73	1215.42	1340.1
19.75	1186.45	1341.16		19.75	1243.16	1341.16		19.75	1332.71	1341.16		19.75	1120.81	1341.16
19.77	1260.78	1342.22		19.77	1178.94	1342.22		19.77	1217.81	1342.22		19.77	1169.36	1342.22
19.78	1343.16	1343.29		19.78	1125.97	1343.29		19.78	1152.8	1343.29		19.78	1183.5	1343.29
19.8	1248.85	1344.35		19.8	1109.93	1344.35		19.8	1149.08	1344.35		19.8	1147.29	1344.35
19.82	1335.21	1345.41		19.82	1167.02	1345.41		19.82	1223.02	1345.41		19.82	1247.31	1345.41
19.83	1197.63	1346.48		19.83	1228.87	1346.48		19.83	1120.42	1346.48		19.83	1287.81	1346.48
19.85	1165.45	1347.54		19.85	1307.81	1347.54		19.85	1198.69	1347.54		19.85	1193.62	1347.54
19.87	1058.18	1348.6		19.87	1145.23	1348.6		19.87	1282.27	1348.6		19.87	1104.42	1348.6
19.88	1131.61	1349.67		19.88	1265.43	1349.67		19.88	1205.79	1349.67		19.88	1236.63	1349.67
19.9	1212.09	1350.73		19.9	1287.06	1350.73		19.9	1206.63	1350.73		19.9	1189.74	1350.73
19.92	1230.27	1351.79		19.92	1213.73	1351.79		19.92	1144.24	1351.79		19.92	1227.99	1351.79
19.93	1176.9	1352.86		19.93	1202.86	1352.86		19.93	1162.35	1352.86		19.93	1154.38	1352.86
19.95	1072.29	1353.92		19.95	1219.73	1353.92		19.95	1170.71	1353.92		19.95	1099.24	1353.92
19.97	1188.88	1354.98		19.97	1298.66	1354.98		19.97	1251.78	1354.98		19.97	1232.34	1354.98
19.98	1191.81	1356.05		19.98	1221.98	1356.05		19.98	1145.88	1356.05		19.98	1256.71	1356.05
20	1155.99	1357.11		20	1209.52	1357.11		20	1130.39	1357.11		20	1286.59	1357.11
20.02	1094.25	1358.17		20.02	1291.18	1358.17		20.02	1145.01	1358.17		20.02	1141.42	1358.17
20.03	1141.72	1359.23		20.03	1321.07	1359.23		20.03	1344.67	1359.23		20.03	1110.69	1359.23
20.05	1156.84	1360.3		20.05	1240.51	1360.3		20.05	1231.69	1360.3		20.05	1170.21	1360.3
20.07	1107.53	1361.36		20.07	1267.89	1361.36		20.07	1262.61	1361.36		20.07	1205.63	1361.36
20.08	1195.2	1362.42		20.08	1238.71	1362.42		20.08	1190.51	1362.42		20.08	1173.13	1362.42
20.1	1321.96	1363.49		20.1	1212.87	1363.49		20.1	1259.66	1363.49		20.1	1326.7	1363.49
20.12	1213.55	1364.55		20.12	1399.4	1364.55		20.12	1176.22	1364.55		20.12	1345.41	1364.55
20.13	1216.64	1365.61		20.13	1260.97	1365.61		20.13	1211.26	1365.61		20.13	1302.18	1365.61
20.15	1282.06	1366.67		20.15	1393.93	1366.67		20.15	1286.33	1366.67		20.15	1173.54	1366.67
20.17	1216.46	1367.74		20.17	1288.8	1367.74		20.17	1243.08	1367.74		20.17	1145.35	1367.74
20.18	1188.91	1368.8		20.18	1269.71	1368.8		20.18	1209.21	1368.8		20.18	1070.69	1368.8
20.2	1131.19	1369.86		20.2	1222.42	1369.86		20.2	1209.03	1369.86		20.2	1147.89	1369.86
20.22	1132.57	1370.93		20.22	1102.11	1370.93		20.22	1167.67	1370.93		20.22	1114.01	1370.93
20.23	1268.69	1371.99		20.23	1141.83	1371.99		20.23	1312.12	1371.99		20.23	1118.67	1371.99
20.25	1244.44	1373.05		20.25	1156.02	1373.05		20.25	1264.26	1373.05		20.25	1206.17	1373.05
20.27	1159.33	1374.11		20.27	1214.66	1374.11		20.27	1242.3	1374.11		20.27	1191.05	1374.11
20.28	1291.73	1375.18		20.28	1187.99	1375.18		20.28	1175.61	1375.18		20.28	1201.75	1375.18
20.3	1253.59	1376.24		20.3	1191.9	1376.24		20.3	1201.87	1376.24		20.3	1184.03	1376.24
20.32	1230.56	1377.3		20.32	1119	1377.3		20.32	1226.17	1377.3		20.32	1218.95	1377.3
20.33	1214.29	1378.36		20.33	1239.26	1378.36		20.33	1189.29	1378.36		20.33	1239.1	1378.36
20.35	1244.55	1379.43		20.35	1243.45	1379.43		20.35	1135.16	1379.43		20.35	1199.53	1379.43
20.37	1231.89	1380.49		20.37	1241.36	1380.49		20.37	1210.82	1380.49		20.37	1172.04	1380.49
20.38	1214.85	1381.55		20.38	1264.68	1381.55		20.38	1218.9	1381.55		20.38	1211.33	1381.55
20.4	1211.13	1382.61		20.4	1183.54	1382.61		20.4	1271.13	1382.61		20.4	1232.82	1382.61
20.42	1086.51	1383.68		20.42	1153.03	1383.68		20.42	1316.77	1383.68		20.42	1107.14	1383.68
20.43	1230.07	1384.74		20.43	1198.02	1384.74		20.43	1286.96	1384.74		20.43	1196.42	1384.74
20.45	1210.43	1385.8		20.45	1226.12	1385.8		20.45	1299.91	1385.8		20.45	1100.24	1385.8
20.47	1228.4	1386.86		20.47	1135.72	1386.86		20.47	1308.7	1386.86		20.47	1179.12	1386.86
20.48	1309.86	1387.93		20.48	1195.72	1387.93		20.48	1292.91	1387.93		20.48	1362.64	1387.93
20.5	1332.49	1388.99		20.5	1204.93	1388.99		20.5	1224.72	1388.99		20.5	1300.66	1388.99
20.52	1230.41	1390.05		20.52	1176.12	1390.05		20.52	1249.78	1390.05		20.52	1265.51	1390.05
20.53	1220.52	1391.11		20.53	1234.27	1391.11		20.53	1255.41	1391.11		20.53	1287.71	1391.11
20.55	1222.32	1392.18		20.55	1192.11	1392.18		20.55	1257.8	1392.18		20.55	1266.3	1392.18
20.57	1234.25	1393.24		20.57	1250.05	1393.24		20.57	1209.66	1393.24		20.57	1177.73	1393.24
20.58	1213.24	1394.3		20.58	1283.86	1394.3		20.58	1173.73	1394.3		20.58	1068.4	1394.3
20.6	1299.77	1395.36		20.6	1367.38	1395.36		20.6	1194.77	1395.36		20.6	1167.27	1395.36
20.62	1257.44	1396.42		20.62	1251.66	1396.42		20.62	1236.3	1396.42		20.62	1101.18	1396.42
20.63	1198.92	1397.49		20.63	1269.78	1397.49		20.63	1209.4	1397.49		20.63	1104.54	1397.49
20.65	1047.22	1398.55		20.65	1244.32	1398.55		20.65	1241.72	1398.55		20.65	1234.87	1398.55
20.67	1205.8	1399.61		20.67	1223.77	1399.61		20.67	1290.37	1399.61		20.67	1135.83	1399.61
20.68	1160.95	1400.67		20.68	1298.09	1400.67		20.68	1337.49	1400.67		20.68	1121.48	1400.67
20.7	1145.48	1401.73		20.7	1237.32	1401.73		20.7	1244.46	1401.73		20.7	1103.1	1401.73
20.72	1258.43	1402.8		20.72	1231.1	1402.8		20.72	1178.67	1402.8		20.72	1090.66	1402.8
20.73	1198.2	1403.86		20.73	1147.06	1403.86		20.73	1105.7	1403.86		20.73	1165.77	1403.86
20.75	1266.71	1404.92		20.75	1168.44	1404.92		20.75	1190.83	1404.92		20.75	1179.03	1404.92
20.77	1311.75	1405.98		20.77	1235.45	1405.98		20.77	1286.78	1405.98		20.77	1233.72	1405.98
20.78	1290.3	1407.04		20.78	1283.07	1407.04		20.78	1192.98	1407.04		20.78	1237.12	1407.04
20.8	1217.06	1408.11		20.8	1299.16	1408.11		20.8	1179.79	1408.11		20.8	1331.96	1408.11
20.82	1144.23	1409.17		20.82	1200.64	1409.17		20.82	1221.58	1409.17		20.82	1312.01	1409.17
20.83	1254.37	1410.23		20.83	1152.47	1410.23		20.83	1269.7	1410.23		20.83	1297.95	1410.23
20.85	1196.91	1411.29		20.85	1109.39	1411.29		20.85	1241.9	1411.29		20.85	1235.88	1411.29
20.87	1332.32	1412.35		20.87	1165.78	1412.35		20.87	1244.11	1412.35		20.87	1250.59	1412.35
20.88	1190	1413.41		20.88	1131.59	1413.41		20.88	1253.66	1413.41		20.88	1303.35	1413.41
20.9	1252.85	1414.48		20.9	1150.46	1414.48		20.9	1328.12	1414.48		20.9	1226.87	1414.48
20.92	1254.34	1415.54		20.92	1163.75	1415.54		20.92	1339.91	1415.54		20.92	1335.82	1415.54
20.93	1254.85	1416.6		20.93	1140.93	1416.6		20.93	1361.04	1416.6		20.93	1267.51	1416.6
20.95	1144.51	1417.66		20.95	1283.52	1417.66		20.95	1314.68	1417.66		20.95	1330.65	1417.66
20.97	1123.79	1418.72		20.97	1360.44	1418.72		20.97	1286.21	1418.72		20.97	1241.18	1418.72
20.98	1202.29	1419.78		20.98	1332.98	1419.78		20.98	1400.2	1419.78		20.98	1257.84	1419.78
21	1089.03	1420.85		21	1330.65	1420.85		21	1185.3	1420.85		21	1255.84	1420.85
21.02	1233	1421.91		21.02	1269.17	1421.91		21.02	1226.14	1421.91		21.02	1256.11	1421.91
21.03	1120.8	1422.97		21.03	1352.21	1422.97		21.03	1168.3	1422.97		21.03	1230.91	1422.97
21.05	1148.89	1424.03		21.05	1369.3	1424.03		21.05	1169.97	1424.03		21.05	1308.83	1424.03
21.07	1209.22	1425.09		21.07	1382.51	1425.09		21.07	1199.73	1425.09		21.07	1404.6	1425.09
21.08	1180.97	1426.15		21.08	1460.52	1426.15		21.08	1234.42	1426.15		21.08	1460.69	1426.15
21.1	1285.48	1427.21		21.1	1396.65	1427.21		21.1	1285.95	1427.21		21.1	1413.94	1427.21
21.12	1215.47	1428.28		21.12	1451.83	1428.28		21.12	1267.42	1428.28		21.12	1382.97	1428.28
21.13	1182.03	1429.34		21.13	1467.37	1429.34		21.13	1214.21	1429.34		21.13	1381.39	1429.34
21.15	1379	1430.4		21.15	1350.43	1430.4		21.15	1207.47	1430.4		21.15	1381.57	1430.4
21.17	1317.59	1431.46		21.17	1423.53	1431.46		21.17	1271.48	1431.46		21.17	1383.92	1431.46
21.18	1205.99	1432.52		21.18	1404.39	1432.52		21.18	1242.36	1432.52		21.18	1212.27	1432.52
21.2	1261.44	1433.58		21.2	1447.97	1433.58		21.2	1237.88	1433.58		21.2	1262.95	1433.58
21.22	1175.95	1434.64		21.22	1557.11	1434.64		21.22	1338.52	1434.64		21.22	1359.09	1434.64
21.23	1387.99	1435.71		21.23	1492.05	1435.71		21.23	1285	1435.71		21.23	1516.49	1435.71
21.25	1338.7	1436.77		21.25	1466.89	1436.77		21.25	1331.07	1436.77		21.25	1402.25	1436.77
21.27	1266.03	1437.83		21.27	1542.09	1437.83		21.27	1439.62	1437.83		21.27	1226.41	1437.83
21.28	1303.42	1438.89		21.28	1455.55	1438.89		21.28	1336.61	1438.89		21.28	1277.59	1438.89
21.3	1399.93	1439.95		21.3	1433.18	1439.95		21.3	1356.93	1439.95		21.3	1299.18	1439.95
21.32	1350.66	1441.01		21.32	1344.68	1441.01		21.32	1399.48	1441.01		21.32	1185.86	1441.01
21.33	1258.49	1442.07		21.33	1193.02	1442.07		21.33	1312.26	1442.07		21.33	1230.89	1442.07
21.35	1306.34	1443.13		21.35	1295.78	1443.13		21.35	1175.36	1443.13		21.35	1453.91	1443.13
21.37	1244.74	1444.19		21.37	1270.74	1444.19		21.37	1185.63	1444.19		21.37	1461.53	1444.19
21.38	1162.24	1445.26		21.38	1303.29	1445.26		21.38	1280.46	1445.26		21.38	1474.34	1445.26
21.4	1261.24	1446.32		21.4	1245.59	1446.32		21.4	1243.15	1446.32		21.4	1414.09	1446.32
21.42	1232.91	1447.38		21.42	1313.47	1447.38		21.42	1187.91	1447.38		21.42	1352.08	1447.38
21.43	1274.86	1448.44		21.43	1264.72	1448.44		21.43	1264.22	1448.44		21.43	1257.79	1448.44
21.45	1222.91	1449.5		21.45	1235.48	1449.5		21.45	1348.66	1449.5		21.45	1239.25	1449.5
21.47	1293.13	1450.56		21.47	1269.57	1450.56		21.47	1240.93	1450.56		21.47	1268.4	1450.56
21.48	1290.75	1451.62		21.48	1186.32	1451.62		21.48	1244.1	1451.62		21.48	1238.21	1451.62
21.5	1309.21	1452.68		21.5	1187.18	1452.68		21.5	1263.98	1452.68		21.5	1311.31	1452.68
21.52	1336.9	1453.74		21.52	1211.33	1453.74		21.52	1334.02	1453.74		21.52	1274.67	1453.74
21.53	1250.76	1454.8		21.53	1244	1454.8		21.53	1265.49	1454.8		21.53	1315.72	1454.8
21.55	1177.04	1455.86		21.55	1236.85	1455.86		21.55	1313.32	1455.86		21.55	1342.09	1455.86
21.57	1251.58	1456.92		21.57	1226.89	1456.92		21.57	1355.51	1456.92		21.57	1209.78	1456.92
21.58	1157.5	1457.99		21.58	1258.48	1457.99		21.58	1303.01	1457.99		21.58	1224.13	1457.99
21.6	1285.2	1459.05		21.6	1298.69	1459.05		21.6	1279.24	1459.05		21.6	1259.38	1459.05
21.62	1165.73	1460.11		21.62	1209.84	1460.11		21.62	1262.22	1460.11		21.62	1238.71	1460.11
21.63	1234.4	1461.17		21.63	1295.56	1461.17		21.63	1217.22	1461.17		21.63	1237.14	1461.17
21.65	1327.05	1462.23		21.65	1240.78	1462.23		21.65	1183.41	1462.23		21.65	1201.6	1462.23
21.67	1231.17	1463.29		21.67	1215.19	1463.29		21.67	1388.93	1463.29		21.67	1253.85	1463.29
21.68	1263.42	1464.35		21.68	1324.8	1464.35		21.68	1431.95	1464.35		21.68	1311.37	1464.35
21.7	1391.88	1465.41		21.7	1285.31	1465.41		21.7	1488.31	1465.41		21.7	1311.09	1465.41
21.72	1292.42	1466.47		21.72	1254.37	1466.47		21.72	1385.26	1466.47		21.72	1204.84	1466.47
21.73	1167.46	1467.53		21.73	1240.56	1467.53		21.73	1407.79	1467.53		21.73	1275.07	1467.53
21.75	1356.72	1468.59		21.75	1292.85	1468.59		21.75	1293	1468.59		21.75	1246.22	1468.59
21.77	1308.16	1469.65		21.77	1326.59	1469.65		21.77	1257.33	1469.65		21.77	1239.28	1469.65
21.78	1244.22	1470.71		21.78	1290.85	1470.71		21.78	1279.17	1470.71		21.78	1306.77	1470.71
21.8	1248.72	1471.77		21.8	1190.41	1471.77		21.8	1185.54	1471.77		21.8	1195.68	1471.77
21.82	1156.19	1472.83		21.82	1167.13	1472.83		21.82	1210.81	1472.83		21.82	1265.78	1472.83
21.83	1187.38	1473.89		21.83	1251.87	1473.89		21.83	1171.43	1473.89		21.83	1231.9	1473.89
21.85	1317.38	1474.95		21.85	1287.49	1474.95		21.85	1146.66	1474.95		21.85	1342.91	1474.95
21.87	1172.6	1476.01		21.87	1344.23	1476.01		21.87	1232.55	1476.01		21.87	1423.47	1476.01
21.88	1256.1	1477.07		21.88	1383.67	1477.07		21.88	1276.65	1477.07		21.88	1255.34	1477.07
21.9	1340.82	1478.13		21.9	1302.92	1478.13		21.9	1264.53	1478.13		21.9	1222.03	1478.13
21.92	1345.24	1479.19		21.92	1290.87	1479.19		21.92	1181.9	1479.19		21.92	1283.15	1479.19
21.93	1318.18	1480.25		21.93	1219.31	1480.25		21.93	1244.82	1480.25		21.93	1302.95	1480.25
21.95	1251.66	1481.32		21.95	1290.64	1481.32		21.95	1430.97	1481.32		21.95	1281.53	1481.32
21.97	1181.56	1482.38		21.97	1385.29	1482.38		21.97	1339.19	1482.38		21.97	1299.66	1482.38
21.98	1209.2	1483.44		21.98	1326.56	1483.44		21.98	1365.14	1483.44		21.98	1327.94	1483.44
22	1320.63	1484.5		22	1329.32	1484.5		22	1299.47	1484.5		22	1268.56	1484.5
22.02	1353.54	1485.56		22.02	1357.24	1485.56		22.02	1313.59	1485.56		22.02	1421.82	1485.56
22.03	1215.74	1486.62		22.03	1246.49	1486.62		22.03	1332.12	1486.62		22.03	1352.3	1486.62
22.05	1236.14	1487.68		22.05	1324.23	1487.68		22.05	1274.91	1487.68		22.05	1370.62	1487.68
22.07	1247.28	1488.74		22.07	1314.12	1488.74		22.07	1293.8	1488.74		22.07	1181.76	1488.74
22.08	1295.55	1489.8		22.08	1358.21	1489.8		22.08	1344.05	1489.8		22.08	1245.56	1489.8
22.1	1361.02	1490.86		22.1	1447.43	1490.86		22.1	1405.88	1490.86		22.1	1307.56	1490.86
22.12	1331.41	1491.92		22.12	1404.76	1491.92		22.12	1432.55	1491.92		22.12	1347.21	1491.92
22.13	1468.82	1492.98		22.13	1364.72	1492.98		22.13	1247.12	1492.98		22.13	1449.04	1492.98
22.15	1362.82	1494.04		22.15	1354.71	1494.04		22.15	1415.73	1494.04		22.15	1416.82	1494.04
22.17	1259.71	1495.1		22.17	1262.93	1495.1		22.17	1367.03	1495.1		22.17	1299.93	1495.1
22.18	1387.74	1496.16		22.18	1419.04	1496.16		22.18	1272.48	1496.16		22.18	1192.17	1496.16
22.2	1216.73	1497.22		22.2	1368.02	1497.22		22.2	1352.67	1497.22		22.2	1287.72	1497.22
22.22	1324.72	1498.28		22.22	1265.16	1498.28		22.22	1380.85	1498.28		22.22	1323.86	1498.28
22.23	1316.87	1499.34		22.23	1310.66	1499.34		22.23	1309.44	1499.34		22.23	1346.23	1499.34
22.25	1288.09	1500.39		22.25	1284.64	1500.39		22.25	1245.19	1500.39		22.25	1259.97	1500.39
22.27	1186.74	1501.45		22.27	1328.45	1501.45		22.27	1364.1	1501.45		22.27	1292.75	1501.45
22.28	1264.01	1502.51		22.28	1327.28	1502.51		22.28	1285.84	1502.51		22.28	1265.08	1502.51
22.3	1389.58	1503.57		22.3	1342.56	1503.57		22.3	1243.35	1503.57		22.3	1377.59	1503.57
22.32	1248.34	1504.63		22.32	1434.55	1504.63		22.32	1277.4	1504.63		22.32	1274.09	1504.63
22.33	1369.45	1505.69		22.33	1433.26	1505.69		22.33	1275.43	1505.69		22.33	1244.42	1505.69
22.35	1365.27	1506.75		22.35	1400.51	1506.75		22.35	1243.98	1506.75		22.35	1236.97	1506.75
22.37	1386.2	1507.81		22.37	1417.18	1507.81		22.37	1283.69	1507.81		22.37	1222.52	1507.81
22.38	1317.96	1508.87		22.38	1445.68	1508.87		22.38	1365.7	1508.87		22.38	1154.27	1508.87
22.4	1306.28	1509.93		22.4	1348.3	1509.93		22.4	1279.41	1509.93		22.4	1253.03	1509.93
22.42	1323.15	1510.99		22.42	1436.73	1510.99		22.42	1302.2	1510.99		22.42	1218.49	1510.99
22.43	1282.62	1512.05		22.43	1476.01	1512.05		22.43	1232.82	1512.05		22.43	1211.84	1512.05
22.45	1362.29	1513.11		22.45	1410.41	1513.11		22.45	1355.08	1513.11		22.45	1254.66	1513.11
22.47	1346.97	1514.17		22.47	1427.94	1514.17		22.47	1261.98	1514.17		22.47	1398.16	1514.17
22.48	1481.92	1515.23		22.48	1464.13	1515.23		22.48	1238.69	1515.23		22.48	1435.92	1515.23
22.5	1330.03	1516.29		22.5	1453.68	1516.29		22.5	1259.35	1516.29		22.5	1515.72	1516.29
22.52	1257.49	1517.35		22.52	1407.96	1517.35		22.52	1245.96	1517.35		22.52	1449.34	1517.35
22.53	1389.4	1518.41		22.53	1379.47	1518.41		22.53	1366.8	1518.41		22.53	1347.63	1518.41
22.55	1431.89	1519.47		22.55	1461.9	1519.47		22.55	1441.59	1519.47		22.55	1358.69	1519.47
22.57	1295.29	1520.53		22.57	1439.02	1520.53		22.57	1314.23	1520.53		22.57	1293.82	1520.53
22.58	1303.53	1521.59		22.58	1390.1	1521.59		22.58	1367.34	1521.59		22.58	1304.06	1521.59
22.6	1346.77	1522.65		22.6	1373.8	1522.65		22.6	1289.33	1522.65		22.6	1351.77	1522.65
22.62	1328.79	1523.7		22.62	1387.43	1523.7		22.62	1146.48	1523.7		22.62	1290.48	1523.7
22.63	1283.17	1524.76		22.63	1440.74	1524.76		22.63	1294.34	1524.76		22.63	1327.04	1524.76
22.65	1308.09	1525.82		22.65	1397.71	1525.82		22.65	1254	1525.82		22.65	1321.03	1525.82
22.67	1464.57	1526.88		22.67	1411.47	1526.88		22.67	1305.53	1526.88		22.67	1341.29	1526.88
22.68	1347.16	1527.94		22.68	1343.89	1527.94		22.68	1273.57	1527.94		22.68	1389.03	1527.94
22.7	1234.01	1529		22.7	1482.01	1529		22.7	1386.01	1529		22.7	1346.4	1529
22.72	1309.52	1530.06		22.72	1448.34	1530.06		22.72	1333.27	1530.06		22.72	1329.29	1530.06
22.73	1273.56	1531.12		22.73	1400.23	1531.12		22.73	1353.25	1531.12		22.73	1381.52	1531.12
22.75	1368.53	1532.18		22.75	1320.3	1532.18		22.75	1454.37	1532.18		22.75	1392.41	1532.18
22.77	1353.49	1533.24		22.77	1311.93	1533.24		22.77	1442.55	1533.24		22.77	1290.96	1533.24
22.78	1407.76	1534.3		22.78	1271.59	1534.3		22.78	1430.31	1534.3		22.78	1337.07	1534.3
22.8	1355.42	1535.36		22.8	1330.78	1535.36		22.8	1337.68	1535.36		22.8	1306.13	1535.36
22.82	1363.09	1536.42		22.82	1446.38	1536.42		22.82	1364.05	1536.42		22.82	1384.65	1536.42
22.83	1346.07	1537.47		22.83	1413.01	1537.47		22.83	1340.43	1537.47		22.83	1322.58	1537.47
22.85	1337.16	1538.53		22.85	1442.19	1538.53		22.85	1407.76	1538.53		22.85	1450.22	1538.53
22.87	1308.45	1539.59		22.87	1458.38	1539.59		22.87	1545.5	1539.59		22.87	1595.44	1539.59
22.88	1410.96	1540.65		22.88	1406.3	1540.65		22.88	1400.11	1540.65		22.88	1470.89	1540.65
22.9	1259.09	1541.71		22.9	1354.91	1541.71		22.9	1360.53	1541.71		22.9	1383.15	1541.71
22.92	1368.63	1542.77		22.92	1258.25	1542.77		22.92	1406.72	1542.77		22.92	1414.13	1542.77
22.93	1414.63	1543.83		22.93	1302.39	1543.83		22.93	1225.91	1543.83		22.93	1474	1543.83
22.95	1368.46	1544.89		22.95	1363.27	1544.89		22.95	1351.94	1544.89		22.95	1372	1544.89
22.97	1447.32	1545.95		22.97	1332.3	1545.95		22.97	1392.71	1545.95		22.97	1351.59	1545.95
22.98	1412.75	1547		22.98	1309.91	1547		22.98	1314.13	1547		22.98	1362.41	1547
23	1415.08	1548.06		23	1384.83	1548.06		23	1362.87	1548.06		23	1372.43	1548.06
23.02	1347.77	1549.12		23.02	1387.31	1549.12		23.02	1371.97	1549.12		23.02	1360.39	1549.12
23.03	1471.63	1550.18		23.03	1438.13	1550.18		23.03	1407.28	1550.18		23.03	1372.23	1550.18
23.05	1422.81	1551.24		23.05	1312.13	1551.24		23.05	1410.28	1551.24		23.05	1339.33	1551.24
23.07	1351.06	1552.3		23.07	1371.85	1552.3		23.07	1403.7	1552.3		23.07	1311.24	1552.3
23.08	1320.75	1553.36		23.08	1310.26	1553.36		23.08	1447.34	1553.36		23.08	1396.32	1553.36
23.1	1332.82	1554.42		23.1	1307.74	1554.42		23.1	1497.05	1554.42		23.1	1367.1	1554.42
23.12	1402.96	1555.47		23.12	1309.82	1555.47		23.12	1433.71	1555.47		23.12	1374.89	1555.47
23.13	1296.41	1556.53		23.13	1379.47	1556.53		23.13	1382.72	1556.53		23.13	1436.07	1556.53
23.15	1322.87	1557.59		23.15	1370.72	1557.59		23.15	1344.66	1557.59		23.15	1492.36	1557.59
23.17	1272.46	1558.65		23.17	1483.63	1558.65		23.17	1374.28	1558.65		23.17	1403.63	1558.65
23.18	1372.26	1559.71		23.18	1364.58	1559.71		23.18	1282.62	1559.71		23.18	1357.79	1559.71
23.2	1377.21	1560.77		23.2	1409.82	1560.77		23.2	1231.8	1560.77		23.2	1368.29	1560.77
23.22	1457.01	1561.83		23.22	1352.34	1561.83		23.22	1319.15	1561.83		23.22	1292.1	1561.83
23.23	1260.81	1562.88		23.23	1468.28	1562.88		23.23	1411.48	1562.88		23.23	1324.07	1562.88
23.25	1330.68	1563.94		23.25	1477.16	1563.94		23.25	1492.76	1563.94		23.25	1285.4	1563.94
23.27	1342.07	1565		23.27	1401.17	1565		23.27	1426.86	1565		23.27	1476.08	1565
23.28	1387.98	1566.06		23.28	1447.19	1566.06		23.28	1476.49	1566.06		23.28	1598.73	1566.06
23.3	1470.45	1567.12		23.3	1579.64	1567.12		23.3	1523.22	1567.12		23.3	1545.45	1567.12
23.32	1331.02	1568.18		23.32	1493.18	1568.18		23.32	1413.38	1568.18		23.32	1500.5	1568.18
23.33	1393.69	1569.24		23.33	1682.77	1569.24		23.33	1481.5	1569.24		23.33	1508.09	1569.24
23.35	1414.34	1570.29		23.35	1655.44	1570.29		23.35	1481.05	1570.29		23.35	1471.88	1570.29
23.37	1376.81	1571.35		23.37	1580.41	1571.35		23.37	1446.36	1571.35		23.37	1534.46	1571.35
23.38	1403.25	1572.41		23.38	1521.48	1572.41		23.38	1407.03	1572.41		23.38	1546.51	1572.41
23.4	1311.19	1573.47		23.4	1598.34	1573.47		23.4	1531.95	1573.47		23.4	1628.21	1573.47
23.42	1365.7	1574.53		23.42	1433.09	1574.53		23.42	1370.99	1574.53		23.42	1746.86	1574.53
23.43	1386.7	1575.59		23.43	1437.44	1575.59		23.43	1314.61	1575.59		23.43	1752.11	1575.59
23.45	1333	1576.64		23.45	1390.82	1576.64		23.45	1328.37	1576.64		23.45	1638.41	1576.64
23.47	1344.73	1577.7		23.47	1352.42	1577.7		23.47	1316.33	1577.7		23.47	1684.82	1577.7
23.48	1460.63	1578.76		23.48	1441.26	1578.76		23.48	1312.15	1578.76		23.48	1606.63	1578.76
23.5	1488.68	1579.82		23.5	1489.31	1579.82		23.5	1308.86	1579.82		23.5	1665.71	1579.82
23.52	1360.33	1580.88		23.52	1572.34	1580.88		23.52	1364.36	1580.88		23.52	1554.73	1580.88
23.53	1481.27	1581.93		23.53	1408.46	1581.93		23.53	1342.36	1581.93		23.53	1493.87	1581.93
23.55	1298.52	1582.99		23.55	1483.3	1582.99		23.55	1471.59	1582.99		23.55	1430.3	1582.99
23.57	1356.37	1584.05		23.57	1415.75	1584.05		23.57	1461.62	1584.05		23.57	1352.65	1584.05
23.58	1387.42	1585.11		23.58	1420.75	1585.11		23.58	1475.55	1585.11		23.58	1409.68	1585.11
23.6	1443.75	1586.17		23.6	1512.03	1586.17		23.6	1509.75	1586.17		23.6	1475.04	1586.17
23.62	1439.54	1587.22		23.62	1434.87	1587.22		23.62	1520.55	1587.22		23.62	1450.52	1587.22
23.63	1380.75	1588.28		23.63	1443.7	1588.28		23.63	1534.01	1588.28		23.63	1516.66	1588.28
23.65	1491.19	1589.34		23.65	1415.99	1589.34		23.65	1605.21	1589.34		23.65	1465.8	1589.34
23.67	1449.89	1590.4		23.67	1533.72	1590.4		23.67	1536.59	1590.4		23.67	1439.05	1590.4
23.68	1483.95	1591.46		23.68	1474.45	1591.46		23.68	1590.3	1591.46		23.68	1328.41	1591.46
23.7	1612.16	1592.51		23.7	1536.28	1592.51		23.7	1535.97	1592.51		23.7	1440.67	1592.51
23.72	1557.47	1593.57		23.72	1520.45	1593.57		23.72	1417.41	1593.57		23.72	1450.32	1593.57
23.73	1665.38	1594.63		23.73	1633	1594.63		23.73	1393.21	1594.63		23.73	1497.6	1594.63
23.75	1495.11	1595.69		23.75	1601.34	1595.69		23.75	1415.61	1595.69		23.75	1334.65	1595.69
23.77	1385.47	1596.75		23.77	1635.25	1596.75		23.77	1470.71	1596.75		23.77	1382.98	1596.75
23.78	1378.58	1597.8		23.78	1538.83	1597.8		23.78	1408.75	1597.8		23.78	1371.39	1597.8
23.8	1325.04	1598.86		23.8	1538.72	1598.86		23.8	1381.33	1598.86		23.8	1354.23	1598.86
23.82	1458.84	1599.92		23.82	1469.51	1599.92		23.82	1430.58	1599.92		23.82	1430.24	1599.92
23.83	1376.46	1600.98		23.83	1543.42	1600.98		23.83	1409.79	1600.98		23.83	1372.85	1600.98
23.85	1325.32	1602.04		23.85	1531.02	1602.04		23.85	1444.59	1602.04		23.85	1398.58	1602.04
23.87	1357.02	1603.09		23.87	1614.87	1603.09		23.87	1511.86	1603.09		23.87	1384.18	1603.09
23.88	1413.6	1604.15		23.88	1689.86	1604.15		23.88	1422.81	1604.15		23.88	1348.66	1604.15
23.9	1447	1605.21		23.9	1596.5	1605.21		23.9	1444.49	1605.21		23.9	1521.17	1605.21
23.92	1528.74	1606.27		23.92	1629.67	1606.27		23.92	1345.02	1606.27		23.92	1462.05	1606.27
23.93	1516.75	1607.32		23.93	1578.64	1607.32		23.93	1450.63	1607.32		23.93	1483.23	1607.32
23.95	1454.84	1608.38		23.95	1616.57	1608.38		23.95	1488.37	1608.38		23.95	1368.93	1608.38
23.97	1473.65	1609.44		23.97	1638.85	1609.44		23.97	1434.87	1609.44		23.97	1388.89	1609.44
23.98	1431.65	1610.5		23.98	1525.9	1610.5		23.98	1421.93	1610.5		23.98	1280.56	1610.5
24	1386.22	1611.55		24	1393.49	1611.55		24	1416.13	1611.55		24	1370.02	1611.55
24.02	1369.11	1612.61		24.02	1374.83	1612.61		24.02	1406.46	1612.61		24.02	1529.62	1612.61
24.03	1380.67	1613.67		24.03	1412.73	1613.67		24.03	1365.87	1613.67		24.03	1477.37	1613.67
24.05	1421.96	1614.73		24.05	1395.97	1614.73		24.05	1322.61	1614.73		24.05	1640.37	1614.73
24.07	1404.95	1615.78		24.07	1436.68	1615.78		24.07	1456.27	1615.78		24.07	1621.2	1615.78
24.08	1457.57	1616.84		24.08	1453.35	1616.84		24.08	1498.71	1616.84		24.08	1524.6	1616.84
24.1	1336.87	1617.9		24.1	1425.4	1617.9		24.1	1533.57	1617.9		24.1	1446.61	1617.9
24.12	1435.17	1618.96		24.12	1550.56	1618.96		24.12	1577.17	1618.96		24.12	1416.82	1618.96
24.13	1452.8	1620.01		24.13	1330.9	1620.01		24.13	1431.72	1620.01		24.13	1508.51	1620.01
24.15	1285.49	1621.07		24.15	1432.08	1621.07		24.15	1423.65	1621.07		24.15	1475.52	1621.07
24.17	1382.14	1622.13		24.17	1498.37	1622.13		24.17	1429.77	1622.13		24.17	1331.74	1622.13
24.18	1384.95	1623.19		24.18	1471.66	1623.19		24.18	1415.23	1623.19		24.18	1310.53	1623.19
24.2	1429.76	1624.24		24.2	1482.33	1624.24		24.2	1381.76	1624.24		24.2	1272.65	1624.24
24.22	1372.64	1625.3		24.22	1466.06	1625.3		24.22	1332.21	1625.3		24.22	1368.18	1625.3
24.23	1387.8	1626.36		24.23	1631.45	1626.36		24.23	1314.53	1626.36		24.23	1428.95	1626.36
24.25	1463.95	1627.42		24.25	1432.41	1627.42		24.25	1291.27	1627.42		24.25	1394.26	1627.42
24.27	1389.41	1628.47		24.27	1399.06	1628.47		24.27	1296.92	1628.47		24.27	1454.48	1628.47
24.28	1414.41	1629.53		24.28	1395.17	1629.53		24.28	1390.85	1629.53		24.28	1433.19	1629.53
24.3	1411.15	1630.59		24.3	1489.09	1630.59		24.3	1376.58	1630.59		24.3	1388.48	1630.59
24.32	1379.56	1631.64		24.32	1370.39	1631.64		24.32	1415.15	1631.64		24.32	1262.81	1631.64
24.33	1462.57	1632.7		24.33	1454.41	1632.7		24.33	1495.21	1632.7		24.33	1359.79	1632.7
24.35	1335.21	1633.76		24.35	1456.6	1633.76		24.35	1384.14	1633.76		24.35	1375.09	1633.76
24.37	1358.03	1634.82		24.37	1453.8	1634.82		24.37	1401.9	1634.82		24.37	1351.97	1634.82
24.38	1347.04	1635.87		24.38	1362.92	1635.87		24.38	1518.04	1635.87		24.38	1357.02	1635.87
24.4	1332.3	1636.93		24.4	1389.2	1636.93		24.4	1412.44	1636.93		24.4	1556.85	1636.93
24.42	1376.04	1637.99		24.42	1415.46	1637.99		24.42	1349.13	1637.99		24.42	1458.27	1637.99
24.43	1262.25	1639.04		24.43	1360.86	1639.04		24.43	1450.21	1639.04		24.43	1437	1639.04
24.45	1380.38	1640.1		24.45	1417.31	1640.1		24.45	1442.47	1640.1		24.45	1440.69	1640.1
24.47	1432.08	1641.16		24.47	1423.4	1641.16		24.47	1359.89	1641.16		24.47	1394.78	1641.16
24.48	1440.5	1642.22		24.48	1426.43	1642.22		24.48	1397.94	1642.22		24.48	1374.69	1642.22
24.5	1454.32	1643.27		24.5	1371.21	1643.27		24.5	1350.3	1643.27		24.5	1331.97	1643.27
24.52	1533.83	1644.33		24.52	1482.31	1644.33		24.52	1410.5	1644.33		24.52	1280.88	1644.33
24.53	1541.07	1645.39		24.53	1432.44	1645.39		24.53	1381.22	1645.39		24.53	1325.76	1645.39
24.55	1505.15	1646.44		24.55	1436.74	1646.44		24.55	1411.49	1646.44		24.55	1374.2	1646.44
24.57	1597.86	1647.5		24.57	1399.4	1647.5		24.57	1375.82	1647.5		24.57	1448.08	1647.5
24.58	1585.48	1648.56		24.58	1563.76	1648.56		24.58	1462.6	1648.56		24.58	1579.15	1648.56
24.6	1560.85	1649.61		24.6	1647.53	1649.61		24.6	1396.9	1649.61		24.6	1510.29	1649.61
24.62	1430.08	1650.67		24.62	1478.15	1650.67		24.62	1425.76	1650.67		24.62	1400.39	1650.67
24.63	1348.86	1651.73		24.63	1437.65	1651.73		24.63	1425.38	1651.73		24.63	1462.94	1651.73
24.65	1437.59	1652.78		24.65	1389.05	1652.78		24.65	1470.52	1652.78		24.65	1409.13	1652.78
24.67	1466.68	1653.84		24.67	1449.23	1653.84		24.67	1587.19	1653.84		24.67	1397.03	1653.84
24.68	1413.95	1654.9		24.68	1442.07	1654.9		24.68	1601.62	1654.9		24.68	1362.1	1654.9
24.7	1383.65	1655.95		24.7	1499.82	1655.95		24.7	1597.83	1655.95		24.7	1413.42	1655.95
24.72	1371.93	1657.01		24.72	1516.02	1657.01		24.72	1476.05	1657.01		24.72	1442.57	1657.01
24.73	1401.69	1658.07		24.73	1376.33	1658.07		24.73	1522.23	1658.07		24.73	1471.61	1658.07
24.75	1491.15	1659.12		24.75	1422.4	1659.12		24.75	1540.87	1659.12		24.75	1477.07	1659.12
24.77	1621.46	1660.18		24.77	1443.59	1660.18		24.77	1682.91	1660.18		24.77	1534.68	1660.18
24.78	1497.05	1661.24		24.78	1455.13	1661.24		24.78	1518.03	1661.24		24.78	1405.1	1661.24
24.8	1488.79	1662.29		24.8	1439.42	1662.29		24.8	1570.73	1662.29		24.8	1394.47	1662.29
24.82	1529.58	1663.35		24.82	1506.05	1663.35		24.82	1480.62	1663.35		24.82	1440.45	1663.35
24.83	1396.65	1664.41		24.83	1562.77	1664.41		24.83	1461.3	1664.41		24.83	1450.88	1664.41
24.85	1572.01	1665.46		24.85	1540.8	1665.46		24.85	1468.91	1665.46		24.85	1485.94	1665.46
24.87	1534.16	1666.52		24.87	1557.36	1666.52		24.87	1493.2	1666.52		24.87	1536.76	1666.52
24.88	1403.51	1667.58		24.88	1576.83	1667.58		24.88	1514.9	1667.58		24.88	1426.75	1667.58
24.9	1513.64	1668.63		24.9	1505.23	1668.63		24.9	1508.01	1668.63		24.9	1473.57	1668.63
24.92	1528.87	1669.69		24.92	1587.21	1669.69		24.92	1547.03	1669.69		24.92	1422.71	1669.69
24.93	1397.72	1670.75		24.93	1664.14	1670.75		24.93	1506.4	1670.75		24.93	1469.01	1670.75
24.95	1482.69	1671.8		24.95	1682.42	1671.8		24.95	1517.64	1671.8		24.95	1536.79	1671.8
24.97	1380.21	1672.86		24.97	1529.9	1672.86		24.97	1486.15	1672.86		24.97	1524.24	1672.86
24.98	1427.76	1673.92		24.98	1572.31	1673.92		24.98	1472.57	1673.92		24.98	1597.53	1673.92
25	1459.87	1674.97		25	1507.27	1674.97		25	1561.53	1674.97		25	1588.3	1674.97
25.02	1519.14	1676.03		25.02	1457.01	1676.03		25.02	1579.45	1676.03		25.02	1476.3	1676.03
25.03	1578.32	1677.09		25.03	1553.58	1677.09		25.03	1638.11	1677.09		25.03	1530.86	1677.09
25.05	1488.26	1678.14		25.05	1577.47	1678.14		25.05	1551.41	1678.14		25.05	1526.41	1678.14
25.07	1509.7	1679.2		25.07	1583.18	1679.2		25.07	1496.03	1679.2		25.07	1607.32	1679.2
25.08	1443.41	1680.25		25.08	1544.75	1680.25		25.08	1718.5	1680.25		25.08	1615.03	1680.25
25.1	1401.39	1681.31		25.1	1513.31	1681.31		25.1	1693.3	1681.31		25.1	1523.12	1681.31
25.12	1414.1	1682.37		25.12	1656.87	1682.37		25.12	1770.85	1682.37		25.12	1484.89	1682.37
25.13	1429.14	1683.42		25.13	1691.42	1683.42		25.13	1556.23	1683.42		25.13	1470.77	1683.42
25.15	1414.23	1684.48		25.15	1720.19	1684.48		25.15	1503.91	1684.48		25.15	1348.27	1684.48
25.17	1469.39	1685.54		25.17	1618.81	1685.54		25.17	1500.78	1685.54		25.17	1376.35	1685.54
25.18	1570.64	1686.59		25.18	1463.95	1686.59		25.18	1505.44	1686.59		25.18	1514.52	1686.59
25.2	1558.67	1687.65		25.2	1456.28	1687.65		25.2	1408.18	1687.65		25.2	1500.66	1687.65
25.22	1520.52	1688.7		25.22	1512.94	1688.7		25.22	1457.7	1688.7		25.22	1452.41	1688.7
25.23	1484.38	1689.76		25.23	1503.98	1689.76		25.23	1502.81	1689.76		25.23	1437.49	1689.76
25.25	1469.19	1690.82		25.25	1614.19	1690.82		25.25	1526.95	1690.82		25.25	1396.7	1690.82
25.27	1393.43	1691.87		25.27	1562.61	1691.87		25.27	1520.93	1691.87		25.27	1445.47	1691.87
25.28	1458.38	1692.93		25.28	1451.88	1692.93		25.28	1463.69	1692.93		25.28	1548.51	1692.93
25.3	1358.68	1693.99		25.3	1425.09	1693.99		25.3	1589.6	1693.99		25.3	1562.75	1693.99
25.32	1421.02	1695.04		25.32	1397.09	1695.04		25.32	1342.53	1695.04		25.32	1533.99	1695.04
25.33	1450.46	1696.1		25.33	1469.51	1696.1		25.33	1396.53	1696.1		25.33	1651.03	1696.1
25.35	1373.45	1697.15		25.35	1579.78	1697.15		25.35	1351.51	1697.15		25.35	1622.5	1697.15
25.37	1480.93	1698.21		25.37	1626.79	1698.21		25.37	1502.37	1698.21		25.37	1577.71	1698.21
25.38	1478.48	1699.27		25.38	1528.68	1699.27		25.38	1426.06	1699.27		25.38	1609.13	1699.27
25.4	1510.71	1700.32		25.4	1485.49	1700.32		25.4	1550.93	1700.32		25.4	1588.77	1700.32
25.42	1431.12	1701.38		25.42	1453.12	1701.38		25.42	1491.47	1701.38		25.42	1512.5	1701.38
25.43	1490.91	1702.43		25.43	1642.02	1702.43		25.43	1479.85	1702.43		25.43	1538.69	1702.43
25.45	1454.8	1703.49		25.45	1585.82	1703.49		25.45	1498.75	1703.49		25.45	1459.23	1703.49
25.47	1478.75	1704.54		25.47	1589.57	1704.54		25.47	1629.49	1704.54		25.47	1590.57	1704.54
25.48	1429.59	1705.6		25.48	1578.26	1705.6		25.48	1546.9	1705.6		25.48	1569.57	1705.6
25.5	1449.2	1706.66		25.5	1546.18	1706.66		25.5	1537.44	1706.66		25.5	1699.77	1706.66
25.52	1509.34	1707.71		25.52	1601.71	1707.71		25.52	1493.71	1707.71		25.52	1624.5	1707.71
25.53	1523.07	1708.77		25.53	1624.94	1708.77		25.53	1501.87	1708.77		25.53	1442.89	1708.77
25.55	1542.82	1709.82		25.55	1629.98	1709.82		25.55	1527.81	1709.82		25.55	1487.97	1709.82
25.57	1469.64	1710.88		25.57	1539.85	1710.88		25.57	1591.83	1710.88		25.57	1541.66	1710.88
25.58	1504.45	1711.94		25.58	1624.62	1711.94		25.58	1542.21	1711.94		25.58	1458.19	1711.94
25.6	1576.18	1712.99		25.6	1488.62	1712.99		25.6	1482.47	1712.99		25.6	1566.74	1712.99
25.62	1509.8	1714.05		25.62	1503.99	1714.05		25.62	1475.68	1714.05		25.62	1644.21	1714.05
25.63	1450.94	1715.1		25.63	1409.43	1715.1		25.63	1413.6	1715.1		25.63	1569.96	1715.1
25.65	1547.13	1716.16		25.65	1473.87	1716.16		25.65	1654.06	1716.16		25.65	1534.61	1716.16
25.67	1567.59	1717.21		25.67	1504.28	1717.21		25.67	1518.12	1717.21		25.67	1535.23	1717.21
25.68	1538.37	1718.27		25.68	1517.37	1718.27		25.68	1572.69	1718.27		25.68	1558.04	1718.27
25.7	1644.48	1719.33		25.7	1472.88	1719.33		25.7	1512.61	1719.33		25.7	1520.06	1719.33
25.72	1546.77	1720.38		25.72	1589.21	1720.38		25.72	1563.37	1720.38		25.72	1522.5	1720.38
25.73	1557.31	1721.44		25.73	1427.87	1721.44		25.73	1523.93	1721.44		25.73	1587.5	1721.44
25.75	1519.86	1722.49		25.75	1478.33	1722.49		25.75	1540.42	1722.49		25.75	1569.01	1722.49
25.77	1479	1723.55		25.77	1401.35	1723.55		25.77	1605.7	1723.55		25.77	1807.19	1723.55
25.78	1554.38	1724.6		25.78	1546.73	1724.6		25.78	1589.69	1724.6		25.78	1709.61	1724.6
25.8	1585.67	1725.66		25.8	1511.22	1725.66		25.8	1524.69	1725.66		25.8	1791.18	1725.66
25.82	1456.68	1726.71		25.82	1437.77	1726.71		25.82	1475.77	1726.71		25.82	1774.75	1726.71
25.83	1642.7	1727.77		25.83	1458.01	1727.77		25.83	1517.17	1727.77		25.83	1699.14	1727.77
25.85	1700.24	1728.83		25.85	1581.46	1728.83		25.85	1395.63	1728.83		25.85	1696.58	1728.83
25.87	1522.87	1729.88		25.87	1549.44	1729.88		25.87	1477.14	1729.88		25.87	1629.23	1729.88
25.88	1523.39	1730.94		25.88	1536.6	1730.94		25.88	1399.61	1730.94		25.88	1545.7	1730.94
25.9	1465.56	1731.99		25.9	1543.87	1731.99		25.9	1382.42	1731.99		25.9	1639.76	1731.99
25.92	1575.48	1733.05		25.92	1536.98	1733.05		25.92	1469.87	1733.05		25.92	1487.96	1733.05
25.93	1475.49	1734.1		25.93	1609.41	1734.1		25.93	1515.44	1734.1		25.93	1467.61	1734.1
25.95	1553.73	1735.16		25.95	1550.59	1735.16		25.95	1471.4	1735.16		25.95	1426.03	1735.16
25.97	1474.58	1736.21		25.97	1512.72	1736.21		25.97	1552.95	1736.21		25.97	1439.74	1736.21
25.98	1537.8	1737.27		25.98	1441.98	1737.27		25.98	1603.78	1737.27		25.98	1564.71	1737.27
26	1441.93	1738.32		26	1567.22	1738.32		26	1507.21	1738.32		26	1598.15	1738.32
26.02	1511.32	1739.38		26.02	1662.59	1739.38		26.02	1633.18	1739.38		26.02	1576.27	1739.38
26.03	1605.51	1740.43		26.03	1603.34	1740.43		26.03	1769.94	1740.43		26.03	1649.75	1740.43
26.05	1560.24	1741.49		26.05	1608	1741.49		26.05	1680.3	1741.49		26.05	1552.74	1741.49
26.07	1531.62	1742.55		26.07	1551.54	1742.55		26.07	1684.45	1742.55		26.07	1596.27	1742.55
26.08	1564.67	1743.6		26.08	1523.54	1743.6		26.08	1691.92	1743.6		26.08	1410.85	1743.6
26.1	1663.4	1744.66		26.1	1583.15	1744.66		26.1	1561.82	1744.66		26.1	1505.04	1744.66
26.12	1553.58	1745.71		26.12	1539.17	1745.71		26.12	1471.24	1745.71		26.12	1449.67	1745.71
26.13	1594.74	1746.77		26.13	1518.04	1746.77		26.13	1570.81	1746.77		26.13	1489.48	1746.77
26.15	1608.55	1747.82		26.15	1534.03	1747.82		26.15	1555.33	1747.82		26.15	1516.73	1747.82
26.17	1580.75	1748.88		26.17	1565.3	1748.88		26.17	1512.05	1748.88		26.17	1438.85	1748.88
26.18	1406.14	1749.93		26.18	1586.58	1749.93		26.18	1401.88	1749.93		26.18	1366.59	1749.93
26.2	1575.45	1750.99		26.2	1544.41	1750.99		26.2	1502.38	1750.99		26.2	1525.41	1750.99
26.22	1559.5	1752.04		26.22	1609.86	1752.04		26.22	1508.12	1752.04		26.22	1432.65	1752.04
26.23	1484.11	1753.1		26.23	1580.01	1753.1		26.23	1525.84	1753.1		26.23	1472.66	1753.1
26.25	1540.98	1754.15		26.25	1610.26	1754.15		26.25	1556.24	1754.15		26.25	1488.96	1754.15
26.27	1542.97	1755.21		26.27	1594.61	1755.21		26.27	1469.24	1755.21		26.27	1553.66	1755.21
26.28	1561.49	1756.26		26.28	1578.93	1756.26		26.28	1529.83	1756.26		26.28	1558.76	1756.26
26.3	1538.27	1757.32		26.3	1487.73	1757.32		26.3	1479.15	1757.32		26.3	1610.65	1757.32
26.32	1497.14	1758.37		26.32	1462.74	1758.37		26.32	1575.46	1758.37		26.32	1600.64	1758.37
26.33	1528.4	1759.43		26.33	1541.97	1759.43		26.33	1488.85	1759.43		26.33	1633.03	1759.43
26.35	1635.97	1760.48		26.35	1501.87	1760.48		26.35	1557.9	1760.48		26.35	1721.62	1760.48
26.37	1636.05	1761.54		26.37	1572.15	1761.54		26.37	1533.32	1761.54		26.37	1705.29	1761.54
26.38	1608.01	1762.59		26.38	1646.86	1762.59		26.38	1504.09	1762.59		26.38	1768.07	1762.59
26.4	1501.01	1763.65		26.4	1562.14	1763.65		26.4	1443.83	1763.65		26.4	1662.75	1763.65
26.42	1556.04	1764.7		26.42	1590.23	1764.7		26.42	1506.25	1764.7		26.42	1681.97	1764.7
26.43	1680.59	1765.76		26.43	1577.96	1765.76		26.43	1558.16	1765.76		26.43	1679.36	1765.76
26.45	1447.74	1766.81		26.45	1542.67	1766.81		26.45	1611.22	1766.81		26.45	1614.15	1766.81
26.47	1562.54	1767.87		26.47	1629.91	1767.87		26.47	1631.91	1767.87		26.47	1572.36	1767.87
26.48	1488.94	1768.92		26.48	1565.85	1768.92		26.48	1706.03	1768.92		26.48	1473.95	1768.92
26.5	1525.8	1769.98		26.5	1641.14	1769.98		26.5	1571.11	1769.98		26.5	1459.74	1769.98
26.52	1502.82	1771.03		26.52	1560.77	1771.03		26.52	1636.41	1771.03		26.52	1574.24	1771.03
26.53	1603.14	1772.09		26.53	1630.46	1772.09		26.53	1701.08	1772.09		26.53	1521.42	1772.09
26.55	1494.79	1773.14		26.55	1595.77	1773.14		26.55	1609.76	1773.14		26.55	1574.21	1773.14
26.57	1485.62	1774.19		26.57	1547.15	1774.19		26.57	1696.89	1774.19		26.57	1463.85	1774.19
26.58	1519.91	1775.25		26.58	1498.46	1775.25		26.58	1598.52	1775.25		26.58	1455.14	1775.25
26.6	1518.56	1776.3		26.6	1476.4	1776.3		26.6	1508.13	1776.3		26.6	1501.01	1776.3
26.62	1514.13	1777.36		26.62	1612.6	1777.36		26.62	1469.89	1777.36		26.62	1640.56	1777.36
26.63	1550.09	1778.41		26.63	1610.04	1778.41		26.63	1500.47	1778.41		26.63	1498.52	1778.41
26.65	1520.57	1779.47		26.65	1669.74	1779.47		26.65	1639.88	1779.47		26.65	1678.7	1779.47
26.67	1565.36	1780.52		26.67	1614.45	1780.52		26.67	1659.77	1780.52		26.67	1663.35	1780.52
26.68	1572.94	1781.58		26.68	1625.25	1781.58		26.68	1633.73	1781.58		26.68	1668.12	1781.58
26.7	1515.78	1782.63		26.7	1646.51	1782.63		26.7	1512.32	1782.63		26.7	1685.92	1782.63
26.72	1476.19	1783.69		26.72	1793.16	1783.69		26.72	1522.58	1783.69		26.72	1702.44	1783.69
26.73	1431.88	1784.74		26.73	1745.56	1784.74		26.73	1445.48	1784.74		26.73	1724.77	1784.74
26.75	1515.19	1785.8		26.75	1559.84	1785.8		26.75	1394.03	1785.8		26.75	1629.19	1785.8
26.77	1512.11	1786.85		26.77	1701.48	1786.85		26.77	1509.81	1786.85		26.77	1734.18	1786.85
26.78	1578.84	1787.9		26.78	1671.91	1787.9		26.78	1545.71	1787.9		26.78	1862.84	1787.9
26.8	1705.12	1788.96		26.8	1617.01	1788.96		26.8	1646.94	1788.96		26.8	1734.64	1788.96
26.82	1637.03	1790.01		26.82	1535.35	1790.01		26.82	1616.32	1790.01		26.82	1853.06	1790.01
26.83	1664.98	1791.07		26.83	1573.52	1791.07		26.83	1573.47	1791.07		26.83	1677.31	1791.07
26.85	1530.89	1792.12		26.85	1587.19	1792.12		26.85	1686.48	1792.12		26.85	1619.79	1792.12
26.87	1512.08	1793.18		26.87	1639.43	1793.18		26.87	1618.42	1793.18		26.87	1601.12	1793.18
26.88	1585.22	1794.23		26.88	1666.22	1794.23		26.88	1679.14	1794.23		26.88	1587.17	1794.23
26.9	1700.3	1795.29		26.9	1569.05	1795.29		26.9	1704.81	1795.29		26.9	1565.84	1795.29
26.92	1506.3	1796.34		26.92	1625.99	1796.34		26.92	1738.1	1796.34		26.92	1597	1796.34
26.93	1558.34	1797.39		26.93	1682.01	1797.39		26.93	1876.55	1797.39		26.93	1621.77	1797.39
26.95	1538.6	1798.45		26.95	1675.59	1798.45		26.95	1750.69	1798.45		26.95	1719.7	1798.45
26.97	1540.32	1799.5		26.97	1608.84	1799.5		26.97	1599.92	1799.5		26.97	1683.22	1799.5
26.98	1615.14	1800.56		26.98	1666.41	1800.56		26.98	1835.2	1800.56		26.98	1566.17	1800.56
27	1556.2	1801.61		27	1691.72	1801.61		27	1727.41	1801.61		27	1663.09	1801.61
27.02	1607.62	1802.67		27.02	1673.32	1802.67		27.02	1654.98	1802.67		27.02	1695.6	1802.67
27.03	1702.33	1803.72		27.03	1693.43	1803.72		27.03	1673.15	1803.72		27.03	1655.79	1803.72
27.05	1623.5	1804.77		27.05	1646.76	1804.77		27.05	1594.51	1804.77		27.05	1626.14	1804.77
27.07	1546.29	1805.83		27.07	1628.25	1805.83		27.07	1659.06	1805.83		27.07	1544.42	1805.83
27.08	1562.08	1806.88		27.08	1566.18	1806.88		27.08	1674.32	1806.88		27.08	1488.25	1806.88
27.1	1600.1	1807.94		27.1	1679.48	1807.94		27.1	1606.84	1807.94		27.1	1438.7	1807.94
27.12	1693.19	1808.99		27.12	1686.04	1808.99		27.12	1669.67	1808.99		27.12	1410.09	1808.99
27.13	1579.39	1810.05		27.13	1597.06	1810.05		27.13	1695.99	1810.05		27.13	1388.77	1810.05
27.15	1505.29	1811.1		27.15	1658.81	1811.1		27.15	1755.24	1811.1		27.15	1498.83	1811.1
27.17	1544.45	1812.15		27.17	1839.54	1812.15		27.17	1658.49	1812.15		27.17	1643.15	1812.15
27.18	1555.59	1813.21		27.18	1785.27	1813.21		27.18	1620.14	1813.21		27.18	1575.26	1813.21
27.2	1593.57	1814.26		27.2	1797.05	1814.26		27.2	1652.42	1814.26		27.2	1590.94	1814.26
27.22	1595.06	1815.32		27.22	1628.97	1815.32		27.22	1648.17	1815.32		27.22	1488.81	1815.32
27.23	1687.07	1816.37		27.23	1729.74	1816.37		27.23	1564.23	1816.37		27.23	1566.81	1816.37
27.25	1673.21	1817.42		27.25	1643.13	1817.42		27.25	1638.36	1817.42		27.25	1555.5	1817.42
27.27	1681.13	1818.48		27.27	1770.29	1818.48		27.27	1527.68	1818.48		27.27	1558.69	1818.48
27.28	1593.6	1819.53		27.28	1642.13	1819.53		27.28	1624.61	1819.53		27.28	1505.45	1819.53
27.3	1582.4	1820.59		27.3	1599.4	1820.59		27.3	1508.76	1820.59		27.3	1633.82	1820.59
27.32	1577.74	1821.64		27.32	1627.51	1821.64		27.32	1475.6	1821.64		27.32	1644.97	1821.64
27.33	1563.64	1822.69		27.33	1726.4	1822.69		27.33	1474.75	1822.69		27.33	1581.38	1822.69
27.35	1635.69	1823.75		27.35	1745.98	1823.75		27.35	1521.93	1823.75		27.35	1682.39	1823.75
27.37	1574.14	1824.8		27.37	1677.97	1824.8		27.37	1506.01	1824.8		27.37	1603.66	1824.8
27.38	1578.96	1825.86		27.38	1610.42	1825.86		27.38	1624.86	1825.86		27.38	1607.93	1825.86
27.4	1729.65	1826.91		27.4	1700.98	1826.91		27.4	1584.04	1826.91		27.4	1551.18	1826.91
27.42	1710.88	1827.96		27.42	1670.05	1827.96		27.42	1613.67	1827.96		27.42	1593.43	1827.96
27.43	1693.28	1829.02		27.43	1621.46	1829.02		27.43	1781.65	1829.02		27.43	1590.49	1829.02
27.45	1642.74	1830.07		27.45	1710.55	1830.07		27.45	1649.51	1830.07		27.45	1617.88	1830.07
27.47	1726.34	1831.12		27.47	1605.95	1831.12		27.47	1626.31	1831.12		27.47	1579.92	1831.12
27.48	1629.54	1832.18		27.48	1554.87	1832.18		27.48	1665.32	1832.18		27.48	1530.01	1832.18
27.5	1664.57	1833.23		27.5	1652.34	1833.23		27.5	1717.98	1833.23		27.5	1577.95	1833.23
27.52	1621.25	1834.29		27.52	1595.07	1834.29		27.52	1666.04	1834.29		27.52	1571.37	1834.29
27.53	1615.09	1835.34		27.53	1607.89	1835.34		27.53	1640.9	1835.34		27.53	1681.06	1835.34
27.55	1674.97	1836.39		27.55	1568.62	1836.39		27.55	1564.43	1836.39		27.55	1689.22	1836.39
27.57	1623.74	1837.45		27.57	1686.92	1837.45		27.57	1529.77	1837.45		27.57	1564.54	1837.45
27.58	1650.67	1838.5		27.58	1683.91	1838.5		27.58	1620.97	1838.5		27.58	1536.42	1838.5
27.6	1610.76	1839.55		27.6	1698.79	1839.55		27.6	1625.96	1839.55		27.6	1566.35	1839.55
27.62	1603.29	1840.61		27.62	1680.7	1840.61		27.62	1668.68	1840.61		27.62	1603.14	1840.61
27.63	1705.23	1841.66		27.63	1649.37	1841.66		27.63	1695.17	1841.66		27.63	1771.26	1841.66
27.65	1632.06	1842.72		27.65	1592.62	1842.72		27.65	1626.22	1842.72		27.65	1799.23	1842.72
27.67	1861.62	1843.77		27.67	1490.8	1843.77		27.67	1643.33	1843.77		27.67	1779	1843.77
27.68	1831.81	1844.82		27.68	1601.65	1844.82		27.68	1645.17	1844.82		27.68	1651.16	1844.82
27.7	1889.21	1845.88		27.7	1689.32	1845.88		27.7	1592.03	1845.88		27.7	1662.7	1845.88
27.72	1747.16	1846.93		27.72	1776.42	1846.93		27.72	1508.77	1846.93		27.72	1600.68	1846.93
27.73	1790.79	1847.98		27.73	1858.04	1847.98		27.73	1516.6	1847.98		27.73	1700.71	1847.98
27.75	1594.17	1849.04		27.75	1613.36	1849.04		27.75	1574.39	1849.04		27.75	1687.94	1849.04
27.77	1605.3	1850.09		27.77	1589.33	1850.09		27.77	1651.9	1850.09		27.77	1836.7	1850.09
27.78	1680.91	1851.14		27.78	1586.36	1851.14		27.78	1660.79	1851.14		27.78	1913.95	1851.14
27.8	1740.32	1852.2		27.8	1691.43	1852.2		27.8	1709.99	1852.2		27.8	1938.47	1852.2
27.82	1698.06	1853.25		27.82	1685.28	1853.25		27.82	1650.35	1853.25		27.82	1814.62	1853.25
27.83	1694.36	1854.3		27.83	1716.57	1854.3		27.83	1531.71	1854.3		27.83	1760.87	1854.3
27.85	1652.57	1855.36		27.85	1707.94	1855.36		27.85	1597.14	1855.36		27.85	1733.62	1855.36
27.87	1659.59	1856.41		27.87	1652.64	1856.41		27.87	1645.37	1856.41		27.87	1668.69	1856.41
27.88	1654.76	1857.46		27.88	1685.45	1857.46		27.88	1698.07	1857.46		27.88	1804.18	1857.46
27.9	1626.8	1858.52		27.9	1628.76	1858.52		27.9	1730.64	1858.52		27.9	1654.97	1858.52
27.92	1633.02	1859.57		27.92	1590.86	1859.57		27.92	1757.68	1859.57		27.92	1885.8	1859.57
27.93	1552.69	1860.63		27.93	1591.43	1860.63		27.93	1714.05	1860.63		27.93	1925.26	1860.63
27.95	1660.61	1861.68		27.95	1668.7	1861.68		27.95	1720.61	1861.68		27.95	1835.64	1861.68
27.97	1588.24	1862.73		27.97	1713.91	1862.73		27.97	1727.97	1862.73		27.97	1935.05	1862.73
27.98	1539.13	1863.79		27.98	1726.69	1863.79		27.98	1748.54	1863.79		27.98	1760.35	1863.79
28	1585.43	1864.84		28	1583.01	1864.84		28	1773.38	1864.84		28	1544.12	1864.84
28.02	1581.68	1865.89		28.02	1737.11	1865.89		28.02	1751.83	1865.89		28.02	1573.24	1865.89
28.03	1747.69	1866.95		28.03	1777.23	1866.95		28.03	1602.42	1866.95		28.03	1630.44	1866.95
28.05	1559.52	1868		28.05	1601.47	1868		28.05	1486.49	1868		28.05	1616.5	1868
28.07	1593.03	1869.05		28.07	1525.2	1869.05		28.07	1661.68	1869.05		28.07	1735.61	1869.05
28.08	1614.37	1870.1		28.08	1536.82	1870.1		28.08	1684.13	1870.1		28.08	1763.13	1870.1
28.1	1741.75	1871.16		28.1	1674.27	1871.16		28.1	1655.75	1871.16		28.1	1808.23	1871.16
28.12	1718.11	1872.21		28.12	1630.85	1872.21		28.12	1614.41	1872.21		28.12	1927.79	1872.21
28.13	1631.74	1873.26		28.13	1651.34	1873.26		28.13	1595.17	1873.26		28.13	1868.16	1873.26
28.15	1621.04	1874.32		28.15	1746.45	1874.32		28.15	1531.49	1874.32		28.15	1828.07	1874.32
28.17	1683.73	1875.37		28.17	1803.09	1875.37		28.17	1514.4	1875.37		28.17	1789.32	1875.37
28.18	1685.23	1876.42		28.18	1902.98	1876.42		28.18	1696.66	1876.42		28.18	1729.46	1876.42
28.2	1803.19	1877.48		28.2	1705.92	1877.48		28.2	1604.17	1877.48		28.2	1686.22	1877.48
28.22	1662.13	1878.53		28.22	1664.07	1878.53		28.22	1890.57	1878.53		28.22	1675.19	1878.53
28.23	1692.95	1879.58		28.23	1645.71	1879.58		28.23	1809.66	1879.58		28.23	1576.72	1879.58
28.25	1706.27	1880.64		28.25	1621.52	1880.64		28.25	1793.12	1880.64		28.25	1637.29	1880.64
28.27	1565.99	1881.69		28.27	1644.47	1881.69		28.27	1709.74	1881.69		28.27	1644.3	1881.69
28.28	1671.76	1882.74		28.28	1776.12	1882.74		28.28	1689.2	1882.74		28.28	1746.45	1882.74
28.3	1730.43	1883.8		28.3	1814.82	1883.8		28.3	1727.6	1883.8		28.3	1748.76	1883.8
28.32	1837.57	1884.85		28.32	1804.31	1884.85		28.32	1874.12	1884.85		28.32	1683.06	1884.85
28.33	1679.11	1885.9		28.33	1691.6	1885.9		28.33	1814.8	1885.9		28.33	1634.31	1885.9
28.35	1677.49	1886.95		28.35	1717.77	1886.95		28.35	1753.89	1886.95		28.35	1609.41	1886.95
28.37	1588.67	1888.01		28.37	1695.03	1888.01		28.37	1804.74	1888.01		28.37	1624.2	1888.01
28.38	1674.46	1889.06		28.38	1751.47	1889.06		28.38	1819.68	1889.06		28.38	1715.57	1889.06
28.4	1705.74	1890.11		28.4	1785.86	1890.11		28.4	1735.54	1890.11		28.4	1674.59	1890.11
28.42	1661.06	1891.17		28.42	1733.49	1891.17		28.42	1729.13	1891.17		28.42	1583.77	1891.17
28.43	1776.51	1892.22		28.43	1631.99	1892.22		28.43	1959	1892.22		28.43	1636.6	1892.22
28.45	1745.92	1893.27		28.45	1617.32	1893.27		28.45	1812	1893.27		28.45	1675.15	1893.27
28.47	1661.98	1894.32		28.47	1611.05	1894.32		28.47	1703.99	1894.32		28.47	1742.07	1894.32
28.48	1596.14	1895.38		28.48	1603.42	1895.38		28.48	1686.08	1895.38		28.48	1541.25	1895.38
28.5	1641.37	1896.43		28.5	1688.29	1896.43		28.5	1559.33	1896.43		28.5	1564.04	1896.43
28.52	1571.75	1897.48		28.52	1686.21	1897.48		28.52	1666.45	1897.48		28.52	1629.23	1897.48
28.53	1565.52	1898.54		28.53	1692.04	1898.54		28.53	1693.12	1898.54		28.53	1640.88	1898.54
28.55	1642.34	1899.59		28.55	1626.58	1899.59		28.55	1672.11	1899.59		28.55	1614.99	1899.59
28.57	1639.23	1900.64		28.57	1688.88	1900.64		28.57	1672.8	1900.64		28.57	1519.02	1900.64
28.58	1589.96	1901.69		28.58	1637.08	1901.69		28.58	1662.71	1901.69		28.58	1580.52	1901.69
28.6	1665	1902.75		28.6	1846.8	1902.75		28.6	1680.25	1902.75		28.6	1637.53	1902.75
28.62	1752.78	1903.8		28.62	1756.11	1903.8		28.62	1778.16	1903.8		28.62	1642.82	1903.8
28.63	1679.24	1904.85		28.63	1669.11	1904.85		28.63	1827.96	1904.85		28.63	1656.52	1904.85
28.65	1654.14	1905.91		28.65	1728.59	1905.91		28.65	1782.53	1905.91		28.65	1688.3	1905.91
28.67	1676.21	1906.96		28.67	1586.69	1906.96		28.67	1745.85	1906.96		28.67	1828.54	1906.96
28.68	1735.68	1908.01		28.68	1665.74	1908.01		28.68	1639.98	1908.01		28.68	1705.12	1908.01
28.7	1747.54	1909.06		28.7	1615.9	1909.06		28.7	1762.15	1909.06		28.7	1769.2	1909.06
28.72	1724.9	1910.12		28.72	1552.27	1910.12		28.72	1776.76	1910.12		28.72	1837.59	1910.12
28.73	1677.07	1911.17		28.73	1656.57	1911.17		28.73	1681.41	1911.17		28.73	1734.51	1911.17
28.75	1782.59	1912.22		28.75	1721.44	1912.22		28.75	1679.08	1912.22		28.75	1700.13	1912.22
28.77	1646.36	1913.27		28.77	1667.68	1913.27		28.77	1772.94	1913.27		28.77	1773.21	1913.27
28.78	1771.73	1914.33		28.78	1827.39	1914.33		28.78	1714.31	1914.33		28.78	1787.21	1914.33
28.8	1668.03	1915.38		28.8	1814.57	1915.38		28.8	1596.82	1915.38		28.8	1708.97	1915.38
28.82	1639.98	1916.43		28.82	1744.7	1916.43		28.82	1542.71	1916.43		28.82	1701.96	1916.43
28.83	1683.53	1917.48		28.83	1742.45	1917.48		28.83	1597.68	1917.48		28.83	1622.77	1917.48
28.85	1662.78	1918.54		28.85	1744.54	1918.54		28.85	1646.01	1918.54		28.85	1633.51	1918.54
28.87	1674.91	1919.59		28.87	1777.46	1919.59		28.87	1817.16	1919.59		28.87	1717.35	1919.59
28.88	1642.23	1920.64		28.88	1881.44	1920.64		28.88	1736.63	1920.64		28.88	1774.02	1920.64
28.9	1710.02	1921.69		28.9	1803.44	1921.69		28.9	1892.09	1921.69		28.9	1769.54	1921.69
28.92	1602.09	1922.75		28.92	1900.57	1922.75		28.92	1910	1922.75		28.92	1660.16	1922.75
28.93	1691.55	1923.8		28.93	1796.88	1923.8		28.93	1787.95	1923.8		28.93	1759.97	1923.8
28.95	1753.87	1924.85		28.95	1717.37	1924.85		28.95	1702.34	1924.85		28.95	1785.15	1924.85
28.97	1671.09	1925.9		28.97	1749.76	1925.9		28.97	1673.56	1925.9		28.97	1679.2	1925.9
28.98	1636.96	1926.96		28.98	1766.78	1926.96		28.98	1710.18	1926.96		28.98	1697.63	1926.96
29	1798.95	1928.01		29	1677.63	1928.01		29	1717.93	1928.01		29	1714.12	1928.01
29.02	1741.95	1929.06		29.02	1783.89	1929.06		29.02	1725.9	1929.06		29.02	1816.91	1929.06
29.03	1653.41	1930.11		29.03	1836.41	1930.11		29.03	1636.94	1930.11		29.03	1791.89	1930.11
29.05	1803.58	1931.17		29.05	1765.3	1931.17		29.05	1685.05	1931.17		29.05	1839.39	1931.17
29.07	1739.14	1932.22		29.07	1794.79	1932.22		29.07	1591.11	1932.22		29.07	1698.99	1932.22
29.08	1897.65	1933.27		29.08	1718.27	1933.27		29.08	1655.33	1933.27		29.08	1849.98	1933.27
29.1	1866.12	1934.32		29.1	1808.78	1934.32		29.1	1704.08	1934.32		29.1	1851.49	1934.32
29.12	1729.7	1935.37		29.12	1841.03	1935.37		29.12	1739.51	1935.37		29.12	1824.76	1935.37
29.13	1646.39	1936.43		29.13	1932.16	1936.43		29.13	1659.41	1936.43		29.13	1956.85	1936.43
29.15	1621.03	1937.48		29.15	1811.02	1937.48		29.15	1683.73	1937.48		29.15	1829.42	1937.48
29.17	1568.37	1938.53		29.17	1909.45	1938.53		29.17	1591.93	1938.53		29.17	1755.9	1938.53
29.18	1748.53	1939.58		29.18	1916.42	1939.58		29.18	1700.9	1939.58		29.18	1702.65	1939.58
29.2	1747.68	1940.64		29.2	1882.83	1940.64		29.2	1638.71	1940.64		29.2	1888.77	1940.64
29.22	1703.2	1941.69		29.22	1832.7	1941.69		29.22	1614.89	1941.69		29.22	1811.66	1941.69
29.23	1691.11	1942.74		29.23	1892.78	1942.74		29.23	1649.55	1942.74		29.23	1830.25	1942.74
29.25	1721.65	1943.79		29.25	1784.45	1943.79		29.25	1609.01	1943.79		29.25	1906.7	1943.79
29.27	1720.51	1944.84		29.27	1886.59	1944.84		29.27	1663.63	1944.84		29.27	1917.56	1944.84
29.28	1731.43	1945.9		29.28	1878.65	1945.9		29.28	1653.81	1945.9		29.28	1997.6	1945.9
29.3	1737.79	1946.95		29.3	1946.64	1946.95		29.3	1732.86	1946.95		29.3	1831.67	1946.95
29.32	1777.75	1948		29.32	1885.16	1948		29.32	1757.66	1948		29.32	1764.5	1948
29.33	1678.44	1949.05		29.33	1845.84	1949.05		29.33	1772.6	1949.05		29.33	1899.37	1949.05
29.35	1778.68	1950.1		29.35	1948.75	1950.1		29.35	1739.11	1950.1		29.35	1838.8	1950.1
29.37	1727.52	1951.16		29.37	1778.33	1951.16		29.37	1813.36	1951.16		29.37	1727.76	1951.16
29.38	1798.27	1952.21		29.38	1835.78	1952.21		29.38	1694.12	1952.21		29.38	1770.41	1952.21
29.4	1699.21	1953.26		29.4	1902.97	1953.26		29.4	1657.77	1953.26		29.4	1844.95	1953.26
29.42	1738.68	1954.31		29.42	1711.48	1954.31		29.42	1542.57	1954.31		29.42	1937.08	1954.31
29.43	1651.99	1955.37		29.43	1812.11	1955.37		29.43	1740.73	1955.37		29.43	1905.22	1955.37
29.45	1730.68	1956.42		29.45	1732.78	1956.42		29.45	1742.69	1956.42		29.45	1920.44	1956.42
29.47	1726.65	1957.47		29.47	1780.37	1957.47		29.47	1744.97	1957.47		29.47	1820.6	1957.47
29.48	1719.23	1958.52		29.48	1744.37	1958.52		29.48	1716.42	1958.52		29.48	1824.52	1958.52
29.5	1723.66	1959.57		29.5	2007.19	1959.57		29.5	1711.7	1959.57		29.5	1787.47	1959.57
29.52	1765.81	1960.62		29.52	1914.05	1960.62		29.52	1838.84	1960.62		29.52	1787.45	1960.62
29.53	1843.83	1961.68		29.53	1981.5	1961.68		29.53	1716.37	1961.68		29.53	1760.16	1961.68
29.55	1836.02	1962.73		29.55	1723.63	1962.73		29.55	1717.25	1962.73		29.55	1730.08	1962.73
29.57	1729.46	1963.78		29.57	1814.06	1963.78		29.57	1744.21	1963.78		29.57	1650.8	1963.78
29.58	1758.89	1964.83		29.58	1780.81	1964.83		29.58	1671.82	1964.83		29.58	1568.02	1964.83
29.6	1764.22	1965.88		29.6	1705.32	1965.88		29.6	1701	1965.88		29.6	1556.43	1965.88
29.62	1744.07	1966.94		29.62	1661.23	1966.94		29.62	1795.43	1966.94		29.62	1558.83	1966.94
29.63	1816.23	1967.99		29.63	1706.06	1967.99		29.63	1749.62	1967.99		29.63	1666.23	1967.99
29.65	1747.52	1969.04		29.65	1749.13	1969.04		29.65	1783.7	1969.04		29.65	1692.7	1969.04
29.67	1902.38	1970.09		29.67	1697.96	1970.09		29.67	1733.2	1970.09		29.67	1677.2	1970.09
29.68	1761.43	1971.14		29.68	1657.96	1971.14		29.68	1895.97	1971.14		29.68	1540.04	1971.14
29.7	1775.39	1972.19		29.7	1737.61	1972.19		29.7	1769.71	1972.19		29.7	1698.52	1972.19
29.72	1748.18	1973.25		29.72	1673.22	1973.25		29.72	1952.26	1973.25		29.72	1703.03	1973.25
29.73	1788.65	1974.3		29.73	1807.48	1974.3		29.73	1833.35	1974.3		29.73	1803	1974.3
29.75	1800.3	1975.35		29.75	1777.9	1975.35		29.75	1794.69	1975.35		29.75	1831.54	1975.35
29.77	1734.13	1976.4		29.77	1837.26	1976.4		29.77	1814.2	1976.4		29.77	1758.71	1976.4
29.78	1753.7	1977.45		29.78	1888.86	1977.45		29.78	1933.88	1977.45		29.78	1770.08	1977.45
29.8	1745.57	1978.51		29.8	1751.78	1978.51		29.8	1848.81	1978.51		29.8	1800.77	1978.51
29.82	1781.14	1979.56		29.82	1750.36	1979.56		29.82	1795.8	1979.56		29.82	1858.37	1979.56
29.83	1636	1980.61		29.83	1755.56	1980.61		29.83	1997.21	1980.61		29.83	1761.34	1980.61
29.85	1682.9	1981.66		29.85	1838.07	1981.66		29.85	1840.11	1981.66		29.85	1707.15	1981.66
29.87	1788.99	1982.71		29.87	1782.66	1982.71		29.87	1806.61	1982.71		29.87	1881.58	1982.71
29.88	1810.49	1983.76		29.88	1715.7	1983.76		29.88	1774.5	1983.76		29.88	1835.84	1983.76
29.9	1831.65	1984.81		29.9	1831.42	1984.81		29.9	1642.25	1984.81		29.9	1780.16	1984.81
29.92	1784.97	1985.87		29.92	1868	1985.87		29.92	1638.03	1985.87		29.92	1765.92	1985.87
29.93	1799.55	1986.92		29.93	1841.45	1986.92		29.93	1775.55	1986.92		29.93	1842.55	1986.92
29.95	1834.48	1987.97		29.95	1763.31	1987.97		29.95	1764.19	1987.97		29.95	1871.88	1987.97
29.97	1895.67	1989.02		29.97	1797.23	1989.02		29.97	1664.88	1989.02		29.97	1758.36	1989.02
29.98	1811.99	1990.07		29.98	1850.71	1990.07		29.98	1709.17	1990.07		29.98	1864.01	1990.07
30	1868.28	1991.12		30	1770.72	1991.12		30	1750.86	1991.12		30	1831.15	1991.12
30.02	1839.91	1992.18		30.02	1706.9	1992.18		30.02	1690.34	1992.18		30.02	1792.74	1992.18
30.03	1742.14	1993.23		30.03	1790.9	1993.23		30.03	1750.35	1993.23		30.03	1718.9	1993.23
30.05	1808.41	1994.28		30.05	1828.5	1994.28		30.05	1885.36	1994.28		30.05	1816.29	1994.28
30.07	1684.78	1995.33		30.07	1832.14	1995.33		30.07	1865.32	1995.33		30.07	1799.15	1995.33
30.08	1770.99	1996.38		30.08	1856.71	1996.38		30.08	1720.5	1996.38		30.08	1906.6	1996.38
30.1	1665.01	1997.43		30.1	1800.88	1997.43		30.1	1878.73	1997.43		30.1	1974.7	1997.43
30.12	1753.11	1998.48		30.12	1734.7	1998.48		30.12	1735.05	1998.48		30.12	1981.64	1998.48
30.13	1810.88	1999.54		30.13	1790.48	1999.54		30.13	1693.72	1999.54		30.13	1935.4	1999.54
30.15	1872.79	2000.59		30.15	1872	2000.59		30.15	1858.01	2000.59		30.15	1972.32	2000.59
30.17	1849.41	2001.64		30.17	1824.1	2001.64		30.17	1863.03	2001.64		30.17	1994.98	2001.64
30.18	1655.85	2002.69		30.18	1888.79	2002.69		30.18	1849.68	2002.69		30.18	1959.54	2002.69
30.2	1817.74	2003.74		30.2	1904.62	2003.74		30.2	1863.32	2003.74		30.2	1838.25	2003.74
30.22	1820.91	2004.79		30.22	1940.5	2004.79		30.22	1879.27	2004.79		30.22	1892.71	2004.79
30.23	1802.44	2005.84		30.23	1881.37	2005.84		30.23	1954.64	2005.84		30.23	1938.53	2005.84
30.25	1906.61	2006.89		30.25	1983.3	2006.89		30.25	1840.56	2006.89		30.25	1897.19	2006.89
30.27	1729.57	2007.95		30.27	2028.08	2007.95		30.27	1880.12	2007.95		30.27	1841.44	2007.95
30.28	1844.84	2009		30.28	1921.05	2009		30.28	1748.79	2009		30.28	1893.72	2009
30.3	1794.49	2010.05		30.3	1780.16	2010.05		30.3	1836.63	2010.05		30.3	1818.87	2010.05
30.32	1865.46	2011.1		30.32	1888.67	2011.1		30.32	1830.02	2011.1		30.32	1666.84	2011.1
30.33	1858	2012.15		30.33	1665.7	2012.15		30.33	1881.36	2012.15		30.33	1711.45	2012.15
30.35	1843.8	2013.2		30.35	1753.89	2013.2		30.35	1795.2	2013.2		30.35	1717.15	2013.2
30.37	1896.19	2014.25		30.37	1796.96	2014.25		30.37	1795.35	2014.25		30.37	1867.55	2014.25
30.38	1836.54	2015.3		30.38	1836.2	2015.3		30.38	1749.51	2015.3		30.38	1876.57	2015.3
30.4	1849.81	2016.36		30.4	1836.49	2016.36		30.4	1733.17	2016.36		30.4	1799.52	2016.36
30.42	1871.56	2017.41		30.42	1867.07	2017.41		30.42	1800.69	2017.41		30.42	1888.13	2017.41
30.43	1840.62	2018.46		30.43	1880.97	2018.46		30.43	1863.01	2018.46		30.43	1831.03	2018.46
30.45	1812.01	2019.51		30.45	1789.63	2019.51		30.45	1814.16	2019.51		30.45	1991.7	2019.51
30.47	1806.44	2020.56		30.47	1915.44	2020.56		30.47	1916.76	2020.56		30.47	1849.95	2020.56
30.48	1750.81	2021.61		30.48	1843.93	2021.61		30.48	1921.37	2021.61		30.48	1887.33	2021.61
30.5	1819.36	2022.66		30.5	1828.05	2022.66		30.5	1897.57	2022.66		30.5	1903.91	2022.66
30.52	1732.09	2023.71		30.52	1801.93	2023.71		30.52	1771.01	2023.71		30.52	1899.16	2023.71
30.53	1705.91	2024.76		30.53	1748.71	2024.76		30.53	1784.81	2024.76		30.53	1816.17	2024.76
30.55	1823.61	2025.82		30.55	1719.91	2025.82		30.55	1795.88	2025.82		30.55	1903.21	2025.82
30.57	1780.53	2026.87		30.57	1722.78	2026.87		30.57	1850.2	2026.87		30.57	1865.58	2026.87
30.58	1809.57	2027.92		30.58	1681.85	2027.92		30.58	1814.73	2027.92		30.58	1743.1	2027.92
30.6	1878.1	2028.97		30.6	1745.32	2028.97		30.6	1820.82	2028.97		30.6	1810.34	2028.97
30.62	1781.16	2030.02		30.62	1811.3	2030.02		30.62	1837.48	2030.02		30.62	1762.25	2030.02
30.63	1843.93	2031.07		30.63	1885.7	2031.07		30.63	1820.68	2031.07		30.63	1689.77	2031.07
30.65	1929.21	2032.12		30.65	1760.86	2032.12		30.65	1778.48	2032.12		30.65	1836.3	2032.12
30.67	1878.16	2033.17		30.67	1833.57	2033.17		30.67	1879.28	2033.17		30.67	1627.01	2033.17
30.68	1905.58	2034.22		30.68	1947.12	2034.22		30.68	1907.96	2034.22		30.68	1664.54	2034.22
30.7	1956.78	2035.27		30.7	1802.21	2035.27		30.7	2064.84	2035.27		30.7	1728.04	2035.27
30.72	2040.64	2036.33		30.72	1831.39	2036.33		30.72	2007.5	2036.33		30.72	1675.54	2036.33
30.73	1965.61	2037.38		30.73	1772.35	2037.38		30.73	2029.38	2037.38		30.73	1734.3	2037.38
30.75	1946.93	2038.43		30.75	1806.72	2038.43		30.75	1958.26	2038.43		30.75	1883.92	2038.43
30.77	2011.52	2039.48		30.77	1851.44	2039.48		30.77	2031.36	2039.48		30.77	1696.5	2039.48
30.78	1812.6	2040.53		30.78	1815.48	2040.53		30.78	1863	2040.53		30.78	1719.31	2040.53
30.8	1753.86	2041.58		30.8	1915.19	2041.58		30.8	1941.36	2041.58		30.8	1713.17	2041.58
30.82	1775.33	2042.63		30.82	1863.74	2042.63		30.82	1913.37	2042.63		30.82	1764.95	2042.63
30.83	1819.51	2043.68		30.83	1766.71	2043.68		30.83	1849.86	2043.68		30.83	1896.12	2043.68
30.85	1864.33	2044.73		30.85	1844.62	2044.73		30.85	1854.45	2044.73		30.85	1834.78	2044.73
30.87	1735.25	2045.78		30.87	1792.03	2045.78		30.87	1871.23	2045.78		30.87	1754.38	2045.78
30.88	1754.61	2046.83		30.88	1955.68	2046.83		30.88	1716.04	2046.83		30.88	1895.66	2046.83
30.9	1754.58	2047.88		30.9	1943.59	2047.88		30.9	1791.09	2047.88		30.9	1912.1	2047.88
30.92	1724.21	2048.93		30.92	1822.2	2048.93		30.92	1726.78	2048.93		30.92	1890.28	2048.93
30.93	1768.35	2049.99		30.93	1818	2049.99		30.93	1779.12	2049.99		30.93	1922.77	2049.99
30.95	1793.28	2051.04		30.95	1813.43	2051.04		30.95	1757.5	2051.04		30.95	1790.31	2051.04
30.97	1833.01	2052.09		30.97	1861.76	2052.09		30.97	1736.47	2052.09		30.97	1882.56	2052.09
30.98	1737.41	2053.14		30.98	1840	2053.14		30.98	1773.61	2053.14		30.98	1781.63	2053.14
31	1892.55	2054.19		31	1846.31	2054.19		31	1907.44	2054.19		31	1753.5	2054.19
31.02	1831.49	2055.24		31.02	1784.92	2055.24		31.02	1967.58	2055.24		31.02	1829.76	2055.24
31.03	1790.28	2056.29		31.03	1772.71	2056.29		31.03	1897.3	2056.29		31.03	1800.63	2056.29
31.05	1865.13	2057.34		31.05	1835.57	2057.34		31.05	1880.98	2057.34		31.05	1714.59	2057.34
31.07	1853.52	2058.39		31.07	1857.23	2058.39		31.07	1788.84	2058.39		31.07	1816.13	2058.39
31.08	1861.43	2059.44		31.08	1831.06	2059.44		31.08	1642.73	2059.44		31.08	1747.31	2059.44
31.1	1887.02	2060.49		31.1	1829.97	2060.49		31.1	1699.86	2060.49		31.1	1701.03	2060.49
31.12	1849	2061.54		31.12	1906.71	2061.54		31.12	1768.24	2061.54		31.12	1705.58	2061.54
31.13	1810.89	2062.59		31.13	1907.57	2062.59		31.13	1802.13	2062.59		31.13	1714.08	2062.59
31.15	1888.23	2063.64		31.15	1847.66	2063.64		31.15	1972.28	2063.64		31.15	1723.84	2063.64
31.17	1868.36	2064.69		31.17	1934.41	2064.69		31.17	1854.02	2064.69		31.17	1650.11	2064.69
31.18	1831.22	2065.74		31.18	1946.41	2065.74		31.18	1834.07	2065.74		31.18	1776.76	2065.74
31.2	1881.19	2066.8		31.2	1876.86	2066.8		31.2	1865.07	2066.8		31.2	1904.37	2066.8
31.22	1870.11	2067.85		31.22	1911.44	2067.85		31.22	1714.32	2067.85		31.22	1890.92	2067.85
31.23	1862.7	2068.9		31.23	1833.03	2068.9		31.23	1800.27	2068.9		31.23	1847.35	2068.9
31.25	1800.18	2069.95		31.25	1767.6	2069.95		31.25	1782.47	2069.95		31.25	1937.75	2069.95
31.27	1796.21	2071		31.27	1704.77	2071		31.27	1771.49	2071		31.27	1885.48	2071
31.28	1698.47	2072.05		31.28	1787.29	2072.05		31.28	1775.75	2072.05		31.28	1891.4	2072.05
31.3	1824.01	2073.1		31.3	1783.23	2073.1		31.3	1908.31	2073.1		31.3	1773.77	2073.1
31.32	1797.58	2074.15		31.32	1691.2	2074.15		31.32	1896.48	2074.15		31.32	1837.95	2074.15
31.33	1807.71	2075.2		31.33	1781.64	2075.2		31.33	1882.63	2075.2		31.33	1963.52	2075.2
31.35	1819.89	2076.25		31.35	1806.61	2076.25		31.35	1984.3	2076.25		31.35	1803.51	2076.25
31.37	1786.12	2077.3		31.37	1973.35	2077.3		31.37	1996.16	2077.3		31.37	1864.43	2077.3
31.38	1842.88	2078.35		31.38	1815.63	2078.35		31.38	1959.78	2078.35		31.38	1922.07	2078.35
31.4	1800	2079.4		31.4	1830.74	2079.4		31.4	2078.97	2079.4		31.4	1952.87	2079.4
31.42	1770.32	2080.45		31.42	1866.59	2080.45		31.42	1834.04	2080.45		31.42	1876.15	2080.45
31.43	1810.8	2081.5		31.43	1987.36	2081.5		31.43	1955.94	2081.5		31.43	1931.4	2081.5
31.45	1743.03	2082.55		31.45	2051.28	2082.55		31.45	1869.14	2082.55		31.45	1869.44	2082.55
31.47	1899.94	2083.6		31.47	2012.16	2083.6		31.47	1946.81	2083.6		31.47	1922.17	2083.6
31.48	1841.19	2084.65		31.48	1996.5	2084.65		31.48	1988.32	2084.65		31.48	1930.93	2084.65
31.5	1868.09	2085.7		31.5	2098.14	2085.7		31.5	1818.19	2085.7		31.5	1951	2085.7
31.52	1780.32	2086.75		31.52	2051.25	2086.75		31.52	1931.41	2086.75		31.52	1973.49	2086.75
31.53	1814.31	2087.8		31.53	1945.14	2087.8		31.53	1906.96	2087.8		31.53	1904.29	2087.8
31.55	1831.9	2088.85		31.55	2046.01	2088.85		31.55	1757.31	2088.85		31.55	1895.05	2088.85
31.57	1885.49	2089.9		31.57	2006.54	2089.9		31.57	1868.11	2089.9		31.57	1906.77	2089.9
31.58	1890.86	2090.95		31.58	2098.86	2090.95		31.58	1906.28	2090.95		31.58	1945.12	2090.95
31.6	1968.05	2092		31.6	2082.76	2092		31.6	1822.96	2092		31.6	1944.37	2092
31.62	2010.34	2093.05		31.62	2176.84	2093.05		31.62	1720.17	2093.05		31.62	1938.05	2093.05
31.63	1949.41	2094.1		31.63	2263.21	2094.1		31.63	1772.09	2094.1		31.63	1779.68	2094.1
31.65	2015.18	2095.15		31.65	2151.99	2095.15		31.65	1744.93	2095.15		31.65	1883.59	2095.15
31.67	2053.57	2096.2		31.67	2097.36	2096.2		31.67	1849.12	2096.2		31.67	1850.76	2096.2
31.68	1919.98	2097.25		31.68	2051.52	2097.25		31.68	1764.07	2097.25		31.68	1831.6	2097.25
31.7	1863.38	2098.3		31.7	2074.73	2098.3		31.7	1758.15	2098.3		31.7	1815.52	2098.3
31.72	1929.07	2099.35		31.72	2113.93	2099.35		31.72	1885.82	2099.35		31.72	1843.63	2099.35
31.73	1866.6	2100.4		31.73	2060.35	2100.4		31.73	1847.6	2100.4		31.73	1862.63	2100.4
31.75	1994.85	2101.45		31.75	2070.41	2101.45		31.75	1917.06	2101.45		31.75	1852.33	2101.45
31.77	1829.2	2102.5		31.77	2146.45	2102.5		31.77	1803.93	2102.5		31.77	1741.6	2102.5
31.78	1859.77	2103.55		31.78	2030.41	2103.55		31.78	1907.12	2103.55		31.78	1860.12	2103.55
31.8	1893.76	2104.6		31.8	2141.12	2104.6		31.8	1811.35	2104.6		31.8	1920.88	2104.6
31.82	1857.66	2105.65		31.82	2136.12	2105.65		31.82	1861.71	2105.65		31.82	1990.63	2105.65
31.83	1784.69	2106.7		31.83	2020.03	2106.7		31.83	1848.94	2106.7		31.83	1906.62	2106.7
31.85	1957.85	2107.75		31.85	2039.36	2107.75		31.85	1815.55	2107.75		31.85	1972.86	2107.75
31.87	1854.42	2108.8		31.87	1889.63	2108.8		31.87	1868.1	2108.8		31.87	1846.26	2108.8
31.88	1841.3	2109.85		31.88	1988.92	2109.85		31.88	1822.35	2109.85		31.88	1909.66	2109.85
31.9	1959.04	2110.9		31.9	1981.31	2110.9		31.9	1871.62	2110.9		31.9	1792.35	2110.9
31.92	1929.45	2111.95		31.92	1983.42	2111.95		31.92	1837.16	2111.95		31.92	1884.13	2111.95
31.93	1864.31	2113		31.93	2035.74	2113		31.93	1961.68	2113		31.93	1871.75	2113
31.95	1875.58	2114.05		31.95	2014.72	2114.05		31.95	1848	2114.05		31.95	2002.83	2114.05
31.97	1843.81	2115.1		31.97	2032.46	2115.1		31.97	2049.69	2115.1		31.97	1845.55	2115.1
31.98	1821.13	2116.15		31.98	1973.43	2116.15		31.98	1942.12	2116.15		31.98	1871.92	2116.15
32	1822.48	2117.2		32	1841.09	2117.2		32	1846.86	2117.2		32	1720.44	2117.2
32.02	1866.44	2118.25		32.02	1846.02	2118.25		32.02	1773.95	2118.25		32.02	1853.48	2118.25
32.03	1839.05	2119.3		32.03	1887.72	2119.3		32.03	1881.79	2119.3		32.03	1920.62	2119.3
32.05	1852.65	2120.35		32.05	1832.53	2120.35		32.05	1770.8	2120.35		32.05	1895.57	2120.35
32.07	1934.2	2121.4		32.07	1872.03	2121.4		32.07	1897.62	2121.4		32.07	2012.71	2121.4
32.08	1899.61	2122.45		32.08	1812.15	2122.45		32.08	1844.46	2122.45		32.08	2025.26	2122.45
32.1	1953.28	2123.5		32.1	1858.59	2123.5		32.1	1871.18	2123.5		32.1	1990.84	2123.5
32.12	1988.14	2124.55		32.12	1781.56	2124.55		32.12	1893.02	2124.55		32.12	1969.78	2124.55
32.13	1905.22	2125.6		32.13	1846.79	2125.6		32.13	1961.11	2125.6		32.13	2086.63	2125.6
32.15	1842.12	2126.65		32.15	1797.74	2126.65		32.15	1907.32	2126.65		32.15	2054.97	2126.65
32.17	1892.46	2127.7		32.17	1773.77	2127.7		32.17	1904.98	2127.7		32.17	2099.37	2127.7
32.18	2006.73	2128.75		32.18	1829.84	2128.75		32.18	1922.96	2128.75		32.18	2065.12	2128.75
32.2	1880.33	2129.8		32.2	1884.15	2129.8		32.2	1902.22	2129.8		32.2	2043.81	2129.8
32.22	1869.16	2130.85		32.22	1858.78	2130.85		32.22	1986.51	2130.85		32.22	2079.59	2130.85
32.23	1827.11	2131.9		32.23	1872.16	2131.9		32.23	1978.95	2131.9		32.23	2082.49	2131.9
32.25	1813.71	2132.95		32.25	1812.25	2132.95		32.25	1941.45	2132.95		32.25	2025.54	2132.95
32.27	1922.72	2134		32.27	1821.87	2134		32.27	1958.96	2134		32.27	1987.2	2134
32.28	1899.78	2135.05		32.28	1829.84	2135.05		32.28	1941.3	2135.05		32.28	1844.67	2135.05
32.3	1866.35	2136.1		32.3	1853.43	2136.1		32.3	1911.34	2136.1		32.3	1860.53	2136.1
32.32	1913.68	2137.15		32.32	1981.47	2137.15		32.32	1875.42	2137.15		32.32	1932.42	2137.15
32.33	1797.99	2138.2		32.33	1794.82	2138.2		32.33	1951.4	2138.2		32.33	1827.83	2138.2
32.35	1888.13	2139.25		32.35	1792.55	2139.25		32.35	1912.74	2139.25		32.35	1878.05	2139.25
32.37	1985.47	2140.3		32.37	1856.36	2140.3		32.37	1966.63	2140.3		32.37	1854.38	2140.3
32.38	1934.35	2141.35		32.38	1860.81	2141.35		32.38	2127.25	2141.35		32.38	2050.59	2141.35
32.4	1921.24	2142.4		32.4	1898.15	2142.4		32.4	2000.08	2142.4		32.4	1963.25	2142.4
32.42	1913.6	2143.45		32.42	1849.96	2143.45		32.42	1973.1	2143.45		32.42	1904.84	2143.45
32.43	1859.26	2144.5		32.43	1942.92	2144.5		32.43	1960.58	2144.5		32.43	1852.35	2144.5
32.45	1887.97	2145.55		32.45	1902.19	2145.55		32.45	1906.26	2145.55		32.45	1882.75	2145.55
32.47	1888.34	2146.59		32.47	1800.3	2146.59		32.47	1918	2146.59		32.47	1760.45	2146.59
32.48	1823.01	2147.64		32.48	1894.74	2147.64		32.48	1860.44	2147.64		32.48	1757.81	2147.64
32.5	1904.26	2148.69		32.5	1867.52	2148.69		32.5	1878.34	2148.69		32.5	1895.2	2148.69
32.52	1799.74	2149.74		32.52	1864.86	2149.74		32.52	2039.71	2149.74		32.52	1915.2	2149.74
32.53	1925.96	2150.79		32.53	1838.11	2150.79		32.53	2025.48	2150.79		32.53	1974.84	2150.79
32.55	1867.49	2151.84		32.55	1854.89	2151.84		32.55	1938.7	2151.84		32.55	2001.08	2151.84
32.57	1975.88	2152.89		32.57	1927.79	2152.89		32.57	2090.81	2152.89		32.57	2010.85	2152.89
32.58	1976.59	2153.94		32.58	1961.66	2153.94		32.58	1973.57	2153.94		32.58	2022.57	2153.94
32.6	1856.81	2154.99		32.6	1944.79	2154.99		32.6	1986.31	2154.99		32.6	2017.05	2154.99
32.62	1967.49	2156.04		32.62	2016.1	2156.04		32.62	2079.12	2156.04		32.62	1987.07	2156.04
32.63	1928.94	2157.09		32.63	2125.15	2157.09		32.63	2053.98	2157.09		32.63	2014.19	2157.09
32.65	1836.58	2158.14		32.65	2101.15	2158.14		32.65	1912.07	2158.14		32.65	1921.08	2158.14
32.67	1817.42	2159.19		32.67	1995.44	2159.19		32.67	2031.76	2159.19		32.67	1987.26	2159.19
32.68	1855.21	2160.24		32.68	2087.44	2160.24		32.68	1855.91	2160.24		32.68	1909.62	2160.24
32.7	1881.37	2161.29		32.7	2013.41	2161.29		32.7	2006.22	2161.29		32.7	2003.93	2161.29
32.72	1899.22	2162.34		32.72	1940.44	2162.34		32.72	1881.97	2162.34		32.72	2049.07	2162.34
32.73	2005.81	2163.38		32.73	1994.94	2163.38		32.73	1910.33	2163.38		32.73	1998.41	2163.38
32.75	1986.33	2164.43		32.75	2001.2	2164.43		32.75	1885.46	2164.43		32.75	2087.6	2164.43
32.77	1994.32	2165.48		32.77	2059.43	2165.48		32.77	1936.07	2165.48		32.77	2080.93	2165.48
32.78	1947.32	2166.53		32.78	2088.47	2166.53		32.78	1887.27	2166.53		32.78	2292.59	2166.53
32.8	1957.5	2167.58		32.8	2182.02	2167.58		32.8	1846.35	2167.58		32.8	2108.07	2167.58
32.82	1923.67	2168.63		32.82	1970.06	2168.63		32.82	2030.33	2168.63		32.82	1978.67	2168.63
32.83	1947.54	2169.68		32.83	2007.18	2169.68		32.83	1959.87	2169.68		32.83	2073.29	2169.68
32.85	1860.13	2170.73		32.85	1931.4	2170.73		32.85	1927.72	2170.73		32.85	1933.98	2170.73
32.87	1908.71	2171.78		32.87	1881.98	2171.78		32.87	1857.71	2171.78		32.87	1896.17	2171.78
32.88	1990.96	2172.83		32.88	1941.32	2172.83		32.88	1989.28	2172.83		32.88	1974.26	2172.83
32.9	2073.7	2173.88		32.9	1860.85	2173.88		32.9	1824.76	2173.88		32.9	1974.16	2173.88
32.92	1925.14	2174.93		32.92	1901.23	2174.93		32.92	2110.97	2174.93		32.92	1906.08	2174.93
32.93	1847.98	2175.98		32.93	1917.24	2175.98		32.93	2184.2	2175.98		32.93	1955.54	2175.98
32.95	1892.35	2177.02		32.95	1956.97	2177.02		32.95	2127.71	2177.02		32.95	1998.36	2177.02
32.97	1783.75	2178.07		32.97	1943.65	2178.07		32.97	2283.97	2178.07		32.97	1976.66	2178.07
32.98	1921.61	2179.12		32.98	1915.71	2179.12		32.98	2151.02	2179.12		32.98	1820.98	2179.12
33	1955.15	2180.17		33	1991.41	2180.17		33	2244.45	2180.17		33	1882.19	2180.17
33.02	1969.41	2181.22		33.02	2152.29	2181.22		33.02	2157.09	2181.22		33.02	1890.86	2181.22
33.03	2007.49	2182.27		33.03	2021.77	2182.27		33.03	2111.11	2182.27		33.03	1962.03	2182.27
33.05	1917.47	2183.32		33.05	2052.31	2183.32		33.05	2085.74	2183.32		33.05	1941.83	2183.32
33.07	2026.27	2184.37		33.07	1942.8	2184.37		33.07	2126.48	2184.37		33.07	2045.12	2184.37
33.08	1961.54	2185.42		33.08	1943.23	2185.42		33.08	2147.63	2185.42		33.08	1890.58	2185.42
33.1	1878.85	2186.47		33.1	1994.2	2186.47		33.1	2151.29	2186.47		33.1	1900.4	2186.47
33.12	1886.51	2187.52		33.12	1911.06	2187.52		33.12	2132.76	2187.52		33.12	1834.55	2187.52
33.13	1965.46	2188.56		33.13	2008.36	2188.56		33.13	2139.56	2188.56		33.13	1911.73	2188.56
33.15	1998.24	2189.61		33.15	2028.79	2189.61		33.15	2169.98	2189.61		33.15	1935.84	2189.61
33.17	2018.62	2190.66		33.17	2062.4	2190.66		33.17	2114.98	2190.66		33.17	1813.96	2190.66
33.18	1982.92	2191.71		33.18	1981.13	2191.71		33.18	2074.51	2191.71		33.18	1913.77	2191.71
33.2	2112.97	2192.76		33.2	1961.5	2192.76		33.2	2009.88	2192.76		33.2	1872.1	2192.76
33.22	2126.04	2193.81		33.22	1906.83	2193.81		33.22	2072.41	2193.81		33.22	1960.63	2193.81
33.23	1992.52	2194.86		33.23	1832.21	2194.86		33.23	1993.95	2194.86		33.23	1983.83	2194.86
33.25	2011.8	2195.91		33.25	1858.24	2195.91		33.25	2071.51	2195.91		33.25	1892.15	2195.91
33.27	1973.24	2196.96		33.27	1957.94	2196.96		33.27	2005.58	2196.96		33.27	1992.43	2196.96
33.28	2148.21	2198		33.28	1897.57	2198		33.28	2018.96	2198		33.28	2034.67	2198
[truncated: 163 more rows]
