# Supplementary material for: The sleep-wake distribution contributes to the peripheral rhythms in PERIOD-2
Source: eLife. 2021 Dec 13;10:e69773. doi: 10.7554/eLife.69773 (PMC8798053; doi:10.7554/eLife.69773)
Supplement: Figure 2—figure supplement 2—source data 1. [file elife-69773-fig2-figsupp2-data1.xlsx]

## Sheet: C
The individual traces across the experiment Panels A and B are in the Figure 2 Source data
		REC1	REC2	REC3
	A9737	0.2963	0.2793	0.06767
	A9739	0.2138	0.0691	0.1453
	A9740	0.4584	0.2682	0.09099
	A9742	0.2943	0.04879	0.0943
