# Supplementary material for: The sleep-wake distribution contributes to the peripheral rhythms in PERIOD-2
Source: eLife. 2021 Dec 13;10:e69773. doi: 10.7554/eLife.69773 (PMC8798053; doi:10.7554/eLife.69773)
Supplement: Figure 2—source data 1. [file elife-69773-fig2-data1.xlsx]

## Sheet: A
	Intact				SCNx-BSL1
Time[hrs]	A9737	A9737	A9737	A9737	A9737	A9737	A9737	A9737
12.25	0.82038	0.92686	0.86196	0.94343	1.1023	0.88996	0.8817	0.74028
12.75	0.92765	1.0696	0.95039	0.89245	1.0534	0.86201	0.82987	0.81897
13.25	0.91543	1.1185	1.0831	1.0546	1.1609	0.94291	1.1122	0.71707
13.75	0.99731	0.99502	0.96712	1.0869	1.0829	1.0754	1.0979	0.77361
14.25	0.82784	0.97626	0.92918	1.0237	1.1	1.0161	1.2598	0.80596
14.75	0.87349	0.88551	1.0352	1.1535	1.009	0.94219	1.1362	0.84111
15.25	0.94971	1.1703	1.0014	1.0346	1.1313	0.96549	1.0678	0.94681
15.75	1.1659	1.1197	1.1409	1.1269	1.2242	0.9623	1.0121	0.97568
16.25	0.95242	1.2553	1.1219	1.1135	1.0097	1.0007	1.1015	1.0489
16.75	0.90639	1.6345	1.1799	1.0834	0.97319	1.0147	1.1246	1.0247
17.25	1.0457	1.1645	1.2011	1.071	0.98664	0.96257	1.3066	1.1953
17.75	1.0667	1.088	1.3233	1.2695	1.0373	0.95353	1.0073	1.2903
18.25	1.1974	1.2261	1.152	1.2697	0.9527	0.93258	1.0945	1.2581
18.75	1.0675	1.1793	1.1252	1.2175	1.0837	0.95379	1.388	1.2543
19.25	1.3773	1.1158	1.1795	1.335	1.0256	0.97059	1.0375	1.2759
19.75	1.5531	1.1089	1.2776	1.1778	1.0388	1.1869	0.87564	1.2964
20.25	1.3159	1.3046	1.299	1.2108	1.1561	1.0572	0.92449	1.1916
20.75	1.1322	1.2502	1.223	1.2883	1.1438	1.0425	0.95011	1.1452
21.25	1.6739	1.5034	1.1197	1.2682	1.1294	1.0503	0.81674	1.2006
21.75	1.2148	1.0691	1.2561	1.1567	0.88861	1.0747	0.8387	1.2203
22.25	1.182	1.2041	1.1501	1.2715	1.0127	1.1207	0.87601	1.3983
22.75	1.2318	1.1854	0.99595	1.0931	0.95193	1.173	0.84231	1.345
23.25	1.335	1.0129	1.0343	1.1455	0.84051	1.1357	0.95054	1.2333
23.75	1.0643	0.94177	1.0131	1.1075	1.0331	1.0641	0.86593	1.1619
24.25	1.0742	0.97958	0.92849	1.108	0.82537	1.0503	0.85014	1.1968
24.75	1.4128	1.1744	0.90205	1.3755	0.90934	1.0279	0.94142	1.0417
25.25	1.0488	1.0691	0.96233	1.2716	0.87564	0.96552	0.94945	0.94836
25.75	0.91133	1.0213	0.79673	0.97842	0.8166	1.0158	0.82966	0.96642
26.25	1.0421	0.85801	0.74401	1.1831	0.92957	0.90519	1.0032	0.8958
26.75	1.1977	0.86226	0.5901	1.0809	0.9502	1.0339	1.0464	0.86328
27.25	0.92376	1.0126	0.59468	0.97558	0.8547	0.93984	0.80395	0.84951
27.75	0.82075	0.89975	0.6275	0.8927	0.7704	0.92731	0.82783	0.81929
28.25	0.8003	0.70844	0.74982	0.96534	0.64725	0.91623	0.85759	0.81924
28.75	0.98787	0.74945	0.71093	0.85345	0.87482	0.92483	1.0012	0.73246
29.25	0.78562	0.67058	0.60987	0.76353	0.8772	0.89259	0.82301	0.83307
29.75	0.65728	0.65022	0.61683	0.77867	0.88059	0.92743	0.91705	0.71835
30.25	0.62004	0.52574	0.64665	0.84325	0.80349	0.92219	1.091	0.69681
30.75	0.7083	0.58359	0.65942	0.68727	0.8993	0.904	0.86808	0.60828
31.25	0.54045	0.56607	0.68671	0.64929	1.0672	0.89391	1.0554	0.64739
31.75	0.5648	0.61667	0.5753	0.69519	0.9989	1.1092	1.1639	0.68041
32.25	0.55877	0.63704	0.56503	0.7665	0.89001	0.97718	1.0032	0.72304
32.75	0.59189	0.83996	0.68334	0.78349	0.8786	1.0735	0.92449	0.79884
33.25	0.58033	0.58321	0.67575	0.65676	0.90585	1.0473	1.0297	0.91147
33.75	0.59333	0.66518	0.64591	0.736	0.86478	1.0652	0.99346	0.92069
34.25	0.65567	0.74594	0.65734	0.73542	0.94976	0.99299	0.87799	0.90813
34.75	0.85102	0.74269	0.68948	0.93443	0.97566	1.0433	0.96095	0.87514
35.25	0.8014	0.8526	0.70499	0.7812	1.0958	0.96722	1.048	0.88716
35.75	0.82649	0.83447	0.75741	0.71292	1.0892	1.0082	1.0556	0.88597
36.25	0.91518	0.7428	0.72236	0.73299	1.3461	0.94014	1.1621	0.99206
36.75	0.90225	0.76594	0.85938	0.77061	1.2101	1.0218	1.2237	0.99298
37.25	1.0781	0.86679	0.94341	0.84035	1.0796	1.0172	1.1065	0.89334
37.75	1.1198	1.0264	1.0531	1.0361	1.2072	0.94709	1.1561	1.0288
38.25	1.2153	0.99816	1.2449	0.89757	0.98182	1.0348	1.1496	0.9307
38.75	1.0954	1.0356	1.2199	0.96598	1.2786	1.0115	1.0562	1.3708
39.25	1.0454	1.1006	1.207	0.99422	1.2878	0.93325	1.1445	1.0013
39.75	1.3201	1.1204	1.1055	0.98275	1.1703	1.047	1.198	1.0511
40.25	1.2027	1.1347	1.0559	1.0856	1.2963	1.0324	1.0158	1.0983
40.75	1.1071	1.3016	1.1665	1.0695	1.2083	1.0407	0.95362	1.192
41.25	1.3286	1.2372	1.4241	1.1659	1.0856	0.98493	1.2889	1.2089
41.75	1.5246	1.2376	1.3031	1.179	1.2985	0.99331	1.1429	1.2533
42.25	1.5663	1.2618	1.5625	1.1079	1.1032	0.99231	1.1299	1.1852
42.75	1.1466	1.3075	1.3218	1.3892	1.0357	0.9729	1.0317	1.1376
43.25	1.032	1.4093	1.7292	1.2884	0.94943	0.96214	0.95653	1.0626
43.75	1.4077	1.2533	1.5904	1.2056	1.0335	0.99075	1.1002	1.103
44.25	1.5185	1.5553	1.6185	1.1081	0.94696	1.0637	0.96182	1.067
44.75	1.4134	1.1883	1.4743	1.1768	0.81081	1.0178	0.92359	1.1456
45.25	1.2441	1.1071	1.7891	1.1688	0.7698	0.9752	0.86152	1.2287
45.75	1.1597	1.2498	1.64	1.2588	0.82441	1.0725	0.77991	1.1751
46.25	1.2095	1.1168	1.4919	1.0374	0.90842	1.0327	0.84012	1.1917
46.75	1.2914	1.0422	1.3866	1.2173	0.8888	0.98072	0.70673	1.0048
47.25	1.0626	1.0132	1.4191	1.2661	0.92018	1.0726	0.8779	1.1057
47.75	1.0866	1.0809	1.6208	1.066	0.95407	1.0895	0.84435	1.2831
48.25	1.151	0.9658	1.5694	1.2625	0.9056	0.99627	0.78705	1.3315
48.75	1.1032	0.96093	1.3812	1.1835	0.99551	0.99626	0.81291	1.1436
49.25	1.2129	1.0555	1.2436	1.4859	1.0651	1.0545	0.94883	1.0195
49.75	0.98309	0.97701	0.99822	1.2646	1.1869	1.0123	0.76465	1.3162
50.25	1.0753	0.90194	0.83853	1.1113	1.0339	1.0203	0.87453	1.161
50.75	0.8272	0.99978	0.94664	0.90877	1.015	0.92465	1.045	0.92665
51.25	0.77121	0.89576	1.0094	1.0815	1.0073	1.018	1.0968	0.83348
51.75	0.82727	0.93893	0.88565	0.97365	1.1685	0.98542	0.80703	0.84141
52.25	0.6913	0.87553	0.75861	0.92254	0.89091	1.0176	0.96474	0.75174
52.75	0.70051	0.8669	0.72489	0.82807	0.92807	0.91008	1.0593	0.71853
53.25	0.67224	0.8201	0.71603	0.95321	0.93251	0.91133	0.95506	0.73539
53.75	0.63343	0.80907	0.76023	0.84033	0.86305	0.98334	0.8914	0.7553
54.25	0.60914	0.61488	0.714	0.67849	0.91374	0.88074	1.0734	0.71435
54.75	0.71469	0.61799	0.7321	0.75169	1.0266	0.91667	0.7718	0.67961
55.25	0.62803	0.61901	0.69916	0.63517	1.0273	0.88495	0.9234	0.82614
55.75	0.56086	0.63385	0.64146	0.56192	0.79557	0.93125	1.0138	0.81287
56.25	0.61585	0.70155	0.64457	0.48818	0.88132	0.92615	1.0819	0.8607
56.75	0.56682	0.75202	0.61259	0.55867	0.92386	0.98401	0.87977	0.81922
57.25	0.54795	0.72725	0.57863	0.72327	1.1253	0.99782	1.0536	0.83122
57.75	0.61839	0.71609	0.63416	0.72346	1.0218	1.0001	0.99382	0.97801
58.25	0.77133	0.69012	0.60795	0.69844	1.0511	0.95771	0.88019	0.93713
58.75	0.87753	0.67312	0.72156	0.67045	0.96526	1.1229	1.0689	0.95343
59.25	0.96585	0.80795	0.68042	0.58755	0.98948	0.99407	0.9833	1.0719
59.75	0.94274	0.86029	0.77461	0.72218	0.92907	1.0694	0.97101	1.0657
60.25	0.90005	0.82896	0.81962	0.65706	1.089	1.054	1.0868	1.0526
60.75	0.92494	0.82537	0.89476	0.71818	1.0393	1.0646	1.0464	1.2237
61.25	0.94065	0.79173	0.82604	0.68799	1.0497	1.0657	1.2089	1.101
61.75	1.0392	0.94647	0.89238	0.76821	1.0445	1.0185	0.92626	1.303
62.25	0.93934	0.89289	0.91838	0.74895	1.0184	1.1635	0.93129	1.1889
62.75	0.98629	1.0833	1.0892	0.83617	0.95898	1.0724	1.0205	0.96417
63.25	1.1321	1.0766	0.94651	0.79761	1.0606	1.0518	1.2731	1.0063
63.75	1.1453	1.3188	1.1193	0.9748	1.0536	1.1413	0.92207	1.3742
64.25	1.2344	1.1695	1.2122	1.1725	0.98612	1.08	1.0879	1.2619
64.75	1.196	1.0798	1.2358	1.0535	0.96606	1.0506	1.2327	1.2221
65.25	1.172	1.0696	1.2395	1.0732	0.96658	0.98392	1.038	1.1535
65.75	1.2557	1.1413	1.3077	1.0331	1.0951	1.0769	1.2552	1.3114
66.25	1.2728	1.0445	1.201	1.2351	1.3238	1.0326	1.0856	1.1939
66.75	1.1893	1.2236	1.2812	1.2281	1.2	1.0384	1.1915	0.99444
67.25	1.0599	1.3533	1.4726	1.1477	1.1315	1.0633	1.1102	1.067
67.75	1.152	1.0941	1.2506	1.091	1.0198	1.0996	1.0446	1.1082
68.25	1.2078	1.2789	1.299	1.1725	1.0999	0.99166	1.4557	0.96033
68.75	1.302	1.3898	1.1461	1.1521	1.1391	1.0563	0.8977	0.95106
69.25	1.2171	1.382	1.1991	1.0001	0.92845	1.123	0.86443	1.0273
69.75	1.148	1.2504	1.2232	1.2026	0.94201	1.0744	1.1661	0.87885
70.25	1.2001	1.3112	1.2705	1.2455	1.0229	1.0018	1.0402	0.83963
70.75	1.1965	1.1985	1.32	1.1325	0.94695	1.0412	0.92371	0.84175
71.25	1.2003	1.2031	1.1855	0.94649	0.82666	0.94133	1.1436	0.83253
71.75	1.251	1.0549	1.1217	1.1518	0.94012	1.1161	1.1091	0.7758

## Sheet: B
	BSL2				SD				REC
	A9737	A9737	A9737	A9737	A9737	A9737	A9737	A9737	A9737	A9737	A9737	A9737
12.25	1.19422	0.694297	0.786804	0.44944
12.75	0.706251	0.537513	1.05434	0.446398
13.25	1.60974	0.972965	1.02649	0.820051
13.75	1.39651	1.59071	0.91684	0.61859
14.25	0.830123	1.13351	0.711719	0.687577
14.75	1.38276	1.91847	0.930558	0.981735
15.25	1.12971	0.958555	0.813873	0.697024
15.75	1.04199	2.04396	1.05113	0.827531
16.25	1.1287	1.92298	0.926028	0.625351
16.75	3.47613	1.12902	0.664007	0.681637
17.25	1.4247	1.01472	1.16217	1.19562
17.75	0.9061	0.768614	1.1552	1.52702
18.25	2.05604	0.811375	0.824672	1.43776
18.75	1.3456	2.29745	1.02256	0.976953
19.25	0.771629	1.64574	0.707083	1.10164
19.75	0.983488	1.12807	0.885874	1.11141
20.25	0.766373	1.68901	0.842187	1.65908
20.75	0.657052	2.05668	1.05559	0.989981
21.25	1.77999	1.26858	0.815004	1.07218
21.75	0.990068	0.710558	0.887894	1.57575
22.25	0.661348	0.738285	0.667655	1.46247
22.75	0.525221	1.73239	0.847044	0.919126
23.25	1.05837	1.10571	0.836998	1.40348
23.75	1.75656	0.692736	0.603904	1.08289
24.25	0.714958	1.66519	0.780993	0.746112
24.75	0.571289	0.946951	0.851238	0.816127
25.25	0.560298	0.978692	0.748759	1.15621
25.75	0.983824	0.912973	0.816752	0.889137
26.25	0.807481	0.638461	0.713723	0.638014
26.75	0.641459	0.978623	0.761951	0.949218
27.25	1.92488	1.244	0.780518	0.739568
27.75	1.15274	0.843059	0.762657	0.892657
28.25	0.593977	1.46272	0.846014	0.684687
28.75	0.761381	2.46088	0.802379	0.646296
29.25	0.613356	1.22365	0.750033	0.756866
29.75	0.482294	0.681708	0.691349	0.874608
30.25	0.712719	0.383087	0.976031	1.049
30.75	1.15296	0.406624	0.880415	0.599902
31.25	0.69751	0.313518	0.815617	0.789534
31.75	0.814452	0.281474	0.862797	0.958713
32.25	1.34882	0.714916	0.964766	0.916284
32.75	1.56833	1.0372	0.947932	0.614309
33.25	0.839118	0.663039	1.01858	0.711788
33.75	1.01476	1.25045	0.827818	0.984038
34.25	1.0772	1.13136	0.838234	1.3014
34.75	0.876735	0.966516	0.843265	1.12933
35.25	1.6202	0.838015	0.731682	0.645364
35.75	2.4341	0.703001	0.766227	0.804681
36.25	1.59269	1.54159	0.812176	0.852289
36.75	0.923409	1.99698	1.10646	0.975579
37.25	0.737682	0.975384	0.929873	1.5793
37.75	0.765592	0.667487	1.01395	0.671185
38.25	0.75131	0.743876	1.09583	0.9041
38.75	0.752916	0.659085	0.868039	0.775364
39.25	1.49574	0.677294	0.801177	1.09015
39.75	1.80608	0.788001	1.1708	0.934537
40.25	1.22529	1.32048	0.972783	1.67292
40.75	1.13463	2.23563	0.790219	1.01693
41.25	0.985174	2.36392	1.00707	0.798007
41.75	1.06528	1.23414	0.826102	0.973394
42.25	1.51506	1.04826	0.99297	1.224
42.75	1.37926	1.02274	1.07257	1.10783
43.25	1.71226	0.773917	0.767956	1.2383
43.75	1.32613	1.39332	0.797445	1.09335
44.25	1.73212	1.25695	0.834499	1.31602
44.75	2.42511	1.16722	0.952618	1.22585
45.25	1.06913	0.862011	0.840732	0.896309
45.75	0.682375	1.11101	0.812168	1.53601
46.25	0.694392	2.78976	0.85664	1.22905
46.75	1.02774	1.88608	0.913699	0.952629
47.25	1.11966	0.876014	0.802153	1.06478
47.75	0.707405	0.750258	0.802423	1.16456
48.25	0.711897	0.488306	0.76245	1.38913
48.75	0.783889	0.391522	0.734468	1.50427
49.25	0.799466	0.546141	0.680184	1.25404
49.75	1.30387	0.414575	0.734551	1.15969
50.25	1.29229	0.371032	0.930132	1.19026
50.75	0.895443	0.830329	0.933109	1.30087
51.25	0.637378	1.65858	0.962253	1.04185
51.75	0.620417	1.39864	0.888796	1.0146
52.25	1.17372	0.767442	1.00456	1.17735
52.75	1.25868	0.490361	1.04165	1.03288
53.25	1.08528	0.377488	1.22984	0.988923
53.75	0.623241	0.499999	0.999776	0.505492
54.25	0.546208	0.845795	1.26423	0.405101
54.75	0.560776	0.868878	1.14998	0.525417
55.25	0.800432	2.07101	1.19608	0.733283
55.75	0.9623	1.53581	1.32169	0.696473
56.25	0.819064	0.802277	1.04672	0.543557
56.75	0.695576	0.503114	0.991428	0.691714
57.25	0.675715	0.432839	1.18436	0.677265
57.75	1.52614	0.357873	1.28091	0.778628
58.25	1.40593	0.377632	0.954414	0.547725
58.75	0.991005	0.654969	1.0866	0.600961
59.25	0.71572	0.645414	1.24668	0.879093
59.75	0.610957	0.82577	1.02525	0.927618
60.25	1.29254	0.794285	1.02272	0.893362
60.75	1.20742	1.02984	1.12115	0.877169
61.25	1.34759	1.89985	0.905374	1.29284
61.75	1.40546	1.50362	0.940432	0.731362
62.25	0.823572	3.64594	1.04289	0.813562
62.75	0.757899	1.95591	1.33797	0.943461
63.25	1.16866	0.913583	1.29694	0.861061
63.75	0.785401	0.913092	1.32291	1.0164
64.25	0.790775	1.08175	1.13389	1.11918
64.75	1.56345	0.771022	1.20863	1.02665
65.25	1.29027	0.661862	1.1908	1.02171
65.75	1.00858	1.92418	1.04076	1.07429
66.25	1.93019	2.48889	1.0012	1.16288
66.75	1.23031	1.5958	0.817768	1.26396
67.25	0.865899	0.748136	1.09362	1.20866
67.75	0.881035	0.719846	1.05193	1.08495
68.25	0.730276	0.738444	1.09397	1.28942
68.75	0.757164	0.473946	0.835288	1.43911
69.25	1.65714	0.617814	0.838947	1.16739
69.75	1.28412	1.13075	0.922864	1.08998
70.25	1.34852	1.07395	1.05177	1.15697
70.75	0.821076	0.724068	1.08997	0.799998
71.25	0.63114	1.21283	0.954867	0.845095
71.75
72.25
72.75
73.25
73.75
74.25
74.75
75.25
75.75					1.49586	0.556356	1.05219	0.736328
76.25					1.02894	0.422196	0.91948	0.593575
76.75					0.730323	0.305587	1.01977	0.61518
77.25					0.684292	0.263961	1.18446	0.585015
77.75					0.64192	0.29444	1.31062	0.712202
78.25					0.690794	0.414676	1.13175	1.20255
78.75					0.706573	0.539108	1.42976	1.02126
79.25					0.698825	0.542118	1.81251	1.12734
79.75					0.788391	0.807127	1.69077	1.17639
80.25					0.754816	1.69337	1.6176	1.1586
80.75					1.50793	1.02276	1.76702	1.29522
81.25					1.28676	0.92835	1.70568	1.28601
81.75					0.933456	0.906248	1.62052	0.942989
82.25					0.94127	1.02628	1.11029	1.10423
82.75					1.46019	1.42255	1.15455	1.15198
83.25					1.11349	1.66934	1.41182	1.04598
83.75					0.993098	1.38112	1.45627	0.882689
84.25					1.35012	1.91462	1.23263	0.926202
84.75					1.40567	1.46999	1.12243	1.41274
85.25					0.842392	1.00941	1.27025	0.821529
85.75					0.703035	0.947177	1.12685	0.908074
86.25					0.757305	2.11041	1.11618	0.830484
86.75					0.6755	1.1927	0.922851	0.831925
87.25					0.672609	0.852006	0.736473	0.850285
87.75					0.723177	0.960296	0.700482	0.840828
88.25					0.712566	0.94823	0.70062	0.780789
88.75					1.17261	0.744587	0.742975	0.78943
89.25					0.832447	0.792859	0.61981	0.706423
89.75					0.655805	0.959176	0.66908	0.817485
90.25					0.676637	1.08808	0.639553	0.789707
90.75					0.800614	0.893826	0.612289	0.852875
91.25					0.575956	1.13856	0.485143	0.616765
91.75					0.546791	1.38594	0.617369	0.766479
92.25					0.963789	1.05659	0.537029	0.740008
92.75					0.973512	0.885929	0.657443	0.731945
93.25					0.532184	0.897361	0.702511	0.823931
93.75					0.503668	0.878058	0.785313	0.781061
94.25					0.725975	0.785424	0.737828	0.6831
94.75					0.700113	0.685676	0.719029	0.771222
95.25
95.75
96.25
96.75
97.25
97.75
98.25
98.75
99.25
99.75					0.82713	1.06241	1.05165	0.950644
100.25					0.850471	0.767768	1.26104	0.851015
100.75					0.696187	0.484093	1.04089	0.816807
101.25					0.681245	0.39035	1.12216	1.03803
101.75					0.666199	0.36107	0.932366	1.11884
102.25					0.787716	0.372749	1.27593	1.09167
102.75					0.865795	0.419235	1.64105	1.0996
103.25					1.28167	0.554087	1.69432	0.980471
103.75					1.3912	1.03881	1.57592	1.46369
104.25					1.66051	0.800152	1.56824	1.29681
104.75					1.1921	1.2287	1.58524	1.64606
105.25					1.35558	1.04279	1.6022	1.77977
105.75					2.11105	1.22337	1.52782	1.54259
106.25					1.49626	1.91303	1.63719	1.1493
106.75					0.916173	1.11449	1.65783	1.35155
107.25					0.881784	0.930205	1.746	1.60548
107.75					0.916111	0.956282	1.88648	1.05205
108.25					0.936851	1.28945	1.60542	1.22879
108.75					1.23749	1.56834	1.31073	1.06737
109.25					1.88919	0.911741	1.14658	0.952743
109.75					0.80298	0.873285	1.02474	0.868433
110.25					0.604389	1.34727	1.20955	1.0864
110.75					0.527747	0.878562	1.02002	0.916115
111.25					0.548248	1.28217	0.932034	0.889874
111.75					0.638354	0.812511	0.975317	1.04023
112.25					0.591381	0.545608	0.732662	0.901462
112.75					0.645296	0.555543	0.736703	0.893526
113.25					0.557324	0.445818	0.723599	0.911843
113.75					0.482872	0.506878	0.609784	0.874457
114.25					0.568078	0.668409	0.605224	0.856954
114.75					0.678162	0.607275	0.631822	1.03165
115.25					0.685352	0.70082	0.535729	0.823166
115.75					0.561986	0.769978	0.574014	1.00485
116.25					0.466026	0.886578	0.608721	0.905795
116.75					0.44901	0.684231	0.587916	0.951253
117.25					0.505903	0.600408	0.557503	1.00947
117.75					0.69708	0.58714	0.598958	1.02034
118.25					0.589098	0.690939	0.656153	0.968961
118.75					0.713491	0.555837	0.561224	0.976372
119.25
119.75
120.25
120.75
121.25
121.75
122.25
122.75
123.25
123.75					0.8922	0.659442	1.15748	1.06845
124.25					0.717234	0.546458	1.07895	1.05216
124.75					0.623164	0.433338	1.15318	1.12686
125.25					0.788164	0.450309	1.21585	1.26323
125.75					0.932401	0.584312	1.25896	1.46417
126.25					1.19683	0.590116	1.46599	1.33604
126.75					1.1259	1.1454	1.35934	1.6544
127.25					1.40686	1.25777	1.31835	1.69683
127.75					1.053	1.04815	1.57905	1.98125
128.25					1.35388	1.01589	1.59625	1.69082
128.75					1.13536	1.3819	1.69261	1.49607
129.25					1.16758	1.14361	1.71708	1.63238
129.75					1.18667	1.12097	1.46982	1.28899
130.25					0.948567	1.44273	1.4331	1.27783
130.75					1.30032	0.999996	1.52721	1.45986
131.25					0.808589	0.979232	1.4655	1.27136
131.75					0.879069	1.03412	1.58148	1.27533
132.25					0.876454	0.860211	1.14062	1.18455
132.75					0.845502	0.809879	1.0776	1.00017
133.25					0.781352	0.957821	1.29896	1.13364
133.75					0.734551	0.701243	0.996119	1.05709
134.25					1.03528	0.680072	1.01622	1.11985
134.75					0.635552	0.731155	0.936336	0.911098
135.25					0.52926	1.2762	0.84631	0.904465
135.75					0.549988	0.742497	0.913255	0.858417
136.25					0.555502	0.72937	0.71036	0.784775
136.75					0.549968	0.986193	0.678544	0.958676
137.25					0.540183	0.722283	0.632364	1.07781
137.75					0.660502	0.853917	0.564585	0.958472
138.25					0.572518	0.774154	0.547887	0.946791
138.75					0.55445	0.595641	0.516432	0.85109
139.25					0.571905	0.537294	0.575922	0.882581
139.75					0.639749	0.586214	0.46379	0.911375
140.25					0.517582	0.502414	0.520105	0.837415
140.75					0.454716	0.517977	0.608648	0.902779
141.25					0.591136	0.60112	0.600536	0.758402
141.75					0.592442	0.55294	0.68383	0.909478
142.25					0.579016	0.479376	0.704571	0.818885
142.75					0.562368	0.508058	0.677584	0.871099
143.25
143.75
144.25
144.75
145.25
145.75
146.25
146.75
147.25
147.75									0.865375	0.515123	1.05237	1.05047
148.25									0.60832	0.500176	0.934085	1.02925
148.75									0.607497	0.458891	1.11165	1.02889
149.25									1.14373	0.53304	1.30361	1.2045
149.75									1.19572	0.637965	1.68105	1.31622
150.25									1.20679	0.807482	1.56801	1.30422
150.75									1.30845	0.932993	1.64094	1.44921
151.25									1.09211	1.3668	1.68808	1.68508
151.75									0.996845	1.1479	1.59222	1.69193
152.25									1.41024	1.20766	1.70953	1.49498
152.75									1.29642	1.1758	1.4624	1.48565
153.25									1.17764	1.38334	1.50337	1.34958
153.75									0.700775	1.22938	1.49253	1.07421
154.25									1.34581	1.06461	1.55085	1.15119
154.75									0.992718	1.35168	1.2349	1.25849
155.25									0.941806	1.04435	1.30927	1.14459
155.75									1.15354	1.22629	1.44554	1.20108
156.25									0.817671	0.851947	1.19542	0.961126
156.75									0.772516	0.929721	1.11914	0.949434
157.25									0.798658	1.20473	1.24215	0.918994
157.75									0.754597	0.807907	1.16315	0.861671
158.25									0.643453	0.783955	1.04871	0.960552
158.75									0.668512	1.03368	0.912856	1.02329
159.25									0.642932	0.733121	0.90158	0.850788
159.75									0.584024	0.661426	0.766539	0.867107
160.25									0.631406	0.635257	0.659001	0.875188
160.75									0.613117	0.761581	0.694897	0.790731
161.25									0.498077	0.839568	0.716308	0.843104
161.75									0.547495	0.708773	0.63129	0.759533
162.25									0.516305	0.711565	0.603916	0.863664
162.75									0.505872	0.806471	0.674889	0.880377
163.25									0.63796	0.629084	0.580274	0.826064
163.75									0.597973	0.689949	0.634206	0.751905
164.25									0.629633	0.712761	0.660688	0.720295
164.75									0.599612	0.690335	0.692368	0.777331
165.25									0.650639	0.863878	0.683574	0.760903
165.75									0.618287	0.700386	0.67421	0.842703
166.25									0.728059	0.653037	0.690284	0.808812
166.75									0.748787	0.623722	0.825266	0.880051
167.25									0.723856	0.651301	0.919351	0.892644
167.75									0.91579	0.855654	0.934848	0.794044
168.25									1.03241	0.664081	1.04374	0.802666
168.75									1.03339	0.696116	0.88416	0.886419
169.25									1.19521	0.888977	0.950062	0.901229
169.75									0.922505	0.783448	1.12392	0.973349
170.25									1.16252	0.817717	1.16538	1.06228
170.75									1.01578	1.10158	1.2708	0.963677
171.25									1.40375	0.950769	1.3244	0.890618
171.75									1.30624	0.985404	1.21452	1.12204
172.25									1.17149	0.834424	1.18175	1.09474
172.75									1.28018	0.871433	1.31492	1.03559
173.25									1.32858	1.22241	1.48722	1.10665
173.75									1.43714	0.996819	1.58159	0.957931
174.25									1.43023	0.881206	1.21583	0.982523
174.75									1.14348	0.88467	1.28828	1.18911
175.25									1.52497	1.11316	1.32703	1.08089
175.75									1.51843	0.938244	1.19123	1.10271
176.25									1.5001	0.887724	1.3535	1.078
176.75									1.47035	0.860636	1.19671	1.06354
177.25									1.36562	0.88564	1.18499	1.06395
177.75									1.20464	1.0988	1.22228	0.904147
178.25									1.21468	1.20234	1.13033	0.961465
178.75									1.23624	1.26147	1.15049	0.942603
179.25									1.21069	1.10123	1.10031	0.972267
179.75									1.23472	1.06529	1.07788	1.02615
180.25									1.14384	0.999345	1.0592	0.978938
180.75									0.918443	1.05839	1.04888	0.90947
181.25									0.941349	1.19574	0.86592	0.944967
181.75									1.03318	1.06209	1.08146	0.968344
182.25									0.921839	0.957242	0.838736	0.953629
182.75									0.993647	1.28479	0.92291	0.991625
183.25									0.892518	1.00557	0.850836	1.02607
183.75									0.946689	1.00655	0.84154	1.12479
184.25									0.949163	0.900547	0.939721	1.09933
184.75									0.847336	1.15208	0.80642	0.970891
185.25									0.859726	0.909926	0.792671	0.996749
185.75									0.871382	0.989539	0.859469	0.990076
186.25									0.888581	0.918109	0.813572	0.973629
186.75									0.861422	0.906109	0.777481	1.00479
187.25									0.808681	1.23236	0.800433	1.04011
187.75									0.844274	1.10619	0.771403	0.864484
188.25									0.847776	0.854466	0.774454	0.923374
188.75									0.827028	0.853916	0.734225	0.947446
189.25									0.908287	0.909743	0.720229	0.794804
189.75									0.930325	0.949387	0.809081	0.889304
190.25									0.960217	0.877479	0.851856	0.885626
190.75									0.869652	0.835352	0.762741	0.933904
191.25									0.947442	0.953867	0.953848	0.913355
191.75									1.22031	0.932879	0.82194	0.93247
192.25									1.0731	0.949479	0.819967	1.01543
192.75									1.08184	1.09536	0.960276	1.03334
193.25									1.0537	0.864051	0.97976	0.977367
193.75									1.2969	0.914503	0.964005	0.890865
194.25									1.3446	0.968409	1.00573	0.862082
194.75									1.21424	1.00054	0.95557	0.912362
195.25									1.23725	1.11097	1.03744	0.904105
195.75									1.00464	0.925193	1.04018	0.914653
196.25									1.03372	1.08632	1.01821	0.904437
196.75									1.40097	1.10266	1.07513	0.964631
197.25									1.16642	0.971894	1.08892	0.904388
197.75									0.896395	0.984387	0.958459	1.01796
198.25									1.09261	1.0277	1.01817	0.944616
198.75									1.20729	0.937437	0.924135	0.971102
199.25									1.35167	1.08323	1.18447	0.866132
199.75									1.2896	1.21272	0.974057	1.03133
200.25									1.23239	1.17248	1.07607	0.854684
200.75									1.00737	0.970057	0.955428	0.880154
201.25									1.21081	1.30485	1.10007	0.933945
201.75									1.24918	1.1182	0.940345	0.939453
202.25									1.10276	1.14571	1.01029	0.894128
202.75									1.16914	1.13854	1.02835	0.890315
203.25									1.08222	1.11078	1.01003	0.932124
203.75									0.977755	1.21035	0.966881	0.884917
204.25									1.17759	1.17108	0.988104	0.902459
204.75									1.22046	1.16756	0.872792	1.00293
205.25									1.00226	1.22221	0.856628	1.06938
205.75									1.02369	1.39505	0.819772	1.03257
206.25									1.21427	1.09724	0.952701	1.08375
206.75									1.191	1.25492	0.87224	0.998383
207.25									1.14317	1.15076	0.920148	1.04976
207.75									1.17749	1.28247	0.846125	1.02965
208.25									1.40741	1.01314	0.798164	1.04323
208.75									1.08628	1.00812	0.776269	1.10186
209.25									0.94826	1.23908	0.807058	1.00489
209.75									1.03085	1.04773	0.892012	1.17051
210.25									1.12637	0.918678	0.843207	1.14953
210.75									1.02692	0.895975	0.830595	1.11462
211.25									1.03624	0.924014	0.819481	1.12308
211.75									1.02612	0.949508	0.859783	1.08176
212.25									1.0783	0.943094	0.874123	1.00022
212.75									1.10484	0.849876	1.04811	0.940673
213.25									1.1227	0.845172	1.03749	1.0368
213.75									1.04361	0.84339	1.08299	1.01437
214.25									0.814939	1.05721	1.01343	0.960454
214.75									0.883951	0.994648	0.949112	0.894064
215.25									1.11594	0.928511	1.00313	0.970525
215.75									1.12797	0.869634	0.928057	0.860848
216.25									1.19475	0.9277	0.979459	0.8871
216.75									0.951913	0.887653	0.939534	0.868707
217.25									0.796889	0.962674	1.00539	0.802479
217.75									1.02057	1.01704	1.01879	0.784174
218.25									1.29402	0.968211	1.01887	0.862533
218.75									1.29216	0.915316	0.971869	0.8285
219.25									1.30121	0.959456	0.994354	0.881246
219.75									0.88564	1.08784	1.10531	0.797897
220.25									0.832061	1.05068	0.998968	0.838948
220.75									1.16649	1.01658	1.05037	0.81723
221.25									1.39073	1.09284	1.03821	0.891225
221.75									1.27845	1.1535	1.02014	0.918458
222.25									0.890308	1.04484	0.977494	0.917318
222.75									0.977214	1.29451	1.04562	0.949177
223.25									1.18578	1.09968	1.0389	0.965596
223.75									1.13708	1.03835	0.966316	0.876666
224.25									1.13934	1.22403	0.998969	0.990556
224.75									1.18833	1.23311	1.00087	0.95072
225.25									1.06678	1.27848	1.02947	0.896606
225.75									1.18821	1.23399	1.00874	0.860841
226.25									1.14872	1.24292	0.92204	0.901375
226.75									1.08731	1.26761	0.888202	1.03653
227.25									1.31414	1.24658	0.82606	0.978654
227.75									1.22809	1.40299	0.906206	1.08271
228.25									1.10432	1.26531	1.03723	1.08097
228.75									1.08517	1.31847	0.946431	1.06263
229.25									1.1506	1.28643	0.842868	1.07108
229.75									1.18773	1.23594	0.892798	1.02828
230.25									0.996802	1.24396	0.876472	1.10784
230.75									1.16999	1.348	0.94502	1.11184
231.25									1.05167	1.34958	0.871353	1.18318
231.75									0.974977	1.21291	0.785387	1.19449
232.25									1.06052	1.14967	0.807312	1.12424
232.75									1.15626	1.10941	0.893387	1.11755
233.25									1.09999	1.18359	0.943778	1.25425
233.75									0.838631	1.1355	0.981529	1.11456
234.25									0.944091	1.10174	0.892089	1.05901
234.75									0.905309	1.03493	0.848308	1.01967
235.25									1.02527	1.0266	0.835408	1.01051
235.75									0.882435	1.03944	0.919304	1.13003
236.25									1.00569	1.02477	0.890201	1.01638
236.75									0.899813	1.07954	0.805906	1.13685
237.25									1.06529	1.13493	0.924915	1.10439
237.75									1.00237	1.20711	0.999938	0.9958
238.25									1.09162	1.0897	1.02331	1.02563
238.75									0.969959	1.05551	1.07427	1.10693
239.25									0.874255	1.05237	0.996942	1.00133
239.75									1.14949	1.08655	1.02997	0.976147
240.25									1.21582	1.06462	0.959324	0.894613
240.75									1.16054	1.19002	0.894105	0.966987

## Sheet: C
amplitude estimate	Intact	BSL1	BSL2	SD	REC
A9737	0.325847	0.1038	0.221322	0.276899	0.137236
A9739	0.298979	0.0408542	0.277746	0.316085	0.124028
A9740	0.376364	0.103019	0.089489	0.487599	0.146822
A9742	0.266046	0.204361	0.232921	0.251138	0.0649561
