# Supplementary material for: The sleep-wake distribution contributes to the peripheral rhythms in PERIOD-2
Source: eLife. 2021 Dec 13;10:e69773. doi: 10.7554/eLife.69773 (PMC8798053; doi:10.7554/eLife.69773)
Supplement: Figure 3—source data 1. [file elife-69773-fig3-data1.xlsx]

## Sheet: A
Example raw data			Example post-processing
					Sinewave fitting
Time[hrs]	Detected photons		Time[hrs]	Normalized bioluminescence	BSL	SD2hOnOff	REC
12	6258		12.25	1.70953
12.0167	22698		12.75	1.09553
12.0334	19632		13.25	1.17973
12.0501	22304		13.75	1.24022
12.0668	22520		14.25	1.15277
12.0835	18493		14.75	0.829078
12.1002	15257		15.25	1.1891
12.1169	22780		15.75	1.1113
12.1336	30232		16.25	1.09175
12.1503	29285		16.75	0.989857
12.167	31268		17.25	1.20622
12.1837	34871		17.75	1.28102
12.2004	32973		18.25	1.45298
12.2171	31285		18.75	1.89222
12.2338	27714		19.25	1.09048
12.2505	25153		19.75	1.41956
12.2672	23142		20.25	1.30263
12.2839	21071		20.75	1.70847
12.3006	20879		21.25	1.785
12.3173	19451		21.75	1.38362
12.334	21304		22.25	1.35013
12.3507	16247		22.75	1.19467
12.3674	21031		23.25	1.25113
12.3841	20351		23.75	1.57068
12.4008	19193		24.25	1.04071	1.18411
12.4175	17846		24.75	1.3025	1.14048
12.4342	20794		25.25	1.37559	1.09395
12.4509	24712		25.75	1.37788	1.04525
12.4676	28496		26.25	0.868318	0.995181
12.4843	28710		26.75	1.0723	0.94453
12.501	22748		27.25	0.853028	0.894112
12.5177	23251		27.75	0.83242	0.844734
12.5344	21181		28.25	0.900547	0.797185
12.5511	19955		28.75	0.722093	0.752226
12.5678	19609		29.25	0.642947	0.710577
12.5845	19199		29.75	0.602749	0.672905
12.6012	19091		30.25	0.514711	0.639812
12.6179	19288		30.75	0.68985	0.611828
12.6346	21219		31.25	0.484592	0.589401
12.6513	21177		31.75	0.452038	0.57289
12.668	18674		32.25	0.448481	0.562558
12.6847	17696		32.75	0.726148	0.558572
12.7014	16290		33.25	0.550781	0.560995
12.7181	15985		33.75	0.290585	0.569788
12.7348	15109		34.25	0.463972	0.584811
12.7515	14456		34.75	0.660104	0.605822
12.7682	14758		35.25	0.544176	0.632487
12.7849	12584		35.75	0.790039	0.664378
12.8016	13098		36.25	0.614484	0.700985
12.8183	13187		36.75	0.884332	0.741722
12.835	11161		37.25	0.968096	0.785936
12.8517	10189		37.75	0.973771	0.832922
12.8684	9781		38.25	0.854082	0.881926
12.8851	9878		38.75	1.13592	0.932164
12.9018	9683		39.25	0.934724	0.982832
12.9185	10129		39.75	1.22093	1.03312
12.9352	10283		40.25	1.22607	1.08222
12.9519	11225		40.75	0.91984	1.12935
12.9686	9047		41.25	1.37648	1.17376
12.9853	10283		41.75	1.19797	1.21473
13.002	9173		42.25	1.23048	1.25161
13.0187	9075		42.75	1.61985	1.28381
13.0354	9490		43.25	1.10244	1.3108
13.0521	10946		43.75	1.51308	1.33217
13.0688	12534		44.25	1.26231	1.34757
13.0855	8712		44.75	1.35103	1.35676
13.1022	10885		45.25	1.11878	1.35957
13.1189	15720		45.75	1.75651	1.35598
13.1356	15305		46.25	1.12933	1.34603
13.1523	21598		46.75	1.50007	1.3299
13.169	20645		47.25	1.05554	1.30782
13.1857	20088		47.75	1.26362	1.28017
13.2024	26224		48.25	1.33838	1.24738
13.2191	25561		48.75	0.913617	1.20997
13.2358	21187		49.25	1.31412	1.16855
13.2525	18566		49.75	0.996314	1.12377
13.2692	18153		50.25	1.26615	1.07636
13.2859	16117		50.75	0.865273	1.02707
13.3026	16130		51.25	1.41745	0.976694
13.3193	15745		51.75	1.09935	0.926034
13.336	15142		52.25	1.0472	0.875903
13.3527	16485		52.75	0.825286	0.827103
13.3694	17628		53.25	0.908028	0.780414
13.3861	15883		53.75	0.673302	0.736584
13.4028	11094		54.25	0.506663	0.696315
13.4195	16273		54.75	0.761635	0.66025
13.4362	17712		55.25	0.621047	0.628967
13.4529	16381		55.75	0.458362	0.602967
13.4696	19914		56.25	0.724184	0.582665
13.4863	23919		56.75	0.559162	0.568386
13.503	24823		57.25	0.524885	0.56036
13.5197	23410		57.75	0.541075	0.558714
13.5364	22286		58.25	0.507595	0.563475
13.5531	19419		58.75	0.541068	0.574566
13.5698	19775		59.25	0.555779	0.591811
13.5865	18057		59.75	0.82339	0.614933
13.6032	18199		60.25	0.548863	0.643562
13.6199	17453		60.75	0.78971	0.677239
13.6366	14107		61.25	0.850765	0.715427
13.6533	12857		61.75	0.865133	0.757514
13.67	13038		62.25	0.842551	0.802826
13.6867	11742		62.75	0.718099	0.850638
13.7034	20325		63.25	1.05345	0.900185
13.7201	15836		63.75	0.949707	0.950674
13.7368	15220		64.25	1.00427	1.0013
13.7535	20545		64.75	1.08212	1.05124
13.7702	16548		65.25	1.11653	1.09972
13.7869	14613		65.75	1.365	1.14594
13.8036	19248		66.25	1.2475	1.18917
13.8203	19454		66.75	1.16426	1.22872
13.837	18520		67.25	1.22148	1.26395
13.8537	16129		67.75	1.40159	1.2943
13.8704	15995		68.25	1.16162	1.31929
13.8871	15846		68.75	1.4249	1.33851
13.9038	17472		69.25	1.43392	1.35166
13.9205	16162		69.75	1.16743	1.35853
13.9372	15975		70.25	1.16662	1.359
13.9539	15583		70.75	1.5515	1.35308
13.9706	12504		71.25	1.10806	1.34084
13.9873	14121		71.75	1.04898	1.3225
14.004	17568		72.25			0.846872
14.0207	18528		72.75			0.810849
14.0374	18759		73.25			0.776023
14.0541	20857		73.75			0.742893
14.0708	20229		74.25	0.506964		0.711935
14.0875	21946		74.75	0.461413		0.683594
14.1042	21785		75.25	0.435669		0.658276
14.1209	22349		75.75	0.548594		0.636345
14.1376	13435		76.25			0.618115
14.1543	13901		76.75			0.60385
14.171	12576		77.25			0.593752
14.1877	12563		77.75			0.587968
14.2044	11444		78.25	0.509641		0.58658
14.2211	12424		78.75	0.460101		0.589609
14.2378	19563		79.25	0.556259		0.59701
14.2545	19406		79.75	0.672657		0.608678
14.2712	17630		80.25			0.624445
14.2879	18089		80.75			0.644085
14.3046	17474		81.25			0.667315
14.3213	16606		81.75			0.693802
14.338	13831		82.25	0.712439		0.723167
14.3547	14262		82.75	0.770702		0.754986
14.3714	13848		83.25	0.80409		0.788804
14.3881	12906		83.75	1.26458		0.824135
14.4048	13664		84.25			0.860471
14.4215	13684		84.75			0.897291
14.4382	13374		85.25			0.934067
14.4549	13110		85.75			0.970269
14.4716	13158		86.25	0.758972		1.00538
14.4883	12523		86.75	0.828358		1.03889
14.505	12035		87.25	0.772822		1.07033
14.5217	11832		87.75	0.762713		1.09924
14.5384	11347		88.25			1.1252
14.5551	11947		88.75			1.14784
14.5718	11357		89.25			1.16685
14.5885	11337		89.75			1.18193
14.6052	8662		90.25	1.06582		1.19289
14.6219	8074		90.75	1.03925		1.19956
14.6386	8048		91.25	1.23509		1.20184
14.6553	10993		91.75	1.10212		1.19971
14.672	11373		92.25			1.19319
14.6887	10597		92.75			1.18238
14.7054	9678		93.25			1.16742
14.7221	12381		93.75			1.14855
14.7388	11631		94.25	1.13495		1.12602
14.7555	15058		94.75	1.08752		1.10017
14.7722	12851		95.25	0.957461		1.07135
14.7889	11604		95.75	0.971665		1.04
14.8056	13283		96.25			1.00654
14.8223	12769		96.75			0.97148
14.839	10512		97.25			0.935306
14.8557	11707		97.75			0.898542
14.8724	13046		98.25	0.972888		0.861714
14.8891	13668		98.75	0.882326		0.825353
14.9058	14761		99.25	0.896986		0.78998
14.9225	12880		99.75	0.981303		0.756103
14.9392	13654		100.25			0.724208
14.9559	13216		100.75			0.694753
14.9726	13598		101.25			0.668162
14.9893	13209		101.75			0.644815
15.006	13180		102.25	0.600741		0.625049
15.0227	13705		102.75	0.555905		0.609147
15.0394	12188		103.25	0.597782		0.597337
15.0561	16683		103.75	0.653162		0.589789
15.0728	16741		104.25			0.586611
15.0895	14807		104.75			0.587849
15.1062	13085		105.25			0.593485
15.1229	14262		105.75			0.603438
15.1396	17326		106.25	0.699903		0.617566
15.1563	18759		106.75	0.780717		0.635664
15.173	16400		107.25	0.68546		0.657475
15.1897	19013		107.75	1.00211		0.682684
15.2064	19273		108.25			0.710929
15.2231	19350		108.75			0.741805
15.2398	16488		109.25			0.774869
15.2565	15795		109.75			0.809646
15.2732	16215		110.25	0.870612		0.845637
15.2899	12892		110.75	0.823187		0.882324
15.3066	12931		111.25	0.811256		0.919181
15.3233	13702		111.75	0.962412		0.95568
15.34	12755		112.25			0.991295
15.3567	13048		112.75			1.02552
15.3734	12621		113.25			1.05785
15.3901	21254		113.75			1.08784
15.4068	22220		114.25	1.37981		1.11504
15.4235	22280		114.75	1.50438		1.13907
15.4402	22445		115.25	1.25307		1.15959
15.4569	18854		115.75	1.45337		1.1763
15.4736	20129		116.25			1.18895
15.4903	16571		116.75			1.19738
15.507	19859		117.25			1.20145
15.5237	13090		117.75			1.20111
15.5404	17438		118.25	1.13736		1.19636
15.5571	23709		118.75	1.25895		1.18727
15.5738	23800		119.25	1.39217		1.17398
15.5905	24592		119.75	1.16655		1.15667
15.6072	21638		120.25	1.22629			1.35085
15.6239	21293		120.75	1.08329			1.32608
15.6406	20314		121.25	1.06031			1.29549
15.6573	19126		121.75	0.925323			1.25962
15.674	18155		122.25	1.23316			1.21908
15.6907	17597		122.75	1.21134			1.17459
15.7074	17223		123.25	1.04615			1.12691
15.7241	16442		123.75	1.04946			1.07686
15.7408	15416		124.25	1.07727			1.02532
15.7575	16164		124.75	0.986725			0.973166
15.7742	15788		125.25	0.889324			0.921311
15.7909	11670		125.75	0.886946			0.870648
15.8076	11158		126.25	0.822603			0.822056
15.8243	11070		126.75	0.741333			0.776375
15.841	11353		127.25	0.682234			0.734395
15.8577	10200		127.75	0.600812			0.696844
15.8744	11357		128.25	0.680477			0.66437
15.8911	11016		128.75	0.589918			0.637536
15.9078	11105		129.25	0.713646			0.616807
15.9245	12167		129.75	0.720993			0.60254
15.9412	11104		130.25	0.606039			0.594983
15.9579	11650		130.75	0.637729			0.594267
15.9746	8903		131.25	0.606738			0.600404
15.9913	10509		131.75	0.678694			0.613288
16.008	13057		132.25	0.712565			0.632695
16.0247	12466		132.75	0.883086			0.658291
16.0414	13457		133.25	0.828677			0.689631
16.0581	13919		133.75	0.926309			0.726175
16.0748	13083		134.25	0.88238			0.767288
16.0915	11971		134.75	0.855205			0.812261
16.1082	15229		135.25	1.02038			0.860314
16.1249	18376		135.75	0.957158			0.910616
16.1416	16899		136.25	0.974891			0.962296
16.1583	14451		136.75	1.15073			1.01446
16.175	13604		137.25	1.12538			1.06621
16.1917	17488		137.75	1.17403			1.11664
16.2084	18405		138.25	1.13605			1.16488
16.2251	16046		138.75	1.31484			1.21011
16.2418	16806		139.25	1.08692			1.25152
16.2585	17886		139.75	1.33664			1.28842
16.2752	15274		140.25	1.1234			1.32016
16.2919	15741		140.75	1.45443			1.34619
16.3086	16706		141.25	1.37753			1.36606
16.3253	16156		141.75	1.50738			1.37942
16.342	13563		142.25	1.20674			1.38606
16.3587	12774		142.75	1.63658			1.38584
16.3754	13984		143.25	1.51819			1.37877
16.3921	14060		143.75	1.26111			1.36499
16.4088	17073		144.25	1.71458			1.34472
16.4255	17490		144.75	1.30011			1.31831
16.4422	17267		145.25	1.94571			1.28623
16.4589	14579		145.75	1.3533			1.24903
16.4756	14423		146.25	1.33937			1.20734
16.4923	14948		146.75	1.33397			1.16191
16.509	16101		147.25	1.207			1.1135
16.5257	16780		147.75	1.00934			1.06296
16.5424	15028		148.25	1.10121			1.01116
16.5591	16231		148.75	0.983209			0.958996
16.5758	17883		149.25	0.90945			0.907377
16.5925	17493		149.75	0.81093			0.857192
16.6092	15155		150.25	0.786128			0.80931
16.6259	14940		150.75	0.679818			0.76456
16.6426	13934		151.25	0.6284			0.723715
16.6593	14570		151.75	0.615611			0.687484
16.676	14958		152.25	0.719405			0.656492
16.6927	13828		152.75	0.526891			0.631277
16.7094	13821		153.25	0.63463			0.612274
16.7261	13691		153.75	0.551673			0.599813
16.7428	12936		154.25	0.593024			0.594108
16.7595	12592		154.75	0.573746			0.59526
16.7762	13224		155.25	0.58749			0.603247
16.7929	12604		155.75	0.550413			0.617932
16.8096	13939		156.25	0.730487			0.63906
16.8263	11358		156.75	0.659643			0.666267
16.843	12512		157.25	0.659102			0.69908
16.8597	14621		157.75	0.791403			0.736932
16.8764	15076		158.25	0.728341			0.779169
16.8931	13831		158.75	0.847119			0.825059
16.9098	10604		159.25	0.981763			0.873808
16.9265	12838		159.75	0.890221			0.924572
16.9432	12272		160.25	1.09669			0.976473
16.9599	10576		160.75	0.978014			1.02861
16.9766	10871		161.25	1.14094			1.08009
16.9933	13603		161.75	1.06901			1.13001
17.01	14611		162.25	1.21788			1.17752
17.0267	14832		162.75	1.13858			1.22178
17.0434	15710		163.25	1.59386			1.26204
17.0601	14623		163.75	1.19746			1.29759
17.0768	14284		164.25	1.15482			1.32782
17.0935	15182		164.75	1.44946			1.35222
17.1102	16771		165.25	1.22599			1.37035
17.1269	19157		165.75	1.42446			1.3819
17.1436	16851		166.25	1.27219			1.38668
17.1603	13537		166.75	1.07222			1.38459
17.177	11634		167.25	1.37769			1.37568
17.1937	13886		167.75	1.26618			1.3601
17.2104	18759		168.25	1.40154
17.2271	15710		168.75	1.06858
17.2438	19959		169.25	1.33256
17.2605	20583		169.75	1.11849
17.2772	18056		170.25	1.20824
17.2939	17335		170.75	1.1214
17.3106	17596		171.25	1.2909
17.3273	16567		171.75	0.968142
17.344	18099		172.25	1.17666
17.3607	17865		172.75	1.02858
17.3774	17859		173.25	0.891383
17.3941	17898		173.75	0.908534
17.4108	16858		174.25	0.85893
17.4275	15719		174.75	0.67169
17.4442	12638		175.25	0.642927
17.4609	16316		175.75	0.635191
17.4776	20170		176.25	0.708639
17.4943	21568		176.75	0.60874
17.511	23388		177.25	0.708968
17.5277	21760		177.75	0.670429
17.5444	18247		178.25	0.596268
17.5611	19489		178.75	0.65577
17.5778	19766		179.25	0.637115
17.5945	21797		179.75	0.686916
17.6112	20254		180.25	0.670456
17.6279	18089
17.6446	18688
17.6613	16613
17.678	16518
17.6947	15579
17.7114	15726
17.7281	15509
17.7448	14978
17.7615	14894
17.7782	17955
17.7949	18226
17.8116	17018
17.8283	17123
17.845	17465
17.8617	16919
17.8784	16691
17.8951	17874
17.9118	17854
17.9285	16980
17.9452	16141
17.9619	16138
17.9786	16066
17.9953	15352
18.012	16183
18.0287	14215
18.0454	13806
18.0621	13023
18.0788	12404
18.0955	10429
18.1122	12539
18.1289	8537
18.1456	18473
18.1623	24616
18.179	23659
18.1957	23516
18.2124	19150
18.2291	24414
18.2458	24732
18.2625	22471
18.2792	19779
18.2959	22066
18.3126	22761
18.3293	21742
18.346	24133
18.3627	25797
18.3794	23934
18.3961	22629
18.4128	22919
18.4295	24101
18.4462	23541
18.4629	18594
18.4796	18107
18.4963	22556
18.513	21680
18.5297	21602
18.5464	21179
18.5631	15255
18.5798	25293
18.5965	26763
18.6132	26611
18.6299	24212
18.6466	24010
18.6633	24401
18.68	22125
18.6967	18701
18.7134	26793
18.7301	30619
18.7468	30860
18.7635	31011
18.7802	32878
18.7969	36120
18.8136	34094
18.8303	32267
18.847	29571
18.8637	25102
18.8804	23469
18.8971	23514
18.9138	23544
18.9305	23223
18.9472	24572
18.9639	23209
18.9806	22128
18.9973	18270
19.014	16809
19.0307	15773
19.0474	15795
19.0641	15381
19.0808	13215
19.0975	13234
19.1142	15750
19.1309	15066
19.1476	16154
19.1643	13562
19.181	10731
19.1977	6575
19.2144	10454
19.2311	14855
19.2478	16839
19.2645	17047
19.2812	15981
19.2979	15475
19.3146	15289
19.3313	15045
19.348	15655
19.3647	16185
19.3814	14959
19.3981	15540
19.4148	15591
19.4315	17351
19.4482	18537
19.4649	19046
19.4816	18447
19.4983	14991
19.515	16196
19.5317	15786
19.5484	14148
19.5651	14856
19.5818	18993
19.5985	25649
19.6152	24934
19.6319	23198
19.6486	25247
19.6653	23562
19.682	23030
19.6987	22865
19.7154	19596
19.7321	20606
19.7488	21398
19.7655	24985
19.7822	21971
19.7989	18617
19.8156	18738
19.8323	20709
19.849	20348
19.8657	18531
19.8824	18061
19.8991	17672
19.9158	16343
19.9325	15225
19.9492	15232
19.9659	15173
19.9826	15025
19.9993	14633
20.016	13931
20.0327	15401
20.0494	15784
20.0661	15205
20.0828	14582
20.0995	15087
20.1162	14950
20.1329	15102
20.1496	15048
20.1663	15641
20.183	15891
20.1997	15938
20.2164	15264
20.2331	13152
20.2498	12270
20.2665	13368
20.2832	9466
20.2999	11373
20.3166	20774
20.3333	24406
20.35	19745
20.3667	24159
20.3834	25635
20.4001	26269
20.4168	18558
20.4335	18727
20.4502	19575
20.4669	24999
20.4836	27297
20.5003	28655
20.517	31906
20.5337	26263
20.5504	26866
20.5671	29962
20.5838	29981
20.6005	29412
20.6172	29802
20.6339	30643
20.6506	29453
20.6673	24885
20.684	24168
20.7007	24366
20.7174	26053
20.7341	26310
20.7508	25527
20.7675	24877
20.7842	24439
20.8009	22729
20.8176	21691
20.8343	20215
20.851	19777
20.8677	17339
20.8844	15962
20.9011	16079
20.9178	14007
20.9345	14991
20.9512	16122
20.9679	16149
20.9846	15144
21.0013	16571
21.018	17862
21.0347	19035
21.0514	18850
21.0681	21296
21.0848	21495
21.1015	20519
21.1182	20367
21.1349	14728
21.1516	28815
21.1683	31138
21.185	31062
21.2017	30415
21.2184	29237
21.2351	27795
21.2518	28644
21.2685	29633
21.2852	22743
21.3019	26014
21.3186	24668
21.3353	23391
21.352	13320
21.3687	14194
21.3854	26546
21.4021	30776
21.4188	29003
21.4355	26215
21.4522	24988
21.4689	23768
21.4856	22297
21.5023	22002
21.519	20770
21.5357	18954
21.5524	17829
21.5691	16784
21.5858	16354
21.6025	16803
21.6192	14072
21.6359	15327
21.6526	16480
21.6693	15630
21.686	14626
21.7027	15717
21.7194	16610
21.7361	19389
21.7528	24430
21.7695	24442
21.7862	21713
21.8029	17898
21.8196	21992
21.8363	22774
21.853	22528
21.8697	21980
21.8864	21824
21.9031	21267
21.9198	20919
21.9365	20920
21.9532	19517
21.9699	16820
21.9866	16971
22.0033	15295
22.02	14764
22.0367	15117
22.0534	15653
22.0701	15605
22.0868	14619
22.1035	15297
22.1202	14469
22.1369	14421
22.1536	14857
22.1703	16346
22.187	15761
22.2037	17177
22.2204	16665
22.2371	16658
22.2538	18232
22.2705	13867
22.2872	16833
22.3039	19273
22.3206	16012
22.3373	15551
22.354	16250
22.3707	24722
22.3874	29012
22.4041	26551
22.4208	24370
22.4375	26202
22.4542	25346
22.4709	21634
22.4876	20687
22.5043	21612
22.521	21379
22.5377	24026
22.5544	24131
22.5711	23484
22.5878	21476
22.6045	20204
22.6212	19666
22.6379	19812
22.6546	18844
22.6713	18322
22.688	17928
22.7047	16853
22.7214	16062
22.7381	15966
22.7548	14662
22.7715	14166
22.7882	13748
22.8049	13565
22.8216	13585
22.8383	13920
22.855	11923
22.8717	14002
22.8884	13199
22.9051	12625
22.9218	12021
22.9385	11453
22.9552	13177
22.9719	14053
22.9886	15626
23.0053	13832
23.022	17791
23.0387	16497
23.0554	17176
23.0721	14425
23.0888	18489
23.1055	23913
23.1222	25685
23.1389	20515
23.1556	20643
23.1723	20827
23.189	20645
23.2057	19236
23.2224	19227
23.2391	17412
23.2558	17252
23.2725	16425
23.2892	16176
23.3059	16065
23.3226	16048
23.3393	15403
23.356	15129
23.3727	14618
23.3894	14247
23.4061	15799
23.4228	14635
23.4395	13391
23.4562	14130
23.4729	12820
23.4896	14343
23.5063	16175
23.523	14813
23.5397	16905
23.5564	16265
23.5731	16933
23.5898	11760
23.6065	6864
23.6232	7157
23.6399	15010
23.6566	20833
23.6733	22549
23.69	27879
23.7067	29823
23.7234	29042
23.7401	29780
23.7568	31016
23.7735	27738
23.7902	26341
23.8069	28678
23.8236	28468
23.8403	27253
23.857	25779
23.8737	24622
23.8904	23922
23.9071	18635
23.9238	16281
23.9405	17203
23.9572	18741
23.9739	19354
23.9906	19372
24.0073	18462
24.024	15621
24.0407	15067
24.0574	14490
24.0741	14536
24.0908	14408
24.1075	16017
24.1242	19571
24.1409	17076
24.1576	18109
24.1743	17273
24.191	16932
24.2077	15702
24.2244	16238
24.2411	15202
24.2578	15854
24.2745	14084
24.2912	15825
24.3079	15914
24.3246	16124
24.3413	15219
24.358	14368
24.3747	12270
24.3914	11799
24.4081	11782
24.4248	10563
24.4415	10071
24.4582	11285
24.4749	11430
24.4916	10878
24.5083	10267
24.525	11185
24.5417	11580
24.5584	11332
24.5751	11046
24.5918	11063
24.6085	10636
24.6252	9281
24.6419	10475
24.6586	8120
24.6753	9418
24.692	12144
24.7087	14688
24.7254	15380
24.7421	14987
24.7588	14258
24.7755	15247
24.7922	16270
24.8089	17103
24.8256	19940
24.8423	20550
24.859	18357
24.8757	21972
24.8924	15448
24.9091	19779
24.9258	27780
24.9425	36524
24.9592	32621
24.9759	31751
24.9926	32991
25.0093	32235
25.026	29581
25.0427	28501
25.0594	29483
25.0761	27204
25.0928	26124
25.1095	25206
25.1262	22619
25.1429	19242
25.1596	19420
25.1763	18993
25.193	17452
25.2097	16724
25.2264	16430
25.2431	16369
25.2598	15523
25.2765	15042
25.2932	16196
25.3099	15391
25.3266	16516
25.3433	17212
25.36	18180
25.3767	16496
25.3934	17312
25.4101	17222
25.4268	16215
25.4435	13664
25.4602	14520
25.4769	14752
25.4936	13733
25.5103	10646
25.527	10624
25.5437	12635
25.5604	12131
25.5771	13075
25.5938	13188
25.6105	16082
25.6272	17335
25.6439	15657
25.6606	13614
25.6773	14125
25.694	10488
25.7107	18015
25.7274	23396
25.7441	16495
25.7608	19703
25.7775	17655
25.7942	20739
25.8109	28682
25.8276	32194
25.8443	30560
25.861	24711
25.8777	23333
25.8944	22757
25.9111	21825
25.9278	20772
25.9445	19362
25.9612	18354
25.9779	17528
25.9946	18907
26.0113	18679
26.028	17784
26.0447	16766
26.0614	16459
26.0781	15837
26.0948	14671
26.1115	13982
26.1282	13586
26.1449	13184
26.1616	13025
26.1783	12634
26.195	11547
26.2117	11115
26.2284	10939
26.2451	10084
26.2618	9948
26.2785	9102
26.2952	9319
26.3119	9741
26.3286	12193
26.3453	13264
26.362	12338
26.3787	12005
26.3954	12108
26.4121	11204
26.4288	11023
26.4455	11034
26.4622	10816
26.4789	10866
26.4956	11188
26.5123	9183
26.529	6636
26.5457	7173
26.5624	9693
26.5791	11452
26.5958	9496
26.6125	10571
26.6292	11446
26.6459	12334
26.6626	12950
26.6793	12348
26.696	15048
26.7127	12575
26.7294	18336
26.7461	19207
26.7628	17069
26.7795	16758
26.7962	10030
26.8129	11684
26.8296	18071
26.8463	14265
26.863	16863
26.8797	19605
26.8964	21264
26.9131	20550
26.9298	20163
26.9465	19411
26.9632	18488
26.9799	18035
26.9966	17033
27.0133	16405
27.03	15854
27.0467	16129
27.0634	16601
27.0801	16300
27.0968	15422
27.1135	14306
27.1302	12903
27.1469	11193
27.1636	12417
27.1803	13596
27.197	12692
27.2137	12429
27.2304	10588
27.2471	10930
27.2638	11086
27.2805	10274
27.2972	9898
27.3139	8592
27.3306	8251
27.3473	7945
27.364	9600
27.3807	8696
27.3974	9820
27.4141	10888
27.4308	11149
27.4475	11688
27.4642	13470
27.4809	10719
27.4976	10794
27.5143	16397
27.531	15580
27.5477	16421
27.5644	15147
27.5811	14592
27.5978	15995
27.6145	16359
27.6312	13542
27.6479	12943
27.6646	12719
27.6813	12915
27.698	12225
27.7147	12467
27.7314	10817
27.7481	11267
27.7648	11487
27.7815	11112
27.7982	10123
27.8149	10017
27.8316	9863
27.8483	9571
27.865	8788
27.8817	7277
27.8984	8079
27.9151	9736
27.9318	10015
27.9485	9633
27.9652	10111
27.9819	7524
27.9986	11802
28.0153	14369
28.032	11690
28.0487	14698
28.0654	18970
28.0821	17755
28.0988	16762
28.1155	18065
28.1322	18530
28.1489	16564
28.1656	15938
28.1823	15498
28.199	14477
28.2157	13591
28.2324	12898
28.2491	12225
28.2658	12105
28.2825	11480
28.2992	11185
28.3159	11099
28.3326	10980
28.3493	10778
28.366	10464
28.3827	10335
28.3994	9826
28.4161	9917
28.4328	9769
28.4495	10172
28.4662	9564
28.4829	7266
28.4996	7304
28.5163	8495
28.533	7798
28.5497	9431
28.5664	8830
28.5831	9597
28.5998	11099
28.6165	11074
28.6332	10971
28.6499	9973
28.6666	5929
28.6833	10038
28.7	10338
28.7167	11227
28.7334	13276
28.7501	15846
28.7668	13378
28.7835	13489
28.8002	12867
28.8169	11789
28.8336	11690
28.8503	10563
28.867	9974
28.8837	9610
28.9004	9054
28.9171	9014
28.9338	8797
28.9505	8445
28.9672	9049
28.9839	9097
29.0006	8755
29.0173	8727
29.034	9250
29.0507	9062
29.0674	8483
29.0841	7981
29.1008	8225
29.1175	5734
29.1342	6561
29.1509	6511
29.1676	7473
29.1843	7421
29.201	8016
29.2177	9148
29.2344	8875
29.2511	10077
29.2678	10472
29.2845	10806
29.3012	11880
29.3179	8645
29.3346	10488
29.3513	9473
29.368	8663
29.3847	9916
29.4014	10963
29.4181	12679
29.4348	11180
29.4515	9811
29.4682	8921
29.4849	9787
29.5016	10774
29.5183	11866
29.535	13437
29.5517	12276
29.5684	10233
29.5851	9875
29.6018	10193
29.6185	9321
29.6352	9471
29.6519	8111
29.6686	7777
29.6853	8489
29.702	10339
29.7187	10197
29.7354	9581
29.7521	8334
29.7688	7753
29.7855	7410
29.8022	7866
29.8189	7064
29.8356	7599
29.8523	8195
29.869	7878
29.8857	7950
29.9024	8009
29.9191	7728
29.9358	7145
29.9525	7549
29.9692	8254
29.9859	8512
30.0026	8142
30.0193	8808
30.036	9236
30.0527	9133
30.0694	8926
30.0861	9883
30.1028	9150
30.1195	7342
30.1362	7513
30.1529	7416
30.1696	7298
30.1863	7044
30.203	7563
30.2197	7250
30.2364	7225
30.2531	7216
30.2698	7358
30.2865	7458
30.3032	8158
30.3199	8289
30.3366	8970
30.3533	9148
30.37	7190
30.3867	4696
30.4034	5877
30.4201	5543
30.4368	6508
30.4535	5707
30.4702	6406
30.4869	7277
30.5036	9484
30.5203	9237
30.537	7959
30.5537	8324
30.5704	9327
30.5871	9432
30.6038	8046
30.6205	8858
30.6372	11056
30.6539	8588
30.6706	9864
30.6873	9994
30.704	9712
30.7207	7784
30.7374	11196
30.7541	10136
30.7708	10907
30.7875	10775
30.8042	11320
30.8209	11720
30.8376	11259
30.8543	11220
30.871	8624
30.8877	8455
30.9044	10030
30.9211	11070
30.9378	11139
30.9545	10452
30.9712	10177
30.9879	9905
31.0046	9860
31.0213	9262
31.038	8970
31.0547	8205
31.0714	7962
31.0881	7891
31.1048	8091
31.1215	7906
31.1382	7679
31.1549	8813
31.1716	8221
31.1883	8154
31.205	7567
31.2217	6550
31.2384	6173
31.2551	6350
31.2718	7691
31.2885	8097
31.3052	8019
31.3219	7671
31.3386	7445
31.3553	6925
31.372	6554
31.3887	6347
31.4054	6683
31.4221	6541
31.4388	6357
31.4555	6221
31.4722	6121
31.4889	6166
31.5056	6135
31.5223	5990
31.539	5776
31.5557	5851
31.5724	5924
31.5891	6640
31.6058	6360
31.6225	6587
31.6392	6804
31.6559	7234
31.6726	7210
31.6893	7749
31.706	7705
31.7227	7705
31.7394	6609
31.7561	6978
31.7728	6661
31.7895	6524
31.8062	6953
31.8229	7004
31.8396	6576
31.8563	7303
31.873	7150
31.8897	7077
31.9064	6964
31.9231	6932
31.9398	6683
31.9565	6521
31.9732	6426
31.9899	6523
32.0066	6343
32.0233	8010
32.04	8277
32.0567	8501
32.0734	8204
32.0901	5621
32.1068	5476
32.1235	5382
32.1402	6625
32.1569	7026
32.1736	7221
32.1903	6873
32.207	6926
32.2237	6705
32.2404	7249
32.2571	7202
32.2738	6564
32.2905	5978
32.3072	6228
32.3239	6964
32.3406	7593
32.3573	7755
32.374	7889
32.3907	7970
32.4074	8161
32.4241	7594
32.4408	7674
32.4575	4782
32.4742	3715
32.4909	5404
32.5076	5266
32.5243	6366
32.541	8159
32.5577	6422
32.5744	9832
32.5911	14928
32.6078	14277
32.6245	12668
32.6412	11624
32.6579	12461
32.6746	12085
32.6913	11217
32.708	11695
32.7247	11936
32.7414	12010
32.7581	11711
32.7748	10740
32.7915	11428
32.8082	11105
32.8249	10494
32.8416	10112
32.8583	9853
32.875	9472
32.8917	9325
32.9084	10799
32.9251	9603
32.9418	9127
32.9585	7774
32.9752	5530
32.9919	6371
33.0086	8297
33.0253	8412
33.042	8707
33.0587	10136
33.0754	12691
33.0921	12770
33.1088	11472
33.1255	11580
33.1422	11304
33.1589	12128
33.1756	11235
33.1923	10609
33.209	9753
33.2257	7914
33.2424	7287
33.2591	7163
33.2758	6727
33.2925	6668
33.3092	6701
33.3259	6220
33.3426	6049
33.3593	6163
33.376	6249
33.3927	6110
33.4094	5729
33.4261	5601
33.4428	5628
33.4595	5727
33.4762	5514
33.4929	6156
33.5096	5978
33.5263	6007
33.543	6042
33.5597	5454
33.5764	5092
33.5931	5276
33.6098	5073
33.6265	4782
33.6432	4601
33.6599	4685
33.6766	4684
33.6933	4408
33.71	4608
33.7267	4630
33.7434	4622
33.7601	4507
33.7768	4441
33.7935	4662
33.8102	4513
33.8269	4293
33.8436	4214
33.8603	4450
33.877	4347
33.8937	4169
33.9104	3817
33.9271	4085
33.9438	3998
33.9605	4831
33.9772	4998
33.9939	5390
34.0106	5488
34.0273	5788
34.044	6229
34.0607	6896
34.0774	6471
34.0941	6572
34.1108	7147
34.1275	8204
34.1442	8103
34.1609	9012
34.1776	9095
34.1943	9184
34.211	8955
34.2277	9046
34.2444	8726
34.2611	8255
34.2778	8135
34.2945	7736
34.3112	7351
34.3279	6898
34.3446	6804
34.3613	6001
34.378	5227
34.3947	5140
34.4114	6144
34.4281	5908
34.4448	5106
34.4615	4049
34.4782
34.4949	3775
34.5116	5766
34.5283	5350
34.545	6616
34.5617	9030
34.5784	8169
34.5951	8762
34.6118	10605
34.6285	10975
34.6452	8605
34.6619	10108
34.6786	9590
34.6953	9417
34.712	9022
34.7287	9441
34.7454	11491
34.7621	8729
34.7788	8182
34.7955	7924
34.8122	6238
34.8289	8007
34.8456	8947
34.8623	7365
34.879	11959
34.8957	13284
34.9124	13132
34.9291	12904
34.9458	12323
34.9625	9874
34.9792	8294
34.9959	8088
35.0126	6935
35.0293	9212
35.046	9734
35.0627	8778
35.0794	8030
35.0961	8046
35.1128	8685
35.1295	8726
35.1462	8523
35.1629	7915
35.1796	7889
35.1963	7165
35.213	6981
35.2297	7074
35.2464	6991
35.2631	6782
35.2798	6636
35.2965	6607
35.3132	6691
35.3299	6544
35.3466	6510
35.3633	6882
35.38	6688
35.3967	7276
35.4134	7809
35.4301	8174
35.4468	7169
35.4635	6545
35.4802	10941
35.4969	10698
35.5136	11578
35.5303	10469
35.547	8331
35.5637	10114
35.5804	11854
35.5971	15553
35.6138	14909
35.6305	14261
35.6472	13537
35.6639	13743
35.6806	14709
35.6973	14175
35.714	16320
35.7307	14862
35.7474	12487
35.7641	12346
35.7808	13253
35.7975	11382
35.8142	9210
35.8309	8645
35.8476	7730
35.8643	8232
35.881	7314
35.8977	7670
35.9144	8422
35.9311	8537
35.9478	9159
35.9645	9258
35.9812	9266
35.9979	8921
36.0146	9188
36.0313	9225
36.048	9438
36.0647	9066
36.0814	8352
36.0981	8235
36.1148	8095
36.1315	7254
36.1482	7116
36.1649	7101
36.1816	7737
36.1983	6986
36.215	5337
36.2317	4458
36.2484	4825
36.2651	5000
36.2818	7001
36.2985	7913
36.3152	6520
36.3319	6394
36.3486	6845
36.3653	7156
36.382	9982
36.3987	9049
36.4154	8542
36.4321	12328
36.4488	15596
36.4655	15159
36.4822	13809
36.4989	12669
36.5156	12850
36.5323	14237
36.549	15425
36.5657	17614
36.5824	18260
36.5991	18022
36.6158	15214
36.6325	17852
36.6492	17786
36.6659	17694
36.6826	16466
36.6993	15408
36.716	15110
36.7327	14694
36.7494	14257
36.7661	11818
36.7828	11444
36.7995	11330
36.8162	10468
36.8329	10840
36.8496	10061
36.8663	8296
36.883	7035
36.8997	7029
36.9164	6924
36.9331	6769
36.9498	7290
36.9665	9879
36.9832	8962
36.9999	8225
37.0166	9430
37.0333	8725
37.05	13920
37.0667	15653
37.0834	13540
37.1001	13923
37.1168	13680
37.1335	12478
37.1502	12956
37.1669	13287
37.1836	10525
37.2003	11921
37.217	15479
37.2337	13257
37.2504	13915
37.2671	14867
37.2838	14689
37.3005	13308
37.3172	12764
37.3339	13648
37.3506	12581
37.3673	12375
37.384	15426
37.4007	13772
37.4174	12961
37.4341	11083
37.4508	11506
37.4675	12681
37.4842	13222
37.5009	11524
37.5176	13290
37.5343	15998
37.551	16127
37.5677	18317
37.5844	16143
37.6011	16906
37.6178	17182
37.6345	14157
37.6512	14632
37.6679	13861
37.6846	13832
37.7013	13021
37.718	12994
37.7347	12710
37.7514	14221
37.7681	14664
37.7848	13752
37.8015	11475
37.8182	13512
37.8349	14793
37.8516	14686
37.8683	14392
37.885	11016
37.9017	11755
37.9184	13693
37.9351	13557
37.9518	10754
37.9685	8081
37.9852	7219
38.0019	10207
38.0186	11672
38.0353	12848
38.052	16243
38.0687	15538
38.0854	13157
38.1021	13237
38.1188	14629
38.1355	14541
38.1522	14787
38.1689	14834
38.1856	14502
38.2023	13882
38.219	12995
38.2357	14086
38.2524	11542
38.2691	9845
38.2858	10238
38.3025	11550
38.3192	11525
38.3359	11072
38.3526	10098
38.3693	8979
38.386	8882
38.4027	8857
38.4194	8298
38.4361	9217
38.4528	6468
38.4695	10786
38.4862	13067
38.5029	10530
38.5196	7921
38.5363	14738
38.553	15697
38.5697	15187
38.5864	16069
38.6031	15023
38.6198	16708
38.6365	13005
38.6532	15136
38.6699	13980
38.6866	11857
38.7033	12158
38.72	15412
38.7367	14775
38.7534	13097
38.7701	11923
38.7868	11622
38.8035	13491
38.8202	13956
38.8369	13989
38.8536	14050
38.8703	15402
38.887	14292
38.9037	17379
38.9204	17050
38.9371	19621
38.9538	20501
38.9705	19927
38.9872	19941
39.0039	19501
39.0206	17331
39.0373	15841
39.054	14337
39.0707	15606
39.0874	15972
39.1041	13900
39.1208	13179
39.1375	14332
39.1542	13522
39.1709	13840
39.1876	13323
39.2043	13213
39.221	14443
39.2377	14648
39.2544	14353
39.2711	12985
39.2878	12513
39.3045	12091
39.3212	11475
39.3379	11226
39.3546	11119
39.3713	10353
39.388	8444
39.4047	9694
39.4214	8099
39.4381	10635
39.4548	9831
39.4715	11726
39.4882	14483
39.5049	14206
39.5216	16209
39.5383	16765
39.555	17768
39.5717	17343
39.5884	18585
39.6051	19313
39.6218	20340
39.6385	16094
39.6552	19952
39.6719	19454
39.6886	18228
39.7053	18208
39.722	17467
39.7387	14986
39.7554	12152
39.7721	12889
39.7888	14366
39.8055	16069
39.8222	17081
39.8389	18097
39.8556	18011
39.8723	17841
39.889	16704
39.9057	16450
39.9224	15167
39.9391	16964
39.9558	13908
39.9725	13466
39.9892	14090
40.0059	16739
40.0226	14561
40.0393	13779
40.056	14190
40.0727	15655
40.0894	14177
40.1061	12279
40.1228	14233
40.1395	17328
40.1562	19240
40.1729	19101
40.1896	17389
40.2063	17627
40.223	22000
40.2397	21045
40.2564	18934
40.2731	18232
40.2898	16262
40.3065	16609
40.3232	17289
40.3399	17611
40.3566	16981
40.3733	15671
40.39	15587
40.4067	15777
40.4234	17918
40.4401	17053
40.4568	17099
40.4735	16249
40.4902	15297
40.5069	14545
40.5236	13559
40.5403	12880
40.557	12434
40.5737	13288
40.5904	13481
40.6071	12738
40.6238	12863
40.6405	12628
40.6572	12516
40.6739	11740
40.6906	11494
40.7073	11447
40.724	11661
40.7407	11591
40.7574	8268
40.7741	9063
40.7908	10183
40.8075	8794
40.8242	7902
40.8409	10186
40.8576	7924
40.8743	12654
40.891	13903
40.9077	16452
40.9244	16677
40.9411	16697
40.9578	17093
40.9745	15927
40.9912	14265
41.0079	15760
41.0246	15411
41.0413	15093
41.058	14973
41.0747	17668
41.0914	20793
41.1081	22287
41.1248	18649
41.1415	19263
41.1582	21091
41.1749	21674
41.1916	20617
41.2083	23761
41.225	22817
41.2417	20229
41.2584	19918
41.2751	17234
41.2918	18540
41.3085	19355
41.3252	18423
41.3419	16843
41.3586	17631
41.3753	15690
41.392	15845
41.4087	16206
41.4254	15184
41.4421	15364
41.4588	14020
41.4755	14869
41.4922	16149
41.5089	16937
41.5256	19402
41.5423	23625
41.559	19272
41.5757	20610
41.5924	21745
41.6091	22649
41.6258	22544
41.6425	20007
41.6592	19187
41.6759	20042
41.6926	19113
41.7093	18586
41.726	16885
41.7427	13710
41.7594	13854
41.7761	13201
41.7928	13037
41.8095	14696
41.8262	13886
41.8429	15399
41.8596	13761
41.8763	14335
41.893	14860
41.9097	14669
41.9264	14073
41.9431	13896
41.9598	13451
41.9765	13497
41.9932	13294
42.0099	13611
42.0266	14331
42.0433	14160
42.06	14823
42.0767	15503
42.0934	13925
42.1101	14760
42.1268	14063
42.1435	9885
42.1602	11338
42.1769	8940
42.1936	9102
42.2103	10712
42.227	12038
42.2437	11188
42.2604	11599
42.2771	14358
42.2938	17587
42.3105	16865
42.3272	13637
42.3439	21824
42.3606	24539
42.3773	21239
42.394	21065
42.4107	23796
42.4274	23508
42.4441	23075
42.4608	22124
42.4775	20077
42.4942	18945
42.5109	20079
42.5276	19624
42.5443	18383
42.561	19762
42.5777	19810
42.5944	17134
42.6111	19951
42.6278	22484
42.6445	22145
42.6612	24086
42.6779	31720
42.6946	32742
42.7113	33591
42.728	32190
42.7447	30239
42.7614	28391
42.7781	25942
42.7948	26480
42.8115	24962
42.8282	22746
42.8449	20977
42.8616	19088
42.8783	18281
42.895	16142
42.9117	16077
42.9284	16862
42.9451	16354
42.9618	16545
42.9785	16787
42.9952	16262
43.0119	14243
43.0286	12593
43.0453	13136
43.062	19284
43.0787	19830
43.0954	17060
43.1121	17503
43.1288	15864
43.1455	18263
43.1622	17471
43.1789	15473
43.1956	15383
43.2123	15494
43.229	14975
43.2457	14727
43.2624	14490
43.2791	12237
43.2958	11453
43.3125	14434
43.3292	13958
43.3459	13650
43.3626	14010
43.3793	11212
43.396	8976
43.4127	7615
43.4294	12646
43.4461	16600
43.4628	12878
43.4795	17775
43.4962	14602
43.5129	15257
43.5296	18616
43.5463	17302
43.563	19150
43.5797	20254
43.5964	17841
43.6131	18454
43.6298	19068
43.6465	15897
43.6632	21755
43.6799	16953
43.6966	19404
43.7133	17408
43.73	19859
43.7467	20532
43.7634	17510
43.7801	17866
43.7968	22399
43.8135	24624
43.8302	23857
43.8469	24304
43.8636	25035
43.8803	22467
43.897	21565
43.9137	21219
43.9304	21046
43.9471	20860
43.9638	20968
43.9805	21127
43.9972	19969
44.0139	18259
44.0306	18443
44.0473	18226
44.064	16983
44.0807	15760
44.0974	14539
44.1141	12593
44.1308	12207
44.1475	13212
44.1642	12992
44.1809	11767
44.1976	12275
44.2143	13964
44.231	14193
44.2477	14297
44.2644	15525
44.2811	18219
44.2978	18406
44.3145	19046
44.3312	18478
44.3479	14790
44.3646	14881
44.3813	16977
44.398	16964
44.4147	16230
44.4314	21078
44.4481	21778
44.4648	23409
44.4815	23722
44.4982	22474
44.5149	21479
44.5316	21093
44.5483	20575
44.565	18072
44.5817	14944
44.5984	15023
44.6151	13856
44.6318	13268
44.6485	11214
44.6652	12899
44.6819	12319
44.6986	11666
44.7153	12533
44.732	12425
44.7487	14485
44.7654	14939
44.7821	15330
44.7988	12664
44.8155	17101
44.8322	19665
44.8489	21193
44.8656	28464
44.8823	25641
44.899	25102
44.9157	26744
44.9324	23254
44.9491	23262
44.9658	22032
44.9825	20841
44.9992	21781
45.0159	22224
45.0326	21584
45.0493	19183
45.066	16807
45.0827	18111
45.0994	16915
45.1161	15286
45.1328	14414
45.1495	13629
45.1662	13727
45.1829	12453
45.1996	14315
45.2163	14053
45.233	14942
45.2497	15015
45.2664	9974
45.2831	7950
45.2998	16965
45.3165	18919
45.3332	18862
[truncated: 10,243 more rows]

## Sheet: B
Normalized bioluminescence
	BSL						2hOnOff
Time [hrs]	1MS250	2MS251	A1981	A1985	A9461	A9463	1MS250	2MS251	A1981	A1985	A9461	A9463
72.25	1.14679	1.11924	1.04046	0.932997	1.06306	0.994329
72.75	1.34802	1.04516	1.30206	0.761041	1.03053	0.941873
73.25	1.29386	1.10721	1.37509	0.901732	0.957595	0.967779
73.75	1.09691	1.20936	1.37737	0.70572	0.848769	0.940864
74.25	1.09246	1.06484	0.868147	0.780109	0.886219	0.942854	0.808572	0.749969	0.506066	0.758705	0.864372	0.832463
74.75	1.17145	1.07284	1.07198	0.677266	0.802894	0.869022	0.98295	0.636729	0.460536	0.644851	0.716582	0.733591
75.25	0.962742	1.00835	0.852847	0.63086	1.0713	0.816375	1.11077	0.565312	0.434799	0.700339	0.742411	0.662945
75.75	1.00694	0.883115	0.832243	0.65094	1.01097	0.722966	0.945921	0.572544	0.547636	0.825135	0.741513	0.699343
76.25	0.965727	0.883169	0.900312	0.551068	0.961097	0.780541
76.75	0.839873	0.856066	0.721969	0.537589	0.797579	0.650408
77.25	0.63821	0.697664	0.642867	0.550184	0.675585	0.781302
77.75	0.661881	0.644873	0.602686	0.457261	0.683274	0.578301
78.25	0.660467	0.638903	0.514697	0.507965	0.670152	0.516231	0.758593	0.544382	0.508699	0.601868	0.516703	0.553713
78.75	0.631865	0.584612	0.689706	0.427886	0.665001	0.559416	0.758834	0.505256	0.459183	0.511153	0.543258	0.56866
79.25	0.769247	0.506326	0.484577	0.473633	0.581435	0.476704	0.815035	0.489461	0.555265	0.625348	0.579559	0.55557
79.75	0.72167	0.496968	0.452035	0.555634	0.629367	0.481667	0.81508	0.469173	0.671572	0.707074	0.61758	0.611514
80.25	0.57588	0.686371	0.44847	0.427614	0.696407	0.491745
80.75	0.56219	0.591262	0.725937	0.484191	0.728157	0.479481
81.25	0.595887	0.550402	0.550679	0.517761	0.783413	0.500879
81.75	0.548113	0.62297	0.29065	0.683391	0.740115	0.535136
82.25	0.598715	0.597708	0.463908	0.618867	0.846584	0.605192	0.993767	0.706799	0.711317	0.812479	0.621771	0.847294
82.75	0.643027	0.639544	0.659895	0.777974	0.892439	0.749606	1.01662	0.584329	0.769529	0.862271	0.738614	0.85866
83.25	0.64425	0.660695	0.544037	0.759881	0.734852	0.679801	0.97691	0.746032	0.802885	1.07065	0.894649	0.906808
83.75	0.630607	0.803094	0.789721	0.757558	0.764735	0.949914	1.14091	0.92508	1.26305	1.51234	0.970058	1.04157
84.25	0.693771	0.865067	0.614275	1.12632	0.7757	0.915882
84.75	0.717112	0.89494	0.883929	1.03116	0.796726	0.857841
85.25	0.695746	0.862281	0.967625	0.977831	0.800781	1.00175
85.75	0.719983	0.934381	0.973285	1.00099	0.763086	1.09687
86.25	0.697524	0.896283	0.853667	1.03319	0.944816	1.07263	1.28784	0.887043	0.757776	1.11265	0.854213	1.14404
86.75	0.779437	0.896189	1.13531	0.994707	0.952336	1.10119	1.27261	0.776872	0.827104	0.998226	0.944118	1.12732
87.25	0.923878	1.04068	0.934233	0.97514	1.07587	1.35726	1.35037	0.784933	0.771596	1.57403	1.0814	1.11174
87.75	0.80881	1.11566	1.22023	1.11416	1.09355	1.4294	1.45418	1.01464	0.761483	1.11579	1.26294	1.22185
88.25	0.932826	1.17692	1.22536	1.15138	1.19725	1.83984
88.75	1.02658	1.20266	0.919328	1.22217	1.35806	1.55277
89.25	0.963468	1.30125	1.37565	1.25915	1.43488	1.65095
89.75	1.11325	1.38497	1.19725	1.31104	1.38093	1.56472
90.25	1.21306	1.53393	1.22972	1.36124	1.60063	1.74825	1.44218	0.955058	1.06437	1.37556	0.984456	1.31183
90.75	1.11746	1.40616	1.61881	1.21927	1.37132	1.38553	1.62974	0.651006	1.03781	1.09849	0.867586	1.31825
91.25	1.11988	1.12731	1.10175	1.12766	1.44456	1.27909	1.72574	0.710102	1.2335	1.70494	1.46536	1.30602
91.75	1.1592	1.72909	1.5121	1.25461	1.743	1.37032	1.73506	0.770782	1.10062	2.02774	1.32852	1.17562
92.25	1.15268	1.37578	1.26149	1.23813	1.61026	1.3052
92.75	0.976938	1.43449	1.35014	1.3957	1.45635	1.41791
93.25	0.938677	1.58188	1.11803	1.52565	1.53377	1.27254
93.75	1.04404	1.37665	1.75532	1.12851	1.45889	1.23978
94.25	1.07127	1.40979	1.12856	1.15616	1.39254	1.19597	1.45402	1.30453	1.13341	1.13258	1.13211	1.26363
94.75	1.10989	1.25553	1.49903	1.17616	1.34723	0.982624	1.45943	1.16261	1.08601	0.924765	1.1332	1.19839
95.25	0.971118	1.07012	1.0548	1.03525	1.38305	0.957416	1.45082	1.26856	0.956024	1.34521	1.27157	1.05769
95.75	0.915291	1.01468	1.26272	0.874792	1.38695	1.0733	1.36709	1.10357	0.970207	1.27	1.17083	1.17085
96.25	0.947344	0.950885	1.33743	1.10191	1.49175	1.03977
96.75	0.891341	0.855768	0.91294	1.13741	1.61865	1.00909
97.25	0.837501	1.06703	1.31316	1.15356	1.53542	0.979976
97.75	0.886113	1.03444	0.995559	0.927481	1.26304	1.06615
98.25	0.720372	0.904877	1.2652	0.826194	1.20285	1.02476	0.926235	0.896509	0.971418	0.684482	0.881882	1.01017
98.75	0.874412	0.876615	0.864586	0.903449	1.27437	1.02053	0.919738	0.74574	0.880908	0.5792	0.688456	0.78716
99.25	0.905239	0.865785	1.41638	0.774485	1.1319	0.986682	0.773191	0.638481	0.895547	0.667253	0.718642	0.710905
99.75	0.760929	0.726429	1.09848	0.668117	0.983147	0.768542	0.804688	0.848907	0.979796	0.528006	0.67163	0.680913
100.25	0.74242	1.02627	1.04636	0.759379	0.96821	0.761392
100.75	0.728357	0.735226	0.824585	0.744715	0.914574	0.659591
101.25	0.803174	0.674201	0.907259	0.733076	0.781934	0.528816
101.75	0.749214	0.588448	0.672682	0.542233	0.838092	0.496836
102.25	0.831073	0.56167	0.506147	0.689886	0.68257	0.409006	0.617207	0.613129	0.599483	0.367707	0.643086	0.598281
102.75	0.847221	0.666243	0.760934	0.735908	0.637315	0.553361	0.680516	0.584527	0.554667	0.317602	0.557871	0.579896
103.25	0.771786	0.558548	0.620432	0.724539	0.693289	0.542922	0.685088	0.675736	0.596505	0.375777	0.58754	0.555022
103.75	0.899379	0.54173	0.457847	0.708025	0.73427	0.49494	0.721738	0.637459	0.651837	0.517215	0.521303	0.563235
104.25	0.864717	0.573535	0.723477	0.586785	0.802474	0.679561
104.75	0.721241	0.629568	0.558557	0.663339	0.724229	0.657951
105.25	0.8953	0.814578	0.524293	0.605961	0.616233	0.717487
105.75	0.951378	0.747491	0.540461	0.650389	0.648111	0.588844
106.25	0.801529	0.664432	0.506994	0.689901	0.721128	0.750467	0.871132	0.88558	0.698535	0.595644	0.768574	0.719014
106.75	0.896494	0.73538	0.540433	0.774891	0.777876	0.790708	0.980376	0.831344	0.779284	0.651151	0.691553	0.808437
107.25	0.734532	0.794794	0.555123	0.844954	0.786124	0.691352	1.01731	1.08186	0.684081	1.07382	0.832631	0.735666
107.75	0.881807	0.761077	0.822542	0.807044	0.880951	0.877559	1.04693	1.14117	1.0005	1.30092	1.04961	0.842671
108.25	0.662766	0.808364	0.548191	0.759169	0.833548	0.808672
108.75	0.854454	0.8394	0.788863	0.901293	0.768517	0.836689
109.25	0.79693	0.833438	0.849866	0.988509	0.827987	0.962557
109.75	0.920817	1.03791	0.864213	1.02565	0.915818	1.05064
110.25	0.946414	0.929057	0.841637	1.14554	1.00793	1.01549	1.2149	0.915702	0.869085	0.891179	0.843686	1.22372
110.75	1.01579	0.990185	0.717259	1.19955	1.15691	1.11443	1.36795	1.02935	0.821682	1.05253	0.88595	1.02003
111.25	1.14883	1.0452	1.05237	1.08712	1.16024	1.08574	1.57792	1.18118	0.809749	1.24683	1.01021	0.955544
111.75	1.13752	0.97571	0.948688	1.12198	1.1811	1.33239	1.22655	1.36911	0.960791	1.23505	1.09288	1.08374
112.25	1.34298	1.10948	1.0032	1.27496	1.14245	1.36801
112.75	1.11196	1.1541	1.08099	1.35879	1.26878	1.25594
113.25	1.1499	1.05733	1.11537	1.27646	1.35719	1.43723
113.75	1.38186	1.39155	1.36366	1.3167	1.3367	1.51287
114.25	1.33651	1.32732	1.24623	1.35894	1.34639	1.34795	1.20271	1.21276	1.37789	1.59604	1.29738	1.20996
114.75	1.24689	1.39796	1.16304	1.33569	1.5294	1.37739	1.58259	1.11982	1.50237	1.20959	1.16325	1.1221
115.25	1.29655	1.21074	1.2202	1.50588	1.52515	1.72245	1.82338	1.39644	1.25122	1.87631	1.00132	1.20001
115.75	1.20123	1.14432	1.40018	1.67516	1.5226	1.47307	1.38653	1.56599	1.45137	1.51284	1.0229	1.11777
116.25	1.28524	1.20451	1.16036	1.63914	1.47205	1.33668
116.75	1.44902	1.26669	1.42345	1.31204	1.54598	1.35806
117.25	1.234	1.07652	1.43245	1.66022	1.46665	1.11478
117.75	1.23441	1.10163	1.16614	1.39397	1.42058	1.0019
118.25	1.17419	1.30034	1.16531	1.46769	1.29411	1.01992	1.28398	1.20016	1.13557	1.27125	1.00729	1.15095
118.75	1.19185	1.12046	1.54992	1.43256	1.42062	1.30857	1.32555	1.15344	1.25706	1.11902	1.03116	0.986843
119.25	1.16574	0.945174	1.10678	1.67231	1.42199	1.10231	1.31778	1.20749	1.39018	1.08899	0.829081	1.12937
119.75	1.34269	0.917781	1.04772	1.46547	1.44799	1.20511	1.18818	1.19043	1.15453	1.19445	0.91542	0.965821

## Sheet: C
amplitude change [rel biol, a.u.]	BSL	2hOnOff	REC
1MS250	0.256273	0.414134	0.342291
2MS251	0.385311	0.274931	0.434885
A1981	0.400529	0.307669	0.39654
A1985	0.399816	0.472069	0.382687
A9461	0.414447	0.28512	0.343546
A9463	0.434498	0.31977	0.363598

## Sheet: D
Time awake [min] / hr
	Baseline								Sleep Deprivation
Time[hrs]	OF1MS255	OF2MS256	OF3MS252	OFA1951	OFA9152	OFA1953	OFA9462	OFA9464	OF1MS255	OF2MS256	OF3MS252	OFA1951	OFA9152	OFA1953	OFA9462	OFA9464
72.5	55.47	16.87	39.13	59.13	31.07	20.8	32.07	17.07	60	58.8	59.07	60	58.07	60	59.47	57.93
73.5	6.67	29.13	45	20.87	38.93	43.53	27.33	32.73	53.73	59.2	34.2	60	57.87	60	58.4	48.27
74.5	25.73	16.87	5.07	9.47	14.6	11	39.67	23.2	16.8	29.53	3.87	45.8	27.07	36.8	17.2	29.8
75.5	25.47	33.53	34.8	47.33	24.93	39.2	8.47	18.47	44.87	21.47	34.93	13.33	24.87	9.87	26.8	6.8
76.5	29.4	16.53	3.8	10.2	33.33	26.47	23.93	21.73	57.2	58.67	53.47	56.93	52.27	53.87	58.47	46.53
77.5	14.67	20.67	36.2	23.73	12.93	11.6	58.93	8.27	58.27	58.53	51.47	59.73	54.13	60	59.6	54.73
78.5	10.07	12.2	12.2	10.6	29.2	25	16.53	11.53	15.2	20.93	3.6	9.73	6.67	20.27	10.13	9.4
79.5	37.73	19.93	8.53	31.2	27.8	32.47	35.4	41.53	19.53	6	29.87	49.8	40.27	26.07	9.07	28.73
80.5	32.2	18	35.87	24.2	22.93	7.8	7.47	24.93	57	58.93	51.53	44.27	45.47	57.27	58.67	25.6
81.5	7.33	19.13	33.27	37.53	24.13	27.27	31.13	13.13	58.8	59.4	56.07	56.33	43.47	56.67	56.87	59.13
82.5	24.4	41.13	17.87	32.87	28.2	25.67	31.53	36.8	37.47	30.53	23.53	23.13	15.8	21.53	15.67	16
83.5	14.27	32.8	48.87	36.73	29.4	56.13	33.73	40.6	5.67	52.87	47.47	18.53	27.2	22.2	21.27	32.8
84.5	30.07	50.6	60	59.4	39.07	33.4	41.73	34	59.67	58.73	59.53	54	33.6	60	58.87	60
85.5	35.47	29	59.2	57.33	47.53	48.93	42.47	40.87	59.33	59	58	54.53	45.4	60	58.73	57.73
86.5	49.73	31.93	59.67	24.73	34.53	30.93	28.73	37.87	54.4	29.13	54.73	48.8	34.8	38.8	33	33.87
87.5	32.4	49.27	59.33	35.53	30.2	34.87	33.07	35.27	60	27.2	58.4	27.33	14	42.53	35.93	40.07
88.5	39.27	33.93	31.2	55.07	39.53	36.8	57.07	44.13	59	59.87	50.4	52.93	48.6	59.33	60	51.8
89.5	26.93	29.6	60	13.8	37.53	57.2	29.93	30.73	60	60	58.27	57.2	44.2	59.2	57.53	54.27
90.5	43.73	46.33	35.13	42.67	26.73	27.53	53.73	42.6	48.67	25.67	50.33	19.47	49.8	38.87	8.33	18.87
91.5	37.33	43	60	47.73	19.07	44.47	29.2	28.73	6.6	27.6	37.13	9.8	19.13	23.87	54.67	32.6
92.5	27.93	31.07	30.4	10.67	43.87	34.6	46.87	60	58.8	58.8	57.73	58.4	52.8	59.67	59.27	57.33
93.5	60	35.93	49.87	59.6	17.33	36.8	60	29.27	59.67	53.8	56.87	54.73	48.53	57.6	59.6	58.73
94.5	35.13	46.2	36.8	59.27	49.47	52.73	29.87	44.8	34.8	8.93	30.33	51.6	30.13	28.2	25.2	46.07
95.5	33.67	30.6	29.93	49.8	38.47	22.87	33.93	41.2	32.13	29.8	33.47	4.67	27.2	33.33	42.8	15
96.5	59.87	6.13	26.27	10.6	31.13	14.93	34.47	23.73	43.33	57.93	50.93	59.53	50.33	31	56.87	28
97.5	11.2	32.07	13.13	16.27	18.13	43.33	31.33	27.8	46.27	53.67	45.4	57.73	36.87	6.47	57	57.8
98.5	34.73	18	36.8	41.07	26.87	7.8	9.53	39.4	25.4	18.27	44.67	28.53	21.67	41.07	19.33	9.47
99.5	23.33	14.93	30.87	21.87	27.13	10.93	38.8	5.2	22.73	5.67	19.8	4.73	23.53	4.8	36.27	34.67
100.5	7.73	33.33	24.73	4.6	4.2	10.8	18.2	35	43.27	53.13	43	54.2	47.53	14.87	55.8	54.33
101.5	25.8	9.2	18.47	10.27	51.27	43.53	56.93	7.53	44.8	51.4	46.6	55.8	50.13	25.07	57.4	48.8
102.5	19.8	8.47	36.53	6.07	3.93	12.73	12.6	27.53	16.4	5.07	3.33	23.73	18.87	21.67	28.6	7.53
103.5	26.33	24.93	5.47	35.4	30.47	8	12.47	6.2	18.93	5.67	17.33	4.27	13.33	22.73	4.87	3.27
104.5	11.47	13.07	31	23.93	16.67	16.93	23.87	39.67	55.8	50.67	47.87	54.53	50.87	5.13	56.07	42.07
105.5	20	31.8	31.13	24.67	16.27	24.53	22.2	14.73	55.07	49.27	40.2	53.93	51.53	42.8	58.8	26.47
106.5	23.53	31.07	25.53	35.73	26.67	23.53	33.67	42.07	19.4	45.8	20.2	19.8	27.67	13.27	19.33	29.6
107.5	30.07	40.13	43.73	37.13	37.07	34.93	28.8	29.53	7	53.2	54.87	36.13	21.2	50.8	30	34.87
108.5	15.6	39.4	59.6	58.73	41.13	44.8	48.2	39.47	56.53	57.2	56.07	51.4	39.53	48.27	59.4	50.33
109.5	48.6	33.53	60	26.4	46.93	35.87	41.93	43.33	57.4	54.67	59.53	54	52.67	32.33	59.67	55.8
110.5	25.8	43.13	50.8	23.87	35.13	32	41.13	32.4	51.33	43.4	59.47	17.93	32.33	39.13	40.67	41.53
111.5	51.93	38.67	37.8	50.53	41.07	36.33	19.13	50.87	60	25.6	52.6	37.87	29.6	44.47	25.47	42.07
112.5	35.87	44.13	60	11.47	38.87	32.93	60	32.07	57.53	60	54.73	49	46.07	36.4	58.73	52.4
113.5	39.6	9.93	33.67	43.47	45.33	36.6	21.67	38.93	59.13	57.87	56.07	53.4	53.07	45.4	59.27	52
114.5	31.07	60	44.33	40.53	29.73	41.73	48.47	52.53	55	34.27	40.07	22.53	24.4	32.2	36.6	22.07
115.5	53.4	16.47	37.67	9.87	40.87	60	25.6	11	27.07	28.27	45.07	40.07	36.47	44.93	21.47	17.4
116.5	27.33	60	41.4	60	34	24.2	56.93	37.67	59.33	53.53	49.27	47.47	53.67	18	59.8	60
117.5	38.07	20	46.13	14.47	36.53	47.93	60	60	58	56.6	56.2	50.27	48.07	34.27	59.47	58.87
118.5	51.07	36.13	40	60	28.73	27.13	45.4	32.93	34.6	34.2	27.07	13.53	28.93	23.8	29.2	33.4
119.5	31.53	26.6	23.4	54.2	52.6	11.47	23.8	36.4	31.8	5.07	44.8	21.93	25.33	3.87	31.93	6.07

## Sheet: E
amplitude change [min]	BSL	2hOnOff	REC
OF1MS255	10.2413	9.18262	11.1886
OF2MS256	10.6068	6.52395	10.8691
OF3MS252	15.9026	11.1052	12.6721
OFA9151	10.0057	1.45741	7.65332
OFA9152	7.71333	3.66729	9.24195
OFA9153	10.7694	9.03777	11.4162
OFA9462	8.64292	5.01122	9.9611
OFA9464	9.72527	6.1264	9.9419
