# Supplementary material for: The sleep-wake distribution contributes to the peripheral rhythms in PERIOD-2
Source: eLife. 2021 Dec 13;10:e69773. doi: 10.7554/eLife.69773 (PMC8798053; doi:10.7554/eLife.69773)
Supplement: Figure 4—figure supplement 1—source data 1. [file elife-69773-fig4-figsupp1-data1.xlsx]

## Sheet: RSS
	Waking	LMA
Peripheral	1.79	1.87
Central	2.64	2.66
