# Supplementary material for: The sleep-wake distribution contributes to the peripheral rhythms in PERIOD-2
Source: eLife. 2021 Dec 13;10:e69773. doi: 10.7554/eLife.69773 (PMC8798053; doi:10.7554/eLife.69773)
Supplement: Figure 4—figure supplement 2—source data 1. [file elife-69773-fig4-figsupp2-data1.xlsx]

## Sheet: C
Phase advance	delta PER2 amplitude
0	-0.0227879
0.1	-0.0227129
0.2	-0.0225652
0.3	-0.0223453
0.4	-0.0220542
0.5	-0.0216926
0.6	-0.0212611
0.7	-0.0207607
0.8	-0.020192
0.9	-0.0195558
1	-0.0188529
1.1	-0.018084
1.2	-0.0172497
1.3	-0.0163511
1.4	-0.0153887
1.5	-0.0143635
1.6	-0.0132762
1.7	-0.0121277
1.8	-0.0109188
1.9	-0.00965036
2	-0.00832327
2.1	-0.00693843
2.2	-0.00549679
2.3	-0.00399929
2.4	-0.00244691
2.5	-0.000840688
2.6	0.000818343
2.7	0.00252959
2.8	0.00429129
2.9	0.00610263
3	0.00796246
3.1	0.00986963
3.2	0.011823
3.3	0.0138212
3.4	0.0158632
3.5	0.0179476
3.6	0.0200731
3.7	0.0222385
3.8	0.0244424
3.9	0.0266835
4	0.0289603
4.1	0.0312708
4.2	0.0336145
4.3	0.0359898
4.4	0.038395
4.5	0.0408285
4.6	0.0432889
4.7	0.0457747
4.8	0.0482842
4.9	0.050816
5	0.0533684
5.1	0.0559398
5.2	0.0585287
5.3	0.0611333
5.4	0.0637521
5.5	0.0663833
5.6	0.0690251
5.7	0.0716771
5.8	0.0743361
5.9	0.077001
6	0.0796701

## Sheet: D
Time[hrs]	Activity	Wake	F_act+peri		Time[hrs]	Central Bioluminescence
-11.9	50.75	0.042778	0.887894		-11.5	1.46794
-11.8	130.25	0.069444	0.894848		-11	1.00369
-11.7	99.25	0.077778	0.901964		-10.5	0.837628
-11.6	79.25	0.053056	0.909248		-10	1.1029
-11.5	27.5	0.030556	0.916603		-9.5	1.26685
-11.4	29	0.050278	0.923872		-9	1.17478
-11.3	131.25	0.085	0.930996		-8.5	1.17756
-11.2	151	0.093611	0.93822		-8	1.34004
-11.1	60.25	0.040833	0.945696		-7.5	1.18204
-11	55.75	0.041944	0.953214		-7	1.08881
-10.9	88.75	0.073333	0.960647		-6.5	1.29709
-10.8	83.5	0.045556	0.968063		-6	1.16212
-10.7	69.25	0.054167	0.975481		-5.5	1.17263
-10.6	105.25	0.061944	0.982853		-5	1.16494
-10.5	131.75	0.083611	0.99024		-4.5	1.15651
-10.4	153.25	0.0725	0.997736		-4	1.00273
-10.3	68.5	0.050556	1.00541		-3.5	1.13049
-10.2	138.25	0.088333	1.01306		-3	1.17215
-10.1	148.25	0.071667	1.02076		-2.5	0.873264
-10	142	0.075833	1.02858		-2	0.747401
-9.9	133	0.089722	1.03652		-1.5	0.631774
-9.8	173	0.087778	1.04451		-1	0.81194
-9.7	105.75	0.056944	1.05264		-0.5	0.913804
-9.6	116.75	0.066667	1.06077		0	0.935458
-9.5	96.5	0.063056	1.06883		0.5	0.890245
-9.4	46.25	0.039167	1.07677		1	0.770568
-9.3	119	0.069722	1.08446		1.5	0.731814
-9.2	72	0.067778	1.09199		2	0.738758
-9.1	104	0.055556	1.09933		2.5	0.644545
-9	96	0.061389	1.10651		3	0.704916
-8.9	106	0.0675	1.11353		3.5	0.644865
-8.8	141.25	0.081667	1.12041		4	0.649448
-8.7	136.25	0.073056	1.12722		4.5	0.619503
-8.6	199.25	0.1	1.13399		5	0.578764
-8.5	233	0.092222	1.14086		5.5	0.59376
-8.4	199.5	0.094722	1.14794		6	0.620476
-8.3	201.25	0.091389	1.15519		6.5	0.619918
-8.2	169.5	0.086111	1.16254		7	0.689231
-8.1	97.75	0.0425	1.16989		7.5	0.660403
-8	92.75	0.060833	1.17702		8	0.567583
-7.9	173.75	0.09	1.18384		8.5	0.58568
-7.8	114.75	0.056111	1.19051		9	0.636872
-7.7	124.25	0.083611	1.197		9.5	0.675448
-7.6	75	0.045556	1.20324		10	0.614816
-7.5	96.5	0.046111	1.20912		10.5	0.654332
-7.4	83.75	0.056111	1.21464		11	0.64687
-7.3	107.25	0.070833	1.2198		11.5	0.687856
-7.2	81.25	0.054722	1.22463		12	0.742116
-7.1	160.5	0.077778	1.22911		12.5	0.92091
-7	102.75	0.064444	1.2334		13	1.15172
-6.9	103.75	0.0575	1.23744		13.5	1.41604
-6.8	140.5	0.080556	1.24117		14	1.41892
-6.7	55	0.0475	1.24469		14.5	1.27916
-6.6	77.5	0.055	1.24782		15	1.44079
-6.5	42.75	0.031944	1.25053		15.5	1.41952
-6.4	83.5	0.051667	1.25277		16	1.60456
-6.3	120.5	0.071111	1.25462		16.5	1.56326
-6.2	146.75	0.081667	1.2562		17	1.51197
-6.1	107.5	0.060278	1.25764		17.5	1.38675
-6	77.25	0.056389	1.25886		18	1.21609
-5.9	152.5	0.0875	1.25975		18.5	1.30795
-5.8	180.75	0.072222	1.26047		19	1.22865
-5.7	177.5	0.0775	1.26116		19.5	1.32864
-5.6	152.75	0.078056	1.26184		20	1.28642
-5.5	144.25	0.068333	1.26245		20.5	1.21568
-5.4	130.25	0.068056	1.26292		21	0.945764
-5.3	102	0.054722	1.26321		21.5	1.04627
-5.2	89.25	0.066944	1.26324		22	1.21434
-5.1	130.75	0.076667	1.26296		22.5	1.02737
-5	93.25	0.0625	1.26243		23	0.943568
-4.9	48.25	0.039444	1.26164		23.5	0.870228
-4.8	74.25	0.0525	1.26044		24	0.870991
-4.7	90	0.0625	1.25885		24.5	0.8517
-4.6	42.5	0.033056	1.25695		25	0.738839
-4.5	38.25	0.043333	1.25465		25.5	0.659819
-4.4	139.25	0.066389	1.25191		26	0.655923
-4.3	40.25	0.036111	1.24897		26.5	0.703008
-4.2	110	0.060833	1.24572		27	0.740755
-4.1	91	0.070556	1.24223		27.5	0.655465
-4	87.25	0.0525	1.23855		28	0.630806
-3.9	113.5	0.068056	1.23464		28.5	0.698084
-3.8	144.75	0.074444	1.23057		29	0.67237
-3.7	151.5	0.091667	1.22646		29.5	0.625362
-3.6	80.5	0.045833	1.22236		30	0.677714
-3.5	85.75	0.050833	1.2181		30.5	0.677096
-3.4	96.25	0.050833	1.21363		31	0.652849
-3.3	42.5	0.040556	1.20897		31.5	0.701117
-3.2	51.5	0.041667	1.20403		32	0.710466
-3.1	42.5	0.043056	1.19878		32.5	0.705639
-3	29.5	0.041111	1.19321		33	0.697573
-2.9	72.5	0.049167	1.18731		33.5	0.595157
-2.8	9.75	0.0375	1.18118		34	0.648972
-2.7	42.5	0.051389	1.17474		34.5	0.634555
-2.6	28	0.032222	1.168		35	0.603945
-2.5	30.75	0.033333	1.16099		35.5	0.661898
-2.4	74.25	0.053889	1.15371		36	0.719588
-2.3	55.75	0.05	1.14629		36.5	0.928418
-2.2	46.25	0.046667	1.13875		37	1.26336
-2.1	15	0.016111	1.13105		37.5	1.3591
-2	40.5	0.035	1.12313		38	1.43159
-1.9	19.5	0.026944	1.11502		38.5	1.43791
-1.8	62.5	0.050278	1.10671		39	1.49209
-1.7	54.25	0.039444	1.09832		39.5	1.36911
-1.6	61.5	0.056667	1.08987		40	1.2868
-1.5	80	0.0425	1.08138		40.5	1.58239
-1.4	99	0.05	1.07292		41	1.24888
-1.3	84.25	0.062222	1.06456		41.5	1.19861
-1.2	91	0.071667	1.05628		42	1.33136
-1.1	139.25	0.088333	1.0481		42.5	1.25706
-1	140.75	0.062778	1.04014		43	1.17067
-0.9	93.5	0.058611	1.03244		43.5	1.2306
-0.8	41	0.043611	1.0249		44	1.21485
-0.7	31.25	0.032222	1.01734		44.5	1.10596
-0.6	52	0.038611	1.00967		45	1.09197
-0.5	94.75	0.0575	1.00195		45.5	1.23268
-0.4	67	0.058056	0.994316		46	1.02695
-0.3	77.25	0.060556	0.986744		46.5	0.918828
-0.2	62.75	0.066111	0.979234		47	0.968159
-0.1	151.5	0.071389	0.971768		47.5	1.00629
0	136.25	0.061389	0.964542		48	1.02132
0.1	111.5	0.054444	0.957619		48.5
0.2	70.25	0.044444	0.950913		49
0.3	16.25	0.023611	0.944291		49.5
0.4	18.75	0.022778	0.93758		50
0.5	2.75	0.015833	0.930731		50.5
0.6	35.25	0.027778	0.923722		51
0.7	75	0.052778	0.916625		51.5
0.8	79.75	0.070278	0.909582		52
0.9	73	0.0725	0.902656		52.5
1	101.75	0.048611	0.895838		53
1.1	32.75	0.028889	0.889189		53.5
1.2	58	0.044167	0.882578		54
1.3	46	0.032778	0.875989		54.5	1.27569
1.4	58.5	0.049167	0.869429		55	0.951909
1.5	47.25	0.038611	0.862921		55.5	0.858465
1.6	72.75	0.040278	0.856455		56	0.823406
1.7	56	0.041667	0.850086		56.5	0.785951
1.8	59.25	0.045833	0.843806		57	0.791399
1.9	23.75	0.029167	0.837607		57.5	0.765189
2	7.5	0.018611	0.831412		58	0.786973
2.1	39.5	0.038056	0.825149		58.5	0.769979
2.2	67.75	0.061389	0.818887		59	0.758302
2.3	61	0.074167	0.812738		59.5	0.751971
2.4	62.75	0.051111	0.806723		60	0.760575
2.5	55.5	0.049167	0.800841		60.5	0.875737
2.6	56.75	0.045556	0.795079		61	0.911814
2.7	29.25	0.040278	0.789435		61.5	1.08698
2.8	22.25	0.030278	0.783848		62	1.20328
2.9	7	0.020278	0.778276		62.5	1.15195
3	16.75	0.015556	0.772684		63	1.17527
3.1	52	0.039444	0.767087		63.5	1.1755
3.2	26.75	0.039722	0.761591		64	1.16647
3.3	45.5	0.038889	0.756183		64.5	1.14494
3.4	32	0.020278	0.750884		65	1.11002
3.5	49.5	0.0425	0.745688		65.5	1.17151
3.6	125.5	0.068056	0.740628		66	1.08407
3.7	91.25	0.053611	0.735908		66.5	0.978042
3.8	64.25	0.031667	0.731529		67	1.25579
3.9	68.75	0.035556	0.727382		67.5	1.15846
4	51.75	0.045	0.723443		68	1.0563
4.1	42	0.035556	0.719677		68.5	1.0684
4.2	1.5	0.014167	0.716042		69	1.00803
4.3	6	0.018889	0.712434		69.5	0.982134
4.4	16.5	0.026944	0.708825		70	1.12717
4.5	8	0.013611	0.705255		70.5	1.11155
4.6	5	0.017222	0.701724		71	0.988542
4.7	33.75	0.030556	0.698223		71.5	1.04873
4.8	54.25	0.041111	0.694828		72	1.17987
4.9	67.5	0.041111	0.691624		72.5	1.05484
5	71	0.038333	0.68867		73	1.05209
5.1	57	0.058056	0.685988		73.5	1.08807
5.2	68	0.056667	0.683545		74	0.962644
5.3	77.5	0.059722	0.681351		74.5	0.885427
5.4	115	0.068056	0.679438		75	0.863616
5.5	40	0.059167	0.677902		75.5	0.836259
5.6	94.75	0.063333	0.6766		76	0.753473
5.7	87	0.0575	0.675571		76.5	0.777505
5.8	21.75	0.023056	0.674857		77	0.907712
5.9	59	0.0375	0.674286		77.5	0.810656
6	85.5	0.045	0.67387		78	0.756972
6.1	67.75	0.044167	0.673718		78.5	0.919712
6.2	48	0.028333	0.67381		79	0.896857
6.3	55.5	0.051667	0.674077		79.5	0.838846
6.4	58.5	0.050278	0.67451		80	0.762867
6.5	14.5	0.023333	0.675124		80.5	0.792767
6.6	16.5	0.034167	0.675816		81	0.786407
6.7	6.75	0.026111	0.676544		81.5	0.710125
6.8	14.5	0.030278	0.67729		82	0.701658
6.9	33.5	0.059722	0.678068		82.5	0.788733
7	54	0.035278	0.678938		83	0.808267
7.1	37.25	0.033889	0.679973		83.5	0.861101
7.2	2.75	0.012222	0.681157		84	0.887384
7.3	15.75	0.024444	0.682388		84.5	0.906161
7.4	2.5	0.019167	0.683663		85	1.01818
7.5	5	0.019167	0.68497		85.5	1.27299
7.6	30.5	0.037222	0.686305		86	1.39753
7.7	22.25	0.036944	0.687738		86.5	1.40792
7.8	47.25	0.040833	0.689283		87	1.23601
7.9	4	0.016944	0.690991		87.5	1.29198
8	55.5	0.046667	0.692788		88	1.23617
8.1	25	0.044167	0.69475		88.5	1.17188
8.2	47.75	0.031389	0.696864		89	1.29194
8.3	106.75	0.058056	0.699147		89.5	1.19966
8.4	136.75	0.083056	0.701764		90	1.27611
8.5	103.75	0.066389	0.704846		90.5	1.2649
8.6	34.75	0.051389	0.708332		91	1.16195
8.7	14	0.025833	0.712005		91.5	1.20914
8.8	9	0.018333	0.715732		92	1.34896
8.9	5	0.011944	0.719477		92.5	1.22597
9	20.75	0.027222	0.723227		93	1.18705
9.1	70.5	0.048611	0.72702		93.5	1.12885
9.2	54	0.047778	0.730993		94	1.00543
9.3	14.25	0.029167	0.735161		94.5	1.03057
9.4	6	0.02	0.739403		95	1.1324
9.5	4.75	0.011944	0.743653		95.5	1.22273
9.6	23	0.031111	0.747903		96	1.34449
9.7	58.75	0.052222	0.752196
9.8	88.75	0.080278	0.75664
9.9	110.25	0.076667	0.761343
10	102.5	0.082222	0.76638
10.1	87.75	0.064722	0.771745
10.2	43.5	0.036389	0.777377
10.3	8.25	0.025833	0.783142
10.4	1.5	0.018889	0.788898
10.5	1	0.018889	0.794589
10.6	4	0.016944	0.800208
10.7	7.5	0.022222	0.805764
10.8	51.25	0.046944	0.811272
10.9	50.75	0.049167	0.816842
11	60.5	0.049722	0.82252
11.1	87.5	0.069167	0.828323
11.2	99.25	0.056667	0.834319
11.3	92	0.043889	0.840557
11.4	63.75	0.039167	0.847019
11.5	60.5	0.049167	0.853617
11.6	73.5	0.045278	0.860299
11.7	88.75	0.060556	0.867085
11.8	54.5	0.044167	0.874017
11.9	40.25	0.040278	0.881019
12	84.5	0.055556	0.88801
12.1	121.25	0.07	0.895072
12.2	141.75	0.0775	0.902336
12.3	46	0.046389	0.909875
12.4	114.25	0.072222	0.917467
12.5	93.75	0.069722	0.925153
12.6	72.25	0.049722	0.932949
12.7	107.5	0.064444	0.940767
12.8	81.25	0.060556	0.948656
12.9	179.25	0.09	0.956582
13	146.25	0.082222	0.964734
13.1	54.5	0.056389	0.973127
13.2	72.75	0.072222	0.981483
13.3	83	0.079722	0.989727
13.4	104.5	0.070833	0.997899
13.5	82	0.073056	1.00605
13.6	78.75	0.063889	1.01415
13.7	101	0.071389	1.02215
13.8	120	0.075833	1.03008
13.9	157.75	0.074167	1.03802
14	88	0.065556	1.04606
14.1	76.75	0.063056	1.05406
14.2	128.25	0.081389	1.06191
14.3	167.75	0.088333	1.06969
14.4	111.75	0.069167	1.07757
14.5	99.75	0.064722	1.08542
14.6	114.5	0.064167	1.09315
14.7	135.25	0.078611	1.10076
14.8	141	0.085278	1.10832
14.9	115.75	0.070278	1.11585
15	167.25	0.079444	1.12328
15.1	80.25	0.055833	1.1307
15.2	74.5	0.062778	1.13794
15.3	51.75	0.050833	1.14488
15.4	120.25	0.066667	1.15146
15.5	153	0.063333	1.15782
15.6	220	0.090833	1.16411
15.7	262.75	0.098333	1.17052
15.8	206.75	0.097222	1.1772
15.9	204	0.088333	1.18404
16	202.75	0.094167	1.19096
16.1	231.25	0.091111	1.19791
16.2	204	0.092222	1.20494
16.3	149.75	0.060833	1.21201
16.4	141	0.063333	1.21893
16.5	155.5	0.091389	1.2256
16.6	212.25	0.098056	1.23205
16.7	268.5	0.1	1.23841
16.8	225.5	0.099444	1.24486
16.9	221.5	0.091944	1.25136
17	181.25	0.078889	1.25781
17.1	116.5	0.061944	1.2641
17.2	88.75	0.064722	1.27001
17.3	147.5	0.078056	1.27541
17.4	144.25	0.0725	1.2804
17.5	92.5	0.058611	1.28505
17.6	82.75	0.046667	1.28923
17.7	137.5	0.082778	1.29286
17.8	118.75	0.063056	1.29607
17.9	78	0.059722	1.29889
18	159.75	0.071111	1.30119
18.1	96.5	0.051111	1.30314
18.2	143.5	0.073056	1.3047
18.3	219	0.085	1.30589
18.4	172.25	0.071111	1.30697
18.5	104	0.053611	1.3079
18.6	161.25	0.076944	1.30846
18.7	128	0.065556	1.30872
18.8	80.25	0.0525	1.30866
18.9	82	0.042778	1.30816
19	137.25	0.083889	1.30715
19.1	52	0.036667	1.3058
19.2	44	0.026944	1.30397
19.3	132.75	0.085	1.30157
19.4	101.5	0.060833	1.29882
19.5	91.5	0.051667	1.29575
19.6	134	0.063889	1.29233
19.7	123.25	0.061667	1.28865
19.8	179.25	0.081389	1.28475
19.9	196.5	0.089444	1.28076
20	160.5	0.081944	1.27678
20.1	129.5	0.069167	1.27275
20.2	154.75	0.072778	1.26856
20.3	133	0.06	1.26423
20.4	83	0.039722	1.25974
20.5	56.75	0.039444	1.25497
20.6	20.75	0.018889	1.24979
20.7	27.25	0.029444	1.24412
20.8	24	0.024444	1.23795
20.9	5.75	0.010278	1.23131
21	9.25	0.020833	1.22418
21.1	39	0.046111	1.21657
21.2	98.5	0.063333	1.20859
21.3	161.75	0.085833	1.20044
21.4	133.75	0.059722	1.19234
21.5	107.25	0.066944	1.18432
21.6	109.25	0.059444	1.17628
21.7	117	0.063889	1.1682
21.8	75.25	0.036944	1.16011
21.9	94.75	0.065278	1.15193
22	156.25	0.078889	1.14366
22.1	162.25	0.080833	1.1355
22.2	112	0.056667	1.12752
22.3	74.75	0.046389	1.11961
22.4	94.25	0.054167	1.11163
22.5	30.25	0.038333	1.10359
22.6	71.25	0.039167	1.09537
22.7	32	0.042778	1.08701
22.8	35	0.048889	1.07848
22.9	102.5	0.051944	1.06976
23	67.25	0.045	1.06103
23.1	55	0.033611	1.05228
23.2	88.75	0.051667	1.04347
23.3	153.75	0.083611	1.03467
23.4	179.5	0.076389	1.02608
23.5	185	0.080278	1.01784
23.6	174.75	0.081944	1.00999
23.7	53.5	0.044167	1.00248
23.8	64.75	0.038889	0.995023
23.9	71.5	0.056111	0.987499
24	71.75	0.058611	0.979949
24.1	138.5	0.065833	0.972391
24.2	145	0.076111	0.96499
24.3	109.75	0.060278	0.957838
24.4	67.5	0.033056	0.950856
24.5	61.75	0.033889	0.9439
24.6	42.75	0.035833	0.936914
24.7	10.5	0.020556	0.929853
24.8	10.5	0.014444	0.922631
24.9	6	0.013056	0.915226
25	17.25	0.029167	0.907645
25.1	21.25	0.033611	0.899926
25.2	40.25	0.038333	0.89211
25.3	56	0.048889	0.88426
25.4	21.5	0.037222	0.87645
25.5	33.5	0.043611	0.868625
25.6	5.25	0.011389	0.860786
25.7	54.75	0.041944	0.852893
25.8	86	0.046944	0.845045
25.9	74.5	0.038889	0.837384
26	69	0.038333	0.829923
26.1	103.25	0.063333	0.822638
26.2	92.75	0.046111	0.815608
26.3	59.5	0.051667	0.808848
26.4	9.5	0.029722	0.802266
26.5	20.75	0.020833	0.795708
26.6	52.75	0.040556	0.789152
26.7	6.75	0.023056	0.782699
26.8	21.25	0.021944	0.776286
26.9	1.75	0.008611	0.769902
27	20	0.0425	0.763531
27.1	65.25	0.051389	0.757205
27.2	8	0.010556	0.751064
27.3	14.25	0.015	0.745028
27.4	10	0.015556	0.739055
27.5	7	0.013889	0.733152
27.6	5.75	0.016389	0.727318
27.7	3	0.015556	0.721557
27.8	40	0.036667	0.715871
27.9	49.5	0.046667	0.710355
28	67	0.073056	0.705082
28.1	117.5	0.093056	0.700105
28.2	66.75	0.058889	0.695565
28.3	116.25	0.066944	0.691392
28.4	58.75	0.035833	0.68764
28.5	38.25	0.035556	0.68422
28.6	23	0.027778	0.681014
28.7	3	0.014167	0.677961
28.8	9.25	0.016667	0.675001
28.9	6.75	0.017222	0.672131
29	7.25	0.018333	0.66936
29.1	10.5	0.02	0.666691
29.2	5	0.015556	0.664141
29.3	12.25	0.035556	0.661704
29.4	64.25	0.065278	0.659399
29.5	116	0.073611	0.657362
29.6	121.5	0.070833	0.655773
29.7	69	0.045	0.654695
29.8	45	0.028889	0.653996
29.9	13.5	0.020278	0.653548
30	9.25	0.016111	0.653245
30.1	2.75	0.008056	0.653042
30.2	11	0.019722	0.652921
30.3	31	0.031111	0.6529
30.4	18	0.023889	0.653039
30.5	64	0.038333	0.653331
30.6	85	0.064722	0.65387
30.7	87.25	0.0675	0.654757
30.8	59.5	0.055833	0.656011
30.9	116.25	0.065	0.657559
31	106	0.063333	0.659496
31.1	151.75	0.0725	0.661848
31.2	114.25	0.065833	0.664699
31.3	92.25	0.056667	0.667992
31.4	50	0.052778	0.671613
31.5	35.5	0.043611	0.675422
31.6	31.75	0.033889	0.67933
31.7	13.5	0.041111	0.683307
31.8	13.25	0.018889	0.687304
31.9	27.25	0.028333	0.6913
32	46.5	0.033056	0.695329
32.1	78.5	0.058056	0.699455
32.2	130.25	0.069444	0.703772
32.3	90.5	0.056944	0.708433
32.4	80.25	0.043611	0.713389
32.5	7.75	0.014167	0.718555
32.6	6.75	0.02	0.723738
32.7	15	0.02	0.72885
32.8	9.5	0.033889	0.733915
32.9	24.25	0.038333	0.73893
33	21.5	0.040833	0.743927
33.1	45.25	0.054167	0.748919
33.2	26.5	0.026944	0.753961
33.3	24.25	0.029167	0.759033
33.4	49.75	0.05	0.764109
33.5	77.75	0.044167	0.769247
33.6	138.5	0.081111	0.774541
33.7	108.5	0.070556	0.780161
33.8	37	0.036667	0.78609
33.9	20.75	0.020278	0.792108
34	54.5	0.039167	0.79809
34.1	49	0.033611	0.804096
34.2	19.5	0.023056	0.810149
34.3	35.5	0.025833	0.816171
34.4	13.75	0.020556	0.822164
34.5	47.5	0.053611	0.828097
34.6	37.75	0.033889	0.834025
34.7	42.25	0.045556	0.839963
34.8	34.5	0.057778	0.845908
34.9	50.75	0.042222	0.851847
35	68.5	0.038056	0.857806
35.1	51.75	0.040556	0.863845
35.2	60.5	0.039722	0.869938
35.3	86	0.052778	0.876083
35.4	70.75	0.058889	0.882343
35.5	69.5	0.059444	0.888706
35.6	41.25	0.048611	0.89514
35.7	19.75	0.035278	0.901572
35.8	51	0.043889	0.907914
35.9	45	0.031389	0.914215
36	64.75	0.060833	0.920495
36.1	67.25	0.0575	0.92679
36.2	84	0.052222	0.933125
36.3	36	0.055	0.939536
36.4	145.75	0.088333	0.945919
36.5	181.25	0.098056	0.952475
36.6	126.5	0.06	0.959402
36.7	116	0.092222	0.966586
36.8	117	0.076944	0.973918
36.9	92	0.062222	0.981373
37	74	0.060278	0.988879
37.1	94.5	0.063333	0.99635
37.2	89.25	0.070278	1.00381
37.3	120.25	0.074167	1.01125
37.4	106.25	0.061944	1.01874
37.5	131.75	0.078333	1.02626
37.6	129	0.074167	1.03385
37.7	145.5	0.084167	1.04151
37.8	150.75	0.072778	1.04927
37.9	149.5	0.0725	1.05713
38	172	0.078333	1.06509
38.1	75.5	0.063889	1.07317
38.2	85.25	0.058333	1.08115
38.3	170.5	0.081389	1.08894
38.4	108.25	0.066111	1.09674
38.5	127	0.080556	1.10448
38.6	126.25	0.074722	1.11213
38.7	175	0.077222	1.1197
38.8	207.75	0.096944	1.12729
38.9	170.5	0.073611	1.13501
39	169.5	0.073611	1.14279
39.1	160.25	0.080278	1.15057
39.2	183.25	0.083056	1.1583
39.3	181.5	0.0925	1.16602
39.4	193.25	0.092222	1.17373
39.5	158.5	0.076667	1.18143
39.6	149.75	0.083333	1.18904
39.7	101.5	0.076111	1.19648
39.8	143.25	0.084167	1.20362
39.9	203.25	0.092222	1.2105
40	195.5	0.093056	1.2173
40.1	210.75	0.085278	1.22405
40.2	170.25	0.078611	1.23077
40.3	218.75	0.093056	1.23736
40.4	164.25	0.085278	1.24388
40.5	125	0.070278	1.25023
40.6	106	0.054444	1.25625
40.7	137.25	0.085556	1.26185
40.8	75.25	0.050833	1.26708
40.9	101.25	0.055556	1.27183
41	79.5	0.055833	1.27609
41.1	90.25	0.065	1.27985
41.2	107.5	0.060833	1.28312
41.3	100	0.075	1.28596
41.4	175	0.083611	1.28838
41.5	191.5	0.081389	1.29057
41.6	144.25	0.081667	1.29263
41.7	153	0.083056	1.29448
41.8	182.25	0.083611	1.29608
41.9	108.5	0.07	1.2975
42	187.5	0.086111	1.29862
42.1	149.25	0.077222	1.29952
42.2	107.5	0.064167	1.30021
42.3	134	0.086944	1.30055
42.4	175.75	0.083889	1.30055
42.5	131	0.072778	1.30036
42.6	171	0.072778	1.29992
42.7	159.75	0.078611	1.29927
42.8	100	0.047778	1.29843
42.9	91.5	0.042778	1.29726
43	71	0.038333	1.29566
43.1	123.25	0.069722	1.2936
43.2	55.5	0.049722	1.29119
43.3	137.5	0.091389	1.28835
43.4	177.5	0.081389	1.28519
43.5	78.75	0.053056	1.28194
43.6	89.25	0.043333	1.27839
43.7	53.5	0.042778	1.27447
43.8	42	0.041944	1.27013
43.9	63.25	0.041111	1.26531
44	21	0.022222	1.26008
44.1	56.5	0.031111	1.25437
44.2	89.25	0.057778	1.24825
44.3	157.5	0.069444	1.24186
44.4	113.75	0.057778	1.23541
44.5	118.5	0.060833	1.22889
44.6	99.5	0.0625	1.22226
44.7	106	0.056944	1.2155
44.8	140	0.099167	1.20861
44.9	92.75	0.059167	1.20168
45	135.25	0.0625	1.19464
45.1	63.75	0.046111	1.18757
45.2	70.75	0.043333	1.18033
45.3	33	0.025278	1.17288
45.4	54.25	0.034167	1.16515
45.5	40	0.045556	1.15716
45.6	102.75	0.068611	1.14893
45.7	141.25	0.068889	1.14061
45.8	55.25	0.047222	1.13237
45.9	74.75	0.034444	1.12406
46	66.75	0.052778	1.11563
46.1	114	0.055556	1.10709
46.2	124.25	0.086667	1.09858
46.3	132.5	0.056667	1.09017
46.4	82	0.0375	1.0819
46.5	101	0.044722	1.07365
46.6	92.5	0.038889	1.06543
46.7	99.25	0.055833	1.05723
46.8	125.75	0.069722	1.04907
46.9	95.25	0.065556	1.04104
47	83.75	0.045833	1.03308
47.1	88.25	0.058333	1.02514
47.2	79.25	0.059722	1.01722
47.3	68.25	0.046389	1.00931
47.4	123.75	0.073889	1.00139
47.5	159	0.077778	0.99358
47.6	80.75	0.054444	0.986028
47.7	29	0.030556	0.978587
47.8	95.25	0.08	0.971046
47.9	155.75	0.076944	0.963512
48	222.34	0.1	0.956213
48.1	222.34	0.1	0.949374
48.2	222.34	0.1	0.943056
48.3	222.34	0.1	0.937239
48.4	222.34	0.1	0.931904
48.5	222.34	0.1	0.927031
48.6	222.34	0.1	0.9226
48.7	222.34	0.1	0.918591
48.8	222.34	0.1	0.914983
48.9	222.34	0.1	0.911759
49	222.34	0.1	0.908897
49.1	222.34	0.1	0.906378
49.2	222.34	0.1	0.904185
49.3	222.34	0.1	0.902297
49.4	222.34	0.1	0.900697
49.5	222.34	0.1	0.899366
49.6	222.34	0.1	0.898288
49.7	222.34	0.1	0.897445
49.8	222.34	0.1	0.89682
49.9	222.34	0.1	0.896399
50	222.34	0.1	0.896165
50.1	222.34	0.1	0.896103
50.2	222.34	0.1	0.8962
50.3	222.34	0.1	0.896442
50.4	222.34	0.1	0.896816
50.5	222.34	0.1	0.897308
50.6	222.34	0.1	0.897909
50.7	222.34	0.1	0.898606
50.8	222.34	0.1	0.899388
50.9	222.34	0.1	0.900247
51	222.34	0.1	0.901173
51.1	222.34	0.1	0.902158
51.2	222.34	0.1	0.903192
51.3	222.34	0.1	0.90427
51.4	222.34	0.1	0.905385
51.5	222.34	0.1	0.90653
51.6	222.34	0.1	0.9077
51.7	222.34	0.1	0.90889
51.8	222.34	0.1	0.910095
51.9	222.34	0.1	0.911313
52	222.34	0.1	0.912539
52.1	222.34	0.1	0.913772
52.2	222.34	0.1	0.915008
52.3	222.34	0.1	0.916246
52.4	222.34	0.1	0.917485
52.5	222.34	0.1	0.918724
52.6	222.34	0.1	0.919962
52.7	222.34	0.1	0.921201
52.8	222.34	0.1	0.922439
52.9	222.34	0.1	0.923678
53	222.34	0.1	0.924918
53.1	222.34	0.1	0.926162
53.2	222.34	0.1	0.927411
53.3	222.34	0.1	0.928667
53.4	222.34	0.1	0.929932
53.5	222.34	0.1	0.931208
53.6	222.34	0.1	0.932499
53.7	222.34	0.1	0.933807
53.8	222.34	0.1	0.935135
53.9	222.34	0.1	0.936486
54	222.34	0.1	0.937863
54.1	245.5	0.099444	0.939271
54.2	204.25	0.081111	0.940766
54.3	85.5	0.041389	0.94228
54.4	42.75	0.024167	0.943488
54.5	7	0.005278	0.944171
54.6	17.25	0.011667	0.944227
54.7	8.75	0.0075	0.943679
54.8	7.5	0.007222	0.942559
54.9	9	0.008333	0.940896
55	5.25	0.011944	0.938731
55.1	19	0.017778	0.936098
55.2	25.25	0.033889	0.933067
55.3	29	0.023333	0.929706
55.4	10.75	0.016667	0.926068
55.5	48	0.046111	0.92215
55.6	51.75	0.026667	0.918054
55.7	22.5	0.021111	0.913865
55.8	6.5	0.008333	0.909545
55.9	6	0.008333	0.905054
56	5	0.009167	0.900406
56.1	23.5	0.027778	0.89563
56.2	49.5	0.027222	0.890802
56.3	31.75	0.019444	0.886033
56.4	4.75	0.011667	0.881336
56.5	3.5	0.008611	0.876649
56.6	11.75	0.013611	0.871965
56.7	8	0.016111	0.867327
56.8	17.5	0.019722	0.862761
56.9	38.5	0.033889	0.858308
57	30.5	0.035833	0.85405
57.1	35.5	0.034167	0.85001
57.2	29.25	0.026389	0.846205
57.3	53	0.034167	0.84264
57.4	100.5	0.0675	0.839377
57.5	106	0.064444	0.836564
57.6	53.75	0.038889	0.834272
57.7	3.75	0.009167	0.83238
57.8	11.25	0.012778	0.830709
57.9	7.25	0.010556	0.829228
58	12	0.015833	0.827947
58.1	15.25	0.016944	0.826879
58.2	22.5	0.025833	0.826047
58.3	10	0.025556	0.825476
58.4	9.5	0.019444	0.82515
58.5	3.25	0.009722	0.825057
58.6	10.25	0.015278	0.825185
58.7	69.25	0.036944	0.825546
58.8	105.75	0.056667	0.826292
58.9	83.25	0.071944	0.82757
59	44.5	0.0525	0.829356
59.1	19.75	0.027778	0.831517
59.2	44.25	0.036944	0.83394
59.3	26.75	0.035556	0.836649
59.4	2	0.01	0.839623
59.5	5.5	0.012222	0.842776
59.6	16.25	0.025	0.846085
59.7	20.75	0.035556	0.849574
59.8	12.25	0.035	0.853264
59.9	44.25	0.044167	0.857131
60	105.75	0.066667	0.861235
60.1	101.5	0.063611	0.865749
60.2	119.75	0.057778	0.870715
60.3	35.5	0.04	0.876148
60.4	89.25	0.071667	0.881844
60.5	56.5	0.062222	0.887817
60.6	48.5	0.036389	0.894033
60.7	71.75	0.05	0.900417
60.8	107.25	0.061944	0.907002
60.9	59.75	0.049167	0.913879
61	42.75	0.051111	0.920957
61.1	29.5	0.033333	0.928121
61.2	87.25	0.053611	0.935305
61.3	105	0.072778	0.942619
61.4	127.5	0.081944	0.950156
61.5	140.75	0.081389	0.957966
61.6	184	0.0875	0.966081
61.7	172.25	0.081944	0.97459
61.8	70.5	0.051389	0.983482
61.9	53.25	0.044722	0.992467
62	52	0.056667	1.00136
62.1	49	0.0525	1.01014
62.2	42.5	0.029444	1.01876
62.3	63	0.044444	1.02722
62.4	71.75	0.049444	1.03553
62.5	99.5	0.058333	1.04373
62.6	125.75	0.061667	1.05188
62.7	137	0.071667	1.06007
62.8	160	0.089722	1.06832
62.9	172.5	0.074167	1.07669
63	81.75	0.050556	1.08521
63.1	104.5	0.070278	1.09364
63.2	168.25	0.076667	1.10193
63.3	115.75	0.073333	1.11023
63.4	136.75	0.066667	1.11847
63.5	154.25	0.075556	1.12662
63.6	120.25	0.054444	1.13474
63.7	99.5	0.063056	1.14273
63.8	109	0.072222	1.1505
63.9	111.25	0.052778	1.15804
64	108.75	0.056111	1.16534
64.1	184.75	0.0825	1.1724
64.2	134	0.075556	1.17939
64.3	63.75	0.043333	1.18624
64.4	71.5	0.046111	1.19274
64.5	59.25	0.051111	1.19879
64.6	132.75	0.078889	1.2044
64.7	201	0.082222	1.20972
64.8	144.25	0.078333	1.21499
64.9	90	0.054167	1.22014
65	124.75	0.063611	1.22496
65.1	121	0.066667	1.22948
65.2	114	0.063333	1.23371
65.3	77	0.052778	1.23763
65.4	59.75	0.058056	1.24115
65.5	44.5	0.028611	1.24418
65.6	67	0.04	1.24668
65.7	93.75	0.044444	1.24869
65.8	28.5	0.038333	1.25031
65.9	32.25	0.025833	1.25143
66	131	0.06	1.25198
66.1	93.5	0.053889	1.25223
66.2	126.5	0.082222	1.2522
66.3	118.5	0.076944	1.25193
66.4	132.75	0.0625	1.25145
66.5	119.75	0.055833	1.25077
66.6	169.25	0.096944	1.24989
66.7	227.5	0.1	1.24892
66.8	235	0.093333	1.24803
66.9	142	0.083333	1.24731
67	143.25	0.069444	1.24652
67.1	118.5	0.060556	1.24555
67.2	85	0.038333	1.24435
67.3	58.5	0.036389	1.24281
67.4	71.25	0.031667	1.24084
67.5	66.5	0.039722	1.23844
67.6	75.25	0.054444	1.23564
67.7	138.5	0.077778	1.23247
67.8	87.25	0.0475	1.22909
67.9	48.25	0.030833	1.22547
68	51	0.037222	1.22146
68.1	53	0.033889	1.21703
68.2	42.5	0.036944	1.21222
68.3	24.5	0.026944	1.20702
68.4	45.25	0.029167	1.20138
68.5	22.75	0.021667	1.19537
68.6	26.5	0.022778	1.18897
68.7	47	0.035	1.18218
68.8	63.25	0.041667	1.17509
68.9	67.75	0.0325	1.16776
69	70.5	0.04	1.16025
69.1	77.75	0.035833	1.15258
69.2	80	0.051389	1.14479
69.3	133.25	0.063333	1.1369
69.4	142.75	0.062778	1.12905
69.5	122.75	0.055	1.12134
69.6	114.25	0.074722	1.11371
69.7	145.75	0.085278	1.10614
69.8	139.75	0.084444	1.09868
69.9	119.75	0.059444	1.09136
70	134	0.060278	1.08413
70.1	112	0.052778	1.077
70.2	80.75	0.0425	1.06992
70.3	57.75	0.043333	1.06281
70.4	66.5	0.033611	1.05558
70.5	76.25	0.0375	1.04823
70.6	137.25	0.086111	1.0408
70.7	102.75	0.058889	1.03347
70.8	115.5	0.057778	1.02622
70.9	158	0.063611	1.01904
71	155.75	0.073611	1.01205
71.1	179	0.077778	1.0053
71.2	154	0.082778	0.998819
71.3	79.75	0.050278	0.992576
71.4	28	0.0425	0.986357
71.5	79.5	0.052778	0.979956
71.6	90	0.043333	0.973446
71.7	64.75	0.038611	0.966923
71.8	67	0.041667	0.960345
71.9	51	0.036944	0.953695
72	65.5	0.037222	0.946948
72.1	89.75	0.050833	0.94013
72.2	99.5	0.057778	0.933326
72.3	96.5	0.045833	0.926593
72.4	129.25	0.079444	0.91994
72.5	166	0.076944	0.913442
72.6	182.25	0.089167	0.907226
72.7	208.75	0.098611	0.901365
72.8	188.5	0.088611	0.895931
72.9	122.75	0.059444	0.890891
73	119.5	0.060556	0.886051
73.1	122.5	0.059722	0.881322
73.2	132.75	0.062778	0.876706
73.3	142.75	0.073889	0.87223
73.4	121.75	0.074444	0.867926
73.5	61.5	0.035833	0.863753
73.6	30	0.035833	0.85954
73.7	43.25	0.035833	0.85515
73.8	19.75	0.017778	0.850591
73.9	7	0.015278	0.845836
74	37.25	0.022222	0.840844
74.1	39.5	0.030556	0.835691
74.2	46.75	0.028889	0.830433
74.3	92.5	0.0475	0.825105
74.4	85.25	0.046111	0.819836
74.5	86	0.050833	0.814669
74.6	81	0.056389	0.809603
74.7	75	0.051111	0.804633
74.8	66.75	0.044444	0.799744
74.9	69	0.046389	0.794918
75	7	0.019444	0.790156
75.1	13.75	0.018333	0.785323
75.2	8	0.022222	0.780379
75.3	18.25	0.026111	0.775334
75.4	29	0.042222	0.770224
75.5	48.5	0.041944	0.765102
75.6	56.5	0.031667	0.760043
75.7	68.25	0.041111	0.755098
75.8	67	0.048333	0.750314
75.9	58.5	0.035278	0.745707
76	63	0.039722	0.741263
76.1	143	0.0825	0.736988
76.2	125	0.070833	0.733082
76.3	157.25	0.068056	0.729593
76.4	175	0.076667	0.726568
76.5	130.5	0.076389	0.724077
76.6	125	0.071389	0.72202
76.7	70	0.040833	0.720324
76.8	63.5	0.034167	0.718842
76.9	61.5	0.037778	0.717496
77	58.5	0.0325	0.716276
77.1	9	0.013889	0.715174
77.2	6.25	0.014722	0.714076
77.3	20.25	0.02	0.712925
77.4	13.75	0.02	0.711764
77.5	23	0.028056	0.710605
77.6	13.25	0.027222	0.709474
77.7	13.5	0.025833	0.708366
77.8	14.25	0.023056	0.707283
77.9	44	0.033889	0.706236
78	64	0.060833	0.705306
78.1	77.75	0.055556	0.704582
78.2	102.5	0.058333	0.704122
78.3	114	0.057222	0.703998
78.4	121.75	0.071667	0.704261
78.5	54.75	0.056111	0.704934
78.6	14.25	0.023333	0.705858
78.7	9.75	0.030278	0.706855
78.8	14	0.019167	0.707873
78.9	32.25	0.029722	0.708924
79	66	0.044167	0.710065
79.1	74	0.042778	0.711399
79.2	60.75	0.041667	0.712986
79.3	76.25	0.034167	0.714799
79.4	57.5	0.0425	0.716857
79.5	90.75	0.059722	0.71913
79.6	84	0.049167	0.72167
79.7	37.25	0.037778	0.724495
79.8	53.75	0.050833	0.727478
79.9	102	0.071389	0.730602
80	92	0.057778	0.733999
80.1	128.25	0.067778	0.737694
80.2	93.25	0.050556	0.741751
80.3	28.75	0.024722	0.746114
80.4	8.5	0.0175	0.75058
80.5	26.25	0.029444	0.755022
80.6	50.25	0.029444	0.759462
80.7	11.5	0.012222	0.763982
80.8	6.5	0.013056	0.768515
80.9	12.75	0.019722	0.773007
81	10	0.013889	0.777471
81.1	15.5	0.026111	0.781912
81.2	51.25	0.045	0.786344
81.3	62.25	0.044167	0.790862
81.4	41.25	0.038333	0.795531
81.5	20.5	0.028889	0.800309
81.6	45	0.043611	0.805121
81.7	57.5	0.039444	0.81
81.8	83.75	0.060278	0.815002
81.9	54	0.06	0.820201
82	68.5	0.054167	0.825548
82.1	72.75	0.048333	0.831035
82.2	36.25	0.0425	0.836682
82.3	70.25	0.038611	0.842401
82.4	76.75	0.031389	0.848225
82.5	84.25	0.044722	0.854202
82.6	64.75	0.042222	0.860349
82.7	59.75	0.050278	0.866618
82.8	24.75	0.03	0.872966
82.9	64.5	0.038611	0.879296
83	55.75	0.046944	0.885661
83.1	54.75	0.0375	0.89208
83.2	62	0.045556	0.898535
83.3	37.25	0.046389	0.905034
83.4	19	0.036944	0.911523
83.5	41.25	0.035	0.917924
83.6	21	0.020278	0.924269
83.7	15.25	0.020833	0.930533
83.8	12.25	0.019444	0.936679
83.9	6.5	0.019444	0.942694
84	45.75	0.047222	0.948561
84.1	98.25	0.057778	0.954371
84.2	170	0.082222	0.960291
84.3	68.75	0.060278	0.966542
84.4	85.75	0.0425	0.972945
84.5	98	0.061667	0.97941
84.6	93.25	0.063889	0.985975
84.7	69.5	0.051944	0.99263
84.8	65	0.057222	0.999302
84.9	106.25	0.064167	1.00594
85	123.25	0.073333	1.01263
85.1	70.25	0.055556	1.01946
85.2	102.25	0.081389	1.02628
85.3	162.25	0.080833	1.03313
85.4	154.25	0.093611	1.04014
85.5	139.25	0.068889	1.04737
85.6	184.75	0.079722	1.05474
85.7	156.25	0.073889	1.06233
85.8	116.25	0.081111	1.07008
85.9	157.25	0.085	1.07786
86	105.5	0.071667	1.0857
86.1	165.5	0.086944	1.0935
86.2	172	0.084444	1.10133
86.3	121.25	0.082222	1.10926
86.4	116.25	0.076667	1.11715
86.5	109.75	0.060278	1.12491
86.6	124	0.080278	1.13253
86.7	92.5	0.065278	1.14
86.8	95.25	0.059722	1.14726
86.9	125.25	0.081389	1.15427
87	166.75	0.091111	1.1611
87.1	136.75	0.089167	1.16788
87.2	205.75	0.089722	1.17457
87.3	233	0.097778	1.18128
87.4	170.5	0.090833	1.18814
87.5	108.75	0.088889	1.19501
87.6	94.5	0.07	1.20165
87.7	122.5	0.0675	1.20794
87.8	91.25	0.065556	1.21393
87.9	67.75	0.048889	1.21958
88	75.5	0.070556	1.2248
88.1	115.5	0.071944	1.22957
88.2	113.25	0.078333	1.23401
88.3	126.25	0.065833	1.23816
88.4	106.25	0.060278	1.24205
88.5	174	0.081389	1.24564
88.6	243.75	0.096389	1.24906
88.7	248.5	0.1	1.25256
88.8	127.25	0.085278	1.25622
88.9	126	0.06	1.25971
89	147.25	0.08	1.2629
89.1	176	0.071389	1.26584
89.2	92.75	0.056944	1.2686
89.3	119	0.067778	1.27103
89.4	175.25	0.082222	1.27308
89.5	127	0.068056	1.27493
89.6	88.75	0.048333	1.27653
89.7	120.25	0.064444	1.27773
89.8	79.5	0.0425	1.27856
89.9	99.5	0.0625	1.27896
90	111.25	0.058333	1.27896
90.1	109.25	0.056944	1.27861
90.2	161.25	0.065833	1.27793
90.3	196.75	0.082778	1.27704
90.4	153.5	0.076389	1.27609
90.5	184.25	0.075556	1.27501
90.6	161.5	0.075833	1.27383
90.7	176.5	0.079167	1.27252
90.8	138.5	0.056944	1.2711
90.9	102.75	0.061389	1.26947
91	88	0.041944	1.26753
91.1	116.5	0.058333	1.26519
91.2	79	0.041944	1.26253
91.3	107	0.062778	1.25949
91.4	167.25	0.090556	1.25611
91.5	205.25	0.0775	1.25259
91.6	220.25	0.0875	1.24907
91.7	191.75	0.080278	1.24564
91.8	142.25	0.06	1.24224
91.9	145.75	0.078889	1.23871
92	120	0.060556	1.235
92.1	160.75	0.075278	1.23107
92.2	114.5	0.055278	1.22698
92.3	93	0.055556	1.22268
92.4	128.25	0.072222	1.21807
92.5	172.75	0.076111	1.21322
92.6	74.5	0.037778	1.20829
92.7	79.75	0.041389	1.20309
92.8	102	0.065278	1.19755
92.9	151.25	0.062222	1.19172
93	100.25	0.055278	1.18578
93.1	135.5	0.080278	1.17966
93.2	139.25	0.064167	1.1734
93.3	84	0.043889	1.16705
93.4	59.75	0.027778	1.1605
93.5	21	0.018333	1.15364
93.6	19.25	0.020278	1.14636
93.7	49	0.036944	1.13864
93.8	56.5	0.048611	1.13057
93.9	85	0.044722	1.12224
94	77	0.050278	1.11373
94.1	74.75	0.063333	1.10509
94.2	120.5	0.074722	1.0963
94.3	124.75	0.058889	1.08749
94.4	103	0.0625	1.07873
94.5	151.5	0.075	1.06999
94.6	97	0.071111	1.06136
94.7	58.5	0.031111	1.05277
94.8	118.75	0.062222	1.04408
94.9	85.75	0.041944	1.0354
95	69.75	0.038333	1.02673
95.1	80	0.043889	1.018
95.2	73.25	0.052222	1.00924
95.3	77.75	0.058333	1.00044
95.4	77.75	0.040833	0.991633
95.5	67.75	0.034167	0.982827
95.6	86	0.056944	0.974011
95.7	120.5	0.071667	0.96523
95.8	187.75	0.096111	0.956595
95.9	170	0.090556	0.948311
96	186.5	0.097222	0.940409
