# Supplementary material for: The sleep-wake distribution contributes to the peripheral rhythms in PERIOD-2
Source: eLife. 2021 Dec 13;10:e69773. doi: 10.7554/eLife.69773 (PMC8798053; doi:10.7554/eLife.69773)
Supplement: Figure 4—source data 1. [file elife-69773-fig4-data1.xlsx]

## Sheet: B
Time [hrs]	Activity	Model 1 (Fwake)	Model 2 (Fperi)	Model 3 (Fwake + Fperi))		Time[hrs]	Bioluminescence
12.1	60	0.896489	1.12899	0.923861		12.5	0.784421
12.2	14.25	0.896514	1.12937	0.923896		13	0.689062
12.3	15	0.896563	1.12966	0.92398		13.5	1.11108
12.4	16.25	0.896624	1.12985	0.924103		14	1.13445
12.5	5.25	0.896697	1.12994	0.924265		14.5	0.843849
12.6	36	0.896778	1.12994	0.924461		15	1.30733
12.7	34	0.896879	1.12984	0.924702		15.5	0.903049
12.8	98.5	0.897009	1.12965	0.924994		16	1.24493
12.9	98.25	0.897201	1.12935	0.925365		16.5	1.15444
13	147.25	0.897472	1.12896	0.92583		17	1.49249
13.1	193.25	0.897851	1.12848	0.926408		17.5	1.20296
13.2	131	0.898373	1.1279	0.927133		18	1.09247
13.3	104.5	0.899018	1.12723	0.927983		18.5	1.28631
13.4	115	0.899752	1.12646	0.928934		19	1.41464
13.5	85.5	0.900573	1.12559	0.92998		19.5	1.05973
13.6	26.75	0.901468	1.12464	0.931112		20	1.0304
13.7	4	0.902394	1.12359	0.932293		20.5	1.2425
13.8	18.75	0.903323	1.12244	0.933498		21	1.19322
13.9	20.25	0.904255	1.12121	0.934728		21.5	1.23764
14	58	0.905196	1.11989	0.935986		22	1.0441
14.1	66	0.906165	1.11847	0.937287		22.5	0.885133
14.2	75.5	0.907177	1.11697	0.938641		23	1.00894
14.3	118	0.908238	1.11538	0.940054		23.5	1.10429
14.4	90.75	0.909374	1.11371	0.941546		24	1.03729
14.5	54	0.910579	1.11195	0.94311		24.5	0.979805
14.6	51.5	0.911826	1.11011	0.944723		25	0.799018
14.7	71.75	0.913102	1.10818	0.946374		25.5	0.863608
14.8	30.75	0.914417	1.10617	0.948068		26	0.903517
14.9	34.5	0.915752	1.10408	0.949791		26.5	0.701927
15	15.25	0.917098	1.10192	0.951531		27	0.835411
15.1	24.5	0.918444	1.09968	0.953281		27.5	1.17578
15.2	34.75	0.919789	1.09736	0.955036		28	0.915622
15.3	98.5	0.92114	1.09497	0.956802		28.5	0.899567
15.4	97.25	0.922535	1.0925	0.958608		29	1.17095
15.5	98.75	0.923989	1.08997	0.960466		29.5	0.838544
15.6	66.25	0.925501	1.08737	0.962374		30	0.684717
15.7	87.5	0.927053	1.0847	0.964315		30.5	0.782602
15.8	81	0.928647	1.08196	0.966289		31	0.762543
15.9	54.25	0.930283	1.07917	0.968295		31.5	0.656253
16	48	0.931945	1.07631	0.970318		32	0.731665
16.1	27	0.933619	1.07339	0.972346		32.5	0.989069
16.2	32	0.935292	1.07042	0.974367		33	1.04503
16.3	37.75	0.93696	1.06739	0.976374		33.5	0.810598
16.4	102.75	0.938625	1.06431	0.97837		34	1.02205
16.5	45.25	0.940326	1.06118	0.980383		34.5	1.08986
16.6	30.5	0.942045	1.05801	0.982399		35	0.956529
16.7	73.25	0.94376	1.05478	0.984396		35.5	0.961682
16.8	52.75	0.945486	1.05151	0.986388		36	1.18039
16.9	70.75	0.947226	1.0482	0.988372		36.5	1.20288
17	42.5	0.94898	1.04485	0.99035		37	1.25367
17.1	43	0.950738	1.04147	0.992311		37.5	1.05807
17.2	42.5	0.952491	1.03805	0.994246		38	0.781824
17.3	64.75	0.954237	1.0346	0.996153		38.5	0.87613
17.4	29.75	0.955988	1.03112	0.998039		39	0.76603
17.5	69	0.95773	1.02761	0.999891		39.5	1.01879
17.6	177.25	0.959473	1.02408	1.00172		40	1.17793
17.7	164.5	0.961287	1.02052	1.00357		40.5	1.3008
17.8	130.5	0.963193	1.01695	1.00547		41	1.2974
17.9	137.25	0.965166	1.01335	1.0074		41.5	1.29159
18	83.5	0.967201	1.00975	1.00935		42	1.02728
18.1	88.5	0.969268	1.00613	1.01129		42.5	1.19795
18.2	115.5	0.971353	1.0025	1.0132		43	1.14838
18.3	125.5	0.973472	0.998867	1.01511		43.5	1.12587
18.4	148.25	0.975635	0.995228	1.01702		44	1.1553
18.5	67.25	0.977857	0.991587	1.01895		44.5	1.28789
18.6	78.5	0.980097	0.987947	1.02084		45	1.44615
18.7	23.75	0.982339	0.98431	1.0227		45.5	0.919329
18.8	54.25	0.984553	0.980679	1.02449		46	1.0376
18.9	74.75	0.98674	0.977056	1.02622		46.5	1.39534
19	91.25	0.988919	0.973445	1.0279		47	1.19772
19.1	44.25	0.991102	0.969846	1.02954		47.5	0.967924
19.2	39.75	0.993268	0.966264	1.03112		48	0.858103
19.3	52.25	0.995399	0.9627	1.03263		48.5	0.839784
19.4	94.75	0.9975	0.959157	1.03406		49	0.855373
19.5	77	0.999596	0.955638	1.03544		49.5	0.821788
19.6	43	1.00169	0.952145	1.03677		50	0.905277
19.7	30.75	1.00375	0.94868	1.03803		50.5	0.948084
19.8	11.25	1.00577	0.945246	1.0392		51	0.992027
19.9	35.5	1.00773	0.941845	1.04027		51.5	1.07724
20	60.25	1.00963	0.93848	1.04124		52	0.982662
20.1	102	1.0115	0.935153	1.04214		52.5	1.03298
20.2	140.5	1.01336	0.931867	1.04297		53	0.958021
20.3	112.5	1.01524	0.928623	1.04378		53.5	0.922405
20.4	65.75	1.01715	0.925424	1.04455		54	0.658696
20.5	93	1.01904	0.922272	1.04525		54.5	0.767081
20.6	79.5	1.02091	0.91917	1.0459		55	0.777984
20.7	63.75	1.02277	0.916119	1.04647		55.5	1.20264
20.8	16.25	1.0246	0.913122	1.04697		56	1.13142
20.9	88.75	1.02637	0.910181	1.04737		56.5	0.804684
21	156.25	1.02811	0.907298	1.04768		57	0.72201
21.1	125.5	1.02987	0.904475	1.04796		57.5	0.74412
21.2	71.5	1.03164	0.901714	1.04821		58	0.988046
21.3	29.5	1.0334	0.899017	1.04839		58.5	0.823315
21.4	42.25	1.03511	0.896385	1.04848		59	0.835164
21.5	58.25	1.03675	0.893821	1.04846		59.5	0.873419
21.6	83.25	1.03834	0.891327	1.04835		60	0.848991
21.7	66.5	1.0399	0.888904	1.04816		60.5	1.00274
21.8	99	1.04143	0.886553	1.04789		61	1.06098
21.9	118	1.04293	0.884277	1.04756		61.5	1.36392
22	60.75	1.04442	0.882078	1.04717		62	1.1475
22.1	72.5	1.04588	0.879956	1.04671		62.5	1.58434
22.2	43.5	1.0473	0.877913	1.04617		63	1.25103
22.3	60.75	1.04866	0.875951	1.04554		63.5	1.06207
22.4	51.25	1.04997	0.87407	1.04482		64	1.01122
22.5	52.75	1.05122	0.872273	1.044		64.5	1.03316
22.6	79.75	1.05242	0.870561	1.0431		65	1.14459
22.7	74.75	1.05357	0.868935	1.04212		65.5	1.04306
22.8	60.25	1.05468	0.867395	1.04106		66	1.26413
22.9	74.5	1.05574	0.865943	1.03993		66.5	1.64881
23	51.5	1.05675	0.864581	1.03872		67	1.22904
23.1	68.25	1.05771	0.863308	1.03743		67.5	0.980652
23.2	49.75	1.05861	0.862126	1.03606		68	0.935957
23.3	48.25	1.05946	0.861036	1.03461		68.5	0.964487
23.4	50.5	1.06024	0.860039	1.03307		69	0.877638
23.5	77	1.06096	0.859134	1.03145		69.5	1.07219
23.6	72	1.06162	0.858324	1.02976		70	1.10877
23.7	91.25	1.06225	0.857607	1.028		70.5	1.15972
23.8	112.5	1.06283	0.856986	1.0262		71	0.860132
23.9	37.5	1.0634	0.85646	1.02435		71.5	0.91235
24	46	1.06391	0.85603	1.02243		72	0.872074
24.1	63	1.06434	0.855695	1.02043		76	0.661357
24.2	8.25	1.06472	0.855457	1.01837		76.5	0.962873
24.3	14.25	1.06502	0.855315	1.01622		77	0.743268
24.4	42.25	1.06522	0.85527	1.01398		77.5	0.669716
24.5	52	1.06533	0.855322	1.01166		78	0.681436
24.6	46	1.06538	0.855469	1.00928		78.5	0.741846
24.7	100.5	1.06537	0.855713	1.00683		79	0.862063
24.8	107.5	1.06532	0.856054	1.00435		79.5	0.926445
24.9	118.75	1.06524	0.85649	1.00185		80	1.04763
25	166	1.06516	0.857022	0.999334		80.5	1.11822
25.1	189	1.06509	0.85765	0.996838		81	1.30895
25.2	85.75	1.06507	0.858372	0.99438		81.5	1.40138
25.3	124.5	1.06505	0.859188	0.991923		82	1.30461
25.4	83.75	1.065	0.860099	0.989463		82.5	1.10336
25.5	80.25	1.06494	0.861102	0.986992		83	1.04792
25.6	73	1.06483	0.862198	0.984503		83.5	1.30025
25.7	77.75	1.06468	0.863385	0.981993		84	1.31304
25.8	32.25	1.06449	0.864664	0.979465		84.5	1.18095
25.9	120	1.06423	0.866032	0.976903		85	1.35891
26	91.5	1.06395	0.867489	0.974338		85.5	1.35559
26.1	95	1.06364	0.869034	0.97178		86	0.988152
26.2	68.25	1.06331	0.870666	0.969227		86.5	0.923355
26.3	15	1.06293	0.872384	0.966671		87	1.20617
26.4	23.5	1.06248	0.874186	0.964082		87.5	0.907768
26.5	18.25	1.06195	0.876072	0.961457		88	0.779625
26.6	20.25	1.06133	0.878039	0.958796		88.5	0.808025
26.7	12.75	1.06062	0.880087	0.956104		89	0.787343
26.8	63.5	1.05983	0.882214	0.953379		89.5	0.86442
26.9	30.25	1.05897	0.884418	0.950646		90	0.739612
27	56.25	1.05805	0.886699	0.947904		90.5	0.77709
27.1	124.5	1.05707	0.889054	0.94516		91	0.800232
27.2	141.75	1.05608	0.891482	0.942454		91.5	0.791624
27.3	169.25	1.0551	0.893981	0.939813		92	0.705672
27.4	110.5	1.05416	0.896549	0.937254		92.5	0.830864
27.5	69	1.05323	0.899185	0.934761		93	0.826156
27.6	148	1.05228	0.901886	0.932304		93.5	0.81398
27.7	127	1.05133	0.904651	0.929912		94	0.740497
27.8	125	1.05039	0.907478	0.927595		94.5	0.738511
27.9	89.75	1.04947	0.910365	0.925351		95	0.734626
28	96.5	1.04854	0.913309	0.923166		95.5	0.720485
28.1	40.5	1.04759	0.91631	0.921038		96	0.70462
28.2	69	1.0466	0.919364	0.918944		100	1.02619
28.3	98.75	1.04557	0.922469	0.916887		100.5	0.975872
28.4	159.75	1.04452	0.925624	0.91489		101	0.935438
28.5	91.5	1.0435	0.928826	0.912989		101.5	0.762016
28.6	114.25	1.04248	0.932072	0.91117		102	0.810474
28.7	41.25	1.04147	0.935361	0.909429		102.5	0.772039
28.8	61.75	1.04042	0.938691	0.907741		103	0.884655
28.9	36.5	1.03932	0.942058	0.9061		103.5	1.00928
29	12	1.03818	0.945461	0.904502		104	1.13082
29.1	17	1.03698	0.948897	0.902932		104.5	1.37088
29.2	36.75	1.0357	0.952364	0.901388		105	1.33494
29.3	13.25	1.03436	0.955859	0.899882		105.5	1.41645
29.4	16.5	1.03296	0.95938	0.898412		106	1.44856
29.5	17.25	1.03149	0.962924	0.896973		106.5	1.60517
29.6	5.75	1.02995	0.966489	0.89557		107	1.55276
29.7	16.5	1.02835	0.970072	0.8942		107.5	1.26312
29.8	50	1.02667	0.973671	0.892866		108	1.29394
29.9	116.75	1.02496	0.977284	0.891587		108.5	1.20579
30	79.5	1.02324	0.980907	0.890405		109	1.26824
30.1	113.75	1.02153	0.984539	0.889317		109.5	1.29924
30.2	170.75	1.01984	0.988176	0.888334		110	1.22837
30.3	167.5	1.01819	0.991817	0.887489		110.5	0.894838
30.4	116.25	1.01662	0.995457	0.886797		111	1.06455
30.5	75.5	1.01508	0.999096	0.886233		111.5	0.837882
30.6	92.25	1.01355	1.00273	0.885769		112	0.91548
30.7	100.5	1.01202	1.00636	0.885404		112.5	0.86889
30.8	91	1.01051	1.00998	0.885146		113	0.694774
30.9	40.5	1.009	1.01358	0.884994		113.5	0.709788
31	13.5	1.00748	1.01717	0.884924		114	0.661542
31.1	53.5	1.00592	1.02074	0.884912		114.5	0.620299
31.2	61	1.00432	1.0243	0.884971		115	0.676572
31.3	26	1.00271	1.02783	0.885115		115.5	0.739206
31.4	17	1.00107	1.03134	0.885328		116	0.688198
31.5	37.75	0.999385	1.03482	0.885601		116.5	0.729616
31.6	99.25	0.997668	1.03827	0.88594		117	0.718658
31.7	125	0.995959	1.04168	0.886378		117.5	0.669865
31.8	86	0.99429	1.04507	0.886942		118	0.670068
31.9	140.25	0.992646	1.04841	0.887619		118.5	0.727752
32	142.5	0.991049	1.05172	0.888425		119	0.728134
32.1	80.5	0.989515	1.05499	0.889373		119.5	0.703547
32.2	105.25	0.988012	1.05821	0.890434		120	0.761236
32.3	69.75	0.986536	1.06138	0.891607		124	0.90575
32.4	78.5	0.985077	1.06451	0.892879		124.5	0.947572
32.5	43	0.983629	1.06759	0.894247		125	0.85166
32.6	92.5	0.982177	1.07061	0.895694		125.5	0.837013
32.7	29.75	0.980739	1.07358	0.897235		126	0.932419
32.8	12.5	0.979295	1.07649	0.898852		126.5	1.06318
32.9	22.5	0.97782	1.07935	0.900522		127	1.1507
33	54.25	0.976314	1.08214	0.902243		127.5	1.3249
33.1	55.25	0.9748	1.08487	0.904033		128	1.4238
33.2	48.25	0.973287	1.08753	0.905897		128.5	1.41903
33.3	38.25	0.971773	1.09013	0.907832		129	1.418
33.4	72.5	0.970252	1.09266	0.909829		129.5	1.43029
33.5	68	0.96874	1.09512	0.911901		130	1.4189
33.6	95.25	0.967245	1.09751	0.914053		130.5	1.27017
33.7	82	0.965782	1.09982	0.916293		131	1.27906
33.8	52.5	0.964353	1.10206	0.918621		131.5	1.32545
33.9	125.5	0.962937	1.10422	0.921018		132	1.13436
34	113	0.961568	1.1063	0.923509		132.5	1.1958
34.1	111.25	0.960259	1.1083	0.926103		133	1.01846
34.2	63.75	0.959008	1.11022	0.928795		133.5	0.936172
34.3	81.25	0.957787	1.11206	0.931559		134	1.04595
34.4	124	0.956594	1.11382	0.934393		134.5	0.874955
34.5	94	0.955459	1.11549	0.937315		135	0.965757
34.6	106	0.954376	1.11707	0.940321		135.5	0.806105
34.7	78.25	0.953344	1.11857	0.943406		136	0.891733
34.8	68.25	0.952353	1.11997	0.946558		136.5	0.768506
34.9	57	0.951389	1.12129	0.949764		137	0.697349
35	69	0.950445	1.12252	0.953013		137.5	0.795798
35.1	141.75	0.949523	1.12365	0.956307		138	0.745478
35.2	177.25	0.948668	1.1247	0.959677		138.5	0.761758
35.3	129.75	0.94792	1.12565	0.963154		139	0.712609
35.4	68.5	0.947263	1.12651	0.966721		139.5	0.631541
35.5	73.5	0.946649	1.12727	0.970337		140	0.644066
35.6	32.5	0.946065	1.12794	0.973986		140.5	0.652428
35.7	46	0.94549	1.12851	0.977649		141	0.596404
35.8	106.5	0.94492	1.12899	0.981318		141.5	0.623054
35.9	61.5	0.944394	1.12937	0.985023		142	0.639906
36	48.25	0.943902	1.12966	0.988751		142.5	0.686806
36.1	48.25	0.943425	1.12985	0.992485		143	0.647534
36.2	59.75	0.942961	1.12994	0.996218		143.5	0.656832
36.3	62.25	0.942515	1.12994	0.999952		144	0.670799
36.4	36.25	0.942093	1.12984	1.00369		148	0.81319
36.5	91.25	0.94168	1.12965	1.00741		148.5	0.874243
36.6	76.5	0.941301	1.12935	1.01113		149	0.771115
36.7	126.5	0.940961	1.12896	1.01486		149.5	0.804931
36.8	109	0.940686	1.12848	1.01861		150	1.04991
36.9	113.25	0.940479	1.1279	1.02239		150.5	1.21168
37	128.5	0.940337	1.12723	1.02617		151	1.22558
37.1	154.75	0.940269	1.12646	1.02998		151.5	1.33701
37.2	79.5	0.940295	1.12559	1.03382		152	1.46222
37.3	75.5	0.94038	1.12464	1.03766		152.5	1.36121
37.4	85.25	0.940499	1.12359	1.04148		153	1.4599
37.5	42.5	0.940659	1.12244	1.04527		153.5	1.35914
37.6	33	0.940836	1.12121	1.04903		154	1.35755
37.7	91.75	0.941015	1.11989	1.05272		154.5	1.12784
37.8	121.75	0.941225	1.11847	1.05637		155	1.28211
37.9	104.5	0.941499	1.11697	1.06001		155.5	1.21319
38	167.25	0.941834	1.11538	1.06363		156	1.11358
38.1	125	0.942259	1.11371	1.06725		156.5	1.26047
38.2	77	0.94277	1.11195	1.07086		157	0.959843
38.3	53	0.943326	1.11011	1.07443		157.5	0.945955
38.4	36.5	0.9439	1.10818	1.07793		158	1.04455
38.5	12.5	0.944478	1.10617	1.08134		158.5	0.899994
38.6	20.25	0.94504	1.10408	1.08466		159	0.862196
38.7	10.5	0.945585	1.10192	1.08787		159.5	0.912671
38.8	30.75	0.946108	1.09968	1.09097		160	0.784996
38.9	99	0.946617	1.09736	1.09395		160.5	0.722523
39	93.25	0.947156	1.09497	1.09687		161	0.702921
39.1	82.5	0.94774	1.0925	1.09971		161.5	0.717817
39.2	92.5	0.948361	1.08997	1.10249		162	0.726958
39.3	61.5	0.94902	1.08737	1.10518		162.5	0.664377
39.4	83.75	0.949703	1.0847	1.10779		163	0.676437
39.5	135	0.950414	1.08196	1.11031		163.5	0.719528
39.6	110.25	0.951185	1.07917	1.11276		164	0.670918
39.7	99.25	0.952016	1.07631	1.11514		164.5	0.671076
39.8	104	0.952895	1.07339	1.11745		165	0.683434
39.9	113.5	0.953819	1.07042	1.11967		165.5	0.692479
40	124.25	0.954795	1.06739	1.12182		166	0.742402
40.1	119.25	0.95583	1.06431	1.12389		166.5	0.711453
40.2	49	0.956924	1.06118	1.12588		167	0.722644
40.3	36	0.958036	1.05801	1.12776		167.5	0.772109
40.4	18.25	0.959139	1.05478	1.12951		168	0.799463
40.5	65.5	0.960218	1.05151	1.13111		168.5	0.877951
40.6	85.5	0.961294	1.0482	1.13257		169	0.888623
40.7	63.25	0.962391	1.04485	1.13392		169.5	0.87786
40.8	78.75	0.9635	1.04147	1.13514		170	0.986915
40.9	106.25	0.964624	1.03805	1.13624		170.5	0.953697
41	42	0.965782	1.0346	1.13724		171	1.05506
41.1	22	0.966944	1.03112	1.1381		171.5	1.09108
41.2	23.75	0.968081	1.02761	1.1388		172	1.1457
41.3	15.75	0.969188	1.02408	1.13935		172.5	1.16029
41.4	17	0.970261	1.02052	1.13972		173	1.07365
41.5	38.25	0.971297	1.01695	1.13993		173.5	1.1287
41.6	70.5	0.972309	1.01335	1.13998		174	1.28964
41.7	38.5	0.973318	1.00975	1.13989		174.5	1.24677
41.8	143	0.974316	1.00613	1.13966		175	1.13062
41.9	92	0.975351	1.0025	1.13931		175.5	1.12942
42	88.5	0.976422	0.998867	1.13886		176	1.26488
42.1	90	0.977513	0.995228	1.13828		176.5	1.19087
42.2	105.5	0.978623	0.991587	1.13759		177	1.20807
42.3	157.75	0.979761	0.987947	1.13678		177.5	1.15093
42.4	105	0.980958	0.98431	1.13588		178	1.12809
42.5	73.75	0.982198	0.980679	1.13489		178.5	1.11046
42.6	179.25	0.983449	0.977056	1.13377		179	1.1302
42.7	94.5	0.98476	0.973445	1.13256		179.5	1.15073
42.8	57.75	0.986113	0.969846	1.13126		180	1.09904
42.9	56.25	0.987461	0.966264	1.12983		180.5	1.10391
43	51.5	0.988795	0.9627	1.12826		181	1.04811
43.1	29.25	0.99011	0.959157	1.12654		181.5	0.986414
43.2	31.25	0.991391	0.955638	1.12467		182	0.989596
43.3	51.75	0.992633	0.952145	1.12264		182.5	1.03896
43.4	42.75	0.993848	0.94868	1.12047		183	0.920306
43.5	78.25	0.995034	0.945246	1.11816		183.5	1.0509
43.6	57.75	0.99621	0.941845	1.11572		184	0.94618
43.7	63.75	0.997372	0.93848	1.11315		184.5	0.982358
43.8	70	0.998517	0.935153	1.11045		185	0.974635
43.9	120	0.99965	0.931867	1.10763		185.5	0.946571
44	138.75	1.0008	0.928623	1.10472		186	0.892044
44.1	93.25	1.00199	0.925424	1.10173		186.5	0.929947
44.2	101	1.0032	0.922272	1.09865		187	0.900746
44.3	181.25	1.00441	0.91917	1.09548		187.5	0.889673
44.4	107.5	1.00569	0.916119	1.09226		188	0.972723
44.5	77.25	1.00699	0.913122	1.08898		188.5	0.898828
44.6	85	1.0083	0.910181	1.0856		189	0.852148
44.7	26.5	1.0096	0.907298	1.08212		189.5	0.842741
44.8	13.75	1.01086	0.904475	1.07853		190	0.835384
44.9	16.5	1.01206	0.901714	1.0748		190.5	0.896713
45	65.75	1.0132	0.899017	1.07095		191	0.895975
45.1	32.25	1.0143	0.896385	1.06698		191.5	0.852467
45.2	19.5	1.01536	0.893821	1.06291		192	0.944351
45.3	24.5	1.01635	0.891327	1.05872		192.5	0.979227
45.4	51.75	1.01729	0.888904	1.05442		193	0.966727
45.5	71	1.01819	0.886553	1.05002		193.5	1.04506
45.6	112	1.01905	0.884277	1.04554		194	0.970937
45.7	129.5	1.01992	0.882078	1.041		194.5	1.01893
45.8	141	1.02081	0.879956	1.03644		195	1.04762
45.9	114.25	1.02174	0.877913	1.03185		195.5	1.02299
46	147	1.02268	0.875951	1.02724		196	1.07484
46.1	144.75	1.02365	0.87407	1.02262		196.5	0.973313
46.2	103	1.02466	0.872273	1.01799		197	1.01288
46.3	98.75	1.02568	0.870561	1.01334		197.5	1.13833
46.4	70.25	1.0267	0.868935	1.00866		198	1.03516
46.5	77.5	1.02769	0.867395	1.00395		198.5	0.966319
46.6	65.25	1.02867	0.865943	0.999205		199	1.02294
46.7	62.75	1.02961	0.864581	0.99442		199.5	1.01214
46.8	35.25	1.03052	0.863308	0.989599		200	1.12377
46.9	41.25	1.03138	0.862126	0.984732		200.5	1.12926
47	29	1.03219	0.861036	0.979819		201	1.08618
47.1	17.75	1.03293	0.860039	0.974862		201.5	0.955221
47.2	39.75	1.0336	0.859134	0.969855		202	1.13973
47.3	50	1.03421	0.858324	0.964811		202.5	1.06396
47.4	52	1.03477	0.857607	0.959743		203	1.04031
47.5	82.5	1.03529	0.856986	0.954659		203.5	1.05871
47.6	98.75	1.03577	0.85646	0.949577		204	1.03582
47.7	51.75	1.03625	0.85603	0.944517		204.5	1.01194
47.8	46.75	1.03668	0.855695	0.939464		205	1.06189
47.9	25.25	1.03707	0.855457	0.934409		205.5	1.06799
48	50.75	1.0374	0.855315	0.929347		206	1.03954
48.1	89.75	1.03767	0.85527	0.924289		206.5	1.06974
48.2	101.25	1.03792	0.855322	0.919261		207	1.08901
48.3	129.25	1.03815	0.855469	0.914283		207.5	1.08114
48.4	131.75	1.0384	0.855713	0.909374		208	1.06791
48.5	83.5	1.03866	0.856054	0.904545		208.5	1.08591
48.6	80.25	1.03891	0.85649	0.89978		209	1.06747
48.7	59.75	1.03914	0.857022	0.89507		209.5	0.994877
48.8	58	1.03934	0.85765	0.890409		210	1.00156
48.9	26	1.03949	0.858372	0.885796		210.5	1.03703
49	35	1.03959	0.859188	0.88122		211	1.01117
49.1	13	1.03962	0.860099	0.876682		211.5	0.968649
49.2	49.5	1.03957	0.861102	0.872177		212	0.977325
49.3	51.75	1.03947	0.862198	0.867722		212.5	0.980912
49.4	49	1.03932	0.863385	0.86333		213	0.975563
49.5	22	1.03912	0.864664	0.859004		213.5	0.987532
49.6	32.5	1.03886	0.866032	0.854735		214	1.0122
49.7	58.25	1.03853	0.867489	0.850525		214.5	0.997699
49.8	11	1.03816	0.869034	0.846393		215	0.963002
49.9	21	1.03772	0.870666	0.842327		215.5	0.931902
50	49	1.03721	0.872384	0.838324		216	1.00613
50.1	64.5	1.03665	0.874186	0.834402		216.5	0.94815
50.2	99	1.03604	0.876072	0.83058		217	0.998856
50.3	49	1.03543	0.878039	0.826879		217.5	0.913339
50.4	55.25	1.03478	0.880087	0.823288		218	0.893175
50.5	84.5	1.0341	0.882214	0.819802		218.5	0.961621
50.6	109.5	1.03339	0.884418	0.81644		219	1.03755
50.7	114.5	1.03268	0.886699	0.813221		219.5	1.00353
50.8	79.75	1.03198	0.889054	0.810157		220	1.03567
50.9	59.75	1.03127	0.891482	0.807237		220.5	0.970567
51	42	1.03054	0.893981	0.804446		221	0.931451
51.1	33.5	1.02976	0.896549	0.801775		221.5	1.01417
51.2	61.75	1.02894	0.899185	0.799218		222	1.10493
51.3	108.25	1.02807	0.901886	0.796788		222.5	1.09425
51.4	102.75	1.02721	0.904651	0.794516		223	0.958756
51.5	44.75	1.02635	0.907478	0.792413		223.5	1.06808
51.6	11.25	1.02546	0.910365	0.790452		224	1.07398
51.7	30	1.02452	0.913309	0.788607		224.5	1.00597
51.8	59.25	1.02352	0.91631	0.786881		225	1.08969
51.9	63	1.02248	0.919364	0.785295		225.5	1.09474
52	42.5	1.02142	0.922469	0.783857		226	1.06924
52.1	82.75	1.02032	0.925624	0.782562		226.5	1.07439
52.2	41.5	1.01921	0.928826	0.781424		227	1.05514
52.3	109.25	1.01807	0.932072	0.780436		227.5	1.07124
52.4	25.5	1.01693	0.935361	0.779619		228	1.09278
52.5	52.5	1.01576	0.938691	0.778953		228.5	1.15647
52.6	87	1.01456	0.942058	0.778432		229	1.12332
52.7	87.25	1.01335	0.945461	0.778078		229.5	1.1045
52.8	139.25	1.01214	0.948897	0.777901		230	1.08904
52.9	125.25	1.01096	0.952364	0.777924		230.5	1.08748
53	131.5	1.00983	0.955859	0.778154		231	1.05743
53.1	121	1.00873	0.95938	0.778591		231.5	1.14505
53.2	120	1.00767	0.962924	0.77923		232	1.11517
53.3	113	1.00664	0.966489	0.78007		232.5	1.043
53.4	97.5	1.00564	0.970072	0.781106		233	1.03651
53.5	83.5	1.00467	0.973671	0.78233		233.5	1.07029
53.6	75.75	1.0037	0.977284	0.783731		234	1.12157
53.7	88.5	1.00273	0.980907	0.785301		234.5	1.0185
53.8	52.75	1.00177	0.984539	0.787045		235	1.00017
53.9	37.25	1.00079	0.988176	0.788948		235.5	0.952894
54	21.25	0.999794	0.991817	0.790993		236	0.975343
54.1	14	0.998755	0.995457	0.793169		236.5	0.993647
54.2	18.5	0.99767	0.999096	0.795468		237	0.985136
54.3	18.5	0.996539	1.00273	0.797888		237.5	0.981323
54.4	39.25	0.995364	1.00636	0.800429		238	1.05834
54.5	14.25	0.994158	1.00998	0.803099		238.5	1.05225
54.6	70.5	0.992914	1.01358	0.80589		239	1.05852
54.7	77.75	0.991656	1.01717	0.80882		239.5	1.05255
54.8	65.75	0.990406	1.02074	0.811902		240	0.981974
54.9	137.5	0.989158	1.0243	0.815132
55	113.25	0.98795	1.02783	0.818536
55.1	138	0.986789	1.03134	0.822118
55.2	127.5	0.985682	1.03482	0.82588
55.3	115.25	0.984632	1.03827	0.829821
55.4	118.75	0.983628	1.04168	0.83393
55.5	82	0.98267	1.04507	0.838202
55.6	95	0.981739	1.04841	0.84262
55.7	78.5	0.980833	1.05172	0.847176
55.8	45	0.979946	1.05499	0.851864
55.9	16.75	0.979056	1.05821	0.85666
56	15.75	0.978139	1.06138	0.861541
56.1	6	0.977187	1.06451	0.866497
56.2	20	0.976196	1.06759	0.871518
56.3	18.25	0.975171	1.07061	0.876606
56.4	87.75	0.974116	1.07358	0.881759
56.5	132.75	0.973069	1.07649	0.887005
56.6	119.5	0.972074	1.07935	0.892375
56.7	118.25	0.971138	1.08214	0.897869
56.8	154	0.970257	1.08487	0.90348
56.9	106	0.969449	1.08753	0.909219
57	125.75	0.968699	1.09013	0.915069
57.1	69.25	0.968004	1.09266	0.921022
57.2	70.75	0.96734	1.09512	0.927053
57.3	90.75	0.966691	1.09751	0.933145
57.4	122.75	0.96607	1.09982	0.939302
57.5	93	0.9655	1.10206	0.945539
57.6	74.75	0.964974	1.10422	0.951845
57.7	67.75	0.964473	1.1063	0.958199
57.8	18.75	0.963988	1.1083	0.964589
57.9	35.75	0.963492	1.11022	0.970987
58	27.5	0.962981	1.11206	0.977384
58.1	30.25	0.962455	1.11382	0.983774
58.2	51	0.961913	1.11549	0.990153
58.3	88.75	0.961368	1.11707	0.996525
58.4	52	0.960848	1.11857	1.00291
58.5	76.25	0.960342	1.11997	1.00929
58.6	25.25	0.959854	1.12129	1.01566
58.7	73.25	0.959362	1.12252	1.022
58.8	88.75	0.95888	1.12365	1.02832
58.9	95.75	0.95843	1.1247	1.03463
59	73.75	0.958019	1.12565	1.04094
59.1	64	0.957638	1.12651	1.04721
59.2	77	0.957275	1.12727	1.05346
59.3	90.75	0.956936	1.12794	1.05966
59.4	91.5	0.956631	1.12851	1.06583
59.5	94.5	0.956364	1.12899	1.07196
59.6	91	0.956137	1.12937	1.07805
59.7	63.25	0.95595	1.12966	1.0841
59.8	64.75	0.955786	1.12985	1.09008
59.9	83.25	0.955639	1.12994	1.09599
60	35.75	0.955518	1.12994	1.10182
60.1	15	0.955403	1.12984	1.10757
60.2	49.5	0.95527	1.12965	1.11319
60.3	67.25	0.955131	1.12935	1.11871
60.4	37.75	0.955007	1.12896	1.12412
60.5	35	0.954886	1.12848	1.12942
60.6	114.25	0.954758	1.1279	1.13459
60.7	181.5	0.954666	1.12723	1.13967
60.8	73.5	0.95467	1.12646	1.14469
60.9	128	0.954727	1.12559	1.14963
61	64.5	0.954837	1.12464	1.15447
61.1	37.25	0.954982	1.12359	1.15919
61.2	81.25	0.955127	1.12244	1.16377
61.3	78	0.95529	1.12121	1.16822
61.4	62	0.95548	1.11989	1.17253
61.5	43.75	0.955689	1.11847	1.1767
61.6	45.5	0.9559	1.11697	1.18071
61.7	32.75	0.95611	1.11538	1.18456
61.8	52	0.956313	1.11371	1.18823
61.9	80.5	0.956515	1.11195	1.19173
62	88	0.956737	1.11011	1.19508
62.1	37.75	0.956991	1.10818	1.19827
62.2	50.5	0.957251	1.10617	1.20129
62.3	22.25	0.95751	1.10408	1.20413
62.4	96	0.957756	1.10192	1.20677
62.5	68	0.958021	1.09968	1.20924
62.6	73.75	0.958311	1.09736	1.21154
62.7	152	0.95862	1.09497	1.21366
62.8	107.75	0.958992	1.0925	1.21565
62.9	101	0.959425	1.08997	1.21748
63	81	0.959902	1.08737	1.21916
63.1	125.25	0.96041	1.0847	1.22067
63.2	118.75	0.960967	1.08196	1.22202
63.3	124.5	0.961581	1.07917	1.22321
63.4	65.75	0.962252	1.07631	1.22426
63.5	139	0.962951	1.07339	1.22512
63.6	103	0.9637	1.07042	1.22582
63.7	79.25	0.964499	1.06739	1.22636
63.8	56	0.965324	1.06431	1.22672
63.9	57	0.966155	1.06118	1.22688
64	75	0.966986	1.05801	1.22683
64.1	25.5	0.967827	1.05478	1.22659
64.2	89.25	0.968655	1.05151	1.22614
64.3	136.75	0.96949	1.0482	1.22548
64.4	140.75	0.970377	1.04485	1.22467
64.5	93.5	0.971329	1.04147	1.22371
64.6	53	0.97232	1.03805	1.22258
64.7	37.25	0.973315	1.0346	1.22126
64.8	42.5	0.974293	1.03112	1.21972
64.9	14	0.975252	1.02761	1.21797
65	30.75	0.976178	1.02408	1.216
65.1	22.75	0.977072	1.02052	1.2138
65.2	47.5	0.977932	1.01695	1.21139
65.3	62.75	0.978771	1.01335	1.20876
65.4	46.25	0.979602	1.00975	1.20595
65.5	82.25	0.980421	1.00613	1.20293
65.6	114	0.981242	1.0025	1.19974
65.7	114	0.982093	0.998867	1.19638
65.8	97	0.98298	0.995228	1.19288
65.9	106.25	0.983895	0.991587	1.18923
66	86	0.984836	0.987947	1.18542
66.1	82.75	0.985795	0.98431	1.18146
66.2	23.75	0.986764	0.980679	1.17735
66.3	12	0.987708	0.977056	1.17305
66.4	26.25	0.988605	0.973445	1.16855
66.5	41.5	0.989458	0.969846	1.16386
66.6	36.25	0.99028	0.966264	1.15899
66.7	7.25	0.991071	0.9627	1.15396
66.8	29.25	0.991815	0.959157	1.14873
66.9	39	0.992513	0.955638	1.14333
67	61.5	0.993179	0.952145	1.13777
67.1	38.25	0.993826	0.94868	1.13207
67.2	64	0.994447	0.945246	1.12621
67.3	143.25	0.99505	0.941845	1.12022
67.4	156.25	0.995686	0.93848	1.11414
67.5	100.75	0.996382	0.935153	1.108
67.6	129.5	0.997111	0.931867	1.10178
67.7	104.25	0.997873	0.928623	1.09548
67.8	84	0.998662	0.925424	1.08911
67.9	48	0.999459	0.922272	1.08266
68	63.25	1.00024	0.91917	1.0761
68.1	87.25	1.001	0.916119	1.06945
68.2	108	1.00175	0.913122	1.06272
68.3	51.25	1.00252	0.910181	1.05594
68.4	78.75	1.00328	0.907298	1.04908
68.5	117.5	1.00403	0.904475	1.04215
68.6	94	1.00479	0.901714	1.03518
68.7	45.25	1.00556	0.899017	1.02818
68.8	44.5	1.00632	0.896385	1.02112
68.9	23.75	1.00704	0.893821	1.014
69	86.5	1.00771	0.891327	1.00681
69.1	82.25	1.00837	0.888904	0.999581
69.2	107	1.00902	0.886553	0.992332
69.3	110.75	1.00968	0.884277	0.98508
69.4	152.5	1.01035	0.882078	0.977837
69.5	123.25	1.01107	0.879956	0.970628
69.6	121.25	1.01182	0.877913	0.963455
69.7	130.5	1.0126	0.875951	0.956316
69.8	159.75	1.01341	0.87407	0.949221
69.9	137	1.01426	0.872273	0.94219
70	152.5	1.01516	0.870561	0.935226
70.1	116.75	1.0161	0.868935	0.928335
70.2	108.5	1.01707	0.867395	0.92151
70.3	54.25	1.01805	0.865943	0.914745
70.4	62	1.01901	0.864581	0.908019
70.5	67	1.01993	0.863308	0.901328
70.6	12.5	1.02084	0.862126	0.894682
70.7	21.5	1.02168	0.861036	0.888062
70.8	10.5	1.02246	0.860039	0.881466
70.9	37.5	1.02317	0.859134	0.874895
71	53.75	1.02382	0.858324	0.868366
71.1	55.25	1.02443	0.857607	0.861897
71.2	80.75	1.025	0.856986	0.855497
71.3	116.75	1.02555	0.85646	0.849184
71.4	80.75	1.0261	0.85603	0.842984
71.5	78.25	1.02664	0.855695	0.836896
71.6	72.75	1.02716	0.855457	0.830914
71.7	64.75	1.02767	0.855315	0.82504
71.8	64	1.02814	0.85527	0.819274
71.9	84.75	1.02858	0.855322	0.813619
72	103	1.02901	0.855469	0.808089
72.1	180.188	1.02942	0.855713	0.802702
72.2	180.188	1.02989	0.856054	0.797506
72.3	180.188	1.03044	0.85649	0.792528
72.4	180.188	1.03105	0.857022	0.787771
72.5	180.188	1.03174	0.85765	0.78324
72.6	180.188	1.03251	0.858372	0.778937
72.7	180.188	1.03334	0.859188	0.774867
72.8	180.188	1.03425	0.860099	0.771033
72.9	180.188	1.03523	0.861102	0.767438
73	180.188	1.03627	0.862198	0.764084
73.1	180.188	1.03739	0.863385	0.760975
73.2	180.188	1.03857	0.864664	0.758114
73.3	180.188	1.03982	0.866032	0.755502
73.4	180.188	1.04114	0.867489	0.753141
73.5	180.188	1.04252	0.869034	0.751035
73.6	180.188	1.04396	0.870666	0.749184
73.7	180.188	1.04547	0.872384	0.747591
73.8	180.188	1.04704	0.874186	0.746256
73.9	180.188	1.04867	0.876072	0.745182
74	180.188	1.05035	0.878039	0.744368
74.1	180.188	1.0521	0.880087	0.743816
74.2	180.188	1.0539	0.882214	0.743526
74.3	180.188	1.05576	0.884418	0.743499
74.4	180.188	1.05767	0.886699	0.743735
74.5	180.188	1.05963	0.889054	0.744234
74.6	180.188	1.06164	0.891482	0.744995
74.7	180.188	1.0637	0.893981	0.746019
74.8	180.188	1.06581	0.896549	0.747305
74.9	180.188	1.06797	0.899185	0.748851
75	180.188	1.07017	0.901886	0.750657
75.1	180.188	1.07242	0.904651	0.752721
75.2	180.188	1.0747	0.907478	0.755043
75.3	180.188	1.07703	0.910365	0.75762
75.4	180.188	1.0794	0.913309	0.760451
75.5	180.188	1.0818	0.91631	0.763533
75.6	180.188	1.08423	0.919364	0.766865
75.7	180.188	1.08671	0.922469	0.770444
75.8	180.188	1.08921	0.925624	0.774267
75.9	180.188	1.09174	0.928826	0.778331
76	180.188	1.0943	0.932072	0.782634
76.1	147	1.09689	0.935361	0.787172
76.2	105.5	1.09948	0.938691	0.79192
76.3	43	1.10203	0.942058	0.796846
76.4	10	1.10449	0.945461	0.801907
76.5	6.5	1.10684	0.948897	0.807072
76.6	32.25	1.10904	0.952364	0.812327
76.7	55	1.11113	0.955859	0.81768
76.8	45	1.11311	0.95938	0.823143
76.9	77.75	1.11499	0.962924	0.828712
77	36	1.11678	0.966489	0.834396
77.1	23.25	1.11847	0.970072	0.84018
77.2	42.5	1.12003	0.973671	0.846043
77.3	41	1.12148	0.977284	0.851989
77.4	13.25	1.12282	0.980907	0.858015
77.5	1.75	1.12402	0.984539	0.864106
77.6	20.25	1.12509	0.988176	0.870244
77.7	36.25	1.12602	0.991817	0.876432
77.8	50.75	1.12683	0.995457	0.882676
77.9	35.25	1.12752	0.999096	0.888982
78	9.75	1.12811	1.00273	0.895341
78.1	7.5	1.12856	1.00636	0.901735
78.2	36.5	1.12887	1.00998	0.908151
78.3	77.5	1.12905	1.01358	0.914598
78.4	128.25	1.12914	1.01717	0.921096
78.5	105.25	1.12918	1.02074	0.927672
78.6	83.75	1.12916	1.0243	0.934324
78.7	90.5	1.12908	1.02783	0.94103
78.8	115.5	1.12892	1.03134	0.947784
78.9	39	1.1287	1.03482	0.954595
79	27.25	1.12839	1.03827	0.961428
79.1	42.75	1.12796	1.04168	0.968255
79.2	31.5	1.12742	1.04507	0.975075
79.3	22.25	1.12677	1.04841	0.981883
79.4	54	1.12599	1.05172	0.988666
79.5	53.5	1.12511	1.05499	0.995432
79.6	77.75	1.12413	1.05821	1.00218
79.7	84.25	1.12307	1.06138	1.00892
79.8	77	1.12194	1.06451	1.01566
79.9	76.25	1.12074	1.06759	1.02238
80	23.75	1.11946	1.07061	1.02908
80.1	50.5	1.11808	1.07358	1.03574
80.2	56.5	1.11661	1.07649	1.04234
80.3	65	1.11504	1.07935	1.04889
80.4	99.5	1.11339	1.08214	1.05539
80.5	62.5	1.11169	1.08487	1.06185
80.6	52.25	1.10992	1.08753	1.06827
80.7	38.5	1.10807	1.09013	1.07462
80.8	76.25	1.10612	1.09266	1.08088
80.9	72.5	1.10411	1.09512	1.08708
81	89.5	1.10203	1.09751	1.0932
81.1	87.5	1.0999	1.09982	1.09926
81.2	93.25	1.09772	1.10206	1.10524
81.3	102.25	1.0955	1.10422	1.11116
81.4	87.25	1.09325	1.1063	1.11701
81.5	76.75	1.09095	1.1083	1.12277
81.6	79.5	1.08861	1.11022	1.12845
81.7	21.25	1.08622	1.11206	1.13402
81.8	16.75	1.08375	1.11382	1.13947
81.9	66.25	1.08119	1.11549	1.14477
82	85.5	1.07856	1.11707	1.14994
82.1	89.25	1.07589	1.11857	1.155
82.2	104.75	1.0732	1.11997	1.15995
82.3	56.5	1.07048	1.12129	1.16479
82.4	82.75	1.06772	1.12252	1.1695
82.5	71.25	1.06493	1.12365	1.17408
82.6	51.75	1.0621	1.1247	1.17852
82.7	38.5	1.05923	1.12565	1.18282
82.8	54.5	1.0563	1.12651	1.18695
82.9	40.75	1.05332	1.12727	1.19092
83	35	1.0503	1.12794	1.19472
83.1	93.5	1.04721	1.12851	1.19834
83.2	89.25	1.04411	1.12899	1.20182
83.3	102.5	1.04099	1.12937	1.20514
83.4	75.5	1.03788	1.12966	1.20832
83.5	59.5	1.03476	1.12985	1.21135
83.6	78.5	1.03162	1.12994	1.21421
83.7	98.5	1.02846	1.12994	1.2169
83.8	102.5	1.02531	1.12984	1.21944
83.9	96.25	1.02217	1.12965	1.22182
84	52.75	1.01905	1.12935	1.22405
84.1	45.25	1.01591	1.12896	1.22609
84.2	95.25	1.01275	1.12848	1.22795
84.3	64	1.0096	1.1279	1.22963
84.4	92	1.00644	1.12723	1.23113
84.5	58.25	1.0033	1.12646	1.23246
84.6	81.5	1.00015	1.12559	1.2336
84.7	123.25	0.997018	1.12464	1.23456
84.8	105.5	0.99392	1.12359	1.23536
84.9	114.5	0.990864	1.12244	1.236
85	49.5	0.987852	1.12121	1.23649
85.1	37.25	0.984852	1.11989	1.23678
85.2	48	0.981841	1.11847	1.23687
85.3	38.75	0.978824	1.11697	1.23676
85.4	64.5	0.975801	1.11538	1.23643
85.5	56.5	0.972785	1.11371	1.23591
85.6	99.25	0.96978	1.11195	1.2352
85.7	106	0.966811	1.11011	1.2343
85.8	99.25	0.963893	1.10818	1.23324
85.9	87.25	0.961027	1.10617	1.23202
86	102.25	0.958207	1.10408	1.23063
86.1	58.5	0.955437	1.10192	1.22907
86.2	44	0.952701	1.09968	1.22732
86.3	86.5	0.94998	1.09736	1.22538
86.4	109.25	0.947294	1.09497	1.22327
86.5	164.75	0.94467	1.0925	1.22099
86.6	114.25	0.942146	1.08997	1.21858
86.7	183.5	0.93971	1.08737	1.21604
86.8	133	0.937388	1.0847	1.21339
86.9	114.25	0.935172	1.08196	1.21062
87	68	0.933039	1.07917	1.20771
87.1	29.75	0.930959	1.07631	1.20464
87.2	56.25	0.928901	1.07339	1.20138
87.3	9.25	0.926868	1.07042	1.19794
87.4	74.25	0.924844	1.06739	1.19431
87.5	55	0.922853	1.06431	1.19051
87.6	87.75	0.920904	1.06118	1.18654
87.7	61	0.919009	1.05801	1.18242
87.8	33.5	0.917164	1.05478	1.17815
87.9	99.5	0.915349	1.05151	1.17371
88	90.5	0.913591	1.0482	1.16914
88.1	36.75	0.911907	1.04485	1.16443
88.2	46	0.910264	1.04147	1.15958
88.3	32.25	0.908653	1.03805	1.15457
88.4	49.25	0.907071	1.0346	1.14941
88.5	72.75	0.905524	1.03112	1.1441
88.6	70.5	0.904031	1.02761	1.13867
88.7	128	0.902596	1.02408	1.13311
88.8	90.5	0.901253	1.02052	1.12747
88.9	108.5	0.899997	1.01695	1.12173
89	102	0.898827	1.01335	1.11591
89.1	62	0.897746	1.00975	1.11001
89.2	56.25	0.89673	1.00613	1.10401
89.3	22	0.895765	1.0025	1.09791
89.4	30	0.894832	0.998867	1.09169
89.5	36.75	0.893926	0.995228	1.08536
89.6	48.75	0.893053	0.991587	1.07892
89.7	85	0.892222	0.987947	1.07239
89.8	62.25	0.891457	0.98431	1.06578
89.9	55.75	0.890755	0.980679	1.05911
90	13.25	0.890108	0.977056	1.05237
90.1	16.25	0.889489	0.973445	1.04555
90.2	42	0.888889	0.969846	1.03863
90.3	72.5	0.888324	0.966264	1.03164
90.4	97.25	0.887818	0.9627	1.0246
90.5	78.5	0.887392	0.959157	1.01754
90.6	70	0.887043	0.955638	1.01046
90.7	135.5	0.886761	0.952145	1.00336
90.8	176.75	0.88658	0.94868	0.996257
90.9	148.25	0.886541	0.945246	0.989207
91	57.25	0.886638	0.941845	0.982205
91.1	62.5	0.886812	0.93848	0.97521
91.2	38.25	0.887043	0.935153	0.968207
91.3	11	0.887316	0.931867	0.961193
91.4	7	0.887611	0.928623	0.954155
91.5	26.25	0.887917	0.925424	0.94709
91.6	54.75	0.888244	0.922272	0.940011
91.7	61.75	0.888613	0.91917	0.932941
91.8	44.25	0.889033	0.916119	0.925894
91.9	115.5	0.889499	0.913122	0.918871
92	152.25	0.890042	0.910181	0.911903
92.1	94	0.890703	0.907298	0.90503
92.2	74.25	0.891459	0.904475	0.898238
92.3	72.5	0.892282	0.901714	0.89151
92.4	47.75	0.893165	0.899017	0.884846
92.5	137.5	0.894093	0.896385	0.878239
92.6	139.75	0.895108	0.893821	0.871729
92.7	106.5	0.896234	0.891327	0.865343
92.8	60	0.897454	0.888904	0.85907
92.9	72.5	0.89873	0.886553	0.852886
93	80.5	0.900058	0.884277	0.846792
93.1	43.75	0.901442	0.882078	0.840798
93.2	33.75	0.902864	0.879956	0.834894
93.3	67.75	0.904308	0.877913	0.829072
93.4	99	0.905788	0.875951	0.823349
93.5	72.5	0.90733	0.87407	0.81775
93.6	53.75	0.908927	0.872273	0.812277
93.7	97	0.91056	0.870561	0.806917
93.8	135.75	0.912246	0.868935	0.801691
93.9	91	0.914017	0.867395	0.796629
94	188.5	0.915858	0.865943	0.791725
94.1	96	0.91781	0.864581	0.787015
94.2	39	0.919845	0.863308	0.782484
94.3	16	0.921906	0.862126	0.778088
94.4	62.25	0.923963	0.861036	0.773807
94.5	90	0.926034	0.860039	0.769659
94.6	77	0.928146	0.859134	0.765672
94.7	43.5	0.930297	0.858324	0.761849
94.8	39.25	0.932465	0.857607	0.758173
94.9	56.75	0.934635	0.856986	0.75464
95	57.75	0.936816	0.85646	0.751258
95.1	98.75	0.939011	0.85603	0.748034
95.2	62.25	0.941242	0.855695	0.74499
95.3	93.25	0.943498	0.855457	0.742121
95.4	26.5	0.945784	0.855315	0.739434
95.5	55.25	0.948072	0.85527	0.73691
95.6	76.5	0.950356	0.855322	0.734546
95.7	45.75	0.952656	0.855469	0.732362
95.8	31.5	0.954959	0.855713	0.730351
95.9	8.25	0.957246	0.856054	0.728499
96	66	0.9595	0.85649	0.726796
96.1	180.188	0.961745	0.857022	0.725263
96.2	180.188	0.964066	0.85765	0.723972
96.3	180.188	0.966497	0.858372	0.722955
96.4	180.188	0.969035	0.859188	0.722212
96.5	180.188	0.971679	0.860099	0.721743
96.6	180.188	0.974426	0.861102	0.721549
96.7	180.188	0.977275	0.862198	0.721629
96.8	180.188	0.980223	0.863385	0.721984
96.9	180.188	0.983268	0.864664	0.722613
97	180.188	0.986408	0.866032	0.723515
97.1	180.188	0.989641	0.867489	0.724691
97.2	180.188	0.992964	0.869034	0.726139
97.3	180.188	0.996374	0.870666	0.727857
97.4	180.188	0.99987	0.872384	0.729845
97.5	180.188	1.00345	0.874186	0.7321
97.6	180.188	1.00711	0.876072	0.734622
97.7	180.188	1.01084	0.878039	0.737408
97.8	180.188	1.01466	0.880087	0.740456
97.9	180.188	1.01854	0.882214	0.743763
98	180.188	1.02249	0.884418	0.747327
98.1	180.188	1.02652	0.886699	0.751146
98.2	180.188	1.0306	0.889054	0.755215
98.3	180.188	1.03475	0.891482	0.759533
98.4	180.188	1.03895	0.893981	0.764095
98.5	180.188	1.04321	0.896549	0.768899
98.6	180.188	1.04753	0.899185	0.77394
98.7	180.188	1.05189	0.901886	0.779214
98.8	180.188	1.0563	0.904651	0.784718
98.9	180.188	1.06076	0.907478	0.790447
99	180.188	1.06525	0.910365	0.796397
99.1	180.188	1.06979	0.913309	0.802563
99.2	180.188	1.07435	0.91631	0.808941
99.3	180.188	1.07896	0.919364	0.815525
99.4	180.188	1.08359	0.922469	0.822311
99.5	180.188	1.08824	0.925624	0.829293
99.6	180.188	1.09292	0.928826	0.836465
99.7	180.188	1.09762	0.932072	0.843823
99.8	180.188	1.10234	0.935361	0.851361
99.9	180.188	1.10707	0.938691	0.859073
100	180.188	1.11182	0.942058	0.866953
100.1	221.75	1.11657	0.945461	0.874995
100.2	155.75	1.12134	0.948897	0.883205
100.3	145	1.1261	0.952364	0.891554
100.4	87.5	1.13082	0.955859	0.900014
100.5	67.25	1.13546	0.95938	0.908551
100.6	41.5	1.14	0.962924	0.917137
100.7	40	1.14441	0.966489	0.925748
100.8	104.25	1.14868	0.970072	0.934372
100.9	47	1.15285	0.973671	0.943032
101	32.25	1.15689	0.977284	0.951708
101.1	51.5	1.16079	0.980907	0.960376
101.2	21	1.16455	0.984539	0.969034
101.3	47.75	1.16814	0.988176	0.977666
101.4	26.5	1.17159	0.991817	0.986271
101.5	67	1.17488	0.995457	0.994839
101.6	144	1.17803	0.999096	1.00338
101.7	110.75	1.18109	1.00273	1.01193
101.8	61	1.18406	1.00636	1.02048
101.9	54.5	1.1869	1.00998	1.029
102	4.25	1.18959	1.01358	1.03746
102.1	13	1.19211	1.01717	1.04585
102.2	12.75	1.19444	1.02074	1.05413
102.3	7.5	1.19659	1.0243	1.06232
102.4	37.25	1.19855	1.02783	1.0704
102.5	7.25	1.20033	1.03134	1.07837
102.6	5	1.20194	1.03482	1.08623
102.7	8.75	1.20335	1.03827	1.09396
102.8	5.75	1.20456	1.04168	1.10156
102.9	10	1.20559	1.04507	1.10902
103	34.75	1.20642	1.04841	1.11633
103.1	33.25	1.20708	1.05172	1.12351
103.2	83	1.20757	1.05499	1.13055
103.3	61.75	1.20792	1.05821	1.13747
103.4	56	1.20813	1.06138	1.14427
103.5	43.75	1.20818	1.06451	1.15094
103.6	28.5	1.20809	1.06759	1.15746
103.7	28.5	1.20782	1.07061	1.16382
103.8	27.75	1.20738	1.07358	1.17001
103.9	82.5	1.20678	1.07649	1.17602
104	85.25	1.20603	1.07935	1.18189
104.1	19	1.20516	1.08214	1.18761
104.2	9	1.20414	1.08487	1.19315
104.3	10.25	1.20293	1.08753	1.1985
104.4	42	1.20155	1.09013	1.20363
104.5	59.25	1.2	1.09266	1.20858
104.6	41.25	1.19831	1.09512	1.21334
104.7	5.75	1.19648	1.09751	1.21791
104.8	31	1.19448	1.09982	1.22226
104.9	93	1.19232	1.10206	1.22641
105	67.5	1.19005	1.10422	1.23037
105.1	45	1.18765	1.1063	1.23415
105.2	65.5	1.18513	1.1083	1.23773
105.3	45.25	1.18249	1.11022	1.24111
105.4	103.25	1.17971	1.11206	1.24428
105.5	85.5	1.17684	1.11382	1.24727
105.6	55	1.17388	1.11549	1.25007
105.7	45.75	1.17081	1.11707	1.25268
105.8	23.75	1.16761	1.11857	1.25506
105.9	9.75	1.16429	1.11997	1.25722
106	25.75	1.16081	1.12129	1.25914
106.1	82.25	1.15721	1.12252	1.26082
106.2	71.75	1.1535	1.12365	1.26229
106.3	57	1.14971	1.1247	1.26355
106.4	35	1.14582	1.12565	1.26461
106.5	38.75	1.14183	1.12651	1.26543
106.6	25.25	1.13773	1.12727	1.26603
106.7	21.5	1.13351	1.12794	1.26639
106.8	7.5	1.12918	1.12851	1.26651
106.9	37.5	1.12473	1.12899	1.26638
107	27.5	1.12018	1.12937	1.26602
107.1	63.5	1.11552	1.12966	1.26543
107.2	120.5	1.11079	1.12985	1.26461
107.3	120.25	1.10603	1.12994	1.26361
107.4	87.75	1.10124	1.12994	1.26245
107.5	53	1.09643	1.12984	1.26109
107.6	71	1.09157	1.12965	1.25954
107.7	109.25	1.08665	1.12935	1.25778
107.8	47	1.08171	1.12896	1.25584
107.9	53	1.07673	1.12848	1.2537
108	22	1.07169	1.1279	1.25135
108.1	12.25	1.06659	1.12723	1.24878
108.2	13.75	1.06141	1.12646	1.24599
108.3	34.5	1.05616	1.12559	1.24297
108.4	70.25	1.05085	1.12464	1.23973
108.5	29.75	1.04551	1.12359	1.2363
108.6	115	1.04013	1.12244	1.23267
108.7	105.25	1.03476	1.12121	1.22888
108.8	92.25	1.0294	1.11989	1.22494
108.9	68.75	1.02406	1.11847	1.22084
109	177.75	1.01872	1.11697	1.21658
109.1	137.75	1.01344	1.11538	1.2122
109.2	144	1.00823	1.11371	1.20772
109.3	135.25	1.00309	1.11195	1.20313
109.4	107	0.99801	1.11011	1.19842
109.5	61.25	0.992982	1.10818	1.1936
109.6	65.75	0.987975	1.10617	1.18864
109.7	24	0.982981	1.10408	1.18353
109.8	19	0.977982	1.10192	1.17825
109.9	18.5	0.972967	1.09968	1.17281
110	29.75	0.967937	1.09736	1.1672
110.1	60.5	0.962901	1.09497	1.16143
110.2	94	0.957884	1.0925	1.15552
110.3	168.5	0.952914	1.08997	1.14951
110.4	163.5	0.948045	1.08737	1.14343
110.5	114.75	0.943298	1.0847	1.13731
110.6	50.25	0.938646	1.08196	1.13112
110.7	6.25	0.934043	1.07917	1.12484
110.8	9.5	0.929451	1.07631	1.11842
110.9	12.25	0.924861	1.07339	1.11188
111	13	0.920279	1.07042	1.1052
111.1	40.25	0.915709	1.06739	1.09841
111.2	70	0.911169	1.06431	1.09151
111.3	29.25	0.906686	1.06118	1.08454
111.4	40.75	0.902248	1.05801	1.07748
111.5	116	0.897853	1.05478	1.07034
111.6	84.75	0.893547	1.05151	1.06316
111.7	57.5	0.889337	1.0482	1.05595
111.8	104.75	0.885202	1.04485	1.04869
111.9	114.25	0.881162	1.04147	1.0414
112	145.5	0.877237	1.03805	1.03411
112.1	119.5	0.87345	1.0346	1.02684
112.2	104.25	0.869797	1.03112	1.01958
112.3	55	0.866264	1.02761	1.01233
112.4	9.5	0.862821	1.02408	1.00506
112.5	39	0.859432	1.02052	0.997763
112.6	9.25	0.856103	1.01695	0.990432
112.7	32.75	0.852826	1.01335	0.98307
112.8	36.75	0.84961	1.00975	0.975686
112.9	87	0.846463	1.00613	0.968292
113	99.5	0.843417	1.0025	0.960918
113.1	117.75	0.840494	0.998867	0.953586
113.2	121.25	0.837709	0.995228	0.946312
113.3	79	0.835069	0.991587	0.939107
113.4	121.75	0.832554	0.987947	0.931958
113.5	112.75	0.830177	0.98431	0.92488
113.6	103.75	0.827946	0.980679	0.917884
113.7	84	0.825853	0.977056	0.910967
113.8	158.25	0.823887	0.973445	0.904125
113.9	67.25	0.822084	0.969846	0.897391
114	3.5	0.820415	0.966264	0.890746
114.1	37.75	0.818819	0.9627	0.884144
114.2	42	0.8173	0.959157	0.877592
114.3	56	0.815869	0.955638	0.871103
114.4	25.75	0.814536	0.952145	0.864689
114.5	21	0.813289	0.94868	0.858346
114.6	12.75	0.812118	0.945246	0.852067
114.7	14.75	0.811016	0.941845	0.845853
114.8	45.5	0.809984	0.93848	0.839707
114.9	52	0.809038	0.935153	0.833648
115	100.5	0.808192	0.931867	0.827689
115.1	115	0.807474	0.928623	0.82186
115.2	76.5	0.806906	0.925424	0.816181
115.3	101.75	0.806469	0.922272	0.810641
115.4	75.25	0.806167	0.91917	0.805249
115.5	123.25	0.805992	0.916119	0.8
115.6	96.25	0.805963	0.913122	0.794914
115.7	101	0.806078	0.910181	0.789993
115.8	121.5	0.806331	0.907298	0.785238
115.9	62.75	0.806735	0.904475	0.78066
116	33.5	0.807261	0.901714	0.776241
116.1	63.75	0.807876	0.899017	0.771958
116.2	43.5	0.80859	0.896385	0.767821
116.3	8.75	0.809397	0.893821	0.76383
116.4	20.5	0.810273	0.891327	0.759966
116.5	43.5	0.811214	0.888904	0.756231
116.6	18	0.812234	0.886553	0.752641
116.7	63.5	0.813326	0.884277	0.749189
116.8	89.75	0.814505	0.882078	0.745896
116.9	88.75	0.815799	0.879956	0.742783
117	97.5	0.817212	0.877913	0.73986
117.1	63.25	0.818748	0.875951	0.737131
117.2	17	0.820388	0.87407	0.734584
117.3	72.75	0.822097	0.872273	0.732193
117.4	25.75	0.823892	0.870561	0.729974
117.5	48.5	0.825759	0.868935	0.72792
117.6	12	0.827698	0.867395	0.72603
117.7	16	0.829694	0.865943	0.724296
117.8	41.25	0.831736	0.864581	0.722712
117.9	30	0.833838	0.863308	0.72129
118	74.5	0.836	0.862126	0.720033
118.1	53.75	0.838241	0.861036	0.718958
118.2	70.5	0.840561	0.860039	0.718068
118.3	10.75	0.842962	0.859134	0.717364
118.4	11.5	0.845412	0.858324	0.716825
118.5	89.5	0.847895	0.857607	0.716437
118.6	116	0.850452	0.856986	0.716235
118.7	113.75	0.853117	0.85646	0.71625
118.8	61.5	0.855894	0.85603	0.716486
118.9	25.5	0.858752	0.855695	0.716918
119	58.75	0.861654	0.855457	0.717518
119.1	105	0.864607	0.855315	0.718291
119.2	87.75	0.867643	0.85527	0.719266
119.3	79	0.870763	0.855322	0.720444
119.4	44.5	0.873956	0.855469	0.721817
119.5	54.75	0.877197	0.855713	0.723365
119.6	95	0.880482	0.856054	0.725083
119.7	43.5	0.883831	0.85649	0.726992
119.8	78.5	0.887227	0.857022	0.729075
119.9	71.5	0.890672	0.85765	0.731334
120	55.25	0.894168	0.858372	0.733772
120.1	180.188	0.897704	0.859188	0.736379
120.2	180.188	0.901348	0.860099	0.739212
120.3	180.188	0.905136	0.861102	0.7423
120.4	180.188	0.909066	0.862198	0.74564
120.5	180.188	0.913134	0.863385	0.749229
120.6	180.188	0.917337	0.864664	0.753065
120.7	180.188	0.921672	0.866032	0.757145
120.8	180.188	0.926136	0.867489	0.761465
120.9	180.188	0.930726	0.869034	0.766021
121	180.188	0.935438	0.870666	0.77081
121.1	180.188	0.940268	0.872384	0.775828
121.2	180.188	0.945215	0.874186	0.781071
121.3	180.188	0.950273	0.876072	0.786535
121.4	180.188	0.955439	0.878039	0.792216
121.5	180.188	0.960711	0.880087	0.798108
121.6	180.188	0.966083	0.882214	0.804208
121.7	180.188	0.971553	0.884418	0.81051
121.8	180.188	0.977116	0.886699	0.817009
121.9	180.188	0.982769	0.889054	0.823701
122	180.188	0.988507	0.891482	0.83058
122.1	180.188	0.994328	0.893981	0.837641
122.2	180.188	1.00023	0.896549	0.844878
122.3	180.188	1.0062	0.899185	0.852286
122.4	180.188	1.01224	0.901886	0.859859
122.5	180.188	1.01835	0.904651	0.86759
122.6	180.188	1.02452	0.907478	0.875475
122.7	180.188	1.03075	0.910365	0.883506
122.8	180.188	1.03703	0.913309	0.891678
122.9	180.188	1.04336	0.91631	0.899985
123	180.188	1.04974	0.919364	0.908419
123.1	180.188	1.05615	0.922469	0.916976
123.2	180.188	1.06261	0.925624	0.925647
123.3	180.188	1.0691	0.928826	0.934426
123.4	180.188	1.07561	0.932072	0.943307
123.5	180.188	1.08215	0.935361	0.952283
123.6	180.188	1.08871	0.938691	0.961347
123.7	180.188	1.09529	0.942058	0.970491
123.8	180.188	1.10188	0.945461	0.97971
123.9	180.188	1.10847	0.948897	0.988997
124	180.188	1.11507	0.952364	0.998343
124.1	156.5	1.12167	0.955859	1.00774
124.2	164	1.12825	0.95938	1.01717
124.3	56.75	1.13478	0.962924	1.02661
124.4	6	1.14122	0.966489	1.03602
124.5	9	1.14751	0.970072	1.04534
124.6	5.25	1.15362	0.973671	1.05454
124.7	5.25	1.15955	0.977284	1.06363
124.8	18.25	1.1653	0.980907	1.0726
124.9	6.5	1.17087	0.984539	1.08144
125	34.75	1.17626	0.988176	1.09014
125.1	69.25	1.18147	0.991817	1.09872
125.2	37.75	1.18653	0.995457	1.10719
125.3	20	1.19144	0.999096	1.11552
125.4	14.25	1.19616	1.00273	1.12371
125.5	8.25	1.20069	1.00636	1.13174
125.6	12.5	1.20502	1.00998	1.13961
125.7	73.5	1.20915	1.01358	1.14729
125.8	26	1.21311	1.01717	1.15483
125.9	50	1.2169	1.02074	1.1622
126	69.25	1.2205	1.0243	1.1694
126.1	73.5	1.22394	1.02783	1.17645
126.2	35.25	1.22722	1.03134	1.18333
126.3	107.25	1.23033	1.03482	1.19003
126.4	21.75	1.23328	1.03827	1.19658
126.5	52.5	1.23605	1.04168	1.20293
126.6	47.75	1.23863	1.04507	1.20909
126.7	41.75	1.24102	1.04841	1.21505
126.8	35.75	1.24323	1.05172	1.22081
126.9	29.5	1.24525	1.05499	1.22636
127	40	1.24706	1.05821	1.23169
127.1	19.5	1.24868	1.06138	1.23679
127.2	5	1.25009	1.06451	1.24167
127.3	36.25	1.25128	1.06759	1.2463
127.4	23.25	1.25227	1.07061	1.25069
127.5	12.5	1.25306	1.07358	1.25485
127.6	17.5	1.25363	1.07649	1.25875
127.7	26.25	1.25398	1.07935	1.26241
127.8	24.25	1.25413	1.08214	1.26582
127.9	12.5	1.25408	1.08487	1.26898
128	83.75	1.25381	1.08753	1.27188
128.1	44.5	1.25337	1.09013	1.27455
128.2	117.5	1.25276	1.09266	1.27699
128.3	90.5	1.252	1.09512	1.27923
128.4	67	1.25111	1.09751	1.28125
128.5	41.25	1.25005	1.09982	1.28306
128.6	54.75	1.24882	1.10206	1.28462
128.7	25.25	1.24741	1.10422	1.28594
128.8	18	1.24582	1.1063	1.28701
128.9	36.25	1.24403	1.1083	1.28782
129	27	1.24205	1.11022	1.28837
129.1	33.5	1.23989	1.11206	1.28867
129.2	40.5	1.23754	1.11382	1.28871
129.3	84.5	1.23503	1.11549	1.2885
129.4	93.75	1.23236	1.11707	1.28807
129.5	90.5	1.22957	1.11857	1.28743
129.6	70.75	1.22666	1.11997	1.28657
129.7	87.75	1.22361	1.12129	1.2855
129.8	70.5	1.22043	1.12252	1.28421
129.9	112.5	1.21713	1.12365	1.28271
130	13.75	1.21372	1.1247	1.28101
130.1	19	1.21016	1.12565	1.27907
130.2	58.75	1.20643	1.12651	1.27689
130.3	22.75	1.20255	1.12727	1.27447
130.4	30.5	1.19853	1.12794	1.27182
130.5	72.25	1.19435	1.12851	1.26894
130.6	61	1.19005	1.12899	1.26584
130.7	76	1.18564	1.12937	1.26253
130.8	100.5	1.18112	1.12966	1.25903
130.9	90	1.17651	1.12985	1.25535
131	52.75	1.17182	1.12994	1.25149
131.1	85.5	1.16702	1.12994	1.24743
131.2	67.5	1.16214	1.12984	1.24319
131.3	137.5	1.15716	1.12965	1.23878
131.4	51.5	1.15214	1.12935	1.23421
131.5	8.5	1.14704	1.12896	1.22948
131.6	4.5	1.14182	1.12848	1.22454
131.7	7.25	1.13647	1.1279	1.2194
131.8	31.75	1.13099	1.12723	1.21404
131.9	73.25	1.1254	1.12646	1.2085
132	156.25	1.11974	1.12559	1.2028
132.1	102	1.11407	1.12464	1.19699
132.2	147	1.10837	1.12359	1.19107
132.3	107	1.10268	1.12244	1.18505
132.4	65.5	1.09697	1.12121	1.17893
132.5	55.5	1.09123	1.11989	1.17269
132.6	100.5	1.08543	1.11847	1.16631
132.7	99.5	1.0796	1.11697	1.15983
132.8	35.25	1.07376	1.11538	1.15325
132.9	66.25	1.06788	1.11371	1.14655
133	44.75	1.06196	1.11195	1.13974
133.1	37.25	1.056	1.11011	1.13282
133.2	41.75	1.04999	1.10818	1.12579
133.3	59.5	1.04394	1.10617	1.11864
133.4	78.5	1.03786	1.10408	1.11141
133.5	82.5	1.03178	1.10192	1.10409
133.6	72.25	1.0257	1.09968	1.09672
133.7	117.25	1.01962	1.09736	1.08928
133.8	83.75	1.01357	1.09497	1.0818
133.9	75.75	1.00755	1.0925	1.07429
134	44.75	1.00155	1.08997	1.06673
134.1	60.75	0.995544	1.08737	1.05912
134.2	71.75	0.989545	1.0847	1.05147
134.3	101	0.983565	1.08196	1.04378
134.4	82.75	0.977627	1.07917	1.03608
134.5	74.5	0.971733	1.07631	1.02837
134.6	50.75	0.965876	1.07339	1.02065
134.7	29.5	0.960045	1.07042	1.01292
134.8	13.75	0.954225	1.06739	1.00516
134.9	36.25	0.948406	1.06431	0.99737
135	68.5	0.942598	1.06118	0.98956
135.1	54.5	0.93683	1.05801	0.981757
135.2	63.75	0.931106	1.05478	0.973966
135.3	78	0.925431	1.05151	0.966196
135.4	69.75	0.919819	1.0482	0.958459
135.5	129	0.914272	1.04485	0.950761
135.6	54.25	0.908823	1.04147	0.943133
135.7	73	0.903452	1.03805	0.935559
135.8	82.5	0.89815	1.0346	0.928037
135.9	69.5	0.892932	1.03112	0.920581
136	76.75	0.887796	1.02761	0.913191
136.1	56.75	0.882745	1.02408	0.905874
136.2	44.5	0.877773	1.02052	0.898628
136.3	85.5	0.87287	1.01695	0.891447
136.4	26.75	0.868059	1.01335	0.884353
136.5	10.25	0.863322	1.00975	0.877332
136.6	45.75	0.858635	1.00613	0.87037
136.7	19.75	0.854017	1.0025	0.863483
136.8	28.25	0.849465	0.998867	0.856672
136.9	45.5	0.84498	0.995228	0.849941
137	87	0.840577	0.991587	0.843303
137.1	25.75	0.836284	0.987947	0.836787
137.2	13.75	0.832083	0.98431	0.830377
137.3	68.5	0.827952	0.980679	0.82406
137.4	121.75	0.82392	0.977056	0.817861
137.5	96.5	0.820034	0.973445	0.811822
137.6	107.5	0.816297	0.969846	0.805947
137.7	54.75	0.812709	0.966264	0.800239
137.8	96.25	0.809245	0.9627	0.794681
137.9	59.25	0.805917	0.959157	0.789282
138	83	0.802717	0.955638	0.78404
138.1	108	0.799649	0.952145	0.77896
138.2	82.5	0.796735	0.94868	0.774062
138.3	99.75	0.793969	0.945246	0.769344
138.4	103.5	0.791355	0.941845	0.764809
138.5	102.5	0.788901	0.93848	0.760467
138.6	98.5	0.786607	0.935153	0.756321
138.7	74	0.784473	0.931867	0.752371
138.8	69	0.782485	0.928623	0.748608
138.9	54.25	0.780634	0.925424	0.745026
139	40.5	0.778911	0.922272	0.741619
139.1	28.75	0.777305	0.91917	0.738379
139.2	40	0.775806	0.916119	0.735301
139.3	44	0.774419	0.913122	0.732387
139.4	92.5	0.773148	0.910181	0.729645
139.5	85	0.772022	0.907298	0.727099
139.6	112.5	0.771051	0.904475	0.724757
139.7	111.5	0.770247	0.901714	0.722632
139.8	54.75	0.769617	0.899017	0.720729
139.9	99.5	0.76913	0.896385	0.719025
140	131	0.768794	0.893821	0.717526
140.1	41.75	0.768639	0.891327	0.716259
140.2	12.5	0.768624	0.888904	0.715189
140.3	60.25	0.768707	0.886553	0.714284
140.4	35	0.768907	0.884277	0.713559
140.5	31	0.769222	0.882078	0.713012
140.6	51.75	0.769642	0.879956	0.712637
140.7	30.5	0.770178	0.877913	0.712442
140.8	64.25	0.770822	0.875951	0.712421
140.9	65.5	0.771586	0.87407	0.712584
141	91.25	0.772479	0.872273	0.712939
141.1	47.25	0.773516	0.870561	0.713497
141.2	34.75	0.774676	0.868935	0.714243
141.3	51.25	0.775941	0.867395	0.715159
141.4	34.25	0.777315	0.865943	0.71625
141.5	62.75	0.778792	0.864581	0.71751
141.6	61	0.780381	0.863308	0.718947
141.7	68.5	0.782089	0.862126	0.720565
141.8	78	0.783916	0.861036	0.722365
141.9	72	0.785869	0.860039	0.724351
142	56.75	0.787946	0.859134	0.72652
142.1	67.5	0.790134	0.858324	0.728863
142.2	41.75	0.792433	0.857607	0.731379
142.3	36.5	0.794832	0.856986	0.734055
142.4	79.25	0.797317	0.85646	0.736881
142.5	83.25	0.799909	0.85603	0.739873
142.6	98.75	0.80262	0.855695	0.74304
142.7	104.5	0.805457	0.855457	0.746387
142.8	75.25	0.808425	0.855315	0.749917
142.9	68.75	0.811509	0.85527	0.753614
143	51	0.814693	0.855322	0.757467
143.1	58	0.817964	0.855469	0.761462
143.2	88	0.821318	0.855713	0.765596
143.3	81.25	0.824772	0.856054	0.769879
143.4	21	0.828327	0.85649	0.774312
143.5	42.25	0.831946	0.857022	0.778862
143.6	11.5	0.835622	0.85765	0.783523
143.7	40.5	0.839341	0.858372	0.78828
143.8	37.75	0.843107	0.859188	0.793137
143.9	36.25	0.846926	0.860099	0.798095
144	97.75	0.850792	0.861102	0.803148
144.1	180.188	0.854737	0.862198	0.80832
144.2	180.188	0.858827	0.863385	0.813665
144.3	180.188	0.863087	0.864664	0.8192
144.4	180.188	0.867512	0.866032	0.824921
144.5	180.188	0.8721	0.867489	0.830824
144.6	180.188	0.876848	0.869034	0.836903
144.7	180.188	0.881751	0.870666	0.843154
144.8	180.188	0.886805	0.872384	0.849572
144.9	180.188	0.892008	0.874186	0.856151
145	180.188	0.897356	0.876072	0.862886
145.1	180.188	0.902844	0.878039	0.869773
145.2	180.188	0.908468	0.880087	0.876806
145.3	180.188	0.914225	0.882214	0.883978
145.4	180.188	0.920111	0.884418	0.891286
145.5	180.188	0.926121	0.886699	0.898722
145.6	180.188	0.932251	0.889054	0.906281
145.7	180.188	0.938496	0.891482	0.913958
145.8	180.188	0.944854	0.893981	0.921746
145.9	180.188	0.951318	0.896549	0.929639
146	180.188	0.957885	0.899185	0.937632
146.1	180.188	0.96455	0.901886	0.945717
146.2	180.188	0.971309	0.904651	0.95389
146.3	180.188	0.978157	0.907478	0.962143
146.4	180.188	0.985089	0.910365	0.970471
146.5	180.188	0.992101	0.913309	0.978867
146.6	180.188	0.999188	0.91631	0.987324
146.7	180.188	1.00635	0.919364	0.995837
146.8	180.188	1.01357	0.922469	1.0044
146.9	180.188	1.02085	0.925624	1.013
147	180.188	1.02819	0.928826	1.02164
147.1	180.188	1.03558	0.932072	1.03031
147.2	180.188	1.04302	0.935361	1.039
147.3	180.188	1.0505	0.938691	1.04771
147.4	180.188	1.05802	0.942058	1.05643
147.5	180.188	1.06556	0.945461	1.06516
147.6	180.188	1.07314	0.948897	1.07387
147.7	180.188	1.08074	0.952364	1.08258
147.8	180.188	1.08835	0.955859	1.09128
147.9	180.188	1.09598	0.95938	1.09995
148	180.188	1.10361	0.962924	1.10859
148.1	201.5	1.11125	0.966489	1.1172
148.2	143	1.11889	0.970072	1.12577
148.3	31.5	1.12649	0.973671	1.13427
148.4	17.5	1.13398	0.977284	1.14263
148.5	2	1.14132	0.980907	1.15082
148.6	6	1.14848	0.984539	1.15881
148.7	41.5	1.15546	0.988176	1.1666
148.8	30.25	1.16227	0.991817	1.1742
148.9	61	1.16893	0.995457	1.18161
149	45.5	1.17542	0.999096	1.18884
149.1	48	1.18177	1.00273	1.19588
149.2	46.75	1.18795	1.00636	1.20272
149.3	11	1.19396	1.00998	1.20936
149.4	8	1.19979	1.01358	1.21577
149.5	5.5	1.20541	1.01717	1.22196
149.6	17.25	1.21082	1.02074	1.22789
149.7	32	1.21602	1.0243	1.23359
149.8	50.75	1.22103	1.02783	1.23906
149.9	89.5	1.22585	1.03134	1.24429
150	32.25	1.23052	1.03482	1.24932
150.1	70.75	1.235	1.03827	1.25412
150.2	46	1.23929	1.04168	1.25869
150.3	54.75	1.24341	1.04507	1.26303
150.4	20.25	1.24733	1.04841	1.26713
150.5	3.75	1.25104	1.05172	1.27098
150.6	15.25	1.25453	1.05499	1.27456
150.7	26.5	1.25778	1.05821	1.27787
150.8	12.25	1.26082	1.06138	1.28091
150.9	14.75	1.26363	1.06451	1.28369
151	7.25	1.26622	1.06759	1.28619
151.1	58.75	1.26857	1.07061	1.28841
151.2	51	1.27071	1.07358	1.29037
151.3	45.75	1.27265	1.07649	1.29209
151.4	37	1.27439	1.07935	1.29355
151.5	86.5	1.27592	1.08214	1.29476
151.6	49.5	1.27726	1.08487	1.29572
151.7	61	1.27841	1.08753	1.29644
151.8	53.25	1.27937	1.09013	1.29691
151.9	29	1.28012	1.09266	1.29714
152	14.5	1.28066	1.09512	1.2971
152.1	2.75	1.28098	1.09751	1.2968
152.2	12	1.28106	1.09982	1.29621
152.3	77.5	1.2809	1.10206	1.29535
152.4	90.75	1.28055	1.10422	1.29424
152.5	86.25	1.28003	1.1063	1.29292
152.6	76.25	1.27935	1.1083	1.29138
152.7	96.5	1.27849	1.11022	1.28961
152.8	64	1.27747	1.11206	1.28764
152.9	65.5	1.27627	1.11382	1.28544
153	34.75	1.27489	1.11549	1.28302
153.1	58.75	1.27332	1.11707	1.28036
153.2	97	1.27156	1.11857	1.27748
153.3	113	1.26964	1.11997	1.27439
153.4	111.75	1.26758	1.12129	1.27112
153.5	69.5	1.26539	1.12252	1.26767
153.6	45.5	1.26304	1.12365	1.26403
153.7	59	1.26052	1.1247	1.26017
153.8	57.75	1.25782	1.12565	1.25611
153.9	21.75	1.25495	1.12651	1.25184
154	14.5	1.2519	1.12727	1.24737
154.1	42.25	1.24864	1.12794	1.24267
154.2	77.5	1.24521	1.12851	1.23777
154.3	52.25	1.24162	1.12899	1.23269
154.4	90.25	1.23788	1.12937	1.22743
154.5	90	1.234	1.12966	1.22201
154.6	59.75	1.23	1.12985	1.21643
154.7	34.5	1.22586	1.12994	1.21071
154.8	16.75	1.22156	1.12994	1.20481
154.9	24.25	1.21709	1.12984	1.19873
155	24	1.21246	1.12965	1.19247
155.1	30.25	1.20767	1.12935	1.18605
155.2	30.5	1.20271	1.12896	1.17947
155.3	40.25	1.19761	1.12848	1.17273
155.4	6.75	1.19237	1.1279	1.16585
155.5	32	1.18698	1.12723	1.15882
155.6	48.25	1.18145	1.12646	1.15164
155.7	80.75	1.17579	1.12559	1.14435
155.8	83.75	1.17003	1.12464	1.13696
155.9	55.5	1.16419	1.12359	1.12948
156	66.25	1.15825	1.12244	1.12192
156.1	116.25	1.15223	1.12121	1.11427
156.2	104.5	1.14615	1.11989	1.10656
156.3	61.5	1.14002	1.11847	1.09882
156.4	41.5	1.13382	1.11697	1.09102
156.5	20.5	1.12754	1.11538	1.08314
156.6	56.5	1.12116	1.11371	1.07519
156.7	67.75	1.11469	1.11195	1.06718
156.8	70.25	1.10817	1.11011	1.05913
156.9	70.25	1.10159	1.10818	1.05105
157	61.25	1.09497	1.10617	1.04294
157.1	51.5	1.08829	1.10408	1.03481
157.2	79.5	1.08157	1.10192	1.02666
157.3	94.5	1.07481	1.09968	1.0185
157.4	125.25	1.06804	1.09736	1.01036
157.5	104.75	1.06128	1.09497	1.00225
157.6	52.25	1.05453	1.0925	0.994189
157.7	45	1.04776	1.08997	0.986142
157.8	44	1.04097	1.08737	0.978105
157.9	39	1.03414	1.0847	0.970081
158	15	1.02728	1.08196	0.962074
158.1	31.25	1.02039	1.07917	0.954077
158.2	62.5	1.01346	1.07631	0.946099
158.3	109.25	1.00653	1.07339	0.938163
158.4	90	0.999634	1.07042	0.930304
158.5	42.75	0.992775	1.06739	0.922529
158.6	6	0.985929	1.06431	0.914817
158.7	20	0.979066	1.06118	0.907147
158.8	32.5	0.972188	1.05801	0.899523
158.9	78.5	0.965311	1.05478	0.891959
159	95.75	0.958467	1.05151	0.884484
159.1	83	0.951683	1.0482	0.877121
159.2	92.5	0.944961	1.04485	0.869875
159.3	74.5	0.938306	1.04147	0.862751
159.4	97.5	0.931715	1.03805	0.855748
159.5	85.25	0.9252	1.0346	0.848878
159.6	45.5	0.918763	1.03112	0.842145
159.7	62	0.912384	1.02761	0.835532
159.8	73.5	0.906065	1.02408	0.829044
159.9	33.25	0.89982	1.02052	0.822692
160	41.5	0.893633	1.01695	0.816467
160.1	17	0.887502	1.01335	0.810365
160.2	46.5	0.88142	1.00975	0.804384
160.3	67.5	0.875399	1.00613	0.798533
160.4	35.75	0.869463	1.0025	0.792834
160.5	8	0.863604	0.998867	0.787281
160.6	25	0.8578	0.995228	0.781857
160.7	77	0.852058	0.991587	0.776567
160.8	78.5	0.846413	0.987947	0.771442
160.9	52.5	0.840884	0.98431	0.766498
161	83.25	0.83546	0.980679	0.761726
161.1	133.75	0.830154	0.977056	0.757138
161.2	86	0.825005	0.973445	0.752766
161.3	42.25	0.820004	0.969846	0.748602
161.4	31.75	0.815115	0.966264	0.744619
161.5	87	0.810324	0.9627	0.740803
161.6	34.5	0.805661	0.959157	0.73718
161.7	55.5	0.801114	0.955638	0.73374
161.8	83.75	0.796684	0.952145	0.730484
161.9	72.75	0.792393	0.94868	0.727429
162	36	0.788247	0.945246	0.72458
162.1	89.5	0.784222	0.941845	0.721918
162.2	43.75	0.780342	0.93848	0.71946
162.3	14.25	0.776597	0.935153	0.7172
162.4	40	0.772961	0.931867	0.715114
162.5	28	0.769441	0.928623	0.713207
162.6	31	0.76604	0.925424	0.711482
162.7	78.25	0.762758	0.922272	0.709938
162.8	82.75	0.759623	0.91917	0.708596
162.9	122.25	0.756652	0.916119	0.70747
163	106	0.75387	0.913122	0.706579
163.1	43.25	0.751279	0.910181	0.705924
163.2	38.25	0.748841	0.907298	0.705473
163.3	35	0.746538	0.904475	0.705208
163.4	102.5	0.744367	0.901714	0.705128
163.5	88	0.742365	0.899017	0.70526
163.6	62.5	0.740543	0.896385	0.705612
163.7	79.75	0.738885	0.893821	0.70617
163.8	31.5	0.737392	0.891327	0.706933
163.9	36.75	0.736044	0.888904	0.707882
164	44.25	0.73483	0.886553	0.709008
164.1	55	0.733756	0.884277	0.710312
164.2	49.75	0.732831	0.882078	0.711801
164.3	34.75	0.732054	0.879956	0.713472
164.4	51.75	0.731417	0.877913	0.715315
164.5	76.25	0.730923	0.875951	0.717333
164.6	48.25	0.73059	0.87407	0.719538
164.7	61.25	0.730411	0.872273	0.72192
164.8	58	0.730384	0.870561	0.724477
164.9	54.75	0.730509	0.868935	0.727208
165	112.5	0.730784	0.867395	0.730108
165.1	107	0.73124	0.865943	0.733199
165.2	99	0.731887	0.864581	0.736489
165.3	63	0.732719	0.863308	0.739969
165.4	77	0.733712	0.862126	0.743619
165.5	39.5	0.734864	0.861036	0.747433
165.6	66.5	0.736156	0.860039	0.751393
165.7	36.5	0.737591	0.859134	0.755501
165.8	73.25	0.739159	0.858324	0.759744
165.9	23.5	0.740871	0.857607	0.76413
166	50.5	0.742707	0.856986	0.768639
166.1	87.75	0.744668	0.85646	0.773269
166.2	61	0.746779	0.85603	0.778039
166.3	37.5	0.749033	0.855695	0.782941
166.4	17	0.75141	0.855457	0.787954
166.5	18.25	0.753889	0.855315	0.793059
166.6	31	0.756463	0.85527	0.798249
166.7	70.75	0.759138	0.855322	0.803524
166.8	75	0.761937	0.855469	0.808901
166.9	49.25	0.764871	0.855713	0.814387
167	76.75	0.767925	0.856054	0.819967
167.1	97	0.771104	0.85649	0.825643
167.2	71.5	0.774425	0.857022	0.831425
167.3	73.5	0.777877	0.85765	0.837301
167.4	129	0.78145	0.858372	0.843263
167.5	143.75	0.785175	0.859188	0.849331
167.6	59.75	0.78907	0.860099	0.85552
167.7	99	0.793091	0.861102	0.861789
167.8	55.25	0.797233	0.862198	0.868132
167.9	42.75	0.80148	0.863385	0.874534
168	26.5	0.80581	0.864664	0.880974
168.1	38.75	0.810208	0.866032	0.887436
168.2	58.25	0.814673	0.867489	0.893918
168.3	93.5	0.819216	0.869034	0.900427
168.4	55.5	0.823859	0.870666	0.906977
168.5	29.5	0.828586	0.872384	0.913554
168.6	40.5	0.833371	0.874186	0.920134
168.7	67.5	0.838209	0.876072	0.926709
168.8	56.5	0.843114	0.878039	0.933291
168.9	55.5	0.848084	0.880087	0.939875
169	31.25	0.853113	0.882214	0.946453
169.1	40.75	0.858184	0.884418	0.953009
169.2	60.75	0.863292	0.886699	0.959537
169.3	55.25	0.868446	0.889054	0.966044
169.4	10.25	0.873647	0.891482	0.972527
169.5	52.5	0.878864	0.893981	0.978959
169.6	51.75	0.884106	0.896549	0.985345
169.7	31	0.889379	0.899185	0.99169
169.8	35.75	0.894669	0.901886	0.997979
169.9	37.75	0.899969	0.904651	1.00421
170	43	0.905278	0.907478	1.01037
170.1	43.75	0.910597	0.910365	1.01646
170.2	59.25	0.915924	0.913309	1.02249
170.3	50.25	0.921264	0.91631	1.02845
170.4	72.25	0.926614	0.919364	1.03433
170.5	50.75	0.931978	0.922469	1.04016
170.6	139.5	0.937349	0.925624	1.0459
170.7	146.25	0.942766	0.928826	1.0516
170.8	88.5	0.948253	0.932072	1.05728
170.9	82.5	0.953776	0.935361	1.0629
171	45.75	0.959314	0.938691	1.06845
171.1	73.5	0.964839	0.942058	1.0739
171.2	37.25	0.970355	0.945461	1.07926
171.3	46.75	0.975846	0.948897	1.08451
171.4	49.25	0.981303	0.952364	1.08965
171.5	37.5	0.986727	0.955859	1.09467
171.6	70.25	0.992109	0.95938	1.09956
171.7	68.5	0.99746	0.962924	1.10434
171.8	83.25	1.00279	0.966489	1.10902
171.9	113	1.00809	0.970072	1.11358
172	85.75	1.01339	0.973671	1.11805
172.1	117.25	1.01868	0.977284	1.12242
172.2	93.75	1.02396	0.980907	1.12669
172.3	43.5	1.02922	0.984539	1.13086
172.4	49	1.03443	0.988176	1.13489
172.5	33.25	1.03957	0.991817	1.13879
172.6	19.75	1.04464	0.995457	1.14252
172.7	15.75	1.04962	0.999096	1.1461
172.8	33.5	1.05449	1.00273	1.1495
172.9	35	1.05928	1.00636	1.15274
173	38.5	1.06397	1.00998	1.15581
173.1	49.25	1.06857	1.01358	1.15872
173.2	37.75	1.07308	1.01717	1.16148
173.3	61.5	1.0775	1.02074	1.16407
173.4	44.75	1.08184	1.0243	1.1665
173.5	76.5	1.08608	1.02783	1.16878
173.6	111.25	1.09025	1.03134	1.17091
173.7	55.75	1.09436	1.03482	1.17291
173.8	36	1.09839	1.03827	1.17476
173.9	85.25	1.10232	1.04168	1.17645
174	67.5	1.10616	1.04507	1.17799
174.1	64	1.10992	1.04841	1.17938
174.2	64.5	1.11358	1.05172	1.18062
174.3	90	1.11714	1.05499	1.18171
174.4	101	1.12062	1.05821	1.18265
174.5	57	1.12403	1.06138	1.18346
174.6	67.25	1.12734	1.06451	1.18412
174.7	43	1.13055	1.06759	1.18463
174.8	75.5	1.13364	1.07061	1.18498
174.9	52	1.13663	1.07358	1.18517
175	47.5	1.1395	1.07649	1.18521
175.1	54	1.14225	1.07935	1.18509
175.2	50.5	1.14488	1.08214	1.18481
175.3	50.75	1.14738	1.08487	1.18437
175.4	94.25	1.14976	1.08753	1.18377
175.5	152.5	1.15204	1.09013	1.18304
175.6	146.5	1.15426	1.09266	1.18221
175.7	162.75	1.15644	1.09512	1.18129
175.8	96.75	1.15857	1.09751	1.18029
175.9	85.5	1.16063	1.09982	1.17919
176	42.25	1.16258	1.10206	1.17796
176.1	21	1.16441	1.10422	1.17659
176.2	55.5	1.16609	1.1063	1.17505
176.3	71	1.16763	1.1083	1.17337
176.4	94	1.16905	1.11022	1.17156
176.5	44.5	1.17036	1.11206	1.16962
176.6	42.75	1.17155	1.11382	1.16756
176.7	22.25	1.1726	1.11549	1.16536
176.8	38.75	1.17349	1.11707	1.163
176.9	34.5	1.17423	1.11857	1.1605
177	83.75	1.17483	1.11997	1.15787
177.1	79.5	1.1753	1.12129	1.15511
177.2	85.5	1.17566	1.12252	1.15226
177.3	106.75	1.17592	1.12365	1.1493
177.4	167.75	1.17608	1.1247	1.14626
177.5	115.25	1.17619	1.12565	1.14317
177.6	90	1.17623	1.12651	1.14002
177.7	90	1.17617	1.12727	1.13679
177.8	43.75	1.17602	1.12794	1.13348
177.9	60	1.17574	1.12851	1.13007
178	65.5	1.17533	1.12899	1.12656
178.1	24.25	1.1748	1.12937	1.12296
178.2	59.75	1.17412	1.12966	1.11926
178.3	44	1.17332	1.12985	1.11546
178.4	56.5	1.17238	1.12994	1.11157
178.5	59.5	1.17132	1.12994	1.10759
178.6	75.25	1.17013	1.12984	1.10354
178.7	53.5	1.16884	1.12965	1.09942
178.8	73.5	1.16743	1.12935	1.09523
178.9	86	1.16591	1.12896	1.09098
179	63	1.1643	1.12848	1.08668
179.1	56.5	1.16258	1.1279	1.08233
179.2	29.5	1.16074	1.12723	1.07792
179.3	21	1.15879	1.12646	1.07344
179.4	16.75	1.15669	1.12559	1.06889
179.5	65	1.15445	1.12464	1.06426
179.6	145	1.1521	1.12359	1.05958
179.7	137	1.14969	1.12244	1.0549
179.8	141.5	1.14725	1.12121	1.05025
179.9	148	1.14477	1.11989	1.04561
180	150.25	1.14227	1.11847	1.041
180.1	120.5	1.13975	1.11697	1.03643
180.2	91	1.13719	1.11538	1.03189
180.3	76.5	1.13457	1.11371	1.02735
180.4	105.25	1.13187	1.11195	1.02282
180.5	75.5	1.12912	1.11011	1.01829
180.6	50.75	1.12631	1.10818	1.01378
180.7	84.5	1.1234	1.10617	1.00926
180.8	88.5	1.12043	1.10408	1.00474
180.9	38	1.1174	1.10192	1.00024
181	66	1.11428	1.09968	0.995746
181.1	102	1.11109	1.09736	0.991254
181.2	74.25	1.10784	1.09497	0.986792
181.3	61.5	1.10455	1.0925	0.982359
181.4	67	1.10119	1.08997	0.977947
181.5	71.5	1.09777	1.08737	0.973557
181.6	111.25	1.09429	1.0847	0.969195
181.7	148.5	1.09078	1.08196	0.964885
181.8	66.5	1.08727	1.07917	0.960654
181.9	60.5	1.08373	1.07631	0.956476
182	73	1.08014	1.07339	0.952334
182.1	96.25	1.07651	1.07042	0.948233
182.2	42.25	1.07284	1.06739	0.94419
182.3	10.25	1.06913	1.06431	0.940188
182.4	24	1.06534	1.06118	0.936203
182.5	13.25	1.06148	1.05801	0.932237
182.6	50	1.05754	1.05478	0.92829
182.7	61.5	1.05354	1.05151	0.924379
182.8	33.5	1.04951	1.0482	0.92052
182.9	89.75	1.04543	1.04485	0.916706
183	162.75	1.04133	1.04147	0.912957
183.1	183.75	1.03726	1.03805	0.909322
183.2	87	1.03327	1.0346	0.905829
183.3	84.75	1.02931	1.03112	0.90244
183.4	85.75	1.02535	1.02761	0.899136
183.5	61.75	1.02139	1.02408	0.895917
183.6	53.75	1.01742	1.02052	0.892775
183.7	48.75	1.01344	1.01695	0.889702
183.8	113.5	1.00944	1.01335	0.886695
183.9	53.25	1.00546	1.00975	0.883786
184	114.5	1.00149	1.00613	0.880962
184.1	75	0.997543	1.0025	0.878239
184.2	81.5	0.993619	0.998867	0.875615
184.3	24	0.989714	0.995228	0.873084
184.4	16.25	0.9858	0.991587	0.870624
184.5	74.5	0.98186	0.987947	0.868219
184.6	83	0.977925	0.98431	0.865894
184.7	81.25	0.97402	0.980679	0.863668
184.8	126.25	0.970147	0.977056	0.861543
184.9	100.25	0.966333	0.973445	0.85954
185	107	0.96258	0.969846	0.857657
185.1	131.25	0.958884	0.966264	0.855894
185.2	84.5	0.955264	0.9627	0.854262
185.3	90.75	0.951703	0.959157	0.852747
185.4	113.75	0.948193	0.955638	0.851341
185.5	104.25	0.94475	0.952145	0.850056
185.6	37	0.941378	0.94868	0.848894
185.7	44.25	0.938039	0.945246	0.847821
185.8	65.75	0.934721	0.941845	0.846827
185.9	39	0.931438	0.93848	0.845922
186	53	0.928185	0.935153	0.845099
186.1	9	0.924963	0.931867	0.844358
186.2	18.25	0.921755	0.928623	0.843683
186.3	13	0.918555	0.925424	0.843068
186.4	8	0.915364	0.922272	0.842511
186.5	10.75	0.912181	0.91917	0.84201
186.6	10.75	0.909008	0.916119	0.841564
186.7	30	0.905847	0.913122	0.841174
186.8	92.5	0.902711	0.910181	0.840848
186.9	112.5	0.899642	0.907298	0.840618
187	95	0.896668	0.904475	0.840508
187.1	106.75	0.893789	0.901714	0.840512
187.2	75.5	0.891006	0.899017	0.840633
187.3	136.75	0.888307	0.896385	0.840857
187.4	171.75	0.88572	0.893821	0.841205
187.5	180.5	0.88328	0.891327	0.841705
187.6	72	0.881003	0.888904	0.842368
187.7	52	0.878834	0.886553	0.843146
187.8	41.75	0.876732	0.884277	0.844004
187.9	43.75	0.874687	0.882078	0.844932
188	72.75	0.872698	0.879956	0.845926
188.1	56.5	0.870784	0.877913	0.847
188.2	32.5	0.868943	0.875951	0.848151
188.3	27.5	0.86716	0.87407	0.849363
188.4	65	0.865426	0.872273	0.850628
188.5	111.5	0.86376	0.870561	0.851959
188.6	105.25	0.862201	0.868935	0.853385
188.7	79.5	0.860757	0.867395	0.854912
188.8	119	0.859413	0.865943	0.856525
188.9	103	0.858184	0.864581	0.858235
189	102.5	0.857074	0.863308	0.860042
189.1	83.25	0.856076	0.862126	0.86194
189.2	51.25	0.855182	0.861036	0.863919
189.3	23.25	0.854367	0.860039	0.865957
189.4	92.5	0.853609	0.859134	0.868033
189.5	85.25	0.852938	0.858324	0.87017
189.6	92	0.852368	0.857607	0.872379
189.7	60.5	0.851903	0.856986	0.874659
189.8	71	0.851525	0.85646	0.876996
189.9	107.25	0.851233	0.85603	0.879384
190	131.75	0.851049	0.855695	0.881842
190.1	57	0.850996	0.855457	0.884385
190.2	14.25	0.851039	0.855315	0.886984
190.3	7.75	0.851133	0.85527	0.889601
190.4	13.5	0.851265	0.855322	0.89222
190.5	58.5	0.851433	0.855469	0.89484
190.6	101.5	0.851665	0.855713	0.897482
190.7	130	0.851997	0.856054	0.900173
190.8	110	0.852454	0.85649	0.902933
190.9	80.25	0.853034	0.857022	0.905758
191	100	0.853713	0.85765	0.908628
191.1	82.5	0.854493	0.858372	0.911543
191.2	78.5	0.85537	0.859188	0.914496
191.3	79.25	0.856335	0.860099	0.917481
191.4	103.25	0.857387	0.861102	0.920494
191.5	111.25	0.858539	0.862198	0.923544
191.6	19.5	0.8598	0.863385	0.926638
191.7	20	0.86112	0.864664	0.929734
191.8	18	0.862474	0.866032	0.932809
191.9	56.75	0.86386	0.867489	0.93586
192	55.75	0.865298	0.869034	0.938903
192.1	20.75	0.866796	0.870666	0.941944
192.2	22.75	0.868335	0.872384	0.944964
192.3	21.25	0.869903	0.874186	0.947955
192.4	36.5	0.871501	0.876072	0.950914
192.5	51.25	0.873135	0.878039	0.953846
192.6	9	0.874815	0.880087	0.956759
192.7	58.25	0.876522	0.882214	0.959636
192.8	110.75	0.87827	0.884418	0.962488
192.9	93.5	0.8801	0.886699	0.965348
193	91.5	0.882016	0.889054	0.968218
193.1	106.5	0.88401	0.891482	0.971091
193.2	95.25	0.886088	0.893981	0.973973
193.3	40.25	0.888247	0.896549	0.976859
193.4	82.25	0.890451	0.899185	0.979721
193.5	82.75	0.892708	0.901886	0.982564
193.6	115	0.895027	0.904651	0.985394
193.7	46.75	0.897424	0.907478	0.988226
193.8	53.75	0.89987	0.910365	0.991035
193.9	53	0.902347	0.913309	0.993805
194	62.75	0.904855	0.91631	0.996538
194.1	48.75	0.907398	0.919364	0.999235
194.2	87.25	0.909969	0.922469	1.00189
194.3	57.75	0.912584	0.925624	1.00452
194.4	58.25	0.915235	0.928826	1.00711
194.5	79	0.917913	0.932072	1.00967
194.6	87.5	0.920627	0.935361	1.01219
194.7	21.5	0.923386	0.938691	1.01468
194.8	73.25	0.926153	0.942058	1.01712
194.9	129.25	0.928939	0.945461	1.01951
195	66.25	0.931785	0.948897	1.02188
195.1	50.75	0.934671	0.952364	1.02423
195.2	75.5	0.937569	0.955859	1.02652
195.3	90	0.940486	0.95938	1.02877
195.4	76.25	0.943435	0.962924	1.03099
195.5	81.75	0.94641	0.966489	1.03317
195.6	61.25	0.949409	0.970072	1.03531
195.7	32	0.952421	0.973671	1.0374
195.8	35.5	0.955421	0.977284	1.03942
195.9	37.25	0.958401	0.980907	1.04137
196	34.5	0.961363	0.984539	1.04325
196.1	19.75	0.964302	0.988176	1.04505
196.2	8.5	0.967208	0.991817	1.04677
196.3	16.5	0.970069	0.995457	1.0484
196.4	6.25	0.972886	0.999096	1.04994
196.5	14	0.975652	1.00273	1.05139
196.6	65.25	0.978368	1.00636	1.05274
196.7	112.25	0.981063	1.00998	1.05403
196.8	101	0.983774	1.01358	1.05528
196.9	89	0.986508	1.01717	1.0565
197	133	0.989251	1.02074	1.05769
197.1	90.25	0.992024	1.0243	1.05885
197.2	50.5	0.994814	1.02783	1.05998
197.3	49.75	0.997584	1.03134	1.06106
197.4	84.25	1.00032	1.03482	1.06206
197.5	91.25	1.00304	1.03827	1.06302
197.6	95.75	1.00576	1.04168	1.06393
197.7	96.5	1.00848	1.04507	1.0648
197.8	89.25	1.0112	1.04841	1.06564
197.9	51.5	1.01391	1.05172	1.06644
198	69.25	1.01659	1.05499	1.06718
198.1	42.75	1.01924	1.05821	1.06786
198.2	59.75	1.02185	1.06138	1.06847
198.3	82.5	1.02441	1.06451	1.06902
198.4	94	1.02694	1.06759	1.06952
198.5	67.75	1.02946	1.07061	1.06998
198.6	74.75	1.03194	1.07358	1.07038
198.7	116.25	1.0344	1.07649	1.07074
198.8	62.25	1.03684	1.07935	1.07107
198.9	61	1.03925	1.08214	1.07135
199	66.5	1.04161	1.08487	1.07157
199.1	57.75	1.04393	1.08753	1.07174
199.2	33.75	1.0462	1.09013	1.07185
199.3	20.75	1.04839	1.09266	1.07189
199.4	53.25	1.05051	1.09512	1.07185
199.5	76.75	1.05256	1.09751	1.07174
199.6	81	1.05455	1.09982	1.07158
199.7	102.75	1.05651	1.10206	1.07138
199.8	103.5	1.05844	1.10422	1.07114
199.9	95.25	1.06034	1.1063	1.07089
200	58.25	1.06222	1.1083	1.0706
200.1	70.5	1.06404	1.11022	1.07027
200.2	83	1.06581	1.11206	1.06989
200.3	53.75	1.06753	1.11382	1.06947
200.4	80	1.06919	1.11549	1.069
200.5	77.75	1.07079	1.11707	1.06848
200.6	66	1.07234	1.11857	1.06793
200.7	85.5	1.07383	1.11997	1.06734
200.8	70.5	1.07527	1.12129	1.06671
200.9	65.5	1.07666	1.12252	1.06605
201	51.75	1.07798	1.12365	1.06534
201.1	99.25	1.07923	1.1247	1.06458
201.2	80.5	1.08044	1.12565	1.0638
201.3	119.5	1.08159	1.12651	1.06298
201.4	89.25	1.08271	1.12727	1.06216
201.5	135.5	1.08379	1.12794	1.06132
201.6	91.5	1.08485	1.12851	1.06047
201.7	63.5	1.08587	1.12899	1.05962
201.8	67.25	1.08683	1.12937	1.05873
201.9	86.5	1.08773	1.12966	1.0578
202	118	1.08856	1.12985	1.05685
202.1	81.25	1.08936	1.12994	1.0559
202.2	92.25	1.09011	1.12994	1.05492
202.3	75.25	1.09082	1.12984	1.05393
202.4	58.75	1.09146	1.12965	1.05292
202.5	80.75	1.09203	1.12935	1.05187
202.6	113	1.09254	1.12896	1.05079
202.7	93	1.09301	1.12848	1.04971
202.8	38.5	1.09344	1.1279	1.04862
202.9	111.75	1.09378	1.12723	1.0475
203	112.75	1.09408	1.12646	1.04636
203.1	128.75	1.09434	1.12559	1.04522
203.2	78	1.09457	1.12464	1.0441
203.3	73.25	1.09476	1.12359	1.04296
203.4	108.25	1.09489	1.12244	1.04181
203.5	137.25	1.09497	1.12121	1.04065
203.6	129.75	1.09503	1.11989	1.03951
203.7	52	1.09508	1.11847	1.03839
203.8	52	1.09507	1.11697	1.03725
203.9	59.75	1.09497	1.11538	1.03608
204	66.5	1.0948	1.11371	1.03488
204.1	23.5	1.09455	1.11195	1.03365
204.2	44	1.09421	1.11011	1.03239
204.3	64	1.09378	1.10818	1.03108
204.4	26.75	1.09328	1.10617	1.02974
204.5	29.75	1.09269	1.10408	1.02837
204.6	60.25	1.092	1.10192	1.02695
204.7	54.5	1.09123	1.09968	1.0255
204.8	80.75	1.09038	1.09736	1.02403
204.9	161	1.08948	1.09497	1.02254
205	114.25	1.08857	1.0925	1.02109
205.1	115.75	1.08765	1.08997	1.01965
205.2	116.75	1.08671	1.08737	1.01824
205.3	110.25	1.08575	1.0847	1.01685
205.4	89.75	1.08476	1.08196	1.01547
205.5	44.5	1.08374	1.07917	1.0141
205.6	32	1.08266	1.07631	1.0127
205.7	39.75	1.08149	1.07339	1.01128
205.8	69	1.08024	1.07042	1.00982
205.9	38.5	1.07893	1.06739	1.00835
206	59.25	1.07755	1.06431	1.00685
206.1	71.25	1.07611	1.06118	1.00533
206.2	101.25	1.07461	1.05801	1.0038
206.3	115	1.07308	1.05478	1.00228
206.4	86.25	1.07153	1.05151	1.00077
206.5	84.5	1.06996	1.0482	0.99928
206.6	65.5	1.06836	1.04485	0.997792
206.7	93.75	1.06672	1.04147	0.9963
206.8	90.75	1.06504	1.03805	0.994812
206.9	48	1.06334	1.0346	0.993333
207	13.75	1.06159	1.03112	0.991845
207.1	38.25	1.05976	1.02761	0.990323
207.2	52.25	1.05787	1.02408	0.98877
207.3	77.75	1.05592	1.02052	0.987199
207.4	90.5	1.05393	1.01695	0.985626
207.5	86.75	1.05192	1.01335	0.984061
207.6	66.75	1.0499	1.00975	0.982508
207.7	74	1.04784	1.00613	0.980956
207.8	131.5	1.04576	1.0025	0.979405
207.9	130	1.04368	0.998867	0.977883
208	103.25	1.04163	0.995228	0.976403
208.1	40.75	1.03958	0.991587	0.974953
208.2	54.25	1.0375	0.987947	0.973499
208.3	26.75	1.03539	0.98431	0.972033
208.4	60	1.03322	0.980679	0.970547
208.5	39.5	1.03101	0.977056	0.969049
208.6	42	1.02877	0.973445	0.967538
208.7	71	1.02649	0.969846	0.966012
208.8	64	1.02418	0.966264	0.964485
208.9	28	1.02185	0.9627	0.96296
209	65.5	1.01949	0.959157	0.961421
209.1	56.5	1.01711	0.955638	0.959877
209.2	19.5	1.0147	0.952145	0.958332
209.3	13.75	1.01226	0.94868	0.956769
209.4	34.25	1.00976	0.945246	0.955177
209.5	67	1.00722	0.941845	0.953565
209.6	92.5	1.00468	0.93848	0.951953
209.7	68.75	1.00214	0.935153	0.950361
209.8	109.75	0.999604	0.931867	0.948785
209.9	147.5	0.997095	0.928623	0.947238
210	148	0.994643	0.925424	0.945747
210.1	115.75	0.992259	0.922272	0.944322
210.2	72.75	0.989929	0.91917	0.942949
210.3	49.75	0.98762	0.916119	0.941601
210.4	49.5	0.985309	0.913122	0.940259
210.5	79.25	0.982992	0.910181	0.938918
210.6	32.75	0.980686	0.907298	0.937592
210.7	53.25	0.978375	0.904475	0.936267
210.8	63.75	0.976059	0.901714	0.934943
210.9	58.25	0.973751	0.899017	0.933629
211	85.75	0.971452	0.896385	0.932326
211.1	116.25	0.969178	0.893821	0.931047
211.2	71.25	0.966954	0.891327	0.929811
211.3	113.75	0.964765	0.888904	0.928606
211.4	127	0.962622	0.886553	0.927441
211.5	114.5	0.960547	0.884277	0.926333
211.6	121	0.958537	0.882078	0.925279
211.7	158.25	0.956593	0.879956	0.92428
211.8	99.75	0.954739	0.877913	0.923354
211.9	102.25	0.952952	0.875951	0.922485
[truncated: 281 more rows]

## Sheet: C
Time	Activity	Model 1 (Fwake)	Model 2 (Fperi)	Model 3 (Fwake + Fperi))			Time[hrs]	Bioluminescence
0.1	87	1.09	1.2001	1.16005			0.5	1.04993
0.2	86.5	1.08715	1.19261	1.1518			1	1.07195
0.3	38.6667	1.08428	1.18498	1.14344			1.5	1.10113
0.4	60.5	1.08138	1.17721	1.13495			2	1.03028
0.5	28	1.07843	1.16931	1.12633			2.5	0.939583
0.6	51.5	1.07544	1.16129	1.11759			3	0.944761
0.7	59.3333	1.0724	1.15314	1.10872			3.5	0.890673
0.8	69.1667	1.06934	1.14488	1.09974			4	0.851504
0.9	86.8333	1.06626	1.13651	1.09068			4.5	0.84059
1	81.1667	1.06317	1.12804	1.08153			5	0.734174
1.1	67.6667	1.06007	1.11947	1.07232			5.5	0.664478
1.2	70.3333	1.05697	1.11081	1.06305			6	0.604853
1.3	84.5	1.05386	1.10206	1.05371			6.5	0.584919
1.4	73.1667	1.05076	1.09324	1.04432			7	0.593207
1.5	68	1.04766	1.08434	1.03488			7.5	0.548932
1.6	83.5	1.04455	1.07537	1.02541			8	0.556502
1.7	36.3333	1.04146	1.06635	1.0159			8.5	0.554568
1.8	20.5	1.03836	1.05727	1.00636			9	0.595338
1.9	69	1.03524	1.04815	0.996762			9.5	0.583338
2	49.8333	1.03212	1.03898	0.987139			10	0.570338
2.1	36	1.029	1.02978	0.977499			10.5	0.622068
2.2	57.1667	1.02588	1.02055	0.96784			11	0.727422
2.3	71.6667	1.02276	1.01129	0.958173			11.5	0.671006
2.4	36	1.01967	1.00202	0.948518			12	0.78305
2.5	61.6667	1.01658	0.992747	0.93887			12.5	0.83252
2.6	89.5	1.01351	0.983467	0.929237			13	0.864269
2.7	82	1.01047	0.974191	0.919646			13.5	0.884959
2.8	47.5	1.00748	0.964925	0.910107			14	0.915466
2.9	15.6667	1.00451	0.955675	0.900609			14.5	0.91699
3	12.3333	1.00154	0.946449	0.891137			15	0.977201
3.1	35.5	0.998583	0.937252	0.881688			15.5	1.05196
3.2	93.3333	0.995634	0.928091	0.872281			16	1.13108
3.3	106	0.992732	0.918973	0.862952			16.5	1.25482
3.4	146	0.989897	0.909903	0.853727			17	1.21453
3.5	135	0.987153	0.900887	0.844635			17.5	1.33179
3.6	72	0.984507	0.891933	0.835685			18	1.32644
3.7	22.3333	0.981928	0.883046	0.826853			18.5	1.44894
3.8	26.5	0.979383	0.874233	0.818108			19	1.35414
3.9	24.1667	0.976864	0.865499	0.809448			19.5	1.201
4	38.1667	0.974372	0.856851	0.800878			20	1.46243
4.1	20.8333	0.971917	0.848294	0.79241			20.5	1.32496
4.2	17.3333	0.969495	0.839835	0.784047			21	1.33967
4.3	7	0.967102	0.831479	0.775787			21.5	1.32956
4.4	31.3333	0.964735	0.823233	0.767632			22	1.33485
4.5	59.3333	0.962405	0.815101	0.759597			22.5	1.22682
4.6	78.1667	0.960132	0.807089	0.751705			23	1.22951
4.7	166.833	0.957932	0.799204	0.743977			23.5	1.07956
4.8	103.5	0.955852	0.79145	0.736462			24	1.08878
4.9	106.167	0.953884	0.783832	0.729159			24.5	1.14575
5	105.667	0.952017	0.776357	0.722057			25	1.07171
5.1	68.8333	0.950253	0.769028	0.715163			25.5	1.14866
5.2	25.6667	0.948575	0.761852	0.708465			26	1.02975
5.3	44.1667	0.946958	0.754833	0.70194			26.5	0.991505
5.4	30.3333	0.945402	0.747976	0.69559			27	0.969931
5.5	31	0.943905	0.741285	0.689419			27.5	1.01435
5.6	13	0.942465	0.734766	0.683427			28	0.835117
5.7	15.5	0.941077	0.728422	0.677611			28.5	0.884964
5.8	17.5	0.939737	0.722258	0.671973			29	0.768767
5.9	19	0.938448	0.716279	0.666516			29.5	0.73909
6	57.5	0.937214	0.710488	0.661248			30	0.648796
6.1	58.3333	0.936051	0.704889	0.656188			30.5	0.614468
6.2	52	0.934971	0.699486	0.65135			31	0.70132
6.3	47.8333	0.933971	0.694283	0.646735			31.5	0.652998
6.4	79.5	0.933049	0.689284	0.642341			32	0.640521
6.5	53.5	0.932219	0.684491	0.638187			32.5	0.706158
6.6	74.1667	0.931476	0.679908	0.634269			33	0.66022
6.7	73.3333	0.930825	0.675539	0.630595			33.5	0.696908
6.8	67.6667	0.93027	0.671385	0.62717			34	0.689082
6.9	66	0.92981	0.667451	0.623995			34.5	0.690276
7	29.3333	0.929441	0.663738	0.621069			35	0.75394
7.1	28.3333	0.929148	0.660249	0.618377			35.5	0.735731
7.2	36.1667	0.928921	0.656986	0.615913			36	0.839793
7.3	16.8333	0.928765	0.653953	0.613682			36.5	0.737971
7.4	38.5	0.928671	0.651149	0.611677			37	0.832949
7.5	34	0.928646	0.648579	0.609907			37.5	0.877955
7.6	19.8333	0.928692	0.646242	0.608373			38	0.970707
7.7	33.3333	0.928802	0.644142	0.607071			38.5	0.982569
7.8	23.1667	0.928979	0.642278	0.606004			39	1.03396
7.9	18	0.92922	0.640653	0.605171			39.5	1.09823
8	28.5	0.929521	0.639268	0.604568			40	1.1179
8.1	38	0.929884	0.638123	0.604199			40.5	1.20878
8.2	47.6667	0.930317	0.637219	0.60407			41	1.20688
8.3	53	0.930825	0.636556	0.604188			41.5	1.23398
8.4	31	0.931413	0.636135	0.604558			42	1.38588
8.5	54.3333	0.93207	0.635957	0.60517			42.5	1.3292
8.6	63	0.932802	0.636021	0.606029			43	1.3436
8.7	67.6667	0.933618	0.636327	0.607144			43.5	1.41547
8.8	93.6667	0.934521	0.636875	0.608518			44	1.40472
8.9	60.6667	0.935522	0.637665	0.610163			44.5	1.35172
9	56	0.936611	0.638695	0.612067			45	1.39454
9.1	25.1667	0.937779	0.639965	0.614221			45.5	1.33278
9.2	20.3333	0.939008	0.641474	0.616606			46	1.22171
9.3	11	0.940289	0.643222	0.619213			46.5	1.23896
9.4	33.3333	0.941615	0.645205	0.622033			47	1.33929
9.5	34	0.942993	0.647425	0.625073			47.5	1.23776
9.6	23.1667	0.944427	0.649877	0.628336			48	1.23983
9.7	22.5	0.945911	0.652562	0.631815			50.5	0.754886
9.8	27.3333	0.947441	0.655476	0.635503			51	0.697481
9.9	19.8333	0.949017	0.658618	0.639401			51.5	0.704462
10	20.1667	0.950637	0.661986	0.643503			52	0.723635
10.1	22.5	0.952296	0.665577	0.647804			54.5	0.582082
10.2	44.3333	0.953995	0.669389	0.652303			55	0.559072
10.3	67.6667	0.955743	0.673418	0.657006			55.5	0.604801
10.4	64	0.957554	0.677663	0.661926			56	0.650089
10.5	100.333	0.959429	0.68212	0.667062			58.5	0.783838
10.6	65.8333	0.961382	0.686785	0.672427			59	0.806547
10.7	69	0.963406	0.691656	0.678009			59.5	0.901252
10.8	41.3333	0.96549	0.69673	0.683797			60	1.14404
10.9	38.8333	0.967622	0.702002	0.689775			62.5	1.00908
11	80.1667	0.969793	0.707469	0.695931			63	0.992715
11.1	48.6667	0.972018	0.713126	0.70228			63.5	1.11429
11.2	120	0.974292	0.718971	0.70881			64	1.14026
11.3	93.3333	0.976636	0.724999	0.715544			66.5	1.19083
11.4	115.833	0.979054	0.731206	0.722479			67	1.10237
11.5	50.1667	0.981547	0.737587	0.729615			67.5	1.35961
11.6	80	0.984088	0.744138	0.736922			68	1.35859
11.7	51	0.986674	0.750854	0.744392			70.5	1.23847
11.8	37	0.989296	0.757731	0.752015			71	1.16235
11.9	88.5	0.99194	0.764764	0.759772			71.5	1.22676
12	117.5	0.994622	0.771948	0.767676			72	1.17711
12.1	110.833	0.997366	0.779277	0.775748			74.5	0.896262
12.2	67.5	1.00017	0.786748	0.783984			75	0.767983
12.3	61.8333	1.00302	0.794353	0.792357			75.5	0.735036
12.4	108.667	1.00589	0.80209	0.800849			76	0.753354
12.5	106.5	1.0088	0.809951	0.809474			78.5	0.573912
12.6	66.3333	1.01176	0.817931	0.818235			79	0.546642
12.7	84.3333	1.01475	0.826025	0.827106			79.5	0.580121
12.8	104.667	1.01776	0.834227	0.83608			80	0.603061
12.9	167	1.02081	0.842532	0.845164			82.5	0.757385
13	98.3333	1.02392	0.850934	0.854384			83	0.79143
13.1	124.333	1.02708	0.859426	0.863716			83.5	0.905524
13.2	98.8333	1.03028	0.868003	0.87315			84	1.06495
13.3	90.5	1.03351	0.876659	0.882673			86.5	0.994304
13.4	143.833	1.03676	0.885389	0.892268			87	1.031
13.5	131.333	1.04004	0.894185	0.90195			87.5	1.13187
13.6	89.8333	1.04337	0.903041	0.91172			88	1.16273
13.7	91.6667	1.04672	0.911953	0.921547			90.5	1.31747
13.8	69.3333	1.05007	0.920913	0.931416			91	1.28471
13.9	67	1.05341	0.929915	0.941311			91.5	1.42682
14	41	1.05674	0.938953	0.951217			92	1.34449
14.1	83.6667	1.06004	0.94802	0.961116			94.5	1.17618
14.2	69.6667	1.06331	0.957111	0.971013			95	1.14672
14.3	107.833	1.06657	0.966219	0.980905			95.5	1.16179
14.4	109.667	1.06982	0.975338	0.990799			96	1.10417
14.5	84	1.07307	0.984462	1.0007			98.5	1.01247
14.6	114.5	1.07631	0.993583	1.01058			99	0.966608
14.7	117.167	1.07954	1.0027	1.02045			99.5	0.876024
14.8	137.5	1.08276	1.0118	1.0303			100	0.836699
14.9	134.5	1.08598	1.02087	1.04015			100.5	0.813732
15	48.6667	1.08921	1.02992	1.04998			101	0.767018
15.1	42.6667	1.0924	1.03894	1.05975			101.5	0.699684
15.2	98.1667	1.09553	1.04792	1.06943			102	0.69144
15.3	101.833	1.09861	1.05685	1.07904			102.5	0.653071
15.4	60.6667	1.10167	1.06573	1.08858			103	0.622045
15.5	72	1.10467	1.07456	1.09803			103.5	0.602828
15.6	105.333	1.10762	1.08331	1.10737			104	0.589721
15.7	120.833	1.11052	1.092	1.11663			104.5	0.623188
15.8	154	1.1134	1.10061	1.1258			105	0.603349
15.9	125.333	1.11626	1.10914	1.1349			105.5	0.713209
16	110.667	1.1191	1.11758	1.14392			106	0.720325
16.1	113.5	1.12191	1.12593	1.15283			106.5	0.688707
16.2	84	1.12467	1.13418	1.16163			107	0.780771
16.3	62.6667	1.12738	1.14232	1.1703			107.5	0.776312
16.4	77	1.13001	1.15035	1.17882			108	0.790838
16.5	70.5	1.13257	1.15827	1.18718			108.5	0.880672
16.6	68.1667	1.13505	1.16606	1.19538			109	0.930171
16.7	33	1.13745	1.17372	1.2034			109.5	0.927179
16.8	78.8333	1.13975	1.18126	1.21123			110	1.10985
16.9	70.5	1.14196	1.18865	1.21887			110.5	1.01992
17	69	1.14409	1.1959	1.22632			111	1.13962
17.1	91.5	1.14613	1.20301	1.23359			111.5	1.15005
17.2	67.8333	1.14809	1.20996	1.24066			112	1.26329
17.3	89.1667	1.14996	1.21675	1.24753			112.5	1.22571
17.4	74.8333	1.15175	1.22338	1.2542			113	1.33981
17.5	71	1.15346	1.22985	1.26067			113.5	1.33968
17.6	26	1.15507	1.23614	1.26692			114	1.32625
17.7	34	1.15657	1.24226	1.27292			114.5	1.26476
17.8	81.3333	1.15794	1.2482	1.27867			115	1.45068
17.9	90.1667	1.15921	1.25395	1.28419			115.5	1.30706
18	154.5	1.1604	1.25952	1.28949			116	1.36829
18.1	95.5	1.16153	1.26489	1.29459			116.5	1.3545
18.2	88.3333	1.16259	1.27007	1.29948			117	1.41893
18.3	112.167	1.16356	1.27505	1.30414			117.5	1.32419
18.4	92.6667	1.16445	1.27983	1.30857			118	1.38423
18.5	84.5	1.16526	1.2844	1.31277			118.5	1.2719
18.6	100.833	1.16598	1.28876	1.31673			119	1.36578
18.7	85.8333	1.16662	1.29291	1.32045			119.5	1.22638
18.8	133	1.16716	1.29685	1.32392			120	1.17039
18.9	105.5	1.16764	1.30057	1.32716			120.5	1.24769
19	91	1.16804	1.30407	1.33017			121	1.09718
19.1	73.8333	1.16835	1.30735	1.33293			121.5	1.18149
19.2	45.8333	1.16856	1.3104	1.33543			122	1.05011
19.3	117.833	1.16866	1.31323	1.33764			122.5	0.985064
19.4	166.5	1.16867	1.31583	1.3396			123	0.934721
19.5	85.5	1.16863	1.3182	1.34135			123.5	0.837401
19.6	68.3333	1.16852	1.32034	1.34284			124	0.781324
19.7	102	1.1683	1.32224	1.34407			124.5	0.778059
19.8	47.3333	1.168	1.32391	1.34503			125	0.716123
19.9	52.1667	1.16759	1.32534	1.34571			125.5	0.652333
20	46	1.16706	1.32654	1.34611			126	0.622337
20.1	55.3333	1.16641	1.3275	1.34621			126.5	0.656236
20.2	83.3333	1.16565	1.32822	1.34602			127	0.623003
20.3	59.5	1.1648	1.32871	1.34556			127.5	0.627701
20.4	81.3333	1.16384	1.32895	1.34483			128	0.642038
20.5	58.5	1.16278	1.32896	1.34382			128.5	0.641759
20.6	121.667	1.16163	1.32872	1.34253			129	0.655879
20.7	163.5	1.1604	1.32825	1.34099			129.5	0.732624
20.8	110.5	1.15912	1.32754	1.33923			130	0.698562
20.9	123.667	1.1578	1.3266	1.33725			130.5	0.717371
21	139.833	1.15641	1.32541	1.33502			131	0.757876
21.1	124.333	1.15497	1.32399	1.33258			131.5	0.809814
21.2	155.667	1.15349	1.32233	1.32991			132	0.849952
21.3	152.667	1.15196	1.32044	1.32702			132.5	0.892591
21.4	84.5	1.15041	1.31832	1.32394			133	0.962855
21.5	74.1667	1.14879	1.31597	1.32062			133.5	0.938516
21.6	155.833	1.14709	1.31339	1.31705			134	1.02935
21.7	129.5	1.14535	1.31057	1.31326			134.5	0.976881
21.8	166.833	1.14357	1.30754	1.30927			135	1.12524
21.9	134.167	1.14177	1.30428	1.3051			135.5	1.15279
22	89.3333	1.13994	1.3008	1.30072			136	1.18635
22.1	75.5	1.13806	1.2971	1.29613			136.5	1.18986
22.2	76.8333	1.13611	1.29318	1.29131			137	1.25331
22.3	114.667	1.13408	1.28905	1.28626			137.5	1.33623
22.4	106.833	1.13201	1.28471	1.28101			138	1.26503
22.5	126.167	1.12989	1.28016	1.27555			138.5	1.29392
22.6	123.5	1.12774	1.27541	1.2699			139	1.2476
22.7	82	1.12555	1.27045	1.26407			139.5	1.36709
22.8	60.6667	1.12332	1.2653	1.25805			140	1.21832
22.9	77.3333	1.12103	1.25996	1.25181			140.5	1.29327
23	95.5	1.11867	1.25442	1.24537			141	1.33883
23.1	97	1.11627	1.2487	1.23875			141.5	1.23653
23.2	96.1667	1.11383	1.24279	1.23195			142	1.21444
23.3	137.833	1.11135	1.23671	1.22497			142.5	1.21876
23.4	141.167	1.10886	1.23045	1.21785			143	1.15841
23.5	120.5	1.10636	1.22402	1.2106			143.5	1.15764
23.6	72.3333	1.10385	1.21743	1.20321			144	1.1745
23.7	68.5	1.10131	1.21067	1.19566
23.8	83.3333	1.09872	1.20376	1.18795
23.9	76.5	1.0961	1.1967	1.18009
24	83.6667	1.09344	1.18949	1.17208
24.1	80.5	1.09076	1.18215	1.16394
24.2	45	1.08804	1.17466	1.15566
24.3	14	1.08528	1.16704	1.14724
24.4	25.1667	1.08246	1.1593	1.13866
24.5	24.3333	1.07958	1.15144	1.12992
24.6	35.6667	1.07664	1.14346	1.12105
24.7	30.1667	1.07366	1.13537	1.11203
24.8	58.3333	1.07062	1.12718	1.10289
24.9	27.1667	1.06755	1.11889	1.09364
25	91	1.06445	1.11051	1.08428
25.1	38.8333	1.06133	1.10204	1.07484
25.2	60.6667	1.05819	1.09349	1.06531
25.3	120.333	1.05504	1.08486	1.05571
25.4	101	1.05189	1.07617	1.04606
25.5	109	1.04877	1.06741	1.03639
25.6	71.1667	1.04568	1.0586	1.0267
25.7	88	1.0426	1.04974	1.01698
25.8	81.1667	1.03953	1.04083	1.00723
25.9	55.1667	1.03648	1.03188	0.997473
26	36.5	1.03343	1.0229	0.987691
26.1	53.3333	1.03038	1.0139	0.977879
26.2	38	1.02732	1.00487	0.968049
26.3	15.3333	1.02427	0.995832	0.958204
26.4	65.3333	1.0212	0.986786	0.948339
26.5	44.6667	1.01815	0.977739	0.938477
26.6	52	1.0151	0.968697	0.928629
26.7	47.5	1.01207	0.959667	0.918799
26.8	53.6667	1.00905	0.950654	0.908995
26.9	23.1667	1.00606	0.941666	0.899226
27	61.1667	1.00308	0.932708	0.889486
27.1	85	1.00011	0.923786	0.879793
27.2	71.1667	0.997197	0.914906	0.870174
27.3	50.1667	0.994326	0.906076	0.860633
27.4	36.6667	0.991491	0.8973	0.851167
27.5	45	0.988684	0.888585	0.84177
27.6	49.6667	0.985907	0.879937	0.83245
27.7	33.5	0.983167	0.871361	0.823219
27.8	17	0.980459	0.862865	0.814076
27.9	31	0.977775	0.854453	0.805017
28	55.1667	0.97512	0.846132	0.796052
28.1	125.833	0.972509	0.837907	0.7872
28.2	77	0.969982	0.829784	0.778507
28.3	69	0.967536	0.821769	0.769971
28.4	67.5	0.965157	0.813866	0.761585
28.5	72.3333	0.962844	0.806082	0.753352
28.6	41.1667	0.960603	0.798423	0.74528
28.7	87.6667	0.95842	0.790892	0.737362
28.8	73	0.956312	0.783496	0.729617
28.9	65.5	0.954285	0.776239	0.722056
29	102.833	0.952333	0.769127	0.714675
29.1	86.1667	0.950472	0.762165	0.707497
29.2	42.5	0.948706	0.755356	0.700528
29.3	40.3333	0.947013	0.748707	0.693747
29.4	69	0.945381	0.742222	0.687151
29.5	18.3333	0.943826	0.735904	0.680755
29.6	15.8333	0.942331	0.729759	0.674548
29.7	16.1667	0.940886	0.723791	0.668522
29.8	15.8333	0.939491	0.718003	0.66268
29.9	21.1667	0.938148	0.712401	0.657028
30	20.5	0.936858	0.706987	0.651571
30.1	41.3333	0.935626	0.701765	0.646314
30.2	68	0.934459	0.69674	0.64127
30.3	75.6667	0.933377	0.691914	0.63646
30.4	88.8333	0.93239	0.687291	0.631896
30.5	120.667	0.931505	0.682874	0.62759
30.6	59.1667	0.930742	0.678666	0.623562
30.7	37.8333	0.930079	0.67467	0.619794
30.8	30.6667	0.929494	0.670889	0.616265
30.9	13.8333	0.928979	0.667326	0.61297
31	6.5	0.928524	0.663982	0.609901
31.1	13.6667	0.928124	0.660861	0.607054
31.2	23.5	0.927779	0.657964	0.604432
31.3	45	0.927496	0.655293	0.602044
31.4	23	0.927288	0.652851	0.599902
31.5	19.6667	0.927149	0.650638	0.598003
31.6	49.3333	0.927072	0.648657	0.596343
31.7	41	0.927071	0.646908	0.594934
31.8	61.1667	0.927148	0.645394	0.593781
31.9	45.5	0.927311	0.644115	0.592892
32	37.1667	0.927555	0.643071	0.592264
32.1	25.5	0.927875	0.642265	0.591892
32.2	16.6667	0.928262	0.641695	0.591767
32.3	19.6667	0.928709	0.641364	0.591883
32.4	23.1667	0.929215	0.64127	0.59224
32.5	74.1667	0.929782	0.641414	0.59284
32.6	87	0.930433	0.641796	0.593705
32.7	78	0.931185	0.642415	0.594852
32.8	93.6667	0.932036	0.643272	0.59628
32.9	84.5	0.93299	0.644365	0.597993
33	52.1667	0.934045	0.645694	0.599987
33.1	50.8333	0.935184	0.647258	0.602245
33.2	32.3333	0.936399	0.649056	0.604758
33.3	25.1667	0.937678	0.651087	0.607514
33.4	53.3333	0.939013	0.653348	0.610504
33.5	43.8333	0.940415	0.65584	0.613737
33.6	24.1667	0.941884	0.658559	0.617213
33.7	55.5	0.943408	0.661504	0.620918
33.8	73.3333	0.944994	0.664673	0.624858
33.9	88.3333	0.946658	0.668064	0.629047
34	36.6667	0.948408	0.671675	0.633491
34.1	28.6667	0.950223	0.675503	0.638168
34.2	34.3333	0.952085	0.679544	0.643058
34.3	26.5	0.953994	0.683798	0.648159
34.4	45.5	0.955946	0.68826	0.653465
34.5	28	0.957946	0.692928	0.658978
34.6	47.5	0.959989	0.697798	0.664691
34.7	70.8333	0.962078	0.702867	0.670604
34.8	71.5	0.964225	0.708131	0.676729
34.9	86.8333	0.966436	0.713588	0.683066
35	85.1667	0.968714	0.719232	0.689617
35.1	69.6667	0.971061	0.725061	0.69638
35.2	135.333	0.973467	0.731069	0.703344
35.3	116.333	0.975956	0.737254	0.710528
35.4	77.6667	0.978533	0.743611	0.717934
35.5	132.5	0.981173	0.750134	0.725535
35.6	71.8333	0.98389	0.756821	0.733341
35.7	39.6667	0.986667	0.763666	0.74133
35.8	28.8333	0.989473	0.770664	0.74947
35.9	82.5	0.992293	0.777811	0.757741
36	113.167	0.995147	0.785101	0.766159
36.1	70.6667	0.998059	0.792531	0.774744
36.2	100.167	1.00101	0.800094	0.783478
36.3	86.3333	1.00401	0.807785	0.792357
36.4	78.5	1.00705	0.815599	0.801376
36.5	103	1.01012	0.82353	0.810521
36.6	83.1667	1.01324	0.831574	0.819794
36.7	158.667	1.01638	0.839724	0.829187
36.8	146	1.01959	0.847975	0.83872
36.9	72	1.02286	0.856322	0.848398
37	57.6667	1.02616	0.864757	0.858179
37.1	80.8333	1.02947	0.873277	0.868031
37.2	95.1667	1.03278	0.881874	0.877954
37.3	124.167	1.03612	0.890542	0.887952
37.4	115	1.03948	0.899277	0.898036
37.5	141.667	1.04287	0.908071	0.908199
37.6	140.333	1.0463	0.916919	0.918444
37.7	142	1.04977	0.925814	0.928769
37.8	97.3333	1.05328	0.93475	0.939166
37.9	95.3333	1.0568	0.943722	0.949609
38	127.667	1.06033	0.952723	0.960078
38.1	55.6667	1.06386	0.961746	0.97058
38.2	105.5	1.06738	0.970786	0.981081
38.3	100.167	1.07088	0.979836	0.991581
38.4	117.833	1.07438	0.98889	1.00208
38.5	121	1.07788	0.997941	1.01258
38.6	103	1.08137	1.00698	1.02307
38.7	120.333	1.08486	1.01601	1.03355
38.8	64.3333	1.08833	1.02502	1.044
38.9	50.1667	1.09177	1.034	1.0544
39	60.6667	1.09515	1.04294	1.06471
39.1	89.6667	1.09848	1.05185	1.07495
39.2	112	1.10176	1.06071	1.08511
39.3	42	1.10501	1.06952	1.0952
39.4	72.6667	1.1082	1.07827	1.10518
39.5	65.6667	1.11133	1.08695	1.11506
39.6	62.6667	1.11439	1.09557	1.12482
39.7	67.5	1.11739	1.10411	1.13446
39.8	72.6667	1.12031	1.11256	1.14397
39.9	51.3333	1.12317	1.12093	1.15334
40	49.6667	1.12595	1.12921	1.16257
40.1	26.5	1.12864	1.13738	1.17163
40.2	71.1667	1.13123	1.14545	1.18051
40.3	91.8333	1.13374	1.15341	1.18923
40.4	75	1.13617	1.16125	1.19778
40.5	75.1667	1.13853	1.16897	1.20618
40.6	104.5	1.14082	1.17656	1.21439
40.7	111	1.14303	1.18402	1.22244
40.8	80	1.14518	1.19135	1.23032
40.9	37.8333	1.14726	1.19853	1.23802
41	59.1667	1.14924	1.20556	1.2455
41.1	58.6667	1.15112	1.21244	1.25276
41.2	97.1667	1.15289	1.21916	1.2598
41.3	136.667	1.15458	1.22572	1.26664
41.4	139.167	1.15621	1.23211	1.27328
41.5	124.833	1.15779	1.23833	1.27975
41.6	116.667	1.15931	1.24438	1.28602
41.7	92.8333	1.16077	1.25025	1.29209
41.8	121.5	1.16215	1.25593	1.29794
41.9	76.8333	1.16345	1.26142	1.30357
42	69.6667	1.16467	1.26673	1.30897
42.1	110.167	1.16579	1.27183	1.31411
42.2	79.8333	1.16682	1.27674	1.31901
42.3	108.333	1.16776	1.28145	1.32367
42.4	89.1667	1.16861	1.28595	1.32808
42.5	100.833	1.16938	1.29024	1.33225
42.6	106.167	1.17005	1.29432	1.33616
42.7	128	1.17065	1.29819	1.33982
42.8	132.5	1.17117	1.30184	1.34324
42.9	116.333	1.17163	1.30526	1.34642
43	92.8333	1.17201	1.30847	1.34936
43.1	70.3333	1.17231	1.31145	1.35203
43.2	50	1.1725	1.31421	1.35443
43.3	85	1.17258	1.31673	1.35653
43.4	170.667	1.17255	1.31903	1.35835
43.5	119.5	1.17247	1.32109	1.35992
43.6	115.5	1.17232	1.32292	1.36126
43.7	118.833	1.1721	1.32452	1.36233
43.8	147.667	1.1718	1.32587	1.36314
43.9	102.333	1.17144	1.327	1.36371
44	101.5	1.17101	1.32788	1.36402
44.1	83.8333	1.17049	1.32853	1.36406
44.2	129.667	1.16988	1.32894	1.36382
44.3	131.833	1.1692	1.3291	1.36332
44.4	126.833	1.16845	1.32903	1.36257
44.5	108.167	1.16764	1.32872	1.36157
44.6	53.1667	1.16676	1.32817	1.3603
44.7	27.1667	1.16578	1.32738	1.35875
44.8	37.5	1.16468	1.32636	1.35689
44.9	100.333	1.16345	1.32509	1.35472
45	83.3333	1.16213	1.32359	1.35227
45.1	140	1.16073	1.32185	1.34955
45.2	149.333	1.15926	1.31988	1.34658
45.3	158.667	1.15775	1.31768	1.34339
45.4	138.5	1.15621	1.31524	1.33998
45.5	75.1667	1.15463	1.31257	1.33635
45.6	58.5	1.15297	1.30968	1.33247
45.7	106.333	1.15122	1.30655	1.32831
45.8	133.667	1.1494	1.30321	1.3239
45.9	149.5	1.14753	1.29964	1.31927
46	137.167	1.14563	1.29585	1.31444
46.1	110	1.14369	1.29185	1.30939
46.2	145.5	1.1417	1.28763	1.30413
46.3	122.333	1.13968	1.2832	1.29867
46.4	125.333	1.13763	1.27856	1.29301
46.5	109.167	1.13553	1.27372	1.28714
46.6	133.5	1.13339	1.26867	1.28107
46.7	125.333	1.13122	1.26343	1.27481
46.8	89	1.12901	1.25799	1.26837
46.9	93.1667	1.12676	1.25236	1.26172
47	107.333	1.12446	1.24654	1.25488
47.1	116	1.12212	1.24054	1.24785
47.2	111.5	1.11974	1.23437	1.24064
47.3	87	1.11733	1.22801	1.23326
47.4	83.6667	1.11489	1.22149	1.22571
47.5	52	1.11239	1.2148	1.21797
47.6	21	1.10984	1.20795	1.21005
47.7	36.5	1.10721	1.20094	1.20193
47.8	70.8333	1.1045	1.19378	1.19361
47.9	55.5	1.10174	1.18648	1.18512
48	75.3333	1.09892	1.17903	1.17646
48.1	160.101	1.09607	1.17145	1.16765
48.2	160.101	1.09322	1.16373	1.15874
48.3	160.101	1.09039	1.15589	1.14975
48.4	160.101	1.08758	1.14793	1.1407
48.5	160.101	1.08481	1.13985	1.13157
48.6	160.101	1.08207	1.13167	1.12239
48.7	160.101	1.07935	1.12338	1.11316
48.8	160.101	1.07668	1.11499	1.10388
48.9	160.101	1.07404	1.10651	1.09457
49	160.101	1.07144	1.09795	1.08523
49.1	160.101	1.06888	1.0893	1.07586
49.2	160.101	1.06637	1.08058	1.06648
49.3	160.101	1.0639	1.07179	1.05708
49.4	160.101	1.06148	1.06294	1.04769
49.5	160.101	1.05911	1.05403	1.03829
49.6	160.101	1.05679	1.04507	1.02891
49.7	160.101	1.05453	1.03607	1.01954
49.8	160.101	1.05232	1.02703	1.0102
49.9	160.101	1.05016	1.01796	1.00089
50	160.101	1.04807	1.00887	0.991612
50.1	226.667	1.04603	0.999753	0.98238
50.2	189.333	1.04409	0.990627	0.973229
50.3	186	1.04223	0.981495	0.964164
50.4	139.833	1.04047	0.972363	0.95518
50.5	126.833	1.03876	0.963238	0.946263
50.6	131	1.0371	0.954126	0.937402
50.7	111	1.03549	0.945034	0.928603
50.8	81	1.03392	0.935967	0.919864
50.9	111	1.03237	0.926933	0.911173
51	94	1.03086	0.917936	0.902543
51.1	28.1667	1.02938	0.908984	0.893979
51.2	106.5	1.0279	0.900084	0.885454
51.3	96.5	1.02644	0.89124	0.876995
51.4	64.5	1.02501	0.882459	0.868621
51.5	90.6667	1.02361	0.873747	0.860322
51.6	136.667	1.02223	0.865111	0.852107
51.7	100	1.02091	0.856557	0.844009
51.8	63	1.01964	0.84809	0.836029
51.9	82.5	1.01839	0.839716	0.828146
52	67.8333	1.01717	0.831441	0.820368
52.1	236.543	1.01597	0.823271	0.812696
52.2	236.543	1.01487	0.815211	0.805211
52.3	236.543	1.01391	0.807268	0.797955
52.4	236.543	1.01309	0.799447	0.790934
52.5	236.543	1.01241	0.791753	0.784152
52.6	236.543	1.01186	0.784191	0.777614
52.7	236.543	1.01146	0.776768	0.771325
52.8	236.543	1.0112	0.769487	0.765289
52.9	236.543	1.01108	0.762355	0.759509
53	236.543	1.01109	0.755376	0.753991
53.1	236.543	1.01125	0.748555	0.748737
53.2	236.543	1.01154	0.741897	0.743751
53.3	236.543	1.01198	0.735407	0.739037
53.4	236.543	1.01255	0.729089	0.734597
53.5	236.543	1.01326	0.722947	0.730435
53.6	236.543	1.01411	0.716986	0.726552
53.7	236.543	1.01509	0.71121	0.722952
53.8	236.543	1.01621	0.705624	0.719638
53.9	236.543	1.01746	0.70023	0.71661
54	236.543	1.01884	0.695033	0.71387
54.1	171	1.02036	0.690037	0.711421
54.2	169.5	1.02197	0.685245	0.709234
54.3	105.667	1.02367	0.68066	0.707295
54.4	36.3333	1.02541	0.676286	0.705575
54.5	15.6667	1.02717	0.672125	0.70403
54.6	26.3333	1.0289	0.668182	0.702636
54.7	57.5	1.03061	0.664458	0.701393
54.8	28.6667	1.03231	0.660956	0.700318
54.9	49.1667	1.03399	0.657678	0.699407
55	39	1.03566	0.654628	0.698663
55.1	57.5	1.03732	0.651807	0.698086
55.2	42.5	1.03896	0.649217	0.697683
55.3	9.33333	1.04059	0.64686	0.697451
55.4	33	1.04218	0.644738	0.697372
55.5	28.1667	1.04375	0.642852	0.697448
55.6	65.3333	1.04528	0.641204	0.697684
55.7	45.8333	1.04679	0.639795	0.698094
55.8	50.5	1.04829	0.638625	0.698679
55.9	65.1667	1.04977	0.637697	0.699434
56	41.3333	1.05123	0.63701	0.700367
56.1	222.43	1.05267	0.636565	0.701471
56.2	222.43	1.05416	0.636362	0.70282
56.3	222.43	1.05575	0.636402	0.704455
56.4	222.43	1.05742	0.636685	0.706375
56.5	222.43	1.05918	0.63721	0.708577
56.6	222.43	1.06103	0.637977	0.71106
56.7	222.43	1.06297	0.638986	0.713823
56.8	222.43	1.06499	0.640236	0.716862
56.9	222.43	1.06709	0.641727	0.720175
57	222.43	1.06927	0.643457	0.72376
57.1	222.43	1.07153	0.645425	0.727614
57.2	222.43	1.07387	0.64763	0.731734
57.3	222.43	1.07628	0.65007	0.736116
57.4	222.43	1.07876	0.652744	0.740758
57.5	222.43	1.08131	0.65565	0.745655
57.6	222.43	1.08393	0.658786	0.750804
57.7	222.43	1.08662	0.66215	0.756201
57.8	222.43	1.08937	0.665739	0.761842
57.9	222.43	1.09218	0.669552	0.767722
58	222.43	1.09505	0.673585	0.773837
58.1	135.5	1.09797	0.677836	0.780182
58.2	79.6667	1.10091	0.682301	0.786713
58.3	54.3333	1.10382	0.686979	0.793381
58.4	29.1667	1.10666	0.691865	0.800155
58.5	41.6667	1.10943	0.696957	0.807015
58.6	17.8333	1.11211	0.70225	0.813954
58.7	44.1667	1.1147	0.707741	0.82096
58.8	27.3333	1.11721	0.713427	0.828034
58.9	18.8333	1.11962	0.719303	0.835171
59	64	1.12193	0.725366	0.842356
59.1	47.5	1.12416	0.731611	0.849603
59.2	63.3333	1.12631	0.738034	0.856911
59.3	61.8333	1.12838	0.74463	0.864276
59.4	57.5	1.13036	0.751396	0.871698
59.5	41.6667	1.13227	0.758325	0.879168
59.6	75.1667	1.13408	0.765415	0.886672
59.7	93.3333	1.13581	0.772658	0.894217
59.8	39	1.13747	0.780052	0.901815
59.9	66.1667	1.13904	0.787589	0.909437
60	84	1.14052	0.795267	0.91708
60.1	202.313	1.14192	0.803078	0.924753
60.2	202.313	1.1433	0.811017	0.932506
60.3	202.313	1.14468	0.81908	0.940363
60.4	202.313	1.14607	0.82726	0.948316
60.5	202.313	1.14746	0.835552	0.956361
60.6	202.313	1.14885	0.843949	0.964492
60.7	202.313	1.15024	0.852447	0.972702
60.8	202.313	1.15163	0.86104	0.980986
60.9	202.313	1.15302	0.86972	0.989338
61	202.313	1.1544	0.878483	0.997752
61.1	202.313	1.15578	0.887322	1.00622
61.2	202.313	1.15716	0.896231	1.01474
61.3	202.313	1.15852	0.905204	1.0233
61.4	202.313	1.15988	0.914235	1.0319
61.5	202.313	1.16123	0.923317	1.04053
61.6	202.313	1.16257	0.932444	1.04919
61.7	202.313	1.16389	0.941609	1.05787
61.8	202.313	1.16521	0.950807	1.06655
61.9	202.313	1.16651	0.96003	1.07525
62	202.313	1.16779	0.969273	1.08394
62.1	107.333	1.16906	0.978529	1.09263
62.2	70.6667	1.17027	0.987792	1.10126
62.3	77.5	1.17139	0.997055	1.10979
62.4	100.333	1.17239	1.00631	1.11821
62.5	59	1.17331	1.01555	1.12653
62.6	112.167	1.17411	1.02478	1.13472
62.7	69	1.17482	1.03398	1.1428
62.8	53.1667	1.17543	1.04314	1.15075
62.9	95	1.17592	1.05227	1.15854
63	79.1667	1.17631	1.06135	1.1662
63.1	92.8333	1.1766	1.07038	1.17371
63.2	146	1.17678	1.07936	1.18108
63.3	116	1.1769	1.08826	1.18832
63.4	69.6667	1.17694	1.0971	1.19543
63.5	69.5	1.17688	1.10587	1.20237
63.6	65.5	1.17671	1.11455	1.20914
63.7	89.3333	1.17643	1.12314	1.21572
63.8	102.167	1.17604	1.13163	1.22212
63.9	144.5	1.17556	1.14003	1.22835
64	117.333	1.17502	1.14832	1.23442
64.1	175.428	1.1744	1.1565	1.24033
64.2	175.428	1.17374	1.16456	1.24609
64.3	175.428	1.17303	1.17249	1.25172
64.4	175.428	1.1723	1.1803	1.25721
64.5	175.428	1.17153	1.18797	1.26255
64.6	175.428	1.17072	1.1955	1.26774
64.7	175.428	1.16988	1.20289	1.27278
64.8	175.428	1.16901	1.21012	1.27767
64.9	175.428	1.16811	1.2172	1.2824
65	175.428	1.16717	1.22412	1.28697
65.1	175.428	1.16621	1.23087	1.29137
65.2	175.428	1.16522	1.23745	1.2956
65.3	175.428	1.1642	1.24386	1.29967
65.4	175.428	1.16315	1.25009	1.30356
65.5	175.428	1.16207	1.25613	1.30727
65.6	175.428	1.16097	1.26198	1.3108
65.7	175.428	1.15985	1.26765	1.31416
65.8	175.428	1.1587	1.27311	1.31733
65.9	175.428	1.15753	1.27838	1.32031
66	175.428	1.15633	1.28344	1.32311
66.1	135.333	1.15512	1.28829	1.32572
66.2	115	1.15387	1.29293	1.32812
66.3	59.8333	1.15256	1.29736	1.33029
66.4	66	1.15117	1.30157	1.3322
66.5	34.3333	1.14969	1.30556	1.33384
66.6	38	1.1481	1.30933	1.3352
66.7	31.5	1.14641	1.31287	1.33626
66.8	60.5	1.14461	1.31618	1.33704
66.9	91.8333	1.14271	1.31926	1.33752
67	79.5	1.14075	1.3221	1.33775
67.1	102.333	1.13871	1.32471	1.33772
67.2	137.667	1.13661	1.32709	1.33744
67.3	111.167	1.13448	1.32922	1.33692
67.4	100	1.13231	1.33112	1.33618
67.5	83.3333	1.13009	1.33277	1.33519
67.6	89.5	1.12781	1.33418	1.33394
67.7	48.1667	1.12548	1.33534	1.33244
67.8	73.5	1.12308	1.33626	1.33068
67.9	68.6667	1.12061	1.33693	1.32865
68	45.6667	1.11808	1.33736	1.32636
68.1	222.047	1.11549	1.33754	1.3238
68.2	222.047	1.11289	1.33747	1.32105
68.3	222.047	1.11035	1.33716	1.31814
68.4	222.047	1.10786	1.3366	1.31509
68.5	222.047	1.10543	1.33579	1.3119
68.6	222.047	1.10304	1.33474	1.30856
68.7	222.047	1.10072	1.33344	1.30508
68.8	222.047	1.09845	1.33189	1.30146
68.9	222.047	1.09625	1.33011	1.2977
69	222.047	1.09411	1.32808	1.29381
69.1	222.047	1.09203	1.3258	1.2898
69.2	222.047	1.09002	1.32329	1.28565
69.3	222.047	1.08807	1.32054	1.28138
69.4	222.047	1.08619	1.31756	1.27699
69.5	222.047	1.08439	1.31434	1.27248
69.6	222.047	1.08265	1.31089	1.26786
69.7	222.047	1.08099	1.30721	1.26312
69.8	222.047	1.07941	1.3033	1.25828
69.9	222.047	1.0779	1.29917	1.25333
70	222.047	1.07646	1.29482	1.24828
70.1	183.333	1.0751	1.29025	1.24314
70.2	165.5	1.07381	1.28546	1.23788
70.3	144.167	1.07256	1.28046	1.2325
70.4	117.5	1.07134	1.27526	1.22698
70.5	85.6667	1.07014	1.26984	1.22131
70.6	91.1667	1.06893	1.26423	1.21548
70.7	74	1.06772	1.25842	1.20949
70.8	73	1.0665	1.25241	1.20333
70.9	108.167	1.06526	1.24622	1.197
71	122.5	1.06403	1.23984	1.19052
71.1	134.167	1.0628	1.23328	1.18392
71.2	134.833	1.06161	1.22654	1.1772
71.3	93.3333	1.06045	1.21963	1.17038
71.4	102.333	1.05929	1.21256	1.16344
71.5	80.1667	1.05815	1.20532	1.15638
71.6	69.1667	1.05701	1.19793	1.14919
71.7	94.1667	1.05586	1.19039	1.14187
71.8	93.1667	1.05471	1.1827	1.13445
71.9	66.8333	1.05357	1.17487	1.12691
72	102	1.05242	1.1669	1.11927
72.1	191.585	1.05129	1.1588	1.11153
72.2	191.585	1.05021	1.15058	1.10375
72.3	191.585	1.04921	1.14224	1.09596
72.4	191.585	1.04828	1.13379	1.08815
72.5	191.585	1.04744	1.12523	1.08035
72.6	191.585	1.04668	1.11657	1.07254
72.7	191.585	1.046	1.10781	1.06474
72.8	191.585	1.0454	1.09896	1.05695
72.9	191.585	1.04488	1.09004	1.04918
73	191.585	1.04444	1.08103	1.04144
73.1	191.585	1.04408	1.07196	1.03372
73.2	191.585	1.04381	1.06282	1.02604
73.3	191.585	1.04362	1.05362	1.01839
73.4	191.585	1.04351	1.04438	1.01079
73.5	191.585	1.04348	1.03509	1.00324
73.6	191.585	1.04354	1.02576	0.995745
73.7	191.585	1.04368	1.0164	0.988309
73.8	191.585	1.0439	1.00701	0.980938
73.9	191.585	1.0442	0.997608	0.973638
74	191.585	1.04458	0.988192	0.966412
74.1	154.833	1.04504	0.978771	0.959267
74.2	134.333	1.04557	0.969352	0.95219
74.3	77.3333	1.04614	0.959941	0.945168
74.4	44.3333	1.04672	0.950544	0.938177
74.5	40.5	1.0473	0.941168	0.931192
74.6	33.3333	1.04784	0.93182	0.924209
74.7	27.3333	1.04836	0.922507	0.91723
74.8	22.1667	1.04885	0.913234	0.910255
74.9	50.1667	1.0493	0.904009	0.903285
75	88.3333	1.04972	0.894838	0.896336
75.1	62.1667	1.05014	0.885727	0.889437
75.2	75	1.05056	0.876683	0.88259
75.3	108.667	1.05096	0.867712	0.8758
75.4	131.833	1.05138	0.858821	0.869089
75.5	97.3333	1.05183	0.850015	0.86248
75.6	96.5	1.0523	0.841301	0.855968
75.7	69.6667	1.05277	0.832686	0.849549
75.8	34.8333	1.05325	0.824174	0.843214
75.9	49.1667	1.05369	0.815773	0.836947
76	16.1667	1.05411	0.807487	0.830751
76.1	202.633	1.05449	0.799324	0.824618
76.2	202.633	1.05491	0.791288	0.818629
76.3	202.633	1.05541	0.783386	0.812832
76.4	202.633	1.05599	0.775623	0.80723
76.5	202.633	1.05664	0.768004	0.801827
76.6	202.633	1.05738	0.760535	0.796627
76.7	202.633	1.05819	0.753221	0.791632
76.8	202.633	1.05907	0.746067	0.786848
76.9	202.633	1.06004	0.739079	0.782276
77	202.633	1.06107	0.732261	0.777919
77.1	202.633	1.06218	0.725619	0.773781
77.2	202.633	1.06336	0.719156	0.769865
77.3	202.633	1.06462	0.712878	0.766173
77.4	202.633	1.06594	0.706789	0.762706
77.5	202.633	1.06733	0.700893	0.759469
77.6	202.633	1.06879	0.695194	0.756462
77.7	202.633	1.07032	0.689698	0.753688
77.8	202.633	1.07191	0.684406	0.751148
77.9	202.633	1.07357	0.679324	0.748844
78	202.633	1.07529	0.674455	0.746777
78.1	118.833	1.07706	0.669802	0.744948
78.2	139	1.07886	0.665369	0.743321
78.3	81.5	1.08067	0.661159	0.741887
78.4	38	1.08247	0.657175	0.740624
78.5	46	1.08421	0.653419	0.739502
78.6	38.3333	1.08591	0.649895	0.738514
78.7	10.1667	1.08754	0.646606	0.737659
78.8	29.6667	1.0891	0.643552	0.736924
78.9	33	1.09059	0.640737	0.736312
79	67.5	1.09201	0.638163	0.735828
79.1	46.3333	1.09337	0.635832	0.73549
79.2	15.8333	1.09469	0.633744	0.735296
79.3	13.1667	1.09592	0.631903	0.735227
79.4	38.1667	1.09708	0.630309	0.735276
79.5	23.8333	1.09815	0.628963	0.735453
79.6	33.8333	1.09916	0.627867	0.735757
79.7	68.6667	1.10008	0.627021	0.73619
79.8	92.3333	1.10095	0.626425	0.736769
79.9	78.6667	1.10178	0.626082	0.737513
80	95	1.10257	0.62599	0.73842
80.1	152.374	1.10332	0.62615	0.739495
80.2	152.374	1.10407	0.626561	0.740765
80.3	152.374	1.10481	0.627225	0.742243
80.4	152.374	1.10557	0.628139	0.743928
80.5	152.374	1.10632	0.629305	0.745819
80.6	152.374	1.10707	0.63072	0.747914
80.7	152.374	1.10783	0.632384	0.750213
80.8	152.374	1.10859	0.634297	0.752712
80.9	152.374	1.10935	0.636455	0.755411
81	152.374	1.1101	0.63886	0.758308
81.1	152.374	1.11086	0.641507	0.7614
81.2	152.374	1.11162	0.644397	0.764685
81.3	152.374	1.11237	0.647526	0.768161
81.4	152.374	1.11312	0.650893	0.771826
81.5	152.374	1.11387	0.654496	0.775677
81.6	152.374	1.11461	0.658331	0.77971
81.7	152.374	1.11535	0.662397	0.783924
81.8	152.374	1.11608	0.666691	0.788315
81.9	152.374	1.1168	0.671208	0.79288
82	152.374	1.11752	0.675948	0.797616
82.1	168	1.11824	0.680906	0.802519
82.2	141.5	1.11895	0.686078	0.807593
82.3	46.3333	1.11965	0.691462	0.812826
82.4	19.3333	1.1203	0.697053	0.818166
82.5	5.5	1.12085	0.702848	0.823573
82.6	4.16667	1.12129	0.708842	0.829034
82.7	13.3333	1.12162	0.715032	0.834539
82.8	22.5	1.12185	0.721413	0.840089
82.9	12.8333	1.12197	0.727981	0.845687
83	35.3333	1.122	0.734731	0.851327
83.1	39.3333	1.12193	0.741658	0.857012
83.2	66.6667	1.12177	0.748758	0.862747
83.3	30.6667	1.12154	0.756026	0.868539
83.4	23.1667	1.12122	0.763457	0.874376
83.5	68.8333	1.12081	0.771044	0.880242
83.6	77.8333	1.12033	0.778784	0.886151
83.7	113.5	1.11978	0.786671	0.892115
83.8	82	1.11919	0.794699	0.898148
83.9	53.8333	1.11856	0.802863	0.904238
84	66.6667	1.11786	0.811156	0.910363
84.1	188.519	1.11709	0.819574	0.916517
84.2	188.519	1.11632	0.82811	0.922755
84.3	188.519	1.11556	0.836758	0.9291
84.4	188.519	1.11483	0.845513	0.935547
84.5	188.519	1.11412	0.854368	0.942092
84.6	188.519	1.11343	0.863316	0.948731
84.7	188.519	1.11277	0.872352	0.955458
84.8	188.519	1.11213	0.88147	0.96227
84.9	188.519	1.11151	0.890662	0.969161
85	188.519	1.11092	0.899923	0.976126
85.1	188.519	1.11035	0.909245	0.983161
85.2	188.519	1.10981	0.918623	0.990261
85.3	188.519	1.10929	0.92805	0.99742
85.4	188.519	1.1088	0.937519	1.00463
85.5	188.519	1.10834	0.947024	1.0119
85.6	188.519	1.1079	0.956557	1.01921
85.7	188.519	1.10749	0.966113	1.02655
85.8	188.519	1.10711	0.975684	1.03394
85.9	188.519	1.10676	0.985263	1.04135
86	188.519	1.10643	0.994845	1.04878
86.1	128	1.10613	1.00442	1.05623
86.2	68.1667	1.10584	1.01399	1.06367
86.3	45.8333	1.1055	1.02353	1.07105
86.4	58.5	1.1051	1.03306	1.07834
86.5	55.1667	1.10464	1.04255	1.08553
86.6	82.6667	1.10412	1.052	1.09263
86.7	104.667	1.10355	1.0614	1.09963
86.8	94.1667	1.10296	1.07076	1.10656
86.9	82.6667	1.10233	1.08006	1.11341
87	28.5	1.10166	1.08929	1.12015
87.1	56.6667	1.10093	1.09845	1.12677
87.2	95	1.10014	1.10753	1.13326
87.3	100.833	1.09931	1.11653	1.13964
87.4	77.6667	1.09845	1.12544	1.14591
87.5	29.6667	1.09756	1.13425	1.15206
87.6	24.5	1.09661	1.14295	1.15806
87.7	43.8333	1.09558	1.15155	1.1639
87.8	66.6667	1.0945	1.16003	1.16957
87.9	62.6667	1.09336	1.16839	1.17508
88	93	1.09218	1.17663	1.18045
88.1	200.781	1.09096	1.18473	1.18567
88.2	200.781	1.08978	1.19269	1.1908
88.3	200.781	1.08865	1.2005	1.19585
88.4	200.781	1.08756	1.20817	1.20083
88.5	200.781	1.08654	1.21568	1.20574
88.6	200.781	1.08556	1.22303	1.21056
88.7	200.781	1.08464	1.23021	1.2153
88.8	200.781	1.08378	1.23723	1.21995
88.9	200.781	1.08298	1.24406	1.2245
89	200.781	1.08223	1.25072	1.22897
89.1	200.781	1.08153	1.25719	1.23333
89.2	200.781	1.0809	1.26346	1.23759
89.3	200.781	1.08032	1.26955	1.24175
89.4	200.781	1.07981	1.27543	1.2458
89.5	200.781	1.07935	1.28111	1.24974
89.6	200.781	1.07895	1.28658	1.25357
89.7	200.781	1.07861	1.29185	1.25728
89.8	200.781	1.07833	1.29689	1.26087
89.9	200.781	1.07811	1.30172	1.26435
90	200.781	1.07795	1.30632	1.26769
90.1	139.5	1.07785	1.3107	1.27091
90.2	112.5	1.07779	1.31485	1.27398
90.3	84.5	1.07772	1.31877	1.27686
90.4	108.667	1.07765	1.32245	1.27953
90.5	75	1.07757	1.3259	1.282
90.6	53.5	1.07747	1.32911	1.28425
90.7	60	1.07734	1.33207	1.28627
90.8	42.6667	1.07716	1.33479	1.28806
90.9	107.167	1.07695	1.33727	1.2896
91	134.333	1.07672	1.33949	1.29091
91.1	44.5	1.0765	1.34147	1.29204
91.2	80.6667	1.07625	1.34319	1.29293
91.3	107	1.07598	1.34467	1.29359
91.4	116.667	1.07569	1.34588	1.29403
91.5	122.5	1.07541	1.34685	1.29427
91.6	105.167	1.07514	1.34756	1.29431
91.7	118.667	1.07487	1.34801	1.29414
91.8	77	1.07461	1.34821	1.29377
91.9	106.167	1.07433	1.34815	1.29318
92	105.5	1.07404	1.34783	1.29237
92.1	188.519	1.07375	1.34726	1.29135
92.2	188.519	1.0735	1.34644	1.29016
92.3	188.519	1.07331	1.34535	1.28882
92.4	188.519	1.07317	1.34401	1.28733
92.5	188.519	1.07308	1.34242	1.28569
92.6	188.519	1.07306	1.34058	1.2839
92.7	188.519	1.07308	1.33848	1.28197
92.8	188.519	1.07317	1.33614	1.27988
92.9	188.519	1.0733	1.33354	1.27766
93	188.519	1.0735	1.3307	1.27529
93.1	188.519	1.07374	1.32761	1.27277
93.2	188.519	1.07405	1.32428	1.27012
93.3	188.519	1.0744	1.32071	1.26733
93.4	188.519	1.07481	1.31691	1.2644
93.5	188.519	1.07528	1.31286	1.26134
93.6	188.519	1.0758	1.30859	1.25815
93.7	188.519	1.07636	1.30408	1.25482
93.8	188.519	1.07699	1.29935	1.25136
93.9	188.519	1.07766	1.2944	1.24778
94	188.519	1.07838	1.28922	1.24408
94.1	155.167	1.07915	1.28383	1.24025
94.2	116.5	1.07996	1.27823	1.23629
94.3	82.8333	1.08078	1.27242	1.23217
94.4	65.6667	1.08158	1.2664	1.22788
94.5	132.667	1.08234	1.26019	1.22339
94.6	129.167	1.0831	1.25377	1.21874
94.7	152.833	1.08387	1.24717	1.21395
94.8	135.333	1.08465	1.24038	1.20903
94.9	74.8333	1.08545	1.23341	1.20398
95	72.5	1.08622	1.22626	1.19877
95.1	56.6667	1.08696	1.21894	1.19339
95.2	72.3333	1.08766	1.21145	1.18783
95.3	64	1.08832	1.2038	1.18212
95.4	87.5	1.08893	1.19599	1.17624
95.5	70.6667	1.08951	1.18803	1.17021
95.6	57.3333	1.09006	1.17993	1.16403
95.7	103	1.09056	1.17168	1.1577
95.8	84.6667	1.09104	1.16331	1.15124
95.9	63.5	1.09148	1.1548	1.14465
96	117.5	1.09189	1.14617	1.13794
96.1	81.3333	1.09228	1.13743	1.13111
96.2	85.1667	1.09263	1.12858	1.12418
96.3	59.1667	1.09296	1.11962	1.11713
96.4	73.6667	1.09324	1.11057	1.10997
96.5	64.3333	1.09348	1.10142	1.1027
96.6	55.6667	1.09368	1.09219	1.09533
96.7	37.6667	1.09383	1.08288	1.08785
96.8	43.5	1.09391	1.0735	1.08026
96.9	49.5	1.09393	1.06406	1.07256
97	54.8333	1.0939	1.05456	1.06476
97.1	30	1.09381	1.045	1.05688
97.2	46.1667	1.09366	1.0354	1.0489
97.3	90.5	1.09345	1.02577	1.04084
97.4	100.333	1.09319	1.0161	1.03272
97.5	50	1.09292	1.00641	1.02457
97.6	29	1.0926	0.996697	1.01637
97.7	20	1.09222	0.986977	1.0081
97.8	23.1667	1.09176	0.977252	0.99977
97.9	45.6667	1.09124	0.967531	0.991374
98	89.6667	1.09065	0.95782	0.982933
98.1	78.3333	1.09003	0.948125	0.974478
98.2	93.6667	1.08937	0.938454	0.966021
98.3	43.1667	1.08869	0.928814	0.957571
98.4	13.3333	1.08797	0.91921	0.949115
98.5	20.3333	1.08718	0.909651	0.940635
98.6	44.8333	1.08632	0.900143	0.932133
98.7	78.8333	1.0854	0.890692	0.923629
98.8	49.5	1.08445	0.881306	0.915148
98.9	76.8333	1.08345	0.87199	0.906693
99	105.667	1.08242	0.862752	0.898274
99.1	121.833	1.08138	0.853598	0.889918
99.2	121.333	1.08034	0.844535	0.881645
99.3	87.6667	1.07931	0.835568	0.873463
99.4	46.1667	1.07826	0.826705	0.865363
99.5	23.3333	1.07718	0.817952	0.857325
99.6	13.1667	1.07605	0.809314	0.849335
99.7	9.16667	1.07486	0.800799	0.841389
99.8	13.3333	1.0736	0.792411	0.833489
99.9	13	1.07227	0.784157	0.825642
100	40	1.07089	0.776044	0.817854
100.1	58	1.06946	0.768075	0.810143
100.2	41.3333	1.06799	0.760258	0.80253
100.3	107.167	1.0665	0.752598	0.795016
100.4	88.6667	1.06499	0.745101	0.787634
100.5	125.667	1.06349	0.73777	0.780394
100.6	98	1.062	0.730613	0.773316
100.7	69.3333	1.06052	0.723634	0.7664
100.8	77.5	1.05904	0.716837	0.759632
100.9	102.333	1.05754	0.710228	0.753014
101	50.5	1.05606	0.703812	0.746564
101.1	47.3333	1.05456	0.697593	0.74027
101.2	31.5	1.05304	0.691575	0.734122
101.3	46.5	1.0515	0.685763	0.728118
101.4	54.6667	1.04993	0.680161	0.722265
101.5	29.6667	1.04834	0.674773	0.716574
101.6	27.6667	1.04673	0.669602	0.711041
101.7	39	1.04509	0.664653	0.705663
101.8	39.6667	1.04343	0.65993	0.700448
101.9	27	1.04175	0.655434	0.695405
102	34	1.04004	0.651171	0.69053
102.1	51.3333	1.03832	0.647141	0.685829
102.2	118.833	1.03658	0.64335	0.681313
102.3	78.8333	1.03487	0.639799	0.677022
102.4	97.6667	1.03318	0.636491	0.672955
102.5	81.8333	1.03152	0.633428	0.669115
102.6	103.167	1.02989	0.630613	0.665502
102.7	64.5	1.02828	0.628047	0.662125
102.8	59.1667	1.0267	0.625733	0.658973
102.9	41.6667	1.02512	0.623671	0.656039
103	28.1667	1.02354	0.621865	0.653315
103.1	13	1.02196	0.620314	0.650793
103.2	13.5	1.02036	0.619021	0.648465
103.3	21.8333	1.01875	0.617985	0.646331
103.4	28.3333	1.01712	0.617209	0.644395
103.5	51.1667	1.01549	0.616691	0.642664
103.6	45.1667	1.01386	0.616434	0.641152
103.7	53	1.01225	0.616437	0.639862
103.8	66.1667	1.01065	0.6167	0.638798
103.9	62.6667	1.00907	0.617223	0.637967
104	56	1.00752	0.618005	0.637374
104.1	95.5	1.006	0.619047	0.637013
104.2	93.5	1.00451	0.620348	0.636902
104.3	24	1.00308	0.621906	0.63705
104.4	32.5	1.00166	0.62372	0.637424
104.5	27.8333	1.00025	0.62579	0.638013
104.6	20.8333	0.998857	0.628114	0.638815
104.7	40.1667	0.997467	0.630691	0.639827
104.8	37	0.996093	0.633517	0.641055
104.9	86.5	0.994737	0.636593	0.642501
105	60.1667	0.993424	0.639915	0.644186
105.1	62.6667	0.992153	0.643481	0.646108
105.2	44.6667	0.99092	0.647289	0.648262
105.3	39	0.989719	0.651336	0.650638
105.4	34	0.988544	0.655619	0.653228
105.5	80.6667	0.987393	0.660135	0.656026
105.6	52.3333	0.986286	0.664882	0.659052
105.7	69.3333	0.985222	0.669855	0.662301
105.8	111.167	0.984204	0.675052	0.665771
105.9	58.5	0.983254	0.680468	0.669483
106	62.5	0.982359	0.686101	0.67342
106.1	70.6667	0.981509	0.691945	0.677569
106.2	48.3333	0.98071	0.697997	0.681933
106.3	67.5	0.979955	0.704252	0.686499
106.4	90.3333	0.979247	0.710707	0.691268
106.5	63	0.978601	0.717357	0.696252
106.6	61.1667	0.978011	0.724196	0.70144
106.7	74.5	0.97747	0.731221	0.70682
106.8	50.1667	0.976984	0.738426	0.712395
106.9	45.6667	0.976545	0.745806	0.718153
107	53.1667	0.976147	0.753356	0.724082
107.1	121.5	0.975791	0.761071	0.730181
107.2	106	0.975511	0.768945	0.736477
107.3	79.1667	0.975315	0.776973	0.742975
107.4	58.6667	0.975188	0.785149	0.749654
107.5	40.5	0.975114	0.793467	0.756494
107.6	70.5	0.975081	0.801922	0.763478
107.7	96.8333	0.975097	0.810507	0.770609
107.8	133.667	0.975182	0.819216	0.777902
107.9	69.3333	0.975357	0.828044	0.785373
108	86.1667	0.975603	0.836984	0.792997
108.1	40.1667	0.975911	0.84603	0.80076
108.2	73.5	0.976264	0.855175	0.808641
108.3	103.5	0.976667	0.864412	0.816639
108.4	100.333	0.97714	0.873737	0.824768
108.5	51.8333	0.977688	0.883141	0.833028
108.6	77.1667	0.978287	0.892618	0.84139
108.7	91.3333	0.978939	0.902161	0.84985
108.8	99.5	0.979654	0.911764	0.858412
108.9	74.3333	0.980438	0.921421	0.867077
109	47.3333	0.981281	0.931123	0.87583
109.1	85.5	0.982165	0.940864	0.884646
109.2	76.5	0.9831	0.950638	0.89353
109.3	46.5	0.984089	0.960437	0.90248
109.4	111.5	0.985117	0.970255	0.911474
109.5	108.833	0.986204	0.980084	0.920527
109.6	82.3333	0.987363	0.989918	0.929648
109.7	112	0.988581	0.999749	0.938816
109.8	80.3333	0.989864	1.00957	0.948032
109.9	51.5	0.991203	1.01938	0.957281
110	116.667	0.992577	1.02916	0.966538
110.1	118.5	0.994007	1.03891	0.975817
110.2	104.167	0.995508	1.04863	0.985128
110.3	119.167	0.997072	1.0583	0.994457
110.4	116.667	0.998702	1.06792	1.0038
110.5	161.667	1.0004	1.07748	1.01316
110.6	109	1.00218	1.08698	1.02254
110.7	110.667	1.00403	1.09641	1.03192
110.8	78	1.00594	1.10576	1.04128
110.9	48.1667	1.00788	1.11502	1.05061
111	104.5	1.00985	1.1242	1.05988
111.1	60.8333	1.01185	1.13327	1.06909
111.2	69.5	1.01388	1.14224	1.07823
111.3	117	1.01592	1.15111	1.0873
111.4	114.833	1.01801	1.15985	1.0963
111.5	126.333	1.02014	1.16847	1.10524
111.6	98.1667	1.02233	1.17697	1.11413
111.7	37.5	1.02455	1.18532	1.12293
111.8	67.8333	1.02678	1.19354	1.13161
111.9	78.5	1.02901	1.20161	1.14017
112	76.8333	1.03125	1.20953	1.14861
112.1	67.5	1.0335	1.21729	1.15693
112.2	126	1.03576	1.22489	1.16511
112.3	111.167	1.03804	1.23231	1.17317
112.4	88	1.04035	1.23956	1.18111
112.5	121.333	1.04268	1.24664	1.18892
112.6	135.833	1.04504	1.25353	1.1966
112.7	103.833	1.04743	1.26022	1.20415
112.8	87.5	1.04984	1.26673	1.21156
112.9	78.6667	1.05226	1.27303	1.21881
113	50.5	1.05468	1.27914	1.22589
113.1	51.6667	1.05707	1.28503	1.23277
113.2	66.8333	1.05944	1.29071	1.23945
113.3	83.5	1.06178	1.29618	1.24592
113.4	104.167	1.06411	1.30143	1.25219
113.5	59.6667	1.06644	1.30645	1.25828
113.6	103.333	1.06875	1.31124	1.26416
113.7	95.8333	1.07104	1.31581	1.26983
113.8	106.833	1.07333	1.32014	1.2753
113.9	119.333	1.07561	1.32423	1.28057
114	142.167	1.07789	1.32809	1.28564
114.1	123.333	1.08018	1.3317	1.29052
114.2	123.333	1.08248	1.33507	1.29521
114.3	108.833	1.08478	1.33818	1.29969
114.4	100.833	1.08707	1.34105	1.30396
114.5	119.333	1.08934	1.34367	1.308
114.6	109.5	1.0916	1.34603	1.31182
114.7	58.8333	1.09384	1.34814	1.31542
114.8	47.1667	1.09604	1.34999	1.31876
114.9	50	1.09818	1.35158	1.32184
115	57.8333	1.10026	1.35291	1.32464
115.1	88.8333	1.10228	1.35398	1.32716
115.2	120.667	1.10425	1.35479	1.32943
115.3	97.8333	1.10619	1.35534	1.33145
115.4	122.5	1.1081	1.35562	1.33324
115.5	123.333	1.10999	1.35564	1.33478
115.6	79.5	1.11185	1.3554	1.33609
115.7	78.8333	1.11367	1.3549	1.33714
115.8	48.8333	1.11543	1.35414	1.33792
115.9	98	1.11713	1.35311	1.33842
116	122.667	1.11876	1.35182	1.33866
116.1	87.5	1.12036	1.35027	1.33865
116.2	131	1.12192	1.34846	1.33838
116.3	150.667	1.12343	1.3464	1.33787
116.4	82.3333	1.12493	1.34408	1.33714
116.5	82.6667	1.12638	1.3415	1.33616
116.6	85.5	1.12777	1.33867	1.33491
116.7	84.3333	1.1291	1.33559	1.3334
116.8	82	1.13036	1.33226	1.33162
116.9	139.5	1.13156	1.32869	1.32959
117	129.833	1.13271	1.32487	1.32732
117.1	118.333	1.13383	1.3208	1.32482
117.2	63.3333	1.13491	1.3165	1.3221
117.3	80.6667	1.13592	1.31197	1.31911
117.4	76.5	1.13686	1.3072	1.31587
117.5	103.833	1.13772	1.3022	1.31237
117.6	106	1.13851	1.29698	1.30864
117.7	101.833	1.13925	1.29154	1.30467
117.8	100.833	1.13994	1.28588	1.30047
117.9	99.3333	1.14056	1.28	1.29604
118	90.8333	1.14112	1.27392	1.29139
118.1	106.167	1.14161	1.26763	1.28651
118.2	74	1.14204	1.26113	1.28142
118.3	63.6667	1.1424	1.25444	1.2761
118.4	42.8333	1.14267	1.24756	1.27054
118.5	85.5	1.14285	1.2405	1.26474
118.6	89.5	1.14294	1.23325	1.25873
118.7	91.5	1.14296	1.22582	1.2525
118.8	136.833	1.14292	1.21823	1.24607
118.9	34.5	1.14282	1.21046	1.23947
119	66	1.14265	1.20254	1.23267
119.1	66.1667	1.14238	1.19446	1.22565
119.2	79.3333	1.14202	1.18623	1.21843
119.3	77.1667	1.14159	1.17786	1.21103
119.4	76.1667	1.14108	1.16935	1.20345
119.5	106.667	1.14049	1.16071	1.1957
119.6	92	1.13985	1.15194	1.18779
119.7	92.6667	1.13914	1.14305	1.17973
119.8	52.5	1.13836	1.13405	1.17153
119.9	96.3333	1.13751	1.12495	1.16317
120	107.333	1.13659	1.11574	1.15467
120.1	79	1.13561	1.10644	1.14604
120.2	63.8333	1.13457	1.09705	1.13729
120.3	66.3333	1.13346	1.08759	1.12842
120.4	75.8333	1.13227	1.07804	1.11941
120.5	78.8333	1.13101	1.06844	1.11029
120.6	39.1667	1.12968	1.05877	1.10107
120.7	29	1.12827	1.04905	1.09173
120.8	41.6667	1.12677	1.03928	1.08227
120.9	66	1.12517	1.02947	1.07269
121	101.833	1.1235	1.01963	1.06303
121.1	54.5	1.12179	1.00976	1.0533
121.2	67.6667	1.12001	0.999878	1.04351
121.3	23.1667	1.11816	0.989982	1.03365
121.4	38.1667	1.11623	0.980081	1.02371
121.5	107.167	1.11422	0.970182	1.01371
121.6	84	1.11216	0.960293	1.00368
121.7	68.1667	1.11006	0.95042	0.993626
121.8	94.5	1.10792	0.94057	0.983554
121.9	143.833	1.10573	0.930751	0.973477
122	99.6667	1.10353	0.92097	0.963431
122.1	119.333	1.10132	0.911232	0.953413
122.2	79.8333	1.09909	0.901546	0.943431
122.3	56.6667	1.09683	0.891918	0.933478
122.4	66.6667	1.09453	0.882355	0.923543
122.5	27	1.09218	0.872863	0.913631
122.6	43.1667	1.08978	0.86345	0.903734
122.7	29.3333	1.08732	0.854122	0.893859
122.8	67.3333	1.0848	0.844886	0.88401
122.9	67	1.08224	0.835748	0.874208
123	47.8333	1.07965	0.826714	0.86447
123.1	26.6667	1.07702	0.817792	0.854793
123.2	60.5	1.07434	0.808987	0.845172
123.3	86.6667	1.07163	0.800307	0.835624
123.4	101.667	1.0689	0.791755	0.826175
123.5	116	1.06617	0.78334	0.816845
123.6	88	1.06346	0.775067	0.807652
123.7	86	1.06075	0.766942	0.798593
123.8	45	1.05804	0.75897	0.789666
123.9	54	1.05532	0.751158	0.780861
124	32	1.05258	0.74351	0.772177
124.1	75.1667	1.04981	0.736032	0.763614
124.2	67	1.04703	0.72873	0.755193
124.3	70.6667	1.04426	0.721609	0.746927
124.4	72.6667	1.04149	0.714674	0.73882
124.5	53.3333	1.03872	0.707929	0.730882
124.6	66.5	1.03596	0.70138	0.723109
124.7	81.1667	1.0332	0.69503	0.715509
124.8	68	1.03045	0.688886	0.708098
124.9	51.5	1.02772	0.68295	0.700879
125	28.3333	1.02501	0.677228	0.693845
125.1	61	1.02228	0.671723	0.686989
125.2	42	1.01957	0.666439	0.680326
125.3	72	1.01686	0.661381	0.673858
125.4	93.3333	1.01417	0.656551	0.667601
125.5	109.167	1.01152	0.651952	0.661575
125.6	117	1.00893	0.64759	0.655798
125.7	99	1.0064	0.643465	0.650279
125.8	113.333	1.00392	0.639582	0.645018
125.9	61.8333	1.00151	0.635943	0.640021
126	58.6667	0.999143	0.632551	0.635271
126.1	85.8333	0.996808	0.629407	0.630759
126.2	91.3333	0.994519	0.626515	0.626499
126.3	92.6667	0.992287	0.623877	0.622504
126.4	60.5	0.990116	0.621493	0.618779
126.5	72.3333	0.987993	0.619367	0.615312
126.6	40.1667	0.985917	0.617499	0.612104
126.7	76	0.983879	0.615891	0.609144
126.8	42.6667	0.981889	0.614544	0.606446
126.9	14.5	0.979941	0.613459	0.604003
127	16.5	0.978017	0.612637	0.601798
127.1	34.6667	0.976113	0.612078	0.599826
127.2	31	0.97424	0.611783	0.598098
127.3	44	0.9724	0.611751	0.596618
127.4	38.6667	0.970601	0.611984	0.595391
127.5	66	0.968844	0.61248	0.59442
127.6	56.6667	0.967143	0.61324	0.593717
127.7	60.5	0.9655	0.614263	0.593284
127.8	46.5	0.963917	0.615548	0.593121
127.9	67	0.962389	0.617095	0.593224
128	63.8333	0.960923	0.618901	0.593597
128.1	96.3333	0.959524	0.620967	0.594244
128.2	49.6667	0.958206	0.62329	0.595179
128.3	51.3333	0.956958	0.625869	0.596388
128.4	29.1667	0.95577	0.628702	0.597859
128.5	40.5	0.954633	0.631787	0.599582
128.6	18	0.953548	0.635122	0.601556
128.7	62.6667	0.952509	0.638705	0.603772
128.8	62	0.951531	0.642533	0.606244
128.9	67.3333	0.950625	0.646602	0.60898
129	86.6667	0.949794	0.650912	0.611979
129.1	87.6667	0.949049	0.655457	0.615251
129.2	48.1667	0.948394	0.660236	0.618797
129.3	63.1667	0.947812	0.665244	0.622597
129.4	23.8333	0.947303	0.670479	0.626646
129.5	16.5	0.946851	0.675936	0.630927
129.6	43.8333	0.946444	0.681612	0.635425
129.7	22.6667	0.946094	0.687503	0.640146
129.8	28.3333	0.945798	0.693604	0.645085
129.9	50	0.945552	0.699911	0.650236
130	45.8333	0.94537	0.706419	0.655605
130.1	77.6667	0.945253	0.713125	0.661192
130.2	96.3333	0.945215	0.720023	0.667007
130.3	84.3333	0.945271	0.727109	0.673061
130.4	62.5	0.945422	0.734377	0.679348
130.5	47.5	0.945652	0.741822	0.68585
130.6	58	0.945951	0.749439	0.692553
130.7	90.1667	0.946319	0.757223	0.699451
130.8	132.833	0.946773	0.765168	0.706557
130.9	136	0.947339	0.773268	0.713893
131	79.3333	0.948028	0.781518	0.721463
131.1	74.8333	0.948813	0.789912	0.729238
131.2	44.3333	0.94968	0.798444	0.737196
131.3	45.3333	0.950612	0.807108	0.745318
131.4	73.8333	0.951602	0.815897	0.75359
131.5	87.1667	0.952662	0.824806	0.762019
131.6	118.833	0.953804	0.833828	0.770612
131.7	76.8333	0.955044	0.842957	0.77938
131.8	50.6667	0.956369	0.852186	0.788305
131.9	46.8333	0.957757	0.861509	0.797358
132	70.5	0.959198	0.870919	0.806525
132.1	66.3333	0.960701	0.88041	0.81581
132.2	67.1667	0.962268	0.889974	0.825208
132.3	88.1667	0.963898	0.899605	0.834713
132.4	77.1667	0.965598	0.909297	0.844326
132.5	85	0.967367	0.919042	0.854041
132.6	117.167	0.969205	0.928833	0.863852
132.7	93	0.971125	0.938664	0.873767
132.8	43.3333	0.973123	0.948527	0.883776
132.9	92.6667	0.975169	0.958416	0.893843
133	139.167	0.977271	0.968323	0.903971
133.1	144.333	0.979462	0.978242	0.914186
133.2	61.3333	0.981751	0.988165	0.924493
133.3	55.6667	0.9841	0.998086	0.934846
133.4	64.3333	0.986486	1.008	0.945219
133.5	83.6667	0.988909	1.01789	0.955604
133.6	100	0.991377	1.02776	0.966006
133.7	117.333	0.993902	1.0376	0.976428
133.8	95.1667	0.996491	1.0474	0.986874
133.9	106.5	0.999137	1.05716	0.997331
134	126.667	1.00184	1.06687	1.00779
134.1	64.8333	1.0046	1.07652	1.01825
134.2	70	1.0074	1.0861	1.0287
134.3	112.5	1.01023	1.09561	1.03909
134.4	112.833	1.0131	1.10504	1.04946
134.5	106.167	1.01601	1.11439	1.05979
134.6	96.3333	1.01897	1.12364	1.07008
134.7	105.5	1.02197	1.1328	1.08032
134.8	133	1.025	1.14185	1.0905
134.9	72.1667	1.02808	1.15079	1.10063
135	43.6667	1.03118	1.15961	1.11067
135.1	58.8333	1.03427	1.16831	1.1206
135.2	65	1.03736	1.17688	1.13041
135.3	44.3333	1.04043	1.18531	1.14009
135.4	76.8333	1.0435	1.1936	1.14963
135.5	80.8333	1.04655	1.20174	1.15904
135.6	96	1.04961	1.20972	1.16831
135.7	138.5	1.05267	1.21755	1.17745
135.8	159	1.05575	1.22521	1.18647
135.9	138.5	1.05887	1.2327	1.19538
136	143.667	1.06203	1.24002	1.20418
136.1	137.5	1.06521	1.24715	1.21285
136.2	104.167	1.06842	1.2541	1.22139
136.3	80.6667	1.07163	1.26086	1.22977
136.4	71.1667	1.07483	1.26742	1.23796
136.5	104.833	1.078	1.27378	1.24597
136.6	130.5	1.08114	1.27994	1.25378
136.7	83.3333	1.08429	1.28588	1.26141
136.8	65.6667	1.08742	1.29162	1.26885
136.9	56	1.09051	1.29713	1.27606
137	69.6667	1.09354	1.30243	1.28304
137.1	77	1.09653	1.3075	1.28977
137.2	42.1667	1.09947	1.31234	1.29628
137.3	84	1.10235	1.31695	1.30252
137.4	70	1.10517	1.32132	1.30852
137.5	99.6667	1.10794	1.32545	1.31427
137.6	95.8333	1.11066	1.32935	1.31977
137.7	110.5	1.11335	1.33299	1.32503
137.8	132.167	1.11599	1.3364	1.33005
137.9	105.333	1.11861	1.33955	1.33484
138	97.1667	1.12119	1.34245	1.33938
138.1	96.5	1.12372	1.3451	1.34367
138.2	104	1.1262	1.34749	1.34769
138.3	80.3333	1.12863	1.34963	1.35146
138.4	61.6667	1.13099	1.3515	1.35494
138.5	71.6667	1.13328	1.35312	1.35814
138.6	114.667	1.13548	1.35447	1.36105
138.7	129.667	1.13763	1.35557	1.36368
138.8	143.5	1.13973	1.3564	1.36606
138.9	141	1.1418	1.35697	1.36819
139	169.333	1.14383	1.35727	1.37006
139.1	150.333	1.14583	1.35731	1.3717
139.2	153	1.1478	1.35709	1.37309
139.3	98	1.14974	1.3566	1.37424
139.4	112.5	1.15162	1.35585	1.37511
139.5	103.333	1.15343	1.35484	1.37571
139.6	91.1667	1.15517	1.35356	1.37602
139.7	105.667	1.15684	1.35202	1.37605
139.8	100.167	1.15842	1.35023	1.37579
139.9	89	1.15993	1.34817	1.37525
140	141.833	1.16136	1.34586	1.37441
140.1	113.167	1.16272	1.34329	1.37331
140.2	135.667	1.16401	1.34046	1.37195
140.3	136.333	1.16525	1.33739	1.37032
140.4	130	1.16642	1.33407	1.36843
140.5	119.833	1.16753	1.33049	1.36628
140.6	102.5	1.16858	1.32668	1.36387
140.7	142.833	1.16954	1.32262	1.36119
140.8	158.167	1.17044	1.31832	1.35826
140.9	103.667	1.17128	1.31379	1.35509
141	89.6667	1.17206	1.30902	1.35166
141.1	86.8333	1.17274	1.30403	1.34796
141.2	124.5	1.17332	1.2988	1.34399
141.3	116.5	1.17383	1.29336	1.33976
141.4	87.5	1.17426	1.2877	1.33528
141.5	123.833	1.17459	1.28182	1.33055
141.6	85.3333	1.17485	1.27573	1.32557
141.7	109.167	1.17501	1.26944	1.32034
141.8	167.167	1.17509	1.26295	1.31487
141.9	69.8333	1.17511	1.25625	1.30919
142	71.3333	1.17504	1.24937	1.30327
142.1	85.6667	1.17486	1.2423	1.2971
142.2	128.167	1.17458	1.23505	1.29069
142.3	141.833	1.17422	1.22762	1.28407
142.4	89.5	1.1738	1.22002	1.27725
142.5	47.3333	1.1733	1.21225	1.27022
142.6	40.1667	1.17268	1.20432	1.26296
142.7	87.1667	1.17194	1.19624	1.25545
142.8	131.167	1.17109	1.18801	1.24773
142.9	138.333	1.17017	1.17963	1.23983
143	99.6667	1.16919	1.17112	1.23176
143.1	46.5	1.16813	1.16247	1.22353
143.2	49	1.16697	1.1537	1.2151
143.3	81.6667	1.16569	1.14481	1.20646
143.4	105.833	1.16431	1.13581	1.19764
143.5	110.333	1.16286	1.1267	1.18867
143.6	58.3333	1.16133	1.11749	1.17955
143.7	105.5	1.15971	1.10819	1.17028
143.8	97.3333	1.15801	1.09879	1.16087
143.9	65.8333	1.15623	1.08932	1.15132
144	77.8333	1.15437	1.07978	1.14165

## Sheet: D
Time[hrs]	Activity	Wake	Model 1 (Fwake)	Model 2 (Fperi)	Model 3 (Fwake + Fperi))			Time[hrs]	Bioluminescence
-11.9	92.6	0.051333	0.864049	0.768887	0.81275			-10.5	1.10025
-11.8	138	0.065111	0.86204	0.776376	0.822052			-10	1.12376
-11.7	37.2	0.036444	0.860216	0.784007	0.831484			-9.5	1.02832
-11.6	4.4	0.027556	0.858535	0.791775	0.841004			-9	1.04401
-11.5	35.6	0.035556	0.856953	0.799674	0.850567			-8.5	1.04985
-11.4	68.6	0.06	0.855476	0.8077	0.860173			-8	1.28018
-11.3	52.4	0.054667	0.854133	0.815845	0.869837			-7.5	1.04668
-11.2	96.8	0.062222	0.852925	0.824106	0.879552			-7	1.22218
-11.1	38.2	0.040222	0.851871	0.832475	0.889327			-6.5	1.27068
-11	62.8	0.044889	0.850952	0.840946	0.899139			-6	1.59981
-10.9	59.2	0.041556	0.850165	0.849515	0.908977			-5.5	1.34637
-10.8	112.6	0.071778	0.849515	0.858175	0.91884			-5	1.37598
-10.7	102.4	0.077778	0.84903	0.866919	0.928743			-4.5	1.26991
-10.6	110	0.084667	0.848719	0.875743	0.938686			-4	1.43234
-10.5	156.6	0.086222	0.848583	0.884638	0.948663			-3.5	1.47882
-10.4	138	0.078222	0.848649	0.8936	0.958689			-3	1.30421
-10.3	96	0.059556	0.848919	0.902622	0.968761			-2.5	1.39862
-10.2	102.2	0.052889	0.849364	0.911698	0.978846			-2	1.34689
-10.1	33.2	0.039556	0.849975	0.92082	0.98893			-1.5	1.36891
-10	26.8	0.028222	0.850714	0.929984	0.998977			-1	1.18988
-9.9	131.6	0.064889	0.851558	0.939182	1.00896			-0.5	1.31517
-9.8	146.2	0.084	0.852562	0.948408	1.01892			0	1.03223
-9.7	212	0.093556	0.853763	0.957656	1.02888			0.5	0.886352
-9.6	117.2	0.070667	0.855197	0.966919	1.03886			1	1.2337
-9.5	90	0.065111	0.85683	0.976191	1.04883			1.5	1.11477
-9.4	79.8	0.063778	0.858619	0.985465	1.05875			2	0.946669
-9.3	104	0.068889	0.86055	0.994734	1.0686			2.5	0.769336
-9.2	123.8	0.067333	0.86263	1.00399	1.07838			3	0.761163
-9.1	44.6	0.032667	0.864876	1.01324	1.0881			3.5	0.781656
-9	87.2	0.048	0.867247	1.02245	1.09772			4	0.705147
-8.9	114.4	0.054667	0.869744	1.03164	1.10723			4.5	0.671923
-8.8	88	0.065556	0.872391	1.04079	1.11666			5	0.601224
-8.7	116.2	0.081556	0.875178	1.0499	1.12598			5.5	0.626747
-8.6	114.8	0.080222	0.878112	1.05896	1.1352			6	0.662067
-8.5	100.6	0.061111	0.881197	1.06797	1.14432			6.5	0.575757
-8.4	84.2	0.050222	0.884423	1.07691	1.15332			7	0.547037
-8.3	101	0.054889	0.887774	1.08578	1.16219			7.5	0.552556
-8.2	20.4	0.024222	0.891252	1.09458	1.17092			8	0.531762
-8.1	24.4	0.032	0.894815	1.1033	1.17948			8.5	0.563113
-8	58.2	0.050222	0.898441	1.11194	1.18784			9	0.548369
-7.9	122.4	0.068667	0.902147	1.12048	1.19601			9.5	0.616636
-7.8	68.8	0.055556	0.905974	1.12893	1.20402			10	0.643675
-7.7	63.6	0.044222	0.909908	1.13727	1.21187			10.5	0.636688
-7.6	102.4	0.066	0.913929	1.1455	1.21952			11	0.653129
-7.5	163	0.077111	0.918053	1.15361	1.227			11.5	0.858584
-7.4	173.4	0.087778	0.922322	1.16161	1.23432			12	0.786364
-7.3	63.2	0.040222	0.926754	1.16948	1.24151			12.5	0.831162
-7.2	81.2	0.052667	0.93129	1.17721	1.24851			13	0.958813
-7.1	82.6	0.051778	0.935904	1.18481	1.2553			13.5	1.07241
-7	49.6	0.047111	0.9406	1.19227	1.26188			14	0.981689
-6.9	70.2	0.072444	0.945357	1.19958	1.26823			14.5	1.0744
-6.8	120.4	0.078667	0.950174	1.20673	1.27435			15	1.17293
-6.7	141.4	0.077333	0.95508	1.21373	1.28026			15.5	1.11666
-6.6	168.4	0.082444	0.960098	1.22057	1.28598			16	1.21376
-6.5	140.2	0.073111	0.965244	1.22724	1.29151			16.5	1.25909
-6.4	132.2	0.062	0.970508	1.23374	1.29686			17	1.22342
-6.3	128.8	0.065556	0.975872	1.24006	1.30201			17.5	1.36264
-6.2	140.8	0.064444	0.98133	1.2462	1.30695			18	1.32877
-6.1	100.6	0.053111	0.986883	1.25216	1.31168			18.5	1.31607
-6	99.6	0.057556	0.992508	1.25793	1.31618			19	1.3569
-5.9	142.4	0.070444	0.998191	1.26351	1.32044			19.5	1.59923
-5.8	181.4	0.076889	1.00395	1.26889	1.32448			20	1.45132
-5.7	140	0.075778	1.00981	1.27407	1.32832			20.5	1.37329
-5.6	198.2	0.082444	1.01577	1.27904	1.33195			21	1.41816
-5.5	140.8	0.074222	1.02183	1.28381	1.33539			21.5	1.33686
-5.4	101.4	0.066222	1.02798	1.28837	1.33861			22	1.40396
-5.3	142	0.066667	1.03417	1.29272	1.34159			22.5	1.35757
-5.2	131.6	0.065556	1.04042	1.29685	1.34433			23	1.0798
-5.1	116.6	0.070222	1.04672	1.30076	1.34683			23.5	1.00015
-5	92.6	0.062889	1.05305	1.30445	1.34909			24	1.23178
-4.9	62.6	0.049778	1.05941	1.30792	1.35109			24.5	1.08941
-4.8	137.4	0.076667	1.06575	1.31116	1.35281			25	1.09552
-4.7	119.8	0.070667	1.07212	1.31418	1.35428			25.5	1.22228
-4.6	140.2	0.068889	1.07851	1.31696	1.3555			26	0.973485
-4.5	132.4	0.081556	1.08492	1.31951	1.35647			26.5	0.836674
-4.4	135.4	0.083556	1.09137	1.32183	1.35721			27	0.868621
-4.3	104.4	0.062889	1.09783	1.32391	1.3577			27.5	0.836161
-4.2	59.2	0.040222	1.10429	1.32575	1.35794			28	0.749465
-4.1	92.8	0.054222	1.11072	1.32736	1.3579			28.5	0.671703
-4	87.6	0.050667	1.11711	1.32873	1.35757			29	0.656498
-3.9	78.2	0.063778	1.12347	1.32986	1.35698			29.5	0.637631
-3.8	95	0.049333	1.12979	1.33075	1.35611			30	0.609736
-3.7	56.2	0.035778	1.13606	1.3314	1.35497			30.5	0.5285
-3.6	44.4	0.033778	1.14228	1.3318	1.35355			31	0.685169
-3.5	87.8	0.044444	1.14841	1.33197	1.35183			31.5	0.637444
-3.4	108.4	0.066	1.15448	1.33189	1.34984			32	0.579736
-3.3	115.4	0.066444	1.1605	1.33158	1.34759			32.5	0.635343
-3.2	169	0.083111	1.16649	1.33102	1.3451			33	0.700098
-3.1	157.8	0.089778	1.17246	1.33022	1.34238			33.5	0.642557
-3	97.2	0.070889	1.17843	1.32919	1.33946			34	0.657662
-2.9	76.2	0.052444	1.18435	1.32791	1.33631			34.5	0.74559
-2.8	124.6	0.065333	1.19019	1.3264	1.33289			35	0.722787
-2.7	59.8	0.041778	1.19597	1.32465	1.32924			35.5	0.909124
-2.6	74.2	0.049556	1.20167	1.32266	1.32533			36	0.78527
-2.5	122.6	0.063333	1.20727	1.32045	1.32117			36.5	0.903985
-2.4	116.4	0.064444	1.21279	1.318	1.31678			37	0.959866
-2.3	100.2	0.058889	1.21825	1.31532	1.31218			37.5	0.995151
-2.2	69.6	0.06	1.22363	1.31241	1.30735			38	1.10018
-2.1	111.2	0.071111	1.2289	1.30927	1.30228			38.5	1.08221
-2	118	0.058444	1.23409	1.30592	1.29699			39	1.0891
-1.9	59.6	0.049111	1.23919	1.30234	1.2915			39.5	1.11828
-1.8	75.6	0.052444	1.24418	1.29854	1.28579			40	1.15667
-1.7	38.4	0.040889	1.24905	1.29452	1.27985			40.5	1.14437
-1.6	22.4	0.022889	1.25377	1.2903	1.27367			41	1.10453
-1.5	43.8	0.037778	1.25834	1.28586	1.26725			41.5	1.28631
-1.4	98	0.062889	1.26274	1.28122	1.2606			42	1.26554
-1.3	109.2	0.069333	1.26702	1.27637	1.25374			42.5	1.28674
-1.2	119.4	0.070444	1.27119	1.27132	1.24671			43	1.25419
-1.1	116	0.078444	1.27527	1.26608	1.23951			43.5	1.34722
-1	128.2	0.085333	1.27924	1.26064	1.23215			44	1.4381
-0.9	156.2	0.087556	1.28312	1.25502	1.22465			44.5	1.23541
-0.8	115.2	0.066889	1.28692	1.24921	1.21702			45	1.14812
-0.7	62.6	0.055333	1.29062	1.24322	1.20925			45.5	1.35628
-0.6	16.8	0.022889	1.29418	1.23705	1.20133			46	1.08499
-0.5	36.6	0.039778	1.29756	1.23071	1.19321			46.5	1.16482
-0.4	23.2	0.020222	1.30075	1.22421	1.18492			47	1.17755
-0.3	13.2	0.016	1.30376	1.21754	1.17644			47.5	0.981435
-0.2	12.6	0.02	1.30657	1.21071	1.16779			48	0.951627
-0.1	22.2	0.021333	1.30918	1.20373	1.15896			48.5
0	12.8	0.019556	1.31159	1.1966	1.14996			49
0.1	11	0.015333	1.3138	1.18933	1.14081			49.5
0.2	11.2	0.014889	1.3158	1.18192	1.1315			50
0.3	18.6	0.030889	1.3176	1.17437	1.12203			50.5
0.4	113.8	0.064667	1.3192	1.1667	1.11244			51
0.5	130	0.066222	1.32065	1.1589	1.10275			51.5
0.6	128	0.071778	1.32198	1.15099	1.09301			52
0.7	161.8	0.078444	1.32321	1.14297	1.08323			52.5
0.8	133	0.081111	1.32434	1.13484	1.07344			53
0.9	112	0.073556	1.32537	1.12661	1.06363			53.5
1	94.4	0.080444	1.32628	1.11829	1.05379			54
1.1	183.6	0.080222	1.32706	1.10987	1.04392			54.5	0.737062
1.2	82.4	0.058	1.32775	1.10138	1.03406			55	0.678761
1.3	82.8	0.057778	1.32831	1.09281	1.02419			55.5	0.707852
1.4	36.8	0.050889	1.32872	1.08416	1.01431			56	0.813616
1.5	66.6	0.044222	1.32896	1.07546	1.00438			56.5	0.870002
1.6	99.8	0.057111	1.32903	1.06669	0.994438			57	0.883088
1.7	88.6	0.055333	1.32896	1.05787	0.984495			57.5	0.946002
1.8	124.6	0.060889	1.32874	1.049	0.974565			58	1.06958
1.9	87.6	0.042667	1.32841	1.04009	0.964671			58.5	0.95258
2	37.8	0.034667	1.32794	1.03115	0.954809			59	1.10253
2.1	35.6	0.044889	1.3273	1.02218	0.944957			59.5	1.176
2.2	24.8	0.032444	1.32648	1.01319	0.935109			60	1.09102
2.3	13.4	0.028	1.32547	1.00418	0.925267			60.5	1.28675
2.4	20.6	0.029333	1.32426	0.995162	0.915431			61	1.14892
2.5	36.2	0.031778	1.32286	0.986141	0.905607			61.5	1.11554
2.6	41	0.035111	1.32128	0.977123	0.895813			62	1.16462
2.7	29.2	0.027778	1.31952	0.968114	0.886062			62.5	1.24811
2.8	131.6	0.065556	1.31759	0.95912	0.876354			63	1.14185
2.9	113	0.064444	1.31554	0.950147	0.866743			63.5	1.1797
3	80.8	0.053111	1.31338	0.941202	0.857249			64	1.26297
3.1	121.6	0.068	1.3111	0.932291	0.847859			64.5	1.2416
3.2	77.2	0.047333	1.30872	0.92342	0.838593			65	1.29169
3.3	22.4	0.030444	1.30621	0.914595	0.829446			65.5	1.31705
3.4	26	0.031556	1.30354	0.905822	0.820389			66	1.27761
3.5	7.4	0.016667	1.30071	0.897107	0.811419			66.5	1.23267
3.6	24.2	0.028	1.29769	0.888457	0.802533			67	1.17568
3.7	56.6	0.038	1.29451	0.879876	0.793742			67.5	1.30339
3.8	81.4	0.058444	1.29118	0.871371	0.78507			68	1.29092
3.9	63.4	0.054	1.28773	0.862948	0.776542			68.5	1.16319
4	63.4	0.044	1.28416	0.854613	0.768163			69	1.243
4.1	12.4	0.016	1.28047	0.846371	0.759932			69.5	1.25884
4.2	17.4	0.019111	1.27662	0.838227	0.751834			70	1.24421
4.3	5.6	0.016667	1.27263	0.830188	0.743865			70.5	1.07161
4.4	18.4	0.020222	1.26847	0.822259	0.736026			71	0.959775
4.5	60.2	0.033333	1.26416	0.814446	0.728326			71.5	0.971341
4.6	61.2	0.034444	1.25973	0.806753	0.720792			72	1.11971
4.7	51.4	0.036222	1.25519	0.799186	0.71344			72.5	1.065
4.8	59.6	0.038444	1.25055	0.79175	0.70627			73	1.11283
4.9	31.6	0.026667	1.2458	0.78445	0.699289			73.5	1.0599
5	29.2	0.032667	1.24093	0.777291	0.69249			74	0.992862
5.1	39.8	0.035556	1.23595	0.770278	0.685872			74.5	0.941096
5.2	26	0.030889	1.23086	0.763416	0.679444			75	0.844369
5.3	19.4	0.024667	1.22566	0.756709	0.673205			75.5	0.818837
5.4	37	0.048444	1.22034	0.750163	0.667154			76	0.917121
5.5	40.4	0.051333	1.21492	0.74378	0.661301			76.5	0.936998
5.6	36.6	0.052444	1.2094	0.737567	0.655657			77	0.89716
5.7	47.8	0.046	1.2038	0.731526	0.650224			77.5	0.909213
5.8	41.4	0.033333	1.19811	0.725662	0.645011			78	0.883492
5.9	55.2	0.035778	1.19235	0.71998	0.64002			78.5	0.813684
6	40	0.034222	1.18652	0.714482	0.635259			79	0.789551
6.1	92.4	0.051556	1.18062	0.709172	0.630729			79.5	0.822061
6.2	110.4	0.050444	1.17468	0.704055	0.626452			80	0.855377
6.3	35	0.036222	1.16873	0.699133	0.622451			80.5	0.965239
6.4	17.4	0.019556	1.16273	0.69441	0.6187			81	0.915994
6.5	13	0.023556	1.15666	0.689889	0.615174			81.5	0.950373
6.6	30.6	0.031333	1.15052	0.685574	0.611871			82	0.951442
6.7	28	0.036667	1.14431	0.681466	0.6088			82.5	0.913383
6.8	30	0.038889	1.13805	0.677568	0.605966			83	0.914576
6.9	15.8	0.026	1.13175	0.673884	0.60337			83.5	0.876255
7	38.2	0.035556	1.12538	0.670416	0.601009			84	1.01604
7.1	32.4	0.025111	1.11898	0.667166	0.59889			84.5	1.00125
7.2	10.2	0.032667	1.11255	0.664135	0.597018			85	0.987104
7.3	14.4	0.027111	1.10607	0.661327	0.595383			85.5	1.1115
7.4	11	0.017333	1.09955	0.658743	0.593981			86	1.07051
7.5	57.8	0.042667	1.09299	0.656385	0.592814			86.5	1.16058
7.6	46	0.032444	1.08642	0.654254	0.591903			87	1.14002
7.7	35.8	0.04	1.07985	0.652351	0.591252			87.5	1.14191
7.8	49.4	0.037556	1.07328	0.650678	0.590856			88	1.23186
7.9	25.8	0.025111	1.06671	0.649236	0.590718			88.5	1.28784
8	25.6	0.022444	1.06014	0.648026	0.59083			89	1.27345
8.1	14.4	0.032667	1.05357	0.647048	0.591186			89.5	1.23746
8.2	44	0.041333	1.047	0.646304	0.591782			90	1.34206
8.3	57.8	0.051111	1.04044	0.645792	0.592626			90.5	1.18436
8.4	57	0.032444	1.03391	0.645515	0.593732			91	1.35547
8.5	66.4	0.030889	1.02742	0.645472	0.595101			91.5	1.34015
8.6	66.2	0.036	1.02097	0.645662	0.596736			92	1.13735
8.7	65.2	0.053333	1.01459	0.646086	0.598637			92.5	1.21221
8.8	62.4	0.051778	1.00826	0.646743	0.600802			93	1.32198
8.9	134.2	0.07	1.00199	0.647633	0.603229			93.5	1.36811
9	165.4	0.085556	0.99582	0.648755	0.605946			94	1.18613
9.1	148.2	0.085333	0.989795	0.650108	0.608982			94.5	1.30363
9.2	176.4	0.097333	0.983916	0.651691	0.612334			95	1.12883
9.3	164	0.09	0.978196	0.653503	0.616008			95.5	1.0563
9.4	96	0.048222	0.972639	0.655542	0.620001			96	1.16321
9.5	15	0.023556	0.967207	0.657808	0.624277
9.6	11.6	0.026667	0.961841	0.660298	0.62878
9.7	27.6	0.026222	0.956518	0.663011	0.633487
9.8	40.8	0.031333	0.95125	0.665944	0.6384
9.9	49.8	0.035333	0.946052	0.669097	0.643525
10	45	0.036	0.940935	0.672465	0.648866
10.1	95.8	0.073333	0.935902	0.676048	0.654418
10.2	140.2	0.092889	0.930983	0.679842	0.660199
10.3	148.6	0.095333	0.926219	0.683845	0.666236
10.4	47.8	0.042667	0.921628	0.688054	0.672538
10.5	27.4	0.031778	0.91716	0.692465	0.679057
10.6	54.6	0.052222	0.912779	0.697077	0.685756
10.7	98.2	0.057111	0.908496	0.701885	0.692636
10.8	119	0.053778	0.904346	0.706887	0.699719
10.9	128.4	0.065778	0.900352	0.712079	0.707019
11	142	0.080667	0.89653	0.717456	0.71454
11.1	97.4	0.076444	0.892889	0.723016	0.722283
11.2	63	0.043556	0.889412	0.728755	0.730225
11.3	40.6	0.044222	0.886068	0.734668	0.738336
11.4	36.2	0.042667	0.882837	0.740751	0.74659
11.5	28.4	0.036444	0.879713	0.747001	0.754976
11.6	89.4	0.061333	0.876691	0.753412	0.763481
11.7	122.2	0.068	0.873805	0.759981	0.772125
11.8	144.4	0.078	0.871091	0.766703	0.780931
11.9	83.2	0.052889	0.86857	0.773572	0.78991
12	127.2	0.058222	0.866217	0.780585	0.799032
12.1	103.4	0.057778	0.864039	0.787737	0.808296
12.2	127.2	0.072667	0.862036	0.795022	0.817694
12.3	112	0.070667	0.860215	0.802436	0.827226
12.4	133.4	0.069556	0.858576	0.809973	0.836882
12.5	91.4	0.070222	0.857125	0.817628	0.846662
12.6	74	0.047778	0.855847	0.825396	0.856543
12.7	19.4	0.034667	0.85472	0.833271	0.866501
12.8	100.8	0.075111	0.853709	0.841249	0.876501
12.9	153.8	0.097556	0.852845	0.849323	0.886558
13	92	0.068222	0.852178	0.857488	0.896709
13.1	87.4	0.049778	0.85169	0.865738	0.90693
13.2	83.2	0.052	0.85136	0.874068	0.917197
13.3	57.4	0.050667	0.851185	0.882472	0.927499
13.4	133	0.064	0.851149	0.890944	0.937817
13.5	141.2	0.069333	0.851285	0.899479	0.948171
13.6	164.4	0.075778	0.851618	0.908069	0.958574
13.7	109.8	0.050889	0.852163	0.91671	0.969032
13.8	89	0.046222	0.852895	0.925396	0.979516
13.9	158.4	0.087556	0.853785	0.93412	0.989998
14	212	0.094444	0.854866	0.942877	1.0005
14.1	171.8	0.079111	0.856185	0.951661	1.01104
14.2	146	0.075778	0.857731	0.960464	1.02163
14.3	130.2	0.064889	0.85948	0.969283	1.03221
14.4	155.2	0.075778	0.861412	0.978109	1.04279
14.5	169.4	0.086444	0.863535	0.986938	1.05334
14.6	168.2	0.081556	0.865863	0.995764	1.06389
14.7	107.6	0.057111	0.868395	1.00458	1.07443
14.8	85.6	0.043333	0.871097	1.01338	1.08491
14.9	63.8	0.043111	0.873937	1.02216	1.09531
15	143.2	0.071778	0.876895	1.03091	1.1056
15.1	108.6	0.074667	0.880005	1.03962	1.11582
15.2	118.2	0.061556	0.88327	1.0483	1.12594
15.3	124.2	0.073333	0.886681	1.05693	1.13598
15.4	97.4	0.069556	0.890241	1.06551	1.14591
15.5	155.4	0.083111	0.893936	1.07403	1.15572
15.6	153.2	0.078222	0.897787	1.08249	1.16543
15.7	120.2	0.064	0.901805	1.09087	1.17504
15.8	122.2	0.072222	0.905968	1.09919	1.18453
15.9	139.2	0.066222	0.910266	1.10742	1.19388
16	137.6	0.071333	0.914706	1.11557	1.2031
16.1	123.8	0.067556	0.919287	1.12362	1.21218
16.2	92	0.046222	0.923998	1.13158	1.22111
16.3	98.2	0.053111	0.928815	1.13943	1.22987
16.4	126	0.074	0.933729	1.14718	1.23844
16.5	127.8	0.064667	0.938754	1.15481	1.24683
16.6	143	0.074	0.943894	1.16233	1.25505
16.7	159.6	0.091333	0.949154	1.16972	1.26309
16.8	190.8	0.088	0.954545	1.17698	1.27096
16.9	180.6	0.092667	0.960084	1.1841	1.27868
17	120.8	0.072	0.965771	1.19109	1.28624
17.1	137.4	0.070444	0.971564	1.19794	1.29359
17.2	102.2	0.062	0.977454	1.20463	1.30075
17.3	124.6	0.065556	0.98342	1.21118	1.30768
17.4	149.2	0.066	0.989463	1.21757	1.31438
17.5	112.4	0.069111	0.995597	1.22379	1.32087
17.6	146.2	0.064	1.00181	1.22985	1.32712
17.7	153.6	0.072667	1.00809	1.23574	1.33315
17.8	101.4	0.057111	1.01446	1.24146	1.33896
17.9	113.6	0.062222	1.02089	1.247	1.34452
18	135.4	0.064444	1.02737	1.25235	1.34982
18.1	66	0.031111	1.0339	1.25753	1.35487
18.2	49.8	0.039333	1.04044	1.26251	1.35964
18.3	69.4	0.050889	1.04698	1.2673	1.36411
18.4	56	0.046222	1.0535	1.2719	1.36828
18.5	60.6	0.064444	1.06001	1.27629	1.37213
18.6	85.4	0.052	1.06649	1.28049	1.37568
18.7	163	0.088889	1.07297	1.28448	1.37893
18.8	143.6	0.069111	1.07948	1.28826	1.38191
18.9	80.6	0.049556	1.08603	1.29184	1.38464
19	107	0.053778	1.09257	1.2952	1.38708
19.1	119.4	0.048667	1.0991	1.29835	1.38922
19.2	89.6	0.053778	1.10564	1.30128	1.39108
19.3	91	0.047556	1.11216	1.304	1.39265
19.4	94.4	0.048667	1.11864	1.30649	1.39391
19.5	120.8	0.065333	1.1251	1.30876	1.39488
19.6	119.8	0.067778	1.13154	1.31081	1.39555
19.7	111.4	0.066222	1.13796	1.31264	1.39594
19.8	83.2	0.045556	1.14436	1.31423	1.39604
19.9	60.8	0.043333	1.15071	1.3156	1.39584
20	100.8	0.050889	1.15699	1.31675	1.39533
20.1	136.8	0.067778	1.16321	1.31766	1.39451
20.2	124.4	0.065111	1.1694	1.31835	1.39341
20.3	114.8	0.066889	1.17555	1.3188	1.39203
20.4	106.4	0.071778	1.18166	1.31903	1.39038
20.5	106.2	0.070444	1.18772	1.31902	1.38844
20.6	115.2	0.058444	1.19371	1.31879	1.38621
20.7	90.4	0.046444	1.19965	1.31832	1.38371
20.8	20.4	0.026889	1.20551	1.31763	1.38092
20.9	50.6	0.034	1.21124	1.3167	1.37781
21	65.2	0.048222	1.21684	1.31555	1.37438
21.1	50	0.046444	1.22233	1.31417	1.37064
21.2	83.6	0.053111	1.2277	1.31256	1.3666
21.3	123.2	0.071556	1.23295	1.31073	1.36227
21.4	122	0.070222	1.23812	1.30868	1.35768
21.5	130.2	0.066667	1.24321	1.3064	1.35284
21.6	118.2	0.064	1.24823	1.3039	1.34776
21.7	157.2	0.072889	1.25316	1.30118	1.34244
21.8	173.8	0.085111	1.25803	1.29824	1.3369
21.9	129.4	0.063111	1.26284	1.29509	1.33115
22	127.6	0.058889	1.26759	1.29172	1.32519
22.1	110.8	0.051556	1.27224	1.28814	1.31902
22.2	55.4	0.037778	1.27679	1.28436	1.31262
22.3	29.8	0.026444	1.2812	1.28037	1.30597
22.4	6.6	0.02	1.28544	1.27617	1.29906
22.5	7	0.024889	1.2895	1.27178	1.29187
22.6	7.2	0.018667	1.29334	1.26718	1.2844
22.7	24.8	0.032	1.29699	1.2624	1.27666
22.8	32.6	0.032889	1.30045	1.25742	1.26867
22.9	15.2	0.032889	1.30371	1.25225	1.26044
23	37.8	0.028444	1.30679	1.24691	1.25196
23.1	64.6	0.039778	1.30967	1.24138	1.24326
23.2	71.2	0.039778	1.31239	1.23567	1.23435
23.3	92.8	0.055111	1.31495	1.22979	1.22525
23.4	83.2	0.067333	1.31736	1.22375	1.21598
23.5	95	0.069778	1.31962	1.21754	1.20654
23.6	65.8	0.06	1.32174	1.21117	1.19695
23.7	81	0.061111	1.32371	1.20464	1.18721
23.8	82.4	0.06	1.32551	1.19797	1.17732
23.9	67.8	0.053778	1.32717	1.19114	1.16728
24	61.4	0.05	1.32866	1.18418	1.15712
24.1	48.6	0.047556	1.32998	1.17708	1.14682
24.2	46.8	0.038889	1.33113	1.16984	1.13638
24.3	19	0.034889	1.33209	1.16248	1.12582
24.4	45.2	0.028	1.33286	1.155	1.11512
24.5	58.6	0.034444	1.33343	1.1474	1.10429
24.6	51	0.026889	1.33383	1.13969	1.09337
24.7	28.2	0.040222	1.33405	1.13187	1.08235
24.8	22.8	0.033333	1.33408	1.12395	1.07124
24.9	70.4	0.069778	1.33391	1.11593	1.06003
25	104.8	0.074444	1.33356	1.10783	1.04875
25.1	115.6	0.072889	1.33308	1.09963	1.03744
25.2	143.2	0.07	1.33247	1.09137	1.02612
25.3	105.2	0.067333	1.33175	1.08302	1.01481
25.4	93.4	0.054444	1.33092	1.07461	1.00351
25.5	59	0.034	1.32995	1.06614	0.992213
25.6	49.4	0.035778	1.32883	1.05761	0.980908
25.7	43	0.035556	1.32753	1.04903	0.969594
25.8	47.8	0.032	1.32607	1.04041	0.958272
25.9	41.6	0.030667	1.32443	1.03175	0.946953
26	45.2	0.031333	1.32262	1.02306	0.935642
26.1	64.2	0.032889	1.32065	1.01434	0.924349
26.2	55	0.039556	1.31851	1.0056	0.913091
26.3	50.2	0.047111	1.31622	0.996845	0.901876
26.4	35	0.042667	1.31378	0.988082	0.890709
26.5	75.6	0.049556	1.31117	0.979317	0.87959
26.6	102.6	0.054	1.30841	0.970555	0.868542
26.7	68.4	0.044222	1.30554	0.961803	0.857595
26.8	111.2	0.066444	1.30254	0.953066	0.846747
26.9	71	0.076667	1.29944	0.944351	0.836017
27	63	0.053778	1.29621	0.935664	0.825406
27.1	60.6	0.052444	1.29286	0.92701	0.814908
27.2	75.4	0.052222	1.28938	0.918395	0.804527
27.3	46.8	0.035111	1.28577	0.909826	0.794278
27.4	84.6	0.048667	1.28204	0.901308	0.784158
27.5	75.8	0.043778	1.27819	0.892848	0.774185
27.6	88.4	0.054	1.27423	0.88445	0.764372
27.7	56.6	0.031111	1.27018	0.876121	0.754728
27.8	54.8	0.043111	1.26602	0.867866	0.74525
27.9	88.6	0.052222	1.26174	0.859692	0.735936
28	63.6	0.037556	1.25737	0.851603	0.726807
28.1	51.2	0.035111	1.2529	0.843605	0.717867
28.2	38.6	0.034667	1.24832	0.835704	0.709111
28.3	81.4	0.048222	1.24363	0.827905	0.700536
28.4	79.2	0.05	1.23885	0.820214	0.692166
28.5	75.2	0.057111	1.23399	0.812635	0.684014
28.6	65.2	0.038222	1.22906	0.805175	0.676084
28.7	11.8	0.027556	1.22405	0.797838	0.668377
28.8	33.8	0.039556	1.21892	0.790628	0.660871
28.9	49.6	0.038222	1.2137	0.783552	0.65357
29	56.2	0.042889	1.20838	0.776614	0.646491
29.1	70.6	0.05	1.20299	0.769819	0.639645
29.2	101	0.066889	1.19753	0.763171	0.633046
29.3	80.8	0.056222	1.19203	0.756675	0.626715
29.4	61.8	0.050889	1.1865	0.750336	0.620654
29.5	44	0.039111	1.18091	0.744158	0.614854
29.6	36.8	0.030889	1.17526	0.738144	0.609306
29.7	16.6	0.02	1.16955	0.7323	0.604008
29.8	53.4	0.037333	1.16376	0.726629	0.598952
29.9	31.6	0.033111	1.15791	0.721136	0.594153
30	13.6	0.027333	1.152	0.715823	0.589614
30.1	9.2	0.017333	1.14603	0.710695	0.585325
30.2	36.4	0.030444	1.13999	0.705755	0.581281
30.3	26.4	0.040889	1.13389	0.701006	0.577498
30.4	61.4	0.061111	1.12774	0.696453	0.573979
30.5	80	0.074889	1.12157	0.692097	0.570741
30.6	100.8	0.070444	1.1154	0.687943	0.567801
30.7	86.4	0.05	1.10924	0.683992	0.565176
30.8	69.8	0.037333	1.1031	0.680248	0.562865
30.9	54.8	0.043556	1.09697	0.676713	0.560859
31	46.6	0.038889	1.09084	0.67339	0.559148
31.1	55.4	0.030667	1.08471	0.670281	0.557725
31.2	50.8	0.035333	1.07858	0.667388	0.556595
31.3	80.2	0.041111	1.07245	0.664713	0.555758
31.4	115	0.052667	1.06636	0.662258	0.555225
31.5	53.8	0.04	1.06031	0.660024	0.55502
31.6	78.2	0.052	1.0543	0.658014	0.555122
31.7	46.8	0.036889	1.04833	0.656228	0.555528
31.8	64.2	0.048	1.04239	0.654669	0.556229
31.9	122	0.068222	1.03648	0.653336	0.557225
32	117	0.066	1.03064	0.652232	0.558545
32.1	84	0.062	1.02489	0.651356	0.560198
32.2	90	0.063333	1.01921	0.650709	0.562166
32.3	110.8	0.060667	1.01361	0.650292	0.564444
32.4	139.4	0.072667	1.00809	0.650106	0.567039
32.5	156.6	0.082667	1.00269	0.65015	0.569968
32.6	141.8	0.071778	0.997419	0.650424	0.573242
32.7	145.6	0.070889	0.992279	0.650928	0.576855
32.8	90.6	0.066222	0.987272	0.651662	0.580802
32.9	99.6	0.049333	0.98237	0.652625	0.585056
33	63	0.039556	0.977567	0.653817	0.589606
33.1	73.6	0.052667	0.972848	0.655237	0.594433
33.2	130.4	0.068222	0.96821	0.656884	0.599529
33.3	144.8	0.066889	0.963692	0.658757	0.604918
33.4	97.8	0.055778	0.959317	0.660855	0.610616
33.5	57.6	0.044444	0.955068	0.663176	0.6166
33.6	47.2	0.048222	0.950912	0.665718	0.622837
33.7	80.4	0.056889	0.946833	0.668481	0.629307
33.8	140.8	0.080444	0.942849	0.671461	0.636018
33.9	125.6	0.087333	0.939005	0.674658	0.642999
34	73	0.067778	0.935312	0.678068	0.650253
34.1	112.2	0.062889	0.931737	0.681691	0.657746
34.2	127.6	0.073333	0.928289	0.685522	0.665478
34.3	131	0.066222	0.924991	0.68956	0.673459
34.4	87.4	0.065111	0.921848	0.693802	0.681687
34.5	57.6	0.034889	0.91884	0.698244	0.690138
34.6	37.4	0.032444	0.91594	0.702885	0.698781
34.7	48.6	0.034889	0.91313	0.70772	0.707594
34.8	56.6	0.033556	0.910411	0.712747	0.716571
34.9	102.6	0.052889	0.907793	0.717961	0.72571
35	113.4	0.062444	0.905305	0.723361	0.735027
35.1	114	0.063556	0.902966	0.728941	0.744532
35.2	98.2	0.065556	0.90078	0.734698	0.754219
35.3	80.6	0.055333	0.89874	0.740628	0.764073
35.4	40.2	0.034	0.896832	0.746727	0.774076
35.5	31	0.038667	0.895031	0.752991	0.784198
35.6	21.8	0.043556	0.89332	0.759416	0.794418
35.7	57.8	0.045333	0.891693	0.765996	0.804721
35.8	77.6	0.06	0.890167	0.772729	0.815115
35.9	96.2	0.045333	0.888766	0.779609	0.825609
36	130	0.074222	0.887503	0.786631	0.836207
36.1	95.8	0.057111	0.886403	0.79379	0.846922
36.2	65.2	0.052667	0.885458	0.801082	0.857738
36.3	125.4	0.085333	0.88464	0.808502	0.868623
36.4	122.4	0.074444	0.883975	0.816045	0.879592
36.5	80.8	0.050444	0.883477	0.823705	0.890648
36.6	97.8	0.061556	0.883122	0.831477	0.901763
36.7	126.4	0.071778	0.882908	0.839356	0.912927
36.8	91.2	0.059333	0.882854	0.847337	0.924149
36.9	85.2	0.055556	0.88295	0.855413	0.93541
37	115	0.067333	0.883181	0.863581	0.946693
37.1	78.6	0.053556	0.883561	0.871833	0.957999
37.2	120.8	0.064444	0.884078	0.880164	0.969312
37.3	119.2	0.062667	0.884745	0.888568	0.980634
37.4	165.8	0.080444	0.88557	0.897041	0.991965
37.5	114.2	0.074444	0.886578	0.905575	1.00332
37.6	164.2	0.089111	0.887752	0.914165	1.01467
37.7	167.8	0.093556	0.889104	0.922806	1.02603
37.8	104.8	0.058222	0.890649	0.931491	1.03739
37.9	135	0.068889	0.892351	0.940214	1.04872
38	115	0.064889	0.894207	0.948969	1.06002
38.1	90.6	0.052	0.896214	0.95775	1.07127
38.2	105.2	0.052222	0.898351	0.966552	1.08245
38.3	94.4	0.056222	0.900616	0.975368	1.09355
38.4	136.8	0.079556	0.903007	0.984191	1.10455
38.5	118	0.062222	0.905541	0.993017	1.11548
38.6	122.2	0.068667	0.908219	1.00184	1.12633
38.7	186.8	0.089556	0.911034	1.01065	1.13707
38.8	161.2	0.067778	0.914021	1.01945	1.14774
38.9	146.6	0.068444	0.917182	1.02822	1.15833
39	123.8	0.069333	0.920499	1.03696	1.16882
39.1	179.4	0.087111	0.923952	1.04567	1.17919
39.2	188	0.082222	0.927563	1.05434	1.18945
39.3	139.8	0.074667	0.93135	1.06297	1.19961
39.4	151.4	0.084667	0.935285	1.07154	1.20964
39.5	144.6	0.071111	0.939358	1.08005	1.21953
39.6	120.6	0.072889	0.943567	1.0885	1.22928
39.7	155	0.075556	0.947891	1.09688	1.23886
39.8	129.4	0.067778	0.952342	1.10518	1.24827
39.9	124.4	0.064	0.95691	1.1134	1.25751
40	55.2	0.048444	0.961583	1.12154	1.26656
40.1	45	0.031556	0.966318	1.12958	1.27538
40.2	64.2	0.052444	0.971088	1.13752	1.28395
40.3	116	0.067556	0.975897	1.14536	1.29226
40.4	115.2	0.064444	0.980775	1.15309	1.30034
40.5	107.6	0.060889	0.985733	1.16071	1.3082
40.6	75.4	0.040889	0.990763	1.1682	1.31581
40.7	72	0.038667	0.995842	1.17557	1.32317
40.8	155.6	0.061333	1.00096	1.18281	1.33026
40.9	102.4	0.054667	1.00615	1.18992	1.33711
41	102.8	0.053111	1.01141	1.19688	1.34371
41.1	140.4	0.071778	1.01671	1.2037	1.35004
41.2	175.4	0.082	1.02208	1.21037	1.35612
41.3	101.6	0.056	1.02755	1.21689	1.36197
41.4	93.8	0.064667	1.03307	1.22324	1.36755
41.5	75.4	0.051778	1.03862	1.22944	1.37285
41.6	83	0.048444	1.04419	1.23546	1.37785
41.7	111.8	0.059333	1.04976	1.24131	1.38254
41.8	78	0.046222	1.05536	1.24699	1.38694
41.9	44.6	0.042667	1.06096	1.25249	1.39104
42	96.6	0.069333	1.06654	1.2578	1.3948
42.1	81	0.054	1.07212	1.26293	1.39825
42.2	120.8	0.067556	1.0777	1.26786	1.40139
42.3	111.4	0.063778	1.08328	1.2726	1.40423
42.4	49.6	0.061111	1.08887	1.27715	1.40676
42.5	70.6	0.059111	1.09444	1.28149	1.40897
42.6	146.6	0.076222	1.09997	1.28562	1.41084
42.7	163.2	0.078444	1.10551	1.28955	1.41242
42.8	116.4	0.069556	1.11109	1.29327	1.41372
42.9	126.2	0.068	1.11667	1.29678	1.41473
43	134	0.070667	1.12225	1.30007	1.41544
43.1	108	0.052	1.12783	1.30315	1.41586
43.2	123.4	0.067556	1.1334	1.306	1.41599
43.3	129.6	0.069778	1.13895	1.30864	1.4158
43.4	108	0.071333	1.14449	1.31105	1.41533
43.5	124.2	0.071111	1.15001	1.31323	1.41455
43.6	118.8	0.092889	1.1555	1.31519	1.41348
43.7	124.2	0.081333	1.16096	1.31692	1.4121
43.8	139.4	0.080667	1.16639	1.31842	1.41044
43.9	145.4	0.081333	1.1718	1.31969	1.40849
44	104.8	0.051556	1.17719	1.32073	1.40627
44.1	99.6	0.060222	1.18254	1.32154	1.40376
44.2	92.6	0.049778	1.18783	1.32211	1.40094
44.3	138.4	0.065556	1.19305	1.32245	1.39783
44.4	104	0.063111	1.19822	1.32256	1.39443
44.5	71.6	0.066444	1.20333	1.32243	1.39075
44.6	52.8	0.067111	1.20836	1.32207	1.38678
44.7	77.4	0.069111	1.21327	1.32148	1.38248
44.8	137.6	0.076	1.21809	1.32065	1.37789
44.9	141.8	0.1	1.22283	1.31959	1.37302
45	194.4	0.1	1.22752	1.31829	1.36791
45.1	187.6	0.086889	1.23219	1.31677	1.36258
45.2	108.2	0.06	1.23685	1.31501	1.35704
45.3	116.2	0.065333	1.24144	1.31303	1.35127
45.4	128.2	0.070667	1.24594	1.31082	1.34525
45.5	89.4	0.046667	1.25037	1.30838	1.33898
45.6	93.2	0.054222	1.2547	1.30571	1.33248
45.7	74	0.043111	1.25892	1.30283	1.32572
45.8	53.2	0.031333	1.26302	1.29972	1.31872
45.9	48.4	0.031111	1.26698	1.29639	1.31145
46	93	0.048222	1.27079	1.29285	1.30392
46.1	85.2	0.058	1.27447	1.28909	1.29616
46.2	121.4	0.078222	1.27802	1.28512	1.28818
46.3	130.4	0.084	1.28147	1.28094	1.27999
46.4	153.8	0.091556	1.28483	1.27655	1.27162
46.5	122.8	0.083778	1.28811	1.27196	1.26308
46.6	56	0.044222	1.29129	1.26717	1.25438
46.7	67	0.045333	1.29433	1.26218	1.24548
46.8	70.4	0.046667	1.29722	1.257	1.23638
46.9	74.4	0.053778	1.29996	1.25163	1.22709
47	64.4	0.043111	1.30256	1.24607	1.21762
47.1	47.2	0.031333	1.305	1.24033	1.20797
47.2	60.6	0.037778	1.30727	1.23441	1.19815
47.3	71.2	0.043556	1.30938	1.22831	1.18815
47.4	58.2	0.032889	1.31133	1.22204	1.17801
47.5	103.2	0.053111	1.31313	1.21561	1.16771
47.6	93	0.054	1.31478	1.20901	1.15728
47.7	90.2	0.048444	1.3163	1.20226	1.14675
47.8	43.8	0.031111	1.31768	1.19536	1.13611
47.9	12.4	0.028	1.31889	1.1883	1.12535
48	181.862	0.1	1.31991	1.1811	1.11445
48.1	181.862	0.1	1.32082	1.17377	1.10349
48.2	181.862	0.1	1.32166	1.1663	1.09252
48.3	181.862	0.1	1.32244	1.1587	1.08155
48.4	181.862	0.1	1.32316	1.15098	1.07058
48.5	181.862	0.1	1.3238	1.14314	1.05962
48.6	181.862	0.1	1.32439	1.13518	1.04869
48.7	181.862	0.1	1.3249	1.12712	1.03777
48.8	181.862	0.1	1.32536	1.11896	1.0269
48.9	181.862	0.1	1.32574	1.11071	1.01607
49	181.862	0.1	1.32606	1.10236	1.00529
49.1	181.862	0.1	1.32632	1.09393	0.994574
49.2	181.862	0.1	1.32651	1.08542	0.983923
49.3	181.862	0.1	1.32663	1.07683	0.973347
49.4	181.862	0.1	1.32669	1.06818	0.962853
49.5	181.862	0.1	1.32668	1.05947	0.95245
49.6	181.862	0.1	1.32661	1.05071	0.942145
49.7	181.862	0.1	1.32647	1.04189	0.931945
49.8	181.862	0.1	1.32627	1.03303	0.921858
49.9	181.862	0.1	1.32601	1.02414	0.91189
50	181.862	0.1	1.32568	1.01522	0.902049
50.1	181.862	0.1	1.32529	1.00627	0.892342
50.2	181.862	0.1	1.32483	0.997299	0.882775
50.3	181.862	0.1	1.32432	0.98832	0.873356
50.4	181.862	0.1	1.32374	0.979335	0.864091
50.5	181.862	0.1	1.3231	0.970351	0.854987
50.6	181.862	0.1	1.3224	0.961373	0.84605
50.7	181.862	0.1	1.32164	0.952408	0.837286
50.8	181.862	0.1	1.32083	0.943462	0.828701
50.9	181.862	0.1	1.31995	0.934542	0.820301
51	181.862	0.1	1.31902	0.925653	0.812093
51.1	181.862	0.1	1.31803	0.916802	0.804081
51.2	181.862	0.1	1.31698	0.907995	0.796272
51.3	181.862	0.1	1.31588	0.899238	0.78867
51.4	181.862	0.1	1.31472	0.890537	0.78128
51.5	181.862	0.1	1.31351	0.881898	0.774109
51.6	181.862	0.1	1.31225	0.873327	0.76716
51.7	181.862	0.1	1.31094	0.86483	0.760438
51.8	181.862	0.1	1.30957	0.856414	0.753948
51.9	181.862	0.1	1.30816	0.848083	0.747694
52	181.862	0.1	1.3067	0.839844	0.741681
52.1	181.862	0.1	1.30519	0.831703	0.735911
52.2	181.862	0.1	1.30364	0.823665	0.730389
52.3	181.862	0.1	1.30204	0.815736	0.725118
52.4	181.862	0.1	1.3004	0.807921	0.720102
52.5	181.862	0.1	1.29871	0.800226	0.715344
52.6	181.862	0.1	1.29698	0.792656	0.710847
52.7	181.862	0.1	1.29522	0.785217	0.706613
52.8	181.862	0.1	1.29341	0.777913	0.702646
52.9	181.862	0.1	1.29157	0.77075	0.698947
53	181.862	0.1	1.28969	0.763733	0.695519
53.1	181.862	0.1	1.28777	0.756867	0.692364
53.2	181.862	0.1	1.28583	0.750157	0.689483
53.3	181.862	0.1	1.28385	0.743607	0.686877
53.4	181.862	0.1	1.28184	0.737222	0.68455
53.5	181.862	0.1	1.2798	0.731007	0.6825
53.6	181.862	0.1	1.27773	0.724965	0.680731
53.7	181.862	0.1	1.27563	0.719102	0.679241
53.8	181.862	0.1	1.27351	0.713421	0.678032
53.9	181.862	0.1	1.27136	0.707926	0.677103
54	181.862	0.1	1.2692	0.702622	0.676456
54.1	116.8	0.099556	1.26701	0.697511	0.67609
54.2	96.4	0.067111	1.26476	0.692598	0.675975
54.3	46.4	0.034	1.26244	0.687886	0.676087
54.4	10.4	0.011111	1.26	0.683379	0.676397
54.5	7.4	0.011333	1.25741	0.679079	0.676878
54.6	5	0.010222	1.25467	0.67499	0.677519
54.7	8.8	0.009778	1.25177	0.671115	0.678318
54.8	5.8	0.008444	1.24872	0.667457	0.679274
54.9	16.8	0.012222	1.24552	0.664017	0.680387
55	9.8	0.009556	1.24219	0.660799	0.681659
55.1	14.4	0.012	1.23871	0.657805	0.683089
55.2	16	0.030667	1.23509	0.655037	0.684676
55.3	6.6	0.014889	1.23134	0.652498	0.68642
55.4	14.8	0.026889	1.22746	0.650188	0.688316
55.5	65.8	0.056	1.22345	0.64811	0.690363
55.6	102.8	0.075111	1.21935	0.646265	0.692585
55.7	75.4	0.061333	1.21519	0.644655	0.695008
55.8	55.4	0.039333	1.21096	0.643281	0.697626
55.9	20.2	0.019333	1.20667	0.642143	0.700422
56	5.8	0.012222	1.20227	0.641244	0.703373
56.1	3	0.008222	1.19776	0.640583	0.706462
56.2	13	0.017333	1.19314	0.640161	0.709682
56.3	5.8	0.010444	1.18841	0.639979	0.713035
56.4	7.6	0.012222	1.18357	0.640036	0.716516
56.5	13.4	0.016444	1.17864	0.640333	0.720123
56.6	48.2	0.029778	1.17361	0.64087	0.723856
56.7	27.4	0.032444	1.16851	0.641647	0.727729
56.8	5.6	0.023556	1.16334	0.642662	0.731737
56.9	13.6	0.013778	1.15808	0.643916	0.735863
57	47.2	0.029333	1.15275	0.645407	0.740103
57.1	63.2	0.028	1.14736	0.647135	0.74447
57.2	34.4	0.034222	1.14193	0.649099	0.748976
57.3	25	0.032667	1.13646	0.651297	0.753609
57.4	9.4	0.036889	1.13094	0.653728	0.758354
57.5	37.6	0.051778	1.12536	0.656391	0.763198
57.6	95.6	0.072889	1.11973	0.659283	0.768148
57.7	122	0.068	1.1141	0.662402	0.773232
57.8	84.6	0.058667	1.1085	0.665747	0.778472
57.9	23.8	0.029333	1.10293	0.669316	0.783852
58	10	0.017333	1.09734	0.673106	0.789334
58.1	6.8	0.012222	1.0917	0.677114	0.794893
58.2	2	0.016889	1.08603	0.681337	0.80052
58.3	12.4	0.015778	1.08032	0.685774	0.806209
58.4	15.8	0.039111	1.07458	0.690421	0.811959
58.5	27.6	0.047111	1.06881	0.695274	0.817771
58.6	63.2	0.063333	1.06303	0.700331	0.823645
58.7	120.6	0.071556	1.05726	0.705588	0.829598
58.8	95.8	0.077778	1.05155	0.711042	0.835658
58.9	84.2	0.061111	1.0459	0.716688	0.841823
59	124	0.056444	1.04031	0.722523	0.848079
59.1	51	0.031111	1.0348	0.728543	0.854436
59.2	33.2	0.034889	1.02934	0.734744	0.860865
59.3	34	0.028	1.02389	0.741122	0.867338
59.4	8.6	0.012889	1.01848	0.747672	0.873845
59.5	35	0.029333	1.01307	0.754389	0.880373
59.6	37.4	0.030889	1.00769	0.76127	0.886921
59.7	51	0.043333	1.00234	0.768309	0.893493
59.8	76.2	0.055556	0.99704	0.775502	0.900091
59.9	93.4	0.050444	0.991806	0.782844	0.906725
60	76.8	0.044	0.986658	0.790329	0.913404
60.1	100.2	0.066444	0.981595	0.797952	0.920119
60.2	96.4	0.076889	0.976628	0.805709	0.926873
60.3	81.2	0.062889	0.971765	0.813594	0.933666
60.4	67.2	0.048222	0.966998	0.821601	0.940483
60.5	102.8	0.050667	0.962318	0.829725	0.947311
60.6	68.6	0.056	0.957744	0.83796	0.954159
60.7	83.8	0.049111	0.95327	0.846301	0.961014
60.8	120.6	0.066889	0.948895	0.854741	0.96787
60.9	104.8	0.064667	0.944648	0.863276	0.974743
61	106.8	0.064667	0.940532	0.871898	0.98163
61.1	98	0.066889	0.936546	0.880603	0.988523
61.2	62	0.046222	0.932688	0.889384	0.995413
61.3	97.6	0.048667	0.928937	0.898235	1.00228
61.4	134.4	0.081333	0.925304	0.907149	1.00912
61.5	86.4	0.061778	0.921823	0.916122	1.01597
61.6	130.8	0.076667	0.918478	0.925145	1.02279
61.7	108.4	0.072667	0.915282	0.934214	1.02959
61.8	159.2	0.095778	0.912236	0.943321	1.03638
61.9	143.2	0.076222	0.909364	0.952462	1.04316
62	66.2	0.043556	0.906672	0.961628	1.04994
62.1	112	0.051333	0.904114	0.970814	1.05666
62.2	91.4	0.052889	0.901696	0.980013	1.06333
62.3	63.6	0.045111	0.899419	0.989219	1.06995
62.4	38	0.032	0.897264	0.998426	1.07649
62.5	60	0.057333	0.895209	1.00763	1.08293
62.6	94.8	0.058667	0.893262	1.01682	1.08927
62.7	121.6	0.078222	0.891447	1.02598	1.09553
62.8	152.6	0.080444	0.88979	1.03513	1.10173
62.9	88.6	0.050222	0.888315	1.04424	1.10787
63	133.4	0.063111	0.886997	1.05332	1.11393
63.1	70.2	0.049556	0.885843	1.06235	1.11993
63.2	135.2	0.065778	0.88483	1.07133	1.12582
63.3	188.6	0.090444	0.883976	1.08025	1.13163
63.4	147.6	0.078444	0.88333	1.08911	1.13738
63.5	98.8	0.060444	0.882882	1.0979	1.14308
63.6	91.4	0.063333	0.882595	1.10661	1.14867
63.7	115.6	0.066222	0.88245	1.11525	1.15416
63.8	105.2	0.070222	0.882458	1.12379	1.15953
63.9	137	0.072222	0.882619	1.13224	1.16479
64	147.8	0.076222	0.882949	1.14059	1.16994
64.1	124.2	0.070667	0.883459	1.14884	1.175
64.2	121.6	0.062667	0.88414	1.15698	1.17996
64.3	111.4	0.06	0.884983	1.16499	1.1848
64.4	110	0.053778	0.88598	1.17289	1.18951
64.5	124.4	0.066889	0.887126	1.18065	1.19409
64.6	78.4	0.050889	0.888427	1.18828	1.19854
64.7	93.4	0.048889	0.889862	1.19578	1.20284
64.8	113.2	0.071111	0.891423	1.20312	1.20699
64.9	124	0.081556	0.893126	1.21032	1.211
65	102.2	0.056889	0.894978	1.21737	1.21486
65.1	126.8	0.067111	0.896971	1.22425	1.21857
65.2	102.2	0.045333	0.899109	1.23097	1.22215
65.3	99.6	0.055333	0.901384	1.23752	1.22556
65.4	119.6	0.047333	0.903786	1.24389	1.22882
65.5	95.4	0.046889	0.906323	1.25009	1.23192
65.6	114.2	0.057333	0.908985	1.2561	1.23486
65.7	130.8	0.074889	0.911774	1.26192	1.23763
65.8	106.8	0.055111	0.914702	1.26756	1.24025
65.9	85.6	0.053111	0.917757	1.273	1.24271
66	89	0.052444	0.920921	1.27824	1.24499
66.1	46.8	0.055778	0.924185	1.28327	1.24708
66.2	70.4	0.047778	0.927525	1.2881	1.24898
66.3	91	0.048889	0.930941	1.29272	1.25067
66.4	75	0.048	0.934447	1.29712	1.25217
66.5	92	0.052889	0.938039	1.3013	1.25348
66.6	62.6	0.048667	0.941718	1.30527	1.2546
66.7	63	0.049333	0.94547	1.30902	1.25552
66.8	90.8	0.054	0.949285	1.31253	1.25623
66.9	50.6	0.043556	0.953176	1.31582	1.25676
67	71.8	0.066444	0.957125	1.31888	1.25707
67.1	91	0.050222	0.96113	1.32171	1.25718
67.2	118.6	0.059333	0.965206	1.3243	1.25709
67.3	106.8	0.066	0.969369	1.32666	1.25684
67.4	141.6	0.078889	0.973618	1.32877	1.2564
67.5	149.4	0.075778	0.977966	1.33065	1.25581
67.6	156.4	0.079556	0.982423	1.33228	1.25507
67.7	99.8	0.068889	0.986992	1.33367	1.25419
67.8	52.6	0.030222	0.991642	1.33482	1.25314
67.9	18.6	0.016444	0.996326	1.33573	1.25189
68	20.6	0.017556	1.00101	1.33638	1.25041
68.1	51.2	0.034222	1.00568	1.33679	1.24871
68.2	65.6	0.040444	1.01036	1.33696	1.24679
68.3	61.8	0.05	1.01506	1.33688	1.24467
68.4	81.8	0.046667	1.01977	1.33655	1.24235
68.5	70.6	0.051778	1.0245	1.33597	1.23985
68.6	77.8	0.056444	1.02926	1.33515	1.23717
68.7	131.8	0.081556	1.03403	1.33408	1.2343
68.8	89	0.058667	1.03884	1.33276	1.23127
68.9	37	0.038667	1.04369	1.3312	1.22809
69	51.2	0.031111	1.04853	1.3294	1.22472
69.1	65.8	0.055111	1.05335	1.32736	1.22115
69.2	92.4	0.066222	1.05816	1.32507	1.2174
69.3	108.8	0.073556	1.06298	1.32254	1.21349
69.4	164.8	0.098222	1.06781	1.31978	1.20944
69.5	154.2	0.079778	1.07269	1.31678	1.20527
69.6	146.2	0.066889	1.07763	1.31354	1.201
69.7	153	0.075778	1.08262	1.31008	1.19662
69.8	134	0.074	1.08766	1.30638	1.19214
69.9	105.2	0.061111	1.09272	1.30246	1.18755
70	89.8	0.059556	1.0978	1.29831	1.18284
70.1	81	0.070889	1.10286	1.29394	1.178
70.2	79	0.058889	1.1079	1.28935	1.17303
70.3	145.6	0.067111	1.11291	1.28455	1.16793
70.4	108.4	0.072222	1.11792	1.27953	1.16272
70.5	81.2	0.050889	1.12293	1.27431	1.15741
70.6	51.2	0.029333	1.12791	1.26888	1.15199
70.7	43	0.024222	1.13284	1.26324	1.14644
70.8	13.6	0.024444	1.13769	1.25741	1.14075
70.9	4.8	0.018	1.14244	1.25139	1.13491
71	16.4	0.019778	1.14709	1.24517	1.12891
71.1	16.6	0.020889	1.15162	1.23877	1.12276
71.2	11.6	0.017333	1.15605	1.23219	1.11648
71.3	20.8	0.032	1.16037	1.22544	1.11005
71.4	70.4	0.049333	1.16458	1.21851	1.10349
71.5	88.4	0.072889	1.1687	1.21141	1.09683
71.6	59.8	0.049111	1.17276	1.20415	1.0901
71.7	84.4	0.048889	1.17674	1.19674	1.08327
71.8	78.4	0.048222	1.18065	1.18917	1.07638
71.9	50.8	0.038889	1.18449	1.18145	1.06942
72	49.6	0.033556	1.18824	1.1736	1.06239
72.1	57.2	0.045778	1.19189	1.16561	1.05528
72.2	52.4	0.039333	1.19545	1.15748	1.0481
72.3	58.4	0.045556	1.1989	1.14924	1.04086
72.4	48.2	0.060444	1.20225	1.14087	1.03357
72.5	77.6	0.056	1.20549	1.13239	1.02622
72.6	105.6	0.068889	1.20865	1.1238	1.01883
72.7	97.6	0.062	1.21172	1.11511	1.01142
72.8	96.6	0.071111	1.21473	1.10633	1.00401
72.9	101.2	0.072444	1.21766	1.09746	0.996596
73	81.2	0.048667	1.22052	1.0885	0.989186
73.1	98.8	0.055778	1.22329	1.07947	0.981777
73.2	85.6	0.051111	1.22598	1.07037	0.974377
73.3	105.6	0.051333	1.22858	1.0612	0.966989
73.4	91.4	0.05	1.2311	1.05197	0.959626
73.5	131.4	0.069778	1.23353	1.0427	0.952289
73.6	142.4	0.076222	1.2359	1.03338	0.944998
73.7	114.6	0.064667	1.23821	1.02402	0.937774
73.8	102.6	0.065778	1.24046	1.01463	0.93061
73.9	95.2	0.057333	1.24263	1.00521	0.9235
74	75.8	0.058	1.24471	0.995778	0.916443
74.1	54.4	0.048222	1.24668	0.986332	0.909433
74.2	28	0.047778	1.24854	0.976881	0.90246
74.3	42.4	0.042222	1.25025	0.967432	0.895513
74.4	41	0.043333	1.25182	0.95799	0.888596
74.5	18	0.027556	1.25325	0.948564	0.881719
74.6	16.4	0.020889	1.25453	0.939158	0.874873
74.7	16.4	0.018	1.25565	0.929781	0.868059
74.8	10	0.026	1.25661	0.920439	0.86128
74.9	43	0.031333	1.2574	0.911137	0.854539
75	16.4	0.021333	1.25805	0.901884	0.847853
75.1	17.2	0.021778	1.25854	0.892684	0.841223
75.2	2.8	0.014222	1.25887	0.883546	0.834648
75.3	9.8	0.013778	1.25904	0.874474	0.828126
75.4	14.6	0.020444	1.25904	0.865476	0.821661
75.5	28	0.042444	1.25888	0.856559	0.815261
75.6	32.8	0.036	1.25856	0.847727	0.808939
75.7	35.4	0.047111	1.2581	0.838988	0.802704
75.8	41	0.048	1.2575	0.830348	0.796562
75.9	57.4	0.050444	1.25676	0.821813	0.790522
76	81.6	0.070667	1.25589	0.813389	0.784595
76.1	56.2	0.051111	1.25492	0.805082	0.778801
76.2	36.8	0.038444	1.25384	0.796897	0.773137
76.3	41	0.039778	1.25263	0.788841	0.767594
76.4	17.6	0.034222	1.25128	0.78092	0.762172
76.5	13	0.030222	1.24979	0.773138	0.756865
76.6	30.8	0.037333	1.24816	0.765502	0.751671
76.7	40	0.040889	1.24638	0.758017	0.746599
76.8	52.4	0.053778	1.24448	0.750688	0.741661
76.9	89.6	0.060222	1.24246	0.743521	0.736868
77	71.8	0.048	1.24035	0.73652	0.732244
77.1	94.8	0.054	1.23815	0.729691	0.727792
77.2	68.6	0.051556	1.23587	0.723039	0.723522
77.3	68	0.062444	1.23351	0.716568	0.719429
77.4	74.8	0.065333	1.23105	0.710282	0.71551
77.5	125.2	0.066	1.22851	0.704188	0.711772
77.6	111.6	0.065333	1.22591	0.698288	0.70824
77.7	103.6	0.076667	1.22327	0.692587	0.704923
77.8	90	0.064444	1.22057	0.687089	0.701816
77.9	47	0.051333	1.21781	0.681799	0.698913
78	36	0.032	1.21497	0.676719	0.696193
78.1	44.8	0.032222	1.21202	0.671854	0.693644
78.2	58.2	0.03	1.20898	0.667207	0.691269
78.3	58	0.039333	1.20585	0.662782	0.689078
78.4	94	0.052667	1.20264	0.658581	0.687074
78.5	77.2	0.054667	1.19938	0.654608	0.685277
78.6	61.4	0.045778	1.19606	0.650866	0.683686
78.7	59.6	0.036	1.19267	0.647357	0.682293
78.8	22.4	0.021111	1.18921	0.644084	0.681094
78.9	44.6	0.035111	1.18567	0.64105	0.680072
79	41.4	0.037556	1.18204	0.638256	0.67923
79.1	41	0.037778	1.17834	0.635705	0.678571
79.2	58.6	0.036222	1.17456	0.633399	0.678097
79.3	57.2	0.040667	1.17072	0.631339	0.677814
79.4	21.6	0.026667	1.16683	0.629527	0.677725
79.5	6	0.018667	1.16286	0.627964	0.677816
79.6	36.2	0.027778	1.1588	0.626652	0.67807
79.7	66.8	0.041111	1.15467	0.625591	0.678498
79.8	65.6	0.056	1.1505	0.624783	0.679119
79.9	57.4	0.059556	1.14629	0.624227	0.67994
80	63.6	0.059778	1.14204	0.623926	0.680957
80.1	96.8	0.057111	1.13776	0.623878	0.682169
80.2	43.6	0.036889	1.13347	0.624084	0.683592
80.3	82	0.054889	1.12915	0.624545	0.685208
80.4	46.2	0.051333	1.12481	0.625259	0.687022
80.5	29	0.039778	1.12045	0.626226	0.689024
80.6	55.2	0.042444	1.11605	0.627446	0.691198
80.7	41.8	0.032667	1.11162	0.628919	0.69355
80.8	36.8	0.044222	1.10717	0.630642	0.696077
80.9	84.4	0.062	1.10268	0.632616	0.698774
81	96.4	0.066	1.09819	0.634838	0.701658
81.1	113.4	0.069556	1.09373	0.637308	0.704744
81.2	119.6	0.083778	1.0893	0.640023	0.70804
81.3	184.2	0.097111	1.08492	0.642983	0.71155
81.4	143.8	0.083111	1.08062	0.646184	0.715302
81.5	92.4	0.064222	1.07641	0.649624	0.719291
81.6	98.4	0.056222	1.07224	0.653303	0.723479
81.7	97.2	0.060222	1.06812	0.657216	0.727857
81.8	116.8	0.071111	1.06404	0.661361	0.73242
81.9	61.8	0.070444	1.06001	0.665736	0.737175
82	70.4	0.062889	1.05602	0.670337	0.742098
82.1	75	0.065333	1.05205	0.675161	0.747176
82.2	111.8	0.053778	1.04811	0.680205	0.75241
82.3	108.6	0.052222	1.04424	0.685466	0.757814
82.4	71.8	0.056222	1.04042	0.69094	0.763391
82.5	56	0.050889	1.03666	0.696623	0.769119
82.6	96.4	0.069556	1.03292	0.702511	0.77498
82.7	124	0.074222	1.02924	0.7086	0.780982
82.8	120.2	0.063333	1.02564	0.714886	0.787145
82.9	130.2	0.070444	1.02212	0.721364	0.793468
83	105	0.059111	1.0187	0.728031	0.79995
83.1	53	0.048667	1.01537	0.734881	0.806577
83.2	73.4	0.067556	1.01208	0.741909	0.813316
83.3	84.8	0.070444	1.00884	0.749112	0.820158
83.4	109.2	0.080889	1.00567	0.756483	0.827109
83.5	92.8	0.054889	1.00257	0.764017	0.834178
83.6	87.6	0.059111	0.999561	0.771711	0.841358
83.7	26.2	0.052889	0.996624	0.779557	0.848636
83.8	65.6	0.056889	0.993728	0.78755	0.85598
83.9	95.6	0.051111	0.99088	0.795686	0.863388
84	115.2	0.060444	0.988109	0.803957	0.870877
84.1	91.2	0.058667	0.985435	0.81236	0.878458
84.2	77.4	0.056222	0.982852	0.820887	0.886119
84.3	87.6	0.068	0.980346	0.829532	0.893842
84.4	157	0.082889	0.977922	0.83829	0.901624
84.5	125	0.060222	0.975621	0.847154	0.909493
84.6	57.8	0.055778	0.973445	0.856119	0.917444
84.7	110.6	0.070444	0.97135	0.865177	0.925434
84.8	92	0.052444	0.969348	0.874323	0.933467
84.9	176.6	0.084889	0.967443	0.883551	0.941539
85	144	0.080444	0.965678	0.892852	0.949679
85.1	88.4	0.064444	0.964059	0.902222	0.957887
85.2	124.2	0.072667	0.962547	0.911653	0.966123
85.3	108.8	0.077333	0.961146	0.92114	0.974384
85.4	157.2	0.082889	0.959859	0.930674	0.982668
85.5	108.8	0.061111	0.958709	0.94025	0.990985
85.6	102.4	0.066	0.957681	0.94986	0.999319
85.7	119.4	0.066889	0.95676	0.959499	1.00765
85.8	84.8	0.056667	0.955954	0.969158	1.01598
85.9	96.6	0.062889	0.955248	0.978832	1.02429
86	164.6	0.098889	0.954639	0.988514	1.03256
86.1	156	0.083556	0.954168	0.998196	1.04084
86.2	107.8	0.064667	0.953849	1.00787	1.04913
86.3	159.4	0.079778	0.953653	1.01753	1.05738
86.4	147.4	0.078	0.953593	1.02718	1.06562
86.5	124.8	0.066222	0.953678	1.03679	1.07384
86.6	118.8	0.071333	0.953891	1.04638	1.08202
86.7	95.8	0.054889	0.954222	1.05592	1.09015
86.8	109	0.067556	0.954656	1.06541	1.09822
86.9	71	0.067778	0.955194	1.07485	1.10621
87	84.4	0.063778	0.955817	1.08424	1.1141
87.1	134.2	0.067556	0.956521	1.09355	1.12189
87.2	168.4	0.077556	0.957338	1.10279	1.1296
87.3	140.2	0.068222	0.958298	1.11195	1.13725
87.4	109.2	0.083556	0.959394	1.12102	1.14484
87.5	99.6	0.081111	0.960601	1.13	1.15232
87.6	138.8	0.081778	0.961903	1.13888	1.15969
87.7	120.8	0.064444	0.963318	1.14765	1.16695
87.8	70	0.054	0.964846	1.15632	1.17411
87.9	85.6	0.061556	0.966453	1.16486	1.18113
88	100.6	0.075778	0.968131	1.17328	1.188
88.1	88	0.072889	0.969892	1.18157	1.19472
88.2	30.8	0.056222	0.971732	1.18972	1.2013
88.3	96.6	0.076	0.973615	1.19773	1.20768
88.4	81.8	0.065111	0.975559	1.20559	1.2139
88.5	100	0.07	0.977574	1.2133	1.21995
88.6	100.2	0.06	0.979663	1.22084	1.22583
88.7	72.2	0.061778	0.98183	1.22823	1.23154
88.8	50.4	0.051333	0.984058	1.23544	1.23707
88.9	33.4	0.039111	0.986326	1.24248	1.24239
89	50.6	0.04	0.988616	1.24934	1.24749
89.1	56.2	0.048222	0.990933	1.25602	1.25238
89.2	43.4	0.046667	0.993283	1.2625	1.25704
89.3	48.2	0.040222	0.995658	1.26879	1.26148
89.4	133	0.065556	0.998055	1.27489	1.26569
89.5	143.2	0.078222	1.00052	1.28077	1.26971
89.6	140.4	0.081333	1.00309	1.28645	1.27355
89.7	130	0.08	1.00574	1.29192	1.27722
89.8	86	0.077556	1.00849	1.29718	1.28072
89.9	69.4	0.059333	1.01129	1.30221	1.284
90	55.6	0.046444	1.01413	1.30702	1.28706
90.1	90.2	0.065778	1.01699	1.31161	1.28988
90.2	55.4	0.042444	1.01989	1.31597	1.29248
90.3	66	0.068667	1.0228	1.32009	1.29484
90.4	112.4	0.069778	1.02574	1.32397	1.29696
90.5	121	0.071333	1.02871	1.32762	1.29885
90.6	138	0.094	1.03175	1.33103	1.30054
90.7	113.4	0.083111	1.03485	1.33419	1.30204
90.8	132.4	0.078	1.03801	1.3371	1.30333
90.9	61.2	0.051111	1.04123	1.33977	1.30441
91	102	0.052444	1.04448	1.34219	1.30526
91.1	90.6	0.054889	1.04774	1.34435	1.30588
91.2	69	0.049778	1.05104	1.34626	1.30627
91.3	61.6	0.05	1.05434	1.34792	1.30643
91.4	28	0.049556	1.05764	1.34932	1.30633
91.5	54.8	0.040667	1.06092	1.35046	1.30597
91.6	54.2	0.046889	1.06417	1.35134	1.30535
91.7	61.2	0.068	1.0674	1.35196	1.30448
91.8	126.2	0.082444	1.07062	1.35232	1.30336
91.9	75.6	0.044444	1.07386	1.35243	1.30202
92	59.8	0.035333	1.07711	1.35227	1.30045
92.1	63.6	0.046667	1.08035	1.35185	1.29864
92.2	59.6	0.043111	1.08356	1.35118	1.29659
92.3	69.6	0.047111	1.08675	1.35024	1.2943
92.4	78	0.061778	1.08992	1.34904	1.29177
92.5	61	0.032	1.09307	1.34759	1.28902
92.6	58.2	0.047778	1.0962	1.34587	1.28602
92.7	68.2	0.049111	1.09929	1.3439	1.2828
92.8	102	0.065111	1.10236	1.34168	1.27935
92.9	107.4	0.092444	1.10542	1.3392	1.27568
93	127.4	0.1	1.10847	1.33648	1.27182
93.1	150.2	0.085778	1.11154	1.3335	1.26778
93.2	146.8	0.081556	1.11463	1.33027	1.26358
93.3	113	0.085778	1.11775	1.3268	1.25921
93.4	100.4	0.084667	1.12088	1.32308	1.25467
93.5	40.2	0.047111	1.124	1.31912	1.24996
93.6	24	0.040889	1.12707	1.31493	1.24503
93.7	14.2	0.036889	1.13007	1.3105	1.23988
93.8	20.6	0.033778	1.13297	1.30584	1.2345
93.9	108.6	0.066	1.13579	1.30094	1.22889
94	142.6	0.075333	1.13857	1.29583	1.22311
94.1	164	0.082667	1.14135	1.29049	1.21718
94.2	148.2	0.082667	1.14415	1.28493	1.21114
94.3	83	0.080222	1.14696	1.27916	1.20498
94.4	107.6	0.070667	1.14975	1.27318	1.19867
94.5	125.2	0.062889	1.15251	1.26699	1.19223
94.6	87	0.052222	1.15525	1.2606	1.18565
94.7	80.2	0.044444	1.15796	1.25401	1.17894
94.8	68.8	0.047778	1.16062	1.24723	1.17209
94.9	31.2	0.027556	1.16321	1.24026	1.1651
95	14	0.010889	1.16572	1.23311	1.15795
95.1	8.6	0.021556	1.16813	1.22578	1.15063
95.2	12.8	0.017333	1.17042	1.21828	1.14314
95.3	6.8	0.013778	1.17259	1.2106	1.13548
95.4	37.4	0.036889	1.17464	1.20277	1.12767
95.5	41.8	0.051111	1.1766	1.19478	1.11972
95.6	72.4	0.059333	1.17845	1.18664	1.11163
95.7	55.8	0.052444	1.18023	1.17835	1.10345
95.8	71.6	0.052667	1.18193	1.16993	1.09516
95.9	69.4	0.051111	1.18355	1.16137	1.08678
96	30.6	0.030667	1.18511	1.15268	1.07832
